# Supplementary material for: A CRC–MYB-mediated local chromatin loop at the MAB4 locus determines auxin-mediated nectary size in Arabidopsis thaliana
Source: Research Square preprint supplement (doi:10.21203/rs.3.rs-7421252/v1), 2025-09-07
Supplement: Supplementary file 1 [file 0acf8b99e9fa5bfa670f6176.xlsx]

## Sheet: Stage12
Supplementary Data 3. Results of RNA-seq analysis for the wild type and crc at stage 12 and stage 13–14.
reference_id	AGI	Ler_12_1	Ler_12_2	Ler_12_3	crc_12_1	crc_12_2	crc_12_3	logconc	logfc	adj_pvalue	annotation
AT1G69180.1	AT1G69180	1295	2549	2594	54	82	55	5.61909	-4.90302	5.72969e-51	Plant-specific transcription factor YABBY family protein
AT4G29030.1	AT4G29030	276	297	455	40	25	17	8.82933	-3.44809	4.3097e-48	Putative membrane lipoprotein
AT3G08770.1	AT3G08770	534	695	830	179	203	194	7.87035	-1.6596	6.65797e-27	lipid transfer protein 6
AT5G44630.1	AT5G44630	131	392	285	19	16	20	4.89563	-3.71639	9.61704e-21	Terpenoid cyclases/Protein prenyltransferases superfamily protein
AT3G58780.2	AT3G58780	50	110	92	7	5	6	3.10133	-3.61801	9.61704e-21	K-box region and MADS-box transcription factor family protein
AT4G21100.1	AT4G21100	83	92	97	21	13	12	3.82755	-2.38375	3.64156e-20	damaged DNA binding protein 1B
AT2G35310.1	AT2G35310	60	81	97	11	16	12	4.58005	-2.42032	8.63728e-16	Transcriptional factor B3 family protein
AT2G38110.1	AT2G38110	351	701	631	152	181	154	6.10403	-1.62614	4.52766e-15	glycerol-3-phosphate acyltransferase 6
AT1G58430.1	AT1G58430	51	101	116	13	9	15	4.30715	-2.66078	1.90026e-14	GDSL-like Lipase/Acylhydrolase family protein
AT2G42830.1	AT2G42830	19	69	30	2	0	0	3.46188	-5.52422	1.67908e-13	K-box region and MADS-box transcription factor family protein
AT5G23940.1	AT5G23940	3550	6527	6416	1673	2261	1973	9.82325	-1.31529	1.12662e-12	HXXXD-type acyl-transferase family protein
AT1G12330.1	AT1G12330	363	368	497	176	164	142	6.40703	-1.16697	1.95028e-11	unknown protein
AT5G46760.1	AT5G46760	766	634	914	267	256	321	5.00747	-1.27271	2.23549e-11	Basic helix-loop-helix (bHLH) DNA-binding family protein
AT2G26580.1	AT2G26580	15	52	32	0	3	0	1.76936	-4.74301	3.58189e-11	plant-specific transcription factor YABBY family protein
AT2G22170.1	AT2G22170	31	26	60	5	7	3	5.43902	-2.73881	1.13493e-10	Lipase/lipooxygenase, PLAT/LH2 family protein
AT3G05600.1	AT3G05600	32	71	73	6	8	8	3.0349	-2.80368	2.75907e-10	alpha/beta-Hydrolases superfamily protein
AT1G23410.1	AT1G23410	53	102	110	17	28	13	4.18288	-2.00934	9.03215e-10	Ribosomal protein S27a / Ubiquitin family protein
AT5G46740.1	AT5G46740	125	122	146	42	36	49	3.37529	-1.45321	1.09633e-09	ubiquitin-specific protease 21
AT5G22880.1	AT5G22880	1018	999	1401	508	621	587	8.98666	-0.811457	1.47731e-09	histone B2
AT5G22500.1	AT5G22500	31	29	40	2	3	5	4.19053	-3.09782	2.15292e-09	fatty acid reductase 1
AT2G42885.1	AT2G42885	112	187	276	48	53	55	3.52036	-1.67941	5.12316e-09	Defensin-like (DEFL) family protein
AT1G53490.1	AT1G53490	2	9	8	191	189	180	4.65035	5.02806	5.12316e-09	RING/U-box superfamily protein
AT1G02020.2	AT1G02020	88	97	123	19	33	40	3.8549	-1.56161	8.57087e-09	nitroreductase family protein
AT4G35480.1	AT4G35480	55	115	124	24	19	24	3.13177	-1.94727	9.24428e-09	RING-H2 finger A3B
AT1G70270.1	AT1G70270	7	35	38	0	2	0	2.67155	-4.908	2.03089e-08	unknown protein
AT1G53480.1	AT1G53480	2	4	3	347	327	319	5.11763	6.88607	2.21986e-08	mto 1 responding down 1
AT5G55720.1	AT5G55720	23	67	71	11	10	5	3.24024	-2.43239	2.62694e-08	Pectin lyase-like superfamily protein
AT5G09730.1	AT5G09730	35	38	68	5	3	7	5.98096	-2.99969	2.94412e-08	beta-xylosidase 3
AT5G44620.1	AT5G44620	323	444	540	144	205	176	6.46714	-1.13669	4.17592e-08	cytochrome P450, family 706, subfamily A, polypeptide 3
AT3G11000.1	AT3G11000	25	32	45	11	2	2	3.45228	-2.55112	6.47705e-08	DCD (Development and Cell Death) domain protein
AT1G03410.1	AT1G03410	21	7	19	38	53	42	4.72971	1.67188	7.08887e-08	2-oxoglutarate (2OG) and Fe(II)-dependent oxygenase superfamily protein
AT5G45670.1	AT5G45670	748	801	987	409	401	360	7.95214	-0.940012	7.87702e-08	GDSL-like Lipase/Acylhydrolase superfamily protein
AT2G16760.1	AT2G16760	2	22	20	0	0	0	1.9833	-6.79905	1.00198e-07	Calcium-dependent phosphotriesterase superfamily protein
AT2G45920.1	AT2G45920	193	172	194	403	383	380	5.48231	1.22633	1.30962e-07	U-box domain-containing protein
AT3G54560.1	AT3G54560	797	871	1225	491	538	473	7.71271	-0.759322	2.36523e-07	histone H2A 11
AT1G24020.1	AT1G24020	339	490	522	168	176	155	6.83428	-1.26556	2.66478e-07	MLP-like protein 423
AT1G09210.1	AT1G09210	924	1122	1321	515	581	565	7.31468	-0.844665	2.70232e-07	calreticulin 1b
AT3G60900.1	AT3G60900	138	131	234	60	73	58	5.92927	-1.19859	2.73891e-07	FASCICLIN-like arabinogalactan-protein 10
AT1G60060.1	AT1G60060	173	128	189	308	312	261	4.90185	1.02432	3.0927e-07	Serine/threonine-protein kinase WNK (With No Lysine)-related
AT5G65360.1	AT5G65360	1385	1484	2000	716	1038	794	8.14168	-0.754294	3.15512e-07	Histone superfamily protein
AT4G20820.1	AT4G20820	18	5	16	104	56	124	2.64999	3.04803	3.50515e-07	FAD-binding Berberine family protein
AT3G17160.1	AT3G17160	3018	2897	3988	1626	1736	1891	9.18245	-0.732782	3.96729e-07	unknown protein
AT1G09560.1	AT1G09560	163	235	216	94	89	66	3.87264	-1.13859	4.11594e-07	germin-like protein 5
AT3G45930.1	AT3G45930	1810	1902	2532	1100	1227	1046	8.39178	-0.707834	4.31953e-07	Histone superfamily protein
AT1G15360.1	AT1G15360	57	138	111	11	18	6	2.16154	-2.96297	4.86502e-07	Integrase-type DNA-binding superfamily protein
AT2G30650.1	AT2G30650	24	87	58	11	8	5	3.38585	-2.64698	5.46787e-07	ATP-dependent caseinolytic (Clp) protease/crotonase family protein
AT2G04570.1	AT2G04570	923	1307	1340	437	424	461	7.38313	-1.26525	6.31027e-07	GDSL-like Lipase/Acylhydrolase superfamily protein
AT2G42840.1	AT2G42840	154	111	184	68	38	53	6.80165	-1.30699	8.5914e-07	protodermal factor 1
AT1G65370.1	AT1G65370	32	42	25	8	6	4	4.66234	-2.28469	8.79758e-07	TRAF-like family protein
AT5G23420.2	AT5G23420	1062	956	1516	503	603	665	7.38585	-0.805754	1.00695e-06	high-mobility group box 6
AT4G27570.1	AT4G27570	9	91	9	3	2	1	4.40797	-4.04742	1.65075e-06	UDP-Glycosyltransferase superfamily protein
AT3G46320.1	AT3G46320	1825	2022	2723	1112	1381	1070	8.50162	-0.700834	1.65075e-06	Histone superfamily protein
AT5G46750.1	AT5G46750	308	340	414	169	176	125	4.6173	-1.00053	1.83941e-06	ARF-GAP domain 9
AT5G54160.1	AT5G54160	110	216	190	60	64	61	5.29868	-1.31507	2.90594e-06	O-methyltransferase 1
AT5G20740.1	AT5G20740	2078	2115	2378	1058	1268	1047	8.06818	-0.797111	3.23829e-06	Plant invertase/pectin methylesterase inhibitor superfamily protein
AT5G50160.1	AT5G50160	191	209	278	314	449	379	4.32751	0.931193	4.92581e-06	ferric reduction oxidase 8
AT1G59650.1	AT1G59650	27	25	38	71	62	67	3.63804	1.33124	5.18285e-06	Protein of unknown function (DUF1336)
AT4G31330.1	AT4G31330	19	24	17	54	114	68	2.14361	2.11511	5.2635e-06	Protein of unknown function, DUF599
AT5G10400.1	AT5G10400	1159	1262	1690	687	787	718	7.83888	-0.725077	5.3112e-06	Histone superfamily protein
AT4G19970.1	AT4G19970	6	27	19	0	1	0	1.14746	-5.1186	7.79663e-06	unknown protein
AT3G20670.1	AT3G20670	798	886	1158	494	579	443	7.38236	-0.72666	1.0277e-05	histone H2A 13
AT4G31820.1	AT4G31820	247	274	380	129	126	151	4.95814	-0.963007	1.06134e-05	Phototropic-responsive NPH3 family protein
AT3G04010.1	AT3G04010	11	14	5	0	0	0	0.116198	-6.27608	1.11727e-05	O-Glycosyl hydrolases family 17 protein
AT5G59690.1	AT5G59690	4763	4874	6886	3135	3867	2714	9.54499	-0.582577	1.19279e-05	Histone superfamily protein
AT1G77855.1	AT1G77855	63	128	93	13	36	16	3.11227	-1.97899	1.26891e-05	unknown protein
AT5G60142.1	AT5G60142	88	161	174	37	54	38	3.28969	-1.53593	1.33039e-05	AP2/B3-like transcriptional factor family protein
AT5G59910.1	AT5G59910	10923	11285	14519	6206	8823	7060	10.7388	-0.558537	1.39178e-05	Histone superfamily protein
AT2G45120.1	AT2G45120	35	39	49	12	8	10	1.51098	-1.84408	1.43131e-05	C2H2-like zinc finger protein
AT1G70830.5	AT1G70830	1831	1825	2318	749	1011	724	6.89876	-1.09309	1.55308e-05	MLP-like protein 28
AT1G11600.1	AT1G11600	33	41	53	15	9	6	4.40272	-1.88666	1.75127e-05	cytochrome P450, family 77, subfamily B, polypeptide 1
AT4G37409.1	AT4G37409	41	67	88	6	3	4	0.781889	-3.68418	1.79684e-05	unknown protein
AT2G14900.1	AT2G14900	69	66	50	126	125	110	6.61481	1.11767	1.86802e-05	Gibberellin-regulated family protein
AT3G49270.1	AT3G49270	8	41	33	2	0	0	-0.0740366	-4.96178	1.93622e-05	unknown protein
AT1G07820.1	AT1G07820	4432	4575	6131	2991	3233	2756	9.3795	-0.572514	1.93622e-05	Histone superfamily protein
AT1G62500.1	AT1G62500	1413	948	2189	678	593	566	8.60519	-1.09307	1.95771e-05	Bifunctional inhibitor/lipid-transfer protein/seed storage 2S albumin superfamily protein
AT5G10390.1	AT5G10390	1086	1084	1703	636	841	621	7.65706	-0.693133	1.95771e-05	Histone superfamily protein
AT4G14130.1	AT4G14130	17	13	7	102	29	76	3.32665	2.61768	1.95771e-05	xyloglucan endotransglucosylase/hydrolase 15
AT5G48180.1	AT5G48180	2200	1854	2478	4308	2854	2885	8.86548	0.800022	2.00678e-05	nitrile specifier protein 5
AT5G59870.1	AT5G59870	904	989	1300	526	690	583	7.36499	-0.648145	2.26709e-05	histone H2A 6
AT2G36590.1	AT2G36590	10	22	13	1	0	0	0.444019	-4.92271	2.83077e-05	proline transporter 3
AT2G28740.1	AT2G28740	1009	1268	1526	599	707	589	7.56385	-0.828484	3.0721e-05	histone H4
AT3G49570.1	AT3G49570	2	2	2	37	59	39	2.54577	4.5688	4.04655e-05	response to low sulfur 3
AT2G15090.1	AT2G15090	190	274	303	71	75	91	5.98211	-1.51835	4.19293e-05	3-ketoacyl-CoA synthase 8
AT4G18960.2	AT4G18960	131	189	220	74	92	72	4.80321	-1.00367	5.11742e-05	K-box region and MADS-box transcription factor family protein
AT4G23810.1	AT4G23810	173	228	309	130	105	102	4.99389	-0.88572	5.202e-05	WRKY family transcription factor
AT5G25120.1	AT5G25120	1	1	6	19	13	17	1.22212	2.74671	5.23908e-05	ytochrome p450, family 71, subfamily B, polypeptide 11
AT2G20870.1	AT2G20870	1626	4178	3337	545	429	421	8.09068	-2.5542	5.28695e-05	cell wall protein precursor, putative
AT4G24050.1	AT4G24050	55	45	59	121	91	101	1.75364	1.1524	5.67374e-05	NAD(P)-binding Rossmann-fold superfamily protein
AT5G48485.1	AT5G48485	445	401	685	267	299	179	6.50307	-0.843819	7.47049e-05	Bifunctional inhibitor/lipid-transfer protein/seed storage 2S albumin superfamily protein
AT1G02300.1	AT1G02300	107	109	149	233	220	170	3.7178	0.952372	8.07444e-05	Cysteine proteinases superfamily protein
AT2G46680.1	AT2G46680	85	85	134	159	212	211	4.13437	1.1254	8.07444e-05	homeobox 7
AT1G06080.1	AT1G06080	22	16	22	1	3	4	3.23631	-2.67924	9.53759e-05	delta 9 desaturase 1
AT4G36220.1	AT4G36220	57	50	60	18	6	22	4.15904	-1.67816	9.53759e-05	ferulic acid 5-hydroxylase 1
AT2G42990.1	AT2G42990	11	41	45	1	6	8	2.91812	-2.47961	0.000108576	GDSL-like Lipase/Acylhydrolase superfamily protein
AT3G45980.1	AT3G45980	1248	1393	1857	886	996	894	7.64288	-0.513855	0.00012005	Histone superfamily protein
AT5G58280.1	AT5G58280	64	53	94	22	26	18	3.86009	-1.47963	0.00012684	AP2/B3-like transcriptional factor family protein
AT5G25090.1	AT5G25090	656	672	907	449	473	388	6.95052	-0.589494	0.000127025	early nodulin-like protein 13
AT1G12350.1	AT1G12350	144	129	164	89	52	60	3.18218	-0.942187	0.000133437	4-phospho-panto-thenoylcysteine synthetase
AT4G37410.1	AT4G37410	42	72	89	6	3	4	0.881109	-3.73842	0.000157221	cytochrome P450, family 81, subfamily F, polypeptide 4
AT1G07660.1	AT1G07660	1992	2184	2803	1441	1621	1357	8.25028	-0.480725	0.000174008	Histone superfamily protein
AT4G13690.1	AT4G13690	201	211	253	96	130	119	4.57274	-0.773137	0.000186505	unknown protein
AT4G39330.1	AT4G39330	3022	4087	4372	1802	2200	1959	9.19947	-0.777827	0.000210426	cinnamyl alcohol dehydrogenase 9
AT1G13290.1	AT1G13290	135	210	218	40	80	68	3.23095	-1.41395	0.000225215	C2H2-like zinc finger protein
AT3G18550.1	AT3G18550	8	7	11	71	30	49	0.816315	2.7021	0.000234771	TCP family transcription factor
AT5G24660.1	AT5G24660	5	15	5	67	162	91	3.6617	3.7647	0.000245295	response to low sulfur 2
AT5G03680.1	AT5G03680	328	319	440	497	678	655	4.7642	0.931341	0.000253811	Duplicated homeodomain-like superfamily protein
AT5G67110.3	AT5G67110	114	119	154	53	71	45	3.16446	-1.01677	0.000293671	basic helix-loop-helix (bHLH) DNA-binding superfamily protein
AT4G26740.1	AT4G26740	11	6	10	35	28	28	-0.488628	1.9166	0.000293671	seed gene 1
AT5G48850.1	AT5G48850	5	4	2	31	50	37	2.88736	3.51745	0.000301302	Tetratricopeptide repeat (TPR)-like superfamily protein
AT4G08910.1	AT4G08910	24	77	52	11	9	15	3.17809	-1.96433	0.000302296	unknown protein
AT5G40950.1	AT5G40950	640	489	775	774	729	1131	7.752	0.655715	0.000317777	ribosomal protein large subunit 27
AT1G49430.1	AT1G49430	93	161	141	56	58	59	4.56323	-1.02645	0.000325851	long-chain acyl-CoA synthetase 2
AT2G03505.1	AT2G03505	18	58	26	7	5	4	1.87825	-2.52014	0.000398845	Carbohydrate-binding X8 domain superfamily protein
AT5G62000.4	AT5G62000	1548	1969	2330	1245	1307	1199	7.49043	-0.463899	0.000404279	auxin response factor 2
AT2G22680.1	AT2G22680	132	167	178	76	75	60	3.1882	-1.00584	0.000418386	Zinc finger (C3HC4-type RING finger) family protein
AT1G09200.1	AT1G09200	391	481	664	273	312	240	6.3926	-0.709491	0.000452547	Histone superfamily protein
AT2G36730.1	AT2G36730	72	53	83	26	33	30	2.78511	-1.04139	0.0004629	Pentatricopeptide repeat (PPR) superfamily protein
AT5G59970.1	AT5G59970	694	796	1113	450	534	498	7.37631	-0.625726	0.000479751	Histone superfamily protein
AT4G02060.2	AT4G02060	189	202	340	95	144	137	4.93334	-0.762655	0.000583371	Minichromosome maintenance (MCM2/3/5) family protein
AT3G53190.1	AT3G53190	233	253	369	123	164	128	5.68267	-0.855287	0.000615968	Pectin lyase-like superfamily protein
AT3G55880.2	AT3G55880	18	26	32	1	4	3	1.28014	-3.01334	0.000680964	Alpha/beta hydrolase related protein
AT1G22590.1	AT1G22590	121	136	220	242	220	237	4.60221	0.746615	0.00119098	AGAMOUS-like 87
AT4G23680.1	AT4G23680	4	44	2	4	2	0	5.67271	-2.90578	0.00119936	Polyketide cyclase/dehydrase and lipid transport superfamily protein
AT4G02520.1	AT4G02520	71	38	46	215	271	210	4.10146	2.31621	0.00132503	glutathione S-transferase PHI 2
AT1G78000.1	AT1G78000	9	1	5	31	39	29	1.61913	2.86535	0.00134865	sulfate transporter 1;2
AT5G42680.1	AT5G42680	196	147	212	298	277	301	4.32449	0.836721	0.0013975	Protein of unknown function, DUF617
AT3G15270.1	AT3G15270	67	73	103	117	114	178	4.12579	0.936378	0.0013975	squamosa promoter binding protein-like 5
AT5G56300.1	AT5G56300	16	29	15	2	3	6	2.36801	-2.26472	0.00143262	gibberellic acid methyltransferase 2
AT2G27970.1	AT2G27970	514	516	704	305	405	337	5.97645	-0.547744	0.00143526	CDK-subunit 2
AT4G21590.2	AT4G21590	11	24	22	5	4	4	3.2543	-1.92819	0.00158566	endonuclease 3
AT2G26180.1	AT2G26180	109	116	170	59	85	48	4.40595	-0.855134	0.00158566	IQ-domain 6
AT1G11850.3	AT1G11850	424	388	510	231	238	206	5.37836	-0.793226	0.00158566	unknown protein
AT2G28790.1	AT2G28790	1478	1339	1965	845	982	700	9.27662	-0.736683	0.00158566	Pathogenesis-related thaumatin superfamily protein
AT3G16180.1	AT3G16180	1655	1584	2033	2127	2662	2005	7.34767	0.539287	0.00158566	Major facilitator superfamily protein
AT2G38230.1	AT2G38230	271	238	400	545	383	418	6.30906	0.763083	0.00158566	pyridoxine biosynthesis 1.1
AT3G14740.1	AT3G14740	104	87	151	43	68	51	4.32769	-0.887563	0.00198551	RING/FYVE/PHD zinc finger superfamily protein
AT1G14900.1	AT1G14900	902	866	1140	633	623	490	6.95443	-0.558145	0.00198551	high mobility group A
AT5G61030.1	AT5G61030	375	446	588	219	271	268	6.38209	-0.711345	0.00220335	glycine-rich RNA-binding protein 3
AT4G35640.1	AT4G35640	9	16	15	41	43	37	2.65293	1.75817	0.00244414	serine acetyltransferase 3;2
AT2G28720.1	AT2G28720	534	521	743	248	289	246	6.88512	-1.0151	0.00249435	Histone superfamily protein
AT5G19290.1	AT5G19290	1741	1728	2383	1102	1369	1120	8.23186	-0.523602	0.002557	alpha/beta-Hydrolases superfamily protein
AT3G25480.1	AT3G25480	221	163	265	291	317	288	5.45231	0.649342	0.00311287	Rhodanese/Cell cycle control phosphatase superfamily protein
AT2G46720.1	AT2G46720	13	16	14	1	3	3	2.95375	-2.39215	0.00345447	3-ketoacyl-CoA synthase 13
AT2G26740.1	AT2G26740	74	45	74	121	92	93	3.23192	0.844648	0.00376894	soluble epoxide hydrolase
AT1G17200.1	AT1G17200	122	119	163	83	58	71	6.14122	-0.746976	0.0038545	Uncharacterised protein family (UPF0497)
AT2G16570.1	AT2G16570	86	80	76	33	47	38	3.73672	-0.871275	0.00409267	GLN phosphoribosyl pyrophosphate amidotransferase 1
AT4G26150.1	AT4G26150	10	17	19	2	0	2	0.458027	-3.23271	0.00450956	cytokinin-responsive gata factor 1
AT4G27230.2	AT4G27230	183	179	237	111	131	100	5.10006	-0.630136	0.00470844	histone H2A 2
AT2G29980.1	AT2G29980	356	304	456	561	505	470	6.47331	0.645987	0.00505285	fatty acid desaturase 3
AT1G19330.3	AT1G19330	220	255	346	144	154	134	4.26131	-0.741277	0.00548043	unknown protein
AT3G04990.1	AT3G04990	14	27	56	0	2	0	-0.416299	-5.14352	0.00571271	unknown protein
AT1G30600.1	AT1G30600	166	171	157	87	86	86	4.58941	-0.77311	0.00598826	Subtilase family protein
AT2G27040.1	AT2G27040	647	680	940	481	495	423	6.70399	-0.51232	0.00598826	Argonaute family protein
AT1G02110.1	AT1G02110	129	121	173	76	82	86	4.25403	-0.611704	0.00664487	Protein of unknown function (DUF630 and DUF632)
AT4G29020.2	AT4G29020	1304	1077	1503	861	672	691	9.06777	-0.623943	0.00674637	glycine-rich protein
AT5G24780.2	AT5G24780	2888	2852	4341	1929	1673	1182	8.6	-0.88317	0.00693345	vegetative storage protein 1
AT3G54000.3	AT3G54000	601	807	691	298	474	314	6.42052	-0.803187	0.00714836	unknown protein
AT3G51240.1	AT3G51240	289	481	535	124	271	158	7.02479	-1.0678	0.00724416	flavanone 3-hydroxylase
AT4G23800.1	AT4G23800	6083	6437	7954	3642	4438	3679	10.056	-0.626527	0.00724416	HMG (high mobility group) box protein
AT3G23830.1	AT3G23830	693	621	943	485	465	418	6.86819	-0.534735	0.00724416	glycine-rich RNA-binding protein 4
AT1G46480.1	AT1G46480	135	182	210	247	295	272	4.59312	0.802157	0.00724416	WUSCHEL related homeobox 4
AT2G36090.1	AT2G36090	0	0	0	3	5	8	1.99777	5.5384	0.00724416	F-box family protein
AT1G51680.1	AT1G51680	734	756	869	924	1333	1030	6.31356	0.644231	0.00732094	4-coumarate:CoA ligase 1
AT2G33620.2	AT2G33620	600	608	761	415	463	386	6.40142	-0.46447	0.00754348	AT hook motif DNA-binding family protein
AT4G21990.1	AT4G21990	73	90	86	186	231	188	4.90312	1.43756	0.00754348	APS reductase 3
AT2G18050.2	AT2G18050	126	74	229	48	37	52	3.84512	-1.41149	0.00757363	histone H1-3
AT5G13930.1	AT5G13930	354	593	593	178	306	220	7.20037	-0.964992	0.00757363	Chalcone and stilbene synthase family protein
AT5G49100.1	AT5G49100	162	227	263	126	115	128	5.4903	-0.642139	0.00788366	unknown protein
AT5G03545.1	AT5G03545	27	3	6	8	204	73	2.98053	3.08583	0.00788366	unknown protein
AT2G16260.1	AT2G16260	8	12	23	3	0	0	0.0383781	-3.47707	0.00819698	GR-RBP1 (glycine-rich RNA-binding protein 1)
AT2G18969.1	AT2G18969	6	31	17	4	1	3	1.96189	-2.55419	0.00819698	unknown protein
AT5G06150.1	AT5G06150	270	273	392	184	216	149	5.57614	-0.584011	0.00832196	Cyclin family protein
AT4G08480.1	AT4G08480	216	183	239	146	79	118	3.92565	-0.716436	0.00837565	mitogen-activated protein kinase kinase kinase 9
AT4G16610.1	AT4G16610	45	90	64	31	14	33	2.58086	-1.191	0.00862924	C2H2-like zinc finger protein
AT5G24270.2	AT5G24270	13	35	31	44	62	59	2.64529	1.22928	0.00864353	Calcium-binding EF-hand family protein
AT2G36120.1	AT2G36120	1747	1080	2038	4317	3716	3734	6.68325	1.46899	0.00864353	Glycine-rich protein family
AT1G51170.1	AT1G51170	189	229	280	119	132	125	4.69287	-0.714007	0.00906022	Protein kinase superfamily protein
AT5G15530.1	AT5G15530	120	229	197	85	113	94	5.04663	-0.741147	0.00923012	biotin carboxyl carrier protein 2
AT2G42800.1	AT2G42800	254	282	370	157	186	166	5.2051	-0.650992	0.00923012	receptor like protein 29
AT2G37620.1	AT2G37620	346	426	551	241	306	237	5.87235	-0.573572	0.00945617	actin 1
AT5G10580.1	AT5G10580	4	2	6	19	19	19	-0.398775	2.40332	0.00945617	Protein of unknown function, DUF599
AT4G11080.1	AT4G11080	2238	2076	3022	1419	1700	1487	8.6982	-0.487506	0.00975175	HMG (high mobility group) box protein
AT3G63300.1	AT3G63300	80	100	93	47	47	41	3.65951	-0.849615	0.00977311	FORKED 1
AT1G25530.1	AT1G25530	50	59	67	86	116	80	2.98728	0.851205	0.0102905	Transmembrane amino acid transporter family protein
AT5G25130.1	AT5G25130	4	11	12	26	28	25	1.75425	1.71548	0.0107266	cytochrome P450, family 71, subfamily B, polypeptide 12
AT5G01240.1	AT5G01240	232	204	282	337	367	389	4.8592	0.785085	0.0108534	like AUXIN RESISTANT 1
AT5G46780.1	AT5G46780	43	46	63	16	16	16	1.12053	-1.4727	0.0114168	VQ motif-containing protein
AT3G54180.1	AT3G54180	112	110	147	70	56	59	4.19287	-0.81411	0.0114832	cyclin-dependent kinase B1;1
AT3G63130.1	AT3G63130	404	450	588	268	344	294	6.04171	-0.490666	0.0115123	RAN GTPase activating protein 1
AT5G14640.1	AT5G14640	98	124	165	49	67	63	4.40739	-0.927042	0.0115272	shaggy-like kinase 13
AT1G72670.1	AT1G72670	124	97	166	50	85	61	4.31414	-0.793753	0.0115272	IQ-domain 8
AT5G60760.1	AT5G60760	50	90	73	33	24	35	4.06516	-1.04613	0.0116248	P-loop containing nucleoside triphosphate hydrolases superfamily protein
AT4G37870.1	AT4G37870	275	435	488	174	190	242	7.69773	-0.805029	0.0117648	phosphoenolpyruvate carboxykinase 1
AT1G17190.1	AT1G17190	75	29	65	31	19	8	3.6705	-1.35183	0.0119998	glutathione S-transferase tau 26
AT1G72970.1	AT1G72970	249	297	370	183	187	165	6.53781	-0.596278	0.0119998	Glucose-methanol-choline (GMC) oxidoreductase family protein
AT5G55690.1	AT5G55690	4	3	4	17	19	13	-0.944706	2.28954	0.0122646	MADS-box transcription factor family protein
AT1G76410.1	AT1G76410	62	19	48	138	78	84	1.96671	1.40225	0.012459	RING/U-box superfamily protein
AT1G75590.1	AT1G75590	45	35	47	66	83	62	2.94644	0.904654	0.0124832	SAUR-like auxin-responsive protein family
AT2G15120.1	AT2G15120	26	43	60	8	14	13	3.4293	-1.6795	0.0127146	pseudogene
AT5G63860.1	AT5G63860	2630	3169	3718	2177	2332	1987	8.45475	-0.377037	0.013311	Regulator of chromosome condensation (RCC1) family protein
AT4G23750.1	AT4G23750	331	450	510	239	294	217	5.41675	-0.610108	0.0133759	cytokinin response factor 2
AT1G32450.1	AT1G32450	18	21	18	24	71	80	1.57524	1.76393	0.0137306	nitrate transporter 1.5
AT2G36190.1	AT2G36190	2	84	2	2	2	1	5.94507	-4.02521	0.0149289	cell wall invertase 4
AT4G01410.1	AT4G01410	271	334	401	206	214	211	5.29965	-0.495073	0.0154525	Late embryogenesis abundant (LEA) hydroxyproline-rich glycoprotein family
AT2G46730.1	AT2G46730	7	6	4	0	0	0	-0.536281	-5.46792	0.0156826	pseudogene
AT5G51590.1	AT5G51590	127	138	155	72	89	76	4.26742	-0.653577	0.0169073	AT hook motif DNA-binding family protein
AT2G34490.1	AT2G34490	133	96	161	74	56	70	3.97128	-0.774666	0.0174697	cytochrome P450, family 710, subfamily A, polypeptide 2
AT2G46980.2	AT2G46980	197	187	272	108	146	123	4.73786	-0.615921	0.017975	unknown protein
AT2G16440.1	AT2G16440	89	104	153	49	71	64	4.04425	-0.723114	0.0181583	Minichromosome maintenance (MCM2/3/5) family protein
AT5G64910.1	AT5G64910	918	324	536	1016	1012	1217	6.03205	1.02851	0.019042	unknown protein
AT4G34730.1	AT4G34730	243	171	295	299	268	330	5.99122	0.527607	0.0191407	ribosome-binding factor A family protein
AT2G28350.1	AT2G28350	93	142	131	49	69	73	3.64292	-0.772938	0.0192055	auxin response factor 10
AT2G47910.2	AT2G47910	50	17	50	72	67	55	3.35093	0.91702	0.0192842	chlororespiratory reduction 6
AT1G50110.1	AT1G50110	188	154	223	98	117	98	4.90654	-0.672185	0.0199321	D-aminoacid aminotransferase-like PLP-dependent enzymes superfamily protein
AT3G53940.1	AT3G53940	100	137	117	49	76	52	3.60894	-0.84364	0.0200927	Mitochondrial substrate carrier family protein
AT4G00870.1	AT4G00870	347	335	508	179	239	199	5.45923	-0.759864	0.0201647	basic helix-loop-helix (bHLH) DNA-binding superfamily protein
AT1G63710.1	AT1G63710	45	150	118	38	42	37	3.82002	-1.25747	0.0204619	cytochrome P450, family 86, subfamily A, polypeptide 7
AT3G05830.2	AT3G05830	145	148	193	85	93	99	5.09276	-0.631552	0.0204619	unknown protein
AT5G47450.1	AT5G47450	1	6	5	18	17	11	-0.273438	2.07917	0.0207725	tonoplast intrinsic protein 2;3
AT3G27280.2	AT3G27280	262	224	406	158	175	205	5.40493	-0.532371	0.023144	prohibitin 4
AT3G15000.1	AT3G15000	1515	1496	2075	1162	1202	1150	7.73028	-0.350468	0.023144	cobalt ion binding
AT5G62140.1	AT5G62140	51	58	72	73	108	105	4.69613	0.835153	0.023144	unknown protein
AT2G18970.1	AT2G18970	2	13	7	0	1	0	0.705556	-3.89703	0.0235205	unknown protein
AT1G09815.1	AT1G09815	110	87	173	77	55	71	3.97443	-0.667569	0.0235688	polymerase delta 4
AT4G28080.1	AT4G28080	2494	1710	2971	3150	2616	3040	8.59402	0.487627	0.0235688	Tetratricopeptide repeat (TPR)-like superfamily protein
AT2G04160.1	AT2G04160	2	38	8	0	4	1	1.43774	-3.09586	0.0238083	Subtilisin-like serine endopeptidase family protein
AT3G12320.1	AT3G12320	53	47	56	135	105	138	3.86608	1.44631	0.0238727	unknown protein
AT5G06440.3	AT5G06440	67	59	86	109	96	100	4.05847	0.705949	0.0242141	unknown protein
AT3G18780.1	AT3G18780	1883	1698	2525	2556	2447	2495	8.74473	0.483292	0.0243734	actin 2
AT1G68862.1	AT1G68862	6	13	13	0	1	4	1.90061	-2.42069	0.0248238	unknown protein
AT1G71710.1	AT1G71710	170	167	237	115	128	95	4.70217	-0.581216	0.0248532	DNAse I-like superfamily protein
AT2G41680.1	AT2G41680	130	122	182	200	173	180	5.15298	0.534325	0.0248577	NADPH-dependent thioredoxin reductase C
AT4G16690.1	AT4G16690	1055	738	1222	1490	1095	1204	6.27864	0.518836	0.0256944	methyl esterase 16
AT5G23760.1	AT5G23760	3764	3236	4400	4666	5001	5456	8.68277	0.585077	0.0268487	Copper transport protein family
AT1G04770.1	AT1G04770	193	178	197	379	629	418	6.13138	1.48501	0.0268867	Tetratricopeptide repeat (TPR)-like superfamily protein
AT4G04830.2	AT4G04830	0	0	0	3	5	7	1.82143	5.44695	0.0268867	methionine sulfoxide reductase B5
AT1G21540.1	AT1G21540	14	24	21	10	2	3	3.08131	-1.78186	0.0273613	AMP-dependent synthetase and ligase family protein
AT5G10440.1	AT5G10440	15	21	22	5	7	6	2.12059	-1.49483	0.027457	cyclin d4;2
AT2G31070.1	AT2G31070	36	19	30	48	55	46	5.44152	0.981114	0.0275641	TCP domain protein 10
AT3G61850.1	AT3G61850	414	350	454	519	480	448	5.57415	0.423059	0.0277154	Dof-type zinc finger DNA-binding family protein
AT5G44020.1	AT5G44020	7	3	13	40	11	27	3.82707	1.96575	0.0278654	HAD superfamily, subfamily IIIB acid phosphatase
AT4G26850.1	AT4G26850	1822	1867	2428	3252	3587	2902	7.94549	0.848883	0.0282224	mannose-1-phosphate guanylyltransferase (GDP)s;GDP-galactose:mannose-1-phosphate guanylyltransferases;GDP-galactose:glucose-1-phosphate guanylyltransferases;GDP-galactose:myoinositol-1-phosphate guanylyltransferases;glucose-1-phosphate guanylyltransferase
AT3G46940.1	AT3G46940	684	746	1074	449	564	484	7.34756	-0.55476	0.0282806	DUTP-PYROPHOSPHATASE-LIKE 1
AT1G32670.1	AT1G32670	0	3	0	9	23	11	1.08787	3.79591	0.0291295	unknown protein
AT2G16676.1	AT2G16676	2	0	0	9	5	10	-1.46794	3.51606	0.0291556	unknown protein
AT5G35490.1	AT5G35490	0	1	0	7	5	5	1.10927	3.80895	0.0291556	mto 1 responding up 1
AT1G07370.1	AT1G07370	103	93	141	47	62	68	4.36903	-0.743362	0.0294483	proliferating cellular nuclear antigen 1
AT5G03870.1	AT5G03870	389	345	500	232	308	230	6.22167	-0.499589	0.0294483	Glutaredoxin family protein
AT2G26750.1	AT2G26750	41	30	28	90	52	51	2.68437	1.12	0.0294483	alpha/beta-Hydrolases superfamily protein
AT1G31335.1	AT1G31335	1447	1196	1516	968	1037	821	7.38631	-0.387607	0.0294823	unknown protein
AT3G27360.1	AT3G27360	1243	1244	1708	826	982	926	8.0108	-0.436042	0.0296745	Histone superfamily protein
AT5G13840.2	AT5G13840	311	317	412	224	224	176	5.27584	-0.558361	0.0299992	FIZZY-related 3
AT1G29980.1	AT1G29980	578	664	894	431	486	373	6.31067	-0.543964	0.03016	Protein of unknown function, DUF642
AT1G14770.1	AT1G14770	76	80	103	39	51	49	3.69994	-0.718273	0.0307028	RING/FYVE/PHD zinc finger superfamily protein
AT3G16980.1	AT3G16980	60	54	81	23	37	22	2.82601	-1.06453	0.0315726	RNA polymerases M/15 Kd subunit
AT1G07790.1	AT1G07790	968	1115	1411	700	774	720	7.3953	-0.49207	0.0338372	Histone superfamily protein
AT5G10980.1	AT5G10980	919	1024	1257	743	770	586	7.34587	-0.43258	0.0338372	Histone superfamily protein
AT5G54600.1	AT5G54600	1502	1233	1895	1784	1549	2008	8.13055	0.393918	0.0338372	Translation protein SH3-like family protein
AT1G01320.1	AT1G01320	3289	2589	3578	3754	3657	4120	8.90762	0.462885	0.0338372	Tetratricopeptide repeat (TPR)-like superfamily protein
AT2G27770.1	AT2G27770	92	90	140	140	161	143	4.8255	0.650087	0.034331	Plant protein of unknown function (DUF868)
AT5G05080.2	AT5G05080	352	373	523	263	281	256	5.65943	-0.456775	0.0344811	ubiquitin-conjugating enzyme 22
AT1G73602.1	AT1G73602	15	14	7	4	2	0	4.09767	-2.37407	0.0349892	conserved peptide upstream open reading frame 32
AT1G73600.1	AT1G73600	15	14	7	4	2	0	4.09767	-2.37407	0.0349892	S-adenosyl-L-methionine-dependent methyltransferases superfamily protein
AT1G62780.1	AT1G62780	233	191	279	322	260	301	6.07445	0.511405	0.0364051	unknown protein
AT3G54820.1	AT3G54820	329	421	491	170	269	258	6.19057	-0.658785	0.0367107	plasma membrane intrinsic protein 2;5
AT1G01490.2	AT1G01490	6895	5983	8141	8091	8928	9541	8.95894	0.515003	0.0368536	Heavy metal transport/detoxification superfamily protein
AT5G56500.1	AT5G56500	186	181	310	95	130	133	4.9038	-0.721651	0.0386096	TCP-1/cpn60 chaperonin family protein
AT3G51290.2	AT3G51290	120	106	151	73	77	67	5.29819	-0.615668	0.0389852	Protein of unknown function (DUF630) ;Protein of unknown function (DUF632)
AT1G53070.1	AT1G53070	407	476	599	276	360	236	6.94245	-0.58805	0.0389852	Legume lectin family protein
AT2G16660.1	AT2G16660	77	104	44	169	135	91	4.20359	0.93252	0.0389852	Major facilitator superfamily protein
AT3G52820.1	AT3G52820	48	50	72	64	95	96	3.01409	0.765942	0.0394855	purple acid phosphatase 22
AT1G63480.1	AT1G63480	74	100	123	58	65	37	3.99624	-0.711555	0.0396171	AT hook motif DNA-binding family protein
AT1G25340.2	AT1G25340	4	7	6	19	27	19	-0.469812	2.07543	0.0396171	myb domain protein 116
AT5G44635.1	AT5G44635	117	130	164	63	101	80	4.28466	-0.574664	0.0400808	minichromosome maintenance (MCM2/3/5) family protein
AT1G61810.1	AT1G61810	95	55	178	321	222	243	2.201	1.49784	0.0400808	beta-glucosidase 45
AT4G22540.1	AT4G22540	81	128	140	73	61	46	4.04484	-0.777334	0.0400833	OSBP(oxysterol binding protein)-related protein 2A
AT1G71500.1	AT1G71500	820	616	1027	1095	859	1055	7.68917	0.48062	0.0402391	Rieske (2Fe-2S) domain-containing protein
AT1G02340.1	AT1G02340	3	5	11	0	1	0	1.42486	-3.64056	0.0409223	basic helix-loop-helix (bHLH) DNA-binding superfamily protein
AT1G32540.1	AT1G32540	25	42	58	19	20	16	3.86888	-0.992555	0.0410211	lsd one like 1
AT3G07800.1	AT3G07800	210	209	308	160	167	121	5.25709	-0.512662	0.0413444	Thymidine kinase
AT5G49020.2	AT5G49020	49	56	74	29	30	31	3.0741	-0.808497	0.042581	protein arginine methyltransferase 4A
AT1G74790.1	AT1G74790	34	33	68	23	21	18	3.8397	-0.92358	0.0427221	catalytics
AT3G02210.1	AT3G02210	61	52	82	34	30	29	2.60759	-0.879946	0.0430459	COBRA-like protein 1 precursor
AT5G67390.2	AT5G67390	66	34	81	116	134	89	3.14376	1.10118	0.0433583	unknown protein
AT1G27590.1	AT1G27590	15	13	16	6	2	3	0.200202	-1.79144	0.0437248	unknown protein
AT2G35410.1	AT2G35410	131	85	156	196	150	154	4.84314	0.615828	0.0437248	RNA-binding (RRM/RBD/RNP motifs) family protein
AT5G23100.1	AT5G23100	436	444	540	291	329	295	4.59371	-0.460796	0.0440501	Protein of unknown function, DUF617
AT1G52500.1	AT1G52500	590	548	805	430	393	436	6.23299	-0.439342	0.0444425	MUTM homolog-1
AT2G28380.1	AT2G28380	301	274	392	221	206	208	5.3872	-0.424008	0.0444425	dsRNA-binding protein 2
AT3G48990.1	AT3G48990	127	106	147	167	173	156	4.91035	0.56179	0.0444425	AMP-dependent synthetase and ligase family protein
AT1G62180.2	AT1G62180	444	472	548	689	1009	711	6.32345	0.884864	0.0444425	5'adenylylphosphosulfate reductase 2
AT5G22750.1	AT5G22750	82	61	85	20	39	51	3.37917	-0.87502	0.0446361	DNA/RNA helicase protein
AT5G05690.1	AT5G05690	737	602	995	1187	996	939	6.08723	0.612872	0.0448393	Cytochrome P450 superfamily protein
AT2G18740.2	AT2G18740	177	182	213	127	114	119	4.77198	-0.493622	0.0453808	Small nuclear ribonucleoprotein family protein
AT5G32460.1	AT5G32460	23	12	28	46	37	46	0.451928	1.22261	0.0465781	Transcriptional factor B3 family protein
AT2G21790.1	AT2G21790	1147	930	1360	684	799	778	7.28641	-0.423691	0.0469426	ribonucleotide reductase 1
AT2G28760.2	AT2G28760	129	162	147	217	224	199	3.89248	0.70548	0.0470919	UDP-XYL synthase 6
AT5G63650.1	AT5G63650	55	81	85	42	31	40	4.12816	-0.790688	0.0470976	SNF1-related protein kinase 2.5
AT2G44830.1	AT2G44830	243	281	424	175	213	164	4.82299	-0.588258	0.0470976	Protein kinase superfamily protein
AT5G60200.1	AT5G60200	595	567	835	420	461	415	5.53206	-0.437854	0.0470976	TARGET OF MONOPTEROS 6
AT3G16190.1	AT3G16190	113	95	195	187	161	194	3.95828	0.631794	0.0470976	Isochorismatase family protein
AT5G03390.1	AT5G03390	121	66	127	54	65	47	4.04866	-0.733827	0.048992	Protein of unknown function (DUF295)
AT3G27940.1	AT3G27940	0	0	0	5	7	2	-0.115715	5.3473	0.048992	LOB domain-containing protein 26
AT5G10180.1	AT5G10180	34	99	97	94	255	166	4.4964	1.32958	0.0490503	slufate transporter 2;1
AT5G47060.1	AT5G47060	46	67	31	25	20	18	4.69461	-1.05527	0.0498762	Protein of unknown function (DUF581)
AT3G57550.2	AT3G57550	320	351	509	241	243	239	6.22702	-0.517521	0.0506353	guanylate kinase
AT1G02190.1	AT1G02190	80	173	120	77	79	42	5.86711	-0.76349	0.0519021	Fatty acid hydroxylase superfamily
AT5G49760.1	AT5G49760	142	130	150	165	200	183	4.48704	0.545643	0.0519594	Leucine-rich repeat protein kinase family protein
AT1G41830.1	AT1G41830	282	336	345	365	447	415	5.7716	0.513727	0.0519855	SKU5-similar 6
AT5G60930.1	AT5G60930	547	507	722	365	398	372	6.35676	-0.463226	0.0525776	P-loop containing nucleoside triphosphate hydrolases superfamily protein
AT1G10070.2	AT1G10070	32	33	56	103	62	69	1.89421	1.14915	0.0526198	branched-chain amino acid transaminase 2
AT2G48020.2	AT2G48020	38	73	66	81	112	93	3.80334	0.85671	0.0528314	Major facilitator superfamily protein
AT3G56090.1	AT3G56090	1167	1439	1595	775	991	760	7.53379	-0.565912	0.0528314	ferritin 3
AT5G23150.1	AT5G23150	271	234	310	323	314	348	4.94024	0.449883	0.0528314	Tudor/PWWP/MBT domain-containing protein
AT4G11890.1	AT4G11890	0	0	0	5	7	3	-0.576533	5.44449	0.0547761	Protein kinase superfamily protein
AT3G09920.2	AT3G09920	60	69	79	111	88	108	3.66487	0.736612	0.0565505	phosphatidyl inositol monophosphate 5 kinase
AT5G13550.1	AT5G13550	111	98	106	148	126	138	3.48455	0.555786	0.056623	sulfate transporter 4.1
AT1G71015.1	AT1G71015	3	2	2	9	15	6	1.05144	2.20599	0.057695	unknown protein
AT1G20696.3	AT1G20696	773	818	1121	582	650	490	6.71885	-0.472503	0.0581137	high mobility group B3
AT3G16520.3	AT3G16520	58	39	66	95	78	67	5.10833	0.740574	0.0581137	UDP-glucosyl transferase 88A1
AT1G20693.1	AT1G20693	1919	1971	2712	1213	1483	1350	7.99871	-0.524075	0.0595305	high mobility group B2
AT2G34310.3	AT2G34310	165	152	227	237	224	212	4.47866	0.491757	0.0605368	unknown protein
AT5G37010.1	AT5G37010	118	137	187	89	102	69	4.43457	-0.581823	0.0605368	unknown protein
AT5G57050.2	AT5G57050	256	292	306	150	160	207	5.45593	-0.557039	0.0607107	Protein phosphatase 2C family protein
AT3G11250.1	AT3G11250	1050	916	1244	719	787	671	7.70518	-0.383305	0.0607719	Ribosomal protein L10 family protein
AT3G56050.1	AT3G56050	417	413	563	314	343	282	5.41186	-0.388361	0.0607719	Protein kinase family protein
AT4G27310.1	AT4G27310	89	64	61	130	115	133	4.51351	0.972099	0.0615873	B-box type zinc finger family protein
AT4G29060.1	AT4G29060	6273	4355	6708	6658	6178	6773	10.2054	0.359332	0.0616088	elongation factor Ts family protein
AT2G25140.1	AT2G25140	63	71	94	41	46	29	3.65893	-0.792396	0.0625859	casein lytic proteinase B4
AT2G34300.2	AT2G34300	1031	1006	1198	655	724	725	7.25661	-0.450507	0.0625859	S-adenosyl-L-methionine-dependent methyltransferases superfamily protein
AT3G23890.2	AT3G23890	890	918	1075	614	665	650	7.15385	-0.409142	0.0625859	topoisomerase II
AT3G47340.1	AT3G47340	262	29	315	3032	105	937	6.69548	3.00919	0.0625859	glutamine-dependent asparagine synthase 1
AT5G61460.1	AT5G61460	284	228	351	170	150	207	4.73621	-0.525476	0.0631416	P-loop containing nucleoside triphosphate hydrolases superfamily protein
AT1G12780.1	AT1G12780	1321	786	1533	3278	1166	2242	6.07632	1.08091	0.0636123	UDP-D-glucose/UDP-D-galactose 4-epimerase 1
AT4G13195.1	AT4G13195	20	35	27	17	11	6	2.97063	-1.09393	0.0636123	CLAVATA3/ESR-RELATED 44
AT2G41650.1	AT2G41650	330	375	537	291	292	231	5.81572	-0.421627	0.0642543	unknown protein
AT5G08640.1	AT5G08640	402	608	666	239	376	293	7.53797	-0.713538	0.0642543	flavonol synthase 1
AT4G23740.1	AT4G23740	46	42	53	16	28	26	2.79788	-0.831597	0.0644467	Leucine-rich repeat protein kinase family protein
AT5G11550.1	AT5G11550	1531	1630	1886	935	1182	1134	7.475	-0.465773	0.0648431	ARM repeat superfamily protein
AT3G02640.1	AT3G02640	920	901	1346	691	818	619	7.34095	-0.386596	0.064905	unknown protein
AT1G68060.1	AT1G68060	920	979	1240	626	768	761	7.13784	-0.365802	0.0655267	microtubule-associated proteins 70-1
AT2G16780.1	AT2G16780	90	83	94	50	54	45	3.34835	-0.67024	0.0655267	Transducin family protein / WD-40 repeat family protein
AT3G59810.1	AT3G59810	84	92	102	65	57	39	3.59506	-0.613803	0.0655267	Small nuclear ribonucleoprotein family protein
AT5G08290.1	AT5G08290	509	530	616	334	451	339	5.97765	-0.389105	0.0655267	mRNA splicing factor, thioredoxin-like U5 snRNP
AT1G78570.1	AT1G78570	266	416	438	145	264	217	6.41297	-0.671136	0.0657872	rhamnose biosynthesis 1
AT1G16630.1	AT1G16630	364	379	463	262	272	200	6.00069	-0.542425	0.0665887	unknown protein
AT4G30860.1	AT4G30860	35	32	41	15	14	18	2.5405	-1.01793	0.0674941	SET domain group 4
AT1G06570.2	AT1G06570	118	109	119	220	117	189	4.24178	0.773607	0.0679247	phytoene desaturation 1
AT2G45640.2	AT2G45640	1613	1573	2090	1211	1403	1234	7.81354	-0.277223	0.0679247	SIN3 associated polypeptide P18
AT3G57410.1	AT3G57410	499	499	606	656	633	580	6.52835	0.394139	0.0679247	villin 3
AT5G15970.1	AT5G15970	1624	1893	1793	767	731	774	9.53615	-1.06811	0.0681109	stress-responsive protein (KIN2) / stress-induced protein (KIN2) / cold-responsive protein (COR6.6) / cold-regulated protein (COR6.6)
AT3G23810.1	AT3G23810	1163	1412	1463	1616	2020	1587	9.21855	0.533381	0.0693491	S-adenosyl-l-homocysteine (SAH) hydrolase 2
AT4G19950.1	AT4G19950	88	61	113	38	64	37	2.65074	-0.726245	0.0701347	unknown protein
AT4G28680.1	AT4G28680	17	39	35	8	19	9	2.43265	-1.16119	0.0701347	L-tyrosine decarboxylase
AT1G78440.1	AT1G78440	44	36	46	10	12	7	0.394618	-1.93711	0.0704627	Arabidopsis thaliana gibberellin 2-oxidase 1
AT2G05300.1	AT2G05300	34	30	52	15	19	16	1.48316	-1.02015	0.0710083	pseudogene
AT3G13682.1	AT3G13682	2	3	7	8	12	15	0.125249	1.69806	0.0710517	LSD1-like2
AT1G11840.2	AT1G11840	2010	2504	3110	1565	1891	1608	7.91999	-0.411592	0.0710687	glyoxalase I homolog
AT1G67260.1	AT1G67260	11	11	17	19	43	27	1.91649	1.36195	0.0710687	TCP family transcription factor
AT3G22640.1	AT3G22640	2	1	4	161	4	50	0.0641711	5.1107	0.0712537	cupin family protein
AT1G54090.1	AT1G54090	222	217	226	271	282	261	5.13135	0.456162	0.0717804	exocyst subunit exo70 family protein D2
AT3G53730.1	AT3G53730	225	279	368	189	197	170	6.32738	-0.465252	0.0717804	Histone superfamily protein
AT2G36870.1	AT2G36870	142	96	191	172	228	188	4.49364	0.648438	0.0725338	xyloglucan endotransglucosylase/hydrolase 32
AT1G67630.1	AT1G67630	29	16	36	9	9	14	1.67187	-1.14274	0.0736357	DNA polymerase alpha 2
AT1G61580.1	AT1G61580	71	73	70	101	118	86	6.37139	0.67321	0.0737812	R-protein L3 B
AT5G39420.1	AT5G39420	6	12	9	16	25	19	1.7272	1.30863	0.0737812	CDC2C
AT4G02290.1	AT4G02290	203	216	255	124	184	102	6.01959	-0.546903	0.0741912	glycosyl hydrolase 9B13
AT1G75080.1	AT1G75080	147	160	163	76	107	108	4.1293	-0.525354	0.074199	Brassinosteroid signalling positive regulator (BZR1) family protein
AT4G25620.1	AT4G25620	111	88	100	151	127	144	3.71994	0.663574	0.0742613	hydroxyproline-rich glycoprotein family protein
AT4G38070.1	AT4G38070	786	755	964	475	537	485	7.07999	-0.568031	0.0742613	basic helix-loop-helix (bHLH) DNA-binding superfamily protein
AT5G40260.1	AT5G40260	13	59	38	14	8	12	3.30366	-1.53087	0.0742613	Nodulin MtN3 family protein
AT5G51750.1	AT5G51750	269	203	381	183	155	160	6.70366	-0.577519	0.0742613	subtilase 1.3
AT5G52600.1	AT5G52600	10	16	29	3	7	9	2.46004	-1.32718	0.0742613	myb domain protein 82
AT1G04820.1	AT1G04820	2912	3230	4030	2403	2704	2154	9.22782	-0.310075	0.074782	tubulin alpha-4 chain
AT2G37460.1	AT2G37460	231	355	417	389	631	520	4.10931	0.795032	0.0752937	nodulin MtN21 /EamA-like transporter family protein
AT2G38810.3	AT2G38810	42	34	56	24	19	18	3.35284	-0.923985	0.0766653	histone H2A 8
AT5G05270.1	AT5G05270	215	300	342	82	205	134	6.9683	-0.856172	0.0772442	Chalcone-flavanone isomerase family protein
AT2G18560.1	AT2G18560	27	26	30	49	49	40	2.20324	0.903689	0.0776218	UDP-Glycosyltransferase superfamily protein
AT4G01450.3	AT4G01450	454	298	518	579	659	635	4.37799	0.747597	0.0776218	nodulin MtN21 /EamA-like transporter family protein
AT4G22560.1	AT4G22560	68	104	116	47	59	45	3.48228	-0.754577	0.0786582	unknown protein
AT3G18750.2	AT3G18750	211	209	263	147	144	147	5.05966	-0.464154	0.078729	with no lysine (K) kinase 6
AT4G11175.1	AT4G11175	84	120	154	136	178	157	4.80221	0.578073	0.0799833	Nucleic acid-binding, OB-fold-like protein
AT3G22850.1	AT3G22850	92	90	75	51	50	27	3.84089	-0.853863	0.080009	Aluminium induced protein with YGL and LRDR motifs
AT4G34870.1	AT4G34870	7262	7414	10311	5098	6145	5430	10.1611	-0.400583	0.0800288	rotamase cyclophilin 5
AT1G26540.1	AT1G26540	206	217	262	112	165	151	4.79071	-0.505277	0.0809272	Agenet domain-containing protein
AT1G47340.1	AT1G47340	320	312	420	226	223	255	5.46826	-0.398804	0.0809272	F-box and associated interaction domains-containing protein
AT2G22540.2	AT2G22540	35	23	42	21	11	9	4.41718	-1.09259	0.0809272	K-box region and MADS-box transcription factor family protein
AT3G55560.1	AT3G55560	7	9	20	6	3	0	3.32733	-1.77115	0.0809272	AT-hook protein of GA feedback 2
AT2G22240.2	AT2G22240	259	318	386	154	212	205	6.40461	-0.577341	0.0816887	myo-inositol-1-phosphate synthase 2
AT1G65710.1	AT1G65710	335	291	399	225	249	183	5.86179	-0.464246	0.0822377	unknown protein
AT4G22240.1	AT4G22240	239	334	300	185	199	147	5.96812	-0.559001	0.0822377	Plastid-lipid associated protein PAP / fibrillin family protein
AT5G06980.3	AT5G06980	51	58	51	122	102	117	3.75163	1.24542	0.0822377	unknown protein
AT5G16250.1	AT5G16250	2431	2351	3231	1999	1997	1482	9.35245	-0.36745	0.0822377	unknown protein
AT5G16990.1	AT5G16990	143	154	197	96	95	106	4.1431	-0.554155	0.0822377	Zinc-binding dehydrogenase family protein
AT3G11580.1	AT3G11580	57	53	65	88	79	84	2.8902	0.694462	0.0823327	AP2/B3-like transcriptional factor family protein
AT1G67340.1	AT1G67340	199	161	254	135	130	124	4.55167	-0.473057	0.0824304	HCP-like superfamily protein with MYND-type zinc finger
AT4G16215.1	AT4G16215	6	13	16	22	28	37	1.46464	1.48958	0.0826854	unknown protein
AT4G27980.1	AT4G27980	143	136	226	85	88	89	5.43071	-0.750552	0.0826854	Domain of unknown function (DUF3444)
AT1G26780.2	AT1G26780	35	63	71	18	22	30	1.22985	-1.08738	0.083295	myb domain protein 117
AT2G18660.1	AT2G18660	2	0	2	14	8	5	0.591446	2.83214	0.083295	plant natriuretic peptide A
AT1G19970.1	AT1G19970	92	86	97	52	50	52	4.26428	-0.665117	0.083561	ER lumen protein retaining receptor family protein
AT3G62690.1	AT3G62690	3	9	9	15	23	11	0.489189	1.38255	0.0835811	AtL5
AT5G51330.1	AT5G51330	55	40	62	87	96	85	2.38389	0.950398	0.0835811	SWITCH1
AT5G11450.1	AT5G11450	221	174	247	275	232	274	5.60259	0.462162	0.0837862	Mog1/PsbP/DUF1795-like photosystem II reaction center PsbP family protein
AT5G01650.1	AT5G01650	594	563	762	404	482	471	6.21349	-0.320952	0.0847664	Tautomerase/MIF superfamily protein
AT1G01690.1	AT1G01690	36	45	42	20	18	18	2.68658	-0.963728	0.0848048	putative recombination initiation defects 3
AT1G16910.1	AT1G16910	0	0	3	15	1	13	-0.341912	3.36503	0.0858386	Protein of unknown function (DUF640)
AT1G54385.1	AT1G54385	172	164	201	91	120	89	5.11613	-0.66855	0.0860704	ARM repeat superfamily protein
AT3G03130.1	AT3G03130	338	368	436	215	259	226	6.51499	-0.53385	0.0860704	unknown protein
AT3G17820.1	AT3G17820	111	113	142	129	201	135	5.12507	0.518786	0.0868248	glutamine synthetase 1.3
AT1G05440.1	AT1G05440	44	60	59	28	31	23	3.25765	-0.819018	0.087022	C-8 sterol isomerases
AT1G07320.3	AT1G07320	1111	884	1456	1328	1206	1252	7.80958	0.324559	0.087271	ribosomal protein L4
AT1G71850.1	AT1G71850	172	163	219	80	128	106	4.64143	-0.642099	0.0882528	Ubiquitin carboxyl-terminal hydrolase family protein
AT3G24495.1	AT3G24495	14	12	20	4	6	2	1.32702	-1.72402	0.0882528	MUTS homolog 7
AT5G13300.1	AT5G13300	928	945	1216	641	830	665	6.66535	-0.356461	0.0882528	ARF GTPase-activating protein
AT5G14920.1	AT5G14920	520	304	431	710	514	559	6.0056	0.677421	0.0882528	Gibberellin-regulated family protein
ATCG00430.1	ATCG00430	151	123	190	238	214	207	4.57891	0.691617	0.0882528	photosystem II reaction center protein G
AT1G79110.2	AT1G79110	337	424	430	197	243	260	5.25544	-0.602802	0.0882914	zinc ion binding
AT5G66580.1	AT5G66580	9	34	12	6	4	9	4.18413	-1.36924	0.0882914	unknown protein
AT2G42680.1	AT2G42680	213	211	276	148	158	145	4.42823	-0.45573	0.089286	multiprotein bridging factor 1A
AT5G17220.1	AT5G17220	6	9	6	1	2	0	2.69761	-2.51014	0.0893626	glutathione S-transferase phi 12
AT1G01725.1	AT1G01725	25	22	34	61	43	34	1.7602	0.950742	0.0894184	unknown protein
AT1G22690.1	AT1G22690	1	1	0	11	6	10	3.97505	3.66602	0.0894184	Gibberellin-regulated family protein
AT4G39380.2	AT4G39380	20	32	26	11	11	7	1.60178	-1.2544	0.0895888	unknown protein
ATCG00650.1	ATCG00650	1249	987	1335	1799	1450	1559	7.66188	0.605404	0.0898042	ribosomal protein S18
AT5G44030.1	AT5G44030	198	206	216	257	339	291	4.76066	0.677626	0.0905274	cellulose synthase A4
AT5G54500.2	AT5G54500	390	417	514	521	554	432	6.27441	0.365377	0.0905274	flavodoxin-like quinone reductase 1
AT2G39730.2	AT2G39730	5734	5312	7687	9448	8014	8406	10.8841	0.652441	0.0906182	rubisco activase
AT4G03100.1	AT4G03100	318	249	326	207	219	170	5.41244	-0.410728	0.0906182	Rho GTPase activating protein with PAK-box/P21-Rho-binding domain
AT4G38780.1	AT4G38780	2	3	3	16	13	8	0.59714	2.32818	0.0906182	Pre-mRNA-processing-splicing factor
AT4G30090.1	AT4G30090	22	11	23	4	6	7	2.05269	-1.51543	0.0906911	embryo defective 1353
AT1G04020.1	AT1G04020	35	37	38	14	14	19	2.56425	-1.05286	0.0907754	breast cancer associated RING 1
AT4G18770.1	AT4G18770	131	124	111	193	192	162	3.94136	0.731406	0.0908002	myb domain protein 98
AT4G37310.1	AT4G37310	36	19	25	43	39	47	4.19751	0.857268	0.0908002	cytochrome P450, family 81, subfamily H, polypeptide 1
AT5G24150.2	AT5G24150	5	8	4	20	11	18	3.5407	1.66483	0.0908002	FAD/NAD(P)-binding oxidoreductase family protein
AT1G01300.1	AT1G01300	693	640	836	448	552	428	6.59729	-0.428537	0.0912827	Eukaryotic aspartyl protease family protein
AT1G15470.1	AT1G15470	31	37	54	17	27	18	2.47818	-0.791063	0.0933393	Transducin/WD40 repeat-like superfamily protein
AT3G15570.1	AT3G15570	129	118	151	94	88	68	5.31018	-0.494018	0.0933393	Phototropic-responsive NPH3 family protein
AT2G07170.1	AT2G07170	85	68	85	46	47	40	3.3896	-0.665685	0.093356	ARM repeat superfamily protein
AT5G48930.1	AT5G48930	250	295	344	347	368	320	5.19071	0.393755	0.0934609	hydroxycinnamoyl-CoA shikimate/quinate hydroxycinnamoyl transferase
AT1G55260.2	AT1G55260	468	613	673	361	420	320	6.77751	-0.50177	0.0936011	Bifunctional inhibitor/lipid-transfer protein/seed storage 2S albumin superfamily protein
AT3G59700.1	AT3G59700	6	3	3	0	0	0	-0.635249	-4.97637	0.0936951	lectin-receptor kinase
AT1G19650.2	AT1G19650	67	73	93	35	55	34	3.03503	-0.731833	0.0949585	Sec14p-like phosphatidylinositol transfer family protein
AT4G33790.1	AT4G33790	76	90	118	118	155	121	4.685	0.651873	0.0956369	Jojoba acyl CoA reductase-related male sterility protein
AT1G72645.1	AT1G72645	95	86	104	156	133	128	3.7875	0.720883	0.0957134	unknown protein
AT3G57860.1	AT3G57860	49	29	64	22	16	29	2.56275	-0.886332	0.0957134	UV-B-insensitive 4-like
AT3G05380.5	AT3G05380	293	284	446	204	212	247	5.08466	-0.434535	0.0966832	DIRP ;Myb-like DNA-binding domain
AT4G00895.1	AT4G00895	250	264	298	336	301	324	6.20477	0.41463	0.0966832	ATPase, F1 complex, OSCP/delta subunit protein
AT4G22390.1	AT4G22390	17	15	22	7	3	7	0.845663	-1.46506	0.0978903	F-box associated ubiquitination effector family protein
AT5G25250.1	AT5G25250	0	0	1	4	11	5	0.681538	4.05701	0.0982007	SPFH/Band 7/PHB domain-containing membrane-associated protein family
AT3G22210.1	AT3G22210	905	732	1209	1192	1112	1011	7.03236	0.411591	0.0989685	unknown protein
AT2G47880.1	AT2G47880	6	18	2	1	2	0	1.0017	-2.89019	0.100692	Glutaredoxin family protein
AT4G26130.1	AT4G26130	503	462	609	283	351	323	6.00439	-0.542236	0.100939	unknown protein
AT1G12230.2	AT1G12230	644	583	814	858	763	735	6.2544	0.388903	0.101552	Aldolase superfamily protein
AT5G47630.2	AT5G47630	141	138	175	74	107	97	4.5716	-0.532094	0.101552	mitochondrial acyl carrier protein 3
AT5G59950.2	AT5G59950	482	507	710	388	417	333	5.97458	-0.393772	0.101552	RNA-binding (RRM/RBD/RNP motifs) family protein
AT5G43530.1	AT5G43530	11	13	18	5	1	1	1.52908	-2.33841	0.101559	Helicase protein with RING/U-box domain
AT4G09460.1	AT4G09460	32	42	35	58	65	65	3.75115	0.943193	0.101639	myb domain protein 6
AT3G09070.1	AT3G09070	728	634	1014	439	587	493	6.5125	-0.456752	0.101836	Protein of unknown function (DUF740)
AT1G68585.1	AT1G68585	140	95	141	147	162	165	3.96825	0.510542	0.102173	unknown protein
AT3G46030.1	AT3G46030	2791	2763	4116	2030	2544	2306	8.94252	-0.303369	0.103491	Histone superfamily protein
AT5G51810.1	AT5G51810	17	17	19	5	4	7	5.01599	-1.5349	0.103491	gibberellin 20 oxidase 2
AT1G05100.1	AT1G05100	25	65	44	11	23	19	2.0529	-1.18497	0.103741	mitogen-activated protein kinase kinase kinase 18
AT1G53730.2	AT1G53730	105	97	133	140	142	159	3.52235	0.576225	0.103741	STRUBBELIG-receptor family 6
AT1G06190.2	AT1G06190	957	711	1058	977	997	1082	7.60148	0.344968	0.10388	Rho termination factor
AT2G36080.1	AT2G36080	34	8	18	86	31	40	1.99947	1.5556	0.10388	AP2/B3-like transcriptional factor family protein
AT3G13730.1	AT3G13730	60	61	93	88	92	92	2.23263	0.529325	0.104083	cytochrome P450, family 90, subfamily D, polypeptide 1
AT2G32010.1	AT2G32010	97	121	200	77	70	92	3.14133	-0.605792	0.104086	CVP2 like 1
AT5G01520.1	AT5G01520	16	8	13	31	30	17	2.09511	1.24176	0.104086	RING/U-box superfamily protein
AT1G18020.1	AT1G18020	7	5	7	29	14	19	1.77064	1.8655	0.104535	FMN-linked oxidoreductases superfamily protein
AT3G01500.3	AT3G01500	587	627	545	1089	727	705	8.54175	0.670789	0.10462	carbonic anhydrase 1
AT5G54640.1	AT5G54640	564	662	797	405	476	475	6.53817	-0.401422	0.10462	Histone superfamily protein
AT5G60450.1	AT5G60450	60	93	102	41	48	53	4.09779	-0.666907	0.10462	auxin response factor 4
AT4G21270.1	AT4G21270	243	256	329	152	199	190	5.10441	-0.436225	0.105012	kinesin 1
AT3G13810.3	AT3G13810	114	149	158	164	194	223	4.46778	0.634186	0.105016	indeterminate(ID)-domain 11
AT4G24040.1	AT4G24040	97	38	120	239	130	201	3.09067	1.3785	0.105016	trehalase 1
AT5G22430.1	AT5G22430	794	1422	1333	456	685	491	7.13906	-0.960875	0.10537	Pollen Ole e 1 allergen and extensin family protein
AT1G01390.1	AT1G01390	9	7	2	0	1	1	-0.144275	-2.82933	0.105595	UDP-Glycosyltransferase superfamily protein
AT4G13710.1	AT4G13710	380	530	527	278	320	243	5.16615	-0.609462	0.105595	Pectin lyase-like superfamily protein
AT1G01910.5	AT1G01910	220	242	381	186	213	156	5.34498	-0.411369	0.105739	P-loop containing nucleoside triphosphate hydrolases superfamily protein
AT2G44770.1	AT2G44770	185	266	267	286	370	257	4.96763	0.511819	0.105739	ELMO/CED-12 family protein
AT4G27790.1	AT4G27790	4	9	9	0	0	1	-0.847814	-3.87386	0.105739	Calcium-binding EF hand family protein
ATCG00440.1	ATCG00440	4089	3777	5201	6236	5215	4933	9.19744	0.50858	0.105739	NADH:ubiquinone/plastoquinone oxidoreductase, chain 3 protein
ATCG01010.1	ATCG01010	469	382	482	752	555	650	6.3734	0.726536	0.105739	NADH-Ubiquinone oxidoreductase (complex I), chain 5 protein
AT5G02890.1	AT5G02890	48	60	73	34	21	36	3.89941	-0.808541	0.106814	HXXXD-type acyl-transferase family protein
AT3G55060.1	AT3G55060	129	103	144	75	90	71	4.67745	-0.494345	0.107113	unknown protein
AT1G49870.1	AT1G49870	641	611	857	411	488	455	6.31878	-0.457434	0.107658	unknown protein
AT3G10610.1	AT3G10610	672	651	909	501	540	494	7.27543	-0.357726	0.110045	Ribosomal S17 family protein
AT1G29920.1	AT1G29920	3019	2797	3025	5220	3752	6267	11.9417	0.950217	0.11069	chlorophyll A/B-binding protein 2
AT3G33000.1	AT3G33000	54	53	59	98	91	111	2.99236	1.02077	0.111852	pseudogene
AT2G27810.2	AT2G27810	429	364	469	258	292	299	5.83601	-0.398684	0.112585	nucleobase-ascorbate transporter 12
AT2G35940.2	AT2G35940	949	911	1350	1320	1267	1249	5.97436	0.445392	0.112585	BEL1-like homeodomain 1
AT1G12845.1	AT1G12845	155	152	184	99	120	85	5.16865	-0.518894	0.11269	unknown protein
AT1G26910.1	AT1G26910	124	107	148	62	82	79	4.54603	-0.586706	0.112746	Ribosomal protein L16p/L10e family protein
AT3G10180.1	AT3G10180	62	45	54	18	24	37	3.057	-0.856442	0.11277	P-loop containing nucleoside triphosphate hydrolases superfamily protein
AT1G13320.3	AT1G13320	134	148	146	85	99	83	4.21435	-0.515782	0.113794	protein phosphatase 2A subunit A3
AT3G17840.1	AT3G17840	1009	1079	1495	765	955	799	7.14171	-0.324957	0.113794	receptor-like kinase 902
AT1G70570.1	AT1G70570	61	47	64	79	74	71	3.4459	0.557191	0.114755	anthranilate phosphoribosyltransferase, putative
AT5G65250.1	AT5G65250	15	20	30	42	39	25	2.60974	0.88738	0.11517	unknown protein
AT1G62610.4	AT1G62610	11	11	16	1	6	4	1.03678	-1.57797	0.115197	NAD(P)-binding Rossmann-fold superfamily protein
AT3G23670.1	AT3G23670	108	77	109	53	65	61	3.97685	-0.539218	0.115773	phragmoplast-associated kinesin-related protein, putative
AT3G13920.4	AT3G13920	236	172	281	268	280	240	5.50187	0.377047	0.116451	eukaryotic translation initiation factor 4A1
AT1G27045.1	AT1G27045	55	74	129	42	36	39	2.59466	-0.93037	0.116527	Homeobox-leucine zipper protein family
AT4G03550.1	AT4G03550	287	312	444	246	245	213	6.59462	-0.380882	0.116648	glucan synthase-like 5
AT5G03230.1	AT5G03230	244	267	339	411	342	379	4.9155	0.593744	0.116726	Protein of unknown function, DUF584
AT3G51380.1	AT3G51380	5	8	9	2	2	0	0.268418	-2.18532	0.117438	IQ-domain 20
AT1G68400.1	AT1G68400	133	136	201	97	100	91	4.59229	-0.519757	0.118146	leucine-rich repeat transmembrane protein kinase family protein
AT1G80050.1	AT1G80050	672	394	710	840	876	747	4.83553	0.65786	0.118146	adenine phosphoribosyl transferase 2
AT1G08520.1	AT1G08520	1118	938	1480	1364	1130	1485	7.6923	0.361218	0.1191	ALBINA 1
AT2G35170.1	AT2G35170	8	6	15	18	16	21	1.38383	1.09998	0.1191	Histone H3 K4-specific methyltransferase SET7/9 family protein
AT3G13570.1	AT3G13570	233	254	329	162	211	174	5.54911	-0.39833	0.1191	SC35-like splicing factor 30A
AT5G26742.3	AT5G26742	5875	4436	6610	6375	5984	6554	9.9709	0.342286	0.1191	DEAD box RNA helicase (RH3)
AT5G56860.1	AT5G56860	213	153	238	305	247	286	5.05399	0.656121	0.1191	GATA type zinc finger transcription factor family protein
AT3G23050.1	AT3G23050	754	820	1018	1138	1107	1100	7.26185	0.54504	0.11981	indole-3-acetic acid 7
AT1G45201.1	AT1G45201	149	278	211	67	95	81	4.48019	-1.24638	0.119965	triacylglycerol lipase-like 1
AT1G05680.1	AT1G05680	121	103	214	200	175	237	5.24512	0.692782	0.120193	Uridine diphosphate glycosyltransferase 74E2
AT3G17520.1	AT3G17520	0	0	0	29	0	0	0.338225	6.40367	0.120193	Late embryogenesis abundant protein (LEA) family protein
AT3G19590.1	AT3G19590	73	57	79	39	40	36	3.53258	-0.683479	0.120193	Transducin/WD40 repeat-like superfamily protein
AT3G27160.1	AT3G27160	5183	3852	5610	5131	4848	6046	9.87821	0.309543	0.120193	Ribosomal protein S21 family protein
AT5G51480.1	AT5G51480	3	5	7	0	1	0	2.65213	-3.32559	0.120193	SKU5 similar 2
AT5G62575.2	AT5G62575	245	233	347	172	191	195	4.9605	-0.378986	0.120193	unknown protein
AT4G23050.1	AT4G23050	16	13	24	12	6	2	2.6542	-1.20865	0.121011	PAS domain-containing protein tyrosine kinase family protein
AT5G04080.3	AT5G04080	233	202	303	361	354	265	3.68897	0.593514	0.121731	unknown protein
AT2G17972.1	AT2G17972	206	194	250	226	232	333	5.63304	0.460466	0.121895	unknown protein
AT1G31760.1	AT1G31760	51	52	73	34	25	25	2.63315	-0.879686	0.122065	SWIB/MDM2 domain superfamily protein
AT1G21950.1	AT1G21950	0	7	5	0	0	0	-0.15914	-4.96537	0.122378	unknown protein
AT5G48480.1	AT5G48480	1762	2446	3122	1495	1776	1702	7.7667	-0.375284	0.122378	Lactoylglutathione lyase / glyoxalase I family protein
AT4G11320.1	AT4G11320	307	161	305	119	142	122	6.99599	-0.827919	0.123294	Papain family cysteine protease
AT1G07090.1	AT1G07090	86	108	135	41	66	64	2.47376	-0.764191	0.123394	Protein of unknown function (DUF640)
AT1G12240.1	AT1G12240	312	324	388	389	458	372	5.33945	0.423346	0.123394	Glycosyl hydrolases family 32 protein
AT1G15520.1	AT1G15520	1	2	2	6	7	9	-0.0485092	2.22818	0.123831	pleiotropic drug resistance 12
AT1G67100.1	AT1G67100	1	6	4	0	0	0	0.688375	-4.84866	0.123855	LOB domain-containing protein 40
AT2G46090.1	AT2G46090	28	26	39	17	14	9	2.29585	-1.02728	0.123934	Diacylglycerol kinase family protein
AT4G28510.1	AT4G28510	97	78	127	52	62	58	3.62335	-0.625563	0.124056	prohibitin 1
AT5G10480.1	AT5G10480	256	266	330	186	229	149	5.79119	-0.420713	0.124056	Protein-tyrosine phosphatase-like, PTPLA
AT1G53700.1	AT1G53700	4	4	11	0	2	0	1.69565	-2.84198	0.124794	WAG 1
AT1G55040.1	AT1G55040	98	82	124	69	62	56	3.56161	-0.518239	0.124794	zinc finger (Ran-binding) family protein
AT3G20070.1	AT3G20070	204	184	231	120	129	139	4.57314	-0.499846	0.124866	titan9
AT3G25920.1	AT3G25920	878	632	1082	1120	936	889	7.44505	0.375309	0.124866	ribosomal protein L15
AT5G39960.1	AT5G39960	30	22	21	11	11	7	1.52904	-1.16126	0.124866	GTP binding;GTP binding
AT5G23050.1	AT5G23050	89	68	84	135	111	119	3.13573	0.768096	0.125092	acyl-activating enzyme 17
AT5G53700.1	AT5G53700	4	4	8	0	1	0	0.841434	-3.40633	0.125526	RNA-binding (RRM/RBD/RNP motifs) family protein
AT1G71790.1	AT1G71790	375	338	479	249	258	266	5.54909	-0.442792	0.125699	Subunits of heterodimeric actin filament capping protein Capz superfamily
AT3G02310.1	AT3G02310	245	315	315	179	200	159	5.23772	-0.537677	0.125718	K-box region and MADS-box transcription factor family protein
AT3G10260.3	AT3G10260	292	283	383	227	217	181	5.08423	-0.435633	0.126071	Reticulon family protein
AT3G15990.1	AT3G15990	59	79	62	102	127	82	2.28588	0.786794	0.126222	sulfate transporter 3;4
AT1G47200.1	AT1G47200	1629	1652	2281	1242	1475	1273	7.81133	-0.297114	0.126408	WPP domain protein 2
AT1G30760.1	AT1G30760	18	33	28	41	60	51	2.94594	1.102	0.127679	FAD-binding Berberine family protein
AT1G16080.1	AT1G16080	255	228	272	315	298	293	5.53837	0.433548	0.130124	unknown protein
AT4G37580.1	AT4G37580	67	58	94	42	18	40	2.32298	-0.933723	0.130247	Acyl-CoA N-acyltransferases (NAT) superfamily protein
AT1G77990.1	AT1G77990	88	70	113	124	159	122	2.89258	0.763577	0.130381	STAS domain / Sulfate transporter family
AT4G35080.3	AT4G35080	174	318	315	155	176	182	4.79595	-0.482513	0.131471	high-affinity nickel-transport family protein
AT3G17590.2	AT3G17590	151	143	228	112	114	102	4.26923	-0.480771	0.13173	transcription regulatory protein SNF5, putative (BSH)
AT3G05350.1	AT3G05350	47	39	68	78	70	73	3.25915	0.710038	0.131819	Metallopeptidase M24 family protein
AT4G11920.1	AT4G11920	29	26	46	14	22	14	1.78131	-0.825945	0.131819	cell cycle switch protein 52 A2
AT4G18465.1	AT4G18465	15	15	20	4	7	3	0.488775	-1.63463	0.132529	RNA helicase family protein
AT3G13740.1	AT3G13740	172	122	225	273	145	252	4.74102	0.56637	0.132544	Ribonuclease III family protein
AT4G17770.1	AT4G17770	96	102	118	50	84	50	4.20875	-0.609444	0.132544	trehalose phosphatase/synthase 5
AT5G18310.2	AT5G18310	351	300	493	396	560	530	5.50074	0.567148	0.132544	unknown protein
AT1G53140.1	AT1G53140	50	51	75	20	34	44	3.42209	-0.660193	0.132567	Dynamin related protein 5A
AT5G64530.1	AT5G64530	343	255	413	457	529	451	4.08198	0.692373	0.132567	xylem NAC domain 1
AT1G06420.2	AT1G06420	1216	1125	1467	722	974	820	7.20741	-0.42417	0.132705	unknown protein
AT4G28310.1	AT4G28310	197	212	306	134	143	148	5.56943	-0.562256	0.132705	unknown protein
AT2G45000.1	AT2G45000	74	55	69	34	37	42	3.21571	-0.635053	0.132749	structural constituent of nuclear pore
AT2G32487.1	AT2G32487	5	7	2	13	23	11	0.652217	1.85499	0.13326	unknown protein
AT3G22880.1	AT3G22880	55	17	34	29	9	9	2.98117	-0.993097	0.133795	DNA repair (Rad51) family protein
AT1G08630.1	AT1G08630	58	8	62	183	16	78	3.00008	1.34725	0.133923	threonine aldolase 1
AT2G42240.3	AT2G42240	93	92	136	60	73	57	3.40734	-0.571693	0.134175	RNA-binding (RRM/RBD/RNP motifs) family protein
ATCG00270.1	ATCG00270	70	70	63	114	87	111	3.90429	0.777647	0.134175	photosystem II reaction center protein D
AT1G67620.1	AT1G67620	44	40	72	20	33	30	2.39223	-0.719264	0.134291	Lojap-related protein
AT5G66460.1	AT5G66460	53	88	66	35	36	39	3.74624	-0.754175	0.134761	Glycosyl hydrolase superfamily protein
AT3G55420.1	AT3G55420	290	276	320	332	383	327	6.03397	0.402467	0.136477	unknown protein
AT5G25460.1	AT5G25460	799	1157	1115	1357	1324	1211	8.62382	0.50451	0.137356	Protein of unknown function, DUF642
AT3G48210.1	AT3G48210	34	37	73	22	21	25	2.94191	-0.876726	0.137385	unknown protein
AT3G18660.3	AT3G18660	5	3	5	14	8	12	1.35239	1.53906	0.137581	plant glycogenin-like starch initiation protein 1
AT5G63920.1	AT5G63920	24	35	34	13	17	11	2.09893	-1.00541	0.139784	topoisomerase 3alpha
AT5G02480.1	AT5G02480	286	336	460	204	255	201	5.00329	-0.528307	0.140562	HSP20-like chaperones superfamily protein
AT1G23840.1	AT1G23840	7	3	12	23	24	12	1.53332	1.61202	0.140921	unknown protein
AT1G62380.1	AT1G62380	2612	2548	3412	3618	3353	2989	8.71415	0.396968	0.140961	ACC oxidase 2
AT1G01140.1	AT1G01140	410	300	585	581	534	581	5.5484	0.591509	0.141205	CBL-interacting protein kinase 9
AT1G27950.1	AT1G27950	908	1059	1283	706	790	681	8.07265	-0.40248	0.14144	glycosylphosphatidylinositol-anchored lipid protein transfer 1
AT2G38070.1	AT2G38070	185	214	262	122	139	162	4.65539	-0.466094	0.142303	Protein of unknown function (DUF740)
AT2G37230.1	AT2G37230	156	143	243	91	145	111	4.59699	-0.453396	0.143985	Tetratricopeptide repeat (TPR)-like superfamily protein
AT2G23610.1	AT2G23610	57	43	73	85	73	88	2.79034	0.694601	0.144243	methyl esterase 3
AT1G22160.1	AT1G22160	222	365	423	176	202	162	4.53971	-0.723442	0.144632	Protein of unknown function (DUF581)
AT4G14120.1	AT4G14120	6	7	5	0	1	1	0.253525	-2.80887	0.145424	unknown protein
AT1G12320.1	AT1G12320	782	1155	1228	536	716	507	4.94167	-0.679554	0.145727	Protein of unknown function (DUF1442)
AT2G34790.1	AT2G34790	87	113	123	133	171	140	2.96863	0.628835	0.14639	FAD-binding Berberine family protein
AT3G45680.1	AT3G45680	49	28	55	83	75	58	1.12137	0.897362	0.146555	Major facilitator superfamily protein
AT3G53610.2	AT3G53610	264	287	390	194	227	202	5.28368	-0.412384	0.146555	RAB GTPase homolog 8
ATCG00710.1	ATCG00710	143	98	124	194	159	235	4.59995	0.855561	0.146555	photosystem II reaction center protein H
AT3G29280.1	AT3G29280	219	207	296	135	182	155	5.40752	-0.431501	0.14818	unknown protein
AT1G03780.1	AT1G03780	76	115	143	78	58	56	4.12613	-0.612697	0.149039	targeting protein for XKLP2
AT2G33210.2	AT2G33210	555	568	760	384	461	409	6.77781	-0.406615	0.149879	heat shock protein 60-2
AT1G77765.2	AT1G77765	9	2	10	10	16	21	1.75871	1.33453	0.151078	unknown protein
AT1G06490.1	AT1G06490	135	146	156	149	213	188	2.82915	0.497619	0.151184	glucan synthase-like 7
AT4G15490.1	AT4G15490	11	15	15	19	28	31	2.93353	1.09242	0.152363	UDP-Glycosyltransferase superfamily protein
AT5G47610.1	AT5G47610	23	7	16	30	14	50	2.77157	1.20644	0.152363	RING/U-box superfamily protein
AT3G56290.1	AT3G56290	51	47	87	101	66	99	3.74823	0.723671	0.15285	unknown protein
AT4G01850.1	AT4G01850	473	526	588	612	556	570	6.81896	0.302586	0.153227	S-adenosylmethionine synthetase 2
AT3G07770.1	AT3G07770	351	369	399	182	276	256	5.70442	-0.484656	0.154009	HEAT SHOCK PROTEIN 89.1
AT4G24060.1	AT4G24060	1180	1138	1647	1400	1605	1382	6.24358	0.330535	0.154009	Dof-type zinc finger DNA-binding family protein
AT3G61140.1	AT3G61140	45	44	44	69	53	55	3.80948	0.583898	0.154073	26S proteasome, regulatory subunit Rpn7;Proteasome component (PCI) domain
AT5G48310.2	AT5G48310	51	50	79	27	39	32	3.32582	-0.689341	0.154073	unknown protein
AT5G49120.1	AT5G49120	27	19	30	10	10	12	2.64714	-1.05913	0.154073	Protein of unknown function (DUF581)
AT4G19980.1	AT4G19980	2	6	3	0	0	0	-1.41507	-4.864	0.154191	unknown protein
AT2G38090.1	AT2G38090	141	183	195	170	241	257	4.13907	0.532735	0.156405	Duplicated homeodomain-like superfamily protein
AT4G36930.1	AT4G36930	24	32	59	22	19	11	2.38111	-0.938321	0.158802	basic helix-loop-helix (bHLH) DNA-binding superfamily protein
AT4G20360.1	AT4G20360	10305	8447	12375	12620	11152	10195	11.097	0.309044	0.161706	RAB GTPase homolog E1B
AT5G05060.1	AT5G05060	544	546	694	432	446	350	6.19402	-0.362682	0.162117	Cystatin/monellin superfamily protein
AT1G75270.1	AT1G75270	203	192	205	148	133	118	5.0102	-0.421566	0.162967	dehydroascorbate reductase 2
AT4G34410.1	AT4G34410	92	47	37	20	22	12	2.49953	-1.57257	0.163398	redox responsive transcription factor 1
AT4G24026.1	AT4G24026	47	33	52	83	82	56	2.66215	0.922265	0.163433	unknown protein
AT1G03710.1	AT1G03710	111	196	165	67	125	95	4.2412	-0.560403	0.164102	Cystatin/monellin superfamily protein
AT1G67590.2	AT1G67590	385	347	348	226	269	196	7.8644	-0.488991	0.164623	Remorin family protein
ATCG00080.1	ATCG00080	1368	1243	1688	2367	1724	1816	8.02207	0.640288	0.165253	photosystem II reaction center protein I
AT2G45950.2	AT2G45950	639	601	821	694	744	800	6.48068	0.299075	0.165994	SKP1-like 20
AT1G17990.1	AT1G17990	7	6	8	30	15	19	1.91735	1.77035	0.168203	FMN-linked oxidoreductases superfamily protein
AT2G23170.1	AT2G23170	33	96	91	36	46	17	3.16593	-0.97871	0.168203	Auxin-responsive GH3 family protein
AT5G04740.1	AT5G04740	98	108	136	56	82	65	4.3473	-0.575167	0.16824	ACT domain-containing protein
AT1G05470.1	AT1G05470	184	190	295	109	143	165	4.2965	-0.490871	0.169324	DNAse I-like superfamily protein
AT1G59865.2	AT1G59865	61	14	3	4	3	6	-0.0580127	-2.46444	0.169324	unknown protein
AT4G30920.1	AT4G30920	153	150	258	229	197	205	5.18188	0.362702	0.169669	Cytosol aminopeptidase family protein
AT1G04120.1	AT1G04120	454	415	569	519	563	551	5.64054	0.362771	0.17044	multidrug resistance-associated protein 5
AT1G52140.1	AT1G52140	91	79	119	133	115	133	2.9883	0.583357	0.17044	unknown protein
AT3G13224.2	AT3G13224	56	72	56	83	84	74	3.6384	0.551618	0.170734	RNA-binding (RRM/RBD/RNP motifs) family protein
AT1G28210.2	AT1G28210	49	53	87	20	47	27	2.4341	-0.81527	0.172341	DNAJ heat shock family protein
AT1G03770.3	AT1G03770	24	27	26	14	10	10	1.5588	-1.00212	0.172808	RING 1B
AT1G53645.1	AT1G53645	231	246	327	140	207	195	5.24935	-0.389307	0.172808	hydroxyproline-rich glycoprotein family protein
AT1G53250.1	AT1G53250	141	117	173	188	140	190	5.08321	0.448715	0.173345	unknown protein
AT4G10330.1	AT4G10330	205	236	295	183	157	136	4.6007	-0.448852	0.173345	glycine-rich protein
AT4G20320.1	AT4G20320	91	241	175	68	115	61	5.81168	-0.909358	0.173345	CTP synthase family protein
AT2G34520.1	AT2G34520	130	146	188	94	112	94	4.46595	-0.449518	0.174181	mitochondrial ribosomal protein S14
AT1G66620.1	AT1G66620	63	58	77	35	36	36	3.41634	-0.708156	0.17429	Protein with RING/U-box and TRAF-like domains
AT3G14160.1	AT3G14160	19	22	26	27	38	33	2.82094	0.722728	0.17429	2-oxoglutarate-dependent dioxygenase family protein
AT1G22640.1	AT1G22640	75	62	61	115	77	91	4.24353	0.676724	0.174339	myb domain protein 3
AT3G22310.1	AT3G22310	444	429	589	302	373	297	5.78468	-0.409136	0.174339	putative mitochondrial RNA helicase 1
AT1G18370.1	AT1G18370	116	110	190	56	111	69	4.59806	-0.624909	0.174534	ATP binding microtubule motor family protein
AT4G32230.1	AT4G32230	57	47	107	114	102	77	2.02738	0.681033	0.174758	unknown protein
AT4G32520.1	AT4G32520	281	265	294	190	211	177	5.19324	-0.372231	0.174863	serine hydroxymethyltransferase 3
AT4G02070.2	AT4G02070	478	446	456	237	286	358	6.28937	-0.48911	0.174892	MUTS homolog 6
AT1G24822.1	AT1G24822	1177	1174	1534	960	906	645	6.8049	-0.451341	0.17564	unknown protein
AT1G25097.1	AT1G25097	1177	1174	1534	960	906	645	6.8049	-0.451341	0.17564	unknown protein
AT1G30400.2	AT1G30400	286	227	335	305	347	421	5.13781	0.520547	0.17564	multidrug resistance-associated protein 1
AT4G23990.1	AT4G23990	139	164	184	190	255	185	4.0138	0.540458	0.176203	cellulose synthase like G3
AT5G33370.1	AT5G33370	2267	4407	4175	1373	2297	1836	8.4629	-0.816734	0.176203	GDSL-like Lipase/Acylhydrolase superfamily protein
AT5G63550.1	AT5G63550	2929	3179	3953	1907	2457	2447	8.89787	-0.387664	0.176203	DEK domain-containing chromatin associated protein
AT5G57180.2	AT5G57180	652	488	766	695	726	777	6.82513	0.389877	0.176244	chloroplast import apparatus 2
AT3G22970.2	AT3G22970	347	235	426	472	356	444	5.09218	0.530118	0.176296	Protein of unknown function (DUF506)
AT1G76705.1	AT1G76705	1	2	4	11	12	2	0.253625	1.96486	0.176729	calmodulin binding
AT4G21960.1	AT4G21960	18988	16455	22996	10258	13832	11536	10.5607	-0.536809	0.176729	Peroxidase superfamily protein
AT5G42950.1	AT5G42950	1028	843	1159	1187	917	1243	6.90396	0.323222	0.176729	GYF domain-containing protein
AT3G53750.1	AT3G53750	584	554	725	430	451	439	6.6637	-0.319773	0.176822	actin 3
AT4G33960.1	AT4G33960	62	28	24	104	71	61	3.52184	1.18463	0.17689	unknown protein
AT5G11390.1	AT5G11390	103	96	127	139	123	132	3.74336	0.451716	0.177832	WPP domain-interacting protein 1
AT1G24996.1	AT1G24996	1177	1174	1534	961	908	645	6.80556	-0.449634	0.178951	unknown protein
AT3G15010.1	AT3G15010	125	109	138	71	97	71	3.92447	-0.464274	0.178951	RNA-binding (RRM/RBD/RNP motifs) family protein
AT5G01820.1	AT5G01820	386	617	677	699	933	824	6.38071	0.720915	0.178993	serine/threonine protein kinase 1
AT1G11430.1	AT1G11430	361	262	429	389	380	391	6.10102	0.326062	0.179012	plastid developmental protein DAG, putative
AT1G67350.2	AT1G67350	908	983	1366	782	915	700	7.14852	-0.258495	0.179012	unknown protein
AT1G18550.1	AT1G18550	157	174	205	94	106	122	4.86195	-0.560832	0.17924	ATP binding microtubule motor family protein
AT1G75110.1	AT1G75110	6	20	21	6	8	2	1.34532	-1.35482	0.179542	Nucleotide-diphospho-sugar transferase family protein
AT2G40550.1	AT2G40550	77	82	118	49	61	48	3.57438	-0.624482	0.180044	E2F target gene 1
AT2G40880.1	AT2G40880	39	60	62	22	23	40	3.51302	-0.744574	0.181685	cystatin A
AT4G32460.2	AT4G32460	58	51	60	56	110	72	4.64834	0.659478	0.182318	Protein of unknown function, DUF642
AT3G10280.1	AT3G10280	6	10	10	1	2	3	2.4812	-1.87907	0.182959	3-ketoacyl-CoA synthase 14
AT1G02070.1	AT1G02070	6	4	13	1	3	0	1.08205	-2.22117	0.18337	unknown protein
AT1G23090.1	AT1G23090	54	26	42	94	63	44	3.02881	0.892741	0.18337	sulfate transporter 91
AT2G38500.1	AT2G38500	0	1	1	8	1	6	0.11165	2.8638	0.18452	2-oxoglutarate (2OG) and Fe(II)-dependent oxygenase superfamily protein
AT2G28620.1	AT2G28620	81	80	117	59	47	54	3.8515	-0.609897	0.184542	P-loop containing nucleoside triphosphate hydrolases superfamily protein
AT3G54630.1	AT3G54630	94	84	140	66	67	58	3.99874	-0.545403	0.184564	unknown protein
AT1G27020.1	AT1G27020	43	29	59	20	12	23	2.37309	-1.0478	0.185715	unknown protein
AT5G41610.1	AT5G41610	66	107	108	47	53	45	3.00202	-0.783286	0.186924	cation/H+ exchanger 18
AT4G01460.1	AT4G01460	169	109	186	236	174	150	4.45877	0.456342	0.18795	basic helix-loop-helix (bHLH) DNA-binding superfamily protein
AT1G15690.1	AT1G15690	2080	2041	2571	2662	2395	2480	8.67168	0.347721	0.188003	Inorganic H pyrophosphatase family protein
AT1G69850.1	AT1G69850	374	384	421	265	263	229	4.86286	-0.472992	0.188003	nitrate transporter 1:2
AT2G42400.1	AT2G42400	198	167	235	116	122	155	4.37606	-0.430412	0.188003	vascular plant one zinc finger protein 2
AT4G14010.1	AT4G14010	75	111	107	85	143	139	3.84987	0.49208	0.188003	ralf-like 32
AT1G47240.1	AT1G47240	12	25	34	32	42	34	1.82432	0.787782	0.188628	NRAMP metal ion transporter 2
AT5G52190.1	AT5G52190	122	76	88	143	124	110	4.84621	0.560644	0.188685	Sugar isomerase (SIS) family protein
AT1G58070.1	AT1G58070	111	141	143	170	204	225	3.6838	0.764851	0.189034	unknown protein
AT5G47590.1	AT5G47590	8	0	1	0	0	0	2.52323	-4.57002	0.189771	Heat shock protein HSP20/alpha crystallin family
AT1G11800.1	AT1G11800	64	72	76	40	40	50	3.34085	-0.530698	0.190121	endonuclease/exonuclease/phosphatase family protein
AT4G03415.1	AT4G03415	149	164	217	199	231	193	4.34673	0.413267	0.190121	Protein phosphatase 2C family protein
AT1G01350.1	AT1G01350	236	236	329	187	178	175	4.83609	-0.385525	0.190556	Zinc finger (CCCH-type/C3HC4-type RING finger) family protein
AT5G24420.1	AT5G24420	59	158	84	43	55	42	5.88074	-0.975361	0.190556	6-phosphogluconolactonase 5
AT3G58650.1	AT3G58650	335	317	430	246	264	222	5.70348	-0.384413	0.190589	unknown protein
AT5G03020.1	AT5G03020	3	0	2	9	5	5	-0.779964	2.02496	0.190589	Galactose oxidase/kelch repeat superfamily protein
AT5G08280.1	AT5G08280	643	471	750	754	675	640	7.20796	0.33558	0.190589	hydroxymethylbilane synthase
AT1G08880.1	AT1G08880	634	571	874	511	475	432	6.40369	-0.363535	0.191257	Histone superfamily protein
AT5G07220.1	AT5G07220	94	91	147	143	154	130	4.25741	0.553019	0.191257	BCL-2-associated athanogene 3
AT5G24760.2	AT5G24760	17	8	22	31	23	24	2.56543	0.91464	0.191257	GroES-like zinc-binding dehydrogenase family protein
AT5G44870.1	AT5G44870	5	15	11	24	16	27	1.7719	1.27047	0.191257	Disease resistance protein (TIR-NBS-LRR class) family
AT3G16400.2	AT3G16400	359	683	739	336	368	310	5.90816	-0.635525	0.192674	nitrile specifier protein 1
AT4G01800.2	AT4G01800	428	364	605	547	406	664	5.99785	0.406808	0.193267	Albino or Glassy Yellow 1
AT5G51340.1	AT5G51340	96	74	83	61	43	50	3.28431	-0.546128	0.193314	Tetratricopeptide repeat (TPR)-like superfamily protein
AT1G55540.1	AT1G55540	68	67	86	30	41	48	2.95661	-0.714837	0.193585	Nuclear pore complex protein
AT3G52630.2	AT3G52630	77	51	84	37	41	43	3.22468	-0.626251	0.193585	Nucleic acid-binding, OB-fold-like protein
AT5G20010.1	AT5G20010	913	949	1197	646	879	657	6.93009	-0.313254	0.193585	RAS-related nuclear protein-1
AT2G28410.1	AT2G28410	221	185	241	146	131	139	4.32456	-0.461875	0.193777	unknown protein
AT2G01330.1	AT2G01330	5	5	8	1	1	1	-0.16821	-2.27327	0.193892	nucleotide binding
AT3G18890.1	AT3G18890	281	201	369	338	311	321	5.73645	0.381756	0.193892	NAD(P)-binding Rossmann-fold superfamily protein
AT4G12620.1	AT4G12620	139	139	169	69	106	108	4.4235	-0.486053	0.193892	origin of replication complex 1B
AT1G80180.1	AT1G80180	160	145	270	388	194	321	5.3902	0.86228	0.194739	unknown protein
AT4G30110.1	AT4G30110	172	134	200	219	305	242	3.17694	0.776346	0.194742	heavy metal atpase 2
AT1G74900.1	AT1G74900	32	19	42	45	43	45	2.29375	0.70315	0.195964	Pentatricopeptide repeat (PPR) superfamily protein
AT3G53420.1	AT3G53420	1318	1178	1590	1987	1630	1913	7.88118	0.616757	0.195964	plasma membrane intrinsic protein 2A
AT3G12940.1	AT3G12940	24	42	41	14	15	16	2.03674	-1.07282	0.196131	2-oxoglutarate (2OG) and Fe(II)-dependent oxygenase superfamily protein
AT5G56260.1	AT5G56260	99	153	162	92	97	70	3.95144	-0.502672	0.196165	Ribonuclease E inhibitor RraA/Dimethylmenaquinone methyltransferase
AT4G09510.1	AT4G09510	25	21	34	12	16	11	5.02654	-0.850145	0.196567	cytosolic invertase 2
AT1G63160.1	AT1G63160	36	47	59	16	38	15	2.65872	-0.861348	0.196892	replication factor C 2
AT2G24580.1	AT2G24580	220	147	249	244	273	258	4.7426	0.515761	0.196892	FAD-dependent oxidoreductase family protein
AT1G65980.2	AT1G65980	896	892	1354	733	796	709	6.7346	-0.299749	0.196922	thioredoxin-dependent peroxidase 1
AT3G04630.3	AT3G04630	135	143	161	90	80	100	4.40675	-0.52895	0.196922	WVD2-like 1
AT3G47510.1	AT3G47510	35	29	46	69	61	45	1.7994	0.853227	0.197808	unknown protein
AT1G59660.1	AT1G59660	73	76	81	40	65	30	2.78264	-0.60096	0.197828	Nucleoporin autopeptidase
AT4G05380.1	AT4G05380	2	3	2	12	9	5	-0.717265	2.00412	0.197828	P-loop containing nucleoside triphosphate hydrolases superfamily protein
AT4G32295.1	AT4G32295	63	56	82	35	44	33	2.31611	-0.660971	0.197828	unknown protein
AT1G27370.2	AT1G27370	61	48	92	97	92	84	3.95046	0.635948	0.197856	squamosa promoter binding protein-like 10
AT3G17100.2	AT3G17100	416	492	585	620	620	538	5.79366	0.427363	0.197856	sequence-specific DNA binding transcription factors
AT3G44735.1	AT3G44735	557	527	849	666	926	777	5.87259	0.484948	0.197856	PHYTOSULFOKINE 3 PRECURSOR
AT1G42480.1	AT1G42480	102	92	112	73	58	63	3.79961	-0.481851	0.1983	unknown protein
AT1G72600.2	AT1G72600	747	622	844	1070	883	791	7.10875	0.487851	0.198445	hydroxyproline-rich glycoprotein family protein
AT2G31220.1	AT2G31220	0	3	7	0	0	0	3.16524	-4.68795	0.198687	basic helix-loop-helix (bHLH) DNA-binding superfamily protein
AT3G55660.1	AT3G55660	146	111	180	98	86	82	5.0904	-0.529504	0.198687	ROP (rho of plants) guanine nucleotide exchange factor 6
AT2G45660.1	AT2G45660	1549	2208	2556	2070	3014	2586	7.80933	0.455342	0.198819	AGAMOUS-like 20
AT1G26210.1	AT1G26210	17	27	35	16	10	7	2.23034	-1.06471	0.199131	SOB five-like 1
AT3G26810.1	AT3G26810	218	155	225	132	148	130	4.76712	-0.367669	0.199131	auxin signaling F-box 2
AT2G26440.1	AT2G26440	28	46	28	18	15	9	2.17093	-1.13129	0.199741	Plant invertase/pectin methylesterase inhibitor superfamily
AT3G11630.1	AT3G11630	365	316	432	489	424	372	6.42615	0.386126	0.199741	Thioredoxin superfamily protein
AT3G55380.2	AT3G55380	543	495	665	409	462	361	6.3143	-0.289889	0.199741	ubiquitin-conjugating enzyme 14
AT1G08130.1	AT1G08130	221	258	323	111	208	171	5.17811	-0.535208	0.201223	DNA ligase 1
AT1G35710.1	AT1G35710	82	34	72	132	246	74	3.21124	1.43916	0.201223	Protein kinase family protein with leucine-rich repeat domain
AT1G54080.2	AT1G54080	704	692	835	537	564	519	6.32877	-0.289487	0.201457	oligouridylate-binding protein 1A
AT1G67090.2	AT1G67090	40733	34927	52427	53169	45500	52599	13.2632	0.427728	0.202064	ribulose bisphosphate carboxylase small chain 1A
AT4G37690.1	AT4G37690	3	5	10	1	1	0	-0.017121	-2.76109	0.202064	Galactosyl transferase GMA12/MNN10 family protein
AT5G66010.1	AT5G66010	83	91	120	77	43	58	3.21979	-0.539807	0.202647	RNA-binding (RRM/RBD/RNP motifs) family protein
AT3G01516.1	AT3G01516	3	6	4	0	0	1	1.0826	-3.13951	0.203532	unknown protein
AT1G69800.1	AT1G69800	204	167	288	228	282	224	5.03907	0.343441	0.203649	Cystathionine beta-synthase (CBS) protein
AT2G02780.1	AT2G02780	26	37	36	19	15	16	3.08214	-0.80819	0.203649	Leucine-rich repeat protein kinase family protein
ATCG00490.1	ATCG00490	770	610	664	1187	952	816	7.04657	0.690463	0.203649	ribulose-bisphosphate carboxylases
AT5G27410.2	AT5G27410	58	33	59	28	28	26	3.02683	-0.687641	0.204873	D-aminoacid aminotransferase-like PLP-dependent enzymes superfamily protein
AT5G04140.2	AT5G04140	749	700	978	966	949	908	7.10995	0.400323	0.205957	glutamate synthase 1
AT2G46950.1	AT2G46950	3	13	4	0	1	1	-0.86943	-3.00132	0.206133	cytochrome P450, family 709, subfamily B, polypeptide 2
AT4G28230.1	AT4G28230	477	358	456	219	364	256	5.98288	-0.457224	0.206133	unknown protein
AT1G72610.1	AT1G72610	1121	958	1207	1572	1284	1235	7.70907	0.488746	0.207187	germin-like protein 1
AT2G02800.1	AT2G02800	194	175	227	104	136	126	4.7897	-0.529001	0.207765	protein kinase 2B
AT1G36370.1	AT1G36370	27	22	23	48	40	49	2.57027	1.08788	0.207863	serine hydroxymethyltransferase 7
AT1G48620.1	AT1G48620	768	797	1059	647	642	621	6.8321	-0.277126	0.209334	high mobility group A5
AT2G04038.1	AT2G04038	4	4	5	0	1	0	-1.60123	-3.13216	0.209334	basic leucine-zipper 48
AT3G56070.2	AT3G56070	268	299	404	225	222	198	5.73605	-0.406281	0.209334	rotamase cyclophilin 2
AT5G09590.1	AT5G09590	1405	1421	1749	901	1162	1033	7.576	-0.39135	0.209334	mitochondrial HSO70 2
AT5G22770.2	AT5G22770	96	107	178	149	141	182	4.11977	0.506075	0.209334	alpha-adaptin
AT2G32840.1	AT2G32840	57	56	77	34	43	33	2.59708	-0.607264	0.209362	proline-rich family protein
AT4G18020.6	AT4G18020	667	644	903	455	589	545	6.25992	-0.297109	0.209362	CheY-like two-component responsive regulator family protein
AT4G16380.1	AT4G16380	128	136	162	183	179	174	4.84453	0.505392	0.210461	Heavy metal transport/detoxification superfamily protein
AT5G17280.1	AT5G17280	40	60	58	75	61	78	3.26295	0.608958	0.210461	unknown protein
AT2G03710.2	AT2G03710	206	159	275	262	296	247	4.70717	0.521275	0.210611	K-box region and MADS-box transcription factor family protein
AT4G11140.1	AT4G11140	30	31	41	14	23	11	1.47057	-0.905072	0.21082	cytokinin response factor 1
AT5G45275.1	AT5G45275	35	49	70	21	32	22	2.39417	-0.84646	0.210908	Major facilitator superfamily protein
AT5G08130.6	AT5G08130	250	280	325	178	203	190	4.73527	-0.409711	0.211338	basic helix-loop-helix (bHLH) DNA-binding superfamily protein
AT5G21105.2	AT5G21105	591	616	698	732	847	627	6.66218	0.378559	0.211338	Plant L-ascorbate oxidase
AT5G14740.3	AT5G14740	53	53	54	124	61	49	5.77113	0.716391	0.211355	carbonic anhydrase 2
AT3G50620.1	AT3G50620	120	143	163	96	94	82	3.86929	-0.472484	0.212278	P-loop containing nucleoside triphosphate hydrolases superfamily protein
AT1G23100.1	AT1G23100	90	87	94	54	58	52	3.75347	-0.555584	0.212561	GroES-like family protein
AT1G66140.1	AT1G66140	137	108	217	83	89	63	4.29414	-0.770176	0.212561	zinc finger protein 4
AT1G02800.1	AT1G02800	16	12	25	5	7	9	2.64523	-1.1368	0.212809	cellulase 2
AT2G02880.1	AT2G02880	123	113	158	77	97	87	3.98281	-0.414186	0.212809	mucin-related
AT2G03530.1	AT2G03530	7	8	9	18	19	12	2.10709	1.19175	0.212809	ureide permease 2
AT2G22360.1	AT2G22360	222	193	238	263	246	251	5.20804	0.391374	0.212809	DNAJ heat shock family protein
AT3G14100.1	AT3G14100	1302	1107	1575	900	1089	815	6.59394	-0.328116	0.212995	RNA-binding (RRM/RBD/RNP motifs) family protein
AT1G54510.1	AT1G54510	209	187	261	153	147	118	4.43506	-0.471794	0.212998	NIMA-related serine/threonine kinase 1
AT3G26680.1	AT3G26680	32	24	24	7	16	12	1.46301	-1.0255	0.213679	DNA repair metallo-beta-lactamase family protein
AT2G47230.1	AT2G47230	425	438	573	318	364	313	5.35182	-0.350705	0.214494	DOMAIN OF UNKNOWN FUNCTION 724 6
AT2G37540.1	AT2G37540	8	26	7	28	26	25	2.91039	1.07691	0.215002	NAD(P)-binding Rossmann-fold superfamily protein
AT1G77660.1	AT1G77660	177	221	275	158	135	133	4.38171	-0.478006	0.216224	Histone H3 K4-specific methyltransferase SET7/9 family protein
AT3G06010.1	AT3G06010	1126	1091	1396	783	900	942	7.36143	-0.285244	0.217353	Homeotic gene regulator
AT3G59060.1	AT3G59060	20	20	19	45	28	27	4.14586	0.925552	0.220174	phytochrome interacting factor 3-like 6
AT3G06080.2	AT3G06080	169	122	188	237	186	216	4.31893	0.598955	0.220422	Plant protein of unknown function (DUF828)
AT1G52270.1	AT1G52270	27	37	47	15	23	20	3.44559	-0.752461	0.22238	unknown protein
AT4G18780.1	AT4G18780	216	222	191	300	326	284	4.69868	0.680046	0.22238	cellulose synthase family protein
AT5G15920.1	AT5G15920	164	163	234	128	106	115	5.20484	-0.498116	0.22238	structural maintenance of chromosomes 5
AT4G30560.2	AT4G30560	87	121	146	49	84	72	3.15314	-0.609591	0.223588	cyclic nucleotide gated channel 9
ATCG00020.1	ATCG00020	795	680	719	1485	984	1263	7.45386	0.92718	0.223815	photosystem II reaction center protein A
AT4G32270.1	AT4G32270	49	46	60	25	31	23	2.02075	-0.793571	0.223914	Ubiquitin-like superfamily protein
AT1G78110.1	AT1G78110	2618	2595	2600	2808	3430	3343	7.56755	0.449469	0.22405	unknown protein
AT4G01030.1	AT4G01030	61	67	88	116	92	87	2.90071	0.631118	0.224864	pentatricopeptide (PPR) repeat-containing protein
ATCG00190.1	ATCG00190	794	666	695	979	862	1166	7.44294	0.638337	0.225036	RNA polymerase subunit beta
AT5G17160.1	AT5G17160	418	331	523	245	315	312	6.18805	-0.360006	0.22517	unknown protein
AT3G43430.1	AT3G43430	57	71	97	110	102	107	2.56653	0.689939	0.225853	RING/U-box superfamily protein
AT3G02875.1	AT3G02875	49	63	79	40	25	39	3.08796	-0.69182	0.226434	Peptidase M20/M25/M40 family protein
AT3G22968.1	AT3G22968	366	257	439	494	369	456	5.14579	0.503968	0.227263	conserved peptide upstream open reading frame 59
AT1G70895.1	AT1G70895	11	15	16	5	3	2	0.586298	-1.8605	0.227298	CLAVATA3/ESR-RELATED 17
AT1G71420.1	AT1G71420	8	14	29	4	10	3	0.863581	-1.359	0.227298	Tetratricopeptide repeat (TPR)-like superfamily protein
AT2G18650.1	AT2G18650	6	2	2	0	0	0	0.30314	-4.73156	0.227298	RING/U-box superfamily protein
AT3G04960.3	AT3G04960	379	397	502	269	292	298	5.66417	-0.395847	0.227754	Domain of unknown function (DUF3444)
AT1G33610.1	AT1G33610	1	1	3	12	7	5	0.747542	2.37751	0.227923	Leucine-rich repeat (LRR) family protein
AT5G55190.1	AT5G55190	413	441	497	290	340	326	6.1977	-0.329621	0.228871	RAN GTPase 3
ATCG00890.1	ATCG00890	38	34	26	64	50	41	2.92421	0.812839	0.228871	NADH-Ubiquinone/plastoquinone (complex I) protein
ATCG01250.1	ATCG01250	38	34	26	64	50	41	2.92421	0.81284	0.228871	NADH-Ubiquinone/plastoquinone (complex I) protein
AT2G45400.1	AT2G45400	52	63	82	110	69	82	2.843	0.589751	0.229445	NAD(P)-binding Rossmann-fold superfamily protein
AT3G12145.1	AT3G12145	2581	2844	4011	1848	2422	1773	7.89478	-0.457672	0.229576	Leucine-rich repeat (LRR) family protein
AT5G47640.1	AT5G47640	276	356	395	164	250	195	4.56255	-0.585058	0.229576	nuclear factor Y, subunit B2
AT1G14345.1	AT1G14345	158	179	180	238	201	236	5.15812	0.549362	0.229685	NAD(P)-linked oxidoreductase superfamily protein
AT5G27350.1	AT5G27350	9	13	13	36	28	24	1.27811	1.49124	0.230444	Major facilitator superfamily protein
AT4G40000.1	AT4G40000	18	17	19	4	10	7	1.83602	-1.17936	0.231131	S-adenosyl-L-methionine-dependent methyltransferases superfamily protein
AT1G63780.1	AT1G63780	80	53	80	45	33	47	4.01402	-0.588642	0.231951	Ribosomal RNA processing Brix domain protein
AT1G61450.1	AT1G61450	28	18	25	14	9	9	2.42645	-0.966665	0.233507	unknown protein
AT1G52000.1	AT1G52000	109	70	144	136	182	136	4.66029	0.685848	0.233579	Mannose-binding lectin superfamily protein
AT4G25720.3	AT4G25720	46	38	69	23	39	23	2.79695	-0.658887	0.234047	glutaminyl cyclase
AT2G03980.1	AT2G03980	2	2	0	5	8	5	1.98295	2.22425	0.235802	GDSL-like Lipase/Acylhydrolase superfamily protein
AT3G61580.1	AT3G61580	969	781	1101	1265	897	1080	7.69593	0.366886	0.235802	Fatty acid/sphingolipid desaturase
AT3G48710.1	AT3G48710	1470	1417	1946	1048	1205	1209	7.30654	-0.300358	0.236215	DEK domain-containing chromatin associated protein
AT5G22640.1	AT5G22640	7654	5758	8675	8028	6823	8334	10.1093	0.253584	0.236215	MORN (Membrane Occupation and Recognition Nexus) repeat-containing protein
AT4G37100.1	AT4G37100	30	33	49	17	16	17	1.93627	-0.969885	0.237822	Pyridoxal phosphate (PLP)-dependent transferases superfamily protein
AT5G15240.2	AT5G15240	18	6	14	28	27	30	0.882155	1.33356	0.237822	Transmembrane amino acid transporter family protein
AT5G43250.1	AT5G43250	2	2	4	10	5	7	0.0529754	1.59373	0.237822	nuclear factor Y, subunit C13
AT5G63950.1	AT5G63950	196	253	298	135	214	161	5.15871	-0.375695	0.237822	chromatin remodeling 24
AT3G21560.1	AT3G21560	22	25	16	12	9	8	4.44607	-0.948519	0.238263	UDP-Glycosyltransferase superfamily protein
AT4G34380.1	AT4G34380	1	0	1	3	8	3	-0.582056	2.75998	0.238263	Transducin/WD40 repeat-like superfamily protein
AT1G63470.1	AT1G63470	281	274	372	211	202	210	4.91848	-0.391957	0.239008	AT hook motif DNA-binding family protein
AT4G34940.1	AT4G34940	6	3	2	0	1	0	0.106691	-2.90363	0.239008	armadillo repeat only 1
AT5G10760.1	AT5G10760	8	5	10	23	47	20	1.95656	2.13413	0.239008	Eukaryotic aspartyl protease family protein
AT2G38670.1	AT2G38670	169	183	250	125	136	135	5.00303	-0.420984	0.239114	phosphorylethanolamine cytidylyltransferase 1
AT3G56910.1	AT3G56910	853	767	1265	1069	950	1032	7.86624	0.275608	0.24009	plastid-specific 50S ribosomal protein 5
AT3G15710.1	AT3G15710	230	238	302	173	193	154	4.8825	-0.389501	0.240872	Peptidase S24/S26A/S26B/S26C family protein
AT3G05165.1	AT3G05165	18	28	21	44	42	27	2.68437	0.910292	0.24181	Major facilitator superfamily protein
AT3G27020.1	AT3G27020	88	86	113	64	59	57	4.05207	-0.493389	0.24194	YELLOW STRIPE like 6
AT5G42500.1	AT5G42500	12	13	26	4	6	5	-0.0418755	-1.5386	0.24214	Disease resistance-responsive (dirigent-like protein) family protein
AT5G27330.1	AT5G27330	2067	1904	2163	1027	1305	1514	8.35235	-0.509711	0.242785	Prefoldin chaperone subunit family protein
AT1G13470.1	AT1G13470	38	35	58	87	216	70	1.76917	1.69068	0.243582	Protein of unknown function (DUF1262)
AT2G33810.1	AT2G33810	4213	3478	5125	4601	4692	5169	8.51313	0.357583	0.244194	squamosa promoter binding protein-like 3
AT1G17745.1	AT1G17745	1721	2032	2286	1009	1828	1098	8.60181	-0.45374	0.244427	D-3-phosphoglycerate dehydrogenase
AT1G62040.2	AT1G62040	73	84	119	68	51	50	3.83366	-0.520696	0.244427	Ubiquitin-like superfamily protein
AT3G63510.1	AT3G63510	36	28	47	16	23	18	2.55543	-0.774409	0.244427	FMN-linked oxidoreductases superfamily protein
AT1G76300.1	AT1G76300	239	213	301	166	188	165	5.11839	-0.356635	0.245648	snRNP core protein SMD3
AT1G80290.1	AT1G80290	254	253	263	145	195	187	4.83825	-0.384015	0.245738	Nucleotide-diphospho-sugar transferases superfamily protein
AT4G02110.1	AT4G02110	144	155	219	107	118	97	4.89869	-0.500523	0.247613	transcription coactivators
AT1G02065.2	AT1G02065	35	10	21	4	9	11	3.21492	-1.27796	0.248463	squamosa promoter binding protein-like 8
AT2G05380.1	AT2G05380	20	1	40	61	10	47	4.86898	1.21398	0.248478	glycine-rich protein 3 short isoform
AT2G17320.1	AT2G17320	50	26	67	18	34	26	2.8042	-0.680387	0.248478	Uncharacterised conserved protein (UCP030210)
AT3G06030.1	AT3G06030	69	57	82	37	47	38	3.07696	-0.589557	0.248478	NPK1-related protein kinase 3
AT5G57660.1	AT5G57660	118	78	77	220	101	164	4.13987	0.982466	0.248478	CONSTANS-like 5
AT1G61000.1	AT1G61000	138	110	183	70	96	101	4.26111	-0.503058	0.248889	unknown protein
AT1G69280.1	AT1G69280	58	74	58	40	29	39	3.33593	-0.654931	0.249033	unknown protein
AT5G64670.1	AT5G64670	354	402	461	231	314	302	5.90285	-0.351903	0.250155	Ribosomal protein L18e/L15 superfamily protein
ATCG00130.1	ATCG00130	571	449	516	878	690	763	6.54564	0.765162	0.25061	ATPase, F0 complex, subunit B/B', bacterial/chloroplast
AT1G79390.1	AT1G79390	65	72	89	57	47	32	3.23018	-0.553429	0.251608	unknown protein
AT5G23570.1	AT5G23570	1286	1258	1646	918	956	1082	6.81846	-0.324793	0.25291	XS domain-containing protein / XS zinc finger domain-containing protein-related
AT5G22790.1	AT5G22790	62	56	75	34	32	44	3.16658	-0.630711	0.25342	reticulata-related 1
AT4G23410.1	AT4G23410	25	22	25	48	29	46	1.6964	0.941915	0.255493	tetraspanin5
AT1G79220.1	AT1G79220	19	16	28	8	10	9	1.00943	-1.02688	0.25646	Mitochondrial transcription termination factor family protein
AT1G21560.1	AT1G21560	131	131	175	83	104	108	4.26931	-0.387353	0.258216	unknown protein
AT4G08290.2	AT4G08290	4	19	6	2	1	4	1.24089	-1.86243	0.258216	nodulin MtN21 /EamA-like transporter family protein
AT3G13750.1	AT3G13750	8668	5468	9505	16492	6825	10415	9.00397	0.708007	0.259652	beta galactosidase 1
AT3G19515.2	AT3G19515	28	36	37	17	16	23	4.82691	-0.670922	0.259652	unknown protein
AT5G03880.1	AT5G03880	105	104	150	86	68	77	4.02557	-0.451085	0.261068	Thioredoxin family protein
AT3G03000.1	AT3G03000	0	1	0	2	5	5	-0.0264315	3.30762	0.261476	EF hand calcium-binding protein family
AT1G26940.1	AT1G26940	62	58	109	32	36	60	3.33092	-0.638611	0.261515	Cyclophilin-like peptidyl-prolyl cis-trans isomerase family protein
AT2G41200.1	AT2G41200	141	114	165	179	173	149	3.65388	0.433939	0.261848	unknown protein
AT3G03090.1	AT3G03090	29	17	39	40	38	42	2.25662	0.684622	0.262145	vacuolar glucose transporter 1
AT1G06760.1	AT1G06760	2720	2982	3816	1962	2749	1993	8.40882	-0.329642	0.263125	winged-helix DNA-binding transcription factor family protein
AT3G55930.1	AT3G55930	3	0	0	3	11	5	-0.523603	2.66029	0.263125	Pre-mRNA-splicing factor 3
AT1G75730.2	AT1G75730	58	69	91	43	29	53	2.90861	-0.61631	0.26368	unknown protein
AT1G08540.1	AT1G08540	521	484	690	618	612	621	6.81292	0.31036	0.263813	RNApolymerase sigma subunit 2
AT1G18630.1	AT1G18630	491	453	615	330	447	320	6.10922	-0.330311	0.263813	glycine-rich RNA-binding protein 6
AT1G33102.1	AT1G33102	1	0	5	7	8	5	-0.0671165	1.87207	0.263813	unknown protein
AT1G33800.1	AT1G33800	30	38	28	58	79	34	2.48462	0.97526	0.263813	Protein of unknown function (DUF579)
AT1G56510.1	AT1G56510	2	5	10	17	12	13	3.4825	1.48927	0.263813	Disease resistance protein (TIR-NBS-LRR class)
AT2G37220.1	AT2G37220	1263	1083	1517	1496	1317	1457	8.13091	0.325663	0.263813	RNA-binding (RRM/RBD/RNP motifs) family protein
AT3G11680.1	AT3G11680	83	69	91	96	103	96	1.33683	0.455095	0.263813	Aluminium activated malate transporter family protein
AT3G14930.2	AT3G14930	341	266	431	416	362	402	6.29771	0.373392	0.263813	Uroporphyrinogen decarboxylase
AT3G29185.2	AT3G29185	58	38	53	73	59	63	3.39584	0.562674	0.263813	Domain of unknown function (DUF3598)
AT3G58850.1	AT3G58850	179	145	184	105	83	110	5.50112	-0.595838	0.263813	phy rapidly regulated 2
AT3G61550.1	AT3G61550	33	34	51	19	15	25	2.89635	-0.809111	0.263813	RING/U-box superfamily protein
AT5G02800.1	AT5G02800	153	139	175	111	90	81	3.64058	-0.552284	0.263813	Protein kinase superfamily protein
AT5G38690.1	AT5G38690	308	300	419	170	266	216	5.72545	-0.475453	0.263813	Zinc-finger domain of monoamine-oxidase A repressor R1 protein
AT5G40630.1	AT5G40630	10	31	8	29	35	28	2.38472	1.02923	0.263813	Ubiquitin-like superfamily protein
AT5G67270.1	AT5G67270	64	67	88	33	53	34	3.40271	-0.689222	0.263813	end binding protein 1C
AT1G63380.1	AT1G63380	8	11	14	2	4	3	0.256725	-1.65561	0.265143	NAD(P)-binding Rossmann-fold superfamily protein
AT4G22010.1	AT4G22010	149	144	198	115	113	98	5.27707	-0.40972	0.265143	SKU5 similar 4
AT2G43770.1	AT2G43770	76	73	99	44	54	50	3.38839	-0.56453	0.268219	Transducin/WD40 repeat-like superfamily protein
AT3G21465.2	AT3G21465	40	57	64	36	15	35	2.83389	-0.722054	0.269366	unknown protein
AT2G27960.1	AT2G27960	633	563	686	407	506	381	6.11409	-0.372433	0.270112	cyclin-dependent kinase-subunit 1
AT1G10060.3	AT1G10060	85	112	118	62	60	62	3.30305	-0.603809	0.27052	branched-chain amino acid transaminase 1
AT2G19520.1	AT2G19520	1099	1185	1513	850	1058	869	7.61887	-0.274365	0.27052	Transducin family protein / WD-40 repeat family protein
AT2G15050.1	AT2G15050	212	197	203	266	246	258	4.95641	0.49248	0.270592	lipid transfer protein
AT4G35110.1	AT4G35110	73	108	141	197	131	172	3.72177	0.826243	0.271256	Arabidopsis phospholipase-like protein (PEARLI 4) family
AT5G12930.1	AT5G12930	35	42	49	27	24	14	2.38312	-0.775689	0.271256	unknown protein
AT1G47278.1	AT1G47278	122	126	157	79	93	96	4.68979	-0.418678	0.271653	unknown protein
AT3G53460.2	AT3G53460	208	137	264	366	209	204	5.19081	0.554231	0.272075	chloroplast RNA-binding protein 29
ATCG00050.1	ATCG00050	31	22	28	47	43	45	2.61641	0.904749	0.272257	ribosomal protein S16
AT1G47970.1	AT1G47970	5528	4786	6105	3155	3797	4069	9.39015	-0.403765	0.27276	unknown protein
AT1G72260.1	AT1G72260	7	34	10	9	6	2	8.8526	-1.44909	0.27276	thionin 2.1
AT2G37090.1	AT2G37090	9	14	6	14	25	19	0.671307	1.13903	0.27276	Nucleotide-diphospho-sugar transferases superfamily protein
AT2G38800.1	AT2G38800	1118	999	1426	1205	1413	1259	6.55525	0.311099	0.27276	Plant calmodulin-binding protein-related
AT1G62480.1	AT1G62480	24928	16122	32877	25529	29380	32661	11.8075	0.446131	0.273613	Vacuolar calcium-binding protein-related
AT3G16500.1	AT3G16500	2546	1980	2898	3186	2780	2478	6.95948	0.366892	0.273613	phytochrome-associated protein 1
AT3G46220.2	AT3G46220	130	97	162	61	94	67	3.6878	-0.623676	0.273613	unknown protein
AT1G52030.2	AT1G52030	2617	3499	5129	1772	2679	1913	8.82343	-0.628084	0.273658	myrosinase-binding protein 2
AT3G01120.1	AT3G01120	1034	1044	1187	591	902	752	6.89941	-0.376026	0.27397	Pyridoxal phosphate (PLP)-dependent transferases superfamily protein
AT2G20635.1	AT2G20635	30	23	46	8	30	12	2.22458	-0.794156	0.275169	ATP binding;protein kinases;protein serine/threonine kinases
AT1G74870.1	AT1G74870	1	4	9	8	8	19	2.67269	1.50488	0.275558	RING/U-box superfamily protein
AT3G22420.1	AT3G22420	148	246	211	143	131	106	4.49254	-0.511192	0.275558	with no lysine (K) kinase 2
AT3G53540.1	AT3G53540	426	447	615	289	411	319	5.57103	-0.36505	0.275558	unknown protein
AT3G59040.2	AT3G59040	304	218	419	391	308	344	5.81018	0.346029	0.275558	Tetratricopeptide repeat (TPR)-like superfamily protein
AT4G14746.1	AT4G14746	7	6	6	14	24	6	1.79105	1.35806	0.275558	unknown protein
ATCG00300.1	ATCG00300	639	480	579	862	836	676	6.7691	0.646776	0.275558	YCF9
AT4G27450.1	AT4G27450	110	59	173	361	108	237	4.13568	1.27892	0.276378	Aluminium induced protein with YGL and LRDR motifs
AT2G21385.3	AT2G21385	538	394	669	616	598	539	6.47879	0.319783	0.276725	unknown protein
AT2G45840.1	AT2G45840	2	4	2	0	0	0	0.384767	-4.4065	0.277044	Arabidopsis thaliana protein of unknown function (DUF821)
AT3G56100.1	AT3G56100	77	58	85	33	59	38	3.73647	-0.58152	0.277044	meristematic receptor-like kinase
AT4G39730.1	AT4G39730	917	828	1286	632	810	613	7.4131	-0.373253	0.277044	Lipase/lipooxygenase, PLAT/LH2 family protein
AT2G13360.1	AT2G13360	2036	1534	2578	3314	1926	2188	8.51131	0.468616	0.277615	alanine:glyoxylate aminotransferase
AT4G30935.1	AT4G30935	320	341	465	248	270	269	4.45105	-0.333821	0.277615	WRKY DNA-binding protein 32
AT4G37490.1	AT4G37490	22	20	25	13	8	9	2.13524	-0.974067	0.277615	CYCLIN B1;1
AT2G43810.2	AT2G43810	135	134	171	82	126	79	4.32942	-0.441559	0.277705	Small nuclear ribonucleoprotein family protein
AT2G30520.3	AT2G30520	820	634	984	1219	1091	1122	7.55059	0.679413	0.277942	Phototropic-responsive NPH3 family protein
AT2G43780.2	AT2G43780	141	154	220	100	117	122	4.53152	-0.417502	0.277942	unknown protein
AT3G55610.2	AT3G55610	26	21	44	51	37	43	1.98776	0.720464	0.277942	delta 1-pyrroline-5-carboxylate synthase 2
AT4G21480.1	AT4G21480	14	23	26	3	11	15	3.27067	-0.932648	0.277942	sugar transporter protein 12
AT5G25170.1	AT5G25170	71	88	99	41	51	54	3.42285	-0.647158	0.277942	PPPDE putative thiol peptidase family protein
AT3G25640.1	AT3G25640	3	4	4	12	5	12	3.58355	1.54351	0.278137	Protein of unknown function, DUF617
AT2G21300.2	AT2G21300	440	467	590	381	371	336	6.01684	-0.282432	0.278307	ATP binding microtubule motor family protein
AT1G70940.1	AT1G70940	347	391	395	460	468	457	6.38033	0.451783	0.278811	Auxin efflux carrier family protein
AT2G21060.1	AT2G21060	1061	958	1103	753	858	596	6.89883	-0.336352	0.278811	glycine-rich protein 2B
AT5G65660.1	AT5G65660	279	202	286	385	306	314	4.14019	0.566882	0.278811	hydroxyproline-rich glycoprotein family protein
AT2G33310.2	AT2G33310	1074	1293	1436	883	1074	826	6.93249	-0.281946	0.279046	auxin-induced protein 13
AT1G27300.1	AT1G27300	472	352	545	643	381	648	6.01641	0.476625	0.279181	unknown protein
AT3G20290.2	AT3G20290	86	74	97	54	44	48	3.15037	-0.637947	0.279181	EPS15 homology domain 1
AT4G10800.1	AT4G10800	25	17	44	16	10	17	3.09402	-0.80305	0.279181	unknown protein
AT2G01340.1	AT2G01340	76	56	73	37	49	33	2.97431	-0.612331	0.279194	unknown protein
AT4G36680.1	AT4G36680	99	126	149	74	94	64	4.2217	-0.512658	0.279433	Tetratricopeptide repeat (TPR)-like superfamily protein
AT3G06840.1	AT3G06840	10	6	11	3	1	3	1.49543	-1.71558	0.279441	unknown protein
AT1G04010.1	AT1G04010	45	64	48	73	60	72	3.18292	0.546941	0.279846	phospholipid sterol acyl transferase 1
AT2G11910.2	AT2G11910	7591	6142	7937	4357	5220	5524	10.2715	-0.350794	0.279846	unknown protein
AT3G27250.1	AT3G27250	7	2	1	0	0	0	0.410549	-4.75329	0.279846	unknown protein
AT5G47190.1	AT5G47190	756	560	849	896	658	833	7.5143	0.324893	0.279846	Ribosomal protein L19 family protein
AT2G36110.1	AT2G36110	0	0	0	3	3	3	-1.39407	4.73254	0.28156	Polynucleotidyl transferase, ribonuclease H-like superfamily protein
AT5G24530.1	AT5G24530	21	23	14	52	56	27	2.80554	1.34584	0.28156	2-oxoglutarate (2OG) and Fe(II)-dependent oxygenase superfamily protein
AT1G26300.1	AT1G26300	61	65	95	39	47	43	3.34019	-0.590232	0.282217	BSD domain-containing protein
AT2G28360.1	AT2G28360	43	50	53	25	34	20	2.60865	-0.714436	0.282499	SIT4 phosphatase-associated family protein
AT4G33260.1	AT4G33260	90	105	160	77	67	67	3.94023	-0.556668	0.282499	Transducin family protein / WD-40 repeat family protein
AT5G55220.1	AT5G55220	207	163	248	245	271	200	5.775	0.393377	0.28278	trigger factor type chaperone family protein
AT5G62390.1	AT5G62390	23027	21780	27219	14968	17346	19803	11.8703	-0.293965	0.28387	BCL-2-associated athanogene 7
AT3G58200.1	AT3G58200	61	77	102	22	71	33	3.31403	-0.750663	0.284173	TRAF-like family protein
AT1G28135.1	AT1G28135	52	40	64	89	87	85	3.5041	0.926842	0.285323	unknown protein
AT1G77470.1	AT1G77470	79	57	84	50	33	46	3.07505	-0.588705	0.28628	replication factor C subunit 3
AT5G10710.3	AT5G10710	24	16	26	32	29	34	2.10738	0.702306	0.286484	unknown protein
AT2G15400.1	AT2G15400	6	1	5	1	0	0	1.60064	-3.01228	0.286733	DNA-directed RNA polymerase family protein
AT2G18750.2	AT2G18750	1087	1000	1331	875	717	787	6.81056	-0.343131	0.289531	Calmodulin-binding protein
AT1G62170.2	AT1G62170	470	504	440	590	745	648	6.49308	0.634338	0.289742	Serine protease inhibitor (SERPIN) family protein
AT3G52610.1	AT3G52610	57	65	106	42	48	48	3.40191	-0.532898	0.289811	unknown protein
AT1G01730.1	AT1G01730	82	92	113	64	75	46	3.52914	-0.456122	0.290903	unknown protein
AT2G33845.1	AT2G33845	615	609	819	426	525	550	6.40853	-0.265087	0.290903	Nucleic acid-binding, OB-fold-like protein
AT3G60880.1	AT3G60880	82	66	70	51	42	37	3.59022	-0.579565	0.290903	dihydrodipicolinate synthase 1
AT4G18300.1	AT4G18300	66	47	75	40	39	33	3.70936	-0.564646	0.290903	Trimeric LpxA-like enzyme
AT3G14240.1	AT3G14240	1666	1618	2231	1359	1427	1252	7.60204	-0.268033	0.291042	Subtilase family protein
AT4G08870.1	AT4G08870	33	66	34	18	21	23	4.17316	-0.964887	0.291489	Arginase/deacetylase superfamily protein
AT1G54690.1	AT1G54690	194	161	230	123	148	118	5.07745	-0.409803	0.29309	gamma histone variant H2AX
AT3G16730.1	AT3G16730	255	252	371	204	191	203	5.13051	-0.366768	0.29309	unknown protein
AT1G10230.1	AT1G10230	87	76	108	59	68	43	3.72492	-0.49273	0.293191	SKP1-like 18
AT1G28395.2	AT1G28395	148	110	172	89	110	85	4.45952	-0.417261	0.293545	unknown protein
AT4G28440.1	AT4G28440	785	835	1209	682	751	628	6.92317	-0.269573	0.293545	Nucleic acid-binding, OB-fold-like protein
AT3G14570.1	AT3G14570	53	52	57	80	81	58	2.33533	0.603082	0.293819	glucan synthase-like 4
AT3G25890.1	AT3G25890	473	339	659	686	484	591	5.62812	0.463003	0.294549	Integrase-type DNA-binding superfamily protein
AT3G23450.1	AT3G23450	404	458	456	184	361	312	7.4105	-0.464492	0.295586	unknown protein
AT1G04440.1	AT1G04440	55	49	39	69	64	76	2.68448	0.698351	0.295746	casein kinase like 13
AT2G13130.1	AT2G13130	13	10	10	1	5	2	0.375102	-1.84389	0.295746	pseudogene
AT5G10320.3	AT5G10320	21	22	36	14	14	11	2.40715	-0.827407	0.299042	unknown protein
AT2G29340.2	AT2G29340	25	25	36	62	31	42	2.7671	0.835797	0.300039	NAD-dependent epimerase/dehydratase family protein
AT3G22110.1	AT3G22110	273	321	328	171	242	229	5.49188	-0.357976	0.301655	20S proteasome alpha subunit C1
AT3G27520.1	AT3G27520	135	151	202	109	112	110	4.59047	-0.377764	0.301655	unknown protein
AT3G61960.1	AT3G61960	31	42	69	25	25	28	2.39912	-0.668768	0.301655	Protein kinase superfamily protein
AT4G18930.1	AT4G18930	15	20	24	8	9	10	2.23398	-0.939831	0.301655	RNA ligase/cyclic nucleotide phosphodiesterase family protein
AT5G08080.1	AT5G08080	448	458	621	509	500	660	6.12811	0.311293	0.301655	syntaxin of plants 132
AT2G16600.1	AT2G16600	9696	8920	13307	7267	7786	7943	10.3651	-0.285832	0.302457	rotamase CYP 3
AT5G45760.1	AT5G45760	10	17	18	7	8	3	1.66793	-1.1298	0.302924	Transducin/WD40 repeat-like superfamily protein
AT2G46830.1	AT2G46830	104	134	200	216	199	303	5.14573	0.911534	0.303123	circadian clock associated 1
AT1G72180.1	AT1G72180	310	302	358	408	337	500	4.87626	0.53295	0.303148	Leucine-rich receptor-like protein kinase family protein
AT1G26660.1	AT1G26660	32	32	55	24	18	15	2.25116	-0.862731	0.307198	Prefoldin chaperone subunit family protein
AT1G62310.1	AT1G62310	326	308	442	210	226	248	4.70362	-0.46899	0.307198	transcription factor jumonji (jmjC) domain-containing protein
AT4G23930.2	AT4G23930	15	12	20	2	10	6	0.904696	-1.18707	0.307198	Late embryogenesis abundant (LEA) hydroxyproline-rich glycoprotein family
AT1G31040.1	AT1G31040	83	52	71	83	94	110	4.89018	0.647286	0.307758	PLATZ transcription factor family protein
AT5G61865.1	AT5G61865	11	12	20	6	4	4	0.721766	-1.40331	0.307758	unknown protein
AT1G24880.2	AT1G24880	1990	1831	2452	1517	1639	1121	7.48212	-0.375931	0.307987	UDP-3-O-acyl N-acetylglycosamine deacetylase family protein
AT1G52040.1	AT1G52040	432	986	1302	327	570	424	6.77944	-0.846825	0.307987	myrosinase-binding protein 1
AT3G01070.1	AT3G01070	11	18	21	5	4	11	1.95076	-1.12678	0.307987	early nodulin-like protein 16
AT3G48510.1	AT3G48510	3	4	5	0	1	0	0.127498	-3.01818	0.307987	unknown protein
AT4G18570.1	AT4G18570	269	219	297	198	187	149	5.64494	-0.379643	0.307987	Tetratricopeptide repeat (TPR)-like superfamily protein
AT4G22490.1	AT4G22490	3	2	0	9	4	5	4.67167	1.93587	0.307987	Bifunctional inhibitor/lipid-transfer protein/seed storage 2S albumin superfamily protein
AT5G15150.1	AT5G15150	27	20	31	52	44	29	1.67773	0.858638	0.307987	homeobox 3
AT2G32960.1	AT2G32960	27	23	20	9	13	8	0.583558	-1.05841	0.308401	Phosphotyrosine protein phosphatases superfamily protein
AT2G17620.1	AT2G17620	18	15	20	9	3	9	2.05728	-1.14344	0.309168	Cyclin B2;1
AT2G45340.1	AT2G45340	102	121	143	81	84	74	4.18734	-0.438025	0.309343	Leucine-rich repeat protein kinase family protein
AT2G38730.1	AT2G38730	131	140	208	105	119	87	4.5666	-0.435715	0.310096	Cyclophilin-like peptidyl-prolyl cis-trans isomerase family protein
AT3G63190.1	AT3G63190	1038	845	1194	1088	976	1308	7.76012	0.312689	0.310096	ribosome recycling factor, chloroplast precursor
AT5G16160.1	AT5G16160	39	46	68	24	42	21	3.06467	-0.62812	0.310096	unknown protein
AT2G30140.1	AT2G30140	34	31	35	49	64	35	4.0808	0.731036	0.312595	UDP-Glycosyltransferase superfamily protein
AT3G53210.1	AT3G53210	29	33	54	70	42	59	1.66188	0.755585	0.312595	nodulin MtN21 /EamA-like transporter family protein
AT3G62160.1	AT3G62160	3	8	3	10	13	9	0.133531	1.32937	0.312595	HXXXD-type acyl-transferase family protein
AT3G14430.1	AT3G14430	485	579	740	434	448	386	6.07175	-0.327496	0.312627	unknown protein
AT2G37840.2	AT2G37840	347	324	485	301	256	264	5.38485	-0.306452	0.31379	Protein kinase superfamily protein
AT4G30660.1	AT4G30660	278	301	329	171	196	156	6.432	-0.630497	0.316743	Low temperature and salt responsive protein family
AT2G02080.2	AT2G02080	107	75	89	135	94	115	4.29565	0.511889	0.317851	indeterminate(ID)-domain 4
AT4G26470.1	AT4G26470	5	5	9	0	2	2	0.371429	-1.9682	0.317923	Calcium-binding EF-hand family protein
ATCG00070.1	ATCG00070	92	70	91	109	105	114	4.06779	0.546776	0.317923	photosystem II reaction center protein K precursor
AT1G25425.1	AT1G25425	0	2	0	3	3	7	0.0644582	2.64214	0.318387	CLAVATA3/ESR-RELATED 43
AT5G57130.1	AT5G57130	1206	939	1741	1011	881	802	6.47963	-0.327749	0.318387	Clp amino terminal domain-containing protein
AT5G02100.1	AT5G02100	27	32	37	10	22	18	2.77319	-0.762079	0.319873	Oxysterol-binding family protein
AT1G47710.1	AT1G47710	131	173	176	102	112	105	4.15932	-0.420333	0.320075	Serine protease inhibitor (SERPIN) family protein
AT3G17300.1	AT3G17300	54	65	86	47	39	31	2.98099	-0.624023	0.320108	unknown protein
AT3G63290.1	AT3G63290	72	74	90	47	41	61	3.46274	-0.485413	0.320319	2-oxoglutarate (2OG) and Fe(II)-dependent oxygenase superfamily protein
AT1G68185.1	AT1G68185	237	189	287	164	185	141	5.00568	-0.359384	0.32086	Ubiquitin-like superfamily protein
AT4G18280.1	AT4G18280	315	365	390	222	166	162	5.92365	-0.791437	0.32086	glycine-rich cell wall protein-related
AT5G28500.2	AT5G28500	1953	1559	2214	1996	2111	1972	8.3719	0.264432	0.322905	unknown protein
AT2G27740.1	AT2G27740	195	220	290	273	301	287	4.24661	0.469967	0.323582	Family of unknown function (DUF662)
AT1G21690.1	AT1G21690	78	80	109	56	49	53	3.41062	-0.573308	0.323954	ATPase family associated with various cellular activities (AAA)
AT1G26930.1	AT1G26930	49	27	69	68	52	70	2.88177	0.587838	0.323954	Galactose oxidase/kelch repeat superfamily protein
AT1G54180.1	AT1G54180	26	25	21	9	17	10	1.97909	-0.829859	0.323954	BREVIS RADIX-like 3
AT2G33510.1	AT2G33510	270	288	360	388	327	366	5.44731	0.414346	0.323954	unknown protein
AT3G15680.1	AT3G15680	530	601	792	455	469	414	5.94347	-0.340894	0.323954	Ran BP2/NZF zinc finger-like superfamily protein
AT5G27360.1	AT5G27360	28	42	51	46	55	84	2.38318	0.793133	0.323954	Major facilitator superfamily protein
AT1G74030.1	AT1G74030	36	46	66	25	31	28	3.41054	-0.62928	0.324054	enolase 1
AT5G28030.1	AT5G28030	38	55	53	60	78	66	1.60375	0.648464	0.324054	L-cysteine desulfhydrase 1
AT4G26860.1	AT4G26860	32	45	50	24	22	27	2.62285	-0.618917	0.32423	Predicted pyridoxal phosphate-dependent enzyme, YBL036C type
AT5G06380.1	AT5G06380	7	12	20	5	2	7	1.45503	-1.26419	0.324892	unknown protein
AT2G35350.1	AT2G35350	1327	1411	1872	882	1156	1057	6.61264	-0.395108	0.325451	poltergeist like 1
AT5G63020.1	AT5G63020	25	5	16	28	20	23	2.96528	0.800198	0.325451	Disease resistance protein (CC-NBS-LRR class) family
AT2G43120.1	AT2G43120	73	62	84	118	124	90	2.42538	0.775038	0.326485	RmlC-like cupins superfamily protein
AT1G48430.1	AT1G48430	103	98	117	67	75	53	3.22086	-0.533691	0.327639	Dihydroxyacetone kinase
AT4G40040.1	AT4G40040	4385	4929	6426	4103	4097	3489	9.81369	-0.247719	0.327639	Histone superfamily protein
AT4G39920.1	AT4G39920	32	28	47	22	23	13	2.79261	-0.695681	0.32829	C-CAP/cofactor C-like domain-containing protein
AT2G01950.1	AT2G01950	816	615	882	783	943	873	5.90806	0.344263	0.328708	BRI1-like 2
AT3G23730.1	AT3G23730	558	485	436	701	802	659	7.20467	0.691752	0.32917	xyloglucan endotransglucosylase/hydrolase 16
AT1G65730.1	AT1G65730	24	30	23	49	39	29	4.36391	0.761608	0.329416	YELLOW STRIPE like 7
AT2G07690.1	AT2G07690	146	122	226	105	100	119	4.51954	-0.412042	0.329416	Minichromosome maintenance (MCM2/3/5) family protein
AT2G27470.1	AT2G27470	2472	2604	3389	1526	2075	2284	8.33685	-0.346138	0.329416	nuclear factor Y, subunit B11
AT4G36590.1	AT4G36590	4	14	7	0	0	4	-0.184501	-2.40558	0.330029	MADS-box transcription factor family protein
AT3G01410.2	AT3G01410	47	33	39	22	25	19	3.1627	-0.678514	0.330413	Polynucleotidyl transferase, ribonuclease H-like superfamily protein
AT5G49330.1	AT5G49330	755	903	929	449	627	540	7.40485	-0.517919	0.331409	myb domain protein 111
AT3G33004.1	AT3G33004	419	328	382	566	455	525	6.09531	0.618052	0.331822	pseudogene
AT4G18330.2	AT4G18330	3	6	2	0	0	1	-1.21796	-2.92484	0.331822	Translation elongation factor EF1A/initiation factor IF2gamma family protein
AT2G15830.1	AT2G15830	24	17	19	4	6	10	2.54108	-1.40825	0.332133	unknown protein
AT3G25900.3	AT3G25900	46	40	37	56	75	36	3.38456	0.601247	0.332133	Homocysteine S-methyltransferase family protein
AT3G27060.1	AT3G27060	490	589	698	361	438	384	6.71849	-0.41279	0.332133	Ferritin/ribonucleotide reductase-like family protein
AT5G08040.1	AT5G08040	829	811	1137	655	694	644	7.12345	-0.295345	0.332133	mitochondrial import receptor subunit TOM5 homolog
AT5G64660.1	AT5G64660	68	55	77	19	50	17	2.27626	-1.04578	0.332439	CYS, MET, PRO, and GLY protein 2
AT2G28480.1	AT2G28480	109	83	110	54	68	62	3.72186	-0.541776	0.333887	RNA-binding CRS1 / YhbY (CRM) domain protein
AT2G17340.1	AT2G17340	125	148	179	98	102	91	4.28392	-0.457733	0.333918	Uncharacterised conserved protein (UCP030210)
AT3G48720.1	AT3G48720	5	8	2	18	12	8	1.76033	1.46396	0.333918	HXXXD-type acyl-transferase family protein
AT4G01960.1	AT4G01960	262	228	346	211	178	188	5.00569	-0.348603	0.333918	unknown protein
AT5G57567.1	AT5G57567	19	17	23	11	10	7	0.263427	-0.88849	0.335506	unknown protein
AT5G06050.1	AT5G06050	168	172	229	111	124	159	4.92428	-0.3496	0.335512	Putative methyltransferase family protein
AT3G20040.1	AT3G20040	54	69	69	26	37	44	2.84548	-0.674907	0.335938	Hexokinase
AT3G45040.1	AT3G45040	61	69	83	42	38	46	2.8872	-0.578788	0.336291	phosphatidate cytidylyltransferase family protein
AT3G48800.1	AT3G48800	199	232	252	279	268	223	5.19214	0.34338	0.33687	Sterile alpha motif (SAM) domain-containing protein
AT5G07800.1	AT5G07800	563	649	626	578	923	689	5.97839	0.406988	0.33687	Flavin-binding monooxygenase family protein
AT1G08800.1	AT1G08800	57	60	71	96	66	80	4.15768	0.540333	0.337031	Protein of unknown function, DUF593
AT4G16442.1	AT4G16442	182	193	246	138	139	131	4.88888	-0.427352	0.337524	Uncharacterised protein family (UPF0497)
AT1G55035.1	AT1G55035	14	5	8	4	3	0	-0.862224	-1.7299	0.337661	pseudogene
AT2G03760.1	AT2G03760	104	87	148	152	124	149	4.36502	0.518967	0.337661	sulphotransferase 12
AT2G33770.1	AT2G33770	102	120	143	168	146	182	4.21412	0.619562	0.337661	phosphate 2
AT2G46990.1	AT2G46990	9	15	17	1	9	5	0.694342	-1.25509	0.337661	indole-3-acetic acid inducible 20
AT3G11430.1	AT3G11430	0	0	0	12	0	0	-0.882036	5.15115	0.337661	glycerol-3-phosphate acyltransferase 5
AT3G17600.1	AT3G17600	2	15	18	0	5	0	-0.774559	-2.53736	0.337661	indole-3-acetic acid inducible 31
AT3G21400.1	AT3G21400	24	28	29	37	40	42	2.06526	0.72364	0.337661	unknown protein
AT3G46450.1	AT3G46450	210	210	227	135	161	152	4.74133	-0.363473	0.337661	SEC14 cytosolic factor family protein / phosphoglyceride transfer family protein
AT4G24140.1	AT4G24140	19	37	32	15	9	11	2.16982	-1.15611	0.337661	alpha/beta-Hydrolases superfamily protein
AT5G14320.2	AT5G14320	1794	1334	2131	2184	1829	1833	8.65552	0.340137	0.337661	Ribosomal protein S13/S18 family
AT4G22160.1	AT4G22160	130	130	177	178	198	145	3.43458	0.433305	0.337929	unknown protein
AT2G37400.1	AT2G37400	520	458	679	360	448	346	6.10877	-0.339129	0.339403	Tetratricopeptide repeat (TPR)-like superfamily protein
AT1G01680.1	AT1G01680	1	0	1	3	10	1	-1.07753	2.75815	0.339483	plant U-box 54
AT1G28600.1	AT1G28600	57	71	67	95	104	77	3.02231	0.661878	0.339547	GDSL-like Lipase/Acylhydrolase superfamily protein
AT1G61890.1	AT1G61890	247	131	214	129	120	74	5.53951	-0.698799	0.339547	MATE efflux family protein
AT1G27510.1	AT1G27510	353	280	441	413	343	399	5.41687	0.291379	0.340081	Protein of unknown function (DUF3506)
AT3G08860.1	AT3G08860	1	0	0	5	2	4	-0.458581	3.19601	0.341055	PYRIMIDINE 4
AT1G51060.1	AT1G51060	931	998	1301	710	870	686	7.57965	-0.332966	0.343758	histone H2A 10
AT2G40490.1	AT2G40490	451	339	589	529	469	489	6.9065	0.300777	0.343791	Uroporphyrinogen decarboxylase
AT3G51610.1	AT3G51610	132	128	178	93	129	72	4.20586	-0.395613	0.343791	unknown protein
AT4G19870.1	AT4G19870	29	42	43	24	19	18	2.08978	-0.725115	0.343791	Galactose oxidase/kelch repeat superfamily protein
AT5G43840.1	AT5G43840	0	0	3	6	1	9	-1.41302	2.50802	0.343791	heat shock transcription factor A6A
AT5G54430.1	AT5G54430	1385	1440	1964	1277	1228	1085	7.70957	-0.232423	0.343791	Adenine nucleotide alpha hydrolases-like superfamily protein
AT5G01500.1	AT5G01500	119	134	196	61	117	100	3.31475	-0.505176	0.346387	thylakoid ATP/ADP carrier
AT5G54610.1	AT5G54610	0	0	2	5	12	6	-0.10369	3.51886	0.346387	ankyrin
AT1G17370.1	AT1G17370	960	970	1247	781	794	785	6.93072	-0.251098	0.346538	oligouridylate binding protein 1B
AT1G78790.1	AT1G78790	50	55	68	31	40	35	2.38453	-0.527889	0.348412	unknown protein
AT1G15940.1	AT1G15940	1905	2003	2610	1318	1658	1533	8.17545	-0.353456	0.3488	Tudor/PWWP/MBT superfamily protein
AT1G05180.2	AT1G05180	92	102	134	83	76	57	3.66464	-0.421449	0.349248	NAD(P)-binding Rossmann-fold superfamily protein
AT1G52690.2	AT1G52690	12	121	49	15	2	1	1.90615	-3.19023	0.349248	Late embryogenesis abundant protein (LEA) family protein
AT2G15080.1	AT2G15080	1	0	1	2	8	4	0.6537	2.76092	0.349248	receptor like protein 19
AT3G17330.1	AT3G17330	155	147	168	86	127	101	4.54574	-0.413822	0.349248	evolutionarily conserved C-terminal region 6
AT5G65730.1	AT5G65730	529	478	760	968	739	669	5.20127	0.621528	0.349248	xyloglucan endotransglucosylase/hydrolase 6
AT4G38460.1	AT4G38460	144	145	207	112	110	101	4.56322	-0.433862	0.34951	geranylgeranyl reductase
AT5G06810.1	AT5G06810	22	29	35	16	17	12	1.38101	-0.75103	0.349806	Mitochondrial transcription termination factor family protein
AT5G66230.1	AT5G66230	232	232	306	174	186	161	5.51865	-0.384597	0.349806	Chalcone-flavanone isomerase family protein
AT1G49050.1	AT1G49050	3	1	3	12	7	3	0.495773	1.7809	0.350215	Eukaryotic aspartyl protease family protein
AT2G17560.3	AT2G17560	520	638	813	453	536	427	7.03027	-0.296688	0.350215	high mobility group B4
AT2G26695.1	AT2G26695	433	314	429	201	183	157	3.50102	-0.947077	0.350215	Ran BP2/NZF zinc finger-like superfamily protein
AT5G49730.1	AT5G49730	123	135	158	222	186	182	4.95754	0.677725	0.350215	ferric reduction oxidase 6
AT5G26210.1	AT5G26210	529	555	654	483	410	371	6.57243	-0.285965	0.350833	alfin-like 4
AT3G27330.1	AT3G27330	212	187	223	122	166	134	5.15057	-0.39128	0.350888	zinc finger (C3HC4-type RING finger) family protein
AT4G35940.2	AT4G35940	606	500	678	648	692	685	6.2646	0.358464	0.351805	unknown protein
AT5G23750.2	AT5G23750	129	148	147	130	195	224	4.6029	0.533577	0.352563	Remorin family protein
AT2G32690.4	AT2G32690	7157	5521	7922	5217	5051	4410	10.7421	-0.310645	0.352865	glycine-rich protein 23
AT1G20080.1	AT1G20080	0	1	1	2	4	7	-1.28797	2.65745	0.353597	Calcium-dependent lipid-binding (CaLB domain) family protein
AT3G45240.1	AT3G45240	850	754	1037	594	650	663	6.52442	-0.290812	0.353807	geminivirus rep interacting kinase 1
AT1G14980.1	AT1G14980	948	1001	1277	763	876	704	7.37363	-0.284559	0.354393	chaperonin 10
AT1G01600.1	AT1G01600	128	355	242	107	201	121	5.11175	-0.616354	0.354699	cytochrome P450, family 86, subfamily A, polypeptide 4
AT1G06830.1	AT1G06830	32	61	39	19	22	10	0.945348	-1.22953	0.354699	Glutaredoxin family protein
AT4G30662.1	AT4G30662	81	114	115	60	57	54	5.02404	-0.689177	0.354699	unknown protein
AT5G55820.1	AT5G55820	1393	1367	1694	1033	1168	1085	7.7148	-0.265751	0.355325	unknown protein
AT4G18375.1	AT4G18375	13	7	7	3	4	0	0.316092	-1.74522	0.356961	RNA-binding KH domain-containing protein
AT1G55370.2	AT1G55370	98	67	86	116	91	93	4.46564	0.429372	0.358077	NDH-dependent cyclic electron flow 5
AT5G38430.1	AT5G38430	2201	1719	2369	2823	2478	2059	8.75043	0.402937	0.358706	Ribulose bisphosphate carboxylase (small chain) family protein
AT1G10490.1	AT1G10490	265	233	349	328	313	284	5.05861	0.311425	0.35874	Domain of unknown function (DUF1726) ;Putative ATPase (DUF699)
AT4G33220.1	AT4G33220	270	392	435	199	304	238	6.53839	-0.394024	0.359032	pectin methylesterase 44
AT1G63460.1	AT1G63460	39	30	49	25	26	17	2.59369	-0.611237	0.359115	glutathione peroxidase 8
AT2G20250.1	AT2G20250	10	3	9	2	0	3	0.0303093	-1.87462	0.359115	unknown protein
AT1G62045.1	AT1G62045	59	64	77	68	88	95	2.67966	0.502207	0.359735	unknown protein
AT1G54840.2	AT1G54840	31	35	46	18	22	20	2.53153	-0.716955	0.360069	HSP20-like chaperones superfamily protein
AT1G75150.1	AT1G75150	244	267	352	157	176	228	5.46907	-0.439132	0.360478	unknown protein
AT3G01470.1	AT3G01470	117	132	132	81	76	59	3.08149	-0.655767	0.360478	homeobox 1
AT3G01472.1	AT3G01472	117	132	132	81	76	59	3.08149	-0.655767	0.360478	conserved peptide upstream open reading frame 33
AT3G28070.2	AT3G28070	59	59	102	66	107	110	3.2778	0.55589	0.360501	nodulin MtN21 /EamA-like transporter family protein
AT1G50830.1	AT1G50830	27	31	41	17	19	13	2.47693	-0.829153	0.363911	Aminotransferase-like, plant mobile domain family protein
AT5G37780.3	AT5G37780	1515	1565	2059	1193	1438	1056	8.24613	-0.301078	0.363911	calmodulin 1
AT5G56240.1	AT5G56240	216	186	232	250	216	230	4.43203	0.30874	0.363911	unknown protein
AT5G61660.1	AT5G61660	651	596	548	721	1021	705	6.66476	0.591635	0.363911	glycine-rich protein
AT1G63100.1	AT1G63100	1286	1348	1776	977	1151	989	7.25659	-0.321384	0.365854	GRAS family transcription factor
AT1G63295.1	AT1G63295	54	73	55	116	109	109	2.83951	1.02018	0.365854	Remorin family protein
AT4G39230.1	AT4G39230	33	18	33	11	14	13	1.25917	-0.956203	0.365855	NmrA-like negative transcriptional regulator family protein
AT2G19920.1	AT2G19920	55	53	62	29	27	39	1.67835	-0.664703	0.366239	RNA-dependent RNA polymerase family protein
AT3G60290.1	AT3G60290	10	9	14	28	15	17	1.0174	1.04084	0.36721	2-oxoglutarate (2OG) and Fe(II)-dependent oxygenase superfamily protein
AT5G10450.1	AT5G10450	2065	1717	2700	2424	1986	2552	8.07695	0.293947	0.369052	G-box regulating factor 6
AT1G63300.1	AT1G63300	230	225	274	264	300	291	4.91885	0.402332	0.369197	Myosin heavy chain-related protein
AT3G58610.2	AT3G58610	1839	1452	1871	1256	1261	1320	8.43739	-0.257033	0.369197	ketol-acid reductoisomerase
AT5G47430.2	AT5G47430	181	150	217	207	196	224	4.38573	0.375389	0.369197	DWNN domain, a CCHC-type zinc finger
AT3G05740.1	AT3G05740	20	10	19	9	4	7	1.27103	-1.09646	0.369333	RECQ helicase l1
AT3G52380.1	AT3G52380	1130	793	1295	1341	1005	1180	7.65109	0.320014	0.369333	chloroplast RNA-binding protein 33
AT1G15970.1	AT1G15970	143	140	190	97	116	99	4.04668	-0.420397	0.369896	DNA glycosylase superfamily protein
AT5G42670.1	AT5G42670	415	371	651	554	526	463	5.90493	0.300129	0.370193	Agenet domain-containing protein
AT3G45242.1	AT3G45242	843	748	1019	584	644	658	6.51512	-0.290525	0.370448	conserved peptide upstream open reading frame 61
AT5G63180.1	AT5G63180	47	40	29	23	24	14	2.74551	-0.776824	0.370502	Pectin lyase-like superfamily protein
AT5G15070.1	AT5G15070	6	2	13	12	13	17	1.42301	1.19172	0.370959	Phosphoglycerate mutase-like family protein
AT4G15830.1	AT4G15830	321	315	442	270	254	251	5.5955	-0.292666	0.37187	ARM repeat superfamily protein
AT4G23470.2	AT4G23470	465	388	550	500	536	484	6.3059	0.294561	0.372786	PLAC8 family protein
AT5G35630.2	AT5G35630	1308	1054	1458	1449	1362	1412	7.56626	0.32221	0.372786	glutamine synthetase 2
AT3G12520.1	AT3G12520	8	4	4	13	13	11	0.925047	1.35175	0.372815	sulfate transporter 4;2
AT1G66910.1	AT1G66910	5	8	9	12	18	16	0.951967	1.22611	0.372998	Protein kinase superfamily protein
AT3G53280.1	AT3G53280	4	10	11	17	10	17	1.96665	0.985581	0.372998	cytochrome p450 71b5
AT4G19460.1	AT4G19460	3	2	17	17	12	16	1.94699	1.26038	0.372998	UDP-Glycosyltransferase superfamily protein
AT5G05330.2	AT5G05330	105	122	164	86	81	72	3.80022	-0.525197	0.372998	HMG-box (high mobility group) DNA-binding family protein
AT2G30100.1	AT2G30100	474	478	604	369	376	326	5.63014	-0.362818	0.374397	pentatricopeptide (PPR) repeat-containing protein
AT3G05890.1	AT3G05890	0	0	1	3	6	1	2.21157	3.06983	0.374596	Low temperature and salt responsive protein family
AT3G10570.1	AT3G10570	69	116	130	57	63	54	3.88315	-0.677232	0.374596	cytochrome P450, family 77, subfamily A, polypeptide 6
AT3G25100.1	AT3G25100	35	37	52	22	15	30	3.54784	-0.700549	0.375473	cell division cycle 45
AT4G22950.1	AT4G22950	5	10	6	2	1	2	-1.18056	-1.84202	0.375473	AGAMOUS-like 19
AT2G42120.1	AT2G42120	60	35	63	42	18	30	2.80373	-0.62397	0.376134	DNA polymerase delta small subunit
AT4G19120.1	AT4G19120	389	416	339	449	600	431	6.03431	0.512841	0.376292	S-adenosyl-L-methionine-dependent methyltransferases superfamily protein
AT4G22260.1	AT4G22260	75	67	88	46	42	55	3.39158	-0.506892	0.37654	Alternative oxidase family protein
AT1G01580.1	AT1G01580	14	13	21	31	53	41	0.342141	1.56042	0.377168	ferric reduction oxidase 2
AT2G40010.1	AT2G40010	32	34	45	20	28	11	3.22982	-0.73016	0.377168	Ribosomal protein L10 family protein
AT4G13200.1	AT4G13200	171	145	192	128	126	99	4.86867	-0.348881	0.377168	unknown protein
AT3G10730.1	AT3G10730	281	286	350	210	245	202	5.40775	-0.307021	0.37717	SAD1/UNC-84 domain protein 2
AT4G20740.1	AT4G20740	12	5	18	6	4	1	0.752073	-1.43832	0.37717	Pentatricopeptide repeat (PPR-like) superfamily protein
AT4G11400.1	AT4G11400	6	17	18	5	6	5	1.42458	-1.15949	0.37793	ARID/BRIGHT DNA-binding domain;ELM2 domain protein
AT1G27880.1	AT1G27880	19	13	17	8	4	7	1.4703	-1.17816	0.378077	DEAD/DEAH box RNA helicase family protein
AT3G19770.1	AT3G19770	126	137	175	98	112	80	3.80256	-0.416511	0.378077	Vacuolar sorting protein 9 (VPS9) domain
AT5G18820.1	AT5G18820	69	47	72	33	43	41	3.28056	-0.504842	0.378359	TCP-1/cpn60 chaperonin family protein
AT4G30080.1	AT4G30080	24	20	38	40	50	23	2.35555	0.647257	0.37926	auxin response factor 16
AT1G69690.1	AT1G69690	685	560	796	904	706	678	6.59788	0.346063	0.380218	TCP family transcription factor
AT5G53900.2	AT5G53900	127	100	177	100	85	59	3.46336	-0.533224	0.380278	Serine/threonine-protein kinase WNK (With No Lysine)-related
AT2G25950.1	AT2G25950	64	73	84	44	43	42	3.00652	-0.601355	0.38057	Protein of unknown function (DUF1000)
AT3G61610.1	AT3G61610	32	33	56	22	18	23	3.16707	-0.744539	0.38057	Galactose mutarotase-like superfamily protein
AT3G49260.1	AT3G49260	186	127	217	111	95	129	4.53277	-0.47315	0.381259	IQ-domain 21
AT3G49220.1	AT3G49220	261	263	339	261	451	308	5.44585	0.414016	0.381822	Plant invertase/pectin methylesterase inhibitor superfamily
AT1G23400.1	AT1G23400	134	113	220	185	158	198	4.65762	0.413752	0.381965	RNA-binding CRS1 / YhbY (CRM) domain-containing protein
AT3G56580.2	AT3G56580	589	610	801	445	535	450	6.38302	-0.305475	0.381965	RING/U-box superfamily protein
AT4G24520.1	AT4G24520	340	276	462	445	339	369	5.44754	0.288747	0.382132	P450 reductase 1
AT2G47370.1	AT2G47370	47	55	72	29	37	27	2.91191	-0.721077	0.382438	Calcium-dependent phosphotriesterase superfamily protein
AT1G27350.1	AT1G27350	207	265	279	193	183	146	5.01421	-0.354792	0.382562	Ribosome associated membrane protein RAMP4
AT3G57020.2	AT3G57020	89	39	98	133	86	101	3.98246	0.701869	0.38326	Calcium-dependent phosphotriesterase superfamily protein
AT3G59780.1	AT3G59780	48	41	54	66	55	58	3.33194	0.500539	0.383598	Rhodanese/Cell cycle control phosphatase superfamily protein
AT4G19130.1	AT4G19130	6	7	15	3	3	2	0.842089	-1.5683	0.384851	Replication factor-A protein 1-related
AT4G31930.1	AT4G31930	32	45	51	22	26	20	2.25219	-0.733538	0.384979	Mitochondrial glycoprotein family protein
AT1G74890.1	AT1G74890	12	5	10	17	22	12	0.426469	1.08321	0.385568	response regulator 15
AT3G11320.1	AT3G11320	35	24	44	35	46	62	2.54348	0.658119	0.385568	Nucleotide-sugar transporter family protein
AT2G24280.1	AT2G24280	87	68	98	112	93	121	3.51826	0.545745	0.385808	alpha/beta-Hydrolases superfamily protein
AT4G28550.1	AT4G28550	31	25	41	43	46	39	2.81854	0.580648	0.38645	Ypt/Rab-GAP domain of gyp1p superfamily protein
AT5G20420.1	AT5G20420	88	95	123	51	62	67	2.77213	-0.585338	0.38782	chromatin remodeling 42
AT5G57270.3	AT5G57270	57	61	93	79	89	84	3.31228	0.441239	0.388005	Core-2/I-branching beta-1,6-N-acetylglucosaminyltransferase family protein
AT3G51720.1	AT3G51720	4059	4028	5092	2768	3395	3065	8.73798	-0.340241	0.38834	Plant protein of unknown function (DUF827)
AT1G02335.1	AT1G02335	30	33	31	50	48	47	3.21025	0.786117	0.388776	germin-like protein subfamily 2 member 2 precursor
AT3G01890.1	AT3G01890	23	30	38	11	19	16	1.53365	-0.799733	0.388945	SWIB/MDM2 domain superfamily protein
ATMG00810.1	ATMG00810	12	10	15	17	20	22	1.46838	0.846201	0.388945	DNA/RNA polymerases superfamily protein
AT3G54470.1	AT3G54470	1034	1042	1269	642	875	903	7.64408	-0.295418	0.389545	uridine 5'-monophosphate synthase / UMP synthase (PYRE-F) (UMPS)
AT1G55490.1	AT1G55490	849	616	994	888	807	886	7.57346	0.255988	0.390425	chaperonin 60 beta
AT3G10270.1	AT3G10270	38	68	80	72	81	77	3.38448	0.486973	0.390425	DNA GYRASE B1
AT4G04040.1	AT4G04040	112	94	156	139	158	162	3.96055	0.532182	0.390425	Phosphofructokinase family protein
AT1G78650.1	AT1G78650	196	191	329	137	152	185	4.95654	-0.397144	0.390589	DNA-directed DNA polymerases
AT3G13550.2	AT3G13550	14	11	16	2	5	6	0.421699	-1.45464	0.391048	Ubiquitin-conjugating enzyme family protein
AT5G25570.3	AT5G25570	63	63	86	40	44	43	3.01552	-0.55725	0.391244	unknown protein
AT5G46450.1	AT5G46450	38	19	42	41	38	60	2.17247	0.677407	0.39141	Disease resistance protein (TIR-NBS-LRR class) family
AT1G09590.1	AT1G09590	1438	1414	1943	1187	1244	1103	8.22071	-0.258422	0.391535	Translation protein SH3-like family protein
AT2G21880.1	AT2G21880	4	3	3	12	4	10	0.470129	1.51723	0.391535	RAB GTPase homolog 7A
AT3G57320.1	AT3G57320	73	81	105	54	53	53	3.58539	-0.513485	0.391535	unknown protein
AT4G03960.1	AT4G03960	16	13	23	26	36	25	2.11814	0.923992	0.391535	Phosphotyrosine protein phosphatases superfamily protein
AT4G27460.1	AT4G27460	46	26	44	118	43	59	1.8555	1.10885	0.391535	Cystathionine beta-synthase (CBS) family protein
AT5G08150.1	AT5G08150	16	9	22	3	7	3	1.70709	-1.62909	0.391535	suppressor of phytochrome b 5
AT2G41450.2	AT2G41450	6	9	3	0	3	2	0.337998	-1.62499	0.391629	N-acetyltransferases;N-acetyltransferases
AT3G43800.1	AT3G43800	62	47	58	61	88	78	3.50443	0.609194	0.391635	glutathione S-transferase tau 27
AT3G45210.1	AT3G45210	52	55	59	67	80	71	3.2311	0.560855	0.392022	Protein of unknown function, DUF584
AT1G07140.1	AT1G07140	6839	6323	7927	6706	7224	7300	9.89176	0.182199	0.392623	Pleckstrin homology (PH) domain superfamily protein
AT3G19184.1	AT3G19184	21	13	9	5	7	6	1.65804	-1.08894	0.393108	AP2/B3-like transcriptional factor family protein
AT5G40080.1	AT5G40080	77	104	111	44	69	62	3.07271	-0.568135	0.393108	Mitochondrial ribosomal protein L27
AT5G47710.1	AT5G47710	105	110	163	68	82	98	3.80972	-0.421098	0.393108	Calcium-dependent lipid-binding (CaLB domain) family protein
AT4G21190.1	AT4G21190	402	264	507	478	393	409	5.72484	0.321393	0.393186	Pentatricopeptide repeat (PPR) superfamily protein
AT1G70350.1	AT1G70350	23	17	40	34	41	30	2.81039	0.578168	0.393662	unknown protein
AT4G03820.2	AT4G03820	5	11	3	16	11	12	0.49014	1.18104	0.393662	Protein of unknown function (DUF3537)
AT5G56120.1	AT5G56120	92	92	150	77	79	64	4.33391	-0.4128	0.393662	unknown protein
AT5G36260.1	AT5G36260	3	22	10	1	6	1	-0.221378	-1.96218	0.394306	Eukaryotic aspartyl protease family protein
AT1G36070.2	AT1G36070	11	10	12	22	16	18	1.86574	0.931689	0.394335	Transducin/WD40 repeat-like superfamily protein
AT1G79180.1	AT1G79180	6	6	10	18	22	8	0.330854	1.29622	0.394335	myb domain protein 63
AT4G10920.1	AT4G10920	588	556	848	709	659	699	6.2944	0.242451	0.394335	transcriptional coactivator p15 (PC4) family protein (KELP)
AT1G22370.2	AT1G22370	1	6	7	0	0	2	1.90859	-2.42488	0.39465	UDP-glucosyl transferase 85A5
AT1G68250.1	AT1G68250	0	0	0	23	0	0	-1.21824	6.07419	0.39465	unknown protein
AT2G40170.1	AT2G40170	0	0	0	23	0	0	-1.44601	6.07419	0.39465	Stress induced protein
AT3G49430.2	AT3G49430	527	506	659	447	417	324	5.68207	-0.332796	0.39465	SER/ARG-rich protein 34A
AT3G52150.2	AT3G52150	585	507	775	718	592	654	7.08895	0.260947	0.39465	RNA-binding (RRM/RBD/RNP motifs) family protein
AT4G25780.1	AT4G25780	2	1	5	6	8	7	1.78905	1.53665	0.39465	CAP (Cysteine-rich secretory proteins, Antigen 5, and Pathogenesis-related 1 protein) superfamily protein
AT5G61000.1	AT5G61000	26	28	28	11	19	11	2.31426	-0.827833	0.394918	Replication factor-A protein 1-related
AT5G26751.1	AT5G26751	157	149	198	94	117	137	3.85645	-0.355827	0.394938	shaggy-related kinase 11
AT5G40610.1	AT5G40610	73	63	95	48	51	51	3.6984	-0.440342	0.394938	NAD-dependent glycerol-3-phosphate dehydrogenase family protein
ATCG00150.1	ATCG00150	165	134	189	233	211	210	4.95565	0.601459	0.395047	ATPase, F0 complex, subunit A protein
AT4G36105.2	AT4G36105	1	1	1	3	3	10	-0.101586	2.44381	0.395405	unknown protein
AT5G38780.1	AT5G38780	0	0	0	1	3	3	-1.61284	4.38446	0.39556	S-adenosyl-L-methionine-dependent methyltransferases superfamily protein
AT1G22710.1	AT1G22710	2337	2051	3131	3526	3274	2494	7.09363	0.493759	0.395803	sucrose-proton symporter 2
AT3G20130.1	AT3G20130	25	19	20	12	10	8	0.97024	-0.918343	0.395803	cytochrome P450, family 705, subfamily A, polypeptide 22
AT5G13490.1	AT5G13490	82	89	82	47	65	50	4.16316	-0.480796	0.395803	ADP/ATP carrier 2
AT5G43620.1	AT5G43620	163	45	47	29	43	21	2.62323	-1.33124	0.395803	Pre-mRNA cleavage complex II
ATCG00040.1	ATCG00040	1294	973	1243	1945	1461	1609	8.16296	0.685362	0.395803	maturase K
AT3G22630.1	AT3G22630	595	632	878	529	505	521	6.85504	-0.251588	0.395878	20S proteasome beta subunit D1
AT1G52760.1	AT1G52760	98	98	138	120	133	127	4.65373	0.367501	0.396077	lysophospholipase 2
AT5G02420.1	AT5G02420	1	0	1	5	2	4	0.132191	2.42524	0.396077	unknown protein
AT1G09690.1	AT1G09690	3702	3558	5242	3032	3435	2820	9.48586	-0.242536	0.396771	Translation protein SH3-like family protein
AT3G14205.1	AT3G14205	1796	1609	2071	1888	1807	1928	7.40637	0.213283	0.396771	Phosphoinositide phosphatase family protein
AT1G80040.2	AT1G80040	345	350	423	363	373	451	5.45754	0.261017	0.396783	unknown protein
AT4G02280.1	AT4G02280	2	4	1	0	0	0	0.548588	-4.22987	0.397607	sucrose synthase 3
AT3G04980.1	AT3G04980	62	51	105	34	54	40	3.96899	-0.569105	0.397771	DNAJ heat shock N-terminal domain-containing protein
AT3G56770.1	AT3G56770	3	6	4	0	0	1	-1.02601	-3.15284	0.397842	basic helix-loop-helix (bHLH) DNA-binding superfamily protein
AT4G27870.1	AT4G27870	91	83	113	72	62	52	4.66313	-0.445635	0.397842	Vacuolar iron transporter (VIT) family protein
AT3G22180.1	AT3G22180	58	51	62	27	32	30	2.10037	-0.769521	0.398155	DHHC-type zinc finger family protein
AT3G53360.1	AT3G53360	2	1	0	9	4	4	-0.779238	2.50669	0.398191	Tetratricopeptide repeat (TPR)-like superfamily protein
AT5G53290.1	AT5G53290	0	2	8	9	4	12	1.86038	1.49458	0.399279	cytokinin response factor 3
AT3G51110.1	AT3G51110	20	25	18	5	13	13	1.86292	-0.852856	0.40028	Tetratricopeptide repeat (TPR)-like superfamily protein
AT1G62990.1	AT1G62990	11	13	12	14	19	28	1.67834	0.923975	0.40068	KNOTTED-like homeobox of Arabidopsis thaliana 7
AT5G12940.1	AT5G12940	43	74	64	72	108	69	3.95348	0.618774	0.401596	Leucine-rich repeat (LRR) family protein
AT1G08230.2	AT1G08230	79	78	124	118	114	94	4.18688	0.401534	0.401788	Transmembrane amino acid transporter family protein
AT4G35760.1	AT4G35760	39	51	50	61	52	60	3.33423	0.478292	0.401788	NAD(P)H dehydrogenase (quinone)s
AT4G37910.1	AT4G37910	423	493	635	344	447	314	6.10674	-0.310137	0.401788	mitochondrial heat shock protein 70-1
AT5G21430.1	AT5G21430	149	117	182	111	102	89	4.49249	-0.385277	0.401788	Chaperone DnaJ-domain superfamily protein
AT2G19800.1	AT2G19800	154	34	147	359	162	252	4.16817	1.42212	0.402298	myo-inositol oxygenase 2
AT4G36700.1	AT4G36700	1	3	6	14	11	9	-0.274814	1.93685	0.402298	RmlC-like cupins superfamily protein
AT5G49448.1	AT5G49448	136	74	195	278	169	191	4.39627	0.873981	0.402298	conserved peptide upstream open reading frame 4
AT5G49450.1	AT5G49450	136	74	195	278	169	191	4.39627	0.87398	0.402298	basic leucine-zipper 1
AT1G10270.1	AT1G10270	103	89	133	65	83	70	3.92307	-0.394325	0.402558	glutamine-rich protein 23
AT4G13615.1	AT4G13615	1112	1140	1699	954	1109	908	7.34269	-0.222932	0.402558	Uncharacterised protein family SERF
AT1G25450.1	AT1G25450	14	4	8	23	11	11	2.28655	0.95743	0.402572	3-ketoacyl-CoA synthase 5
AT3G63088.1	AT3G63088	1	4	3	0	0	0	-0.120481	-4.40771	0.402749	ROTUNDIFOLIA like 14
AT5G16790.1	AT5G16790	17	13	24	11	4	7	1.91083	-1.09209	0.403594	Tho complex subunit 7/Mft1p
AT2G42610.1	AT2G42610	46	27	54	15	18	26	2.59768	-0.910068	0.404697	Protein of unknown function (DUF640)
AT1G18270.1	AT1G18270	294	230	515	549	319	399	4.56845	0.506191	0.405199	ketose-bisphosphate aldolase class-II family protein
AT2G24490.1	AT2G24490	45	68	85	22	44	52	3.57871	-0.563498	0.40539	replicon protein A2
AT4G03120.1	AT4G03120	27	34	50	47	50	52	2.75574	0.610209	0.406445	C2H2 and C2HC zinc fingers superfamily protein
AT3G25220.1	AT3G25220	238	229	280	193	184	147	5.38875	-0.337805	0.406699	FK506-binding protein 15 kD-1
AT4G26980.1	AT4G26980	42	55	92	42	36	38	3.05412	-0.510509	0.406699	RNI-like superfamily protein
AT5G61310.4	AT5G61310	194	181	266	171	137	126	5.04467	-0.376489	0.406699	Cytochrome c oxidase subunit Vc family protein
AT2G33880.1	AT2G33880	28	16	49	40	52	60	1.5068	0.923535	0.406841	homeobox-3
AT3G20650.2	AT3G20650	106	103	141	100	67	68	3.98049	-0.392276	0.406841	mRNA capping enzyme family protein
AT2G35950.1	AT2G35950	9	3	15	22	19	10	0.449452	1.1144	0.406922	embryo sac development arrest 12
AT3G06040.1	AT3G06040	463	413	591	325	378	376	6.101	-0.261787	0.407122	Ribosomal protein L12/ ATP-dependent Clp protease adaptor protein ClpS family protein
AT4G38480.1	AT4G38480	38	33	36	11	22	15	1.6068	-0.991258	0.407554	Transducin/WD40 repeat-like superfamily protein
AT4G27590.2	AT4G27590	5	5	11	16	10	17	0.255978	1.21799	0.408588	Heavy metal transport/detoxification superfamily protein
AT1G78360.1	AT1G78360	1	1	0	3	12	1	-1.49169	2.90373	0.408614	glutathione S-transferase TAU 21
AT4G22140.2	AT4G22140	733	769	1043	649	689	586	6.79605	-0.221546	0.408614	PHD finger family protein / bromo-adjacent homology (BAH) domain-containing protein
AT4G00695.3	AT4G00695	1	3	3	0	0	0	0.0255796	-4.21532	0.408647	unknown protein
AT4G31580.1	AT4G31580	360	394	523	272	339	323	6.28219	-0.270451	0.41016	serine/arginine-rich 22
AT2G33370.1	AT2G33370	1366	1212	1779	1063	1112	1046	8.02219	-0.25158	0.410275	Ribosomal protein L14p/L23e family protein
AT3G18773.1	AT3G18773	31	34	25	70	36	34	2.21436	0.789612	0.410275	RING/U-box superfamily protein
AT4G12730.1	AT4G12730	857	899	1068	1031	1292	1040	8.00038	0.421784	0.410275	FASCICLIN-like arabinogalactan 2
AT5G17010.1	AT5G17010	156	169	218	121	115	118	4.96912	-0.436656	0.410275	Major facilitator superfamily protein
AT5G19910.1	AT5G19910	29	19	24	5	23	8	2.29861	-0.826568	0.410275	SOH1 family protein
AT1G14670.1	AT1G14670	114	137	156	202	137	130	4.64215	0.380892	0.410602	Endomembrane protein 70 protein family
AT3G60220.1	AT3G60220	49	55	50	70	68	66	3.30728	0.5677	0.410602	TOXICOS EN LEVADURA 4
AT3G51230.1	AT3G51230	105	111	143	71	94	68	4.19748	-0.445853	0.411265	unknown protein
AT3G28857.1	AT3G28857	3	0	0	4	10	0	1.50023	2.23891	0.411621	basic helix-loop-helix (bHLH) DNA-binding family protein
AT3G54210.1	AT3G54210	580	523	767	750	628	611	7.11677	0.274756	0.411621	Ribosomal protein L17 family protein
AT5G66560.1	AT5G66560	64	83	109	96	103	91	4.13255	0.360949	0.41197	Phototropic-responsive NPH3 family protein
AT3G19910.1	AT3G19910	48	45	67	85	64	63	3.13265	0.591085	0.41248	RING/U-box superfamily protein
AT3G55120.1	AT3G55120	248	307	371	175	206	179	5.5111	-0.548707	0.41248	Chalcone-flavanone isomerase family protein
AT2G22310.1	AT2G22310	17	11	15	6	6	4	0.991535	-1.23611	0.413008	ubiquitin-specific protease 4
AT3G51890.1	AT3G51890	64	42	70	81	72	92	2.80004	0.660683	0.413008	Clathrin light chain protein
AT4G09040.1	AT4G09040	245	157	240	262	228	267	5.33696	0.416051	0.413008	RNA-binding (RRM/RBD/RNP motifs) family protein
AT5G62410.1	AT5G62410	608	595	866	420	507	505	6.71901	-0.34514	0.413008	structural maintenance of chromosomes 2
AT1G43910.1	AT1G43910	353	441	606	471	733	619	5.43245	0.566328	0.413134	P-loop containing nucleoside triphosphate hydrolases superfamily protein
AT1G75870.1	AT1G75870	2	3	0	4	5	8	1.33383	1.84871	0.413134	unknown protein
AT3G61570.1	AT3G61570	63	88	95	54	44	59	3.28045	-0.471186	0.413134	GRIP-related ARF-binding domain-containing protein 1
AT4G40030.1	AT4G40030	6537	6325	9105	5606	5992	5306	9.57215	-0.192695	0.413134	Histone superfamily protein
AT1G09000.1	AT1G09000	47	41	51	35	24	19	2.05249	-0.656243	0.413569	NPK1-related protein kinase 1
AT1G10300.1	AT1G10300	31	43	27	9	24	9	2.18642	-1.13	0.413966	Nucleolar GTP-binding protein
AT2G34640.1	AT2G34640	1041	875	1211	1101	1039	1206	7.63486	0.276843	0.413966	plastid transcriptionally active 12
AT3G59760.2	AT3G59760	181	188	233	119	161	126	4.50285	-0.393977	0.413966	O-acetylserine (thiol) lyase isoform C
AT4G28250.2	AT4G28250	1171	2223	1819	897	1467	878	7.86819	-0.537418	0.413966	expansin B3
AT1G21090.1	AT1G21090	587	607	740	433	533	426	6.30838	-0.301972	0.413969	Cupredoxin superfamily protein
AT3G48110.1	AT3G48110	71	70	92	110	88	77	3.8055	0.418057	0.415107	glycine-tRNA ligases
AT4G04610.1	AT4G04610	163	222	186	162	413	280	4.42317	0.72528	0.415107	APS reductase 1
ATCG00590.1	ATCG00590	54	56	68	109	75	94	3.41541	0.819471	0.415107	electron carriers
AT1G47830.1	AT1G47830	86	85	117	70	68	51	3.85132	-0.426289	0.415639	SNARE-like superfamily protein
AT3G03900.1	AT3G03900	13	16	14	5	4	8	0.692667	-1.15629	0.415639	adenosine-5'-phosphosulfate (APS) kinase 3
AT3G26220.1	AT3G26220	5	0	5	12	8	11	0.574409	1.79927	0.415639	cytochrome P450, family 71, subfamily B, polypeptide 3
AT5G03740.1	AT5G03740	441	492	608	417	371	342	6.60177	-0.269419	0.415639	histone deacetylase 2C
AT5G39080.1	AT5G39080	25	18	47	52	43	41	3.14999	0.805782	0.415849	HXXXD-type acyl-transferase family protein
AT1G71830.1	AT1G71830	477	529	753	562	677	630	6.22781	0.274	0.415975	somatic embryogenesis receptor-like kinase 1
AT1G72830.3	AT1G72830	11	32	37	30	69	38	3.198	0.954198	0.415975	nuclear factor Y, subunit A3
AT2G42600.1	AT2G42600	136	146	184	102	129	78	4.51295	-0.416527	0.415975	phosphoenolpyruvate carboxylase 2
AT4G25940.1	AT4G25940	38	39	54	75	69	69	2.91587	0.883467	0.415975	ENTH/ANTH/VHS superfamily protein
AT5G05400.1	AT5G05400	3	2	6	6	13	10	0.333114	1.55829	0.415975	LRR and NB-ARC domains-containing disease resistance protein
AT5G40090.1	AT5G40090	3	1	3	0	0	0	-0.25659	-4.21128	0.415975	Disease resistance protein (TIR-NBS class)
AT5G65380.1	AT5G65380	23	11	26	31	31	21	2.94194	0.648324	0.416017	MATE efflux family protein
AT2G43030.1	AT2G43030	1664	1341	1888	2025	1536	1839	8.52085	0.323209	0.416421	Ribosomal protein L3 family protein
AT1G48270.1	AT1G48270	32	39	62	31	28	21	2.81843	-0.545444	0.416786	G-protein-coupled receptor 1
AT2G15530.4	AT2G15530	176	186	194	122	124	134	4.53584	-0.382608	0.416786	RING/U-box superfamily protein
AT3G20100.1	AT3G20100	186	232	261	228	275	313	5.63665	0.437358	0.416786	cytochrome P450, family 705, subfamily A, polypeptide 19
AT3G24150.1	AT3G24150	53	32	65	17	39	32	2.93319	-0.581671	0.416786	unknown protein
AT4G17240.2	AT4G17240	44	34	40	13	31	24	3.8626	-0.623695	0.416786	unknown protein
AT4G25835.1	AT4G25835	186	93	230	266	117	295	5.74458	0.625131	0.416786	P-loop containing nucleoside triphosphate hydrolases superfamily protein
AT4G35620.1	AT4G35620	172	166	211	93	128	149	4.70694	-0.393753	0.416786	Cyclin B2;2
AT5G40150.1	AT5G40150	135	170	173	87	130	118	3.98469	-0.344394	0.416786	Peroxidase superfamily protein
AT5G46200.1	AT5G46200	1	3	3	0	0	0	-1.23773	-4.21527	0.416786	Protein of Unknown Function (DUF239)
AT5G50360.1	AT5G50360	5	7	4	1	1	1	0.670945	-2.13559	0.416786	unknown protein
AT1G29660.1	AT1G29660	0	3	1	9	4	2	2.68975	1.9772	0.417096	GDSL-like Lipase/Acylhydrolase superfamily protein
AT3G22330.1	AT3G22330	621	604	932	504	545	487	6.33155	-0.299436	0.417096	putative mitochondrial RNA helicase 2
AT1G20230.1	AT1G20230	4	2	3	6	7	9	0.201344	1.42675	0.417258	Pentatricopeptide repeat (PPR) superfamily protein
AT3G61430.2	AT3G61430	202	185	222	237	251	261	4.76604	0.468442	0.417736	plasma membrane intrinsic protein 1A
AT4G35570.1	AT4G35570	698	809	984	622	706	535	7.10779	-0.243494	0.419076	high mobility group B5
AT1G18180.1	AT1G18180	41	55	46	16	30	36	2.36346	-0.629167	0.419093	Protein of unknown function (DUF1295)
AT1G70200.1	AT1G70200	1043	912	1403	1046	1149	1422	7.63627	0.295456	0.419093	RNA-binding (RRM/RBD/RNP motifs) family protein
AT5G61910.3	AT5G61910	40	47	53	47	81	54	2.58084	0.548602	0.419093	DCD (Development and Cell Death) domain protein
AT1G70290.1	AT1G70290	123	80	131	202	128	190	3.81265	0.825166	0.420204	trehalose-6-phosphatase synthase S8
AT2G42390.1	AT2G42390	44	40	42	21	32	13	2.1533	-0.768745	0.420204	protein kinase C substrate, heavy chain-related
AT1G71865.1	AT1G71865	14	16	32	17	6	5	1.56968	-0.938454	0.42167	unknown protein
AT1G65150.2	AT1G65150	54	42	73	19	48	21	3.48612	-0.754461	0.421763	TRAF-like family protein
AT3G28270.2	AT3G28270	2	53	1	6	6	7	4.51329	-1.50044	0.421763	Protein of unknown function (DUF677)
AT3G57240.1	AT3G57240	0	0	0	4	7	1	-1.04862	5.12553	0.421763	beta-1,3-glucanase 3
AT4G33270.1	AT4G33270	78	80	96	65	51	47	3.62498	-0.463268	0.421763	Transducin family protein / WD-40 repeat family protein
AT5G01660.1	AT5G01660	50	37	43	23	28	18	1.93015	-0.746567	0.421763	unknown protein
AT5G11780.1	AT5G11780	18	33	23	13	14	7	1.96568	-0.961467	0.421763	unknown protein
AT5G13730.1	AT5G13730	251	166	237	268	244	285	4.91914	0.459529	0.421763	sigma factor 4
AT2G26850.1	AT2G26850	0	3	2	4	5	8	0.756216	1.86139	0.422512	F-box family protein
AT3G55890.1	AT3G55890	8	18	14	0	6	4	-0.227317	-1.81302	0.422893	Yippee family putative zinc-binding protein
AT5G01810.2	AT5G01810	247	206	399	184	169	184	5.75103	-0.460547	0.422893	CBL-interacting protein kinase 15
AT2G39700.1	AT2G39700	931	774	1117	559	667	527	6.21695	-0.50748	0.423174	expansin A4
AT4G26630.2	AT4G26630	46586	47430	55315	33404	38450	38509	12.3059	-0.267686	0.424415	DEK domain-containing chromatin associated protein
AT3G07960.1	AT3G07960	55	62	79	33	36	44	3.73253	-0.613144	0.425024	Phosphatidylinositol-4-phosphate 5-kinase family protein
AT3G25690.2	AT3G25690	1288	1028	1497	1609	1215	1408	7.40662	0.333747	0.42517	Hydroxyproline-rich glycoprotein family protein
AT4G15160.1	AT4G15160	57	12	65	24	19	20	2.92809	-0.869603	0.42517	Bifunctional inhibitor/lipid-transfer protein/seed storage 2S albumin superfamily protein
AT5G42380.1	AT5G42380	7	8	20	2	3	0	0.78185	-2.49673	0.42517	calmodulin like 37
AT5G51210.1	AT5G51210	3	3	1	0	0	0	1.11543	-4.2362	0.42517	oleosin3
AT1G17960.1	AT1G17960	25	16	58	17	11	8	0.643348	-1.20859	0.42582	Threonyl-tRNA synthetase
AT4G35770.1	AT4G35770	38	6	40	220	11	102	2.43942	2.22196	0.426256	Rhodanese/Cell cycle control phosphatase superfamily protein
AT5G60210.1	AT5G60210	603	517	731	390	417	491	6.68879	-0.331263	0.4277	ROP interactive partner 5
AT1G68825.1	AT1G68825	1	12	10	0	4	1	1.5737	-1.95941	0.429834	ROTUNDIFOLIA like 15
AT2G22670.4	AT2G22670	2337	2983	3680	1938	2268	2421	8.60491	-0.261758	0.430156	indoleacetic acid-induced protein 8
AT4G11150.1	AT4G11150	2630	2672	3600	2975	2852	3176	8.93038	0.198794	0.430156	vacuolar ATP synthase subunit E1
AT1G69600.1	AT1G69600	20	17	25	6	6	13	1.25735	-1.1164	0.43187	zinc finger homeodomain 1
AT1G79590.2	AT1G79590	85	114	137	69	81	62	3.64784	-0.485501	0.43187	syntaxin of plants 52
AT1G80270.1	AT1G80270	208	157	309	112	169	160	5.04083	-0.413784	0.43187	PENTATRICOPEPTIDE REPEAT 596
AT2G07680.1	AT2G07680	20	22	31	40	33	43	1.23924	0.851228	0.43187	multidrug resistance-associated protein 11
AT2G35800.1	AT2G35800	251	199	354	356	223	291	5.32891	0.310074	0.43187	mitochondrial substrate carrier family protein
AT2G37980.1	AT2G37980	1	3	3	0	0	0	-0.0823807	-4.21524	0.43187	O-fucosyltransferase family protein
AT4G00780.1	AT4G00780	146	134	130	81	70	71	3.92411	-0.728741	0.43187	TRAF-like family protein
AT4G14940.1	AT4G14940	6	10	9	12	21	13	0.975862	1.03799	0.43187	amine oxidase 1
AT4G15233.1	AT4G15233	3	4	10	9	9	15	0.750923	1.13473	0.43187	ABC-2 and Plant PDR ABC-type transporter family protein
AT4G23780.1	AT4G23780	2	2	7	0	1	0	-0.270423	-2.86851	0.43187	unknown protein
AT4G31380.1	AT4G31380	5	12	6	16	8	20	0.538375	1.08539	0.43187	FPF1-like protein 1
AT4G32050.1	AT4G32050	18	15	19	27	17	29	1.94175	0.663764	0.43187	neurochondrin family protein
AT4G37920.1	AT4G37920	85	53	97	86	99	102	3.73049	0.473335	0.43187	unknown protein
AT5G19790.1	AT5G19790	12	8	18	8	3	4	0.896963	-1.13338	0.43187	related to AP2 11
AT5G41880.1	AT5G41880	43	32	56	25	25	27	2.92679	-0.579869	0.43187	DNA primases;DNA primases
AT5G66005.3	AT5G66005	16	14	11	8	5	3	1.18879	-1.18162	0.43187	Expressed protein
AT5G49360.1	AT5G49360	25	37	35	107	30	61	4.26815	1.19969	0.432079	beta-xylosidase 1
AT3G17170.1	AT3G17170	3837	3075	4336	3735	4373	3762	9.52822	0.254245	0.433043	Translation elongation factor EF1B/ribosomal protein S6 family protein
AT5G47455.7	AT5G47455	13	22	33	10	13	12	1.94462	-0.766813	0.433043	unknown protein
AT3G51280.1	AT3G51280	187	180	242	118	167	115	4.91508	-0.429285	0.433866	Tetratricopeptide repeat (TPR)-like superfamily protein
AT4G14150.1	AT4G14150	116	82	130	63	66	74	4.06571	-0.509162	0.434027	phragmoplast-associated kinesin-related protein 1
AT1G74740.1	AT1G74740	102	123	134	176	130	150	4.48408	0.517496	0.434542	calcium-dependent protein kinase 30
AT3G48580.1	AT3G48580	0	1	0	0	3	7	0.170206	3.05776	0.434542	xyloglucan endotransglucosylase/hydrolase 11
AT1G63180.1	AT1G63180	68	39	96	139	49	104	3.02298	0.738491	0.434682	UDP-D-glucose/UDP-D-galactose 4-epimerase 3
AT2G21330.2	AT2G21330	603	474	710	752	751	671	7.15812	0.464999	0.43485	fructose-bisphosphate aldolase 1
AT1G78240.2	AT1G78240	289	300	407	385	367	391	5.00345	0.381706	0.435792	S-adenosyl-L-methionine-dependent methyltransferases superfamily protein
AT1G09812.1	AT1G09812	20	25	48	18	18	8	0.652273	-0.870717	0.435927	unknown protein
AT1G67180.1	AT1G67180	15	10	28	7	12	6	1.1968	-0.887245	0.436679	zinc finger (C3HC4-type RING finger) family protein / BRCT domain-containing protein
AT3G28455.1	AT3G28455	38	52	60	29	30	29	2.47592	-0.589802	0.436679	CLAVATA3/ESR-RELATED 25
AT4G29590.1	AT4G29590	14	23	25	13	12	5	1.72627	-0.862241	0.436679	S-adenosyl-L-methionine-dependent methyltransferases superfamily protein
AT5G16660.2	AT5G16660	260	249	303	319	273	298	5.46653	0.306684	0.436679	unknown protein
AT5G22810.1	AT5G22810	7	3	13	2	2	0	-0.592747	-2.20041	0.436679	GDSL-like Lipase/Acylhydrolase superfamily protein
AT5G49410.1	AT5G49410	11	8	14	4	2	3	0.250409	-1.6467	0.436679	unknown protein
AT5G59030.1	AT5G59030	874	636	1118	1058	858	923	7.25539	0.305825	0.436679	copper transporter 1
AT5G63670.1	AT5G63670	907	766	953	614	727	589	6.63086	-0.275658	0.437295	SPT4 homolog 2
AT5G39770.1	AT5G39770	21	16	26	15	10	4	0.487391	-0.927192	0.437726	Restriction endonuclease, type II-like superfamily protein
AT5G60490.1	AT5G60490	384	509	395	486	671	470	6.97766	0.478375	0.438572	FASCICLIN-like arabinogalactan-protein 12
AT3G55750.1	AT3G55750	1122	1245	1683	973	1063	955	8.4046	-0.253692	0.438728	Ribosomal protein L35Ae family protein
AT5G14910.1	AT5G14910	603	495	747	756	621	636	6.93921	0.311416	0.438728	Heavy metal transport/detoxification superfamily protein
AT5G62210.1	AT5G62210	675	984	1110	443	708	539	8.45184	-0.540643	0.438728	Embryo-specific protein 3, (ATS3)
AT3G15095.3	AT3G15095	8898	10010	10720	6603	7290	7347	10.3509	-0.315709	0.439058	unknown protein
AT4G17670.1	AT4G17670	175	367	339	139	247	169	6.1792	-0.504638	0.440029	Protein of unknown function (DUF581)
AT2G30860.2	AT2G30860	9942	8952	11453	4735	8136	5441	8.51293	-0.560765	0.440053	glutathione S-transferase PHI 9
AT1G51100.1	AT1G51100	101	90	120	130	98	131	4.4183	0.386119	0.440887	unknown protein
AT1G52590.1	AT1G52590	152	188	250	250	193	234	4.44141	0.385239	0.440887	Putative thiol-disulphide oxidoreductase DCC
AT2G45520.1	AT2G45520	3679	3769	4706	2750	3133	3317	8.99248	-0.226704	0.440887	unknown protein
AT4G27260.1	AT4G27260	845	739	953	1335	1114	1211	5.55638	0.703986	0.440887	Auxin-responsive GH3 family protein
AT4G39270.1	AT4G39270	15	21	25	39	22	33	2.07214	0.802763	0.440887	Leucine-rich repeat protein kinase family protein
AT5G19320.1	AT5G19320	261	254	320	149	215	223	5.21399	-0.334209	0.440887	RAN GTPase activating protein 2
AT5G52120.1	AT5G52120	12	8	9	19	18	16	1.21587	1.02829	0.440887	phloem protein 2-A14
AT1G66680.1	AT1G66680	159	193	211	219	194	212	4.68863	0.323744	0.440978	S-adenosyl-L-methionine-dependent methyltransferases superfamily protein
AT3G28850.1	AT3G28850	31	36	50	54	57	40	3.04254	0.548808	0.441086	Glutaredoxin family protein
AT5G64340.1	AT5G64340	215	215	276	240	295	246	4.9962	0.321551	0.441711	sequence-specific DNA binding transcription factors;transcription regulators
AT5G64341.1	AT5G64341	215	215	276	240	295	246	4.9962	0.321551	0.441711	conserved peptide upstream open reading frame 40
AT5G64342.1	AT5G64342	215	215	276	240	295	246	4.9962	0.321551	0.441711	conserved peptide upstream open reading frame 39
AT5G64343.1	AT5G64343	215	215	276	240	295	246	4.9962	0.321551	0.441711	conserved peptide upstream open reading frame 38
AT1G72730.1	AT1G72730	69	61	98	50	59	36	4.1609	-0.467335	0.441805	DEA(D/H)-box RNA helicase family protein
AT3G05910.1	AT3G05910	83	82	109	112	108	100	4.42317	0.402855	0.441805	Pectinacetylesterase family protein
AT3G17998.1	AT3G17998	411	298	698	296	295	215	6.45238	-0.586407	0.441805	conserved peptide upstream open reading frame 30
AT3G18035.1	AT3G18035	5108	4870	6552	3841	3833	4390	9.25703	-0.273946	0.441805	winged-helix DNA-binding transcription factor family protein
AT3G21670.1	AT3G21670	199	170	213	264	301	239	5.46991	0.63519	0.441805	Major facilitator superfamily protein
AT5G22800.1	AT5G22800	320	265	399	406	377	316	5.88993	0.343345	0.441805	Alanyl-tRNA synthetase, class IIc
AT5G57780.1	AT5G57780	2	3	8	10	11	6	0.982293	1.21458	0.441805	unknown protein
AT1G64600.1	AT1G64600	681	589	895	440	530	520	6.04513	-0.353538	0.441998	methyltransferases;copper ion binding
AT2G43970.2	AT2G43970	2052	1822	2612	2276	2066	2497	8.15885	0.260763	0.441998	RNA-binding protein
AT3G25560.2	AT3G25560	123	178	209	92	125	109	3.75198	-0.467781	0.441998	NSP-interacting kinase 2
AT4G27950.1	AT4G27950	7	4	5	12	11	8	2.50234	1.11055	0.441998	cytokinin response factor 4
AT4G29360.2	AT4G29360	142	169	202	126	129	102	4.85398	-0.346149	0.441998	O-Glycosyl hydrolases family 17 protein
AT5G10290.1	AT5G10290	427	418	604	317	375	353	5.37456	-0.287008	0.442134	leucine-rich repeat transmembrane protein kinase family protein
AT3G18000.1	AT3G18000	411	298	698	296	295	215	6.45383	-0.586403	0.442581	S-adenosyl-L-methionine-dependent methyltransferases superfamily protein
AT1G24147.1	AT1G24147	0	0	2	3	12	1	-0.0986605	2.98516	0.442858	unknown protein
AT3G06720.1	AT3G06720	206	183	281	263	204	244	5.23161	0.272036	0.442858	importin alpha isoform 1
AT4G13850.4	AT4G13850	3649	3148	4564	2816	2842	2351	8.98279	-0.321917	0.442858	glycine-rich RNA-binding protein 2
AT4G24460.1	AT4G24460	58	69	54	36	30	45	3.04569	-0.545667	0.442858	CRT (chloroquine-resistance transporter)-like transporter 2
AT5G61820.1	AT5G61820	57	63	87	93	85	104	3.61489	0.63113	0.442858	unknown protein
AT4G24260.1	AT4G24260	12	27	29	8	14	9	1.84361	-0.947369	0.444211	glycosyl hydrolase 9A3
AT5G38410.1	AT5G38410	8874	7297	9486	10902	9660	8923	10.8214	0.373702	0.445449	Ribulose bisphosphate carboxylase (small chain) family protein
AT3G62590.1	AT3G62590	74	114	107	37	80	59	3.88431	-0.583748	0.445518	alpha/beta-Hydrolases superfamily protein
AT4G39800.1	AT4G39800	1192	2129	1604	777	1342	968	8.60559	-0.533375	0.445518	myo-inositol-1-phosphate synthase 1
AT5G02560.2	AT5G02560	28	24	53	9	27	17	2.01634	-0.782568	0.445518	histone H2A 12
AT5G47520.1	AT5G47520	70	87	106	57	59	54	4.06371	-0.450021	0.445518	RAB GTPase homolog A5A
ATCG00530.1	ATCG00530	681	597	690	1077	757	811	6.82445	0.594358	0.445518	CemA-like proton extrusion protein-related
AT1G65720.1	AT1G65720	1879	1865	2459	1607	1655	1552	7.88263	-0.186743	0.445579	unknown protein
AT2G21800.2	AT2G21800	35	28	45	14	17	25	2.41916	-0.758765	0.445837	essential meiotic endonuclease 1A
AT2G41790.1	AT2G41790	96	116	156	91	84	73	3.93583	-0.38507	0.445837	Insulinase (Peptidase family M16) family protein
AT1G48480.1	AT1G48480	704	576	708	473	533	461	7.25047	-0.270621	0.44591	receptor-like kinase 1
AT1G56580.1	AT1G56580	548	521	748	314	518	429	7.2479	-0.345883	0.44591	Protein of unknown function, DUF538
AT1G61870.1	AT1G61870	166	141	179	93	114	126	5.67063	-0.372132	0.44591	pentatricopeptide repeat 336
AT2G23350.1	AT2G23350	1173	964	1520	1278	1246	1384	8.18511	0.284492	0.44591	poly(A) binding protein 4
AT2G23430.1	AT2G23430	50	32	40	51	56	58	4.31599	0.602143	0.44591	Cyclin-dependent kinase inhibitor family protein
AT2G27590.1	AT2G27590	59	50	89	47	39	20	3.12763	-0.704153	0.44591	S-adenosyl-L-methionine-dependent methyltransferases superfamily protein
AT2G41640.1	AT2G41640	2	1	5	0	0	0	-0.700923	-4.37128	0.44591	Glycosyltransferase family 61 protein
AT3G09050.1	AT3G09050	55	35	63	53	70	72	3.39453	0.532664	0.44591	unknown protein
AT3G11720.1	AT3G11720	8	4	17	9	28	12	2.06334	0.943297	0.44591	Polyketide cyclase/dehydrase and lipid transport superfamily protein
AT3G14960.1	AT3G14960	39	49	59	36	26	23	2.91512	-0.608754	0.44591	Galactosyltransferase family protein
AT4G26780.1	AT4G26780	167	143	244	91	143	128	4.8703	-0.422895	0.44591	Co-chaperone GrpE family protein
AT5G03180.1	AT5G03180	133	78	128	58	69	85	3.43004	-0.497757	0.44591	RING/U-box superfamily protein
AT5G07660.1	AT5G07660	190	189	255	142	120	146	4.5292	-0.453052	0.44591	structural maintenance of chromosomes 6A
AT5G12410.1	AT5G12410	4548	3781	4782	2716	3192	3309	9.0454	-0.338979	0.44591	THUMP domain-containing protein
AT5G15520.1	AT5G15520	158	192	247	120	149	144	5.49539	-0.350441	0.44591	Ribosomal protein S19e family protein
AT5G19370.1	AT5G19370	43	49	75	88	75	49	3.66748	0.53297	0.44591	rhodanese-like domain-containing protein / PPIC-type PPIASE domain-containing protein
AT5G45700.1	AT5G45700	77	116	164	98	63	48	4.48708	-0.575035	0.44591	Haloacid dehalogenase-like hydrolase (HAD) superfamily protein
AT1G80420.1	AT1G80420	229	185	298	383	217	282	4.58999	0.502238	0.44603	BRCT domain-containing DNA repair protein
AT2G01150.1	AT2G01150	95	158	154	66	100	97	3.9867	-0.462072	0.4469	RING-H2 finger protein 2B
AT3G53200.1	AT3G53200	4	1	1	8	5	6	-1.52641	1.76701	0.4469	myb domain protein 27
ATCG00280.1	ATCG00280	2386	1723	1925	3308	2707	2849	8.70437	0.712784	0.4469	photosystem II reaction center protein C
AT3G51840.1	AT3G51840	627	525	789	921	596	656	6.43762	0.351105	0.447085	acyl-CoA oxidase 4
AT1G01070.1	AT1G01070	98	108	137	118	169	142	1.71956	0.498682	0.447445	nodulin MtN21 /EamA-like transporter family protein
AT1G74430.1	AT1G74430	78	99	121	52	78	63	4.3476	-0.448469	0.447445	myb domain protein 95
AT4G19410.1	AT4G19410	71	80	99	122	88	93	4.16724	0.456735	0.447445	Pectinacetylesterase family protein
AT2G04495.1	AT2G04495	2	0	0	6	8	4	0.696575	3.08152	0.448088	unknown protein
AT2G48070.2	AT2G48070	129	108	156	150	140	149	4.43478	0.340213	0.448088	resistance to phytophthora 1
AT2G41990.1	AT2G41990	13	8	14	3	6	5	3.86264	-1.12257	0.44832	unknown protein
AT3G57060.2	AT3G57060	104	129	142	67	110	81	4.2582	-0.367501	0.44832	binding
AT2G39420.1	AT2G39420	142	140	213	97	121	109	5.0605	-0.410646	0.449226	alpha/beta-Hydrolases superfamily protein
AT5G51110.1	AT5G51110	523	367	574	665	469	488	6.48368	0.332298	0.449582	Transcriptional coactivator/pterin dehydratase
AT3G19520.1	AT3G19520	113	112	175	92	101	86	4.62077	-0.333709	0.44984	Protein of unknown function (DUF626)
AT1G17710.1	AT1G17710	181	173	263	311	348	297	2.72051	0.820224	0.450125	Pyridoxal phosphate phosphatase-related protein
AT3G11110.1	AT3G11110	2	5	5	1	1	0	-0.376326	-2.21979	0.450125	RING/U-box superfamily protein
AT4G13500.1	AT4G13500	122	101	166	178	130	130	4.71067	0.359655	0.450125	unknown protein
AT5G49160.1	AT5G49160	853	777	1053	551	657	670	6.79475	-0.33662	0.450125	methyltransferase 1
AT5G57340.1	AT5G57340	21	15	20	29	33	27	2.02986	0.836502	0.450125	unknown protein
AT1G19350.4	AT1G19350	220	254	296	181	181	168	5.02595	-0.364616	0.451388	Brassinosteroid signalling positive regulator (BZR1) family protein
AT1G54200.1	AT1G54200	66	78	126	52	64	60	4.01004	-0.426149	0.451388	unknown protein
AT2G39870.1	AT2G39870	626	543	633	430	499	336	6.46357	-0.346503	0.451619	unknown protein
AT4G39630.1	AT4G39630	18	19	30	11	11	10	1.71925	-0.871749	0.452288	unknown protein
AT2G39510.1	AT2G39510	560	344	794	760	605	638	4.32114	0.44953	0.452364	nodulin MtN21 /EamA-like transporter family protein
AT5G11470.1	AT5G11470	35	26	25	30	57	36	2.29818	0.671714	0.453513	bromo-adjacent homology (BAH) domain-containing protein
AT4G05130.1	AT4G05130	1	0	0	8	1	1	-1.05391	3.06528	0.453584	equilibrative nucleoside transporter 4
AT4G18130.1	AT4G18130	159	173	167	118	132	104	3.97585	-0.33153	0.454488	phytochrome E
AT4G22305.1	AT4G22305	14	9	19	34	20	19	1.39948	0.986028	0.454488	alpha/beta-Hydrolases superfamily protein
AT3G15360.1	AT3G15360	604	459	697	723	555	608	7.00663	0.283946	0.454881	thioredoxin M-type 4
AT5G41410.1	AT5G41410	47	40	41	69	45	65	2.85705	0.647907	0.454881	POX (plant homeobox) family protein
AT4G39010.1	AT4G39010	5	7	3	2	1	1	1.17243	-1.65668	0.455254	glycosyl hydrolase 9B18
AT1G60610.1	AT1G60610	129	136	160	94	116	76	4.10551	-0.399235	0.455761	SBP (S-ribonuclease binding protein) family protein
AT2G17390.1	AT2G17390	616	578	940	678	702	781	7.4244	0.210924	0.455849	ankyrin repeat-containing 2B
AT1G13245.1	AT1G13245	9	12	19	30	20	15	4.79139	0.885141	0.456923	ROTUNDIFOLIA like 17
AT1G22350.1	AT1G22350	3	2	5	7	12	4	1.05745	1.34947	0.456923	pseudogene
AT3G02190.1	AT3G02190	165	167	220	115	151	130	4.63719	-0.30076	0.456923	Ribosomal protein L39 family protein
AT3G16170.1	AT3G16170	141	202	293	130	161	130	4.40931	-0.401901	0.456923	AMP-dependent synthetase and ligase family protein
AT3G62190.1	AT3G62190	78	50	74	44	42	48	3.47041	-0.413818	0.456923	Chaperone DnaJ-domain superfamily protein
AT5G07990.1	AT5G07990	27	31	21	18	8	12	3.4727	-0.897725	0.456923	Cytochrome P450 superfamily protein
AT1G62950.1	AT1G62950	15	25	21	4	15	8	2.08361	-1.00637	0.456935	leucine-rich repeat transmembrane protein kinase family protein
AT1G30530.1	AT1G30530	221	338	385	164	281	177	6.02141	-0.428507	0.458129	UDP-glucosyl transferase 78D1
AT3G21680.1	AT3G21680	0	2	1	5	3	10	-0.425795	2.60333	0.458539	unknown protein
AT3G62610.1	AT3G62610	2	6	6	1	1	0	0.714119	-2.43547	0.45995	myb domain protein 11
AT1G55152.1	AT1G55152	36	36	47	25	19	23	1.96688	-0.646259	0.461949	unknown protein
AT1G01695.1	AT1G01695	3	0	0	4	3	9	-0.609048	2.42437	0.462496	Phosphatidylinositol N-acetyglucosaminlytransferase subunit P-related
AT2G01120.2	AT2G01120	53	50	94	33	44	43	3.43354	-0.518768	0.462496	origin recognition complex subunit 4
AT2G41170.1	AT2G41170	13	37	35	18	16	7	2.60748	-0.871167	0.462496	F-box family protein
AT2G43900.1	AT2G43900	47	56	44	56	64	68	3.0768	0.51368	0.462496	Endonuclease/exonuclease/phosphatase family protein
AT5G28646.2	AT5G28646	34	45	46	12	29	19	1.88954	-0.891948	0.462496	TPX2 (targeting protein for Xklp2) protein family
AT5G42250.1	AT5G42250	1	0	5	5	7	5	1.41867	1.64374	0.462496	Zinc-binding alcohol dehydrogenase family protein
AT5G50230.1	AT5G50230	75	77	138	62	57	69	3.68554	-0.428743	0.462496	Transducin/WD40 repeat-like superfamily protein
AT5G55210.1	AT5G55210	187	180	276	173	152	125	5.17302	-0.326708	0.462496	unknown protein
AT5G67140.1	AT5G67140	4	13	11	3	4	2	0.20535	-1.43038	0.462496	F-box/RNI-like superfamily protein
AT5G67245.1	AT5G67245	157	214	281	236	262	240	4.13956	0.363892	0.462496	unknown protein
ATCG00360.1	ATCG00360	72	67	77	104	97	105	3.88695	0.670556	0.462496	Tetratricopeptide repeat (TPR)-like superfamily protein
AT1G66810.1	AT1G66810	5	3	7	0	2	1	-1.04011	-2.01194	0.463191	Zinc finger C-x8-C-x5-C-x3-H type family protein
AT2G33420.1	AT2G33420	2	13	7	9	21	18	2.00954	1.26128	0.463584	Protein of unknown function (DUF810)
AT2G22230.1	AT2G22230	119	161	166	95	113	107	5.11287	-0.330124	0.464021	Thioesterase superfamily protein
AT3G05090.1	AT3G05090	192	202	285	268	231	236	4.96445	0.299647	0.464021	Transducin/WD40 repeat-like superfamily protein
AT4G34050.2	AT4G34050	158	179	218	193	277	175	4.71401	0.389857	0.464021	S-adenosyl-L-methionine-dependent methyltransferases superfamily protein
AT4G37370.1	AT4G37370	11	3	14	22	30	9	1.02206	1.31631	0.464021	cytochrome P450, family 81, subfamily D, polypeptide 8
AT5G57655.1	AT5G57655	1198	898	1801	1948	1083	1523	6.83604	0.436348	0.464021	xylose isomerase family protein
AT1G09830.1	AT1G09830	69	48	78	42	47	34	3.29356	-0.482825	0.464741	Glycinamide ribonucleotide (GAR) synthetase
AT1G01160.2	AT1G01160	565	509	769	492	446	422	6.08475	-0.251305	0.464836	GRF1-interacting factor 2
AT3G56630.1	AT3G56630	100	95	141	141	112	127	4.18131	0.362791	0.465803	cytochrome P450, family 94, subfamily D, polypeptide 2
AT4G35980.1	AT4G35980	57	62	94	53	43	35	3.20929	-0.511365	0.4661	unknown protein
AT2G38880.7	AT2G38880	159	194	231	134	153	130	4.8278	-0.309159	0.466744	nuclear factor Y, subunit B1
AT3G13440.1	AT3G13440	244	238	350	179	218	204	5.17405	-0.284669	0.466744	S-adenosyl-L-methionine-dependent methyltransferases superfamily protein
AT4G16265.1	AT4G16265	35	34	56	23	27	18	2.65088	-0.686101	0.466744	RNA polymerases M/15 Kd subunit
AT4G30960.1	AT4G30960	3349	4271	4783	2234	3051	3266	9.07143	-0.366252	0.466744	SOS3-interacting protein 3
AT5G62710.1	AT5G62710	329	300	436	231	276	258	5.80187	-0.294554	0.466744	Leucine-rich repeat protein kinase family protein
ATCG00180.1	ATCG00180	726	533	635	912	787	915	7.00026	0.628323	0.466744	DNA-directed RNA polymerase family protein
AT4G35090.1	AT4G35090	743	681	888	1078	796	1008	7.22241	0.496931	0.466766	catalase 2
ATCG01070.1	ATCG01070	201	173	233	342	238	237	5.08179	0.608012	0.467343	NADH-ubiquinone/plastoquinone oxidoreductase chain 4L
AT5G05510.1	AT5G05510	33	26	48	20	22	15	2.19442	-0.715327	0.468174	Mad3/BUB1 homology region 1
AT4G14330.1	AT4G14330	898	888	1221	649	726	688	7.15	-0.361709	0.468558	P-loop containing nucleoside triphosphate hydrolases superfamily protein
AT2G38160.2	AT2G38160	14	15	21	8	9	4	0.97652	-1.05692	0.468674	unknown protein
AT5G15960.1	AT5G15960	62	101	98	41	48	47	5.37297	-0.772831	0.468826	stress-responsive protein (KIN1) / stress-induced protein (KIN1)
AT2G01350.4	AT2G01350	245	232	301	176	199	187	4.85273	-0.292545	0.470086	quinolinate phoshoribosyltransferase
AT2G07732.1	AT2G07732	115	92	93	153	153	101	4.18588	0.594409	0.470086	Ribulose bisphosphate carboxylase large chain, catalytic domain
AT3G20790.1	AT3G20790	134	127	166	92	117	86	4.21688	-0.356921	0.470086	NAD(P)-binding Rossmann-fold superfamily protein
AT5G07940.2	AT5G07940	90	68	100	44	56	64	3.12605	-0.474201	0.470086	unknown protein
AT5G56600.1	AT5G56600	564	597	711	386	555	418	5.89114	-0.291992	0.470086	profilin 3
AT1G55900.1	AT1G55900	69	92	85	48	63	53	3.41605	-0.417027	0.471351	Haloacid dehalogenase-like hydrolase (HAD) superfamily protein
AT2G43980.1	AT2G43980	53	57	66	31	42	37	2.47728	-0.502958	0.471351	inositol 1,3,4-trisphosphate 5/6-kinase 4
AT2G29260.1	AT2G29260	27	19	32	17	12	9	1.51946	-0.846918	0.471637	NAD(P)-binding Rossmann-fold superfamily protein
AT3G28960.1	AT3G28960	12	15	19	23	39	24	0.288468	1.07286	0.472373	Transmembrane amino acid transporter family protein
AT5G35750.1	AT5G35750	83	97	127	124	113	133	3.84343	0.452003	0.472373	histidine kinase 2
AT5G54650.2	AT5G54650	26	30	33	11	15	24	2.5655	-0.653141	0.472373	formin homology5
ATCG00700.1	ATCG00700	30	29	27	58	39	41	2.63757	0.840787	0.472373	photosystem II reaction center protein N
AT2G27170.2	AT2G27170	1003	990	1401	743	834	853	7.06327	-0.29764	0.472621	Structural maintenance of chromosomes (SMC) family protein
AT5G57160.1	AT5G57160	83	74	115	54	74	53	3.19836	-0.403975	0.472621	DNA ligase IV
AT1G35720.1	AT1G35720	403	404	629	309	288	308	7.19669	-0.471583	0.473016	annexin 1
AT4G33320.1	AT4G33320	0	0	0	2	4	2	-0.950936	4.56508	0.473201	Plant protein of unknown function (DUF641)
AT3G19290.3	AT3G19290	167	157	276	144	143	128	4.24997	-0.336195	0.473283	ABRE binding factor 4
AT1G60630.1	AT1G60630	3	5	3	0	1	1	1.73958	-2.10598	0.473632	Leucine-rich repeat protein kinase family protein
AT3G55490.1	AT3G55490	25	37	48	6	29	24	2.47284	-0.714461	0.473955	GINS complex protein
AT4G39110.1	AT4G39110	16	21	14	9	8	7	0.9644	-0.915605	0.473955	Malectin/receptor-like protein kinase family protein
AT1G71720.1	AT1G71720	174	170	261	216	228	213	4.8324	0.306233	0.474635	Nucleic acid-binding proteins superfamily
AT1G79360.1	AT1G79360	21	14	28	33	29	30	3.02131	0.732382	0.476499	organic cation/carnitine transporter 2
AT5G56940.1	AT5G56940	128	128	186	110	105	97	4.36889	-0.318591	0.476505	Ribosomal protein S16 family protein
AT1G20720.1	AT1G20720	16	11	15	1	7	10	1.01446	-1.0345	0.477469	RAD3-like DNA-binding helicase protein
AT1G51670.1	AT1G51670	8	6	9	3	1	3	1.82028	-1.49017	0.477469	unknown protein
AT2G38080.1	AT2G38080	60	86	61	104	102	107	2.71543	0.739778	0.477469	Laccase/Diphenol oxidase family protein
AT3G58930.1	AT3G58930	35	29	39	15	20	24	2.10849	-0.623877	0.477469	F-box/RNI-like superfamily protein
AT5G37380.5	AT5G37380	155	128	190	118	103	111	4.13424	-0.328278	0.477469	Chaperone DnaJ-domain superfamily protein
AT4G11600.1	AT4G11600	178	188	225	111	155	132	4.72688	-0.398216	0.478193	glutathione peroxidase 6
AT5G16600.1	AT5G16600	56	60	60	93	90	58	2.01145	0.615529	0.479166	myb domain protein 43
AT1G67750.1	AT1G67750	592	977	895	446	687	446	6.84903	-0.485762	0.479389	Pectate lyase family protein
AT3G03060.1	AT3G03060	69	62	74	41	52	34	3.65832	-0.519066	0.479389	P-loop containing nucleoside triphosphate hydrolases superfamily protein
AT5G02820.1	AT5G02820	31	36	47	25	23	19	2.33259	-0.583746	0.479389	Spo11/DNA topoisomerase VI, subunit A protein
AT4G00560.4	AT4G00560	57	43	67	46	27	25	2.60764	-0.58312	0.479463	NAD(P)-binding Rossmann-fold superfamily protein
AT4G10613.1	AT4G10613	5	6	0	1	0	0	-1.39337	-2.97501	0.479463	RNA-directed DNA polymerase (reverse transcriptase)-related family protein
AT3G56160.1	AT3G56160	318	268	356	222	250	192	5.19598	-0.330228	0.479721	Sodium Bile acid symporter family
AT1G74458.1	AT1G74458	15	15	14	7	7	6	-0.01963	-0.956644	0.481155	unknown protein
AT1G75350.1	AT1G75350	1664	1331	2000	1960	1542	1698	8.48722	0.24347	0.481155	Ribosomal protein L31
AT1G01930.1	AT1G01930	61	69	75	48	49	37	3.07665	-0.439603	0.481906	zinc finger protein-related
AT3G55330.1	AT3G55330	621	435	724	671	630	641	6.73131	0.312805	0.481906	PsbP-like protein 1
AT4G13150.1	AT4G13150	54	41	52	30	36	20	2.65122	-0.601063	0.481906	unknown protein
AT1G17560.1	AT1G17560	404	419	584	339	314	331	5.52503	-0.330324	0.482161	Ribosomal protein L14p/L23e family protein
AT3G16950.2	AT3G16950	515	473	659	592	591	550	6.30649	0.254444	0.482161	lipoamide dehydrogenase 1
AT2G28330.1	AT2G28330	265	230	345	187	216	154	5.22657	-0.409089	0.482411	unknown protein
AT1G08845.1	AT1G08845	108	80	126	70	60	65	3.70574	-0.502426	0.485132	Ribosomal L18p/L5e family protein
AT1G02640.1	AT1G02640	506	331	551	1011	415	725	5.493	0.824671	0.485634	beta-xylosidase 2
AT2G28630.1	AT2G28630	160	189	203	128	105	101	4.91963	-0.555112	0.485634	3-ketoacyl-CoA synthase 12
AT3G11500.1	AT3G11500	318	276	470	254	288	203	5.62735	-0.3215	0.486399	Small nuclear ribonucleoprotein family protein
AT1G10180.1	AT1G10180	50	65	81	47	41	37	2.88343	-0.467024	0.486807	unknown protein
AT1G19000.2	AT1G19000	1980	1735	2621	2471	2069	2219	7.60858	0.281845	0.486807	Homeodomain-like superfamily protein
AT3G19050.1	AT3G19050	376	299	418	229	252	269	5.50265	-0.366138	0.487319	phragmoplast orienting kinesin 2
AT3G59420.1	AT3G59420	34	36	36	27	22	14	3.17919	-0.576397	0.487319	crinkly4
AT5G24155.1	AT5G24155	15	7	24	30	24	20	1.56396	0.886378	0.488129	FAD/NAD(P)-binding oxidoreductase family protein
AT4G08160.2	AT4G08160	39	44	50	66	67	68	3.02289	0.766258	0.488981	glycosyl hydrolase family 10 protein / carbohydrate-binding domain-containing protein
AT2G45080.1	AT2G45080	3	0	5	0	0	0	-0.555237	-4.35985	0.489283	cyclin p3;1
AT3G58120.1	AT3G58120	59	81	61	93	123	80	5.45066	0.702101	0.489311	Basic-leucine zipper (bZIP) transcription factor family protein
AT3G62930.1	AT3G62930	14	6	9	26	9	25	-0.244246	1.21167	0.489311	Thioredoxin superfamily protein
AT4G13970.1	AT4G13970	100	94	119	65	84	58	3.59602	-0.421838	0.489463	zinc ion binding
AT4G38410.1	AT4G38410	2	2	1	17	2	1	0.416522	2.08321	0.489463	Dehydrin family protein
AT1G04430.2	AT1G04430	87	106	116	92	148	123	4.57259	0.401895	0.490147	S-adenosyl-L-methionine-dependent methyltransferases superfamily protein
AT3G53530.2	AT3G53530	142	115	213	97	119	87	4.23601	-0.437618	0.490592	Chloroplast-targeted copper chaperone protein
AT3G49120.1	AT3G49120	23	33	17	14	15	7	3.32452	-0.874885	0.490846	peroxidase CB
AT3G59890.2	AT3G59890	78	79	63	46	46	50	3.71807	-0.474919	0.490846	Dihydrodipicolinate reductase, bacterial/plant
AT5G05460.1	AT5G05460	77	51	67	99	78	98	2.62572	0.665447	0.491066	Glycosyl hydrolase family 85
AT5G64200.2	AT5G64200	161	191	280	150	170	140	4.8171	-0.271552	0.491429	ortholog of human splicing factor SC35
AT3G55460.1	AT3G55460	688	586	853	562	538	501	6.36963	-0.227413	0.492674	SC35-like splicing factor 30
AT1G26260.2	AT1G26260	367	353	494	221	251	328	5.23902	-0.418192	0.493079	cryptochrome-interacting basic-helix-loop-helix 5
AT1G54960.1	AT1G54960	49	29	66	19	27	38	2.67777	-0.582109	0.493079	NPK1-related protein kinase 2
AT2G42190.1	AT2G42190	3251	2842	4304	3317	3355	4030	9.11309	0.229482	0.493079	unknown protein
AT5G44310.2	AT5G44310	0	0	0	13	0	2	-1.04876	5.46634	0.493079	Late embryogenesis abundant protein (LEA) family protein
AT5G10140.1	AT5G10140	1	1	0	5	2	6	0.881607	2.63532	0.493391	K-box region and MADS-box transcription factor family protein
AT3G03460.1	AT3G03460	31	39	59	16	33	25	3.09071	-0.612185	0.493562	unknown protein
AT5G06100.1	AT5G06100	4	8	8	15	7	16	0.0687978	1.09107	0.493562	myb domain protein 33
AT4G25050.1	AT4G25050	2070	1546	2472	2240	2225	1990	8.55634	0.270462	0.493588	acyl carrier protein 4
AT5G17230.3	AT5G17230	215	189	288	274	227	271	5.42579	0.345325	0.493673	PHYTOENE SYNTHASE
AT3G06220.1	AT3G06220	29	51	53	20	33	21	2.40347	-0.670801	0.495099	AP2/B3-like transcriptional factor family protein
AT2G26170.1	AT2G26170	45	55	55	35	42	17	3.12627	-0.552109	0.495203	cytochrome P450, family 711, subfamily A, polypeptide 1
AT5G38420.1	AT5G38420	2206	1779	2417	2870	2405	2095	8.73048	0.379598	0.495203	Ribulose bisphosphate carboxylase (small chain) family protein
AT5G22580.1	AT5G22580	2894	3333	4008	2202	2731	2401	10.0123	-0.307175	0.495231	Stress responsive A/B Barrel Domain
AT5G15470.1	AT5G15470	82	88	147	108	127	122	4.37526	0.363037	0.495429	galacturonosyltransferase 14
AT1G11475.1	AT1G11475	167	169	247	144	143	110	4.61726	-0.368076	0.496341	RNA polymerases N / 8 kDa subunit
AT2G37040.1	AT2G37040	134	199	192	207	270	182	5.01628	0.489688	0.496341	PHE ammonia lyase 1
AT3G51820.1	AT3G51820	308	262	398	363	341	317	5.97698	0.261505	0.496341	UbiA prenyltransferase family protein
AT5G41770.1	AT5G41770	292	252	372	199	250	224	5.60263	-0.263136	0.496341	crooked neck protein, putative / cell cycle protein, putative
AT3G19440.1	AT3G19440	5	8	27	4	10	3	1.36491	-1.02049	0.496881	Pseudouridine synthase family protein
AT4G21070.1	AT4G21070	67	54	85	37	39	55	3.45579	-0.468394	0.496881	breast cancer susceptibility1
AT4G32208.1	AT4G32208	693	700	867	474	629	499	6.53091	-0.324287	0.497354	heat shock protein 70 (Hsp 70) family protein
AT5G09250.1	AT5G09250	130	165	206	122	139	87	4.39984	-0.346123	0.497472	ssDNA-binding transcriptional regulator
AT5G65220.1	AT5G65220	3108	2485	3494	3040	2808	3516	9.52729	0.22265	0.497918	Ribosomal L29 family protein
AT1G15290.1	AT1G15290	971	926	1270	1029	1148	1214	7.3793	0.279426	0.498096	Tetratricopeptide repeat (TPR)-like superfamily protein
AT1G52320.2	AT1G52320	169	152	200	204	194	168	4.19234	0.29644	0.498096	unknown protein
AT3G50230.1	AT3G50230	3	3	11	0	2	1	0.91692	-2.15124	0.498096	Leucine-rich repeat protein kinase family protein
AT4G31780.2	AT4G31780	90	82	134	120	108	118	3.51827	0.365594	0.498096	monogalactosyl diacylglycerol synthase 1
AT5G25390.1	AT5G25390	20	35	54	8	21	20	1.67658	-0.949433	0.498096	Integrase-type DNA-binding superfamily protein
AT4G23420.1	AT4G23420	22	43	54	58	76	44	2.03029	0.764928	0.498714	NAD(P)-binding Rossmann-fold superfamily protein
AT3G53510.1	AT3G53510	35	49	61	34	19	32	2.2773	-0.584506	0.498788	ABC-2 type transporter family protein
AT5G47370.1	AT5G47370	255	221	271	183	216	113	5.62292	-0.37669	0.498913	Homeobox-leucine zipper protein 4 (HB-4) / HD-ZIP protein
AT3G01620.1	AT3G01620	5	2	6	1	1	0	-0.767856	-2.31843	0.499029	beta-1,4-N-acetylglucosaminyltransferase family protein
AT5G16860.1	AT5G16860	26	17	27	12	15	9	1.99428	-0.775146	0.499029	Tetratricopeptide repeat (TPR)-like superfamily protein
AT1G09450.1	AT1G09450	9	13	20	8	5	5	1.24337	-1.0191	0.49911	Protein kinase superfamily protein
AT2G24440.1	AT2G24440	198	232	300	152	188	170	5.5575	-0.336801	0.49911	selenium binding
AT5G52050.1	AT5G52050	6	3	7	8	17	10	0.935212	1.29102	0.49911	MATE efflux family protein
ATCG00720.1	ATCG00720	635	425	586	876	723	680	6.57143	0.641105	0.499261	photosynthetic electron transfer B
AT1G53770.1	AT1G53770	10	20	9	25	16	23	1.30142	0.862877	0.501276	O-fucosyltransferase family protein
AT1G72490.1	AT1G72490	7	9	11	3	1	3	0.397535	-1.71595	0.501276	unknown protein
AT5G54880.1	AT5G54880	16	16	21	6	9	10	1.60819	-0.896323	0.501276	DTW domain-containing protein
AT1G03180.1	AT1G03180	1	7	4	1	0	1	-0.156539	-2.23456	0.503172	unknown protein
AT1G01630.1	AT1G01630	28	23	39	35	53	30	3.13673	0.571341	0.503341	Sec14p-like phosphatidylinositol transfer family protein
AT2G22400.1	AT2G22400	326	293	406	249	240	255	5.4401	-0.281669	0.503652	S-adenosyl-L-methionine-dependent methyltransferases superfamily protein
AT2G22970.1	AT2G22970	76	84	101	46	71	57	4.99524	-0.409361	0.50367	serine carboxypeptidase-like 11
AT2G29550.1	AT2G29550	852	827	1073	608	787	692	7.25135	-0.223523	0.504541	tubulin beta-7 chain
AT2G42220.1	AT2G42220	200	189	286	279	221	255	6.02552	0.350809	0.504541	Rhodanese/Cell cycle control phosphatase superfamily protein
AT2G42880.1	AT2G42880	117	117	167	73	103	98	3.8248	-0.366777	0.505255	MAP kinase 20
AT1G71270.1	AT1G71270	34	51	68	60	64	57	3.14058	0.424632	0.505473	Vps52 / Sac2 family
AT3G06670.2	AT3G06670	197	207	307	270	231	296	4.80787	0.35529	0.505473	binding
AT4G33680.1	AT4G33680	235	213	256	153	182	157	5.44978	-0.347119	0.506258	Pyridoxal phosphate (PLP)-dependent transferases superfamily protein
AT3G07810.2	AT3G07810	1505	1515	2149	1913	1866	1693	8.07785	0.268026	0.506419	RNA-binding (RRM/RBD/RNP motifs) family protein
AT3G13175.1	AT3G13175	71	51	79	45	37	32	3.26677	-0.634541	0.507245	unknown protein
AT2G45470.1	AT2G45470	6239	5633	7079	4408	5297	4795	9.5013	-0.215431	0.50729	FASCICLIN-like arabinogalactan protein 8
AT1G50010.1	AT1G50010	2791	2961	3591	2528	2680	1987	9.12321	-0.203932	0.507346	tubulin alpha-2 chain
AT5G24010.1	AT5G24010	13	13	16	13	27	31	1.04254	0.924532	0.507346	Protein kinase superfamily protein
AT3G46900.1	AT3G46900	10	4	14	3	2	3	1.26369	-1.56098	0.508367	copper transporter 2
AT4G19420.2	AT4G19420	29	39	42	49	55	52	3.05337	0.674649	0.508367	Pectinacetylesterase family protein
AT5G67610.1	AT5G67610	26	36	58	57	48	45	3.12884	0.513285	0.508367	Uncharacterized conserved protein (DUF2215)
AT3G27850.1	AT3G27850	4660	3677	5406	4708	4659	4642	10.2129	0.20902	0.508497	ribosomal protein L12-C
AT3G43960.1	AT3G43960	8	13	8	2	5	5	4.70465	-1.07724	0.508497	Cysteine proteinases superfamily protein
AT3G59630.1	AT3G59630	54	27	55	24	24	32	2.51494	-0.578619	0.508497	diphthamide synthesis DPH2 family protein
AT4G00090.1	AT4G00090	20	31	31	36	28	44	2.41619	0.571481	0.508497	Transducin/WD40 repeat-like superfamily protein
AT4G10060.1	AT4G10060	139	98	263	184	177	206	5.15835	0.401076	0.508497	Beta-glucosidase, GBA2 type family protein
AT4G20720.1	AT4G20720	91	123	125	81	75	76	3.65678	-0.375341	0.508497	dentin sialophosphoprotein-related
AT4G39510.1	AT4G39510	96	77	126	49	64	61	4.87261	-0.592831	0.508497	cytochrome P450, family 96, subfamily A, polypeptide 12
AT5G19300.1	AT5G19300	480	448	665	369	434	353	6.17834	-0.277644	0.508497	unknown protein
AT2G19810.1	AT2G19810	83	59	99	66	37	40	4.24903	-0.562763	0.508831	CCCH-type zinc finger family protein
AT2G45710.1	AT2G45710	237	232	308	182	207	176	5.37212	-0.281158	0.508831	Zinc-binding ribosomal protein family protein
AT4G33950.1	AT4G33950	50	61	74	68	85	99	3.25886	0.62237	0.508831	Protein kinase superfamily protein
AT4G36690.4	AT4G36690	2068	1912	2359	1489	1651	1496	7.74031	-0.280642	0.508831	U2 snRNP auxilliary factor, large subunit, splicing factor
AT5G11000.1	AT5G11000	1698	1794	2174	1199	1531	1400	7.30393	-0.284116	0.508831	Plant protein of unknown function (DUF868)
AT1G05210.1	AT1G05210	134	142	218	110	115	117	4.61891	-0.341038	0.50891	Transmembrane protein 97, predicted
AT1G23130.1	AT1G23130	2	20	1	2	3	2	5.85265	-1.55806	0.50891	Polyketide cyclase/dehydrase and lipid transport superfamily protein
AT5G03670.1	AT5G03670	271	189	308	265	282	325	4.85071	0.367523	0.50891	unknown protein
AT1G74910.1	AT1G74910	133	98	143	203	130	123	3.9285	0.466729	0.509083	ADP-glucose pyrophosphorylase family protein
AT1G77131.1	AT1G77131	8	5	9	1	2	4	0.106992	-1.42689	0.509083	pseudogene
AT2G28690.1	AT2G28690	17	8	18	22	37	16	1.13961	0.979333	0.509083	Protein of unknown function (DUF1635)
AT3G01710.2	AT3G01710	193	170	218	106	169	123	5.22065	-0.374288	0.509083	TPX2 (targeting protein for Xklp2) protein family
AT3G02710.1	AT3G02710	366	300	448	259	241	271	5.77458	-0.346804	0.509083	ARM repeat superfamily protein
AT3G58100.1	AT3G58100	30	33	55	25	29	13	2.79954	-0.62415	0.509083	plasmodesmata callose-binding protein 5
AT3G60840.1	AT3G60840	203	195	296	140	197	147	4.56133	-0.334427	0.509083	microtubule-associated protein 65-4
AT4G02540.1	AT4G02540	4	5	8	1	2	2	2.20267	-1.51903	0.509083	Cysteine/Histidine-rich C1 domain family protein
AT4G30825.1	AT4G30825	36	36	47	56	51	44	3.32494	0.52106	0.509083	Tetratricopeptide repeat (TPR)-like superfamily protein
AT5G08570.1	AT5G08570	179	219	239	142	180	133	5.0746	-0.315075	0.509083	Pyruvate kinase family protein
AT5G13590.1	AT5G13590	108	108	174	150	149	133	4.07935	0.336999	0.509083	unknown protein
AT5G49880.1	AT5G49880	75	65	106	50	57	54	3.43391	-0.424982	0.509083	mitotic checkpoint family protein
AT3G16340.1	AT3G16340	194	265	338	320	289	355	4.3701	0.460502	0.509442	pleiotropic drug resistance 1
AT4G18170.1	AT4G18170	1	1	2	6	3	4	0.28748	1.78157	0.509442	WRKY DNA-binding protein 28
AT4G23060.1	AT4G23060	27	48	54	27	21	20	2.90664	-0.739608	0.509442	IQ-domain 22
AT1G67870.1	AT1G67870	1821	2039	1770	1107	1392	1018	6.46702	-0.533395	0.509657	glycine-rich protein
AT4G11950.1	AT4G11950	35	40	45	22	28	15	1.30974	-0.710589	0.510143	Protein of unknown function (DUF1191)
AT4G16980.1	AT4G16980	548	471	406	663	502	654	7.09871	0.498121	0.510593	arabinogalactan-protein family
AT2G43410.4	AT2G43410	104	97	148	67	71	98	3.65483	-0.378197	0.510628	RNA binding
AT5G48600.2	AT5G48600	1224	1273	1774	981	1094	1067	7.32143	-0.258377	0.510628	structural maintenance of chromosome 3
AT4G37130.1	AT4G37130	14	33	44	17	19	12	1.9475	-0.728538	0.511125	hydroxyproline-rich glycoprotein family protein
AT2G41550.1	AT2G41550	119	99	154	90	71	88	3.50717	-0.392705	0.511387	Rho termination factor
AT3G27997.1	AT3G27997	52	41	67	65	59	70	3.01098	0.462033	0.511387	pseudogene
AT2G02570.2	AT2G02570	237	205	299	171	191	169	4.74757	-0.299162	0.511822	nucleic acid binding;RNA binding
AT3G13360.1	AT3G13360	1068	992	1172	1049	1183	1264	6.86816	0.281424	0.511822	WPP domain interacting protein 3
AT1G15550.1	AT1G15550	34	51	60	20	23	28	1.31131	-0.846834	0.513955	gibberellin 3-oxidase 1
AT1G48598.1	AT1G48598	487	623	623	275	433	422	5.53729	-0.456656	0.513955	conserved peptide upstream open reading frame 31
AT1G48600.2	AT1G48600	487	623	623	275	433	422	5.53729	-0.456656	0.513955	S-adenosyl-L-methionine-dependent methyltransferases superfamily protein
AT1G72250.2	AT1G72250	593	539	627	369	493	413	6.12393	-0.299113	0.513955	Di-glucose binding protein with Kinesin motor domain
AT4G14960.1	AT4G14960	3641	3887	4693	3033	3643	2833	9.93741	-0.190128	0.513955	Tubulin/FtsZ family protein
AT5G67340.1	AT5G67340	2	1	0	9	5	0	-0.219173	2.23493	0.513955	ARM repeat superfamily protein
AT5G04950.1	AT5G04950	0	1	6	0	0	0	2.34473	-4.20221	0.513996	nicotianamine synthase 1
AT4G11530.1	AT4G11530	2	1	4	10	4	4	-0.887579	1.50359	0.514001	cysteine-rich RLK (RECEPTOR-like protein kinase) 34
AT1G10090.1	AT1G10090	18	5	13	18	19	22	2.15761	0.884881	0.514008	Early-responsive to dehydration stress protein (ERD4)
AT1G17220.1	AT1G17220	470	362	592	488	479	548	6.33336	0.277735	0.514008	Translation initiation factor 2, small GTP-binding protein
AT1G76670.1	AT1G76670	133	143	174	95	125	99	4.27911	-0.32101	0.514008	Nucleotide-sugar transporter family protein
AT2G01320.2	AT2G01320	46	46	63	26	41	30	3.30421	-0.495647	0.514008	ABC-2 type transporter family protein
AT2G16630.1	AT2G16630	38	49	33	55	37	74	3.62793	0.619517	0.514008	Pollen Ole e 1 allergen and extensin family protein
AT2G25570.1	AT2G25570	132	106	140	72	101	91	3.70137	-0.343515	0.514008	binding
AT3G01280.1	AT3G01280	1514	1683	2112	1169	1529	1321	7.84148	-0.225502	0.514008	voltage dependent anion channel 1
AT3G11090.1	AT3G11090	342	351	438	258	283	219	4.6621	-0.398809	0.514008	LOB domain-containing protein 21
AT4G19191.1	AT4G19191	11	4	9	0	4	3	0.168342	-1.55343	0.514008	Tetratricopeptide repeat (TPR)-like superfamily protein
AT4G28700.1	AT4G28700	1	1	1	7	6	0	0.464119	2.1489	0.514008	ammonium transporter 1;4
AT5G36710.1	AT5G36710	608	547	843	498	583	353	6.75901	-0.292236	0.514008	unknown protein
AT5G36800.1	AT5G36800	608	547	843	498	583	353	6.75901	-0.292236	0.514008	unknown protein
AT5G44060.1	AT5G44060	31	22	17	14	10	10	2.13861	-0.88496	0.514008	unknown protein
AT5G56100.1	AT5G56100	76	57	99	142	76	130	5.33843	0.781527	0.514008	glycine-rich protein / oleosin
AT5G57785.1	AT5G57785	169	257	398	400	299	377	3.67594	0.592405	0.514008	unknown protein
AT4G25080.2	AT4G25080	120	104	136	179	132	123	4.63697	0.446553	0.515731	magnesium-protoporphyrin IX methyltransferase
AT4G35350.1	AT4G35350	33	36	33	48	63	53	2.69055	0.838689	0.515738	xylem cysteine peptidase 1
AT1G11660.1	AT1G11660	139	129	193	159	159	180	4.53874	0.295476	0.515992	heat shock protein 70 (Hsp 70) family protein
AT2G27020.1	AT2G27020	661	661	813	512	554	528	6.87843	-0.247844	0.515992	20S proteasome alpha subunit G1
AT3G01810.2	AT3G01810	160	174	188	128	142	107	4.43388	-0.299468	0.515992	unknown protein
AT3G16230.1	AT3G16230	218	210	249	161	164	167	4.72208	-0.287838	0.515992	Predicted eukaryotic LigT
AT3G45000.1	AT3G45000	12	7	10	3	3	3	0.346095	-1.47959	0.515992	SNF7 family protein
AT3G46650.1	AT3G46650	7	6	9	2	2	2	0.471473	-1.63669	0.515992	UDP-Glycosyltransferase superfamily protein
AT4G08980.2	AT4G08980	463	445	691	601	541	534	6.0944	0.259089	0.515992	F-BOX WITH WD-40 2
AT4G29950.2	AT4G29950	299	253	337	410	299	358	4.73413	0.441477	0.515992	Ypt/Rab-GAP domain of gyp1p superfamily protein
AT4G37200.1	AT4G37200	246	263	338	325	334	273	5.77316	0.316442	0.515992	Thioredoxin superfamily protein
AT5G40170.1	AT5G40170	28	36	42	57	61	46	2.29925	0.802937	0.515992	receptor like protein 54
AT5G46110.3	AT5G46110	1336	1289	1879	1658	1414	1714	8.00708	0.276322	0.515992	Glucose-6-phosphate/phosphate translocator-related
AT5G47870.1	AT5G47870	229	257	317	220	189	144	5.40968	-0.360059	0.515992	unknown protein
AT5G51980.1	AT5G51980	64	74	92	48	40	55	3.54813	-0.504494	0.515992	Transducin/WD40 repeat-like superfamily protein
AT5G52370.1	AT5G52370	434	390	508	363	321	310	6.107	-0.245562	0.515992	unknown protein
AT5G48360.1	AT5G48360	157	156	233	117	117	137	5.16209	-0.369372	0.516117	Actin-binding FH2 (formin homology 2) family protein
AT4G22285.1	AT4G22285	734	579	791	469	451	603	5.97128	-0.289619	0.516134	Ubiquitin C-terminal hydrolases superfamily protein
AT5G17620.1	AT5G17620	16	20	24	12	14	5	2.0628	-0.768068	0.516134	unknown protein
AT1G80520.1	AT1G80520	11	14	18	21	28	31	0.800768	1.07008	0.51648	Sterile alpha motif (SAM) domain-containing protein
AT1G29250.1	AT1G29250	510	438	584	341	419	357	6.53074	-0.281253	0.517906	Alba DNA/RNA-binding protein
AT3G47070.1	AT3G47070	373	353	534	489	453	449	6.93917	0.331774	0.518069	unknown protein
AT1G27440.1	AT1G27440	43	15	24	40	40	38	1.83104	0.688112	0.518523	Exostosin family protein
AT1G01220.1	AT1G01220	59	59	98	110	80	67	3.42342	0.443009	0.518627	L-fucokinase/GDP-L-fucose pyrophosphorylase
AT3G47650.1	AT3G47650	1087	998	1393	1397	1267	1190	7.88149	0.330447	0.518627	DnaJ/Hsp40 cysteine-rich domain superfamily protein
AT5G14580.1	AT5G14580	106	69	130	43	79	70	4.15559	-0.47928	0.518627	polyribonucleotide nucleotidyltransferase, putative
AT5G35670.1	AT5G35670	232	253	312	262	350	292	4.77666	0.355961	0.518627	IQ-domain 33
AT3G25810.1	AT3G25810	3	4	0	0	0	0	3.19549	-4.27941	0.519231	Terpenoid cyclases/Protein prenyltransferases superfamily protein
AT2G17580.1	AT2G17580	4	8	8	15	14	7	2.27857	1.01095	0.520057	Polynucleotide adenylyltransferase family protein
AT1G23310.2	AT1G23310	1350	1030	1480	1532	1304	1528	8.12944	0.35697	0.521153	glutamate:glyoxylate aminotransferase
AT5G05670.2	AT5G05670	302	311	408	245	263	250	5.27562	-0.250349	0.521176	signal recognition particle binding
AT3G15340.1	AT3G15340	74	54	93	82	98	95	4.34575	0.501451	0.521407	proton pump interactor 2
AT2G40940.1	AT2G40940	65	42	76	89	64	68	3.5473	0.458546	0.521703	ethylene response sensor 1
AT1G01090.1	AT1G01090	496	471	642	568	574	510	6.51681	0.218074	0.521775	pyruvate dehydrogenase E1 alpha
AT1G78940.1	AT1G78940	7	6	16	3	6	1	0.371339	-1.30691	0.521775	Protein kinase protein with adenine nucleotide alpha hydrolases-like domain
AT4G01130.1	AT4G01130	3	2	6	13	6	6	1.06656	1.34808	0.521775	GDSL-like Lipase/Acylhydrolase superfamily protein
AT2G06200.1	AT2G06200	17	8	20	5	6	9	2.98294	-0.968032	0.521883	growth-regulating factor 6
AT3G22840.1	AT3G22840	9	29	18	8	9	5	4.08658	-1.18828	0.522185	Chlorophyll A-B binding family protein
AT4G26840.1	AT4G26840	1538	1420	1851	1286	1379	1016	7.79364	-0.210654	0.522185	small ubiquitin-like modifier 1
AT4G27760.1	AT4G27760	95	73	124	124	105	104	4.13601	0.376768	0.522185	NAD(P)-binding Rossmann-fold superfamily protein
AT5G48330.2	AT5G48330	63	58	63	41	31	37	3.12107	-0.585916	0.522185	Regulator of chromosome condensation (RCC1) family protein
AT3G04400.2	AT3G04400	15080	15283	21282	12836	14224	12664	11.5241	-0.194971	0.522246	Ribosomal protein L14p/L23e family protein
AT3G57600.1	AT3G57600	8	7	11	2	4	1	1.58729	-1.66151	0.522246	Integrase-type DNA-binding superfamily protein
AT4G39795.1	AT4G39795	11	4	5	3	2	1	0.387388	-1.51943	0.522804	Protein of unknown function (DUF581)
AT3G53350.2	AT3G53350	53	74	85	51	42	39	3.24937	-0.504106	0.522919	ROP interactive partner 4
AT4G09890.1	AT4G09890	344	445	596	277	389	287	4.80917	-0.354911	0.523311	Protein of unknown function (DUF3511)
AT4G38250.1	AT4G38250	811	727	939	870	854	836	6.64548	0.222656	0.523311	Transmembrane amino acid transporter family protein
AT1G08730.1	AT1G08730	2	3	2	2	12	6	0.405312	1.62468	0.523345	Myosin family protein with Dil domain
AT1G15430.2	AT1G15430	11	12	19	29	26	15	1.62876	0.91948	0.523345	Protein of unknown function (DUF1644)
AT1G35580.3	AT1G35580	21	31	37	32	31	61	2.77909	0.658346	0.523345	cytosolic invertase 1
AT2G04700.1	AT2G04700	459	416	619	522	481	550	6.32867	0.242158	0.523345	ferredoxin thioredoxin reductase catalytic beta chain family protein
AT2G17140.1	AT2G17140	37	35	51	23	17	30	2.37725	-0.626206	0.523345	Pentatricopeptide repeat (PPR) superfamily protein
AT2G22090.2	AT2G22090	32	33	39	59	41	32	2.43492	0.519099	0.523345	RNA-binding (RRM/RBD/RNP motifs) family protein
AT2G36835.1	AT2G36835	125	117	159	161	133	152	4.6036	0.333961	0.523345	unknown protein
AT3G20150.1	AT3G20150	636	536	710	467	486	459	6.57231	-0.2396	0.523345	Kinesin motor family protein
AT3G44050.1	AT3G44050	433	440	558	337	339	356	6.03558	-0.294348	0.523345	P-loop containing nucleoside triphosphate hydrolases superfamily protein
AT3G62040.1	AT3G62040	44	36	112	75	121	80	2.05931	0.756935	0.523345	Haloacid dehalogenase-like hydrolase (HAD) superfamily protein
AT4G05500.1	AT4G05500	14	17	26	6	9	14	-0.336595	-0.784194	0.523345	pseudogene
AT4G10620.1	AT4G10620	33	20	34	18	10	17	2.1779	-0.763214	0.523345	P-loop containing nucleoside triphosphate hydrolases superfamily protein
AT4G20030.1	AT4G20030	27	9	23	12	9	8	1.76814	-0.834168	0.523345	RNA-binding (RRM/RBD/RNP motifs) family protein
AT4G34650.1	AT4G34650	7	10	7	2	2	4	0.551213	-1.37926	0.523345	squalene synthase 2
AT3G48830.1	AT3G48830	2	1	7	0	1	0	-0.417295	-2.72983	0.523586	polynucleotide adenylyltransferase family protein / RNA recognition motif (RRM)-containing protein
AT1G22065.1	AT1G22065	2	3	13	16	11	8	1.80834	1.16423	0.523744	unknown protein
AT1G31860.1	AT1G31860	54	65	82	28	56	46	4.5972	-0.449737	0.525024	histidine biosynthesis bifunctional protein (HISIE)
AT4G29900.1	AT4G29900	109	130	149	184	153	140	4.27992	0.472322	0.526515	autoinhibited Ca(2+)-ATPase 10
AT2G22690.2	AT2G22690	12	10	11	13	21	20	0.995135	0.872774	0.526815	zinc ion binding
AT4G36090.1	AT4G36090	25	10	42	37	35	33	1.99992	0.656061	0.526815	oxidoreductase, 2OG-Fe(II) oxygenase family protein
AT5G18600.1	AT5G18600	375	126	285	685	192	328	4.31466	0.807413	0.52715	Thioredoxin superfamily protein
AT5G36700.3	AT5G36700	765	731	1143	1086	902	922	6.87449	0.334998	0.52715	2-phosphoglycolate phosphatase 1
AT4G25120.1	AT4G25120	21	22	30	7	13	18	1.81457	-0.756008	0.527449	P-loop containing nucleoside triphosphate hydrolases superfamily protein
AT5G54960.1	AT5G54960	83	88	135	59	65	54	3.33599	-0.589588	0.527969	pyruvate decarboxylase-2
AT1G52700.1	AT1G52700	18	11	21	24	37	17	0.829183	0.818862	0.52837	alpha/beta-Hydrolases superfamily protein
AT1G31140.1	AT1G31140	0	2	5	0	0	0	-0.920718	-4.19957	0.528919	GORDITA
AT1G34640.1	AT1G34640	55	72	86	52	48	32	3.62114	-0.510723	0.528919	peptidases
AT2G13690.1	AT2G13690	243	269	307	192	236	169	5.15848	-0.28537	0.528919	PRLI-interacting factor, putative
AT2G25690.2	AT2G25690	38	42	50	23	24	22	2.67877	-0.736136	0.528919	Protein of unknown function (DUF581)
AT3G25010.1	AT3G25010	19	8	25	22	28	24	3.09395	0.69725	0.528919	receptor like protein 41
AT1G79200.1	AT1G79200	353	349	429	242	287	309	5.45293	-0.258621	0.530373	unknown protein
AT5G58700.1	AT5G58700	69	96	88	39	62	61	3.36782	-0.479736	0.530373	phosphatidylinositol-speciwc phospholipase C4
AT1G47610.1	AT1G47610	180	343	339	133	217	159	3.23693	-0.593782	0.530426	Transducin/WD40 repeat-like superfamily protein
AT4G19690.2	AT4G19690	3	1	2	0	0	0	0.446448	-4.00761	0.530426	iron-regulated transporter 1
AT5G49720.1	AT5G49720	681	776	962	894	850	782	6.60853	0.240726	0.530426	glycosyl hydrolase 9A1
AT5G51600.1	AT5G51600	144	159	246	111	118	117	4.82187	-0.471658	0.530426	Microtubule associated protein (MAP65/ASE1) family protein
AT5G48880.3	AT5G48880	129	236	205	115	140	121	6.02247	-0.440124	0.531068	peroxisomal 3-keto-acyl-CoA thiolase 2
AT1G12460.1	AT1G12460	28	32	44	43	53	35	3.58617	0.511968	0.531328	Leucine-rich repeat protein kinase family protein
AT2G38970.1	AT2G38970	222	177	247	149	156	146	4.34282	-0.341093	0.532129	Zinc finger (C3HC4-type RING finger) family protein
AT3G02320.1	AT3G02320	100	100	119	72	76	67	3.83947	-0.39524	0.532699	N2,N2-dimethylguanosine tRNA methyltransferase
AT1G26945.1	AT1G26945	82	90	86	48	60	59	4.13999	-0.464535	0.533606	basic helix-loop-helix (bHLH) DNA-binding superfamily protein
AT1G49410.1	AT1G49410	540	623	809	412	548	500	7.02144	-0.253625	0.533606	translocase of the outer mitochondrial membrane 6
AT2G39705.1	AT2G39705	95	117	192	73	103	73	3.70777	-0.499648	0.533606	ROTUNDIFOLIA like 8
AT2G28315.1	AT2G28315	16	11	9	31	25	18	0.586827	1.17942	0.533916	Nucleotide/sugar transporter family protein
AT4G24570.1	AT4G24570	112	71	132	49	36	26	3.93712	-1.30756	0.533916	dicarboxylate carrier 2
AT5G25580.1	AT5G25580	226	225	321	134	204	205	4.96668	-0.324803	0.533916	unknown protein
AT5G44710.1	AT5G44710	61	73	89	41	51	50	3.23174	-0.472591	0.534748	unknown protein
AT5G42710.1	AT5G42710	29	36	36	42	44	55	1.68099	0.648296	0.535153	unknown protein
AT1G10540.1	AT1G10540	18	13	7	12	3	1	1.78076	-1.08355	0.535391	nucleobase-ascorbate transporter 8
AT3G17680.2	AT3G17680	103	83	148	66	71	79	4.05111	-0.435584	0.535391	Kinase interacting (KIP1-like) family protein
AT4G10910.1	AT4G10910	5	5	8	23	6	18	0.662815	1.56259	0.535391	unknown protein
AT4G20110.2	AT4G20110	0	0	0	0	3	4	-1.14816	4.3817	0.535391	VACUOLAR SORTING RECEPTOR 7
AT3G61520.1	AT3G61520	338	302	451	213	269	278	5.4327	-0.336931	0.536497	Pentatricopeptide repeat (PPR) superfamily protein
AT5G20450.2	AT5G20450	33	23	32	38	39	36	2.87615	0.53498	0.536954	unknown protein
AT2G22610.2	AT2G22610	489	462	627	348	382	366	6.22386	-0.346252	0.537103	Di-glucose binding protein with Kinesin motor domain
AT1G54520.1	AT1G54520	106	98	150	137	126	137	4.4268	0.362584	0.537606	unknown protein
AT5G67070.1	AT5G67070	1375	1466	2034	1130	1261	1243	7.86336	-0.238945	0.537606	ralf-like 34
ATCG00670.1	ATCG00670	651	489	661	752	655	717	6.59322	0.412096	0.537606	plastid-encoded CLP P
AT1G78850.1	AT1G78850	6	2	8	27	7	8	2.94921	1.58669	0.537652	D-mannose binding lectin protein with Apple-like carbohydrate-binding domain
AT5G04600.1	AT5G04600	1730	1623	2061	1396	1289	1406	7.87291	-0.228678	0.537652	RNA-binding (RRM/RBD/RNP motifs) family protein
AT1G21880.2	AT1G21880	237	327	357	197	244	206	5.34936	-0.337947	0.538073	lysm domain GPI-anchored protein 1 precursor
AT1G16858.1	AT1G16858	882	843	1053	685	790	663	6.84511	-0.204826	0.538559	conserved peptide upstream open reading frame 55
AT1G16860.1	AT1G16860	882	843	1053	685	790	663	6.84511	-0.204826	0.538559	Ubiquitin-specific protease family C19-related protein
AT1G62085.1	AT1G62085	8	1	6	3	0	1	0.196541	-1.64115	0.538559	Mitochondrial transcription termination factor family protein
AT1G68190.1	AT1G68190	50	37	57	39	16	19	2.49558	-0.770951	0.538559	B-box zinc finger family protein
AT4G21750.2	AT4G21750	162	149	182	130	119	101	6.60404	-0.320311	0.538559	Homeobox-leucine zipper family protein / lipid-binding START domain-containing protein
AT5G25475.3	AT5G25475	71	65	110	61	55	43	3.32162	-0.438646	0.538559	AP2/B3-like transcriptional factor family protein
AT1G09490.2	AT1G09490	98	105	123	74	88	62	3.96353	-0.367403	0.538627	NAD(P)-binding Rossmann-fold superfamily protein
AT5G40490.1	AT5G40490	247	193	215	150	148	155	4.80837	-0.369464	0.538635	RNA-binding (RRM/RBD/RNP motifs) family protein
AT2G20490.1	AT2G20490	272	247	355	201	215	213	5.44144	-0.292019	0.538774	nucleolar RNA-binding Nop10p family protein
AT2G41750.1	AT2G41750	250	252	280	252	330	294	5.02008	0.329572	0.538774	DTW domain-containing protein
AT3G17210.1	AT3G17210	2912	2329	3636	3200	2894	2950	9.05048	0.214427	0.538774	heat stable protein 1
AT5G44720.1	AT5G44720	815	990	1150	512	930	680	6.02805	-0.308633	0.538774	Molybdenum cofactor sulfurase family protein
AT4G01550.1	AT4G01550	26	32	23	46	29	37	2.08603	0.625462	0.539285	NAC domain containing protein 69
ATMG01130.1	ATMG01130	17	6	9	16	21	26	1.826	1.12866	0.539691	unknown protein
AT3G21530.1	AT3G21530	2	1	0	4	6	3	0.157831	2.13063	0.539867	DNAse I-like superfamily protein
AT4G05010.1	AT4G05010	16	19	23	21	30	30	2.64076	0.655605	0.539867	F-box family protein
AT4G08300.1	AT4G08300	2	55	22	7	13	9	1.21524	-1.32053	0.539867	nodulin MtN21 /EamA-like transporter family protein
AT5G05410.1	AT5G05410	795	225	157	192	167	124	3.79172	-1.177	0.539867	DRE-binding protein 2A
AT5G02090.1	AT5G02090	9	5	14	16	20	14	0.260199	1.02457	0.540037	unknown protein
AT5G62165.1	AT5G62165	131	134	170	162	175	197	3.24223	0.472659	0.540037	AGAMOUS-like 42
AT3G58000.1	AT3G58000	6	1	5	2	0	0	0.249302	-2.21084	0.540681	VQ motif-containing protein
AT4G27960.2	AT4G27960	75	94	105	50	83	45	3.40979	-0.451126	0.540681	ubiquitin conjugating enzyme 9
AT1G09610.1	AT1G09610	7	7	7	25	10	6	0.578659	1.12478	0.54072	Protein of unknown function (DUF579)
AT2G46160.1	AT2G46160	3	10	12	2	1	5	1.36228	-1.41845	0.54072	RING/U-box superfamily protein
AT3G50880.1	AT3G50880	193	163	250	144	154	121	4.50232	-0.347862	0.54072	DNA glycosylase superfamily protein
AT4G25550.1	AT4G25550	114	126	174	165	172	126	4.83941	0.344295	0.54072	Cleavage/polyadenylation specificity factor, 25kDa subunit
AT5G53740.1	AT5G53740	9	9	13	18	16	14	2.82046	0.803588	0.54072	unknown protein
AT5G55400.1	AT5G55400	29	37	32	15	18	24	2.33947	-0.611153	0.54072	Actin binding Calponin homology (CH) domain-containing protein
AT5G62680.1	AT5G62680	330	409	366	233	338	205	4.81912	-0.35814	0.54072	Major facilitator superfamily protein
AT1G12110.1	AT1G12110	9	17	19	7	7	4	3.12117	-1.12694	0.541022	nitrate transporter 1.1
AT5G36790.1	AT5G36790	772	739	1159	1098	915	923	6.89516	0.331249	0.541238	Haloacid dehalogenase-like hydrolase (HAD) superfamily protein
AT1G75680.1	AT1G75680	250	250	320	156	230	192	5.63111	-0.329651	0.541677	glycosyl hydrolase 9B7
AT1G78550.1	AT1G78550	9	19	23	29	25	21	1.55118	0.736438	0.541677	2-oxoglutarate (2OG) and Fe(II)-dependent oxygenase superfamily protein
AT2G04120.1	AT2G04120	0	0	0	2	3	1	-1.22883	4.17316	0.541677	pseudogene
AT5G12210.1	AT5G12210	181	142	179	201	184	174	4.51623	0.326736	0.541677	RAB geranylgeranyl transferase beta subunit 1
AT3G47500.1	AT3G47500	34	33	65	54	50	73	3.14095	0.626218	0.541801	cycling DOF factor 3
AT1G02870.1	AT1G02870	112	96	131	87	78	66	3.555	-0.374704	0.542259	unknown protein
AT2G32280.1	AT2G32280	39	41	48	24	26	24	3.08239	-0.614411	0.542259	Protein of unknown function (DUF1218)
AT2G39920.1	AT2G39920	25	15	6	6	9	3	1.66497	-1.22178	0.542259	HAD superfamily, subfamily IIIB acid phosphatase
AT3G02820.1	AT3G02820	31	27	37	13	16	24	1.94583	-0.659802	0.542259	zinc knuckle (CCHC-type) family protein
AT4G17410.1	AT4G17410	132	121	148	153	142	153	4.19344	0.333807	0.542259	DWNN domain, a CCHC-type zinc finger
AT4G24110.1	AT4G24110	41	31	102	20	19	45	6.46945	-0.805689	0.542259	unknown protein
AT4G24750.1	AT4G24750	793	605	968	856	803	810	7.18037	0.248357	0.542259	Rhodanese/Cell cycle control phosphatase superfamily protein
AT5G37740.2	AT5G37740	15	21	17	10	4	10	1.59057	-0.96825	0.542259	Calcium-dependent lipid-binding (CaLB domain) family protein
AT1G02150.1	AT1G02150	208	148	243	135	149	136	5.17472	-0.328048	0.542414	Tetratricopeptide repeat (TPR)-like superfamily protein
AT1G03050.1	AT1G03050	6	6	8	12	22	7	1.69853	1.19353	0.542414	ENTH/ANTH/VHS superfamily protein
AT1G34315.1	AT1G34315	6	5	6	12	4	15	2.24718	1.02864	0.542414	unknown protein
AT1G50732.1	AT1G50732	18	9	19	32	22	15	2.83146	0.765866	0.542414	unknown protein
AT3G01170.1	AT3G01170	12	21	29	38	16	34	1.93572	0.694366	0.542414	Ribosomal protein L34e superfamily protein
AT3G06980.1	AT3G06980	270	218	313	276	247	347	6.01317	0.300311	0.542414	DEA(D/H)-box RNA helicase family protein
AT4G10560.1	AT4G10560	12	12	14	1	4	6	-0.472759	-1.58863	0.542414	Cysteine/Histidine-rich C1 domain family protein
AT5G64230.1	AT5G64230	32	22	49	36	50	57	2.62054	0.670667	0.542414	unknown protein
AT1G07840.2	AT1G07840	198	158	268	212	207	237	4.88903	0.260506	0.543571	Sas10/Utp3/C1D family
AT2G39220.1	AT2G39220	158	182	268	107	136	127	4.24971	-0.525538	0.543571	PATATIN-like protein 6
AT5G43170.1	AT5G43170	5	5	4	0	2	1	-1.04813	-1.93908	0.543571	zinc-finger protein 3
AT5G49710.1	AT5G49710	34	43	52	20	21	29	2.2205	-0.699871	0.543571	unknown protein
AT1G63230.1	AT1G63230	10	7	10	5	3	1	0.558647	-1.37344	0.544135	Tetratricopeptide repeat (TPR)-like superfamily protein
AT2G22122.1	AT2G22122	54	34	70	33	28	28	2.04438	-0.631205	0.544135	unknown protein
AT1G20690.1	AT1G20690	33	28	50	51	52	40	3.14448	0.553594	0.544235	SWI-SNF-related chromatin binding protein
AT2G38610.2	AT2G38610	490	560	648	509	637	728	6.37452	0.314058	0.544235	RNA-binding KH domain-containing protein
AT1G06340.1	AT1G06340	0	2	1	3	4	5	-0.692739	2.0359	0.545144	Plant Tudor-like protein
AT1G10050.1	AT1G10050	19	26	19	16	12	3	2.15191	-0.882214	0.545144	glycosyl hydrolase family 10 protein / carbohydrate-binding domain-containing protein
AT1G51200.1	AT1G51200	2943	2760	3844	2469	2691	2083	8.32036	-0.217633	0.545144	A20/AN1-like zinc finger family protein
AT1G54440.2	AT1G54440	98	113	175	84	90	81	3.86068	-0.405476	0.545144	Polynucleotidyl transferase, ribonuclease H fold protein with HRDC domain
AT1G59730.1	AT1G59730	118	132	229	255	334	260	2.61243	1.02931	0.545144	thioredoxin H-type 7
AT2G18040.1	AT2G18040	387	424	465	310	379	252	6.00542	-0.272993	0.545144	peptidylprolyl cis/trans isomerase, NIMA-interacting 1
AT2G26070.1	AT2G26070	87	78	106	54	68	55	3.67462	-0.436416	0.545144	Protein of unknown function (DUF778)
AT2G38000.1	AT2G38000	60	52	84	42	40	41	3.27173	-0.484196	0.545144	chaperone protein dnaJ-related
AT3G18760.1	AT3G18760	130	146	196	104	129	98	4.31664	-0.330495	0.545144	Translation elongation factor EF1B/ribosomal protein S6 family protein
AT3G62410.1	AT3G62410	243	225	292	335	288	271	5.60562	0.411279	0.545144	CP12 domain-containing protein 2
AT4G07960.1	AT4G07960	55	58	81	33	42	48	4.11609	-0.473956	0.545144	Cellulose-synthase-like C12
AT4G25140.1	AT4G25140	0	0	0	14	1	0	-1.09529	5.46483	0.545144	oleosin 1
AT4G26650.1	AT4G26650	314	314	469	373	378	419	5.47257	0.281546	0.545144	RNA-binding (RRM/RBD/RNP motifs) family protein
AT4G32320.1	AT4G32320	26	27	43	39	45	34	2.68446	0.479054	0.545144	ascorbate peroxidase 6
AT5G55450.1	AT5G55450	191	90	199	250	240	198	4.89838	0.712747	0.545144	Bifunctional inhibitor/lipid-transfer protein/seed storage 2S albumin superfamily protein
AT2G37600.1	AT2G37600	979	876	1438	850	783	731	7.54528	-0.283301	0.545275	Ribosomal protein L36e family protein
AT3G02920.2	AT3G02920	7	3	5	0	3	0	0.0286901	-2.03197	0.545275	Replication protein A, subunit RPA32
AT1G32930.1	AT1G32930	119	94	124	87	76	66	3.95402	-0.382079	0.545865	Galactosyltransferase family protein
ATCG00170.1	ATCG00170	3450	2669	3194	4153	3593	4458	9.07848	0.555494	0.545865	DNA-directed RNA polymerase family protein
AT2G07786.1	AT2G07786	65	71	77	82	99	102	2.91499	0.576639	0.54594	pseudogene
AT3G61830.1	AT3G61830	236	212	253	159	193	137	4.77615	-0.351373	0.546003	auxin response factor 18
AT2G01460.1	AT2G01460	11	14	11	24	17	15	0.864163	0.799938	0.546328	P-loop containing nucleoside triphosphate hydrolases superfamily protein
AT2G44140.1	AT2G44140	1131	991	1715	1596	1411	1435	6.11907	0.411248	0.546328	Peptidase family C54 protein
AT3G60750.2	AT3G60750	475	483	630	644	550	530	6.89625	0.298697	0.546328	Transketolase
AT4G15530.5	AT4G15530	1	6	4	3	10	11	1.60741	1.26628	0.546328	pyruvate orthophosphate dikinase
AT5G40480.1	AT5G40480	197	207	266	139	174	168	4.90193	-0.300185	0.546328	embryo defective 3012
AT1G05560.1	AT1G05560	357	264	410	492	354	395	5.93423	0.453401	0.547148	UDP-glucosyltransferase 75B1
AT3G47080.1	AT3G47080	41	36	58	37	29	13	3.43304	-0.584136	0.547148	Tetratricopeptide repeat (TPR)-like superfamily protein
AT4G00530.1	AT4G00530	44	38	55	36	25	23	2.73763	-0.522452	0.547148	unknown protein
AT4G39070.1	AT4G39070	28	7	21	59	17	28	1.24238	1.08162	0.547148	B-box zinc finger family protein
AT4G25740.1	AT4G25740	910	832	1145	778	795	662	7.13669	-0.189642	0.548041	RNA binding Plectin/S10 domain-containing protein
AT2G20515.1	AT2G20515	19	24	19	11	12	10	3.01297	-0.737228	0.54811	unknown protein
AT2G31450.1	AT2G31450	8	16	15	23	21	13	1.56123	0.717773	0.54811	DNA glycosylase superfamily protein
AT3G59830.1	AT3G59830	1	0	1	4	6	2	-0.828492	2.54936	0.54811	Integrin-linked protein kinase family
AT4G34135.1	AT4G34135	0	0	0	1	4	1	0.904249	4.17115	0.54811	UDP-glucosyltransferase 73B2
AT5G63960.1	AT5G63960	105	91	129	77	63	79	3.72674	-0.387614	0.54811	DNA binding;nucleotide binding;nucleic acid binding;DNA-directed DNA polymerases;DNA-directed DNA polymerases
AT3G56030.1	AT3G56030	88	76	79	48	54	51	2.87478	-0.504982	0.548145	Tetratricopeptide repeat (TPR)-like superfamily protein
AT3G61670.1	AT3G61670	289	351	385	206	293	244	5.1062	-0.295606	0.548145	Protein of unknown function (DUF3133)
AT5G51880.1	AT5G51880	88	81	97	59	67	52	3.61616	-0.406731	0.548145	2-oxoglutarate (2OG) and Fe(II)-dependent oxygenase superfamily protein
AT4G00752.1	AT4G00752	34	28	43	55	35	40	3.02994	0.489408	0.548826	UBX domain-containing protein
AT3G18990.1	AT3G18990	133	139	164	126	111	69	4.11124	-0.336489	0.549194	AP2/B3-like transcriptional factor family protein
AT3G28570.1	AT3G28570	2	2	2	0	0	0	0.880974	-4.01075	0.549441	P-loop containing nucleoside triphosphate hydrolases superfamily protein
AT4G36750.1	AT4G36750	57	64	78	104	61	69	4.18108	0.413048	0.549587	Quinone reductase family protein
AT1G27435.1	AT1G27435	234	259	291	193	219	164	5.24274	-0.274189	0.549961	unknown protein
AT4G34580.1	AT4G34580	63	38	69	84	56	86	2.21855	0.599171	0.549961	Sec14p-like phosphatidylinositol transfer family protein
AT1G02120.1	AT1G02120	390	364	574	291	324	335	5.50189	-0.292602	0.550814	GRAM domain family protein
AT1G13930.2	AT1G13930	5741	5882	6966	3516	4224	4371	10.1047	-0.448222	0.550814	unknown protein
AT1G77770.2	AT1G77770	70	94	117	96	120	109	3.78458	0.389582	0.550814	Protein of unknown function (DUF1644)
AT5G17870.1	AT5G17870	63	63	82	58	89	90	10.4162	0.365121	0.550814	plastid-specific 50S ribosomal protein 6
AT5G18390.1	AT5G18390	64	48	69	32	43	37	2.92919	-0.514602	0.550814	Pentatricopeptide repeat (PPR) superfamily protein
AT5G46640.1	AT5G46640	9	10	6	2	2	4	1.0093	-1.45063	0.550814	AT hook motif DNA-binding family protein
AT1G61600.1	AT1G61600	187	209	258	115	187	121	3.84132	-0.455463	0.551453	Protein of unknown function (DUF1262)
AT3G46510.1	AT3G46510	202	177	282	250	219	235	4.74036	0.27945	0.551479	plant U-box 13
AT3G59940.1	AT3G59940	1043	746	1330	1572	1035	1296	7.00669	0.521584	0.551695	Galactose oxidase/kelch repeat superfamily protein
AT5G01015.2	AT5G01015	139	89	101	132	124	135	4.74379	0.409925	0.551695	unknown protein
AT2G01170.1	AT2G01170	20	20	13	10	5	11	1.68298	-0.861221	0.552005	bidirectional amino acid transporter 1
AT1G73390.1	AT1G73390	56	78	77	89	82	84	3.77692	0.442776	0.552387	Endosomal targeting BRO1-like domain-containing protein
AT4G19700.1	AT4G19700	337	336	491	276	283	227	5.70793	-0.37947	0.552387	SBP (S-ribonuclease binding protein) family protein
AT4G33666.1	AT4G33666	27	21	54	67	33	42	4.07479	0.693937	0.552387	unknown protein
AT1G20540.1	AT1G20540	85	69	120	52	72	53	3.65817	-0.441352	0.552391	Transducin/WD40 repeat-like superfamily protein
AT5G49220.1	AT5G49220	128	110	193	92	84	108	4.06223	-0.405938	0.553179	Protein of unknown function (DUF789)
AT1G77030.1	AT1G77030	412	343	489	274	342	287	5.70816	-0.283761	0.553328	hydrolases, acting on acid anhydrides, in phosphorus-containing anhydrides;ATP-dependent helicases;nucleic acid binding;ATP binding;RNA binding;helicases
AT3G49810.1	AT3G49810	358	419	564	319	311	335	5.65077	-0.289155	0.553328	ARM repeat superfamily protein
AT2G43550.1	AT2G43550	1017	996	1389	584	911	620	5.41716	-0.506684	0.553761	Scorpion toxin-like knottin superfamily protein
AT5G50930.1	AT5G50930	30	13	25	6	15	12	1.12011	-0.860343	0.553761	Histone superfamily protein
ATMG00280.1	ATMG00280	90	71	63	105	112	79	3.70143	0.550051	0.553761	Ribulose bisphosphate carboxylase large chain, catalytic domain
AT1G73080.1	AT1G73080	36	63	66	30	36	35	3.7658	-0.531237	0.553792	PEP1 receptor 1
AT1G79160.1	AT1G79160	44	59	54	35	20	37	3.65023	-0.602429	0.553792	unknown protein
AT5G37930.1	AT5G37930	31	26	30	13	16	15	1.84184	-0.810835	0.554683	Protein with RING/U-box and TRAF-like domains
AT2G40200.1	AT2G40200	4	8	9	11	19	14	0.132848	1.22915	0.5547	basic helix-loop-helix (bHLH) DNA-binding superfamily protein
AT3G30120.1	AT3G30120	1	0	0	2	4	3	-0.897095	2.91186	0.555011	pseudogene
AT3G46950.1	AT3G46950	82	72	112	40	71	60	3.4009	-0.45321	0.555011	Mitochondrial transcription termination factor family protein
AT5G02770.1	AT5G02770	747	676	985	630	605	603	6.48548	-0.20529	0.555011	unknown protein
AT5G52780.1	AT5G52780	81	101	155	153	124	114	4.42423	0.409112	0.555011	Protein of unknown function (DUF3464)
AT3G13857.1	AT3G13857	19	22	19	28	27	30	2.14748	0.66641	0.555064	unknown protein
AT3G06640.1	AT3G06640	3	1	4	8	3	14	-0.222458	1.80194	0.555367	PAS domain-containing protein tyrosine kinase family protein
AT5G61290.1	AT5G61290	13	6	12	13	24	12	1.67539	0.830016	0.555433	Flavin-binding monooxygenase family protein
AT4G14030.1	AT4G14030	248	260	405	380	279	307	6.33014	0.275481	0.555562	selenium-binding protein 1
AT5G56750.1	AT5G56750	58	60	90	85	83	94	3.49285	0.520955	0.555606	N-MYC downregulated-like 1
AT1G20980.1	AT1G20980	1588	1495	2023	1923	1752	1610	7.9592	0.230129	0.556344	squamosa promoter binding protein-like 14
AT4G35410.1	AT4G35410	57	36	61	61	64	58	3.13096	0.428778	0.55727	Clathrin adaptor complex small chain family protein
AT5G08550.1	AT5G08550	74	71	82	45	47	60	3.16327	-0.404428	0.557418	GC-rich sequence DNA-binding factor-like protein
AT4G00380.1	AT4G00380	916	690	1017	671	560	659	6.20331	-0.291247	0.557967	XH/XS domain-containing protein
AT2G46150.1	AT2G46150	0	2	4	0	0	0	2.11977	-3.98645	0.558122	Late embryogenesis abundant (LEA) hydroxyproline-rich glycoprotein family
AT5G14010.1	AT5G14010	7	5	3	0	3	1	-0.411135	-1.67154	0.558122	C2H2 and C2HC zinc fingers superfamily protein
AT1G30070.2	AT1G30070	63	83	80	44	55	44	3.85062	-0.494253	0.55815	SGS domain-containing protein
[truncated: 24,329 more rows]

## Sheet: Stage13-14
Supplementary Table 3. List of differentially expressed genes between the wild type and crc at stage 12 and stage 13-14.
reference_id	AGI	ler_14_1	ler_14_2	ler_14_3	ler_14_4	crc_14_1	crc_14_2	crc_14_3	crc_14_4	logconc	logfc	adj_pvalue	annotation
AT2G39060.1	AT2G39060	4412	4549	6557	5805	0	0	2	0	6.71053	-13.1562	0	Nodulin MtN3 family protein
AT1G69180.1	AT1G69180	2832	2881	4340	4164	4	0	0	0	6.12761	-11.7263	1.5579e-292	Plant-specific transcription factor YABBY family protein
AT3G25810.1	AT3G25810	1134	1169	1610	1870	0	0	0	0	4.84792	-13.5529	1.46046e-175	Terpenoid cyclases/Protein prenyltransferases superfamily protein
AT1G53480.1	AT1G53480	8	6	24	0	807	960	773	1028	5.73408	6.43182	2.61148e-116	mto 1 responding down 1
AT1G18720.1	AT1G18720	3724	3271	5096	4777	775	941	791	870	7.18118	-2.42881	1.05624e-86	Protein of unknown function (DUF962)
AT4G12530.1	AT4G12530	236	285	475	435	0	0	0	0	2.88338	-11.5268	1.72819e-59	Bifunctional inhibitor/lipid-transfer protein/seed storage 2S albumin superfamily protein
AT1G53490.1	AT1G53490	1	0	16	3	328	352	260	394	4.40798	5.93786	3.10669e-52	RING/U-box superfamily protein
AT2G36190.1	AT2G36190	4854	5251	8135	7372	10	29	15	11	6.97937	-8.73529	1.02022e-46	cell wall invertase 4
AT1G23010.1	AT1G23010	679	730	785	912	33	18	8	33	4.11576	-5.19975	2.85967e-42	Cupredoxin superfamily protein
AT4G00950.1	AT4G00950	699	591	788	748	194	197	226	203	5.54047	-1.8913	9.54803e-41	Protein of unknown function (DUF688)
AT1G23300.1	AT1G23300	144	115	180	153	0	0	0	0	1.70296	-10.2641	3.80546e-35	MATE efflux family protein
AT3G46160.1	AT3G46160	122	105	140	153	0	0	0	0	1.54417	-10.0834	1.88679e-32	Protein kinase superfamily protein
AT4G21100.1	AT4G21100	222	278	276	308	2	14	24	8	3.93877	-4.59224	5.17138e-31	damaged DNA binding protein 1B
AT1G74020.1	AT1G74020	812	736	927	1147	111	62	57	126	4.65761	-3.46089	6.0264e-31	strictosidine synthase 2
AT2G30650.1	AT2G30650	768	653	836	773	94	149	140	74	4.74279	-2.8381	1.41677e-27	ATP-dependent caseinolytic (Clp) protease/crotonase family protein
AT3G10040.1	AT3G10040	4545	2602	2125	2786	452	530	246	359	6.30391	-3.0854	1.13213e-26	sequence-specific DNA binding transcription factors
AT5G06720.1	AT5G06720	204	176	249	196	18	6	6	28	3.17537	-3.93593	4.29346e-24	peroxidase 2
AT5G47060.1	AT5G47060	731	621	702	532	223	223	170	219	4.8807	-1.75728	1.18713e-22	Protein of unknown function (DUF581)
AT1G51340.1	AT1G51340	470	413	572	547	97	136	71	168	4.34798	-2.21904	1.20564e-21	MATE efflux family protein
AT4G35480.1	AT4G35480	280	351	456	457	30	77	65	37	3.80396	-2.99611	2.16749e-21	RING-H2 finger A3B
AT5G20830.2	AT5G20830	5406	6021	7556	7322	2106	3110	2254	2999	7.826	-1.45551	2.24255e-21	sucrose synthase 1
AT4G24110.1	AT4G24110	1156	873	523	773	90	105	89	49	4.61864	-3.46147	6.76531e-21	unknown protein
AT4G22490.1	AT4G22490	372	321	452	367	114	164	116	88	6.14966	-1.76484	2.07652e-20	Bifunctional inhibitor/lipid-transfer protein/seed storage 2S albumin superfamily protein
AT4G33560.1	AT4G33560	407	379	246	448	30	46	15	33	3.66398	-3.74315	5.44816e-20	Wound-responsive family protein
AT1G43800.1	AT1G43800	988	906	436	943	2	11	13	0	4.22545	-7.08654	2.16651e-19	Plant stearoyl-acyl-carrier-protein desaturase family protein
AT2G36090.1	AT2G36090	219	167	209	239	11	44	17	37	3.4126	-3.08558	3.27894e-17	F-box family protein
AT5G54160.1	AT5G54160	1086	1261	1910	1669	411	414	273	337	6.24064	-2.15374	3.79081e-17	O-methyltransferase 1
AT1G02020.1	AT1G02020	201	151	175	207	34	68	70	59	4.41165	-1.78895	4.76168e-17	nitroreductase family protein
AT2G18530.1	AT2G18530	54	55	39	66	0	0	0	0	0.46054	-8.82813	6.31035e-16	Protein kinase superfamily protein
AT4G35080.1	AT4G35080	883	745	1095	1037	374	391	410	515	5.58226	-1.26197	1.1648e-15	high-affinity nickel-transport family protein
AT4G10270.1	AT4G10270	1081	752	461	891	180	209	118	188	4.6623	-2.35824	3.25161e-15	Wound-responsive family protein
AT3G19710.1	AT3G19710	1856	1634	1800	2929	824	534	468	582	8.08403	-1.88259	7.60768e-15	branched-chain aminotransferase4
AT1G72290.1	AT1G72290	570	523	996	540	193	210	141	213	4.06156	-1.89923	4.99381e-14	Kunitz family trypsin and protease inhibitor protein
AT3G25820.1	AT3G25820	37	57	94	74	0	0	0	0	0.919852	-9.07702	7.30801e-14	terpene synthase-like sequence-1,8-cineole
AT3G25830.1	AT3G25830	37	57	94	74	0	0	0	0	0.919852	-9.07702	7.30801e-14	terpene synthase-like sequence-1,8-cineole
AT4G33070.1	AT4G33070	148	151	72	103	0	1	0	0	1.56307	-8.46076	1.27334e-13	Thiamine pyrophosphate dependent pyruvate decarboxylase family protein
AT5G65110.2	AT5G65110	582	581	778	683	292	297	225	285	5.18296	-1.3707	1.73745e-13	acyl-CoA oxidase 2
AT2G26580.1	AT2G26580	204	232	283	300	47	58	9	27	3.71067	-2.99454	1.74359e-13	plant-specific transcription factor YABBY family protein
AT3G19700.1	AT3G19700	1644	1461	1602	2668	771	463	425	532	7.92079	-1.86029	3.75882e-13	Leucine-rich repeat protein kinase family protein
AT5G11090.1	AT5G11090	1301	985	1076	1117	412	627	537	503	6.67714	-1.23619	4.34289e-13	serine-rich protein-related
AT3G45140.1	AT3G45140	543	480	596	569	1123	1394	1292	1703	7.29078	1.21094	2.55824e-12	lipoxygenase 2
AT4G29010.1	AT4G29010	1419	1400	1933	1783	1050	992	937	1002	6.61583	-0.82086	2.55824e-12	Enoyl-CoA hydratase/isomerase family
AT1G75750.1	AT1G75750	11009	8447	9446	10369	2089	956	2151	1112	9.89596	-2.71344	2.70803e-12	GAST1 protein homolog 1
AT1G23200.1	AT1G23200	411	566	790	828	8	6	4	1	3.84655	-7.14856	3.22494e-12	Plant invertase/pectin methylesterase inhibitor superfamily
AT1G12330.1	AT1G12330	1672	1477	1866	1646	819	1124	667	951	6.61962	-1.03643	4.0043e-12	unknown protein
AT2G43100.1	AT2G43100	2556	2583	2852	3670	1448	1258	930	1284	8.26991	-1.36692	4.40207e-12	isopropylmalate isomerase 2
AT2G14247.1	AT2G14247	253	267	118	237	7	5	7	0	2.94951	-5.61581	6.47522e-12	Expressed protein
AT3G02020.1	AT3G02020	376	325	430	481	138	123	102	166	5.32384	-1.72497	8.22137e-12	aspartate kinase 3
AT1G12320.1	AT1G12320	937	694	976	824	402	477	387	451	5.96312	-1.11688	1.80851e-11	Protein of unknown function (DUF1442)
AT1G20470.1	AT1G20470	128	105	114	128	31	5	32	13	3.22016	-2.62119	2.14945e-11	SAUR-like auxin-responsive protein family
AT4G37980.1	AT4G37980	44	50	60	24	167	175	142	252	5.10178	1.91899	2.87863e-11	elicitor-activated gene 3-1
AT3G48000.1	AT3G48000	1307	1141	1688	1653	761	901	724	910	6.75692	-0.926698	5.46412e-11	aldehyde dehydrogenase 2B4
AT1G77110.1	AT1G77110	147	174	227	230	27	42	19	34	2.80949	-2.80119	1.0917e-10	Auxin efflux carrier family protein
AT5G43610.1	AT5G43610	303	346	407	367	6	12	4	23	3.06587	-5.12567	1.15826e-10	sucrose-proton symporter 6
AT1G09210.1	AT1G09210	1620	1639	2259	1988	1091	1184	867	1193	7.15546	-0.909048	1.49277e-10	calreticulin 1b
AT3G60780.1	AT3G60780	102	59	163	116	4	8	11	12	1.40259	-3.71806	1.85856e-10	Protein of unknown function (DUF1442)
AT1G12805.1	AT1G12805	53	45	23	45	0	0	0	0	0.172347	-8.47686	2.34938e-10	nucleotide binding
AT1G65970.1	AT1G65970	3191	3454	4946	4167	1623	1834	1127	1750	6.80592	-1.43491	2.40682e-10	thioredoxin-dependent peroxidase 2
AT1G74820.1	AT1G74820	51	24	62	22	0	0	0	0	0.0958223	-8.35585	2.89289e-10	RmlC-like cupins superfamily protein
AT3G13310.1	AT3G13310	531	326	267	319	127	149	105	156	4.48214	-1.57609	6.22277e-10	Chaperone DnaJ-domain superfamily protein
AT1G19640.1	AT1G19640	579	626	758	598	71	29	59	59	3.94507	-3.63775	6.31594e-10	jasmonic acid carboxyl methyltransferase
AT5G40350.1	AT5G40350	388	574	927	955	185	261	215	251	4.23012	-1.74378	6.31594e-10	myb domain protein 24
AT5G38120.1	AT5G38120	132	109	205	196	10	14	29	16	2.15181	-3.28122	6.92706e-10	AMP-dependent synthetase and ligase family protein
AT3G21270.1	AT3G21270	1128	1186	1481	1250	643	965	572	709	6.36337	-0.935013	8.33407e-10	DOF zinc finger protein 2
AT1G77080.4	AT1G77080	225	242	330	262	580	626	509	613	5.01462	1.02273	9.17586e-10	K-box region and MADS-box transcription factor family protein
AT1G12350.1	AT1G12350	312	285	280	275	139	153	122	162	4.2515	-1.13149	1.3366e-09	4-phospho-panto-thenoylcysteine synthetase
AT2G14670.1	AT2G14670	127	120	149	174	0	2	0	4	1.86019	-6.60867	1.74086e-09	sucrose-proton symporter 8
AT5G24580.1	AT5G24580	2252	2394	2996	2299	1023	1277	1141	1016	6.62983	-1.26974	5.3187e-09	Heavy metal transport/detoxification superfamily protein
AT3G16400.1	AT3G16400	676	705	1115	966	329	551	390	515	7.45936	-1.07309	7.00609e-09	nitrile specifier protein 1
AT3G03190.1	AT3G03190	134	140	132	164	37	27	44	46	3.55359	-1.99799	9.62238e-09	glutathione S-transferase F11
AT3G10340.1	AT3G10340	153	114	123	158	16	18	16	36	4.07251	-2.80254	1.00391e-08	phenylalanine ammonia-lyase 4
AT1G09155.1	AT1G09155	203	285	369	349	64	80	70	52	3.02773	-2.28372	1.02972e-08	phloem protein 2-B15
AT3G58990.1	AT3G58990	285	341	446	410	165	114	81	160	5.21413	-1.62415	1.03719e-08	isopropylmalate isomerase 1
AT5G24270.1	AT5G24270	656	522	805	744	207	301	180	283	4.4084	-1.61618	1.03719e-08	Calcium-binding EF-hand family protein
AT2G35920.1	AT2G35920	665	741	806	793	373	455	341	479	5.19248	-0.996105	1.33571e-08	RNA helicase family protein
AT2G38940.1	AT2G38940	55	76	109	86	8	0	5	0	1.27236	-4.64401	1.66751e-08	phosphate transporter 1;4
AT5G56870.1	AT5G56870	42	51	25	39	153	128	227	244	6.07382	2.12689	2.30683e-08	beta-galactosidase 4
AT5G46750.1	AT5G46750	583	544	607	590	324	377	259	308	5.50202	-1.00241	4.02684e-08	ARF-GAP domain 9
AT1G03620.1	AT1G03620	119	53	50	65	13	13	2	6	2.41367	-3.21598	6.17437e-08	ELMO/CED-12 family protein
AT4G04020.1	AT4G04020	458	349	493	507	125	209	137	271	5.07745	-1.41939	7.35726e-08	fibrillin
AT4G22780.1	AT4G22780	656	591	666	651	370	328	329	283	5.68743	-1.07982	8.43237e-08	ACT domain repeat 7
AT2G38900.1	AT2G38900	5	0	3	0	35	50	27	58	3.88738	4.19745	9.44887e-08	Serine protease inhibitor, potato inhibitor I-type family protein
AT4G14040.1	AT4G14040	361	479	494	667	237	220	222	274	6.65145	-1.18651	9.85055e-08	selenium-binding protein 2
AT5G39890.1	AT5G39890	348	340	275	302	94	85	49	84	3.31137	-2.16396	1.68848e-07	Protein of unknown function (DUF1637)
AT1G44970.1	AT1G44970	1163	1296	1624	1458	653	661	531	536	5.3506	-1.33036	1.99247e-07	Peroxidase superfamily protein
AT3G54820.1	AT3G54820	930	907	1563	1135	635	823	600	672	5.79083	-0.838427	2.43535e-07	plasma membrane intrinsic protein 2;5
AT1G16410.1	AT1G16410	144	198	227	336	91	61	12	82	5.74603	-2.01224	2.88493e-07	cytochrome p450 79f1
AT4G39940.1	AT4G39940	287	325	478	590	208	170	223	178	5.46193	-1.19583	5.7916e-07	APS-kinase 2
AT3G28580.1	AT3G28580	65	155	190	98	28	12	27	21	4.86042	-2.59931	6.61541e-07	P-loop containing nucleoside triphosphate hydrolases superfamily protein
AT1G62560.1	AT1G62560	527	435	637	787	239	301	249	293	5.77496	-1.25507	7.18014e-07	flavin-monooxygenase glucosinolate S-oxygenase 3
AT1G62480.1	AT1G62480	32582	36843	53501	48074	23027	30404	23495	25731	10.8968	-0.847517	7.24312e-07	Vacuolar calcium-binding protein-related
AT1G68825.1	AT1G68825	180	131	269	253	7	26	17	6	2.42626	-3.99179	7.24312e-07	ROTUNDIFOLIA like 15
AT5G42180.1	AT5G42180	15	15	22	0	0	1	0	3	6.47082	-3.65864	8.91187e-07	Peroxidase superfamily protein
AT5G06170.1	AT5G06170	141	134	142	192	1	6	0	10	1.99399	-5.30687	9.98164e-07	sucrose-proton symporter 9
AT2G16060.1	AT2G16060	775	584	302	721	169	195	146	167	4.37379	-1.97035	1.06495e-06	hemoglobin 1
AT2G37130.1	AT2G37130	3	3	3	3	11	38	38	19	3.93102	2.97576	1.18601e-06	Peroxidase superfamily protein
AT2G32510.1	AT2G32510	37	36	55	57	5	16	7	30	3.51915	-1.79728	2.11407e-06	mitogen-activated protein kinase kinase kinase 17
AT4G10265.1	AT4G10265	354	211	139	240	17	17	11	5	2.49483	-4.36837	2.24686e-06	Wound-responsive family protein
AT1G59730.1	AT1G59730	21	25	43	17	72	143	87	104	3.6777	1.81231	2.37537e-06	thioredoxin H-type 7
AT1G05680.1	AT1G05680	221	161	143	124	300	401	387	453	4.91318	1.10973	2.42447e-06	Uridine diphosphate glycosyltransferase 74E2
AT3G19680.1	AT3G19680	304	172	269	302	129	116	122	179	5.27335	-1.05255	2.46448e-06	Protein of unknown function (DUF1005)
AT2G17710.1	AT2G17710	231	194	318	210	444	614	401	487	6.16957	0.912032	4.18528e-06	unknown protein
AT5G26310.1	AT5G26310	252	401	635	402	52	91	51	57	3.45076	-2.86356	4.32384e-06	UDP-Glycosyltransferase superfamily protein
AT2G41905.1	AT2G41905	315	197	245	116	523	687	452	578	4.80033	1.22206	4.75977e-06	unknown protein
AT5G55050.1	AT5G55050	84	74	120	151	27	41	11	17	2.46707	-2.28623	4.86654e-06	GDSL-like Lipase/Acylhydrolase superfamily protein
AT5G49630.1	AT5G49630	179	207	297	298	505	583	542	730	5.45898	1.1558	5.6885e-06	amino acid permease 6
AT4G37870.1	AT4G37870	4234	4332	5098	4442	2708	3468	3042	3265	8.07667	-0.656866	6.20349e-06	phosphoenolpyruvate carboxykinase 1
AT5G24590.2	AT5G24590	856	820	894	885	558	601	517	620	6.11887	-0.713472	6.43419e-06	TCV-interacting protein
AT3G44990.1	AT3G44990	21	19	22	30	1	10	0	6	3.15347	-2.55171	6.68064e-06	xyloglucan endo-transglycosylase-related 8
AT1G63420.1	AT1G63420	176	163	226	210	294	482	315	455	5.13837	0.866666	7.05167e-06	Arabidopsis thaliana protein of unknown function (DUF821)
AT2G33510.2	AT2G33510	277	262	370	294	185	150	177	117	4.64224	-1.0278	7.32031e-06	unknown protein
AT1G66570.2	AT1G66570	86	40	37	55	0	0	0	0	0.590627	-8.85622	7.96939e-06	sucrose-proton symporter 7
AT1G05100.1	AT1G05100	88	80	110	144	14	16	36	8	2.32905	-2.57209	8.72959e-06	mitogen-activated protein kinase kinase kinase 18
AT5G59120.1	AT5G59120	685	722	971	801	342	305	254	239	4.43363	-1.58374	9.13266e-06	subtilase 4.13
AT1G07430.1	AT1G07430	287	183	399	252	608	666	730	678	5.63724	1.17116	1.16543e-05	highly ABA-induced PP2C gene 2
AT5G46760.1	AT5G46760	298	283	215	239	93	128	107	170	4.46247	-1.20453	1.29124e-05	Basic helix-loop-helix (bHLH) DNA-binding family protein
AT1G70890.1	AT1G70890	47	37	54	46	22	23	22	11	5.94637	-1.34391	1.29915e-05	MLP-like protein 43
AT1G23440.2	AT1G23440	137	80	125	97	2	41	24	30	3.12072	-2.3208	1.38262e-05	Peptidase C15, pyroglutamyl peptidase I-like
AT5G60760.1	AT5G60760	146	133	138	133	35	24	53	42	2.67952	-1.93255	1.59338e-05	P-loop containing nucleoside triphosphate hydrolases superfamily protein
AT1G77590.1	AT1G77590	939	939	1246	1129	645	767	619	692	6.23454	-0.758795	1.84266e-05	long chain acyl-CoA synthetase 9
AT4G31820.1	AT4G31820	268	180	384	200	119	98	42	154	4.85289	-1.4355	2.08194e-05	Phototropic-responsive NPH3 family protein
AT1G70680.1	AT1G70680	25	48	29	57	7	15	1	7	4.73449	-2.55981	2.17934e-05	Caleosin-related family protein
AT4G24275.1	AT4G24275	19	20	33	24	1	5	1	12	2.70364	-2.43498	2.57645e-05	unknown protein
AT4G16130.1	AT4G16130	202	301	258	188	408	575	452	600	4.94836	0.960127	2.82023e-05	arabinose kinase
AT2G22190.1	AT2G22190	19	4	25	26	82	59	53	66	3.28569	1.71723	2.88609e-05	Haloacid dehalogenase-like hydrolase (HAD) superfamily protein
AT1G10470.1	AT1G10470	329	236	317	367	187	247	95	156	5.09362	-1.00489	2.97963e-05	response regulator 4
AT1G24520.1	AT1G24520	184	101	110	49	498	286	314	411	3.94163	1.64284	3.61042e-05	homolog of Brassica campestris pollen protein 1
AT3G05020.1	AT3G05020	1064	1418	1664	1732	938	1016	757	952	6.59275	-0.801613	4.26314e-05	acyl carrier protein 1
AT1G09560.1	AT1G09560	491	501	663	516	311	340	175	269	5.62947	-1.11363	4.3798e-05	germin-like protein 5
AT4G34750.2	AT4G34750	274	244	340	284	139	173	116	135	4.30844	-1.13982	4.55282e-05	SAUR-like auxin-responsive protein family
AT1G64370.1	AT1G64370	52	94	190	124	199	316	349	385	6.33764	1.3552	5.43277e-05	unknown protein
AT4G13770.1	AT4G13770	1291	1550	1970	2333	1131	1188	894	1047	7.60171	-0.859971	5.48851e-05	cytochrome P450, family 83, subfamily A, polypeptide 1
AT5G26340.1	AT5G26340	177	143	226	202	70	65	73	43	4.00098	-1.66332	6.07798e-05	Major facilitator superfamily protein
AT5G26000.1	AT5G26000	2302	1679	2193	2184	1471	1554	1053	1613	7.69101	-0.68199	6.36904e-05	thioglucoside glucohydrolase 1
AT5G24655.1	AT5G24655	57	31	41	42	5	14	17	9	2.68657	-2.03143	6.37015e-05	response to low sulfur 4
AT3G25640.1	AT3G25640	374	390	499	323	136	163	116	231	6.54911	-1.4255	7.02206e-05	Protein of unknown function, DUF617
AT4G15530.2	AT4G15530	36	41	40	36	77	82	77	136	4.681	1.15052	7.27382e-05	pyruvate orthophosphate dikinase
AT2G28840.1	AT2G28840	2006	1720	2253	2113	1562	1462	993	1422	7.62516	-0.693874	7.46425e-05	XB3 ortholog 1 in Arabidopsis thaliana
AT5G10430.1	AT5G10430	183	140	221	153	71	113	56	79	5.32519	-1.25501	7.78431e-05	arabinogalactan protein 4
AT3G13520.1	AT3G13520	5655	4681	6946	5561	3966	4317	2779	3490	9.69036	-0.767972	8.08839e-05	arabinogalactan protein 12
AT1G78780.2	AT1G78780	520	479	598	569	330	429	289	397	4.88802	-0.711718	8.15129e-05	pathogenesis-related family protein
AT1G72430.1	AT1G72430	159	90	154	223	99	64	84	55	5.80204	-1.13962	9.13991e-05	SAUR-like auxin-responsive protein family
AT5G14200.2	AT5G14200	816	875	1015	1183	602	596	469	612	6.82347	-0.891049	9.37674e-05	isopropylmalate dehydrogenase 1
AT3G02550.1	AT3G02550	1145	850	808	809	280	336	180	175	4.7653	-2.03886	9.72081e-05	LOB domain-containing protein 41
AT1G67865.1	AT1G67865	5731	5768	5617	4902	2565	3625	2910	3098	8.94142	-0.986714	0.000100601	unknown protein
AT1G79700.2	AT1G79700	166	151	159	258	32	76	72	95	3.5312	-1.54873	0.000110625	Integrase-type DNA-binding superfamily protein
AT5G23010.1	AT5G23010	166	155	117	167	53	59	41	55	4.8203	-1.68314	0.000117814	methylthioalkylmalate synthase 1
AT1G12420.1	AT1G12420	737	586	691	747	457	475	294	410	5.59715	-0.884747	0.000122912	ACT domain repeat 8
AT5G19550.1	AT5G19550	436	437	413	398	251	210	186	203	5.07226	-1.10973	0.000133832	aspartate aminotransferase 2
AT5G10625.1	AT5G10625	0	0	1	0	2	7	16	22	1.51628	4.90391	0.000140965	unknown protein
AT2G28110.1	AT2G28110	32	46	29	29	7	8	10	7	2.75717	-2.20435	0.00014104	Exostosin family protein
AT5G47610.1	AT5G47610	21	10	19	32	81	53	56	108	2.78134	1.74462	0.00014215	RING/U-box superfamily protein
AT3G48100.1	AT3G48100	175	163	214	182	99	91	51	121	3.64123	-1.14699	0.000143975	response regulator 5
AT3G05640.1	AT3G05640	93	96	72	58	36	19	28	32	2.80408	-1.59323	0.000153899	Protein phosphatase 2C family protein
AT5G25120.1	AT5G25120	21	16	33	17	52	70	59	62	3.6722	1.36923	0.000155756	ytochrome p450, family 71, subfamily B, polypeptide 11
AT4G14480.1	AT4G14480	29	22	27	35	2	11	9	13	2.86767	-1.80611	0.000173278	Protein kinase superfamily protein
AT2G43550.1	AT2G43550	512	510	787	771	427	431	332	432	5.53685	-0.777884	0.000187251	Scorpion toxin-like knottin superfamily protein
AT4G08480.1	AT4G08480	231	112	214	195	81	73	81	78	4.07007	-1.36206	0.000193091	mitogen-activated protein kinase kinase kinase 9
AT1G33055.1	AT1G33055	1376	1049	293	828	252	194	152	155	5.16249	-2.40002	0.000195921	unknown protein
AT1G62333.1	AT1G62333	53	14	26	16	100	186	159	173	3.15602	2.36505	0.000203995	unknown protein
AT3G62540.1	AT3G62540	5	1	8	8	23	27	18	52	1.54749	2.30458	0.000214748	Pentatricopeptide repeat (PPR) superfamily protein
AT5G17860.1	AT5G17860	70	59	120	74	171	186	177	190	3.98155	1.06791	0.000227602	calcium exchanger 7
AT1G13110.1	AT1G13110	15	11	9	4	3	1	0	0	3.85772	-3.25814	0.000235676	cytochrome P450, family 71 subfamily B, polypeptide 7
AT2G22800.1	AT2G22800	180	211	199	231	89	128	76	95	3.24683	-1.2205	0.000249334	Homeobox-leucine zipper protein family
AT4G08555.1	AT4G08555	13	14	8	6	0	0	3	2	3.8078	-3.04115	0.00025097	unknown protein
AT4G17030.1	AT4G17030	0	0	0	0	2	15	11	0	2.07524	5.77251	0.000262878	expansin-like B1
AT5G10040.1	AT5G10040	20	41	21	13	0	0	1	2	-0.307849	-4.91924	0.000263952	unknown protein
AT1G71710.1	AT1G71710	217	195	293	190	124	109	148	155	4.56175	-0.838123	0.000293136	DNAse I-like superfamily protein
AT2G17880.1	AT2G17880	1067	772	638	902	430	465	579	583	5.68672	-0.84405	0.000310427	Chaperone DnaJ-domain superfamily protein
AT5G65080.1	AT5G65080	28	28	26	36	83	91	133	114	2.54539	1.72135	0.000346379	K-box region and MADS-box transcription factor family protein
AT1G76650.2	AT1G76650	418	256	148	276	51	57	109	57	4.04422	-2.11919	0.000390771	calmodulin-like 38
AT1G22530.1	AT1G22530	572	344	373	342	306	265	207	196	7.35278	-0.868872	0.000396601	PATELLIN 2
AT4G24120.1	AT4G24120	259	213	311	338	166	139	138	152	4.54354	-1.01723	0.000416841	YELLOW STRIPE like 1
AT5G01300.1	AT5G01300	0	0	0	0	8	8	9	13	-0.481558	6.21274	0.000428646	PEBP (phosphatidylethanolamine-binding protein) family protein
AT1G24100.1	AT1G24100	1379	1260	1623	1909	1090	1024	928	919	7.60582	-0.748043	0.000436234	UDP-glucosyl transferase 74B1
AT4G12970.1	AT4G12970	123	96	115	98	282	198	227	220	4.06892	0.994851	0.000454616	stomagen
AT3G26140.1	AT3G26140	292	345	332	259	158	135	117	187	3.21107	-1.16979	0.000495023	Cellulase (glycosyl hydrolase family 5) protein
AT1G64780.1	AT1G64780	150	150	225	216	87	152	85	120	4.3302	-0.864051	0.000497218	ammonium transporter 1;2
AT4G30110.1	AT4G30110	64	70	30	23	149	177	153	117	3.2059	1.51447	0.000510452	heavy metal atpase 2
AT5G23020.1	AT5G23020	2	13	9	0	0	0	0	0	2.73522	-5.68738	0.00053523	2-isopropylmalate synthase 2
AT5G07460.1	AT5G07460	374	374	609	567	304	329	230	173	5.7449	-0.993584	0.000545379	peptidemethionine sulfoxide reductase 2
AT4G17900.1	AT4G17900	328	289	391	313	178	183	241	221	5.19731	-0.784709	0.000570036	PLATZ transcription factor family protein
AT3G48280.1	AT3G48280	19	37	43	51	21	10	8	9	2.93827	-1.73714	0.000575941	cytochrome P450, family 71, subfamily A, polypeptide 25
AT1G65480.1	AT1G65480	989	907	886	647	300	597	316	400	7.01163	-1.24406	0.000582463	PEBP (phosphatidylethanolamine-binding protein) family protein
AT3G11430.1	AT3G11430	19	24	27	14	0	0	1	0	-0.00779285	-5.89686	0.000593233	glycerol-3-phosphate acyltransferase 5
AT4G34135.1	AT4G34135	69	108	108	139	13	23	21	42	2.50468	-2.22962	0.000599942	UDP-glucosyltransferase 73B2
AT4G36988.1	AT4G36988	596	522	595	467	348	416	359	247	6.13812	-0.787062	0.000599942	conserved peptide upstream open reading frame 49
AT4G36990.1	AT4G36990	596	522	595	467	348	416	359	247	6.13812	-0.787062	0.000599942	heat shock factor 4
AT1G22370.1	AT1G22370	0	0	0	0	3	1	7	14	2.68188	5.62223	0.000602281	UDP-glucosyl transferase 85A5
AT3G22740.1	AT3G22740	63	55	129	189	44	18	29	23	2.57058	-1.99169	0.000608926	homocysteine S-methyltransferase 3
AT2G18360.1	AT2G18360	5	5	12	14	0	0	0	0	-0.310347	-6.22601	0.000700523	alpha/beta-Hydrolases superfamily protein
AT5G44630.1	AT5G44630	636	638	732	735	401	247	221	260	4.27762	-1.38705	0.000715084	Terpenoid cyclases/Protein prenyltransferases superfamily protein
AT2G41640.1	AT2G41640	9	4	11	19	0	0	3	0	1.47952	-3.7101	0.00077209	Glycosyltransferase family 61 protein
AT2G46650.1	AT2G46650	233	293	465	466	216	199	169	171	5.3881	-1.04403	0.000818991	cytochrome B5 isoform C
AT5G33370.1	AT5G33370	347	366	1202	602	1565	1339	1308	1704	6.3689	1.17507	0.000825367	GDSL-like Lipase/Acylhydrolase superfamily protein
AT2G20610.2	AT2G20610	418	454	580	609	375	317	311	360	5.86592	-0.703718	0.000849037	Tyrosine transaminase family protein
AT5G38710.1	AT5G38710	113	81	187	105	27	43	29	0	2.59145	-2.37287	0.000918237	Methylenetetrahydrofolate reductase family protein
AT1G78370.1	AT1G78370	3878	4368	5640	6440	3168	3065	2242	3662	9.4329	-0.863115	0.000958195	glutathione S-transferase TAU 20
AT4G19520.1	AT4G19520	0	0	0	0	0	2	14	13	1.74121	5.85376	0.00103713	disease resistance protein (TIR-NBS-LRR class) family
AT1G01480.1	AT1G01480	16	10	13	12	3	0	0	0	1.45556	-3.9785	0.00105178	1-amino-cyclopropane-1-carboxylate synthase 2
AT1G01610.1	AT1G01610	836	780	992	842	1217	1619	1254	1267	7.17297	0.514451	0.00110372	glycerol-3-phosphate acyltransferase 4
AT3G49120.1	AT3G49120	327	154	197	187	163	115	56	100	4.60674	-1.12556	0.00124074	peroxidase CB
AT3G57690.1	AT3G57690	102	61	75	26	250	209	161	230	3.06759	1.55722	0.00126827	arabinogalactan protein 23
AT4G01680.3	AT4G01680	3	3	2	0	6	9	24	29	1.67381	2.89921	0.00134671	myb domain protein 55
AT5G11060.1	AT5G11060	65	84	86	49	157	165	135	168	4.80194	1.01211	0.0013605	KNOTTED1-like homeobox gene 4
AT1G69880.1	AT1G69880	52	62	31	77	17	10	15	20	2.73682	-1.96731	0.00137381	thioredoxin H-type 8
AT5G53750.1	AT5G53750	242	285	405	374	190	229	152	227	4.93899	-0.828648	0.00154722	CBS domain-containing protein
AT5G22500.1	AT5G22500	315	202	396	446	124	151	126	136	4.99454	-1.44177	0.00162604	fatty acid reductase 1
AT3G22620.1	AT3G22620	58	74	72	66	25	25	24	23	2.6908	-1.59248	0.00168473	Bifunctional inhibitor/lipid-transfer protein/seed storage 2S albumin superfamily protein
AT5G63160.1	AT5G63160	485	464	449	499	241	391	222	337	6.30792	-0.820005	0.00168473	BTB and TAZ domain protein 1
AT1G55330.1	AT1G55330	3646	3105	5232	3968	3327	3036	2145	2585	9.01662	-0.627514	0.00177233	arabinogalactan protein 21
AT5G39580.1	AT5G39580	0	0	1	0	12	4	13	14	1.00068	4.80798	0.00178379	Peroxidase superfamily protein
AT1G80130.1	AT1G80130	0	0	7	8	24	18	28	5	2.65512	2.23086	0.00183756	Tetratricopeptide repeat (TPR)-like superfamily protein
AT4G21850.1	AT4G21850	2	14	16	15	3	0	0	5	2.89772	-2.59232	0.00205804	methionine sulfoxide reductase B9
AT1G77210.2	AT1G77210	20	15	17	7	35	62	28	54	3.05933	1.44701	0.00208724	sugar transporter 14
AT1G03610.1	AT1G03610	783	821	456	570	295	447	352	367	5.75239	-1.00809	0.00221254	Protein of unknown function (DUF789)
AT5G05960.1	AT5G05960	23	8	40	38	1	7	0	11	2.7241	-2.617	0.00222511	Bifunctional inhibitor/lipid-transfer protein/seed storage 2S albumin superfamily protein
AT1G06080.1	AT1G06080	227	286	339	304	137	127	153	116	3.80735	-1.21506	0.00229526	delta 9 desaturase 1
AT1G28230.1	AT1G28230	125	118	194	152	263	303	270	234	4.51213	0.759458	0.00231154	purine permease 1
AT1G56100.2	AT1G56100	70	94	123	43	307	348	238	319	4.76931	1.75665	0.00232147	Plant invertase/pectin methylesterase inhibitor superfamily protein
AT1G32170.1	AT1G32170	214	93	163	95	60	95	74	82	5.00506	-0.983783	0.00232466	xyloglucan endotransglucosylase/hydrolase 30
AT1G17960.1	AT1G17960	155	144	166	146	27	55	14	10	2.30231	-2.68099	0.00261	Threonyl-tRNA synthetase
AT1G65860.1	AT1G65860	164	201	310	303	104	145	103	129	4.1544	-1.13548	0.00267022	flavin-monooxygenase glucosinolate S-oxygenase 1
AT1G32540.1	AT1G32540	958	875	1281	1164	774	799	557	773	6.18301	-0.674755	0.00276655	lsd one like 1
AT4G19420.2	AT4G19420	103	105	86	67	151	210	154	242	6.16983	0.920373	0.00286893	Pectinacetylesterase family protein
AT3G06770.2	AT3G06770	135	107	125	122	88	86	56	39	4.43804	-0.981014	0.0028935	Pectin lyase-like superfamily protein
AT1G70670.1	AT1G70670	346	301	330	342	168	173	152	214	4.65273	-1.02606	0.00291585	Caleosin-related family protein
AT4G04630.1	AT4G04630	129	149	79	119	242	303	212	317	4.63861	1.01298	0.00298439	Protein of unknown function, DUF584
AT1G22230.1	AT1G22230	11	25	26	46	16	4	0	11	2.74507	-1.90044	0.00301455	unknown protein
AT2G46680.1	AT2G46680	96	114	115	99	191	227	354	315	4.9974	1.24986	0.00309591	homeobox 7
AT3G49930.1	AT3G49930	18	20	17	16	0	5	0	0	0.920864	-3.88493	0.00318758	C2H2 and C2HC zinc fingers superfamily protein
AT5G15265.1	AT5G15265	33	15	24	16	2	2	4	4	0.262734	-2.93266	0.00326007	unknown protein
AT2G47280.1	AT2G47280	7	6	8	10	0	1	0	0	-1.25786	-4.50047	0.0033751	Pectin lyase-like superfamily protein
AT3G27940.1	AT3G27940	0	0	0	0	8	10	12	0	0.346045	5.90689	0.00386931	LOB domain-containing protein 26
AT3G47480.1	AT3G47480	0	0	0	0	0	3	13	5	2.28487	5.40565	0.00416307	Calcium-binding EF-hand family protein
AT5G66690.1	AT5G66690	25	3	3	10	0	1	0	0	-0.345459	-4.93661	0.00421119	UDP-Glycosyltransferase superfamily protein
AT2G39310.1	AT2G39310	57	48	83	94	18	24	36	30	3.36125	-1.47272	0.00439129	jacalin-related lectin 22
AT4G19500.1	AT4G19500	0	0	0	0	0	9	8	4	3.27602	5.36374	0.00452605	nucleoside-triphosphatases;transmembrane receptors;nucleotide binding;ATP binding
AT2G26690.1	AT2G26690	106	154	170	163	216	312	234	324	5.02551	0.744264	0.00461954	Major facilitator superfamily protein
AT5G15120.1	AT5G15120	1135	884	677	697	274	370	239	277	4.73085	-1.70295	0.00468552	Protein of unknown function (DUF1637)
AT4G03050.1	AT4G03050	447	448	555	742	393	367	300	280	5.59966	-0.819665	0.0049116	2-oxoglutarate (2OG) and Fe(II)-dependent oxygenase superfamily protein
AT5G10140.1	AT5G10140	0	0	0	0	7	1	14	0	1.85927	5.51544	0.00505334	K-box region and MADS-box transcription factor family protein
AT1G74840.2	AT1G74840	1074	971	979	810	714	762	570	743	6.58751	-0.59255	0.00520261	Homeodomain-like superfamily protein
AT3G20300.1	AT3G20300	24	8	16	9	53	40	72	26	2.97341	1.65858	0.00520261	Protein of unknown function (DUF3537)
AT1G52342.1	AT1G52342	16	13	6	7	0	6	0	5	3.85002	-2.0335	0.0054094	unknown protein
AT1G74090.1	AT1G74090	528	531	647	843	342	373	320	500	5.90744	-0.853934	0.00545615	desulfo-glucosinolate sulfotransferase 18
AT1G07000.1	AT1G07000	43	15	37	49	15	19	11	10	3.10372	-1.49381	0.00561304	exocyst subunit exo70 family protein B2
AT4G30530.1	AT4G30530	765	758	1174	1058	707	752	583	659	6.76083	-0.581984	0.0057701	Class I glutamine amidotransferase-like superfamily protein
AT5G66985.1	AT5G66985	81	57	63	84	8	0	0	4	0.983098	-4.61652	0.00587129	unknown protein
AT1G70830.4	AT1G70830	3303	3838	5725	4704	3250	2893	2408	3110	7.81181	-0.694409	0.00589638	MLP-like protein 28
AT1G35260.1	AT1G35260	168	185	176	194	88	104	64	134	3.66964	-1.03344	0.0060721	MLP-like protein 165
AT3G11230.2	AT3G11230	262	202	289	302	182	200	183	193	4.96529	-0.589086	0.0060721	Yippee family putative zinc-binding protein
AT1G01290.2	AT1G01290	76	43	72	65	25	11	32	41	2.53475	-1.32297	0.0061663	cofactor of nitrate reductase and xanthine dehydrogenase 3
AT5G21105.3	AT5G21105	126	139	138	157	71	111	58	117	3.79211	-0.793112	0.00653721	Plant L-ascorbate oxidase
AT5G24770.1	AT5G24770	908	1114	1846	1434	691	742	611	1078	7.51737	-0.871361	0.00662394	vegetative storage protein 2
AT3G57040.1	AT3G57040	777	601	415	596	382	485	314	439	5.62615	-0.716881	0.00672561	response regulator 9
AT4G23010.3	AT4G23010	286	284	366	265	129	226	241	156	4.66678	-0.782976	0.00674815	UDP-galactose transporter 2
AT3G13400.1	AT3G13400	72	16	47	34	179	145	98	182	2.41439	1.71842	0.00691465	SKU5 similar 13
AT5G03930.1	AT5G03930	7	6	8	7	0	0	0	0	-1.16524	-5.89237	0.00691465	unknown protein
AT3G44735.1	AT3G44735	1751	1744	2428	2042	1501	1705	1226	1331	6.66454	-0.580953	0.0069536	PHYTOSULFOKINE 3 PRECURSOR
AT3G01270.1	AT3G01270	100	52	55	21	190	216	168	222	2.93179	1.65871	0.00705732	Pectate lyase family protein
AT5G28300.1	AT5G28300	1329	1145	1457	1147	1881	2374	2074	1945	7.29354	0.587742	0.00705732	Duplicated homeodomain-like superfamily protein
AT5G44730.2	AT5G44730	295	288	206	222	123	132	91	204	3.90789	-1.03612	0.00716733	Haloacid dehalogenase-like hydrolase (HAD) superfamily protein
AT5G24150.2	AT5G24150	40	47	72	79	27	41	27	31	3.91861	-1.03019	0.00738118	FAD/NAD(P)-binding oxidoreductase family protein
AT5G18860.1	AT5G18860	102	117	121	77	43	43	56	75	3.36884	-1.06171	0.00740302	inosine-uridine preferring nucleoside hydrolase family protein
AT5G52390.1	AT5G52390	2	6	0	0	19	7	13	34	1.45725	2.952	0.00753886	PAR1 protein
AT1G33440.1	AT1G33440	3	10	5	5	0	0	0	0	0.672805	-5.64147	0.00756213	Major facilitator superfamily protein
AT3G27880.1	AT3G27880	140	120	168	141	246	237	241	238	4.40068	0.650466	0.00784914	Protein of unknown function (DUF1645)
AT3G29370.1	AT3G29370	539	449	564	498	293	313	247	262	4.61811	-0.997054	0.00811131	unknown protein
AT4G35770.2	AT4G35770	40	34	12	16	43	49	96	208	3.84103	1.78135	0.00811131	Rhodanese/Cell cycle control phosphatase superfamily protein
AT2G20880.1	AT2G20880	12	9	6	11	0	0	3	0	1.03592	-3.56117	0.00814245	Integrase-type DNA-binding superfamily protein
AT3G14990.2	AT3G14990	625	653	632	536	815	1035	923	1164	6.26916	0.554049	0.00841306	Class I glutamine amidotransferase-like superfamily protein
AT2G39800.2	AT2G39800	844	830	627	635	1079	1302	1249	1571	6.6339	0.682051	0.00848324	delta1-pyrroline-5-carboxylate synthase 1
AT4G18540.1	AT4G18540	45	38	70	80	16	18	19	24	0.868264	-1.69157	0.00848992	unknown protein
AT2G40260.1	AT2G40260	1	6	6	8	0	0	0	0	1.11988	-5.4834	0.0085461	Homeodomain-like superfamily protein
AT5G45880.1	AT5G45880	121	60	80	14	271	251	164	337	3.23258	1.75249	0.0085461	Pollen Ole e 1 allergen and extensin family protein
AT5G48880.3	AT5G48880	626	576	1066	963	555	488	447	434	5.55769	-0.836523	0.0085526	peroxisomal 3-keto-acyl-CoA thiolase 2
AT2G18300.1	AT2G18300	27	25	18	19	5	3	13	16	4.88447	-1.37906	0.00869358	basic helix-loop-helix (bHLH) DNA-binding superfamily protein
AT1G62500.1	AT1G62500	6118	5147	5919	6300	4358	4342	3250	3501	7.91907	-0.726094	0.00890255	Bifunctional inhibitor/lipid-transfer protein/seed storage 2S albumin superfamily protein
AT5G28020.2	AT5G28020	44	30	31	24	80	81	62	78	3.93349	1.09002	0.00890255	cysteine synthase D2
AT5G52450.1	AT5G52450	49	47	96	68	108	196	86	116	4.21312	0.837005	0.00894042	MATE efflux family protein
AT2G47050.1	AT2G47050	177	94	149	91	343	331	233	329	4.18667	1.15237	0.00911225	Plant invertase/pectin methylesterase inhibitor superfamily protein
AT1G56660.1	AT1G56660	2197	2037	2251	1473	2133	4423	6523	3598	8.96449	0.964795	0.00913732	unknown protein
AT1G06830.1	AT1G06830	115	67	117	132	50	64	24	60	3.05464	-1.254	0.00916875	Glutaredoxin family protein
AT2G46330.2	AT2G46330	2222	1843	2064	1642	1486	1673	1285	1617	8.43264	-0.488329	0.00918401	arabinogalactan protein 16
AT3G50700.1	AT3G50700	22	23	23	18	65	50	60	32	3.75699	1.16007	0.00926291	indeterminate(ID)-domain 2
AT1G59620.1	AT1G59620	34	49	31	38	84	65	84	103	3.15497	1.01567	0.0095811	Disease resistance protein (CC-NBS-LRR class) family
AT2G32550.1	AT2G32550	12	4	0	4	0	0	0	0	2.20573	-5.4618	0.00974308	Cell differentiation, Rcd1-like protein
AT4G29310.1	AT4G29310	138	133	146	132	97	107	52	59	3.83057	-0.932669	0.00974308	Protein of unknown function (DUF1005)
AT5G19160.1	AT5G19160	67	58	79	63	110	127	102	191	3.13294	0.862213	0.00974308	TRICHOME BIREFRINGENCE-LIKE 11
AT2G47040.1	AT2G47040	264	195	173	48	502	535	426	499	4.25928	1.38378	0.00974607	Plant invertase/pectin methylesterase inhibitor superfamily
AT4G34680.2	AT4G34680	118	132	127	148	60	64	70	86	3.20974	-1.02926	0.00974607	GATA transcription factor 3
AT5G44120.1	AT5G44120	61	27	45	37	3	12	18	7	2.53371	-2.17395	0.00974607	RmlC-like cupins superfamily protein
AT5G64000.1	AT5G64000	2	6	18	1	0	0	0	0	0.474622	-5.78063	0.00983719	Inositol monophosphatase family protein
AT4G34290.1	AT4G34290	550	623	609	598	860	1015	810	924	5.85679	0.471546	0.0099311	SWIB/MDM2 domain superfamily protein
AT1G35230.1	AT1G35230	9	21	11	9	34	24	73	48	4.57704	1.72793	0.0100227	arabinogalactan protein 5
AT4G38410.1	AT4G38410	2	0	0	0	28	9	3	8	1.55666	4.1752	0.0100227	Dehydrin family protein
AT1G50290.1	AT1G50290	1517	1245	1360	1162	1011	1238	875	1018	6.87515	-0.484025	0.0100634	unknown protein
AT2G25490.1	AT2G25490	2050	1414	1537	1900	1089	1457	1116	1457	7.35669	-0.567098	0.0100634	EIN3-binding F box protein 1
AT1G11785.1	AT1G11785	0	3	4	4	11	25	20	22	1.08794	2.65619	0.010109	unknown protein
AT3G55646.1	AT3G55646	10	22	1	29	0	5	0	0	0.796953	-3.73285	0.0101264	unknown protein
AT4G23600.2	AT4G23600	70	33	95	123	235	260	212	278	4.33104	1.51925	0.0101264	Tyrosine transaminase family protein
AT5G10180.1	AT5G10180	155	180	181	270	299	365	391	342	5.9146	0.714851	0.0101264	slufate transporter 2;1
AT2G28400.1	AT2G28400	55	73	46	45	141	155	199	134	4.46922	1.39495	0.0101637	Protein of unknown function, DUF584
AT1G78460.1	AT1G78460	65	66	42	47	128	125	105	125	4.42073	0.992518	0.010256	SOUL heme-binding family protein
AT5G58650.1	AT5G58650	52	67	94	79	136	151	132	124	4.68548	0.787174	0.0105585	plant peptide containing sulfated tyrosine 1
AT1G12200.1	AT1G12200	129	111	205	129	206	315	252	272	4.60448	0.75671	0.0109515	Flavin-binding monooxygenase family protein
AT3G45730.1	AT3G45730	0	0	0	2	19	8	0	3	2.93517	3.50784	0.0114978	unknown protein
AT2G38640.1	AT2G38640	257	268	314	293	173	263	173	186	4.70871	-0.638395	0.0116295	Protein of unknown function (DUF567)
AT3G54600.1	AT3G54600	1060	1069	1260	1623	999	892	643	931	6.93147	-0.653206	0.0118649	Class I glutamine amidotransferase-like superfamily protein
AT2G38250.1	AT2G38250	13	5	17	17	17	50	53	36	2.35718	1.47704	0.0119897	Homeodomain-like superfamily protein
AT3G10300.1	AT3G10300	0	0	0	0	3	15	9	5	-0.809833	5.94596	0.0119913	Calcium-binding EF-hand family protein
AT2G34790.1	AT2G34790	110	122	146	123	220	248	186	266	4.60299	0.752327	0.0125048	FAD-binding Berberine family protein
ATMG00580.1	ATMG00580	61	55	92	53	29	41	30	30	2.36657	-1.11287	0.0125196	NADH dehydrogenase subunit 4
AT1G08465.1	AT1G08465	407	451	450	480	834	826	682	692	6.01799	0.640786	0.0126824	Plant-specific transcription factor YABBY family protein
AT1G49320.1	AT1G49320	79	108	104	149	138	247	215	287	4.05161	0.877677	0.0126824	unknown seed protein like 1
AT4G26850.1	AT4G26850	3159	3256	3903	3835	4705	5862	4853	6407	9.04647	0.501282	0.0126824	mannose-1-phosphate guanylyltransferase (GDP)s;GDP-galactose:mannose-1-phosphate guanylyltransferases;GDP-galactose:glucose-1-phosphate guanylyltransferases;GDP-galactose:myoinositol-1-phosphate guanylyltransferases;glucose-1-phosphate guanylyltransferase
AT1G07590.1	AT1G07590	20718	18339	19725	22994	14333	18559	13620	16772	11.3144	-0.502615	0.0127799	Tetratricopeptide repeat (TPR)-like superfamily protein
AT4G32870.1	AT4G32870	29	12	27	39	14	14	4	1	2.40019	-1.7954	0.0127799	Polyketide cyclase/dehydrase and lipid transport superfamily protein
AT5G04860.1	AT5G04860	186	168	264	241	125	148	126	148	3.96765	-0.759945	0.0127799	unknown protein
AT2G18890.2	AT2G18890	213	125	188	172	120	143	100	98	4.02487	-0.717659	0.0127981	Protein kinase superfamily protein
AT3G11110.1	AT3G11110	13	7	18	8	0	0	6	0	1.38966	-2.88659	0.0129781	RING/U-box superfamily protein
AT4G34050.1	AT4G34050	1771	1752	3117	2635	1477	1654	1251	1747	8.14145	-0.70206	0.0130393	S-adenosyl-L-methionine-dependent methyltransferases superfamily protein
AT1G06160.1	AT1G06160	5	3	12	1	17	21	8	33	2.46443	1.76974	0.0131795	octadecanoid-responsive Arabidopsis AP2/ERF 59
AT1G04250.1	AT1G04250	1180	1234	1288	1194	754	881	717	699	6.10387	-0.806747	0.013471	AUX/IAA transcriptional regulator family protein
AT1G66240.2	AT1G66240	1507	1491	2003	1690	1302	1543	1243	1380	7.59602	-0.406313	0.0139164	homolog of anti-oxidant 1
AT1G07600.1	AT1G07600	1423	1197	1295	1356	960	1206	1062	923	7.43014	-0.467224	0.0141082	metallothionein 1A
AT1G76240.1	AT1G76240	12	15	42	35	3	14	5	0	2.05575	-2.32034	0.0144277	Arabidopsis protein of unknown function (DUF241)
AT1G22590.1	AT1G22590	214	140	133	193	318	373	228	312	5.69005	0.713971	0.0144684	AGAMOUS-like 87
AT4G38860.1	AT4G38860	310	235	316	229	190	163	86	233	5.30904	-0.830232	0.0149226	SAUR-like auxin-responsive protein family
AT1G18590.1	AT1G18590	248	252	393	536	276	195	173	188	5.34962	-0.874785	0.0149258	sulfotransferase 17
AT1G09810.1	AT1G09810	113	129	125	161	83	80	67	100	3.42222	-0.8047	0.0152066	evolutionarily conserved C-terminal region 11
AT1G52280.1	AT1G52280	393	297	462	386	230	311	251	277	4.98754	-0.639232	0.0154619	RAB GTPase homolog G3D
AT5G63370.1	AT5G63370	456	416	526	532	339	460	342	385	5.56132	-0.46188	0.0155783	Protein kinase superfamily protein
AT4G24000.1	AT4G24000	369	402	642	453	829	926	899	784	5.86626	0.786742	0.015639	cellulose synthase like G2
AT1G20980.1	AT1G20980	2350	2088	3163	2400	3121	4253	3440	3782	7.88761	0.432497	0.0161126	squamosa promoter binding protein-like 14
AT2G22680.1	AT2G22680	227	243	224	246	75	65	97	165	3.57775	-1.35243	0.0169094	Zinc finger (C3HC4-type RING finger) family protein
AT1G05310.1	AT1G05310	1	4	12	12	22	31	31	26	1.31731	1.82171	0.016991	Pectin lyase-like superfamily protein
AT1G70230.1	AT1G70230	17	24	24	17	22	69	59	75	3.08777	1.31443	0.016991	TRICHOME BIREFRINGENCE-LIKE 27
AT4G24580.1	AT4G24580	0	0	0	0	9	1	10	8	-0.73792	5.82803	0.0169925	Rho GTPase activation protein (RhoGAP) with PH domain
AT5G62430.1	AT5G62430	80	92	83	80	52	49	49	37	3.89595	-0.95902	0.0169925	cycling DOF factor 1
AT5G39160.1	AT5G39160	0	1	1	0	5	11	10	7	2.39889	3.64079	0.0173658	RmlC-like cupins superfamily protein
AT5G02090.1	AT5G02090	23	9	17	13	29	40	68	49	2.35023	1.48229	0.0176661	unknown protein
AT1G59700.1	AT1G59700	12	20	17	10	39	28	39	29	3.29599	1.07919	0.0177988	glutathione S-transferase TAU 16
AT5G39190.1	AT5G39190	0	2	1	0	5	14	10	10	2.48023	3.36554	0.017887	germin-like protein 2
AT1G29460.1	AT1G29460	26	11	23	24	7	14	3	1	1.62771	-1.85975	0.0181985	SAUR-like auxin-responsive protein family
AT2G37760.1	AT2G37760	46	85	58	75	131	148	205	157	4.00554	1.16025	0.0186609	NAD(P)-linked oxidoreductase superfamily protein
AT1G78110.1	AT1G78110	1451	1289	1796	1329	959	1350	1198	1168	6.82158	-0.440826	0.0192324	unknown protein
AT1G77120.1	AT1G77120	93	134	134	125	40	93	58	61	2.91667	-1.08645	0.0192886	alcohol dehydrogenase 1
AT3G61890.1	AT3G61890	143	171	182	116	202	229	376	358	5.4844	0.821999	0.0193255	homeobox 12
AT4G24130.1	AT4G24130	546	536	839	679	357	434	338	260	5.13381	-1.00665	0.0193255	Protein of unknown function, DUF538
AT5G46740.1	AT5G46740	112	171	191	186	110	78	68	113	3.47196	-0.953128	0.0196533	ubiquitin-specific protease 21
AT2G22540.1	AT2G22540	57	45	36	44	25	35	25	22	4.44406	-0.897954	0.019679	K-box region and MADS-box transcription factor family protein
AT2G32150.1	AT2G32150	394	534	674	684	997	924	956	1196	6.5619	0.726503	0.0198153	Haloacid dehalogenase-like hydrolase (HAD) superfamily protein
AT5G65140.1	AT5G65140	245	155	260	242	78	167	122	82	3.76163	-1.12266	0.0200871	Haloacid dehalogenase-like hydrolase (HAD) superfamily protein
AT3G11930.2	AT3G11930	197	207	144	177	278	276	406	397	7.51372	0.778229	0.0204346	Adenine nucleotide alpha hydrolases-like superfamily protein
AT1G61810.1	AT1G61810	44	40	28	35	33	124	81	109	4.51345	1.07428	0.0211628	beta-glucosidase 45
AT3G25290.2	AT3G25290	446	513	723	413	263	425	275	304	6.44785	-0.846709	0.0213568	Auxin-responsive family protein
AT4G17340.1	AT4G17340	7	13	8	18	3	6	6	1	4.75129	-1.61676	0.0213568	tonoplast intrinsic protein 2;2
AT2G04170.3	AT2G04170	0	1	0	0	3	7	6	5	1.05715	3.73438	0.0216427	TRAF-like family protein
AT5G15140.1	AT5G15140	144	155	133	32	332	278	230	408	3.70692	1.28292	0.0218313	Galactose mutarotase-like superfamily protein
AT3G58010.1	AT3G58010	61	82	65	79	41	50	26	34	3.12919	-1.06699	0.0224108	plastoglobulin 34kD
AT1G76890.2	AT1G76890	471	397	449	363	282	416	237	355	5.76809	-0.521818	0.0229543	Duplicated homeodomain-like superfamily protein
AT3G49540.1	AT3G49540	205	98	103	60	455	377	198	342	3.73212	1.41023	0.0232497	unknown protein
AT5G22390.1	AT5G22390	134	121	112	142	82	104	65	94	3.99424	-0.699082	0.0232497	Protein of unknown function (DUF3049)
AT5G64770.1	AT5G64770	10	10	29	31	3	8	13	4	4.7189	-1.577	0.0236764	unknown protein
AT2G42570.1	AT2G42570	865	1061	1743	1220	902	952	738	892	5.93281	-0.589575	0.0237827	TRICHOME BIREFRINGENCE-LIKE 39
AT5G14330.1	AT5G14330	0	0	12	5	0	0	0	0	1.21818	-5.12396	0.0246782	unknown protein
AT2G23690.1	AT2G23690	355	308	327	273	262	235	181	252	5.3416	-0.569024	0.0250066	unknown protein
AT3G23170.1	AT3G23170	149	92	120	131	77	106	55	60	3.934	-0.855936	0.0252052	unknown protein
AT5G07010.1	AT5G07010	34	78	86	69	15	11	10	16	1.3939	-2.4607	0.0255647	sulfotransferase 2A
AT4G10260.1	AT4G10260	146	81	62	81	19	24	11	9	1.43414	-2.70239	0.0260349	pfkB-like carbohydrate kinase family protein
AT1G64130.1	AT1G64130	16	1	4	0	0	0	0	0	0.0706106	-5.50517	0.0263612	Polyketide cyclase/dehydrase and lipid transport superfamily protein
AT1G19960.1	AT1G19960	158	221	366	213	130	142	125	168	5.41462	-0.860734	0.026392	unknown protein
AT5G17700.1	AT5G17700	209	104	216	202	260	385	295	318	5.45472	0.670284	0.0267384	MATE efflux family protein
AT5G17450.2	AT5G17450	28	12	30	41	8	3	11	3	1.22525	-2.18415	0.0268637	Heavy metal transport/detoxification superfamily protein
AT5G57880.1	AT5G57880	79	44	71	47	154	94	118	130	3.89523	0.941254	0.0268637	multipolar spindle 1
AT4G12030.2	AT4G12030	60	75	85	123	34	44	57	46	3.62973	-1.02689	0.0269181	bile acid transporter 5
AT4G25940.1	AT4G25940	20	12	12	15	27	49	49	18	3.98848	1.15383	0.0271405	ENTH/ANTH/VHS superfamily protein
AT2G44980.1	AT2G44980	29	25	27	26	9	19	6	2	1.41777	-1.70255	0.0273451	SNF2 domain-containing protein / helicase domain-containing protein
AT1G72645.1	AT1G72645	220	135	160	172	306	329	234	340	5.25788	0.682772	0.0276373	unknown protein
AT4G11320.1	AT4G11320	1243	1469	2391	2388	1612	1259	977	1288	6.57831	-0.641347	0.0276373	Papain family cysteine protease
AT5G44350.1	AT5G44350	45	62	59	51	4	20	10	26	1.33172	-2.01109	0.0280895	ethylene-responsive nuclear protein -related
AT4G27450.1	AT4G27450	792	649	217	418	241	179	238	202	5.41223	-1.42128	0.0282037	Aluminium induced protein with YGL and LRDR motifs
AT1G53170.1	AT1G53170	59	23	46	41	97	115	68	87	3.46571	0.993724	0.0285677	ethylene response factor 8
AT4G21800.1	AT4G21800	459	507	593	435	571	968	789	764	5.89894	0.508161	0.0285677	P-loop containing nucleoside triphosphate hydrolases superfamily protein
AT3G26330.1	AT3G26330	8	13	21	7	2	0	0	3	-0.39457	-3.26603	0.0290188	cytochrome P450, family 71, subfamily B, polypeptide 37
AT3G14270.1	AT3G14270	475	352	409	324	350	301	201	291	5.52932	-0.576211	0.030031	phosphatidylinositol-4-phosphate 5-kinase family protein
AT5G25890.1	AT5G25890	1595	1577	2030	2044	2251	3200	2619	2814	7.4667	0.46765	0.0305501	indole-3-acetic acid inducible 28
AT5G53250.1	AT5G53250	2	3	2	2	23	4	6	11	3.00546	2.12783	0.0306412	arabinogalactan protein 22
AT1G44542.1	AT1G44542	850	876	1440	1142	427	566	450	624	5.05778	-1.16934	0.0310063	Cyclase family protein
AT1G67100.1	AT1G67100	88	64	34	25	4	6	4	13	1.05389	-3.13085	0.0310063	LOB domain-containing protein 40
AT2G30040.1	AT2G30040	58	48	100	64	12	46	27	35	2.89614	-1.28662	0.0315759	mitogen-activated protein kinase kinase kinase 14
AT5G50950.3	AT5G50950	201	168	218	190	130	158	59	70	5.2232	-1.03205	0.0326232	FUMARASE 2
AT5G52640.1	AT5G52640	125	125	133	94	57	74	58	65	4.33714	-1.03729	0.032672	heat shock protein 90.1
AT5G40780.1	AT5G40780	18	18	28	33	65	66	44	57	4.28665	1.14038	0.0329603	lysine histidine transporter 1
AT4G37760.1	AT4G37760	261	238	279	299	159	226	146	219	5.16624	-0.655903	0.0335529	squalene epoxidase 3
AT1G49940.2	AT1G49940	0	0	0	0	7	1	3	7	-1.18427	5.17033	0.0339053	unknown protein
AT5G52310.1	AT5G52310	42	25	67	56	49	167	218	47	5.47041	1.2721	0.0339819	low-temperature-responsive protein 78 (LTI78) / desiccation-responsive protein 29A (RD29A)
AT3G19400.1	AT3G19400	109	100	121	117	72	77	65	68	3.43797	-0.781617	0.0343277	Cysteine proteinases superfamily protein
AT5G14380.1	AT5G14380	81	55	56	27	173	191	95	124	2.74116	1.26496	0.0347062	arabinogalactan protein 6
AT2G03120.1	AT2G03120	641	548	736	640	483	618	439	536	5.77143	-0.427919	0.0348027	signal peptide peptidase
AT5G54400.1	AT5G54400	576	682	739	929	511	564	448	537	4.93853	-0.628629	0.0348027	S-adenosyl-L-methionine-dependent methyltransferases superfamily protein
AT1G29510.1	AT1G29510	230	224	231	188	152	73	125	70	3.3862	-1.14291	0.0350564	SAUR-like auxin-responsive protein family
AT1G67900.1	AT1G67900	179	167	250	163	73	140	131	94	4.29029	-0.90015	0.0352966	Phototropic-responsive NPH3 family protein
AT4G11070.1	AT4G11070	0	5	4	4	0	0	0	0	2.02963	-4.81485	0.0352966	WRKY family transcription factor
AT3G17998.1	AT3G17998	1021	909	1182	1336	821	979	675	900	6.57216	-0.522184	0.036036	conserved peptide upstream open reading frame 30
AT3G18000.1	AT3G18000	1021	909	1182	1336	821	979	675	900	6.57216	-0.522184	0.036036	S-adenosyl-L-methionine-dependent methyltransferases superfamily protein
AT5G16970.1	AT5G16970	231	233	264	190	259	384	378	478	6.41175	0.581638	0.0371089	alkenal reductase
AT1G69490.1	AT1G69490	154	113	88	68	250	271	624	354	6.01632	1.71963	0.0373729	NAC-like, activated by AP3/PI
AT3G10120.1	AT3G10120	61	79	105	67	130	166	125	150	3.802	0.753861	0.0384314	unknown protein
AT4G36090.2	AT4G36090	12	7	24	11	3	6	6	1	1.95091	-1.80662	0.0384314	oxidoreductase, 2OG-Fe(II) oxygenase family protein
AT3G26520.1	AT3G26520	21489	14632	15614	17274	13865	13815	11277	15264	11.6925	-0.47982	0.0387211	tonoplast intrinsic protein 2
AT5G54800.1	AT5G54800	396	363	489	484	248	406	163	355	4.90092	-0.708198	0.0387416	glucose 6-phosphate/phosphate translocator 1
AT5G66630.1	AT5G66630	22	18	15	10	31	59	41	48	2.16412	1.30923	0.0393201	DA1-related protein 5
AT5G45550.1	AT5G45550	67	33	64	44	32	26	23	18	3.34541	-1.16789	0.0408348	Mob1/phocein family protein
AT1G02400.1	AT1G02400	13	23	6	4	3	1	2	0	0.759938	-2.98854	0.0414633	gibberellin 2-oxidase 6
AT3G01530.1	AT3G01530	306	230	362	344	87	94	63	92	3.09551	-2.00196	0.0417479	myb domain protein 57
AT2G39250.1	AT2G39250	5	5	1	0	0	0	0	0	3.59238	-4.59127	0.0418193	Integrase-type DNA-binding superfamily protein
AT4G18580.1	AT4G18580	220	130	153	170	112	79	136	126	4.8171	-0.677123	0.0418193	unknown protein
AT5G57785.1	AT5G57785	84	104	148	93	136	159	242	174	5.93013	0.638227	0.0418193	unknown protein
AT4G37790.1	AT4G37790	217	200	247	193	139	190	142	148	4.97961	-0.59251	0.0428145	Homeobox-leucine zipper protein family
AT2G38500.1	AT2G38500	0	0	0	0	8	1	12	1	0.0134556	5.52522	0.0430977	2-oxoglutarate (2OG) and Fe(II)-dependent oxygenase superfamily protein
AT4G17800.1	AT4G17800	1	8	9	7	0	2	0	1	-0.164917	-2.9844	0.043281	Predicted AT-hook DNA-binding family protein
AT3G62550.1	AT3G62550	1000	953	1057	941	1664	1736	1561	1538	6.80518	0.599543	0.0433777	Adenine nucleotide alpha hydrolases-like superfamily protein
AT4G28775.1	AT4G28775	22	30	27	38	7	12	0	0	0.0021795	-2.76204	0.0434554	unknown protein
AT4G36670.1	AT4G36670	45	40	60	43	17	15	16	8	2.03449	-1.82988	0.0435449	Major facilitator superfamily protein
AT2G14750.1	AT2G14750	163	135	167	213	152	99	76	126	4.46368	-0.697522	0.0439442	APS kinase
AT5G40960.1	AT5G40960	55	60	61	61	84	101	137	177	4.07686	0.952869	0.0443598	Protein of unknown function (DUF 3339)
AT2G47130.1	AT2G47130	20	10	26	16	29	70	39	38	2.53211	1.16259	0.0448551	NAD(P)-binding Rossmann-fold superfamily protein
AT2G42380.2	AT2G42380	52	40	60	32	27	26	2	25	3.50867	-1.33738	0.0451723	Basic-leucine zipper (bZIP) transcription factor family protein
AT4G38840.1	AT4G38840	247	168	219	188	165	178	66	139	5.69662	-0.724176	0.0455876	SAUR-like auxin-responsive protein family
AT1G12090.1	AT1G12090	8867	6322	7741	8670	6438	7494	4413	6197	10.7783	-0.498791	0.0456906	extensin-like protein
AT1G33960.1	AT1G33960	6	4	4	11	0	0	0	0	3.61153	-5.74075	0.0457065	P-loop containing nucleoside triphosphate hydrolases superfamily protein
AT5G43260.1	AT5G43260	183	149	159	114	250	267	224	225	5.34694	0.550393	0.0457697	chaperone protein dnaJ-related
AT5G62990.1	AT5G62990	46	57	66	48	71	94	116	115	3.14559	0.754939	0.045936	Ubiquitin carboxyl-terminal hydrolase family protein
AT3G47650.1	AT3G47650	2151	1912	2337	2100	2861	3015	2972	3329	8.52806	0.403358	0.046311	DnaJ/Hsp40 cysteine-rich domain superfamily protein
AT4G29905.1	AT4G29905	114	57	27	60	11	33	46	28	6.6531	-1.27026	0.046311	unknown protein
AT5G56795.1	AT5G56795	1157	960	1065	1076	780	974	925	763	7.12011	-0.425822	0.046311	metallothionein 1B
AT2G41260.2	AT2G41260	114	104	309	64	62	10	8	21	2.21771	-2.57579	0.0463201	glycine-rich protein / late embryogenesis abundant protein (M17)
AT4G36920.2	AT4G36920	204	154	283	202	156	114	159	114	3.99914	-0.714129	0.0463201	Integrase-type DNA-binding superfamily protein
AT1G15260.1	AT1G15260	39	45	40	38	82	97	88	59	3.70819	0.886631	0.0465379	unknown protein
AT3G02310.1	AT3G02310	947	888	1059	916	833	817	707	663	6.10421	-0.44928	0.0466108	K-box region and MADS-box transcription factor family protein
AT5G67340.1	AT5G67340	1	1	2	1	3	8	5	22	0.953682	2.67067	0.0467258	ARM repeat superfamily protein
AT2G07688.1	AT2G07688	159	225	211	224	108	144	159	140	3.91848	-0.690506	0.0469343	pseudogene
AT5G35111.1	AT5G35111	125	66	103	88	10	47	36	25	2.87898	-1.82148	0.0471587	pseudogene
AT3G26450.1	AT3G26450	168	134	182	132	243	229	203	314	5.70271	0.563807	0.0472336	Polyketide cyclase/dehydrase and lipid transport superfamily protein
AT4G37295.1	AT4G37295	8	26	13	10	1	4	0	6	0.680751	-2.51277	0.0479583	unknown protein
AT5G55450.1	AT5G55450	160	176	206	71	288	352	307	258	5.94085	0.857943	0.0479583	Bifunctional inhibitor/lipid-transfer protein/seed storage 2S albumin superfamily protein
AT2G16200.1	AT2G16200	4	7	10	17	2	1	0	0	-0.141784	-3.55615	0.0488826	structural molecules
AT4G34760.1	AT4G34760	161	145	218	107	113	79	73	81	4.34254	-0.965241	0.0493732	SAUR-like auxin-responsive protein family
AT2G07795.1	AT2G07795	2	7	3	2	0	0	0	0	-1.09864	-4.94399	0.0504077	unknown protein
AT1G64090.1	AT1G64090	578	520	655	576	454	505	338	550	5.82345	-0.462467	0.0506812	Reticulan like protein B3
AT2G41140.1	AT2G41140	888	700	909	991	617	786	622	639	6.33048	-0.508909	0.0509933	CDPK-related kinase 1
AT2G39980.1	AT2G39980	364	267	436	492	604	915	717	744	5.68937	0.820492	0.0515437	HXXXD-type acyl-transferase family protein
AT2G21170.2	AT2G21170	8523	8079	10231	9150	7744	9019	7230	8029	9.89658	-0.286638	0.0519612	triosephosphate isomerase
AT4G30940.1	AT4G30940	90	98	103	110	35	85	49	59	3.0028	-0.956908	0.0519612	BTB/POZ domain with WD40/YVTN repeat-like protein
AT4G31380.1	AT4G31380	21	13	23	10	38	65	72	23	2.60585	1.46508	0.0519612	FPF1-like protein 1
AT5G48290.1	AT5G48290	0	0	1	0	8	12	7	1	0.296823	4.17316	0.0519612	Heavy metal transport/detoxification superfamily protein
AT3G53850.1	AT3G53850	318	256	309	292	395	450	494	488	5.16738	0.52268	0.0524894	Uncharacterised protein family (UPF0497)
AT3G48550.1	AT3G48550	121	101	187	135	89	102	72	85	3.30003	-0.749652	0.0530299	unknown protein
AT1G15100.1	AT1G15100	207	251	254	304	129	192	166	205	5.4168	-0.682981	0.0530625	RING-H2 finger A2A
AT1G18140.1	AT1G18140	3	2	3	1	12	11	4	18	0.589506	2.12866	0.0530625	laccase 1
AT5G14360.1	AT5G14360	72	47	77	59	25	28	23	25	2.44361	-1.44285	0.0530625	Ubiquitin-like superfamily protein
AT5G25220.2	AT5G25220	1487	1359	1311	1071	1635	2298	2083	2130	7.67139	0.507195	0.0535176	KNOTTED1-like homeobox gene 3
AT1G13710.1	AT1G13710	0	4	10	7	0	2	0	0	3.13486	-3.19506	0.0537168	cytochrome P450, family 78, subfamily A, polypeptide 5
AT3G24140.1	AT3G24140	138	108	177	153	88	141	88	68	4.38134	-0.696871	0.0537168	basic helix-loop-helix (bHLH) DNA-binding superfamily protein
AT1G79840.1	AT1G79840	0	10	2	2	29	14	18	18	1.76876	2.31687	0.0548325	HD-ZIP IV family of homeobox-leucine zipper protein with lipid-binding START domain
AT4G15415.1	AT4G15415	147	171	139	134	218	297	240	229	4.31754	0.599819	0.0549289	Protein phosphatase 2A regulatory B subunit family protein
AT2G16890.2	AT2G16890	217	237	462	337	187	219	194	181	4.66366	-0.771035	0.0550426	UDP-Glycosyltransferase superfamily protein
AT5G57520.1	AT5G57520	59	41	63	49	99	115	108	94	3.90397	0.862639	0.0551488	zinc finger protein 2
AT5G58840.1	AT5G58840	1	8	12	4	0	0	0	0	-0.868187	-5.70603	0.0555602	Subtilase family protein
AT1G15690.2	AT1G15690	2656	2516	3013	2751	3438	4188	3184	4326	8.65266	0.341913	0.0565797	Inorganic H pyrophosphatase family protein
AT4G08230.1	AT4G08230	714	631	704	675	557	649	492	490	6.17131	-0.440977	0.056793	glycine-rich protein
AT3G55880.2	AT3G55880	13	35	29	13	13	4	10	6	2.09861	-1.5344	0.0572044	Alpha/beta hydrolase related protein
AT3G09480.1	AT3G09480	28	31	29	20	10	2	10	7	1.56921	-1.97071	0.0578286	Histone superfamily protein
AT1G01140.3	AT1G01140	237	207	315	216	290	409	387	393	4.97026	0.491049	0.0583651	CBL-interacting protein kinase 9
AT2G41290.1	AT2G41290	151	169	205	183	141	148	95	74	3.82877	-0.744019	0.0591664	strictosidine synthase-like 2
AT2G27660.1	AT2G27660	7	14	6	4	0	0	4	2	2.61205	-2.40311	0.0595279	Cysteine/Histidine-rich C1 domain family protein
AT4G33565.1	AT4G33565	101	105	161	118	82	76	78	75	4.01689	-0.739702	0.0598651	RING/U-box superfamily protein
AT1G11840.1	AT1G11840	3256	3111	4568	3720	2945	3352	2429	3346	8.18821	-0.395744	0.06018	glyoxalase I homolog
AT2G26750.1	AT2G26750	349	220	296	334	221	199	203	176	4.75906	-0.693375	0.06018	alpha/beta-Hydrolases superfamily protein
AT1G13260.1	AT1G13260	237	162	221	172	235	443	414	313	5.59433	0.708941	0.060465	related to ABI3/VP1 1
AT1G02390.1	AT1G02390	15	0	0	3	0	0	0	0	0.868968	-5.30937	0.0618759	glycerol-3-phosphate acyltransferase 2
AT3G22970.2	AT3G22970	406	318	306	340	414	603	542	616	5.95317	0.531903	0.0626213	Protein of unknown function (DUF506)
AT4G00680.1	AT4G00680	7	11	16	12	2	2	0	2	0.270285	-2.95836	0.0638419	actin depolymerizing factor 8
AT2G40080.1	AT2G40080	225	147	139	143	129	84	69	85	4.8242	-0.959618	0.063923	Protein of unknown function (DUF1313)
AT1G69410.1	AT1G69410	701	716	861	818	558	834	517	628	6.01017	-0.418524	0.0655202	eukaryotic elongation factor 5A-3
AT1G76955.1	AT1G76955	38	43	40	19	75	63	73	62	3.96717	0.847069	0.0655202	Expressed protein
AT1G74740.1	AT1G74740	225	144	232	178	121	158	113	165	4.56636	-0.605525	0.0657853	calcium-dependent protein kinase 30
AT3G04700.1	AT3G04700	279	178	176	105	447	363	341	295	4.05457	0.846353	0.066469	Protein of unknown function (DUF1685)
AT1G71050.1	AT1G71050	149	123	176	165	79	112	72	123	3.09464	-0.794942	0.0666642	Heavy metal transport/detoxification superfamily protein
AT4G19160.1	AT4G19160	1536	1660	2183	1968	2115	2728	2482	2875	7.70247	0.358881	0.0668744	unknown protein
AT1G17345.1	AT1G17345	0	6	4	9	1	0	0	0	-0.627618	-3.79823	0.0677568	SAUR-like auxin-responsive protein family
AT5G48900.1	AT5G48900	309	280	400	322	199	292	198	255	4.26889	-0.59679	0.0679534	Pectin lyase-like superfamily protein
AT5G50160.1	AT5G50160	330	343	381	404	547	579	534	521	5.95063	0.464807	0.0681996	ferric reduction oxidase 8
AT1G22690.1	AT1G22690	41	26	33	44	21	41	10	5	3.88084	-1.04231	0.0683423	Gibberellin-regulated family protein
AT3G50810.1	AT3G50810	320	373	499	336	273	289	201	344	5.09058	-0.585789	0.0683423	Uncharacterised protein family (UPF0497)
AT3G22968.1	AT3G22968	408	318	311	341	414	603	542	617	5.95503	0.524719	0.0684933	conserved peptide upstream open reading frame 59
AT2G40120.1	AT2G40120	339	349	393	333	181	257	192	220	5.40036	-0.863167	0.068636	Protein kinase superfamily protein
AT3G28220.1	AT3G28220	234	169	289	373	159	127	132	171	4.48721	-0.95344	0.0689762	TRAF-like family protein
AT4G17245.1	AT4G17245	67	51	61	72	127	110	88	125	4.39433	0.719903	0.0711108	RING/U-box superfamily protein
AT4G27652.1	AT4G27652	45	17	43	24	71	43	91	102	2.91049	1.16558	0.0711108	unknown protein
AT5G25280.1	AT5G25280	2125	1808	1671	1756	1272	1719	1386	1537	7.97504	-0.453584	0.0714402	serine-rich protein-related
AT3G22240.1	AT3G22240	810	733	780	735	505	672	402	476	7.70676	-0.7114	0.0724532	unknown protein
AT4G36570.1	AT4G36570	421	426	436	495	261	306	190	333	4.27865	-0.845641	0.0724532	RAD-like 3
AT4G02075.1	AT4G02075	48	74	56	75	36	22	39	18	3.24235	-1.23366	0.0736941	RING/FYVE/PHD zinc finger superfamily protein
AT1G18270.1	AT1G18270	193	208	216	250	265	341	293	509	4.80379	0.565343	0.0737692	ketose-bisphosphate aldolase class-II family protein
AT2G24160.1	AT2G24160	13	2	6	2	15	21	22	20	2.04354	1.62535	0.0737692	pseudogene
AT1G68238.1	AT1G68238	50	82	31	55	23	26	30	20	4.39046	-1.28226	0.0753965	unknown protein
AT1G77570.1	AT1G77570	0	5	4	1	18	13	14	19	0.270465	2.509	0.0753965	Winged helix-turn-helix transcription repressor DNA-binding
AT5G41790.1	AT5G41790	3469	3162	3371	3335	2166	3060	2858	2827	9.03384	-0.414923	0.0753965	COP1-interactive protein 1
AT3G12915.1	AT3G12915	3	3	1	4	6	8	10	27	0.357606	2.02054	0.0755389	Ribosomal protein S5/Elongation factor G/III/V family protein
AT5G54470.1	AT5G54470	79	41	63	112	14	22	45	40	2.77633	-1.37974	0.0760145	B-box type zinc finger family protein
AT1G18000.1	AT1G18000	159	112	184	139	194	213	217	265	5.00997	0.471731	0.0761865	Major facilitator superfamily protein
AT1G68060.1	AT1G68060	622	838	953	756	631	697	616	598	6.21326	-0.432342	0.0764674	microtubule-associated proteins 70-1
AT2G41940.1	AT2G41940	13	21	16	5	43	22	34	29	3.70987	1.10362	0.0765665	zinc finger protein 8
AT4G36220.1	AT4G36220	251	228	281	262	193	229	142	125	5.38344	-0.691284	0.0765665	ferulic acid 5-hydroxylase 1
AT3G17020.1	AT3G17020	2895	2663	3369	2843	2362	2728	2366	2569	8.14155	-0.348359	0.0769085	Adenine nucleotide alpha hydrolases-like superfamily protein
ATCG00490.1	ATCG00490	5	0	0	2	21	6	16	5	1.92414	2.61591	0.0771668	ribulose-bisphosphate carboxylases
AT5G64780.1	AT5G64780	7	13	13	8	2	5	0	3	0.700689	-2.12942	0.0773179	Uncharacterised conserved protein UCP009193
AT3G46540.1	AT3G46540	160	122	200	127	215	273	275	226	4.95063	0.597069	0.0780613	ENTH/VHS family protein
AT3G62150.1	AT3G62150	133	152	198	133	58	161	45	60	3.75473	-1.08435	0.0782267	P-glycoprotein 21
AT5G59320.1	AT5G59320	2612	3015	5865	2606	5980	6941	5311	6133	8.46836	0.697429	0.0783573	lipid transfer protein 3
AT2G40100.1	AT2G40100	522	490	539	524	715	758	626	922	6.32576	0.41393	0.0785119	light harvesting complex photosystem II
AT2G38695.1	AT2G38695	64	55	76	94	151	115	107	126	3.3691	0.679605	0.0790849	unknown protein
AT3G46300.1	AT3G46300	45	36	33	27	14	12	12	20	1.52326	-1.40863	0.079161	unknown protein
AT2G31070.1	AT2G31070	210	184	177	177	253	343	292	362	4.96083	0.605525	0.0792363	TCP domain protein 10
AT4G35060.1	AT4G35060	109	89	104	82	80	32	64	14	4.57768	-1.08564	0.079476	Heavy metal transport/detoxification superfamily protein
AT5G66090.1	AT5G66090	283	297	329	297	455	543	348	429	5.54939	0.428119	0.0803908	unknown protein
AT1G12230.1	AT1G12230	1379	1182	1272	1363	1105	1192	955	1109	6.64836	-0.379361	0.0812314	Aldolase superfamily protein
AT1G19540.1	AT1G19540	93	109	130	131	46	56	87	55	2.85566	-1.01728	0.081427	NmrA-like negative transcriptional regulator family protein
AT5G49820.1	AT5G49820	207	226	263	183	155	194	135	159	4.44505	-0.576635	0.0816469	Protein of unknown function, DUF647
AT5G27280.1	AT5G27280	159	159	175	145	132	164	82	103	5.05519	-0.54087	0.0823571	Zim17-type zinc finger protein
AT1G17290.1	AT1G17290	316	266	311	319	244	187	233	248	5.10394	-0.519052	0.0827314	alanine aminotransferas
AT1G31710.1	AT1G31710	13	0	0	3	1	1	0	0	3.32953	-2.84339	0.0842148	Copper amine oxidase family protein
AT5G65207.1	AT5G65207	3530	2560	1711	2218	1693	1871	1438	2011	7.63657	-0.670205	0.0842148	unknown protein
AT5G46490.2	AT5G46490	4	0	0	12	0	0	0	0	1.30979	-5.11144	0.0845326	Disease resistance protein (TIR-NBS-LRR class) family
AT2G30720.1	AT2G30720	41	25	56	39	13	20	17	13	2.05804	-1.44438	0.0854929	Thioesterase/thiol ester dehydrase-isomerase superfamily protein
AT1G60390.1	AT1G60390	214	261	409	256	219	221	194	159	4.80601	-0.618637	0.0855553	polygalacturonase 1
AT4G02520.1	AT4G02520	126	124	56	93	159	101	404	259	7.51215	1.10172	0.0855553	glutathione S-transferase PHI 2
AT2G18370.1	AT2G18370	0	0	8	8	0	0	0	0	-0.542896	-5.04023	0.0856365	Bifunctional inhibitor/lipid-transfer protein/seed storage 2S albumin superfamily protein
AT1G04570.1	AT1G04570	16	11	20	0	0	4	0	0	-0.189726	-3.56228	0.0857948	Major facilitator superfamily protein
AT3G02580.1	AT3G02580	781	729	943	876	778	779	531	676	6.46234	-0.387864	0.0859087	sterol 1
AT5G58360.1	AT5G58360	12	3	1	6	0	0	0	0	-0.0994398	-5.59188	0.0867052	ovate family protein 3
AT2G34430.1	AT2G34430	1463	981	1364	1375	1029	922	976	1057	9.28629	-0.487912	0.0870508	light-harvesting chlorophyll-protein complex II subunit B1
AT4G36950.1	AT4G36950	0	0	0	2	4	8	14	0	2.01271	3.34567	0.0871397	mitogen-activated protein kinase kinase kinase 21
AT5G15810.1	AT5G15810	102	108	159	149	220	255	231	242	4.02646	0.765134	0.0871397	N2,N2-dimethylguanosine tRNA methyltransferase
AT1G47240.1	AT1G47240	80	53	63	58	30	52	28	31	2.2771	-0.986407	0.0882915	NRAMP metal ion transporter 2
AT3G08860.1	AT3G08860	0	9	1	1	0	0	0	0	1.84572	-4.62419	0.0882915	PYRIMIDINE 4
AT5G35590.1	AT5G35590	360	365	435	386	312	349	284	346	5.32253	-0.380911	0.0882915	proteasome alpha subunit A1
AT5G39050.1	AT5G39050	475	546	811	720	395	376	405	386	5.67462	-0.802377	0.0882915	HXXXD-type acyl-transferase family protein
AT2G15880.1	AT2G15880	3	5	8	5	32	11	14	17	2.57569	1.70964	0.0883281	Leucine-rich repeat (LRR) family protein
ATMG00510.1	ATMG00510	18	6	8	9	1	0	1	4	-0.51983	-2.80341	0.0883281	NADH dehydrogenase subunit 7
AT1G75050.1	AT1G75050	0	9	13	9	0	0	0	0	-1.20752	-6.01083	0.0886323	Pathogenesis-related thaumatin superfamily protein
AT2G47180.1	AT2G47180	33	34	82	75	17	33	12	45	3.00209	-1.18393	0.0886323	galactinol synthase 1
AT5G38280.1	AT5G38280	2	0	2	1	15	12	11	1	0.129765	2.77348	0.0886539	PR5-like receptor kinase
AT1G71690.1	AT1G71690	30	24	31	18	67	46	83	59	3.35631	1.21507	0.0886912	Protein of unknown function (DUF579)
AT3G22910.1	AT3G22910	43	45	25	23	9	0	1	17	1.66876	-2.47571	0.0910484	ATPase E1-E2 type family protein / haloacid dehalogenase-like hydrolase family protein
AT5G46330.1	AT5G46330	161	119	145	221	273	390	220	365	4.49616	0.809893	0.0911993	Leucine-rich receptor-like protein kinase family protein
AT4G35010.1	AT4G35010	48	15	15	3	87	74	66	62	1.59473	1.69084	0.0912651	beta-galactosidase 11
AT4G29060.1	AT4G29060	7332	6525	6997	7023	8502	10131	8634	11324	10.0452	0.339116	0.0918871	elongation factor Ts family protein
AT1G18390.2	AT1G18390	0	0	0	0	5	3	4	0	0.891858	4.61041	0.0934841	Protein kinase superfamily protein
AT2G18050.1	AT2G18050	167	180	138	97	164	313	249	428	5.81994	0.827592	0.0934841	histone H1-3
AT2G25220.1	AT2G25220	18	25	20	14	6	20	0	5	2.31304	-1.47883	0.0934962	Protein kinase superfamily protein
AT3G50770.1	AT3G50770	43	36	44	35	103	65	152	94	4.2323	1.30795	0.0952064	calmodulin-like 41
AT1G24140.1	AT1G24140	4	9	0	0	0	0	0	0	0.848917	-4.8898	0.0954244	Matrixin family protein
AT2G04790.1	AT2G04790	52	34	61	58	96	85	80	90	3.43926	0.668868	0.0954244	unknown protein
AT5G20720.2	AT5G20720	1505	1299	1725	1570	2019	2233	1830	2200	7.77553	0.323939	0.0954244	chaperonin 20
AT1G04420.1	AT1G04420	114	103	118	94	180	149	171	174	5.11568	0.540299	0.0955279	NAD(P)-linked oxidoreductase superfamily protein
AT1G03106.1	AT1G03106	8	3	12	11	23	21	33	33	1.90622	1.60014	0.0959967	unknown protein
AT3G22235.1	AT3G22235	735	592	645	613	447	548	342	423	7.99206	-0.690856	0.0959967	unknown protein
AT3G17860.1	AT3G17860	120	152	153	142	82	105	100	81	3.77551	-0.74202	0.0960489	jasmonate-zim-domain protein 3
AT5G43060.1	AT5G43060	292	291	420	263	227	281	202	247	4.81675	-0.519915	0.0960489	Granulin repeat cysteine protease family protein
AT5G28640.1	AT5G28640	430	514	594	589	323	376	317	383	5.08443	-0.724318	0.0961288	SSXT family protein
AT4G36850.1	AT4G36850	87	60	24	54	92	165	178	352	3.7905	1.62664	0.0962296	PQ-loop repeat family protein / transmembrane family protein
AT2G22770.1	AT2G22770	0	4	0	0	14	6	8	5	0.84927	2.77826	0.0963019	basic helix-loop-helix (bHLH) DNA-binding superfamily protein
AT3G27220.1	AT3G27220	108	95	77	107	20	34	40	61	2.05141	-1.46013	0.0964401	Galactose oxidase/kelch repeat superfamily protein
AT4G13790.1	AT4G13790	6	13	21	8	4	0	0	1	-0.88894	-3.20761	0.0967434	SAUR-like auxin-responsive protein family
AT1G21530.1	AT1G21530	7	3	3	2	0	0	0	0	-1.59259	-5.03244	0.09791	AMP-dependent synthetase and ligase family protein
AT5G20050.1	AT5G20050	151	141	151	144	275	242	211	191	5.00865	0.530421	0.0979872	Protein kinase superfamily protein
AT5G66052.1	AT5G66052	0	0	0	0	1	10	0	0	6.63337	4.46191	0.0979872	unknown protein
AT5G05060.1	AT5G05060	795	802	1085	869	707	796	611	712	5.99144	-0.444765	0.097994	Cystatin/monellin superfamily protein
AT5G55850.3	AT5G55850	1084	958	1142	1017	739	1094	756	958	7.37258	-0.376483	0.0980714	RPM1-interacting protein 4 (RIN4) family protein
AT1G26450.1	AT1G26450	83	61	131	84	137	170	148	191	3.06843	0.745569	0.0981128	Carbohydrate-binding X8 domain superfamily protein
AT1G31580.1	AT1G31580	290	248	208	123	113	107	184	186	9.23347	-0.68182	0.0981128	ECS1
AT4G02640.1	AT4G02640	95	93	100	56	31	70	52	60	3.01797	-0.827856	0.0981128	bZIP transcription factor family protein
AT1G10710.2	AT1G10710	8	1	3	2	0	0	0	0	-1.19781	-4.92457	0.098724	poor homologous synapsis 1
AT1G49500.1	AT1G49500	200	128	26	108	50	45	50	33	6.32579	-1.53143	0.098724	unknown protein
AT5G28030.2	AT5G28030	80	83	26	49	152	92	125	153	3.72845	0.981639	0.098724	L-cysteine desulfhydrase 1
AT3G05980.1	AT3G05980	47	56	54	28	31	17	20	22	2.08858	-1.14957	0.0996252	unknown protein
AT4G29300.1	AT4G29300	3	2	8	9	1	0	0	0	-0.846399	-3.9622	0.0996252	low-molecular-weight cysteine-rich 27
AT3G27460.2	AT3G27460	59	72	71	103	52	47	30	56	2.98008	-0.849663	0.100294	SGF29 tudor-like domain
AT5G25250.1	AT5G25250	0	0	0	0	0	0	4	7	3.71141	4.47332	0.101655	SPFH/Band 7/PHB domain-containing membrane-associated protein family
AT3G05936.1	AT3G05936	1	4	1	0	3	18	12	5	1.29596	2.41706	0.101804	unknown protein
AT1G77770.2	AT1G77770	125	144	258	152	104	159	118	120	4.57117	-0.543024	0.101878	Protein of unknown function (DUF1644)
AT1G80730.1	AT1G80730	8	14	12	7	0	0	3	0	-0.599637	-3.63379	0.10259	zinc-finger protein 1
AT3G05690.1	AT3G05690	33	26	58	28	49	102	63	122	2.94209	1.08998	0.10259	nuclear factor Y, subunit A2
AT1G45165.1	AT1G45165	3	0	4	0	4	9	14	14	2.60749	2.38782	0.102643	Expressed protein
AT1G27590.1	AT1G27590	46	43	39	34	30	14	7	3	1.61372	-1.68998	0.102929	unknown protein
AT1G62360.1	AT1G62360	796	947	1416	1140	645	823	695	822	5.8012	-0.634198	0.103041	KNOX/ELK homeobox transcription factor
AT4G37240.1	AT4G37240	341	250	341	347	255	249	136	207	4.91219	-0.720158	0.103041	unknown protein
AT4G29690.1	AT4G29690	0	1	0	0	7	12	4	5	-0.920675	4.10218	0.103117	Alkaline-phosphatase-like family protein
AT2G33060.1	AT2G33060	6	7	9	0	29	19	30	6	2.03679	1.83759	0.104794	receptor like protein 27
AT3G53720.1	AT3G53720	126	105	166	135	65	70	51	130	3.73823	-0.874955	0.104873	cation/H+ exchanger 20
AT3G44560.1	AT3G44560	9	11	9	19	0	0	0	5	0.697324	-3.29735	0.10491	fatty acid reductase 8
AT4G37880.1	AT4G37880	278	249	315	278	224	248	240	141	5.02721	-0.498653	0.105812	LisH/CRA/RING-U-box domains-containing protein
AT2G21750.1	AT2G21750	15	10	28	11	6	0	0	2	-0.602039	-2.97928	0.106964	Protein of unknown function (DUF1278)
AT1G23090.1	AT1G23090	734	777	618	641	966	1419	1118	1333	6.45386	0.657603	0.106975	sulfate transporter 91
AT4G17940.1	AT4G17940	3521	2944	3575	2778	2319	3058	2762	2614	8.24972	-0.373146	0.107032	Tetratricopeptide repeat (TPR)-like superfamily protein
AT3G20080.2	AT3G20080	118	86	87	84	135	198	125	185	4.65961	0.633959	0.107212	cytochrome P450, family 705, subfamily A, polypeptide 15
AT1G61160.1	AT1G61160	3	4	4	2	10	24	7	27	-0.416258	2.1796	0.108691	unknown protein
AT1G07040.1	AT1G07040	106	73	91	77	139	146	108	180	4.17011	0.593845	0.108858	unknown protein
AT4G18290.1	AT4G18290	23	9	33	26	16	0	4	1	1.69805	-2.11644	0.109373	potassium channel in Arabidopsis thaliana 2
AT4G12730.1	AT4G12730	1050	741	1238	982	914	897	647	782	7.67712	-0.417424	0.109605	FASCICLIN-like arabinogalactan 2
AT4G15610.1	AT4G15610	22	3	3	1	5	1	0	0	4.19257	-2.31542	0.109755	Uncharacterised protein family (UPF0497)
AT4G15750.1	AT4G15750	22	29	18	21	67	91	46	76	5.11405	1.47008	0.109755	Plant invertase/pectin methylesterase inhibitor superfamily protein
AT5G60890.1	AT5G60890	0	1	0	3	6	0	13	4	2.70344	2.31702	0.110326	myb domain protein 34
AT4G00900.1	AT4G00900	145	219	209	162	101	146	82	112	3.57809	-0.87827	0.111571	ER-type Ca2+-ATPase 2
AT5G05965.1	AT5G05965	9	15	5	3	0	0	0	2	-0.0688369	-3.88224	0.11172	unknown protein
AT3G19450.1	AT3G19450	279	268	268	320	399	433	404	514	7.17884	0.498054	0.112028	GroES-like zinc-binding alcohol dehydrogenase family protein
AT4G26460.1	AT4G26460	37	50	18	21	11	2	0	6	0.078952	-2.86176	0.112385	S-adenosyl-L-methionine-dependent methyltransferases superfamily protein
AT1G06470.2	AT1G06470	124	85	116	80	46	116	50	51	3.58619	-0.767293	0.112878	Nucleotide/sugar transporter family protein
AT1G10480.1	AT1G10480	9	10	19	6	0	0	0	3	-0.218637	-3.77879	0.112878	zinc finger protein 5
AT2G46630.1	AT2G46630	252	242	302	225	138	203	150	214	4.22916	-0.663231	0.113111	unknown protein
AT1G53282.1	AT1G53282	15	26	13	22	36	89	53	34	2.11613	1.31482	0.113532	Plant thionin family protein
AT1G01190.1	AT1G01190	12	11	0	13	3	0	2	5	1.35993	-1.94733	0.113805	cytochrome P450, family 78, subfamily A, polypeptide 8
AT1G09080.1	AT1G09080	55	41	22	21	14	16	3	12	2.63732	-1.80154	0.114124	Heat shock protein 70 (Hsp 70) family protein
AT1G14880.1	AT1G14880	17	9	13	5	4	24	85	24	5.61673	1.56851	0.114124	PLANT CADMIUM RESISTANCE 1
AT3G01700.1	AT3G01700	9	11	10	7	52	64	28	95	1.22726	2.51498	0.114124	arabinogalactan protein 11
AT1G23130.1	AT1G23130	0	10	0	3	3	12	2	30	7.80699	1.64079	0.114301	Polyketide cyclase/dehydrase and lipid transport superfamily protein
AT1G31180.1	AT1G31180	752	685	862	1004	648	673	605	652	6.57898	-0.471029	0.114414	isopropylmalate dehydrogenase 3
AT1G65960.2	AT1G65960	9885	9987	14678	12157	9633	11716	8599	9981	9.81386	-0.339273	0.114414	glutamate decarboxylase 2
AT2G33130.1	AT2G33130	10	8	5	12	0	0	3	0	-1.03538	-3.42291	0.114414	ralf-like 18
AT3G13700.1	AT3G13700	14	23	18	10	7	5	7	5	2.13887	-1.5381	0.114414	RNA-binding (RRM/RBD/RNP motifs) family protein
AT3G44200.1	AT3G44200	201	192	202	176	71	165	145	137	4.03367	-0.705922	0.114414	NIMA (never in mitosis, gene A)-related 6
AT4G11910.1	AT4G11910	3	3	5	8	12	19	26	15	1.42313	1.80271	0.114414	unknown protein
AT5G14120.1	AT5G14120	862	433	312	629	970	1256	879	959	7.77651	0.709316	0.114414	Major facilitator superfamily protein
AT4G11190.1	AT4G11190	0	0	0	10	0	0	0	0	3.54221	-4.4504	0.114915	Disease resistance-responsive (dirigent-like protein) family protein
ATCG00220.1	ATCG00220	1459	1178	1566	1310	1821	2208	2299	2480	8.94004	0.5629	0.115079	photosystem II reaction center protein M
AT1G77100.1	AT1G77100	1	3	11	3	0	0	0	0	-1.53153	-5.20698	0.116091	Peroxidase superfamily protein
AT3G01660.1	AT3G01660	95	56	82	56	114	116	110	174	3.85479	0.708246	0.116596	S-adenosyl-L-methionine-dependent methyltransferases superfamily protein
AT1G67770.1	AT1G67770	4	3	7	1	0	0	0	0	-1.52931	-4.99103	0.117325	terminal EAR1-like 2
AT2G24570.1	AT2G24570	264	181	193	200	175	145	140	112	4.83527	-0.666787	0.117467	WRKY DNA-binding protein 17
AT2G37750.1	AT2G37750	15	28	21	33	14	13	12	10	3.13371	-1.10074	0.119619	unknown protein
AT1G18670.1	AT1G18670	111	151	157	143	83	100	82	128	3.88968	-0.644187	0.119802	Protein kinase superfamily protein
AT3G04010.1	AT3G04010	28	14	18	34	0	0	6	19	1.4374	-2.02141	0.121178	O-Glycosyl hydrolases family 17 protein
AT1G03410.1	AT1G03410	41	36	78	56	78	147	91	65	4.58377	0.743247	0.121642	2-oxoglutarate (2OG) and Fe(II)-dependent oxygenase superfamily protein
AT3G43840.1	AT3G43840	26	17	15	21	0	16	9	4	1.39118	-1.58678	0.121642	3-oxo-5-alpha-steroid 4-dehydrogenase family protein
AT5G56650.1	AT5G56650	38	68	72	58	36	55	29	22	2.70455	-0.858703	0.12212	IAA-leucine resistant (ILR)-like 1
AT1G01550.2	AT1G01550	859	795	992	938	786	887	619	755	6.66646	-0.357087	0.123043	Protein of unknown function (DUF793)
AT5G52882.1	AT5G52882	1494	1346	1730	1745	1385	1707	1104	1142	7.02118	-0.365266	0.123136	P-loop containing nucleoside triphosphate hydrolases superfamily protein
AT5G38200.1	AT5G38200	25	11	25	26	3	17	0	2	1.67326	-2.13901	0.123523	Class I glutamine amidotransferase-like superfamily protein
AT1G28270.1	AT1G28270	94	38	57	5	215	174	116	124	2.6778	1.57006	0.123812	ralf-like 4
AT2G26695.1	AT2G26695	172	143	133	145	28	110	56	57	3.35621	-1.40483	0.124118	Ran BP2/NZF zinc finger-like superfamily protein
AT1G49270.1	AT1G49270	0	0	0	0	0	10	5	8	-1.43427	5.45444	0.124466	Protein kinase superfamily protein
AT3G46000.1	AT3G46000	806	604	926	798	578	726	592	727	6.30275	-0.372523	0.124466	actin depolymerizing factor 2
AT1G07610.1	AT1G07610	799	577	445	868	508	513	344	440	7.26749	-0.718178	0.125332	metallothionein 1C
AT4G34138.1	AT4G34138	1871	1927	1896	1876	1404	1600	1453	1590	7.26749	-0.450699	0.125615	UDP-glucosyl transferase 73B1
AT1G52340.1	AT1G52340	219	142	198	156	123	169	119	132	4.36629	-0.521951	0.12585	NAD(P)-binding Rossmann-fold superfamily protein
AT2G30933.2	AT2G30933	1	1	3	2	14	8	12	12	-0.43327	2.5599	0.126002	Carbohydrate-binding X8 domain superfamily protein
AT3G46640.1	AT3G46640	317	261	300	294	229	277	238	157	4.85305	-0.495986	0.126002	Homeodomain-like superfamily protein
AT4G26965.2	AT4G26965	93	101	97	75	67	65	58	46	3.27346	-0.75281	0.126002	NADH:ubiquinone oxidoreductase, 17.2kDa subunit
AT2G17787.1	AT2G17787	76	37	69	52	80	145	75	120	3.43987	0.708334	0.127156	unknown protein
AT4G18960.2	AT4G18960	237	232	302	301	198	209	119	262	3.9414	-0.574142	0.127583	K-box region and MADS-box transcription factor family protein
AT5G16750.1	AT5G16750	577	601	745	713	849	1059	794	1046	5.80287	0.384081	0.127952	Transducin family protein / WD-40 repeat family protein
AT5G43440.2	AT5G43440	13	15	0	3	0	3	0	4	2.17835	-2.29342	0.127952	2-oxoglutarate (2OG) and Fe(II)-dependent oxygenase superfamily protein
AT4G12830.1	AT4G12830	84	45	89	86	36	60	33	56	3.738	-0.84048	0.128144	alpha/beta-Hydrolases superfamily protein
AT3G52010.1	AT3G52010	0	0	2	0	16	2	6	12	-0.860615	3.84219	0.130371	serine carboxypeptidase-like 37
AT4G39610.1	AT4G39610	14	14	8	7	63	48	41	45	1.30687	2.0425	0.130831	Protein of unknown function, DUF617
AT4G28270.1	AT4G28270	168	130	161	166	85	106	122	124	4.30106	-0.630718	0.133244	RING membrane-anchor 2
AT4G28380.1	AT4G28380	5	12	2	6	0	1	0	1	-0.49819	-3.53949	0.133244	Leucine-rich repeat (LRR) family protein
AT5G34780.1	AT5G34780	10	2	0	4	6	11	29	23	1.35845	1.95318	0.133244	Thiamin diphosphate-binding fold (THDP-binding) superfamily protein
AT4G34410.1	AT4G34410	14	24	23	20	52	28	46	73	1.9292	1.18124	0.133537	redox responsive transcription factor 1
AT5G55960.1	AT5G55960	563	421	598	503	514	446	337	388	5.99404	-0.419799	0.133927	unknown protein
AT5G03680.1	AT5G03680	254	218	337	260	363	465	357	408	5.21728	0.461246	0.134734	Duplicated homeodomain-like superfamily protein
AT5G54960.1	AT5G54960	212	189	197	172	131	136	111	199	4.15848	-0.550007	0.134734	pyruvate decarboxylase-2
AT2G30860.1	AT2G30860	6970	8444	10280	11583	7429	7889	7130	8201	10.107	-0.395003	0.134761	glutathione S-transferase PHI 9
AT2G16750.1	AT2G16750	8	12	17	11	29	17	46	26	1.86503	1.21744	0.13513	Protein kinase protein with adenine nucleotide alpha hydrolases-like domain
AT2G47810.1	AT2G47810	14	5	9	15	0	4	0	2	-0.881181	-2.9139	0.136229	nuclear factor Y, subunit B5
AT5G27120.1	AT5G27120	2317	2122	2858	2660	2870	3828	3127	3604	8.32235	0.313031	0.136353	NOP56-like pre RNA processing ribonucleoprotein
AT5G02230.2	AT5G02230	428	284	343	354	608	474	603	478	6.18257	0.515168	0.136385	Haloacid dehalogenase-like hydrolase (HAD) superfamily protein
AT5G18890.1	AT5G18890	1	8	1	7	0	0	0	0	-1.05809	-5.2405	0.137266	Inosine-uridine preferring nucleoside hydrolase family protein
AT2G37530.1	AT2G37530	17	14	4	6	2	3	0	5	1.10315	-2.1744	0.137828	unknown protein
AT3G55390.1	AT3G55390	245	293	436	312	199	302	221	285	4.93065	-0.468885	0.137828	Uncharacterised protein family (UPF0497)
AT1G21920.1	AT1G21920	215	231	233	199	139	154	194	118	4.44758	-0.644517	0.137939	Histone H3 K4-specific methyltransferase SET7/9 family protein
AT1G66200.2	AT1G66200	5594	6140	7889	7210	4966	7039	4774	6653	9.07161	-0.322491	0.137939	glutamine synthase clone F11
AT3G27250.1	AT3G27250	3	0	0	0	8	7	0	13	0.908151	2.86626	0.140193	unknown protein
AT5G20470.1	AT5G20470	9	15	0	0	0	0	0	0	-0.316874	-5.78528	0.140193	myosin, putative
AT1G72830.3	AT1G72830	101	93	137	64	131	242	181	140	3.66167	0.69556	0.141469	nuclear factor Y, subunit A3
AT3G13110.1	AT3G13110	1040	1081	1410	1480	893	1193	842	1197	7.13253	-0.405423	0.141665	serine acetyltransferase 2;2
AT4G21930.1	AT4G21930	37	25	55	27	63	58	140	44	3.66905	1.03329	0.141665	Protein of unknown function, DUF584
AT4G36540.1	AT4G36540	408	342	313	380	216	241	304	298	5.63491	-0.568338	0.143994	BR enhanced expression 2
AT2G47030.1	AT2G47030	61	45	21	23	172	105	124	118	2.25351	1.64592	0.143995	Plant invertase/pectin methylesterase inhibitor superfamily
AT5G22640.1	AT5G22640	4758	4542	4498	4338	5532	6931	6013	6422	9.22828	0.327375	0.143995	MORN (Membrane Occupation and Recognition Nexus) repeat-containing protein
AT1G31860.1	AT1G31860	154	118	139	164	222	267	191	213	4.66416	0.508474	0.14408	histidine biosynthesis bifunctional protein (HISIE)
AT4G12430.1	AT4G12430	47	42	79	69	32	27	8	26	2.06913	-1.46079	0.14408	Haloacid dehalogenase-like hydrolase (HAD) superfamily protein
AT4G12432.1	AT4G12432	47	42	79	69	32	27	8	26	2.06913	-1.46079	0.14408	conserved peptide upstream open reading frame 26
AT1G04540.1	AT1G04540	11	12	17	17	41	37	38	30	0.999676	1.25063	0.144427	Calcium-dependent lipid-binding (CaLB domain) family protein
AT1G06850.2	AT1G06850	83	90	109	115	48	83	56	84	3.74664	-0.680978	0.144427	basic leucine-zipper 52
AT4G18590.1	AT4G18590	91	99	115	141	210	219	151	142	5.3527	0.576289	0.144427	Nucleic acid-binding, OB-fold-like protein
AT5G59990.1	AT5G59990	381	557	565	589	717	954	815	963	5.36305	0.595205	0.144427	CCT motif family protein
AT5G40730.1	AT5G40730	171	127	135	80	223	187	217	257	6.24445	0.663991	0.144477	arabinogalactan protein 24
AT5G52330.1	AT5G52330	15	5	4	18	0	4	1	0	-0.577902	-3.12212	0.144477	TRAF-like superfamily protein
AT1G02300.1	AT1G02300	260	168	248	175	318	414	299	309	5.25849	0.533593	0.145384	Cysteine proteinases superfamily protein
AT1G07620.1	AT1G07620	4	4	3	0	0	0	0	0	1.25855	-4.59699	0.145481	GTP-binding protein Obg/CgtA
AT5G56860.1	AT5G56860	190	165	189	254	278	349	242	327	5.37338	0.453904	0.145481	GATA type zinc finger transcription factor family protein
AT3G14660.1	AT3G14660	102	120	102	102	140	163	184	190	4.58234	0.543398	0.146208	cytochrome P450, family 72, subfamily A, polypeptide 13
AT2G34420.1	AT2G34420	8129	6799	8752	8003	6362	6896	6232	7398	10.4006	-0.353647	0.146861	photosystem II light harvesting complex gene B1B2
AT4G37685.1	AT4G37685	15	1	0	4	0	0	0	0	-1.0299	-5.46461	0.146861	unknown protein
AT5G62920.1	AT5G62920	80	86	47	57	27	31	19	36	2.05558	-1.42029	0.147068	response regulator 6
AT2G35590.1	AT2G35590	0	0	0	0	0	2	3	6	-0.792698	4.46041	0.147516	pseudogene
AT3G14595.1	AT3G14595	244	211	295	231	321	376	285	434	5.76327	0.407353	0.147516	Ribosomal protein L18ae family
AT5G59960.1	AT5G59960	272	221	213	198	282	373	394	424	5.34436	0.575092	0.147786	unknown protein
AT5G44720.1	AT5G44720	566	846	1013	959	592	738	642	729	6.40068	-0.440294	0.148059	Molybdenum cofactor sulfurase family protein
AT3G16240.1	AT3G16240	14897	13229	17170	16246	14126	15253	10249	13858	10.7224	-0.325724	0.148086	delta tonoplast integral protein
AT3G52470.1	AT3G52470	308	348	615	425	560	768	668	597	6.13424	0.516186	0.148809	Late embryogenesis abundant (LEA) hydroxyproline-rich glycoprotein family
AT5G48485.1	AT5G48485	1347	1188	1545	1283	1094	1317	685	905	6.52996	-0.553131	0.148809	Bifunctional inhibitor/lipid-transfer protein/seed storage 2S albumin superfamily protein
AT5G59010.1	AT5G59010	140	139	186	177	104	128	100	133	3.62274	-0.584296	0.149042	Protein kinase protein with tetratricopeptide repeat domain
AT5G08330.1	AT5G08330	366	311	422	441	296	356	262	303	6.21952	-0.458857	0.149132	TCP family transcription factor
AT1G61563.1	AT1G61563	26	10	10	9	52	77	69	38	1.38692	1.95947	0.150977	ralf-like 8
AT2G37940.1	AT2G37940	130	102	140	116	119	82	48	45	3.89395	-0.839119	0.151178	Arabidopsis Inositol phosphorylceramide synthase 2
AT2G34450.2	AT2G34450	23	25	18	19	35	35	56	58	2.11306	0.988955	0.153029	HMG-box (high mobility group) DNA-binding family protein
AT2G35570.1	AT2G35570	0	0	0	0	2	2	3	6	-0.0240591	4.69805	0.153751	pseudogene
AT3G10560.1	AT3G10560	102	113	99	101	58	71	47	66	1.89253	-0.918147	0.155051	Cytochrome P450 superfamily protein
AT5G51210.1	AT5G51210	0	0	0	0	8	5	3	0	0.598862	5.00993	0.155066	oleosin3
AT1G03710.1	AT1G03710	383	354	568	343	290	331	214	278	4.579	-0.679021	0.155579	Cystatin/monellin superfamily protein
AT3G52480.1	AT3G52480	69	48	45	45	126	91	159	61	3.90348	0.984174	0.155579	unknown protein
AT4G19645.1	AT4G19645	22	27	35	27	8	20	1	6	1.48493	-1.81784	0.155579	TRAM, LAG1 and CLN8 (TLC) lipid-sensing domain containing protein
AT2G35635.1	AT2G35635	896	990	1550	1184	822	1032	832	1009	6.61156	-0.430262	0.156843	ubiquitin 7
AT3G12150.1	AT3G12150	418	362	229	311	237	252	238	257	4.72289	-0.567784	0.15819	unknown protein
AT5G59090.1	AT5G59090	72	40	45	51	18	10	27	21	0.88989	-1.54297	0.15819	subtilase 4.12
AT4G00780.1	AT4G00780	345	246	243	292	132	256	130	219	5.64387	-0.770155	0.158359	TRAF-like family protein
AT4G17260.1	AT4G17260	204	241	497	308	201	233	158	226	4.23225	-0.707941	0.158359	Lactate/malate dehydrogenase family protein
AT4G27860.2	AT4G27860	85	98	110	119	61	68	55	57	2.76992	-0.891467	0.158508	vacuolar iron transporter (VIT) family protein
AT2G23840.1	AT2G23840	11	23	19	52	6	9	15	11	2.57485	-1.45376	0.158567	HNH endonuclease
AT5G57887.1	AT5G57887	110	58	75	51	167	113	143	143	4.11246	0.835768	0.159867	unknown protein
AT1G52890.1	AT1G52890	863	633	570	714	1317	1418	2046	1540	6.99767	1.0708	0.160045	NAC domain containing protein 19
AT2G04378.1	AT2G04378	0	0	0	0	4	2	2	1	4.84197	4.19455	0.160045	Beta-galactosidase related protein
AT3G13750.1	AT3G13750	6804	5573	4499	5021	7636	8808	7287	10977	10.1843	0.516676	0.16079	beta galactosidase 1
AT1G23140.1	AT1G23140	7	5	10	17	1	0	3	8	1.34641	-1.76457	0.160871	Calcium-dependent lipid-binding (CaLB domain) family protein
AT2G16790.2	AT2G16790	2	6	3	4	0	2	0	0	0.725422	-2.76036	0.160871	P-loop containing nucleoside triphosphate hydrolases superfamily protein
AT3G04030.1	AT3G04030	4	4	2	4	0	0	0	0	-0.39751	-4.94427	0.160871	Homeodomain-like superfamily protein
AT4G08160.2	AT4G08160	91	83	104	88	117	197	141	178	3.84216	0.659461	0.160871	glycosyl hydrolase family 10 protein / carbohydrate-binding domain-containing protein
AT1G18010.1	AT1G18010	151	105	168	121	173	204	195	231	4.85733	0.446519	0.161161	Major facilitator superfamily protein
AT1G69850.1	AT1G69850	487	368	422	483	332	424	298	375	5.88031	-0.432262	0.161968	nitrate transporter 1:2
AT3G05060.1	AT3G05060	5359	5511	7391	6313	7148	9212	7735	8346	9.02121	0.286145	0.163818	NOP56-like pre RNA processing ribonucleoprotein
AT5G47455.6	AT5G47455	21	26	56	45	79	78	70	71	2.315	0.919663	0.164384	unknown protein
AT1G68570.1	AT1G68570	853	844	1252	1160	1231	1531	1316	1528	6.73303	0.337693	0.164466	Major facilitator superfamily protein
AT5G17000.1	AT5G17000	92	62	120	53	51	28	71	40	3.49626	-0.847158	0.164466	Zinc-binding dehydrogenase family protein
AT2G29470.1	AT2G29470	0	0	0	0	5	0	0	9	1.33376	4.79288	0.165045	glutathione S-transferase tau 3
AT3G60730.1	AT3G60730	0	0	0	0	7	0	9	4	-1.03991	5.37884	0.165085	Plant invertase/pectin methylesterase inhibitor superfamily
AT1G21310.1	AT1G21310	116	200	171	119	214	339	396	352	6.39422	0.977457	0.165209	extensin 3
AT2G31410.1	AT2G31410	1844	1961	2795	2132	2479	3637	2729	3293	7.65679	0.357096	0.165209	unknown protein
AT4G14716.1	AT4G14716	545	431	530	526	351	518	399	440	5.82609	-0.377579	0.165209	acireductone dioxygenase 1
AT4G19200.1	AT4G19200	996	1000	1020	1094	746	984	923	964	7.19052	-0.309608	0.165209	proline-rich family protein
AT5G42200.1	AT5G42200	198	171	134	219	106	96	114	153	4.09591	-0.753381	0.165209	RING/U-box superfamily protein
AT1G74070.1	AT1G74070	370	354	411	341	275	350	253	296	5.54643	-0.457364	0.165982	Cyclophilin-like peptidyl-prolyl cis-trans isomerase family protein
AT2G23140.2	AT2G23140	116	129	117	132	59	115	75	92	3.74432	-0.678195	0.166056	RING/U-box superfamily protein with ARM repeat domain
AT5G51260.1	AT5G51260	44	59	96	55	13	31	41	26	2.32955	-1.27777	0.166056	HAD superfamily, subfamily IIIB acid phosphatase
AT1G73630.1	AT1G73630	295	292	421	323	147	232	278	286	4.75219	-0.602556	0.167591	EF hand calcium-binding protein family
AT3G15210.1	AT3G15210	748	520	642	719	371	492	485	618	5.77922	-0.543737	0.168047	ethylene responsive element binding factor 4
AT2G05070.1	AT2G05070	2426	2108	3179	3247	2074	1833	2215	2378	9.11719	-0.46327	0.168886	photosystem II light harvesting complex gene 2.2
AT5G03360.2	AT5G03360	39	28	10	18	13	6	8	7	1.38012	-1.61228	0.169977	DC1 domain-containing protein
AT2G42830.1	AT2G42830	697	635	809	737	496	720	483	569	5.06647	-0.471345	0.17014	K-box region and MADS-box transcription factor family protein
AT5G01870.1	AT5G01870	6	11	12	9	46	21	21	18	2.25822	1.3744	0.17014	Bifunctional inhibitor/lipid-transfer protein/seed storage 2S albumin superfamily protein
AT1G27300.1	AT1G27300	307	345	354	271	482	574	513	443	5.6162	0.534796	0.170281	unknown protein
AT1G52230.1	AT1G52230	3911	3348	4189	3861	3299	3670	2977	3367	9.53536	-0.321267	0.170581	photosystem I subunit H2
AT3G03150.1	AT3G03150	532	467	529	468	353	525	358	423	5.99558	-0.400441	0.170581	unknown protein
AT4G39620.1	AT4G39620	48	27	78	42	79	77	136	90	2.99918	0.907181	0.172932	Tetratricopeptide repeat (TPR)-like superfamily protein
AT4G13575.1	AT4G13575	4	2	3	0	0	0	0	0	3.05886	-4.30668	0.173125	unknown protein
AT5G25050.1	AT5G25050	39	41	57	40	93	64	83	90	3.17433	0.799572	0.173125	Major facilitator superfamily protein
AT3G25165.1	AT3G25165	34	3	17	11	54	37	52	63	1.29121	1.55917	0.174221	ralf-like 25
AT5G43270.3	AT5G43270	112	95	135	109	78	106	69	61	3.02293	-0.640603	0.174279	squamosa promoter binding protein-like 2
AT3G61140.1	AT3G61140	62	36	79	70	117	104	86	96	3.37552	0.603962	0.17567	26S proteasome, regulatory subunit Rpn7;Proteasome component (PCI) domain
AT5G05210.1	AT5G05210	1756	1719	2012	1752	2184	2825	2391	2689	7.59443	0.355742	0.17567	Surfeit locus protein 6
AT5G58860.1	AT5G58860	0	7	4	1	0	0	0	0	-0.342508	-4.7244	0.176876	cytochrome P450, family 86, subfamily A, polypeptide 1
AT1G08510.1	AT1G08510	1904	1349	2033	1559	2081	2821	2255	2155	8.09596	0.328848	0.177763	fatty acyl-ACP thioesterases B
AT1G22340.1	AT1G22340	22	4	16	25	8	7	1	1	0.915924	-2.06131	0.178602	UDP-glucosyl transferase 85A7
AT1G45163.1	AT1G45163	3	0	4	2	4	9	14	14	2.64085	2.04236	0.178602	unknown protein
AT2G05100.1	AT2G05100	3339	3115	4258	4633	2773	3263	3127	3405	9.82554	-0.398083	0.178722	photosystem II light harvesting complex gene 2.1
AT3G07650.2	AT3G07650	537	553	419	427	331	497	332	451	5.76837	-0.417979	0.178722	CONSTANS-like 9
AT4G13260.1	AT4G13260	0	0	1	3	0	7	6	12	0.466452	2.3801	0.178722	Flavin-binding monooxygenase family protein
AT5G57190.1	AT5G57190	9	3	1	10	1	0	1	0	-0.273787	-3.33965	0.178722	phosphatidylserine decarboxylase 2
AT5G64600.1	AT5G64600	44	26	48	47	18	1	22	13	1.73119	-1.64866	0.178722	O-fucosyltransferase family protein
AT2G45960.1	AT2G45960	9728	9358	11954	10351	8364	9623	7860	9411	10.3376	-0.349912	0.179174	plasma membrane intrinsic protein 1B
AT5G44582.1	AT5G44582	1	1	4	2	12	10	9	4	1.16994	1.98199	0.179174	unknown protein
AT5G49390.1	AT5G49390	18	22	29	27	13	7	8	2	0.973251	-1.74465	0.179851	unknown protein
AT1G27080.1	AT1G27080	5	7	9	10	4	0	1	0	-0.286312	-2.59217	0.179876	nitrate transporter 1.6
AT4G21380.1	AT4G21380	11	6	6	7	8	19	32	26	1.4359	1.37305	0.180965	receptor kinase 3
AT1G79180.1	AT1G79180	31	34	68	25	9	26	16	8	2.09953	-1.51664	0.182155	myb domain protein 63
AT5G42650.1	AT5G42650	190	144	248	243	103	177	146	206	5.79696	-0.501436	0.182453	allene oxide synthase
AT5G56150.2	AT5G56150	370	316	390	415	308	351	246	276	5.24842	-0.459171	0.182453	ubiquitin-conjugating enzyme 30
AT4G15120.1	AT4G15120	29	34	21	22	6	6	9	5	0.705527	-2.13237	0.182639	VQ motif-containing protein
AT4G00870.1	AT4G00870	862	672	1095	917	1282	1548	1078	1553	6.17318	0.505845	0.182887	basic helix-loop-helix (bHLH) DNA-binding superfamily protein
AT1G69390.1	AT1G69390	284	253	346	257	248	234	212	257	5.18358	-0.373991	0.182975	homologue of bacterial MinE 1
AT4G10120.1	AT4G10120	21	35	30	16	14	15	18	14	4.24577	-0.856972	0.182975	Sucrose-phosphate synthase family protein
AT1G57943.1	AT1G57943	0	0	0	0	0	4	7	3	-0.663806	4.82269	0.18306	purine permease 17
AT4G31890.2	AT4G31890	0	0	7	2	21	19	5	20	-0.0209447	2.73175	0.183158	ARM repeat superfamily protein
AT2G28950.1	AT2G28950	391	396	625	482	391	352	343	402	6.25462	-0.447497	0.183775	expansin A6
AT3G43220.2	AT3G43220	100	91	153	108	49	103	70	97	3.50528	-0.623004	0.183775	Phosphoinositide phosphatase family protein
AT4G21910.4	AT4G21910	637	718	948	923	987	1266	1121	1046	6.35352	0.34395	0.183775	MATE efflux family protein
AT2G46915.1	AT2G46915	123	84	104	64	41	59	64	88	3.27837	-0.69918	0.184231	Protein of unknown function (DUF3754)
AT3G01970.1	AT3G01970	9	5	0	9	17	20	23	27	1.87615	1.74928	0.184625	WRKY DNA-binding protein 45
AT5G13420.1	AT5G13420	753	656	981	999	616	842	552	796	6.22378	-0.395056	0.184625	Aldolase-type TIM barrel family protein
AT1G18480.1	AT1G18480	38	62	87	45	112	93	96	136	3.00987	0.810078	0.185321	Calcineurin-like metallo-phosphoesterase superfamily protein
AT4G38080.1	AT4G38080	9	0	0	4	1	0	0	0	1.16799	-3.28392	0.185321	hydroxyproline-rich glycoprotein family protein
AT4G01480.1	AT4G01480	1473	1363	1985	1345	1066	1578	1097	1488	7.62994	-0.360803	0.185569	pyrophosphorylase 5
AT4G15550.1	AT4G15550	727	571	548	803	808	1095	1141	876	6.39865	0.443949	0.186702	indole-3-acetate beta-D-glucosyltransferase
AT1G65820.2	AT1G65820	425	425	544	497	579	688	716	611	6.08331	0.348529	0.186983	microsomal glutathione s-transferase, putative
AT1G70070.1	AT1G70070	38	74	69	81	72	138	120	124	3.46076	0.664303	0.186983	DEAD/DEAH box helicase, putative
AT3G51550.1	AT3G51550	436	376	369	325	302	385	226	334	6.4779	-0.415451	0.186983	Malectin/receptor-like protein kinase family protein
AT4G26200.1	AT4G26200	5	3	1	0	0	0	0	0	2.97127	-4.3318	0.186983	1-amino-cyclopropane-1-carboxylate synthase 7
AT5G23170.1	AT5G23170	17	0	24	18	1	2	7	4	0.652589	-2.07903	0.186983	Protein kinase superfamily protein
ATCG01000.1	ATCG01000	3727	3260	4002	3655	4551	6016	5407	6239	9.07732	0.479265	0.186983	Ycf1 protein
AT1G20850.1	AT1G20850	265	313	458	382	495	627	429	480	5.71221	0.404486	0.187147	xylem cysteine peptidase 2
AT5G67410.1	AT5G67410	1	0	0	1	15	4	3	7	-0.728827	3.4665	0.187147	unknown protein
AT5G61570.2	AT5G61570	3	2	7	0	0	0	0	0	-0.348789	-4.6666	0.187196	Protein kinase superfamily protein
AT3G21500.1	AT3G21500	19	11	10	16	37	61	39	37	1.63306	1.48377	0.188685	1-deoxy-D-xylulose 5-phosphate synthase 1
AT3G25805.1	AT3G25805	186	203	305	312	220	238	123	207	4.96715	-0.471817	0.188685	unknown protein
AT4G22115.1	AT4G22115	0	6	7	0	0	0	0	0	2.25994	-4.79995	0.188886	SCR-like 14
AT1G19500.1	AT1G19500	4	0	5	0	18	23	9	16	-0.417466	2.71164	0.189688	unknown protein
AT3G29020.2	AT3G29020	12	3	1	23	0	2	0	0	-0.961484	-4.15912	0.190168	myb domain protein 110
AT4G35920.1	AT4G35920	164	167	234	174	140	153	117	155	4.53003	-0.50257	0.191815	PLAC8 family protein
AT2G24060.1	AT2G24060	1169	991	1278	970	1291	1707	1379	1596	7.30152	0.315645	0.19275	Translation initiation factor 3 protein
AT1G07790.1	AT1G07790	1966	2104	2740	2238	2125	1924	1690	1906	7.35594	-0.35175	0.192957	Histone superfamily protein
AT1G08140.1	AT1G08140	0	0	0	0	5	12	0	5	-1.33725	5.36727	0.192957	cation/H+ exchanger 6A
AT1G29418.1	AT1G29418	1442	1339	1686	1556	2262	2597	1594	2058	7.18322	0.37234	0.192957	unknown protein
AT4G25433.1	AT4G25433	11	18	39	28	9	13	4	5	0.925121	-1.719	0.192957	peptidoglycan-binding LysM domain-containing protein
AT3G60420.1	AT3G60420	22	4	13	13	20	20	53	22	4.65779	1.06212	0.193856	Phosphoglycerate mutase family protein
AT5G07780.1	AT5G07780	0	1	0	0	2	5	7	3	-0.363294	3.44715	0.193913	Actin-binding FH2 (formin homology 2) family protein
AT2G29500.1	AT2G29500	0	0	5	0	11	2	6	10	2.13406	2.38347	0.194269	HSP20-like chaperones superfamily protein
AT3G20220.1	AT3G20220	14	14	1	15	39	38	30	56	1.31794	1.70243	0.194269	SAUR-like auxin-responsive protein family
AT1G05260.1	AT1G05260	142	126	133	75	80	91	68	69	4.95195	-0.756574	0.19508	Peroxidase superfamily protein
AT3G15950.2	AT3G15950	1	4	2	8	2	0	0	1	5.47498	-2.25778	0.195698	DNA topoisomerase-related
AT1G15390.1	AT1G15390	60	59	76	60	100	115	118	124	3.65257	0.728923	0.197712	peptide deformylase 1A
AT5G43860.1	AT5G43860	39	36	39	26	11	21	26	17	1.96596	-1.01271	0.198485	chlorophyllase 2
AT3G45650.1	AT3G45650	2	4	1	0	8	13	14	4	0.910001	2.26961	0.200595	nitrate excretion transporter1
AT4G35190.1	AT4G35190	401	523	959	448	920	1247	923	1136	5.15751	0.759264	0.200999	Putative lysine decarboxylase family protein
AT5G46240.1	AT5G46240	82	139	146	109	50	102	35	68	3.5555	-1.05535	0.200999	potassium channel in Arabidopsis thaliana 1
AT5G43700.1	AT5G43700	782	710	909	699	663	696	593	702	6.61651	-0.341083	0.201303	AUX/IAA transcriptional regulator family protein
AT3G46130.2	AT3G46130	9	1	0	0	0	0	0	0	1.84773	-4.49065	0.201406	myb domain protein 48
AT4G29030.1	AT4G29030	1214	1291	1906	1142	1137	986	761	997	7.05905	-0.622752	0.202523	Putative membrane lipoprotein
AT1G22190.1	AT1G22190	81	78	60	48	93	130	158	95	5.18446	0.710414	0.202528	Integrase-type DNA-binding superfamily protein
AT1G11580.1	AT1G11580	448	620	902	804	449	663	503	629	6.00628	-0.41954	0.202709	methylesterase PCR A
AT1G55560.1	AT1G55560	9	2	3	7	21	13	34	34	0.205444	2.15498	0.202713	SKU5 similar 14
AT3G49390.2	AT3G49390	133	118	155	107	84	116	103	52	3.30004	-0.639635	0.202713	CTC-interacting domain 10
AT2G11620.1	AT2G11620	6	1	4	17	0	0	0	2	0.172907	-3.62633	0.203281	unknown protein
AT2G38300.1	AT2G38300	1	2	1	8	0	0	0	0	0.0322425	-4.71069	0.204595	myb-like HTH transcriptional regulator family protein
AT3G48990.1	AT3G48990	696	474	648	601	799	993	781	887	6.81309	0.394259	0.204596	AMP-dependent synthetase and ligase family protein
AT1G04550.1	AT1G04550	567	612	773	515	524	572	437	560	5.7646	-0.356541	0.204919	AUX/IAA transcriptional regulator family protein
AT3G48180.1	AT3G48180	49	55	71	50	41	28	34	41	2.5255	-0.747882	0.205178	unknown protein
AT1G02205.3	AT1G02205	596	490	841	699	962	1102	839	817	6.07753	0.398035	0.205669	Fatty acid hydroxylase superfamily
AT5G13740.1	AT5G13740	166	138	219	113	270	284	227	245	4.4705	0.581754	0.205669	zinc induced facilitator 1
AT3G53960.1	AT3G53960	102	70	123	92	147	147	169	123	3.88919	0.502445	0.20603	Major facilitator superfamily protein
AT3G04445.1	AT3G04445	9	9	23	17	5	9	1	6	0.57543	-1.56136	0.206111	pseudogene
AT5G42300.1	AT5G42300	1049	1086	1389	974	1006	1066	847	1051	6.94392	-0.297592	0.206111	ubiquitin-like protein 5
AT1G52790.1	AT1G52790	2	2	1	9	0	0	0	0	-0.83047	-4.92808	0.206112	2-oxoglutarate (2OG) and Fe(II)-dependent oxygenase superfamily protein
AT2G14560.2	AT2G14560	26	17	30	9	42	34	29	58	5.09021	0.872225	0.207006	Protein of unknown function (DUF567)
AT4G35510.1	AT4G35510	117	63	100	116	65	99	50	61	3.31921	-0.656112	0.207103	unknown protein
AT3G18490.1	AT3G18490	741	756	723	664	950	985	1055	1026	6.91501	0.356935	0.207276	Eukaryotic aspartyl protease family protein
AT4G17670.1	AT4G17670	1655	1364	2321	1637	1085	1471	1075	1408	6.58184	-0.582646	0.207276	Protein of unknown function (DUF581)
AT4G24140.1	AT4G24140	0	1	0	1	4	5	0	8	-0.0254529	2.66908	0.207276	alpha/beta-Hydrolases superfamily protein
AT1G60740.1	AT1G60740	240	281	570	425	214	195	145	187	3.65711	-1.12092	0.207446	Thioredoxin superfamily protein
AT5G02750.1	AT5G02750	112	138	198	163	206	315	223	234	3.78177	0.56213	0.207446	RING/U-box superfamily protein
AT3G13380.1	AT3G13380	55	18	47	57	29	15	16	22	2.10805	-1.1991	0.208842	BRI1-like 3
AT5G56100.1	AT5G56100	155	112	66	114	184	182	346	144	5.88229	0.828693	0.208842	glycine-rich protein / oleosin
AT2G33835.1	AT2G33835	40	52	44	26	20	27	19	7	1.79269	-1.27526	0.210142	Zinc finger C-x8-C-x5-C-x3-H type family protein
AT2G40010.1	AT2G40010	74	85	103	95	163	161	97	170	4.06797	0.60054	0.211907	Ribosomal protein L10 family protein
AT3G54060.1	AT3G54060	0	1	1	1	2	10	6	3	0.502803	2.49758	0.211907	unknown protein
AT5G44620.1	AT5G44620	1756	1806	2746	2129	1515	1270	909	1083	6.05836	-0.923739	0.211907	cytochrome P450, family 706, subfamily A, polypeptide 3
AT3G28450.1	AT3G28450	78	78	45	53	38	50	38	29	2.72059	-0.859281	0.211953	Leucine-rich repeat protein kinase family protein
AT1G48750.1	AT1G48750	1425	1068	1844	1244	2164	2367	1667	2023	6.63454	0.449468	0.212031	Bifunctional inhibitor/lipid-transfer protein/seed storage 2S albumin superfamily protein
AT5G53710.1	AT5G53710	1	1	1	0	5	8	0	10	1.27408	2.59435	0.212031	unknown protein
AT3G22540.1	AT3G22540	57	55	97	47	5	48	29	43	3.2796	-1.16432	0.212318	Protein of unknown function (DUF1677)
AT5G54270.1	AT5G54270	4978	4238	5142	5773	4238	4158	3805	4467	9.9366	-0.388804	0.212725	light-harvesting chlorophyll B-binding protein 3
AT1G34430.1	AT1G34430	417	349	440	345	329	295	286	313	5.22965	-0.455288	0.21349	2-oxoacid dehydrogenases acyltransferase family protein
AT2G27770.1	AT2G27770	191	222	372	253	140	182	140	274	4.41832	-0.609953	0.21349	Plant protein of unknown function (DUF868)
AT5G18130.2	AT5G18130	21	26	14	6	24	36	49	57	3.22907	1.15817	0.21349	unknown protein
AT4G27170.1	AT4G27170	12	0	0	0	0	0	0	0	2.09041	-4.74825	0.21357	seed storage albumin 4
AT2G16740.1	AT2G16740	204	178	220	170	107	192	116	132	4.03107	-0.63202	0.213577	ubiquitin-conjugating enzyme 29
AT1G51500.1	AT1G51500	184	114	220	194	261	304	223	232	5.55515	0.409609	0.214609	ABC-2 type transporter family protein
AT2G13360.1	AT2G13360	5492	4131	3808	3844	5615	6784	5681	6052	10.3481	0.34553	0.215127	alanine:glyoxylate aminotransferase
AT4G25990.2	AT4G25990	10	13	10	17	20	23	15	59	3.62787	1.07042	0.215127	CCT motif family protein
AT5G37478.1	AT5G37478	1	2	3	3	0	8	12	13	3.65034	1.7072	0.215127	TPX2 (targeting protein for Xklp2) protein family
AT2G07687.1	AT2G07687	12	14	7	1	0	1	0	4	-0.0508598	-2.84618	0.216442	Cytochrome c oxidase, subunit III
AT4G27840.1	AT4G27840	421	475	581	486	334	397	350	497	5.7004	-0.435923	0.216442	SNARE-like superfamily protein
AT4G39260.3	AT4G39260	16124	15129	17981	17488	14390	16788	12983	15267	10.6988	-0.290492	0.216983	cold, circadian rhythm, and RNA binding 1
AT1G68600.1	AT1G68600	90	107	172	95	76	73	80	87	3.81105	-0.649511	0.217293	Aluminium activated malate transporter family protein
AT1G34315.1	AT1G34315	0	3	0	1	6	16	8	2	0.381663	2.69343	0.218343	unknown protein
AT3G23790.1	AT3G23790	48	59	58	26	20	28	7	5	1.28752	-1.81573	0.218343	AMP-dependent synthetase and ligase family protein
AT4G22950.1	AT4G22950	0	4	3	12	0	0	0	0	-0.926279	-5.34543	0.218438	AGAMOUS-like 19
AT2G26110.1	AT2G26110	493	431	581	480	596	791	520	781	5.68154	0.309462	0.219358	Protein of unknown function (DUF761)
AT3G12110.1	AT3G12110	770	621	768	722	603	747	406	473	5.96156	-0.502198	0.219665	actin-11
AT2G04795.1	AT2G04795	167	130	114	116	200	257	183	180	5.02923	0.499474	0.220328	unknown protein
AT3G12290.1	AT3G12290	309	295	316	330	275	257	245	271	5.07462	-0.373129	0.220784	Amino acid dehydrogenase family protein
AT2G29300.1	AT2G29300	5	3	4	9	15	16	11	19	2.52722	1.39208	0.22083	NAD(P)-binding Rossmann-fold superfamily protein
AT5G66660.1	AT5G66660	0	0	1	0	0	6	6	5	0.708309	3.45804	0.22083	Protein of unknown function (DUF677)
AT3G20865.1	AT3G20865	67	53	79	62	144	179	42	131	2.93756	0.780412	0.221154	arabinogalactan protein 40
AT4G38060.2	AT4G38060	304	222	253	225	299	416	370	382	5.64815	0.420359	0.221566	unknown protein
AT2G27180.1	AT2G27180	38	29	29	27	133	92	57	80	2.29174	1.42599	0.221642	unknown protein
AT2G14540.1	AT2G14540	2	3	8	3	0	0	0	0	-0.964015	-5.0628	0.221684	serpin 2
AT2G23760.3	AT2G23760	29	67	53	48	64	103	74	103	4.48565	0.663495	0.221723	BEL1-like homeodomain 4
AT4G15910.1	AT4G15910	584	549	736	595	849	1028	707	1085	5.68037	0.448904	0.221938	drought-induced 21
AT1G58160.1	AT1G58160	4	7	2	0	0	0	0	0	1.23908	-4.87207	0.222174	Mannose-binding lectin superfamily protein
AT2G19810.1	AT2G19810	47	95	76	64	38	79	28	46	3.32526	-0.719118	0.222174	CCCH-type zinc finger family protein
AT3G61680.1	AT3G61680	7	2	2	5	0	1	0	0	-0.771985	-3.5925	0.222174	alpha/beta-Hydrolases superfamily protein
AT3G45160.1	AT3G45160	731	538	1093	876	548	713	572	489	6.68778	-0.575926	0.222191	Putative membrane lipoprotein
AT4G34030.1	AT4G34030	324	321	317	269	427	453	438	571	5.34626	0.489501	0.223249	3-methylcrotonyl-CoA carboxylase
AT4G00670.1	AT4G00670	101	53	140	110	39	67	44	63	3.92823	-1.03039	0.223661	Remorin family protein
AT1G78770.1	AT1G78770	142	170	179	229	110	165	92	156	3.27673	-0.600852	0.225577	anaphase promoting complex 6
AT4G21585.1	AT4G21585	4	7	9	7	0	0	3	0	-1.06454	-3.02526	0.225577	endonuclease 4
AT5G12180.1	AT5G12180	16	22	16	13	57	54	50	65	1.12975	1.61058	0.22646	calcium-dependent protein kinase 17
AT1G10770.1	AT1G10770	62	35	34	8	104	86	81	71	1.94803	1.16793	0.226707	Plant invertase/pectin methylesterase inhibitor superfamily protein
AT5G02020.2	AT5G02020	43	52	35	24	51	59	115	105	3.77903	0.974678	0.227888	unknown protein
AT5G62560.1	AT5G62560	526	409	550	468	310	463	345	520	5.88397	-0.383287	0.227895	RING/U-box superfamily protein with ARM repeat domain
AT3G20395.1	AT3G20395	3	7	11	30	5	4	0	0	0.462572	-2.54872	0.228294	RING/U-box superfamily protein
AT5G39380.1	AT5G39380	348	267	355	405	230	317	277	299	4.95707	-0.411376	0.229758	Plant calmodulin-binding protein-related
AT5G40450.1	AT5G40450	6401	5497	6026	5351	7412	11293	8960	9021	10.0313	0.525118	0.230041	unknown protein
AT4G14315.1	AT4G14315	1	0	0	0	4	2	6	21	-0.980596	4.35625	0.231199	unknown protein
AT5G44270.1	AT5G44270	0	0	0	0	9	3	0	2	-1.11383	4.81142	0.231199	TPX2 (targeting protein for Xklp2) protein family
AT2G30550.2	AT2G30550	71	44	70	68	113	101	73	146	4.0253	0.652447	0.232074	alpha/beta-Hydrolases superfamily protein
AT5G24740.2	AT5G24740	7	2	18	19	5	0	1	0	-0.241569	-2.85254	0.232651	Protein of unknown function (DUF1162)
AT3G50130.1	AT3G50130	0	0	0	0	6	7	0	4	-0.799158	5.03444	0.233254	Plant protein of unknown function (DUF247)
AT1G04980.1	AT1G04980	88	42	91	86	71	37	36	36	3.46128	-0.856748	0.233396	PDI-like 2-2
AT1G06190.1	AT1G06190	1021	950	1209	1051	1329	1553	1196	1629	7.41711	0.308615	0.233396	Rho termination factor
AT3G10190.1	AT3G10190	419	336	354	357	258	337	251	323	4.7	-0.461676	0.233396	Calcium-binding EF-hand family protein
AT5G26667.1	AT5G26667	365	313	400	346	306	352	178	268	5.14587	-0.498852	0.233396	P-loop containing nucleoside triphosphate hydrolases superfamily protein
AT3G51600.1	AT3G51600	3515	2196	2952	2917	3740	4706	3583	3788	9.61301	0.325761	0.23361	lipid transfer protein 5
AT5G22850.1	AT5G22850	392	337	473	402	322	374	311	392	5.27975	-0.314069	0.234724	Eukaryotic aspartyl protease family protein
AT5G27890.1	AT5G27890	0	0	0	0	0	0	2	7	1.09776	4.18839	0.234945	unknown protein
AT3G08040.1	AT3G08040	59	89	50	114	24	66	48	33	3.12264	-1.01802	0.235499	MATE efflux family protein
AT5G24105.1	AT5G24105	203	138	238	136	258	305	224	309	4.91851	0.50051	0.235499	arabinogalactan protein 41
AT1G08640.1	AT1G08640	811	733	827	854	1127	1126	858	1200	6.96127	0.292602	0.238113	Chloroplast J-like domain 1
AT3G05200.1	AT3G05200	107	34	35	60	50	48	10	19	3.29687	-1.04837	0.238113	RING/U-box superfamily protein
AT3G22930.1	AT3G22930	126	195	162	137	306	425	141	363	6.25109	0.827898	0.238113	calmodulin-like 11
AT3G24420.1	AT3G24420	68	26	52	96	56	42	28	6	3.69538	-0.968301	0.238113	alpha/beta-Hydrolases superfamily protein
AT4G01060.3	AT4G01060	49	49	31	34	101	70	69	63	3.45993	0.765078	0.238113	CAPRICE-like MYB3
AT3G14530.1	AT3G14530	48	38	27	5	13	4	18	2	1.90384	-1.74359	0.238421	Terpenoid synthases superfamily protein
AT4G03930.1	AT4G03930	0	0	0	0	1	14	0	1	0.240067	4.88772	0.238474	Plant invertase/pectin methylesterase inhibitor superfamily
AT3G28740.1	AT3G28740	10	7	6	3	1	1	0	1	-0.0902457	-3.06567	0.238632	Cytochrome P450 superfamily protein
AT5G05390.1	AT5G05390	8	13	6	7	0	8	0	4	4.55346	-1.64508	0.240331	laccase 12
AT1G80050.1	AT1G80050	263	267	321	343	435	512	337	451	5.27822	0.412645	0.240552	adenine phosphoribosyl transferase 2
AT1G03400.1	AT1G03400	37	45	16	42	18	18	28	16	3.10334	-0.937482	0.240866	2-oxoglutarate (2OG) and Fe(II)-dependent oxygenase superfamily protein
AT1G13100.1	AT1G13100	0	5	0	4	0	0	0	0	1.40947	-4.34536	0.240866	cytochrome P450, family 71, subfamily B, polypeptide 29
AT1G68440.1	AT1G68440	622	645	455	495	722	933	786	973	6.64143	0.474558	0.240866	unknown protein
AT3G62650.1	AT3G62650	452	363	488	433	580	661	571	770	6.06597	0.452675	0.240965	unknown protein
AT1G17950.1	AT1G17950	13	10	4	17	3	0	3	3	0.429606	-2.34295	0.241091	myb domain protein 52
AT1G75040.1	AT1G75040	93	84	160	89	70	68	74	50	4.13815	-0.783048	0.242824	pathogenesis-related gene 5
AT2G41740.1	AT2G41740	1605	1236	1868	1833	1312	1695	1131	1650	7.40097	-0.299812	0.242824	villin 2
AT5G24340.1	AT5G24340	24	32	34	26	67	59	48	49	2.27724	0.824619	0.242824	3'-5' exonuclease domain-containing protein
AT1G56130.1	AT1G56130	2	4	4	7	18	16	2	28	0.882641	1.73291	0.243168	Leucine-rich repeat transmembrane protein kinase
AT2G47010.2	AT2G47010	104	67	99	77	134	134	125	165	4.05453	0.568737	0.243361	unknown protein
AT4G26420.2	AT4G26420	2	3	0	0	1	8	10	16	0.610391	2.52536	0.243361	S-adenosyl-L-methionine-dependent methyltransferases superfamily protein
AT2G40530.1	AT2G40530	81	59	76	70	35	43	63	46	3.15279	-0.716816	0.243393	unknown protein
AT1G67910.2	AT1G67910	32	14	19	17	40	53	40	47	2.43879	0.999421	0.245187	unknown protein
AT1G70210.1	AT1G70210	545	509	813	582	444	588	407	595	5.4684	-0.384857	0.245187	CYCLIN D1;1
AT3G13550.1	AT3G13550	57	67	78	76	54	42	48	46	2.71821	-0.655329	0.245191	Ubiquitin-conjugating enzyme family protein
AT4G13493.1	AT4G13493	3	0	2	8	0	0	0	0	-1.40701	-4.80197	0.246043	MIR850a; miRNA
AT4G00030.1	AT4G00030	10	43	42	35	44	49	74	94	2.94788	0.893592	0.247617	Plastid-lipid associated protein PAP / fibrillin family protein
AT1G12140.1	AT1G12140	489	428	537	424	326	437	356	464	6.06572	-0.371732	0.247907	flavin-monooxygenase glucosinolate S-oxygenase 5
AT3G27160.1	AT3G27160	3100	2789	2899	2836	3633	4379	3534	3739	8.90131	0.266336	0.248516	Ribosomal protein S21 family protein
AT2G28120.1	AT2G28120	27	24	24	18	44	44	47	45	3.4094	0.831012	0.248797	Major facilitator superfamily protein
AT5G01390.4	AT5G01390	114	141	145	163	207	214	251	196	3.9923	0.516111	0.248797	DNAJ heat shock family protein
AT5G59540.1	AT5G59540	0	1	0	0	0	0	3	10	2.3207	3.05678	0.249636	2-oxoglutarate (2OG) and Fe(II)-dependent oxygenase superfamily protein
AT1G44100.1	AT1G44100	699	575	793	818	490	789	461	557	6.08339	-0.45957	0.249935	amino acid permease 5
AT4G14465.1	AT4G14465	0	11	3	7	0	0	2	0	0.568163	-3.21635	0.250145	AT-hook motif nuclear-localized protein 20
AT4G29890.1	AT4G29890	140	60	99	114	56	85	57	70	3.14241	-0.751989	0.250349	choline monooxygenase, putative (CMO-like)
AT1G67080.1	AT1G67080	504	430	567	461	476	428	331	343	5.48233	-0.426837	0.250572	abscisic acid (aba)-deficient 4
AT3G04290.1	AT3G04290	1162	1034	1492	1183	1940	1955	1356	1905	7.34465	0.438283	0.250933	Li-tolerant lipase 1
AT1G03100.1	AT1G03100	31	17	16	19	22	46	59	72	1.9179	1.12228	0.250957	Pentatricopeptide repeat (PPR) superfamily protein
AT1G75010.1	AT1G75010	48	37	71	67	38	24	10	52	2.69276	-0.961616	0.250976	GTP binding
AT2G44290.1	AT2G44290	21	29	23	15	52	35	72	34	4.30194	1.03555	0.250993	Bifunctional inhibitor/lipid-transfer protein/seed storage 2S albumin superfamily protein
AT1G74640.1	AT1G74640	70	71	72	91	35	64	26	69	3.23631	-0.801431	0.253449	alpha/beta-Hydrolases superfamily protein
AT1G80470.1	AT1G80470	0	0	0	0	1	6	4	2	-1.64293	4.686	0.254321	F-box/RNI-like/FBD-like domains-containing protein
AT3G01690.1	AT3G01690	1290	1262	1550	1224	1126	1387	1153	1012	6.65931	-0.303402	0.256626	alpha/beta-Hydrolases superfamily protein
AT3G19480.1	AT3G19480	89	64	95	81	68	43	35	78	3.79842	-0.669688	0.256626	D-3-phosphoglycerate dehydrogenase
AT3G48640.1	AT3G48640	19	12	22	17	8	42	77	45	3.23008	1.20571	0.256626	unknown protein
AT4G37080.1	AT4G37080	580	448	629	588	374	661	375	456	6.24071	-0.400078	0.256626	Protein of unknown function, DUF547
AT5G09220.1	AT5G09220	1031	965	1277	1137	731	971	748	860	6.25863	-0.534245	0.256626	amino acid permease 2
AT5G10980.1	AT5G10980	2179	2295	2913	2698	2170	2552	2108	2207	7.97911	-0.27342	0.256626	Histone superfamily protein
AT5G22608.2	AT5G22608	131	97	157	150	101	63	95	83	3.65557	-0.73098	0.256626	unknown protein
AT1G21440.1	AT1G21440	850	811	987	1348	832	913	637	863	6.30456	-0.424043	0.256729	Phosphoenolpyruvate carboxylase family protein
AT2G43440.1	AT2G43440	8	1	3	0	0	0	0	0	-0.158709	-4.71255	0.256729	F-box and associated interaction domains-containing protein
AT4G30560.1	AT4G30560	73	100	132	106	45	73	36	82	2.66363	-0.935429	0.256871	cyclic nucleotide gated channel 9
AT2G33775.1	AT2G33775	49	26	12	2	86	74	55	101	2.11042	1.64595	0.257065	ralf-like 19
AT5G01360.1	AT5G01360	4	4	6	0	19	4	29	2	2.69036	1.88701	0.257509	Plant protein of unknown function (DUF828)
AT5G13320.1	AT5G13320	102	107	139	167	179	318	176	262	3.82746	0.723854	0.257509	Auxin-responsive GH3 family protein
AT1G18810.1	AT1G18810	164	201	236	248	109	155	171	153	4.38862	-0.640098	0.257971	phytochrome kinase substrate-related
AT2G45070.2	AT2G45070	891	859	1277	1102	917	872	894	860	6.91272	-0.319838	0.257971	Preprotein translocase Sec, Sec61-beta subunit protein
AT3G12180.1	AT3G12180	70	79	117	97	134	192	137	174	3.70611	0.69317	0.257971	Cornichon family protein
AT3G26690.2	AT3G26690	32	42	46	28	60	68	61	75	2.52283	0.712456	0.257971	nudix hydrolase homolog 13
AT1G05300.1	AT1G05300	53	20	32	27	21	20	15	1	2.09425	-1.31141	0.258482	zinc transporter 5 precursor
AT1G75450.1	AT1G75450	177	172	150	170	132	133	102	122	3.83779	-0.585384	0.258839	cytokinin oxidase 5
AT3G22410.1	AT3G22410	69	48	68	29	89	113	86	154	2.81892	0.91424	0.259409	Sec14p-like phosphatidylinositol transfer family protein
AT2G27820.1	AT2G27820	116	79	104	95	59	88	62	87	3.82481	-0.541821	0.259491	prephenate dehydratase 1
AT5G37380.4	AT5G37380	194	152	164	171	106	149	124	168	3.99406	-0.448186	0.259491	Chaperone DnaJ-domain superfamily protein
AT3G50390.1	AT3G50390	0	0	0	0	0	9	0	5	-0.481881	4.71273	0.260516	Transducin/WD40 repeat-like superfamily protein
AT5G58320.1	AT5G58320	180	110	106	168	81	94	120	107	3.96895	-0.609012	0.260516	Kinase interacting (KIP1-like) family protein
AT3G51920.1	AT3G51920	15	10	41	39	46	53	52	34	4.79219	0.733207	0.261162	calmodulin 9
AT3G04710.3	AT3G04710	284	218	190	169	442	380	301	287	4.2106	0.580587	0.261903	ankyrin repeat family protein
AT1G07770.1	AT1G07770	6185	6331	7214	6194	8281	9315	6995	8807	9.32572	0.239554	0.262586	ribosomal protein S15A
AT1G08290.1	AT1G08290	6	9	9	16	30	37	12	35	1.13359	1.35403	0.262586	WIP domain protein 3
AT3G27331.1	AT3G27331	0	0	0	0	0	2	2	16	-0.297064	5.25368	0.262586	Plant self-incompatibility protein S1 family
AT3G47560.1	AT3G47560	74	55	89	73	142	109	116	102	3.68946	0.590955	0.262586	alpha/beta-Hydrolases superfamily protein
AT1G15740.1	AT1G15740	269	292	296	212	306	463	359	428	5.67178	0.40715	0.263621	Leucine-rich repeat family protein
AT4G01070.1	AT4G01070	334	474	650	489	382	492	377	404	6.34305	-0.346053	0.263729	UDP-Glycosyltransferase superfamily protein
AT1G15380.2	AT1G15380	453	264	204	291	74	106	117	190	3.97356	-1.46685	0.263986	Lactoylglutathione lyase / glyoxalase I family protein
AT1G15385.1	AT1G15385	12	6	0	10	0	0	0	0	-1.13812	-5.94837	0.263986	unknown protein
AT1G30110.1	AT1G30110	242	99	196	155	356	235	318	309	4.08847	0.724469	0.263986	nudix hydrolase homolog 25
AT5G51730.1	AT5G51730	1	0	1	4	7	7	4	7	0.734211	1.85764	0.263986	RNA-binding (RRM/RBD/RNP motifs) family protein
AT1G01460.1	AT1G01460	0	0	0	0	7	9	0	2	-1.53502	5.1119	0.264032	Phosphatidylinositol-4-phosphate 5-kinase, core
AT1G09320.1	AT1G09320	109	132	138	97	162	182	164	247	3.78843	0.537383	0.264032	agenet domain-containing protein
AT2G30540.1	AT2G30540	187	96	102	129	70	66	56	96	3.08801	-0.97281	0.264032	Thioredoxin superfamily protein
AT3G46385.1	AT3G46385	0	0	0	0	0	0	1	7	2.69952	4.02793	0.264032	pseudogene
AT3G49550.1	AT3G49550	25	30	38	41	48	154	83	51	2.27457	1.18566	0.264032	unknown protein
AT5G45410.1	AT5G45410	300	193	267	299	204	188	206	248	4.94585	-0.436327	0.264032	unknown protein
AT1G30290.1	AT1G30290	12	7	14	12	32	28	19	41	1.09166	1.28918	0.264305	Tetratricopeptide repeat (TPR)-like superfamily protein
AT3G24080.2	AT3G24080	8379	8725	11925	9660	11099	14834	12948	13359	9.78144	0.32101	0.264305	KRR1 family protein
AT3G47030.1	AT3G47030	0	1	0	0	5	4	0	9	0.55759	3.4731	0.264728	F-box and associated interaction domains-containing protein
AT1G71530.1	AT1G71530	25	51	48	41	78	96	78	83	2.14601	0.895525	0.264734	Protein kinase superfamily protein
AT4G18090.1	AT4G18090	0	0	0	0	0	6	8	11	-0.977115	5.60614	0.264734	unknown protein
AT2G29910.1	AT2G29910	42	26	22	56	94	88	57	62	2.51051	0.909545	0.265516	F-box/RNI-like superfamily protein
AT5G39650.1	AT5G39650	12	10	19	10	0	3	0	2	-0.677535	-3.38765	0.265516	Protein of unknown function (DUF679)
AT1G11260.1	AT1G11260	7835	6417	4841	4964	8053	10122	9719	9750	9.97295	0.504138	0.265807	sugar transporter 1
AT5G66040.2	AT5G66040	401	378	589	520	355	517	276	442	6.43261	-0.373589	0.266366	sulfurtransferase protein 16
AT4G20320.2	AT4G20320	691	853	1435	697	794	598	497	767	5.46886	-0.563758	0.266955	CTP synthase family protein
AT1G69080.2	AT1G69080	55	84	101	128	147	165	119	155	4.02846	0.551876	0.267019	Adenine nucleotide alpha hydrolases-like superfamily protein
AT2G03530.1	AT2G03530	179	130	235	159	151	149	88	133	4.06528	-0.543933	0.267019	ureide permease 2
AT2G40860.1	AT2G40860	17	33	32	25	57	52	50	73	2.36518	0.992381	0.267019	protein kinase family protein / protein phosphatase 2C ( PP2C) family protein
AT3G14890.1	AT3G14890	173	179	306	142	125	179	156	129	3.89113	-0.540853	0.267019	phosphoesterase
AT1G04800.1	AT1G04800	443	437	608	683	386	535	382	488	7.68515	-0.398278	0.267391	glycine-rich protein
AT1G15040.2	AT1G15040	19	31	34	27	56	44	56	68	2.17713	0.902636	0.267391	Class I glutamine amidotransferase-like superfamily protein
AT1G30820.1	AT1G30820	669	839	707	693	969	1253	1028	1184	6.35613	0.470875	0.267391	CTP synthase family protein
AT1G32500.1	AT1G32500	118	96	162	148	104	92	84	116	4.11654	-0.509585	0.267391	non-intrinsic ABC protein 6
AT2G06530.1	AT2G06530	473	396	524	432	265	415	455	391	5.76971	-0.369517	0.267391	SNF7 family protein
AT3G03341.1	AT3G03341	0	0	0	0	0	6	0	9	-0.883872	4.8185	0.267391	unknown protein
AT3G09090.2	AT3G09090	152	83	102	93	83	102	67	45	3.14732	-0.660656	0.267391	defective in exine formation protein (DEX1)
AT3G43740.1	AT3G43740	0	4	4	0	0	0	0	0	1.98377	-4.14333	0.267391	Leucine-rich repeat (LRR) family protein
AT3G51420.1	AT3G51420	540	357	431	380	554	633	601	602	6.30406	0.363886	0.267391	strictosidine synthase-like 4
AT4G04210.1	AT4G04210	79	125	123	124	114	85	62	55	3.9083	-0.626733	0.267391	plant UBX domain containing protein 4
AT4G19490.1	AT4G19490	21	10	13	33	1	16	11	9	3.27438	-1.18451	0.267391	VPS54
AT5G11480.1	AT5G11480	404	313	380	414	442	714	508	503	5.68708	0.390378	0.267391	P-loop containing nucleoside triphosphate hydrolases superfamily protein
AT5G23660.1	AT5G23660	483	575	847	676	760	1053	837	1067	6.04883	0.412718	0.267391	homolog of Medicago truncatula MTN3
AT5G49990.1	AT5G49990	105	86	150	82	128	181	175	218	4.11217	0.622704	0.267391	Xanthine/uracil permease family protein
AT2G02810.1	AT2G02810	181	191	221	174	113	169	132	133	4.29996	-0.612421	0.268244	UDP-galactose transporter 1
AT2G47640.1	AT2G47640	318	292	375	304	292	275	242	279	4.8918	-0.358559	0.268244	Small nuclear ribonucleoprotein family protein
AT4G37610.1	AT4G37610	205	158	73	127	196	336	373	175	4.98136	0.796233	0.268244	BTB and TAZ domain protein 5
AT5G12890.1	AT5G12890	254	217	241	301	349	441	358	342	4.86175	0.433038	0.268244	UDP-Glycosyltransferase superfamily protein
AT3G52180.1	AT3G52180	185	156	253	159	134	207	101	159	4.61359	-0.452025	0.268759	dual specificity protein phosphatase (DsPTP1) family protein
AT4G08900.1	AT4G08900	84	67	74	88	58	49	32	66	2.97388	-0.740833	0.268759	arginase
AT3G49270.1	AT3G49270	24	35	78	48	25	14	12	17	3.42015	-1.50878	0.269151	unknown protein
AT3G45050.1	AT3G45050	186	171	213	227	277	284	236	334	5.01957	0.384253	0.269174	unknown protein
AT1G14860.1	AT1G14860	0	7	2	0	11	10	19	18	0.072668	2.48216	0.269452	nudix hydrolase homolog 18
AT1G78170.1	AT1G78170	66	44	90	62	120	157	81	78	3.23121	0.62035	0.269628	unknown protein
AT2G34655.1	AT2G34655	150	123	176	71	232	249	213	240	4.20941	0.73119	0.269628	unknown protein
AT2G07815.1	AT2G07815	28	44	53	55	11	24	8	23	1.79956	-1.59175	0.269972	unknown protein
AT1G07175.1	AT1G07175	4	9	9	10	2	1	3	1	-0.699771	-2.20631	0.270585	unknown protein
AT5G02100.1	AT5G02100	25	43	43	50	17	25	0	12	2.49223	-1.73861	0.270585	Oxysterol-binding family protein
AT1G10540.1	AT1G10540	142	111	103	81	185	173	155	212	3.53041	0.596523	0.270902	nucleobase-ascorbate transporter 8
AT4G33985.1	AT4G33985	37	39	45	59	9	43	12	41	2.49627	-0.94038	0.270902	Protein of unknown function (DUF1685)
AT3G26230.1	AT3G26230	7	1	5	2	6	15	8	24	2.50137	1.65004	0.271829	cytochrome P450, family 71, subfamily B, polypeptide 24
AT3G26235.1	AT3G26235	0	0	0	0	0	3	8	0	-1.07887	4.52053	0.271985	unknown protein
AT5G62140.1	AT5G62140	99	123	103	174	151	207	258	172	4.85059	0.54523	0.271991	unknown protein
AT4G30074.1	AT4G30074	2	5	12	0	0	0	0	0	-1.24169	-5.29132	0.272115	low-molecular-weight cysteine-rich 19
AT3G12890.1	AT3G12890	126	201	180	172	93	155	120	136	3.43187	-0.56527	0.272256	activator of spomin::LUC2
AT4G09012.1	AT4G09012	0	0	5	4	0	0	0	0	-0.826132	-4.26531	0.272256	Mitochondrial ribosomal protein L27
AT1G02630.1	AT1G02630	181	211	282	281	106	251	117	148	3.88911	-0.758844	0.273702	Nucleoside transporter family protein
AT3G10980.1	AT3G10980	82	80	110	109	133	172	128	139	3.70435	0.467768	0.274036	PLAC8 family protein
AT1G23350.1	AT1G23350	44	11	20	13	89	60	61	40	1.81036	1.39647	0.274493	Plant invertase/pectin methylesterase inhibitor superfamily protein
AT1G56520.2	AT1G56520	0	8	0	1	0	0	0	0	2.27014	-4.37859	0.274641	Disease resistance protein (TIR-NBS-LRR class) family
AT2G29980.1	AT2G29980	1563	1140	1734	1333	1741	2482	1592	2071	7.4049	0.325362	0.27466	fatty acid desaturase 3
AT1G13755.1	AT1G13755	25	9	11	6	4	5	7	0	1.13423	-1.75102	0.274806	Defensin-like (DEFL) family protein
AT1G62740.1	AT1G62740	222	288	358	308	235	306	190	240	4.97524	-0.400147	0.275883	stress-inducible protein, putative
AT1G08630.3	AT1G08630	62	58	60	23	89	116	99	109	2.19703	0.892053	0.276549	threonine aldolase 1
AT2G28520.1	AT2G28520	167	104	172	141	138	100	91	100	3.84606	-0.547618	0.276549	vacuolar proton ATPase A1
AT1G48760.2	AT1G48760	1672	1302	2152	1433	2442	2622	1850	2316	7.02619	0.381839	0.277374	delta-adaptin
AT2G21130.1	AT2G21130	1229	1362	2243	1558	1890	2363	1939	2586	7.23806	0.351104	0.277374	Cyclophilin-like peptidyl-prolyl cis-trans isomerase family protein
AT3G14172.2	AT3G14172	64	65	75	64	27	68	26	51	2.63831	-0.791578	0.277374	unknown protein
AT1G18400.1	AT1G18400	59	43	47	57	19	39	25	38	2.27358	-0.908325	0.278062	BR enhanced expression 1
AT2G24550.1	AT2G24550	693	438	315	425	312	424	320	382	6.38747	-0.533399	0.278062	unknown protein
AT4G14020.1	AT4G14020	3	4	18	3	11	15	11	29	2.82958	1.12617	0.278062	Rapid alkalinization factor (RALF) family protein
AT5G66170.1	AT5G66170	40	27	57	28	73	99	75	41	3.39747	0.822757	0.279063	sulfurtransferase 18
AT1G54790.2	AT1G54790	6	7	22	6	30	17	19	39	1.70809	1.27125	0.279591	GDSL-like Lipase/Acylhydrolase superfamily protein
AT2G23130.2	AT2G23130	4	8	7	1	5	0	0	0	2.07836	-2.00398	0.279591	arabinogalactan protein 17
AT1G35420.1	AT1G35420	231	206	239	220	175	174	201	148	5.24134	-0.467386	0.280112	alpha/beta-Hydrolases superfamily protein
AT1G15170.1	AT1G15170	17	26	30	24	6	27	7	6	2.32831	-1.22383	0.280332	MATE efflux family protein
AT1G21400.1	AT1G21400	26	15	16	34	27	44	75	74	2.92681	1.15622	0.280332	Thiamin diphosphate-binding fold (THDP-binding) superfamily protein
AT2G41310.1	AT2G41310	280	221	312	240	243	180	143	177	4.58124	-0.611667	0.280332	response regulator 3
AT4G03190.1	AT4G03190	309	307	500	384	287	324	256	316	4.63017	-0.449287	0.280332	GRR1-like protein 1
AT5G18980.1	AT5G18980	29	16	43	31	47	61	41	81	3.34495	0.835904	0.280332	ARM repeat superfamily protein
AT5G20000.1	AT5G20000	272	261	358	312	281	231	224	283	5.14953	-0.347964	0.280332	AAA-type ATPase family protein
AT1G27370.1	AT1G27370	252	275	426	268	418	644	378	407	4.56507	0.478327	0.280988	squamosa promoter binding protein-like 10
AT1G43170.5	AT1G43170	2984	3193	3938	3659	4227	5033	4339	4249	8.40676	0.259433	0.280988	ribosomal protein 1
AT1G68130.1	AT1G68130	209	199	269	215	276	424	254	418	4.7965	0.488087	0.280988	indeterminate(ID)-domain 14
AT3G45780.2	AT3G45780	327	392	453	392	349	306	344	309	5.92086	-0.363352	0.280988	phototropin 1
AT5G40290.1	AT5G40290	1	0	0	0	9	1	14	4	-0.867064	4.22164	0.280988	HD domain-containing metal-dependent phosphohydrolase family protein
AT5G52790.1	AT5G52790	4	5	0	5	0	0	0	0	-0.835281	-4.97524	0.280988	CBS domain-containing protein with a domain of unknown function (DUF21)
AT5G54240.1	AT5G54240	12	4	13	9	19	23	19	42	1.82455	1.31244	0.280988	Protein of unknown function (DUF1223)
AT1G33430.2	AT1G33430	0	0	0	0	2	9	0	5	-0.912443	4.91195	0.281138	Galactosyltransferase family protein
AT1G07220.1	AT1G07220	281	350	446	303	262	315	252	237	4.35452	-0.485155	0.281317	Arabidopsis thaliana protein of unknown function (DUF821)
AT2G01905.1	AT2G01905	0	1	0	0	0	5	0	13	-0.396101	3.43897	0.281869	cyclin J18
AT2G28460.1	AT2G28460	0	1	4	1	7	1	10	10	0.207107	2.08479	0.282098	Cysteine/Histidine-rich C1 domain family protein
AT5G55930.1	AT5G55930	23	45	29	24	76	60	28	92	3.20572	0.922833	0.283709	oligopeptide transporter 1
AT1G76420.1	AT1G76420	50	31	55	71	34	21	38	12	2.50761	-1.04498	0.283768	NAC (No Apical Meristem) domain transcriptional regulator superfamily protein
AT5G56480.1	AT5G56480	5	1	2	3	0	0	0	0	-1.6606	-4.58952	0.283804	Bifunctional inhibitor/lipid-transfer protein/seed storage 2S albumin superfamily protein
AT1G31720.1	AT1G31720	0	1	3	1	3	2	8	10	0.443886	2.01209	0.283826	Protein of unknown function (DUF1218)
AT1G25390.1	AT1G25390	34	21	23	17	55	60	76	18	2.79426	1.03552	0.285823	Protein kinase superfamily protein
AT1G51200.2	AT1G51200	110	58	61	38	33	37	40	59	2.77756	-0.794832	0.285823	A20/AN1-like zinc finger family protein
AT2G31540.1	AT2G31540	0	3	0	9	0	0	0	0	-1.29846	-4.72748	0.285823	GDSL-like Lipase/Acylhydrolase superfamily protein
AT3G10020.2	AT3G10020	1734	1254	1025	1017	2115	2120	1818	2422	7.43284	0.609077	0.285823	unknown protein
AT3G14550.1	AT3G14550	55	35	49	29	18	10	35	18	2.50484	-1.12353	0.285823	geranylgeranyl pyrophosphate synthase 3
AT3G22660.1	AT3G22660	187	250	322	271	386	375	365	383	4.75957	0.445488	0.285823	rRNA processing protein-related
AT3G27690.1	AT3G27690	298	203	197	319	210	172	138	194	6.13808	-0.639682	0.285823	photosystem II light harvesting complex gene 2.3
AT2G32390.3	AT2G32390	26	8	17	12	3	11	4	2	0.56106	-1.77301	0.286716	glutamate receptor 3.5
AT5G25040.2	AT5G25040	14	19	19	21	30	53	42	50	2.94427	1.12461	0.286808	Major facilitator superfamily protein
AT1G03770.2	AT1G03770	59	36	48	49	33	33	16	12	1.37809	-1.15054	0.287797	RING 1B
AT1G17330.1	AT1G17330	19	29	47	40	57	43	51	96	3.03998	0.766325	0.28805	Metal-dependent phosphohydrolase
AT2G43640.3	AT2G43640	192	194	220	216	319	340	265	263	4.7065	0.410372	0.28805	Signal recognition particle, SRP9/SRP14 subunit
AT3G55910.1	AT3G55910	0	1	7	13	1	0	0	0	-0.681969	-3.87557	0.28805	unknown protein
AT5G29000.4	AT5G29000	4	9	4	5	0	1	1	0	-1.23463	-3.30978	0.28805	Homeodomain-like superfamily protein
AT5G58260.2	AT5G58260	138	78	129	97	189	221	93	184	4.78553	0.502842	0.28805	oxidoreductases, acting on NADH or NADPH, quinone or similar compound as acceptor
AT3G13620.1	AT3G13620	52	53	43	43	28	38	21	42	2.16524	-0.711461	0.288368	Amino acid permease family protein
AT5G16350.1	AT5G16350	4	12	30	28	11	11	3	3	2.01233	-1.47503	0.288582	O-acyltransferase (WSD1-like) family protein
AT3G06980.1	AT3G06980	228	238	300	298	291	340	433	523	5.49767	0.466684	0.288794	DEA(D/H)-box RNA helicase family protein
AT1G08005.1	AT1G08005	0	0	0	0	4	1	1	4	-1.53187	4.34221	0.289066	unknown protein
AT3G22120.1	AT3G22120	13389	10897	10248	11938	14246	19202	15417	16102	11.0701	0.346883	0.289066	cell wall-plasma membrane linker protein
AT5G63340.1	AT5G63340	0	0	0	0	9	0	0	4	-1.40444	4.72671	0.289066	unknown protein
AT2G20270.2	AT2G20270	194	202	244	232	337	339	239	292	4.99968	0.348737	0.289807	Thioredoxin superfamily protein
AT5G06260.1	AT5G06260	148	133	132	147	123	94	132	68	3.86202	-0.526677	0.289807	TLD-domain containing nucleolar protein
AT1G68650.1	AT1G68650	443	430	515	432	367	373	380	402	4.97489	-0.371327	0.290061	Uncharacterized protein family (UPF0016)
AT1G75350.1	AT1G75350	3248	2868	3514	3395	4161	4587	3888	4470	9.17194	0.273846	0.290061	Ribosomal protein L31
AT1G78670.1	AT1G78670	8	12	32	24	47	44	27	24	2.94942	0.805515	0.290061	gamma-glutamyl hydrolase 3
AT2G33810.1	AT2G33810	2018	2169	3024	1912	2926	3757	3067	3237	7.29481	0.397155	0.290061	squamosa promoter binding protein-like 3
AT4G26990.1	AT4G26990	35	15	81	37	64	94	74	86	2.91997	0.843088	0.290061	unknown protein
AT4G15920.1	AT4G15920	363	257	349	385	277	331	209	271	5.55883	-0.441827	0.290563	Nodulin MtN3 family protein
AT4G22240.1	AT4G22240	3364	3403	4740	3890	3416	3799	2951	3859	8.05846	-0.249875	0.290563	Plastid-lipid associated protein PAP / fibrillin family protein
AT5G41040.1	AT5G41040	6	1	0	1	0	0	0	0	1.14622	-4.17471	0.290563	HXXXD-type acyl-transferase family protein
AT3G53610.1	AT3G53610	549	405	759	492	440	498	440	412	5.60709	-0.398538	0.290688	RAB GTPase homolog 8
AT1G20690.1	AT1G20690	72	82	66	100	125	124	137	153	3.419	0.626811	0.291251	SWI-SNF-related chromatin binding protein
AT2G23060.2	AT2G23060	200	264	269	262	173	178	167	179	3.6096	-0.632133	0.292194	Acyl-CoA N-acyltransferases (NAT) superfamily protein
AT3G10720.2	AT3G10720	23	34	37	54	85	69	35	74	3.41104	0.701862	0.292194	Plant invertase/pectin methylesterase inhibitor superfamily
AT5G02380.1	AT5G02380	53124	59550	85210	76021	55174	69434	51202	62604	12.2725	-0.314563	0.292728	metallothionein 2B
AT5G14370.1	AT5G14370	2028	1914	2354	1922	1753	2111	1683	1833	7.52557	-0.275873	0.294578	CCT motif family protein
AT1G24822.1	AT1G24822	4462	3379	4457	3713	3648	3895	2743	2864	8.35228	-0.40405	0.29512	unknown protein
AT1G25097.1	AT1G25097	4462	3379	4457	3713	3648	3895	2743	2864	8.35228	-0.40405	0.29512	unknown protein
AT1G53730.2	AT1G53730	132	108	153	99	70	115	87	106	3.8188	-0.503279	0.29512	STRUBBELIG-receptor family 6
AT1G75110.1	AT1G75110	44	48	61	50	41	28	15	8	1.33587	-1.24166	0.29512	Nucleotide-diphospho-sugar transferase family protein
AT3G59780.1	AT3G59780	169	142	230	124	275	311	234	237	4.94985	0.560212	0.29512	Rhodanese/Cell cycle control phosphatase superfamily protein
AT5G23140.1	AT5G23140	186	140	249	199	251	261	242	306	4.59735	0.347071	0.29512	nuclear-encoded CLP protease P7
AT5G57120.1	AT5G57120	7656	7676	9591	8033	9660	12888	10447	11529	9.61134	0.313339	0.295734	unknown protein
AT1G22890.1	AT1G22890	62	30	21	10	83	57	58	79	4.1654	1.02467	0.296695	unknown protein
AT1G55000.3	AT1G55000	179	131	130	118	79	80	114	132	3.98215	-0.584433	0.296695	peptidoglycan-binding LysM domain-containing protein
AT2G35765.1	AT2G35765	19	16	15	9	46	40	23	53	1.12534	1.3061	0.296695	unknown protein
AT3G01910.2	AT3G01910	680	670	726	681	550	682	565	636	6.19066	-0.306403	0.296695	sulfite oxidase
AT3G51270.2	AT3G51270	454	391	486	457	659	574	562	612	5.44422	0.317407	0.296695	protein serine/threonine kinases;ATP binding;catalytics
AT3G51430.2	AT3G51430	34	30	49	54	17	26	30	30	2.98414	-0.800325	0.296695	Calcium-dependent phosphotriesterase superfamily protein
AT3G60000.1	AT3G60000	4	4	0	2	0	0	0	0	-1.40983	-4.50743	0.296695	Family of unknown function (DUF566)
AT5G01330.1	AT5G01330	1	8	0	0	0	0	0	0	-0.693881	-4.38787	0.296695	pyruvate decarboxylase-3
AT5G50990.1	AT5G50990	7	8	14	3	15	41	24	21	1.00981	1.52279	0.296695	Tetratricopeptide repeat (TPR)-like superfamily protein
AT5G03080.1	AT5G03080	272	254	291	256	220	218	204	240	5.01886	-0.401753	0.297499	Phosphatidic acid phosphatase (PAP2) family protein
AT2G18710.1	AT2G18710	161	196	194	163	200	265	244	330	4.85221	0.411428	0.298185	SECY homolog 1
AT2G25370.2	AT2G25370	11	2	2	0	0	0	0	0	-0.526493	-5.05243	0.298264	RING/U-box superfamily protein
AT5G20160.1	AT5G20160	1155	1289	1771	1542	1774	2071	1632	2193	7.12229	0.298119	0.298264	Ribosomal protein L7Ae/L30e/S12e/Gadd45 family protein
AT1G07440.1	AT1G07440	376	269	442	322	524	487	440	570	5.69847	0.413101	0.298418	NAD(P)-binding Rossmann-fold superfamily protein
AT1G24996.1	AT1G24996	4468	3385	4462	3723	3656	3905	2746	2870	8.35537	-0.403599	0.298418	unknown protein
AT2G36290.1	AT2G36290	131	166	197	195	102	154	137	126	3.92512	-0.525106	0.29963	alpha/beta-Hydrolases superfamily protein
AT5G53530.1	AT5G53530	381	296	451	362	279	358	247	345	5.34191	-0.398826	0.29963	vacuolar protein sorting 26A
AT1G17235.1	AT1G17235	0	0	0	0	3	1	13	0	-1.44411	5.18931	0.299669	ROTUNDIFOLIA like 11
AT2G22055.1	AT2G22055	4	0	0	0	7	18	9	15	-0.467636	3.28273	0.299685	RALF-like 15
AT1G25400.1	AT1G25400	121	101	65	49	94	150	216	155	4.98509	0.73837	0.299835	unknown protein
AT1G75410.1	AT1G75410	124	118	146	143	211	155	210	237	4.61282	0.51058	0.29984	BEL1-like homeodomain 3
AT5G49940.2	AT5G49940	286	270	334	307	281	267	254	224	5.54294	-0.332529	0.29984	NIFU-like protein 2
AT3G21550.1	AT3G21550	247	196	340	358	419	456	368	396	5.64167	0.41751	0.300272	DUF679 domain membrane protein 2
AT2G36080.2	AT2G36080	8	2	6	11	11	13	31	22	1.75624	1.41289	0.301978	AP2/B3-like transcriptional factor family protein
AT2G18660.1	AT2G18660	4	1	1	0	0	7	1	26	2.5981	2.21449	0.30337	plant natriuretic peptide A
AT1G63522.1	AT1G63522	0	0	0	0	0	17	5	0	-0.975326	5.3678	0.303741	Defensin-like (DEFL) family protein
AT2G16530.1	AT2G16530	37	32	22	37	10	35	12	16	2.77338	-0.976856	0.303789	3-oxo-5-alpha-steroid 4-dehydrogenase family protein
AT3G24030.1	AT3G24030	98	94	142	110	88	96	66	68	3.78939	-0.591974	0.303789	hydroxyethylthiazole kinase family protein
AT2G30820.2	AT2G30820	6	10	2	0	0	0	0	1	-1.05232	-3.80946	0.304347	unknown protein
AT3G26770.1	AT3G26770	0	3	8	0	0	0	0	0	-0.120571	-4.52564	0.305634	NAD(P)-binding Rossmann-fold superfamily protein
AT2G26440.1	AT2G26440	271	221	296	298	198	212	185	241	4.80033	-0.494826	0.307006	Plant invertase/pectin methylesterase inhibitor superfamily
AT4G17170.1	AT4G17170	440	353	574	500	292	409	428	410	6.09365	-0.382329	0.307548	RAB GTPase homolog B1C
AT5G41050.1	AT5G41050	338	314	348	252	384	430	410	470	5.52288	0.314057	0.307548	Pollen Ole e 1 allergen and extensin family protein
AT3G21690.1	AT3G21690	446	417	501	408	681	744	500	538	6.28026	0.351804	0.30842	MATE efflux family protein
AT3G58490.1	AT3G58490	66	71	95	77	75	43	38	62	3.18012	-0.610069	0.3087	Phosphatidic acid phosphatase (PAP2) family protein
AT4G08870.2	AT4G08870	39	43	87	78	46	48	31	37	3.1594	-0.706715	0.3087	Arginase/deacetylase superfamily protein
AT1G48950.1	AT1G48950	63	32	44	39	26	32	21	32	1.97335	-0.810449	0.309183	C3HC zinc finger-like
AT1G63270.1	AT1G63270	17	10	35	27	34	78	30	66	2.04968	1.09875	0.309183	non-intrinsic ABC protein 10
AT1G69760.1	AT1G69760	598	536	825	544	731	914	751	939	6.56534	0.300947	0.309464	unknown protein
AT1G68640.1	AT1G68640	0	0	2	2	8	2	1	12	-0.0592014	2.28854	0.309874	bZIP transcription factor family protein
AT3G21260.1	AT3G21260	32	69	28	37	50	84	78	82	3.6744	0.66951	0.310182	Glycolipid transfer protein (GLTP) family protein
AT5G66120.2	AT5G66120	268	263	317	274	231	249	199	271	5.03389	-0.362279	0.310485	3-dehydroquinate synthase, putative
AT5G62070.1	AT5G62070	171	124	271	192	103	207	138	136	4.3529	-0.484782	0.311011	IQ-domain 23
AT1G72930.1	AT1G72930	655	531	593	519	447	481	515	452	7.11643	-0.393651	0.311879	toll/interleukin-1 receptor-like
AT3G22060.1	AT3G22060	179	194	76	172	176	250	298	361	5.84973	0.647464	0.311956	Receptor-like protein kinase-related family protein
AT3G55710.1	AT3G55710	158	106	162	95	229	225	145	314	4.0408	0.681059	0.311956	UDP-Glycosyltransferase superfamily protein
AT3G57520.1	AT3G57520	4343	3994	3700	4130	4848	6311	5711	6480	8.35953	0.396551	0.311956	seed imbibition 2
AT5G57655.1	AT5G57655	1634	1335	1300	1262	1711	2167	1870	2144	7.2993	0.378455	0.311956	xylose isomerase family protein
AT1G12710.1	AT1G12710	49	31	56	35	57	81	86	62	2.98154	0.638283	0.314263	phloem protein 2-A12
AT4G00420.3	AT4G00420	112	76	90	71	145	167	109	132	3.83906	0.532699	0.314263	Double-stranded RNA-binding domain (DsRBD)-containing protein
AT4G39800.1	AT4G39800	1462	1406	2626	1876	1326	1521	1272	1484	7.67763	-0.492496	0.315019	myo-inositol-1-phosphate synthase 1
AT3G19620.1	AT3G19620	9	5	6	0	10	13	40	17	0.88088	1.8967	0.316615	Glycosyl hydrolase family protein
AT1G79910.1	AT1G79910	22	27	36	30	52	85	57	48	3.09636	0.95075	0.316793	Regulator of Vps4 activity in the MVB pathway protein
AT2G05185.1	AT2G05185	131	91	156	150	101	63	95	83	3.66141	-0.710163	0.316861	unknown protein
AT2G01735.1	AT2G01735	55	57	87	34	37	34	30	25	2.3568	-0.982676	0.317259	RING-finger protein for embryogenesis
AT3G25160.1	AT3G25160	0	0	1	0	11	2	3	1	-1.1221	3.52337	0.317779	ER lumen protein retaining receptor family protein
AT1G30020.1	AT1G30020	1	13	6	22	0	4	3	2	0.0399697	-2.3094	0.318341	Protein of unknown function, DUF538
AT5G15400.1	AT5G15400	174	143	193	140	119	155	100	131	3.95071	-0.489897	0.318341	U-box domain-containing protein
AT5G44570.1	AT5G44570	0	4	4	6	0	0	0	0	-0.163322	-4.91094	0.318482	unknown protein
AT3G22890.1	AT3G22890	926	1013	1351	1307	869	1082	822	1096	7.70501	-0.367839	0.318585	ATP sulfurylase 1
AT1G16590.1	AT1G16590	17	10	38	23	15	5	7	7	0.772198	-1.41191	0.318639	DNA-binding HORMA family protein
AT3G06360.1	AT3G06360	52	53	67	66	38	34	35	30	2.21327	-0.899619	0.318778	arabinogalactan protein 27
AT5G52830.1	AT5G52830	138	101	210	178	94	123	83	122	3.41175	-0.679373	0.319266	WRKY DNA-binding protein 27
AT1G03940.1	AT1G03940	93	74	97	79	95	184	140	136	3.28159	0.566706	0.319328	HXXXD-type acyl-transferase family protein
AT4G21390.1	AT4G21390	0	26	13	5	0	5	3	0	0.666548	-2.5592	0.319328	S-locus lectin protein kinase family protein
AT1G71960.1	AT1G71960	59	72	78	88	116	115	103	150	3.74659	0.582077	0.319806	ATP-binding casette family G25
AT3G24180.1	AT3G24180	170	108	200	212	110	168	127	121	4.01055	-0.502719	0.320017	Beta-glucosidase, GBA2 type family protein
AT1G20270.1	AT1G20270	107	120	119	113	67	101	73	111	3.44691	-0.519169	0.320061	2-oxoglutarate (2OG) and Fe(II)-dependent oxygenase superfamily protein
AT2G01710.1	AT2G01710	244	252	302	283	209	293	169	231	4.8104	-0.392979	0.32129	Chaperone DnaJ-domain superfamily protein
AT2G18250.1	AT2G18250	109	107	149	83	78	91	47	104	3.54404	-0.614644	0.32129	4-phosphopantetheine adenylyltransferase
AT3G04630.1	AT3G04630	274	209	255	197	200	194	146	188	4.55906	-0.48478	0.32129	WVD2-like 1
AT3G27329.1	AT3G27329	0	0	0	0	0	2	2	12	-0.46421	4.94689	0.32129	Plant self-incompatibility protein S1 family
AT3G50550.2	AT3G50550	143	168	184	121	105	117	74	151	4.03792	-0.598292	0.32129	unknown protein
AT5G43620.1	AT5G43620	22	6	18	15	27	43	38	32	1.55376	1.08493	0.32129	Pre-mRNA cleavage complex II
AT5G58620.1	AT5G58620	109	144	182	95	90	89	62	96	2.83515	-0.771736	0.32129	zinc finger (CCCH-type) family protein
AT4G16190.1	AT4G16190	1030	923	1073	972	1297	1317	1306	1286	7.93064	0.266425	0.322157	Papain family cysteine protease
AT5G01830.1	AT5G01830	10	2	11	3	17	13	15	27	1.749	1.35838	0.322526	ARM repeat superfamily protein
AT2G19270.1	AT2G19270	141	162	179	123	125	120	95	137	4.13609	-0.466388	0.322869	unknown protein
AT5G36160.1	AT5G36160	86	67	74	75	121	137	130	85	4.40798	0.531732	0.324404	Tyrosine transaminase family protein
AT2G32940.1	AT2G32940	0	0	6	1	12	5	23	5	-0.278636	2.64962	0.324935	Argonaute family protein
AT1G67645.1	AT1G67645	3	6	1	3	0	0	0	0	-1.34565	-4.87226	0.325812	pseudogene
AT2G28960.1	AT2G28960	5	2	4	3	13	23	5	13	-0.737174	1.76101	0.325812	Leucine-rich repeat protein kinase family protein
AT3G02790.1	AT3G02790	233	209	205	221	323	371	301	276	5.08794	0.423494	0.325812	zinc finger (C2H2 type) family protein
AT3G54680.1	AT3G54680	34	37	86	62	70	97	96	89	3.28593	0.593723	0.325812	proteophosphoglycan-related
AT4G24590.1	AT4G24590	213	111	196	108	117	163	78	116	4.18928	-0.535651	0.325812	unknown protein
AT5G20820.1	AT5G20820	5	1	11	4	1	1	0	4	0.869962	-1.81609	0.325812	SAUR-like auxin-responsive protein family
AT5G39970.1	AT5G39970	1	8	10	0	0	0	0	1	-0.559496	-3.79358	0.325812	catalytics
AT1G26230.2	AT1G26230	47	31	59	67	56	134	66	90	3.21056	0.62824	0.327433	TCP-1/cpn60 chaperonin family protein
AT2G35690.1	AT2G35690	17	15	43	24	50	54	41	50	2.5494	0.886438	0.327433	acyl-CoA oxidase 5
AT3G58610.2	AT3G58610	2726	2805	3398	3170	3575	4416	3426	4283	8.6776	0.252478	0.327433	ketol-acid reductoisomerase
AT2G32190.1	AT2G32190	89	69	95	97	68	58	48	55	3.66806	-0.722763	0.328066	unknown protein
AT3G54340.1	AT3G54340	572	469	565	669	479	385	367	278	4.60554	-0.696548	0.328066	K-box region and MADS-box transcription factor family protein
AT4G00700.1	AT4G00700	0	0	0	0	0	4	9	0	-0.0353273	4.75591	0.328066	C2 calcium/lipid-binding plant phosphoribosyltransferase family protein
AT5G14800.1	AT5G14800	574	506	572	476	798	627	675	837	5.89437	0.349652	0.328066	pyrroline-5- carboxylate (P5C) reductase
AT4G25650.2	AT4G25650	188	148	167	158	135	116	134	141	4.92064	-0.444207	0.328342	ACD1-like
AT1G61720.1	AT1G61720	4	8	18	10	28	50	21	36	2.04897	1.63091	0.329343	NAD(P)-binding Rossmann-fold superfamily protein
AT4G32040.1	AT4G32040	296	324	340	269	354	492	391	448	5.57958	0.325916	0.330046	KNOTTED1-like homeobox gene 5
AT2G36030.1	AT2G36030	5	2	12	5	3	2	0	0	-0.256596	-2.22862	0.330735	unknown protein
AT1G23050.1	AT1G23050	363	314	88	171	395	516	323	530	5.83937	0.721814	0.331168	hydroxyproline-rich glycoprotein family protein
AT1G33270.2	AT1G33270	80	82	174	78	71	80	65	66	2.68969	-0.642857	0.331168	Acyl transferase/acyl hydrolase/lysophospholipase superfamily protein
AT4G10040.1	AT4G10040	330	307	476	403	257	390	279	295	5.43442	-0.427472	0.331168	cytochrome c-2
AT5G62190.1	AT5G62190	2104	2135	2277	1964	2592	3622	2572	2883	7.46542	0.327346	0.331168	DEAD box RNA helicase (PRH75)
AT5G64740.1	AT5G64740	2897	2241	3378	2674	2481	2780	2391	2723	8.69638	-0.220482	0.331168	cellulose synthase 6
AT1G01370.1	AT1G01370	46	55	46	41	92	79	156	107	2.57729	1.10377	0.332556	Histone superfamily protein
AT3G20390.1	AT3G20390	878	888	1241	1057	823	867	751	845	6.52311	-0.415594	0.332556	endoribonuclease L-PSP family protein
AT4G33660.1	AT4G33660	274	290	322	297	336	466	448	401	5.78472	0.362429	0.332556	unknown protein
AT4G35725.1	AT4G35725	0	0	0	0	1	0	0	8	0.773223	4.16745	0.332556	unknown protein
AT4G37530.1	AT4G37530	2	0	4	3	18	1	5	7	2.93773	1.671	0.332556	Peroxidase superfamily protein
AT5G05640.1	AT5G05640	35	29	43	36	24	23	15	28	1.94515	-0.784372	0.332556	nucleoprotein-related
AT1G75890.2	AT1G75890	26	26	28	17	56	52	68	108	1.83825	1.42243	0.335547	GDSL-like Lipase/Acylhydrolase superfamily protein
AT2G02930.1	AT2G02930	8	15	10	14	5	0	10	4	2.01534	-1.37597	0.336035	glutathione S-transferase F3
AT5G21100.1	AT5G21100	200	184	173	174	252	327	191	286	5.18155	0.387649	0.337443	Plant L-ascorbate oxidase
AT1G16400.1	AT1G16400	32	12	27	43	12	27	1	13	2.13282	-1.25997	0.337445	cytochrome P450, family 79, subfamily F, polypeptide 2
AT2G34700.1	AT2G34700	0	2	0	8	0	0	0	0	1.22668	-4.46688	0.337445	Pollen Ole e 1 allergen and extensin family protein
AT3G13850.1	AT3G13850	0	0	0	0	9	2	0	0	-0.98682	4.49721	0.337445	LOB domain-containing protein 22
AT4G39600.1	AT4G39600	8	1	10	8	32	7	19	31	0.691307	1.64256	0.337445	Galactose oxidase/kelch repeat superfamily protein
AT4G00240.1	AT4G00240	1	2	1	2	14	2	5	8	0.106306	2.0871	0.33759	phospholipase D beta 2
AT2G43830.1	AT2G43830	8	8	16	5	22	48	9	42	1.68064	1.54802	0.33786	pseudogene
AT1G78490.1	AT1G78490	747	780	1136	1065	663	888	631	901	6.18603	-0.393334	0.339068	cytochrome P450, family 708, subfamily A, polypeptide 3
AT1G07570.2	AT1G07570	78	60	99	90	147	148	115	104	3.45851	0.546039	0.339392	Protein kinase superfamily protein
AT3G27850.1	AT3G27850	7723	6233	8428	7087	9028	10754	9238	9608	10.4491	0.274921	0.339542	ribosomal protein L12-C
AT4G10470.1	AT4G10470	61	54	39	39	65	91	129	86	2.7577	0.818721	0.339542	unknown protein
AT4G24740.2	AT4G24740	192	191	268	160	163	185	139	165	4.20016	-0.429873	0.340491	FUS3-complementing gene 2
AT1G21720.1	AT1G21720	672	663	1012	864	723	682	679	743	6.39523	-0.284562	0.340699	proteasome beta subunit C1
AT2G01670.1	AT2G01670	222	185	251	161	259	308	336	259	5.64422	0.398877	0.340699	nudix hydrolase homolog 17
AT2G45470.1	AT2G45470	3243	2882	4108	3282	2874	3482	2446	3096	8.41371	-0.303123	0.340699	FASCICLIN-like arabinogalactan protein 8
AT3G02500.1	AT3G02500	40	35	42	24	13	31	25	22	3.61835	-0.756001	0.340699	unknown protein
AT3G24900.1	AT3G24900	1	3	3	0	7	13	1	10	1.01112	1.91337	0.340699	receptor like protein 39
AT3G52430.1	AT3G52430	112	136	223	127	202	270	198	292	4.88825	0.574063	0.340699	alpha/beta-Hydrolases superfamily protein
AT5G15530.1	AT5G15530	383	389	532	569	327	368	253	413	4.99801	-0.58259	0.340699	biotin carboxyl carrier protein 2
AT5G47370.1	AT5G47370	242	204	334	201	200	201	192	201	5.84227	-0.407148	0.340699	Homeobox-leucine zipper protein 4 (HB-4) / HD-ZIP protein
AT5G57670.2	AT5G57670	0	5	7	2	31	28	3	12	0.720968	2.24335	0.340699	Protein kinase superfamily protein
AT4G38960.3	AT4G38960	84	99	99	117	61	31	69	76	3.23436	-0.850022	0.341671	B-box type zinc finger family protein
AT1G33340.1	AT1G33340	4	0	0	10	1	0	0	1	0.171148	-2.64844	0.342672	ENTH/ANTH/VHS superfamily protein
AT1G72540.1	AT1G72540	69	78	118	76	50	69	39	52	2.37385	-0.817306	0.342672	Protein kinase superfamily protein
AT1G01640.1	AT1G01640	74	57	72	34	100	112	76	118	3.05367	0.645579	0.343633	BTB/POZ domain-containing protein
AT1G80900.1	AT1G80900	116	162	159	144	96	104	92	133	3.40491	-0.578223	0.343633	magnesium transporter 1
AT3G25220.1	AT3G25220	359	410	559	448	384	397	347	419	5.21964	-0.309669	0.343633	FK506-binding protein 15 kD-1
AT3G48230.1	AT3G48230	15	30	14	8	3	1	4	3	-0.383946	-2.67989	0.343633	Protein of Unknown Function (DUF239)
AT4G00110.1	AT4G00110	54	15	33	72	18	32	11	32	2.29029	-1.04646	0.344261	UDP-D-glucuronate 4-epimerase 3
AT4G00970.1	AT4G00970	14	7	15	10	8	4	2	3	1.38256	-1.51007	0.344261	cysteine-rich RLK (RECEPTOR-like protein kinase) 41
AT2G16365.1	AT2G16365	15	9	11	8	25	41	22	22	1.91688	1.20706	0.345466	F-box family protein
AT5G14410.1	AT5G14410	680	516	498	538	749	833	679	827	6.04707	0.334127	0.345466	unknown protein
AT4G32300.1	AT4G32300	42	27	43	44	75	73	59	50	3.35255	0.609148	0.346785	S-domain-2 5
AT5G65740.2	AT5G65740	55	37	46	33	41	105	80	91	2.70916	0.751347	0.346785	zinc ion binding
AT1G49350.1	AT1G49350	22	40	71	55	119	108	77	48	2.86489	0.817571	0.346799	pfkB-like carbohydrate kinase family protein
AT5G17380.1	AT5G17380	194	210	272	234	153	237	179	170	4.60781	-0.419609	0.346872	Thiamine pyrophosphate dependent pyruvate decarboxylase family protein
AT4G13395.1	AT4G13395	10	15	18	16	28	48	55	41	1.65255	1.43118	0.346983	ROTUNDIFOLIA like 12
AT4G21650.1	AT4G21650	188	236	391	246	387	458	397	480	4.1846	0.597913	0.347077	Subtilase family protein
AT2G16730.1	AT2G16730	0	2	0	2	2	4	9	9	-0.92184	2.32583	0.34793	glycosyl hydrolase family 35 protein
AT1G04770.1	AT1G04770	346	177	191	160	123	155	111	258	5.23859	-0.586807	0.348153	Tetratricopeptide repeat (TPR)-like superfamily protein
AT1G63670.1	AT1G63670	262	223	314	285	231	270	147	194	4.30896	-0.488757	0.348365	Protein of unknown function (DUF3741)
AT1G51680.3	AT1G51680	1238	1347	1672	1800	1108	1273	1067	1358	7.8392	-0.452004	0.348791	4-coumarate:CoA ligase 1
AT1G33500.1	AT1G33500	0	0	0	0	2	8	0	7	-1.06221	4.99688	0.348937	unknown protein
AT3G13600.1	AT3G13600	0	3	7	6	0	0	1	0	-0.668912	-3.4942	0.34987	calmodulin-binding family protein
AT3G13130.1	AT3G13130	3	8	6	6	0	4	0	0	0.115411	-2.56706	0.350207	unknown protein
AT2G40610.1	AT2G40610	150	157	167	181	80	160	59	173	4.60473	-0.633655	0.350333	expansin A8
AT3G08940.2	AT3G08940	767	593	728	733	564	709	516	578	7.8886	-0.379543	0.350333	light harvesting complex photosystem II
AT2G33430.1	AT2G33430	1059	967	1286	1229	1385	1573	1224	1773	7.15981	0.269686	0.350395	differentiation and greening-like 1
AT4G35940.2	AT4G35940	168	205	202	222	278	345	294	251	4.59096	0.429339	0.350462	unknown protein
AT1G51080.1	AT1G51080	378	381	438	464	595	563	544	624	5.81504	0.370731	0.352771	unknown protein
AT5G05510.1	AT5G05510	7	8	6	3	18	27	14	8	0.31045	1.32277	0.352771	Mad3/BUB1 homology region 1
AT5G18430.1	AT5G18430	5	3	0	5	11	24	6	21	1.37207	2.01379	0.352771	GDSL-like Lipase/Acylhydrolase superfamily protein
AT5G50750.1	AT5G50750	1	0	0	1	0	1	7	15	0.800837	3.11809	0.353405	reversibly glycosylated polypeptide 4
AT1G02420.1	AT1G02420	0	1	0	2	3	3	4	10	-0.82256	2.42321	0.353502	Pentatricopeptide repeat (PPR) superfamily protein
AT5G11590.1	AT5G11590	0	1	3	2	8	8	0	12	0.494203	2.00656	0.353923	Integrase-type DNA-binding superfamily protein
AT5G50720.1	AT5G50720	78	95	80	64	39	85	16	47	2.98959	-0.942928	0.354358	HVA22 homologue E
AT1G75000.1	AT1G75000	12	6	16	6	21	55	18	6	1.70376	1.18074	0.354666	GNS1/SUR4 membrane protein family
AT1G14420.1	AT1G14420	1	2	0	0	2	31	13	1	-0.568775	3.54514	0.356657	Pectate lyase family protein
AT1G17170.1	AT1G17170	18	19	34	20	3	9	4	30	3.35276	-1.1127	0.356657	glutathione S-transferase TAU 24
AT1G56060.1	AT1G56060	30	11	17	22	7	10	5	17	3.02407	-1.17012	0.356657	unknown protein
AT2G17040.1	AT2G17040	4	2	1	2	6	0	28	0	2.16126	1.83859	0.356657	NAC domain containing protein 36
AT2G23080.2	AT2G23080	124	107	135	105	98	122	68	65	3.32872	-0.541848	0.356657	Protein kinase superfamily protein
AT3G13580.3	AT3G13580	640	564	738	545	933	978	730	762	5.95393	0.335681	0.356657	Ribosomal protein L30/L7 family protein
AT4G24415.2	AT4G24415	11	0	0	2	0	0	0	0	-0.856429	-4.85789	0.356657	MIR824a; miRNA
AT5G42540.1	AT5G42540	370	313	408	389	543	631	445	526	5.35405	0.413096	0.356657	exoribonuclease 2
AT3G12750.1	AT3G12750	493	561	793	785	435	569	503	564	5.59584	-0.455897	0.356756	zinc transporter 1 precursor
AT3G26320.1	AT3G26320	0	0	5	10	0	0	0	0	-0.630406	-4.9584	0.357054	cytochrome P450, family 71, subfamily B, polypeptide 36
AT4G19460.1	AT4G19460	201	260	326	262	157	210	116	237	3.46641	-0.676882	0.357209	UDP-Glycosyltransferase superfamily protein
AT5G24860.1	AT5G24860	33	34	22	46	58	71	77	59	2.60355	0.843976	0.357233	flowering promoting factor 1
AT1G03470.1	AT1G03470	274	361	372	339	251	334	245	211	4.77566	-0.495748	0.357466	Kinase interacting (KIP1-like) family protein
AT1G68580.2	AT1G68580	315	292	326	260	421	431	356	457	5.49977	0.356245	0.357466	agenet domain-containing protein / bromo-adjacent homology (BAH) domain-containing protein
AT1G73150.1	AT1G73150	27	16	38	41	73	45	89	79	2.48928	1.15776	0.357466	global transcription factor group E3
AT4G33150.1	AT4G33150	455	370	300	278	557	660	520	471	6.02703	0.514266	0.357466	lysine-ketoglutarate reductase/saccharopine dehydrogenase bifunctional enzyme
AT5G22000.1	AT5G22000	1337	1057	1244	1146	1356	1769	1524	1632	7.3453	0.26808	0.357466	RING-H2 group F2A
AT1G53450.1	AT1G53450	106	130	134	148	201	229	151	195	3.8685	0.453776	0.358195	unknown protein
AT1G58170.1	AT1G58170	11	20	36	33	7	10	7	19	1.1763	-1.31983	0.358195	Disease resistance-responsive (dirigent-like protein) family protein
AT4G32110.1	AT4G32110	3	6	5	4	3	0	0	0	1.38303	-2.50099	0.358195	Beta-1,3-N-Acetylglucosaminyltransferase family protein
AT5G46780.1	AT5G46780	49	40	47	23	33	19	12	31	3.08091	-0.865921	0.358354	VQ motif-containing protein
AT4G33310.1	AT4G33310	1	0	0	0	14	0	2	0	-0.249387	3.42255	0.358527	unknown protein
AT5G03610.1	AT5G03610	466	450	693	630	670	806	649	820	5.65149	0.283531	0.358721	GDSL-like Lipase/Acylhydrolase superfamily protein
AT2G32235.1	AT2G32235	1230	1438	1678	1638	1181	1513	1065	1476	7.02041	-0.320741	0.358813	unknown protein
AT5G16570.1	AT5G16570	118	102	316	139	77	149	82	105	5.15012	-0.799447	0.359851	glutamine synthetase 1;4
AT2G16586.1	AT2G16586	100	115	77	93	71	95	52	77	3.97865	-0.536788	0.360049	unknown protein
AT1G64880.1	AT1G64880	1368	1442	1768	1569	1907	2142	1813	2002	7.14252	0.238725	0.360136	Ribosomal protein S5 family protein
ATMG00180.1	ATMG00180	11	20	41	38	19	10	5	17	0.8264	-1.19422	0.360136	cytochrome C biogenesis 452
ATMG01410.1	ATMG01410	2	0	1	0	5	8	6	2	-1.04339	2.51783	0.360136	open reading frame 204
ATCG01130.1	ATCG01130	37866	31373	37109	34459	39611	56588	54355	57220	12.3027	0.438898	0.360296	Ycf1 protein
AT1G49180.2	AT1G49180	6	6	7	13	11	10	56	23	1.14015	1.57808	0.360389	protein kinase family protein
AT3G53560.1	AT3G53560	315	338	375	344	517	535	427	522	5.64029	0.421707	0.360389	Tetratricopeptide repeat (TPR)-like superfamily protein
AT3G55560.1	AT3G55560	21	20	24	13	10	20	16	0	4.16363	-0.870652	0.360462	AT-hook protein of GA feedback 2
AT5G25450.2	AT5G25450	0	0	2	0	6	0	7	18	-0.155842	3.62653	0.361055	Cytochrome bd ubiquinol oxidase, 14kDa subunit
AT1G79550.2	AT1G79550	1940	2190	3041	2724	2006	2686	1859	2436	7.84101	-0.25859	0.361507	phosphoglycerate kinase
AT4G15640.1	AT4G15640	119	139	197	151	281	168	204	301	3.87001	0.556356	0.361507	unknown protein
AT4G34790.1	AT4G34790	19	7	7	17	5	5	3	10	2.16363	-1.2431	0.361507	SAUR-like auxin-responsive protein family
AT5G02760.1	AT5G02760	18	15	8	13	10	7	4	4	2.43671	-1.23525	0.361507	Protein phosphatase 2C family protein
AT5G02370.1	AT5G02370	42057	49488	70631	64307	45511	58001	42365	50650	11.9335	-0.31851	0.361621	ATP binding microtubule motor family protein
AT5G40370.1	AT5G40370	632	656	916	751	668	656	586	520	6.48626	-0.384977	0.361621	Glutaredoxin family protein
AT2G17270.1	AT2G17270	13	22	18	9	58	24	31	57	1.29485	1.32859	0.361677	phosphate transporter 3;3
AT3G18010.1	AT3G18010	15	6	7	10	7	1	3	0	0.0927959	-1.83119	0.361677	WUSCHEL related homeobox 1
AT4G19060.1	AT4G19060	356	330	315	299	236	381	226	224	4.88708	-0.428284	0.361677	P-loop containing nucleoside triphosphate hydrolases superfamily protein
AT4G31340.1	AT4G31340	2790	2510	3540	2757	3329	4146	3181	3860	8.21822	0.206103	0.361677	myosin heavy chain-related
AT2G17530.3	AT2G17530	166	171	205	132	252	240	228	289	4.47132	0.465318	0.361775	Protein kinase superfamily protein
AT5G12150.1	AT5G12150	583	552	686	594	714	900	719	823	6.34581	0.264521	0.361775	Rho GTPase activation protein (RhoGAP) with PH domain
AT1G04100.1	AT1G04100	0	2	7	3	22	4	4	26	0.75196	2.1109	0.362152	indoleacetic acid-induced protein 10
AT1G04360.1	AT1G04360	6	2	4	3	0	0	0	2	0.266459	-2.74959	0.36268	RING/U-box superfamily protein
AT2G03505.1	AT2G03505	81	69	67	99	42	64	52	63	3.46782	-0.648774	0.36268	Carbohydrate-binding X8 domain superfamily protein
AT3G11180.1	AT3G11180	0	1	5	0	10	9	19	1	-0.805598	2.61487	0.36268	2-oxoglutarate (2OG) and Fe(II)-dependent oxygenase superfamily protein
AT4G33250.1	AT4G33250	237	226	264	224	314	361	309	328	4.78282	0.344096	0.36268	eukaryotic translation initiation factor 3K
AT1G73600.2	AT1G73600	115	100	223	166	126	139	70	60	5.52068	-0.708769	0.363313	S-adenosyl-L-methionine-dependent methyltransferases superfamily protein
AT1G07200.2	AT1G07200	267	239	294	278	178	251	182	236	4.42799	-0.476198	0.363412	Double Clp-N motif-containing P-loop nucleoside triphosphate hydrolases superfamily protein
AT5G15190.2	AT5G15190	0	5	11	17	7	26	11	46	2.16078	1.29785	0.363578	unknown protein
AT1G29660.1	AT1G29660	153	101	118	102	91	117	72	98	5.10843	-0.461103	0.364523	GDSL-like Lipase/Acylhydrolase superfamily protein
AT1G76230.1	AT1G76230	0	6	0	8	4	22	20	30	0.508683	2.21935	0.365785	unknown protein
AT1G70220.1	AT1G70220	0	0	3	7	0	0	0	0	-0.858219	-4.41286	0.366128	RNA-processing, Lsm domain
AT1G78440.1	AT1G78440	7	12	21	15	3	2	6	0	-0.23625	-2.30666	0.366441	Arabidopsis thaliana gibberellin 2-oxidase 1
AT5G33280.1	AT5G33280	47	68	89	48	33	31	32	60	2.62843	-0.804692	0.366441	Voltage-gated chloride channel family protein
AT3G03530.1	AT3G03530	0	1	6	10	2	0	0	0	-0.17795	-2.85575	0.366781	non-specific phospholipase C4
AT3G16190.1	AT3G16190	182	220	202	198	315	259	277	297	4.90035	0.399143	0.367124	Isochorismatase family protein
AT3G23050.1	AT3G23050	3193	2639	3478	2879	3709	4960	3397	3962	8.5326	0.269079	0.367124	indole-3-acetic acid 7
AT3G59700.1	AT3G59700	0	0	0	0	0	5	0	5	0.506793	4.27481	0.367124	lectin-receptor kinase
AT3G60960.1	AT3G60960	0	0	0	0	0	0	6	2	-0.0158841	4.07663	0.367124	Tetratricopeptide repeat (TPR)-like superfamily protein
AT1G16960.1	AT1G16960	117	112	134	99	102	105	72	51	3.74952	-0.601567	0.368266	Ubiquitin domain-containing protein
AT1G53230.1	AT1G53230	66	33	60	65	110	96	69	85	4.13466	0.571288	0.368266	TEOSINTE BRANCHED 1, cycloidea and PCF transcription factor 3
AT1G78830.1	AT1G78830	195	146	127	87	292	269	207	193	5.63093	0.657257	0.368266	Curculin-like (mannose-binding) lectin family protein
AT2G25540.1	AT2G25540	8	24	22	5	29	53	30	49	1.09595	1.29463	0.368266	cellulose synthase 10
AT3G16410.1	AT3G16410	33	33	39	35	19	31	9	37	3.28538	-0.685083	0.368266	nitrile specifier protein 4
AT4G35785.3	AT4G35785	189	233	252	206	176	171	133	176	4.33922	-0.546625	0.368266	RNA-binding (RRM/RBD/RNP motifs) family protein
AT5G06330.1	AT5G06330	0	0	1	0	5	6	5	0	-0.268011	3.41036	0.368266	Late embryogenesis abundant (LEA) hydroxyproline-rich glycoprotein family
AT5G24780.1	AT5G24780	3378	4059	6500	5130	3579	3418	2794	3965	8.15043	-0.573326	0.368266	vegetative storage protein 1
AT5G51080.2	AT5G51080	181	105	126	154	68	114	107	90	3.1787	-0.703062	0.368266	RNase H family protein
AT1G01500.1	AT1G01500	91	81	96	94	62	68	75	63	3.33704	-0.544953	0.368323	Erythronate-4-phosphate dehydrogenase family protein
AT2G19310.1	AT2G19310	133	68	89	105	102	145	156	195	5.74152	0.47302	0.368323	HSP20-like chaperones superfamily protein
AT3G53342.1	AT3G53342	18	11	22	32	8	2	10	2	0.487044	-1.93064	0.368323	unknown protein
AT4G27240.1	AT4G27240	282	229	315	255	405	419	310	415	5.22879	0.39942	0.368323	zinc finger (C2H2 type) family protein
ATCG00740.1	ATCG00740	2372	2374	2669	2874	3273	3842	4009	3437	8.57055	0.38895	0.368323	RNA polymerase subunit alpha
AT2G14660.1	AT2G14660	108	150	238	175	212	264	195	330	4.64005	0.463684	0.368422	unknown protein
AT2G20835.1	AT2G20835	25	10	44	13	17	11	10	11	2.82166	-0.97584	0.368422	unknown protein
AT3G14370.1	AT3G14370	1	4	0	2	0	0	0	0	-0.880954	-4.00141	0.368422	Protein kinase superfamily protein
AT4G28040.1	AT4G28040	9	0	1	2	3	23	6	44	1.17988	2.40729	0.368422	nodulin MtN21 /EamA-like transporter family protein
AT1G61780.1	AT1G61780	199	210	265	270	198	214	166	243	4.92365	-0.32181	0.368441	postsynaptic protein-related
AT5G38130.1	AT5G38130	48	30	85	65	15	35	8	19	1.0669	-1.69166	0.369135	HXXXD-type acyl-transferase family protein
AT3G18830.1	AT3G18830	461	331	549	355	584	627	559	635	6.21464	0.396983	0.36936	polyol/monosaccharide transporter 5
AT1G09415.1	AT1G09415	560	502	494	524	630	778	862	645	6.37335	0.369816	0.369928	NIM1-interacting 3
AT3G11450.1	AT3G11450	4327	3902	4060	3579	4584	6046	5024	5703	8.71524	0.296941	0.369965	DnaJ domain ;Myb-like DNA-binding domain
AT3G47965.1	AT3G47965	7	0	0	0	0	0	0	0	2.713	-3.97401	0.370607	unknown protein
AT2G38120.1	AT2G38120	3386	2962	4322	3234	2766	3693	2534	3383	8.00946	-0.289803	0.372772	Transmembrane amino acid transporter family protein
AT4G08290.2	AT4G08290	65	48	82	58	116	98	114	148	3.79861	0.810903	0.372772	nodulin MtN21 /EamA-like transporter family protein
AT3G61530.1	AT3G61530	32	19	28	28	13	15	19	3	1.56594	-1.18141	0.372927	Phosphoenolpyruvate carboxylase family protein
AT4G32410.1	AT4G32410	746	651	986	616	724	755	577	601	6.8459	-0.283753	0.37319	cellulose synthase 1
AT1G67860.1	AT1G67860	2206	1891	2366	1854	1547	2060	1693	1753	7.65588	-0.359632	0.373387	unknown protein
AT4G23450.1	AT4G23450	5	1	4	2	12	3	20	11	0.812158	1.84792	0.373387	RING/U-box superfamily protein
AT4G37800.1	AT4G37800	137	76	191	119	189	196	210	145	6.05138	0.416246	0.373387	xyloglucan endotransglucosylase/hydrolase 7
AT3G63280.1	AT3G63280	45	42	37	39	22	38	9	15	1.47145	-1.11848	0.374113	NIMA-related kinase 4
AT3G27770.2	AT3G27770	532	440	509	365	365	425	327	382	5.73564	-0.427879	0.374376	unknown protein
AT3G50570.1	AT3G50570	0	0	0	0	6	2	1	0	1.15437	4.21703	0.374376	hydroxyproline-rich glycoprotein family protein
AT3G54000.3	AT3G54000	291	342	398	322	290	351	264	271	4.99608	-0.32289	0.374376	unknown protein
AT4G38360.2	AT4G38360	268	214	303	225	203	228	213	194	4.7514	-0.379102	0.374376	Protein of unknown function (DUF300)
AT1G67730.1	AT1G67730	717	696	1081	784	1175	1214	852	1103	6.44203	0.295559	0.375084	beta-ketoacyl reductase 1
AT1G25260.1	AT1G25260	177	161	281	220	224	398	331	334	4.39345	0.508755	0.375393	Ribosomal protein L10 family protein
AT1G30270.1	AT1G30270	175	230	279	210	145	217	200	149	4.41969	-0.441842	0.375393	CBL-interacting protein kinase 23
AT2G02160.1	AT2G02160	3843	3402	4103	3438	4077	5465	4805	5231	8.69237	0.282545	0.375393	CCCH-type zinc finger family protein
AT3G10410.1	AT3G10410	786	776	932	739	699	695	622	812	6.14013	-0.311984	0.375393	SERINE CARBOXYPEPTIDASE-LIKE 49
AT1G02340.1	AT1G02340	25	11	29	38	3	4	7	25	0.972887	-1.50703	0.377131	basic helix-loop-helix (bHLH) DNA-binding superfamily protein
AT1G07820.2	AT1G07820	5933	5645	7220	6212	5650	6369	4817	6253	8.91617	-0.236595	0.377131	Histone superfamily protein
AT5G22270.1	AT5G22270	74	65	32	50	117	99	104	120	4.28655	0.846243	0.378221	unknown protein
ATCG00730.1	ATCG00730	0	0	0	0	0	9	0	7	-0.685718	4.89087	0.378221	photosynthetic electron transfer D
AT1G77280.1	AT1G77280	5	12	5	17	4	2	3	1	-0.00375881	-2.02813	0.378358	Protein kinase protein with adenine nucleotide alpha hydrolases-like domain
AT4G38620.1	AT4G38620	522	413	720	531	462	556	366	454	5.71884	-0.361987	0.37846	myb domain protein 4
AT1G73590.1	AT1G73590	212	211	336	241	130	209	175	195	4.15663	-0.606523	0.378692	Auxin efflux carrier family protein
AT5G19400.1	AT5G19400	557	492	633	616	770	855	609	864	6.22233	0.306937	0.379316	Telomerase activating protein Est1
AT4G36820.1	AT4G36820	170	167	196	191	83	138	91	124	3.0327	-0.86663	0.379912	Protein of unknown function (DUF607)
AT3G19190.1	AT3G19190	35	17	40	56	11	28	19	35	2.26097	-0.790263	0.380936	autophagy 2
AT1G67760.1	AT1G67760	0	0	0	0	0	3	3	6	-0.761841	4.56736	0.382767	TCP-1/cpn60 chaperonin family protein
AT3G15690.2	AT3G15690	606	566	696	691	539	720	487	555	6.30833	-0.279464	0.382767	Single hybrid motif superfamily protein
AT1G34245.1	AT1G34245	19	5	21	28	0	18	5	5	1.2804	-1.51517	0.383257	Putative membrane lipoprotein
AT2G14110.1	AT2G14110	53	64	33	53	34	46	25	30	2.23124	-0.744947	0.383456	Haloacid dehalogenase-like hydrolase (HAD) superfamily protein
AT3G52720.1	AT3G52720	56	75	80	55	100	132	92	148	3.813	0.692319	0.383456	alpha carbonic anhydrase 1
AT3G54880.1	AT3G54880	169	203	168	166	213	301	229	283	4.88	0.39902	0.383456	unknown protein
AT4G01460.1	AT4G01460	123	73	90	64	135	105	156	146	3.90901	0.523076	0.383456	basic helix-loop-helix (bHLH) DNA-binding superfamily protein
AT4G27657.1	AT4G27657	17	20	11	10	17	20	17	74	2.84114	0.968206	0.383456	unknown protein
AT5G37930.1	AT5G37930	67	47	38	40	39	17	36	25	2.20782	-0.819824	0.383456	Protein with RING/U-box and TRAF-like domains
AT5G39880.1	AT5G39880	35	21	24	8	89	76	43	47	1.36369	1.39803	0.383456	unknown protein
AT3G54800.1	AT3G54800	5	1	7	6	20	11	18	20	-0.0908607	1.7672	0.383702	Pleckstrin homology (PH) and lipid-binding START domains-containing protein
ATMG00690.1	ATMG00690	81	71	67	80	45	57	48	38	2.61688	-0.795363	0.384871	unknown protein
AT5G39510.1	AT5G39510	273	293	288	269	245	301	221	205	5.16196	-0.336629	0.384932	Vesicle transport v-SNARE family protein
AT1G66540.1	AT1G66540	28	8	3	15	3	2	4	4	0.188826	-2.15253	0.385253	Cytochrome P450 superfamily protein
AT5G57810.1	AT5G57810	7	0	1	0	27	1	16	6	0.150907	2.51382	0.385253	tetraspanin15
AT5G60200.1	AT5G60200	358	377	483	431	306	412	270	418	4.95373	-0.35803	0.385355	TARGET OF MONOPTEROS 6
AT1G33110.2	AT1G33110	96	69	60	88	123	124	111	140	4.38663	0.537202	0.385788	MATE efflux family protein
AT1G69400.2	AT1G69400	13	31	40	51	11	16	23	14	1.50851	-1.16011	0.385788	Transducin/WD40 repeat-like superfamily protein
AT1G62380.1	AT1G62380	12814	9959	13653	12307	13519	19593	16589	16682	10.1511	0.32744	0.386507	ACC oxidase 2
AT1G72440.1	AT1G72440	3008	2870	4147	3586	3930	5428	4626	4742	8.19922	0.348623	0.38728	CCAAT-binding factor
AT1G80440.1	AT1G80440	148	105	65	80	126	160	229	188	5.19275	0.68619	0.388192	Galactose oxidase/kelch repeat superfamily protein
AT2G35600.1	AT2G35600	26	17	10	25	5	9	11	2	0.195363	-1.63675	0.388395	BREVIS RADIX-like 1
AT4G26466.1	AT4G26466	0	0	0	0	6	7	1	0	-1.62058	4.78193	0.388395	lorelei
AT5G06790.1	AT5G06790	59	38	51	70	41	43	35	21	3.36568	-0.748794	0.388631	unknown protein
AT2G16370.1	AT2G16370	118	115	138	117	98	109	74	48	3.39753	-0.684799	0.388754	thymidylate synthase 1
AT2G43820.1	AT2G43820	20	17	16	11	39	25	41	40	4.04418	1.06505	0.389228	UDP-glucosyltransferase 74F2
AT4G02380.1	AT4G02380	779	598	547	568	833	1106	1150	1163	7.41989	0.638831	0.389228	senescence-associated gene 21
AT3G15020.1	AT3G15020	138	180	324	217	184	173	94	190	4.2929	-0.528656	0.389581	Lactate/malate dehydrogenase family protein
AT2G03090.1	AT2G03090	1152	1303	2503	1592	1345	1171	935	1521	6.63304	-0.491757	0.390754	expansin A15
AT4G20300.2	AT4G20300	726	744	1037	824	645	877	630	724	6.39603	-0.330286	0.391205	Protein of unknown function (DUF1639)
AT1G49600.1	AT1G49600	793	767	802	840	1094	1200	929	1159	6.39383	0.323939	0.391487	RNA-binding protein 47A
AT1G69500.1	AT1G69500	42	57	70	56	100	113	110	86	1.76979	0.755779	0.391487	cytochrome P450, family 704, subfamily B, polypeptide 1
AT1G08980.1	AT1G08980	380	282	281	370	478	563	324	495	5.75414	0.360217	0.391561	amidase 1
AT5G07850.1	AT5G07850	3	4	0	3	0	0	0	0	-0.878943	-4.50841	0.391561	HXXXD-type acyl-transferase family protein
AT3G18610.1	AT3G18610	13	22	29	17	44	48	45	38	1.44607	1.00488	0.392946	nucleolin like 2
AT4G27820.1	AT4G27820	123	74	125	139	106	92	61	44	3.80212	-0.708955	0.392946	beta glucosidase 9
AT5G20680.1	AT5G20680	68	40	63	58	76	134	95	76	3.14966	0.611362	0.392946	TRICHOME BIREFRINGENCE-LIKE 16
AT3G05260.1	AT3G05260	1	1	0	0	7	4	3	3	-1.21447	2.69237	0.393413	NAD(P)-binding Rossmann-fold superfamily protein
AT2G30660.1	AT2G30660	34	39	31	14	22	19	9	18	1.80174	-0.935675	0.393509	ATP-dependent caseinolytic (Clp) protease/crotonase family protein
AT1G69910.1	AT1G69910	204	150	304	175	118	226	105	167	4.07817	-0.559761	0.39465	Protein kinase superfamily protein
AT1G66880.1	AT1G66880	34	15	24	24	64	50	36	36	3.98458	0.822747	0.395474	Protein kinase superfamily protein
AT4G22250.1	AT4G22250	38	34	73	36	28	24	16	31	1.97367	-0.965465	0.396057	RING/U-box superfamily protein
AT3G06070.1	AT3G06070	29	13	25	18	11	21	4	8	2.5665	-1.08444	0.396058	unknown protein
AT5G11110.1	AT5G11110	34	80	114	76	47	39	39	48	2.35102	-0.905537	0.396058	sucrose phosphate synthase 2F
AT5G37540.1	AT5G37540	117	67	83	73	122	108	135	155	3.85104	0.4966	0.396058	Eukaryotic aspartyl protease family protein
AT3G08810.1	AT3G08810	11	0	2	0	0	0	0	0	-1.30092	-4.83811	0.39607	Galactose oxidase/kelch repeat superfamily protein
AT4G19990.1	AT4G19990	70	78	83	71	162	126	102	113	3.09911	0.619033	0.39607	FAR1-related sequence 1
AT5G03130.1	AT5G03130	0	0	0	0	0	3	0	8	-0.195724	4.40544	0.39607	unknown protein
AT2G26210.2	AT2G26210	161	90	128	135	99	93	62	135	3.70023	-0.531896	0.396951	Ankyrin repeat family protein
AT1G19050.1	AT1G19050	96	86	133	136	113	29	79	49	3.32248	-0.798249	0.39834	response regulator 7
ATCG00270.1	ATCG00270	3	3	13	6	1	0	1	4	0.921778	-2.04153	0.398473	photosystem II reaction center protein D
AT5G15160.1	AT5G15160	13	19	18	29	8	8	4	17	1.99163	-1.22448	0.39855	BANQUO 2
AT1G77990.1	AT1G77990	112	53	41	70	104	162	112	102	3.47137	0.648214	0.399391	STAS domain / Sulfate transporter family
AT2G41720.2	AT2G41720	92	114	51	98	171	178	135	113	3.93102	0.600537	0.399391	Tetratricopeptide repeat (TPR)-like superfamily protein
AT3G14520.1	AT3G14520	56	30	22	26	6	15	8	33	2.57317	-1.2894	0.400292	Terpenoid cyclases/Protein prenyltransferases superfamily protein
AT2G47240.1	AT2G47240	737	734	1144	749	1093	1329	1086	1063	6.70058	0.336935	0.400843	AMP-dependent synthetase and ligase family protein
AT5G59950.4	AT5G59950	1806	1947	2256	1862	1616	2004	1775	1802	7.44738	-0.247942	0.400881	RNA-binding (RRM/RBD/RNP motifs) family protein
AT5G62760.2	AT5G62760	82	80	94	93	63	93	50	52	2.81092	-0.566656	0.4017	P-loop containing nucleoside triphosphate hydrolases superfamily protein
AT1G72030.1	AT1G72030	296	273	219	230	332	349	331	424	5.354	0.359948	0.4035	Acyl-CoA N-acyltransferases (NAT) superfamily protein
AT5G01030.2	AT5G01030	117	168	152	162	218	246	264	193	4.32911	0.505688	0.403789	Protein of unknown function (DUF3527)
AT5G62630.1	AT5G62630	27	21	15	33	10	25	14	12	3.62463	-0.794527	0.403789	hipl2 protein precursor
AT1G49290.1	AT1G49290	0	0	0	0	4	4	0	7	-1.48675	4.85628	0.405078	unknown protein
AT4G05090.1	AT4G05090	67	58	59	70	65	103	87	158	3.71433	0.561037	0.406332	Inositol monophosphatase family protein
AT1G60960.1	AT1G60960	59	31	68	66	80	91	95	94	3.78428	0.583911	0.406344	iron regulated transporter 3
AT2G38750.1	AT2G38750	49	27	64	65	30	32	39	34	2.89476	-0.692567	0.406344	annexin 4
AT3G52105.1	AT3G52105	1426	1163	1068	1018	1589	1653	1388	1839	6.98352	0.331651	0.406344	unknown protein
AT5G04045.1	AT5G04045	0	9	3	0	31	16	5	19	0.479332	2.34383	0.406344	Putative membrane lipoprotein
AT2G32580.2	AT2G32580	183	214	254	198	143	197	165	178	4.63081	-0.434268	0.40743	Protein of unknown function (DUF1068)
AT4G27890.1	AT4G27890	0	0	2	0	0	8	5	7	-1.28921	2.94478	0.40743	HSP20-like chaperones superfamily protein
AT3G62270.1	AT3G62270	42	34	43	24	60	61	84	70	2.31455	0.837919	0.407503	HCO3- transporter family
AT4G01897.1	AT4G01897	146	144	235	161	128	153	126	139	4.17867	-0.435486	0.407669	unknown protein
AT5G66550.1	AT5G66550	221	192	302	217	189	186	140	240	4.41318	-0.418568	0.407974	Maf-like protein
AT3G43600.1	AT3G43600	15	10	13	13	2	12	2	6	1.79935	-1.35656	0.408484	aldehyde oxidase 2
AT4G25880.1	AT4G25880	234	220	293	224	298	350	342	347	4.84059	0.349874	0.408484	pumilio 6
AT2G44925.1	AT2G44925	0	0	0	0	13	4	0	0	-0.932355	5.09913	0.408498	unknown protein
AT4G24920.1	AT4G24920	437	508	662	510	473	484	402	490	6.44952	-0.308317	0.408631	secE/sec61-gamma protein transport protein
AT3G26910.1	AT3G26910	31	24	22	36	14	22	17	12	2.22181	-0.923473	0.408648	hydroxyproline-rich glycoprotein family protein
AT5G67060.1	AT5G67060	8	23	25	6	13	5	5	1	1.46686	-1.4377	0.409587	basic helix-loop-helix (bHLH) DNA-binding superfamily protein
AT2G30200.2	AT2G30200	419	402	530	457	386	389	342	395	5.596	-0.370565	0.4098	catalytics;transferases;[acyl-carrier-protein] S-malonyltransferases;binding
AT4G19120.1	AT4G19120	398	331	515	401	587	610	552	473	6.07944	0.331752	0.4098	S-adenosyl-L-methionine-dependent methyltransferases superfamily protein
AT5G08590.1	AT5G08590	362	312	511	344	317	361	240	380	5.44839	-0.352343	0.409811	SNF1-related protein kinase 2.1
AT5G26670.2	AT5G26670	91	110	150	89	66	96	76	95	3.84531	-0.519148	0.410493	Pectinacetylesterase family protein
AT5G49690.1	AT5G49690	0	2	0	0	1	20	15	0	-0.519019	3.69165	0.410493	UDP-Glycosyltransferase superfamily protein
AT5G59310.1	AT5G59310	1788	2088	3808	2045	3545	4803	3363	4102	9.76883	0.59851	0.410647	lipid transfer protein 4
AT5G05070.1	AT5G05070	0	1	0	0	5	7	0	5	-1.53457	3.37438	0.411093	DHHC-type zinc finger family protein
AT3G06180.1	AT3G06180	151	91	230	167	108	130	96	122	3.97505	-0.584145	0.411641	Ribosomal protein L34e superfamily protein
AT3G20350.1	AT3G20350	74	44	58	31	34	55	27	21	2.85456	-0.729756	0.411814	unknown protein
AT4G29590.1	AT4G29590	61	37	52	46	74	91	81	86	3.09384	0.64011	0.411814	S-adenosyl-L-methionine-dependent methyltransferases superfamily protein
AT1G55910.1	AT1G55910	77	37	78	63	82	25	27	32	4.25306	-0.700561	0.411976	zinc transporter 11 precursor
AT3G63390.1	AT3G63390	123	124	234	205	261	248	203	278	4.43007	0.42949	0.411976	unknown protein
AT4G17500.1	AT4G17500	125	91	151	123	152	255	257	199	4.19649	0.712686	0.411976	ethylene responsive element binding factor 1
AT5G20230.1	AT5G20230	23	23	8	20	35	24	42	66	4.42274	1.024	0.412393	blue-copper-binding protein
AT5G45460.1	AT5G45460	21	33	21	19	41	51	28	66	2.59586	0.823789	0.412393	unknown protein
AT4G17100.2	AT4G17100	63	69	95	89	82	45	57	48	3.55906	-0.538487	0.412756	unknown protein
AT4G20910.2	AT4G20910	76	64	100	89	100	118	146	129	3.04813	0.482796	0.41334	double-stranded RNA binding protein-related / DsRBD protein-related
AT4G08400.1	AT4G08400	0	0	0	0	0	33	1	0	-1.12335	5.91331	0.413618	Proline-rich extensin-like family protein
AT1G07350.2	AT1G07350	453	395	542	430	383	509	310	376	5.47841	-0.331092	0.414724	RNA-binding (RRM/RBD/RNP motifs) family protein
AT3G57320.1	AT3G57320	169	120	148	118	133	130	40	107	3.82009	-0.579551	0.414724	unknown protein
AT3G61170.1	AT3G61170	0	0	2	0	2	9	0	14	-0.78377	3.22591	0.414724	Tetratricopeptide repeat (TPR)-like superfamily protein
AT1G71980.1	AT1G71980	390	375	376	449	429	673	516	601	5.75951	0.345657	0.416195	Protease-associated (PA) RING/U-box zinc finger family protein
AT3G13100.1	AT3G13100	8	13	5	2	5	1	0	1	0.514674	-2.07434	0.416828	multidrug resistance-associated protein 7
AT1G06640.2	AT1G06640	13	10	5	3	15	26	7	20	2.93595	0.961374	0.417306	2-oxoglutarate (2OG) and Fe(II)-dependent oxygenase superfamily protein
AT1G27540.2	AT1G27540	495	511	688	605	662	893	693	906	5.75778	0.335596	0.417306	Protein of unknown function (DUF295)
AT1G29500.1	AT1G29500	233	273	371	268	250	263	133	222	4.19863	-0.522966	0.417306	SAUR-like auxin-responsive protein family
AT2G34180.1	AT2G34180	4	1	2	0	13	17	0	1	0.933012	1.91566	0.417306	CBL-interacting protein kinase 13
AT3G13510.1	AT3G13510	1524	1466	1934	1770	1489	1558	1197	1747	6.83895	-0.279763	0.417306	Protein of Unknown Function (DUF239)
AT3G43930.1	AT3G43930	8	9	12	13	3	4	4	3	0.297353	-1.65828	0.417306	BRCT domain-containing DNA repair protein
AT2G14800.1	AT2G14800	3	0	10	2	10	12	9	19	0.130901	1.63331	0.419081	unknown protein
AT2G46070.1	AT2G46070	4	4	17	5	2	6	0	0	1.38659	-1.94364	0.419081	mitogen-activated protein kinase 12
AT4G12470.1	AT4G12470	9	6	4	4	3	7	14	51	2.91172	1.52066	0.419081	azelaic acid induced 1
AT1G09470.2	AT1G09470	36	49	71	37	75	86	68	103	2.53782	0.667652	0.41948	unknown protein
AT3G14420.5	AT3G14420	1954	1312	1608	1488	1828	2271	1922	2261	8.74247	0.253721	0.41948	Aldolase-type TIM barrel family protein
AT3G57930.2	AT3G57930	1493	1591	1889	1421	1833	2314	2094	2176	7.75908	0.278436	0.41948	unknown protein
AT5G22320.1	AT5G22320	559	419	614	469	618	875	671	772	5.65377	0.389862	0.41948	Leucine-rich repeat (LRR) family protein
AT5G62900.1	AT5G62900	71	75	67	73	21	44	26	76	3.46506	-0.937131	0.41948	unknown protein
AT3G03690.1	AT3G03690	199	236	298	280	198	266	159	205	4.4809	-0.416632	0.420453	Core-2/I-branching beta-1,6-N-acetylglucosaminyltransferase family protein
AT3G19760.1	AT3G19760	1079	1031	1418	1392	1056	1255	866	1290	6.8909	-0.261628	0.420453	eukaryotic initiation factor 4A-III
AT1G73602.1	AT1G73602	115	93	223	166	126	139	70	60	5.49781	-0.689756	0.420638	conserved peptide upstream open reading frame 32
AT3G55610.1	AT3G55610	312	300	336	299	364	474	380	480	5.47049	0.31725	0.420656	delta 1-pyrroline-5-carboxylate synthase 2
AT2G37970.1	AT2G37970	204	137	185	214	233	277	288	257	5.72396	0.399967	0.421472	SOUL heme-binding family protein
AT1G33800.1	AT1G33800	29	39	58	39	51	103	50	85	4.92481	0.674427	0.421654	Protein of unknown function (DUF579)
AT1G54020.1	AT1G54020	56	158	182	165	89	78	62	86	2.41758	-0.941326	0.422063	GDSL-like Lipase/Acylhydrolase superfamily protein
AT4G12560.2	AT4G12560	562	487	552	446	400	490	404	462	5.57135	-0.347683	0.422063	F-box and associated interaction domains-containing protein
AT1G01690.1	AT1G01690	74	85	113	87	57	61	39	38	2.50103	-0.992902	0.422317	putative recombination initiation defects 3
AT5G46730.1	AT5G46730	968	1233	1693	1641	1119	1232	1106	1358	7.11867	-0.309519	0.422317	glycine-rich protein
AT2G44650.1	AT2G44650	1520	1434	1767	1616	2172	2259	1870	2043	7.92242	0.280331	0.422625	chloroplast chaperonin 10
AT5G49330.1	AT5G49330	525	478	653	404	717	845	579	751	5.44024	0.367459	0.422625	myb domain protein 111
AT3G18560.1	AT3G18560	186	141	153	121	205	206	272	266	4.11858	0.544025	0.423936	unknown protein
AT4G27030.1	AT4G27030	88	84	106	99	111	120	146	181	4.24035	0.452517	0.423936	fatty acid desaturase A
AT5G49920.1	AT5G49920	9	10	8	23	79	53	11	8	1.24591	1.45799	0.423936	Octicosapeptide/Phox/Bem1p family protein
AT1G31430.1	AT1G31430	0	0	0	0	2	5	1	0	-0.750196	4.00868	0.424003	Pentatricopeptide repeat (PPR-like) superfamily protein
AT4G16070.1	AT4G16070	39	36	70	23	26	33	6	30	2.08625	-0.947521	0.424003	Mono-/di-acylglycerol lipase, N-terminal;Lipase, class 3
AT3G25170.1	AT3G25170	10	5	8	0	18	31	18	25	0.362775	1.83982	0.424451	ralf-like 26
AT4G38000.1	AT4G38000	0	0	7	3	0	0	0	0	-1.05343	-4.36261	0.424451	DNA binding with one finger 4.7
AT3G15351.1	AT3G15351	120	119	137	107	190	196	159	157	3.92617	0.420796	0.425125	unknown protein
AT4G22380.1	AT4G22380	445	438	500	472	586	668	533	642	5.62806	0.265236	0.425758	Ribosomal protein L7Ae/L30e/S12e/Gadd45 family protein
AT5G66210.2	AT5G66210	43	44	63	62	41	25	20	20	2.48288	-1.09323	0.425758	calcium-dependent protein kinase 28
AT1G60987.1	AT1G60987	0	0	0	0	0	0	11	0	-0.229858	4.59723	0.426175	SCR-like 5
AT2G16016.1	AT2G16016	9	3	10	6	32	7	27	28	0.311945	1.67379	0.426707	unknown protein
AT1G03850.1	AT1G03850	15	3	5	6	1	2	4	3	1.63131	-1.60944	0.426856	Glutaredoxin family protein
AT2G17690.1	AT2G17690	0	4	0	9	0	0	0	0	-0.551215	-4.84956	0.426856	F-box family protein with a domain of unknown function (DUF295)
AT3G43980.1	AT3G43980	1102	1115	1400	1427	1443	1818	1641	1547	6.9002	0.241015	0.427046	Ribosomal protein S14p/S29e family protein
AT3G54390.1	AT3G54390	558	487	707	536	505	558	429	438	5.30741	-0.357058	0.427046	sequence-specific DNA binding transcription factors
AT4G37470.1	AT4G37470	212	136	157	130	236	239	218	234	5.32642	0.422433	0.427046	alpha/beta-Hydrolases superfamily protein
AT5G54710.1	AT5G54710	22	44	35	13	34	89	37	53	4.26687	0.737259	0.427152	Ankyrin repeat family protein
AT1G02030.1	AT1G02030	1	5	4	8	13	13	19	14	0.508939	1.58609	0.427214	C2H2-like zinc finger protein
AT5G54280.2	AT5G54280	611	534	596	604	493	536	351	589	6.38322	-0.38682	0.427439	myosin 2
AT2G19480.2	AT2G19480	13383	12457	16114	14489	15388	20152	16769	19090	10.5343	0.219683	0.42775	nucleosome assembly protein 1;2
AT2G23680.2	AT2G23680	10	10	5	13	5	0	7	5	1.95005	-1.24854	0.42775	Cold acclimation protein WCOR413 family
AT3G45930.1	AT3G45930	1948	1675	2671	2107	1862	1902	1424	2061	7.5096	-0.32428	0.42775	Histone superfamily protein
AT1G53300.1	AT1G53300	28	11	16	6	41	29	24	66	1.92616	1.24741	0.427794	tetratricopetide-repeat thioredoxin-like 1
AT5G61900.3	AT5G61900	97	97	107	125	177	171	182	127	4.1432	0.518004	0.427794	Calcium-dependent phospholipid-binding Copine family protein
AT1G18740.1	AT1G18740	167	93	140	147	156	177	251	215	4.75652	0.444044	0.428165	Protein of unknown function (DUF793)
AT2G02450.1	AT2G02450	14	10	12	12	10	27	27	34	1.91078	0.894032	0.428165	NAC domain containing protein 35
AT2G14740.1	AT2G14740	180	204	210	191	131	214	163	139	4.37554	-0.40736	0.428165	vaculolar sorting receptor 3
AT2G46340.1	AT2G46340	265	168	219	268	144	184	193	220	4.7645	-0.431175	0.428165	SPA (suppressor of phyA-105) protein family
AT3G02080.1	AT3G02080	2316	2308	3075	2747	3370	3611	3033	3474	8.13138	0.255806	0.428165	Ribosomal protein S19e family protein
AT3G07360.2	AT3G07360	527	366	518	320	334	431	394	309	6.14288	-0.34999	0.428165	plant U-box 9
AT3G23250.1	AT3G23250	2	0	0	6	0	0	0	0	-0.596406	-4.15153	0.428165	myb domain protein 15
AT5G65380.1	AT5G65380	168	143	196	181	250	307	245	224	4.4131	0.461892	0.428165	MATE efflux family protein
AT3G02480.1	AT3G02480	1	1	13	2	29	5	21	8	2.12724	1.89713	0.428221	Late embryogenesis abundant protein (LEA) family protein
AT3G04140.1	AT3G04140	27	11	39	37	14	19	18	17	2.60854	-0.834443	0.428471	Ankyrin repeat family protein
AT3G43280.1	AT3G43280	4	0	2	4	0	0	0	0	-1.68608	-4.44276	0.428471	unknown protein
AT5G50200.1	AT5G50200	11	12	6	1	23	13	19	15	3.09334	1.08719	0.428471	nitrate transmembrane transporters
AT2G31810.3	AT2G31810	255	182	224	218	277	307	329	358	5.06444	0.414928	0.428519	ACT domain-containing small subunit of acetolactate synthase protein
AT1G53060.1	AT1G53060	0	0	1	6	8	6	4	8	-0.137043	1.71398	0.428837	Legume lectin family protein
AT1G67610.1	AT1G67610	1	6	1	3	0	0	0	0	-1.38452	-4.64032	0.428837	pseudogene
AT5G57340.2	AT5G57340	110	114	68	109	180	151	204	146	4.34229	0.640747	0.428837	unknown protein
AT1G13270.1	AT1G13270	153	131	155	162	195	208	213	223	4.73917	0.365392	0.428883	methionine aminopeptidase 1B
AT1G33850.1	AT1G33850	1	6	0	1	0	0	0	0	-1.42721	-4.2203	0.428883	Ribosomal protein S19 family protein
AT3G02720.1	AT3G02720	61	54	112	80	101	172	100	115	3.87987	0.555476	0.428883	Class I glutamine amidotransferase-like superfamily protein
AT4G20160.1	AT4G20160	13	4	14	3	23	25	31	22	0.244221	1.47921	0.428883	unknown protein
AT5G55220.1	AT5G55220	566	531	582	575	640	896	606	870	6.48775	0.281964	0.428883	trigger factor type chaperone family protein
AT5G15230.1	AT5G15230	1120	1028	1244	1102	907	950	596	981	6.43479	-0.518512	0.429146	GAST1 protein homolog 4
AT3G46030.1	AT3G46030	3009	2999	3745	3319	3008	3281	2350	3124	8.23447	-0.274684	0.429214	Histone superfamily protein
AT3G13782.1	AT3G13782	17	15	13	18	13	6	0	2	0.779705	-1.69277	0.430024	nucleosome assembly protein1;4
AT5G63790.1	AT5G63790	156	135	147	182	125	152	98	114	4.9679	-0.472729	0.430319	NAC domain containing protein 102
AT2G25790.1	AT2G25790	84	63	47	46	63	112	93	156	3.37435	0.663266	0.431434	Leucine-rich receptor-like protein kinase family protein
AT3G52860.1	AT3G52860	112	136	140	172	95	118	119	110	3.5344	-0.458695	0.431434	unknown protein
AT3G61930.1	AT3G61930	31	54	71	37	18	20	26	34	2.06403	-1.07756	0.432015	unknown protein
AT5G23730.1	AT5G23730	152	126	150	171	111	119	94	162	4.2174	-0.429333	0.432015	Transducin/WD40 repeat-like superfamily protein
AT1G56210.1	AT1G56210	1289	1149	1243	1193	1084	1185	935	916	6.35729	-0.36657	0.432542	Heavy metal transport/detoxification superfamily protein
AT3G57260.1	AT3G57260	4	13	20	15	4	1	11	8	4.90803	-1.17482	0.432542	beta-1,3-glucanase 2
AT1G13390.2	AT1G13390	886	718	856	784	703	848	663	751	6.24159	-0.254892	0.433147	unknown protein
AT4G25720.2	AT4G25720	94	84	101	85	64	61	72	76	3.07892	-0.526655	0.433577	glutaminyl cyclase
AT2G24750.1	AT2G24750	118	91	101	89	54	113	58	50	3.14733	-0.681734	0.434141	pseudogene
AT2G43150.1	AT2G43150	98	164	200	120	97	121	116	124	6.57684	-0.456759	0.434141	Proline-rich extensin-like family protein
AT3G25010.1	AT3G25010	0	2	10	0	7	22	12	3	1.91784	1.76649	0.434141	receptor like protein 41
AT1G06950.1	AT1G06950	659	730	974	771	849	1227	1019	1048	6.71784	0.287076	0.434513	translocon at the inner envelope membrane of chloroplasts 110
AT1G15180.2	AT1G15180	16	8	17	4	14	36	10	34	3.20439	0.909449	0.434513	MATE efflux family protein
AT3G09915.1	AT3G09915	0	0	0	0	1	0	2	11	-1.41638	4.78183	0.434513	pseudogene
AT4G35250.1	AT4G35250	285	185	258	228	221	208	168	208	5.5131	-0.36576	0.434513	NAD(P)-binding Rossmann-fold superfamily protein
AT3G29410.1	AT3G29410	0	1	2	0	3	6	6	9	-0.664358	2.7141	0.435083	Terpenoid cyclases/Protein prenyltransferases superfamily protein
AT3G16570.1	AT3G16570	254	190	200	185	382	290	231	327	6.00495	0.443036	0.436027	rapid alkalinization factor 23
AT3G47690.1	AT3G47690	108	39	95	97	43	49	47	75	2.56705	-0.772998	0.436027	microtubule end binding protein EB1A
ATCG00750.1	ATCG00750	95	119	68	99	148	206	176	134	4.04168	0.656475	0.436027	ribosomal protein S11
AT4G23496.1	AT4G23496	65	143	211	114	193	318	192	264	4.20175	0.742571	0.436079	SPIRAL1-like5
AT3G02610.1	AT3G02610	59	75	75	42	40	36	21	33	2.16212	-1.07924	0.436145	Plant stearoyl-acyl-carrier-protein desaturase family protein
AT3G14690.1	AT3G14690	48	37	49	30	74	69	74	74	3.3506	0.716215	0.436145	cytochrome P450, family 72, subfamily A, polypeptide 15
AT5G51451.1	AT5G51451	0	3	0	4	11	12	10	16	-0.352333	2.56608	0.436145	unknown protein
AT4G32850.5	AT4G32850	1765	1600	1812	1581	1335	1808	1349	1535	7.30054	-0.295105	0.436313	nuclear poly(a) polymerase
AT3G13227.1	AT3G13227	7	1	2	0	27	12	9	10	-0.315668	2.36576	0.436621	serine-rich protein-related
AT4G03298.1	AT4G03298	0	0	0	0	0	0	6	7	-1.53289	4.73348	0.436621	unknown protein
AT5G53742.1	AT5G53742	9	2	22	11	0	6	2	0	-0.615657	-2.48101	0.436621	Protein of unknown function (DUF1278)
AT4G38560.1	AT4G38560	0	0	2	0	6	0	6	0	1.76552	2.27275	0.436891	Arabidopsis phospholipase-like protein (PEARLI 4) family
AT5G52360.1	AT5G52360	22	14	31	4	45	60	35	70	1.10236	1.44277	0.436891	actin depolymerizing factor 10
AT2G28600.1	AT2G28600	198	188	217	180	285	349	242	271	4.3494	0.423547	0.437105	P-loop containing nucleoside triphosphate hydrolases superfamily protein
AT3G01870.1	AT3G01870	0	0	0	0	0	3	5	9	-1.38596	5.0625	0.437607	Plant protein of unknown function (DUF946)
AT4G37750.1	AT4G37750	546	642	907	712	527	540	483	675	5.49338	-0.444759	0.438773	Integrase-type DNA-binding superfamily protein
AT1G04660.1	AT1G04660	1676	1536	2122	2171	3353	3245	2189	3133	6.93615	0.549752	0.438896	glycine-rich protein
AT1G13670.1	AT1G13670	13	2	9	4	0	7	0	0	0.619571	-2.09808	0.438896	unknown protein
AT1G28660.1	AT1G28660	8	2	5	3	1	5	0	0	4.34749	-1.64507	0.438896	GDSL-like Lipase/Acylhydrolase superfamily protein
AT1G66390.1	AT1G66390	0	0	5	3	10	17	18	8	-0.391498	2.62887	0.438896	myb domain protein 90
AT1G78700.1	AT1G78700	69	40	74	94	43	64	34	65	2.99858	-0.552952	0.438896	BES1/BZR1 homolog 4
AT1G80180.1	AT1G80180	334	255	218	208	339	360	412	350	6.61928	0.399916	0.438896	unknown protein
AT3G47120.1	AT3G47120	328	349	449	423	503	660	441	503	5.43727	0.321263	0.438896	RNA recognition motif (RRM)-containing protein
AT2G02710.1	AT2G02710	176	145	86	112	254	217	246	240	5.05935	0.744094	0.438925	PAS/LOV protein B
AT3G18550.2	AT3G18550	46	18	18	10	48	92	99	36	2.97256	1.44779	0.439223	TCP family transcription factor
AT2G19750.1	AT2G19750	642	568	759	722	888	970	719	918	6.62611	0.257732	0.439535	Ribosomal protein S30 family protein
AT4G32520.1	AT4G32520	409	362	566	451	621	633	624	549	5.4233	0.34225	0.439535	serine hydroxymethyltransferase 3
AT2G04038.1	AT2G04038	0	0	0	0	0	3	2	11	-1.41552	4.94063	0.439767	basic leucine-zipper 48
AT1G05910.1	AT1G05910	144	146	180	113	237	221	173	224	3.95871	0.433885	0.440116	cell division cycle protein 48-related / CDC48-related
AT1G55770.1	AT1G55770	0	0	0	1	0	7	8	5	-1.1386	3.67651	0.440116	Plant invertase/pectin methylesterase inhibitor superfamily protein
AT1G78970.1	AT1G78970	198	129	142	200	136	150	140	78	4.79569	-0.522836	0.440116	lupeol synthase 1
AT3G61360.1	AT3G61360	9	5	23	9	23	35	47	20	1.4315	1.38804	0.440116	Tetratricopeptide repeat (TPR)-like superfamily protein
AT4G04320.1	AT4G04320	124	109	189	115	82	141	102	81	3.8123	-0.512203	0.440116	malonyl-CoA decarboxylase family protein
AT4G28480.2	AT4G28480	214	173	255	215	185	155	206	152	4.43597	-0.38934	0.440116	DNAJ heat shock family protein
AT5G15780.1	AT5G15780	1138	878	1123	1069	1518	1543	1194	1349	6.97661	0.294074	0.44016	Pollen Ole e 1 allergen and extensin family protein
AT2G38870.1	AT2G38870	172	99	122	85	191	180	153	191	5.19931	0.455573	0.440833	Serine protease inhibitor, potato inhibitor I-type family protein
[truncated: 23,953 more rows]
