# Supplementary material for: A CRC–MYB-mediated local chromatin loop at the MAB4 locus determines auxin-mediated nectary size in Arabidopsis thaliana
Source: Research Square preprint supplement (doi:10.21203/rs.3.rs-7421252/v1), 2025-09-07
Supplement: Supplementary file 2 [file 1f6e077813967d2a3ff85a41.xlsx]

## Sheet: Sheet1
Supplementary Data10. Primers used in this study.
Primers used for genotyping
Primer name	Sequence (5'→ 3')
myb57-2 (SALK_030969C)-LP	CACTACATGTTCACACATGGC
myb57-2 (SALK_030969C)-RP	CCGCCTCGAGTATCTCTCTCT
LBb1.3	ATTTTGCCGATTTCGGAAC
myb21-1 (SALK_042711C)-LP	GCCTATTTCTCCTCCATGCTC
myb21-1 (SALK_042711C)-RP	TTTTGATCTCGTTGTCCGTTC
myb24-1 (SALK_017221C)-LP	ACGGCAATCCACTAAAAACTG
myb24-1 (SALK_017221C)-RP	TCTCATTGTCGGTTCTTCCTG
mab4-2 (SALK_104491)-LP	TTGCAAGCTAGATTCCCACTC
mab4-2 (SALK_104491)-RP	ACTTGACGAATTTGCCATCAG
mab4-3 (SALK_064846)-LP	TCTACTTTGAGCAGCTCCGAG
mab4-3 (SALK_064846)-RP	AACACAATACCATAGGCGCAG
bop1-3 (SALK_012994)-LP	TGCACAATCTTTCGACTTCATC
bop1-3 (SALK_012994)-RP	TGACATCGGAGAAAGCTTGAC
bop2-1 (SALK_075879)-LP	AAAGAGAGAACCTGGGTGAGC
bop2-1 (SALK_075879)-RP	ATTTGGCCCACCTTTGTATTC
ga2ox6-6 (SALK_200111C)-LP	AACCATGGAGTTAAACCGGAG
ga2ox6-6 (SALK_200111C)-RP	CCTATATGCCACCAAATTAGGG
yab5 (SALK_041504C)-LP	GTGTAGGTGAATGTCCCATGC
yab5 (SALK_041504C)-RP	GTACGCAGAAGGTACTCGCTG
psk3 (SALK_094677C)-LP	CTCACACATCCGTCACACATC
psk3 (SALK_094677C)-RP	TCAGCTACATCAGTGGAAGAGG
rha3b (SALK_204768C)-LP	AAACGAGTTCACATGACCGAC
rha3b (SALK_204668C)-RP	TTTTTGCCGATATGACATGG
cdkl (SALK_037407C)-LP	ATTCACTTGCAAAAGCCATTG
cdkl (SALK_037407C)-RP	CTGATTCAAGCCACGAAGAAG
tmo6 (SALK_201987C)-LP	ACAAAGCAAGAGAAGCAATGG
tmo6 (SALK_201987C)-RP	GTTCATTCCAGAAGCCATTTG
mel1-1 (GK-027H10)-LP	CTAATGCTTCTTGCTTGTGGAAG
mel1-1 (GK-027H10)-RP	CCTGATGAGAAACGTAGCGTTTC
GABI-o8409	ATATTGACCATCATACTCATTGC
npy8 (SALK_038541C)-LP	CCAGTAGCAGCCAACAGAGAC
npy8 (SALK_038541C)-RP	AAGAAGAAGATCTCGTTCGGC
Primers used for cloning
Primer name	Sequence (5'→ 3')
proSWEET9-FW	caccTTTGTAGGCACCAGTGGTCC
proSWEET9-RV	CTTCACTTTTCTCTCTTTCTCTTGC
proMYB57-FW	GACTGTTCCCTCCCATTGGA
proMYB57-RV	CTTTCTTTCTGTTGTGTATGTGTG
proMYB21-FW	AGTCGGATTAACATGTCGAG
proMYB21-RV	CGTATATAATAAAGTAAATAAAGAATAATAACAAAAAAA
proMYB24-FW	GCAAAATGTTTCGTG
proMYB24-RV	GATCTTTGGCCCATGAATATATATAATGGTAAT
gMYB57-FW	GACTGTTCCCTCCCATTGGA
gMYB57-RV	AATCACATGGTGGTCACCATTAAGC
CRC cDNA-FW	CACCATGACGGCTTCAAGGGCTTC
CRC cDNA-RV	TCACTTCTTCTCACCGAATCCC
MYB57 cDNA-FW	CACCATGGAGACGACGATGAAGAAGAA
MYB57 cDNA-RV	TTAAATCACATGGTGGTCACCATTA
MYB21 cDNA-FW	CACCATGGAGAAAAGAGGAGGGGAAGTAGTGG
MYB21 cDNA-RV	TCAATTACCATTCAATAAATGCATTG
MYB24 cDNA-FW	CACCATGGAGAAAAGAGAAAGTAGTGGTGGG
MYB24 cDNA-RV	TTAATTACCATTATATATATTCATGGGCC
proMAB4-FW	caccTGTTATGTCGCTTAAAAGTAGG
proMAB4-RV	ATTTCTTCGTCTTGTTTACCAAAAGG
proMAB4delta-FW	caccTGGCCATGCAACATGAGTG
proMAB4delta-RV	ATTTCTTCGTCTTGTTTACCAAAAGG
proMAB4m6(1)-FW	AAGTTTAAGGtctagAATAGTAATTTTTTAGTCAACTAC
proMAB4m6(1)-RV	TTATTTGGCACTTGACAG
proMAB4m6(2)-FW	AACTTTTTTTctagaCCTCACCAACTGC
proMAB4m6(2)-RV	TGTCGTCCAGGTTTTATG
proMAB4m6(3)-FW	TGATTTCATTctagaCTCTCTCTCTATCTCTCTTTAATTCC
proMAB4m6(3)-RV	GACGCCGCCAATGCTTTT
proMAB4m6(4)-FW	tcatCTTTTCTCTTGTTCCCCTAC
proMAB4m6(4)-RV	gctcAATCTAGCTTGCAAATATTC
proMAB4m6(5)-FW	gctcGATTATCTTTCTAAAGCTTTTTG
proMAB4m6(5)-RV	tcagATAATCACTCACACACAG
proMAB4m6(6)-FW	tcagtgtgagTTCTTTTATTAACTAACAAACATTTTC
proMAB4m6(6)-RV	tatctgacacaAGAGACCATTAATGGAAAAG
proMAB4deltam3-FW	caccTGGCCATGCAACATGAGTG
proMAB4deltam3-RV	ATTTCTTCGTCTTGTTTACCAAAAGG
gMAB4-FW	caccTGTTATGTCGCTTAAAAGTAGG
gMAB4-RV	CGATATCGAATGTCTGCGGC
gMAB4-GFP+3'delta-FW	CACCATGAAGTTCATGAAACTTGGATCC
gMAB4-GFP+3'delta-RV	aactttttttttaactctataatatatattctc
Primers used for RT-qPCR
Primer name	Sequence (5'→ 3')
MAB4-FW	AGCAAGAGGAAGCAAGAGCAC
MAB4-RV	CCCAGGCCATATCTTCTCAA
TUB2-FW	ATCCGTGAAGAGTACCCAGAT
TUB2-RV	AAGAACCATGCACTCATCAGC
Primers used for 3C-qPCR
Primer name	Sequence (5'→ 3')
3C-I-FW	GACATGCAGACCCCACCAAG
3C-II-FW	GACTACACGAGACGAG
3C-III-FW	GGAAAGGGATCCACCATTAC
3C-IV-FW	GAGTTCTCGTTGAGC
3C-V-FW	CAGAAGCTGGAAAGACAC
3C-VI-FW	GCAAGGTGGTTACCAGAATCTATGG
3C-VII-FW	GTGAAAGTGATGGACGAC

## Sheet: Sheet2
clone	FW	RV	備考
proMYB57	caccGACTGTTCCCTCCCATTGGA	CTTTCTTTCTGTTGTGTATGTGTG
proMAB4	caccTGTTATGTCGCTTAAAAGTAGG	ATTTCTTCGTCTTGTTTACCAAAAGG	proMAB4のRVはColの開始コドンの隣から設計しています。
			Lerの開始コドンの位置はColと異なっていますが、Lerの第1エキソンと第3エキソンにプライマーを設計してLerのcDNAでPCRをしてもバンドが見えず、Colの第1エキソンとLerの第3エキソンにプライマーを設計してLerのcDNAでPCRをするとバンドが見えたので、Lerの開始コドンの位置は間違っているのではないかと考えています（右図）。
proMAB4delta	caccTGGCCATGCAACATGAGTG	ATTTCTTCGTCTTGTTTACCAAAAGG	RVはproMAB4と共通
proMAB4m6	AAGTTTAAGGtctagAATAGTAATTTTTTAGTCAACTAC	TTATTTGGCACTTGACAG	proMAB4に変異を導入
	AACTTTTTTTctagaCCTCACCAACTGC	TGTCGTCCAGGTTTTATG
	TGATTTCATTctagaCTCTCTCTCTATCTCTCTTTAATTCC	GACGCCGCCAATGCTTTT
	tcatCTTTTCTCTTGTTCCCCTAC	gctcAATCTAGCTTGCAAATATTC
	gctcGATTATCTTTCTAAAGCTTTTTG	tcagATAATCACTCACACACAG
	tcagtgtgagTTCTTTTATTAACTAACAAACATTTTC	tatctgacacaAGAGACCATTAATGGAAAAG
proMAB4deltam3	caccTGGCCATGCAACATGAGTG	ATTTCTTCGTCTTGTTTACCAAAAGG	proMAB4m6を鋳型にして作製、FW・RVともにproMAB4deltaと共通
gMAB4	caccTGTTATGTCGCTTAAAAGTAGG	CGATATCGAATGTCTGCGGC	FWはproMAB4と共通
