# Supplementary material for: A CRC–MYB-mediated local chromatin loop at the MAB4 locus determines auxin-mediated nectary size in Arabidopsis thaliana
Source: Research Square preprint supplement (doi:10.21203/rs.3.rs-7421252/v1), 2025-09-07
Supplement: Supplementary file 3 [file 1fe7dd546b1babca1c7b6547.xlsx]

## Sheet: Sheet1
Supplementary Data 9. List of high-confidence CRC-MYB complex-regulated target genes during nectary development.
crc St12	crc St13-14	CRC ChIP	myb St13-14	MYB57 ChIP	CRC-GFP ChIP-seq MYB57-GFP ChIP-seq (7602) crc St12 (305) crc St13-14 (451) myb triple	CRC-GFP ChIP-seq MYB57-GFP ChIP-seq (7602) crc St12 (305) crc St13-14 (451)	CRC-GFP ChIP-seq MYB57-GFP ChIP-seq (7602) crc St12 (305) myb triple	CRC-GFP ChIP-seq MYB57-GFP ChIP-seq (7602) crc St13-14 (451) myb triple	CRC-GFP ChIP-seq crc St12 (305) crc St13-14 (451) myb triple	MYB57-GFP ChIP-seq (7602) crc St12 (305) crc St13-14 (451) myb triple	CRC-GFP ChIP-seq MYB57-GFP ChIP-seq (7602) crc St12 (305)	CRC-GFP ChIP-seq MYB57-GFP ChIP-seq (7602) crc St13-14 (451)	CRC-GFP ChIP-seq MYB57-GFP ChIP-seq (7602) myb triple	CRC-GFP ChIP-seq crc St12 (305) crc St13-14 (451)	CRC-GFP ChIP-seq crc St12 (305) myb triple	CRC-GFP ChIP-seq crc St13-14 (451) myb triple	MYB57-GFP ChIP-seq (7602) crc St12 (305) crc St13-14 (451)	MYB57-GFP ChIP-seq (7602) crc St12 (305) myb triple	MYB57-GFP ChIP-seq (7602) crc St13-14 (451) myb triple	crc St12 (305) crc St13-14 (451) myb triple	CRC-GFP ChIP-seq MYB57-GFP ChIP-seq (7602)	CRC-GFP ChIP-seq crc St12 (305)	CRC-GFP ChIP-seq crc St13-14 (451)	CRC-GFP ChIP-seq myb triple	MYB57-GFP ChIP-seq (7602) crc St12 (305)	MYB57-GFP ChIP-seq (7602) crc St13-14 (451)	MYB57-GFP ChIP-seq (7602) myb triple	crc St12 (305) crc St13-14 (451)	crc St12 (305) myb triple	crc St13-14 (451) myb triple	CRC-GFP ChIP-seq	MYB57-GFP ChIP-seq (7602)	crc St12 (305)	crc St13-14 (451)	myb triple
AT1G69180	AT2G39060	AT1G01010	AT1G66120	AT1G28440	AT2G22680	AT1G09210	AT1G04770	AT1G79700	AT4G31820	AT2G30650	AT5G10980	AT4G37760	AT4G29950	AT5G44630	AT1G70270	AT1G24100	AT5G10180	AT5G50160	AT3G05640	AT1G53490	AT2G43120	AT3G04990	AT5G10430	AT3G25717	AT1G49430	AT5G14380	AT5G35715	AT3G27940	AT5G44020	AT5G42180	AT5G53660	AT5G44860	AT1G09815	AT5G16970	AT5G19720
AT4G29030	AT1G69180	AT1G01040	AT1G09155	AT1G03910	AT2G26580	AT5G47060	AT1G02340	AT4G22780	AT4G35480	AT5G24270	AT5G19290	AT4G34750	AT1G72450	AT2G36190	AT3G49570	AT3G14990	AT5G46750	AT3G51240	AT5G18860	AT4G37870	AT3G18710	AT1G07790	AT1G77210	AT5G14440	AT2G28760	AT1G22370	AT3G63470	AT4G21100	AT2G20870	AT1G33055	AT1G12980	AT4G03450	AT1G52500	AT3G58010	AT1G45223
AT3G08770	AT3G25810	AT1G01060	AT4G00950	AT1G28490	AT2G36090	AT2G46680	AT1G51680	AT2G38940		AT1G70830	AT3G18780	AT2G23690	AT5G61960	AT3G54820	AT2G36120	AT5G57785		AT5G13930	AT1G56660	AT1G62500	AT4G34580	AT3G60900	AT5G38120	AT3G44560	AT1G02110	AT5G17860	AT3G06890	AT1G22590	AT1G25530	AT2G37760	AT5G41480	AT4G26490	AT3G20670	AT5G59120	AT1G21310
AT5G44630	AT1G53480	AT1G01080	AT3G60780	AT1G28500	AT1G09560	AT1G12330	AT4G36220	AT1G78110			AT3G23830	AT2G46330	AT4G23710	AT5G46760	AT4G14130	AT5G15265		AT5G48180	AT3G27880	AT1G61810	AT4G25880	AT1G02300	AT5G43610	ATCG00430	AT3G07800	AT2G47040	AT2G47560	AT1G02020	AT5G60142	AT4G36988	AT5G15008	AT5G20050	AT4G35640	AT4G10265	AT3G28780
AT3G58780	AT1G18720	AT1G01100	AT4G34135	AT1G03930	AT1G71710	AT5G60760	AT1G15360	AT1G68825			AT2G46720	AT3G44735	AT1G04310	AT1G69180	AT4G18960	AT1G19640		AT2G16660	AT1G12805	AT1G53480	AT1G78930	AT5G59690	AT4G36090	AT3G63400	AT4G22540	AT2G37130	AT5G66080	AT1G06080	AT1G63710	AT1G78370	AT2G35480	AT1G09300	AT2G28740	AT1G77120	AT5G50011
AT4G21100	AT4G12530	AT1G01110	AT2G26750	AT1G28630	AT5G54160		AT2G36590	AT3G11430			AT2G28350	AT1G67900	AT1G10010	AT4G26850	AT2G04160	AT5G50950		AT4G29020	AT5G40780		AT3G07950	AT5G56300	AT1G23440	AT5G26220	AT5G67390	AT1G08465	AT3G51400	AT5G46740	AT4G20820	AT3G19710	AT1G12840	AT1G69810	AT5G47450	AT3G47480	AT1G05250
AT2G35310	AT1G53490	AT1G01120	AT3G10340	AT1G28680	AT5G22500		AT5G44620	AT5G44730			AT3G04010	AT4G33560	AT5G65470		AT4G26740	AT1G77110		AT2G34490	AT3G02020		AT1G71695	AT2G42840	AT5G24590	AT5G18270	AT1G71500	AT1G78460	AT1G18810	AT1G12350	AT5G24780	AT4G21850	AT2G37550	AT2G32710	AT5G40950	AT1G64130	AT1G24575
AT2G38110	AT2G36190	AT1G01130	AT5G26310	AT1G28960	AT1G32540		AT1G73600	AT1G09155			AT5G49100	AT1G70230	AT5G57670		AT2G03505	AT4G24130		AT3G49270	AT1G72645		AT1G08135	AT2G35310	AT1G24520	AT2G19190	AT5G59970	AT4G16130	AT2G26530	AT5G25120	AT5G32460	AT1G72290	AT5G23000	AT5G07300	AT1G14900	AT3G19400	AT1G09460
AT1G58430	AT1G23010	AT1G01140	AT1G44542	AT1G29060			AT2G27770	AT3G10340			AT2G18970	AT1G72430	AT5G28640		AT4G31330	AT3G21270			AT1G64370		AT5G07360	AT3G11000	AT2G40260	AT1G68470	AT1G72670	AT2G26690	AT1G76820	AT4G08480	AT4G19970	AT1G43800	AT1G35710	AT4G19380	AT3G46320	AT4G24580	AT1G53903
AT2G42830	AT4G00950	AT1G01160	AT1G23200	AT1G29070			AT1G62180	AT1G44542			AT5G10440	AT2G42570	AT1G69860		AT4G01410	AT2G39060			AT3G13520		AT5G46240	AT5G05080	AT4G24110	AT4G17490	AT2G37620	AT4G29310	AT1G10522		AT4G11080	AT1G49320	AT3G28960	AT4G22235	AT3G12320	AT3G05020	AT5G62750
AT5G23940	AT1G23300	AT1G01180	AT1G12080	AT1G01240			AT5G23940	AT1G03620			AT1G75590	AT4G24000	AT5G55120		AT5G24660	AT2G32150					AT3G48330	AT3G53190	AT4G37295	AT3G25730	AT5G64910	AT5G19550	AT3G08040		AT2G18050	AT4G34135	AT2G19580	AT5G26820	AT3G27360	AT5G62990	AT3G57510
AT1G12330	AT3G46160	AT1G01190	AT1G65970	AT1G29160			AT1G01490	AT5G54400			AT4G28080	AT4G36920	AT2G22470		AT2G26740	AT3G46160					AT5G52470	AT5G62000	AT5G10040	AT3G50810	AT4G00870	AT3G29370	AT4G16590		AT5G67110	AT3G01530	AT3G46790	AT1G10670	AT1G31335	AT3G10120	AT2G06050
AT5G46760	AT4G21100	AT1G01200	AT5G20830	AT1G29220			AT2G44830	AT4G04020			AT2G29980	AT5G47610	AT5G08450		AT2G26750	AT5G26340					AT4G32710	AT2G42800	AT1G07000	AT3G23090	AT3G08770	AT1G29460	AT5G09805		AT3G63300	AT5G52390	AT5G63060	AT3G49770	AT1G53070	AT5G22390	AT1G43650
AT2G26580	AT1G74020	AT1G01210	AT5G53550	AT1G29230				AT1G29510			AT2G42885	AT1G32170	AT1G65980			AT1G62480					AT1G14570	AT5G15530	AT3G18000	AT4G34970	AT5G05690	AT5G54800	AT2G45400		AT5G55720	AT4G19520	AT5G36790	AT1G54410	AT1G24020	AT1G63420	AT3G26840
AT2G22170	AT2G30650	AT1G01220	AT1G65875	AT1G03982				AT5G24580			AT5G63860	AT1G33440	AT1G80840			AT1G23300					AT4G34980	AT1G30600	AT4G36670	AT1G64980	AT1G29980	AT1G15260	AT1G25400		AT1G73602	AT1G17960	AT5G16440	AT5G19580	AT1G51170	AT2G14670	AT3G10450
AT3G05600	AT3G10040	AT1G01230	AT2G39060	AT1G29290				AT4G24120			AT2G38110	AT1G77080	AT5G58400			AT2G28110					AT3G44110	AT2G15090	AT5G63370	AT4G09030	AT5G10390	AT4G38860	AT2G39770		AT4G21990	AT5G07460	AT3G08510	AT4G22970	AT5G03680	AT5G49630	AT1G45215
AT1G23410	AT5G06720	AT1G01260	AT3G11430	AT1G29300				AT3G02550			AT1G21540	AT4G35080	AT1G75580			AT1G23200					AT1G56250	AT1G63480	AT1G01610	AT3G62010	AT2G35410	AT3G06770	AT1G62810		AT1G25340	AT3G26450	AT1G73860	AT5G06020	AT5G35490	AT4G03050	AT5G05340
AT5G46740	AT5G47060	AT1G01280	AT5G24580	AT1G29330				AT4G34050			AT1G19330	AT3G11110	AT5G16240			AT5G63160					AT3G16830	AT1G23410	AT5G56795	AT5G02190	AT5G59870	AT1G13110	AT3G12145		AT5G60200	AT5G05960	AT4G33210	AT1G05430	AT5G25090	AT5G44120	AT5G50800
AT5G22880	AT1G51340	AT1G01340	AT3G28917	AT1G29340				AT3G19680			AT5G10400	AT4G34680	AT1G70260			AT1G70680					AT2G38310	AT2G18740	AT1G65480	AT3G29810	AT1G77855	AT2G18300	AT1G33480		AT4G04830	AT3G10040	AT2G43750	AT2G39100	AT1G27590	AT5G45880	AT5G52750
AT5G22500	AT4G35480	AT1G01430	AT2G22800	AT1G29355				AT5G40350			AT2G16440	AT3G02310	AT2G40330			AT3G16400					AT5G03560	AT2G38230	AT3G49540	AT1G29440	AT2G33620	AT1G01290	ATCG00170		AT5G48850	AT5G52310	AT5G11200	AT4G23670	AT1G50110	AT4G22490	AT5G50720
AT2G42885	AT5G20830	AT1G01460	AT1G21920	AT1G04000				AT1G12320			AT2G16570	AT2G47280	AT4G18020			AT2G46650					AT1G76280	AT5G48485	AT4G35770	AT4G14680	AT3G15000	AT1G59620	AT5G22310		AT4G27570	AT1G19960	AT1G73360	AT4G28570	AT2G15120	AT3G62540	AT1G50990
AT1G53490	AT4G24110	AT1G01470	AT1G68825	AT1G29395				AT2G20880			AT2G45120	AT4G29905	AT2G45580			AT5G26310					AT1G80850	AT3G14740	AT2G47130	AT5G39420	AT5G46780	AT1G76240	AT1G71140			AT5G52640	AT1G10225	AT2G46225	AT4G02520	AT5G64770	AT5G22970
AT1G02020	AT4G22490	AT1G01500	AT2G45580	AT1G29400				AT5G06720			AT1G17190	AT1G02400	AT2G01830			AT3G25810					AT3G03350	AT1G13290	AT2G34790	AT1G76720	AT3G61850	AT1G64780	AT1G56110			AT5G33370	AT5G22720	AT1G47900	AT5G03545	AT1G22530	AT2G36325
AT4G35480	AT4G33560	AT1G01510	AT1G61680	AT1G29420				AT2G28840			AT2G42830	AT4G32870	AT5G61770			AT4G23010					AT5G62890	AT3G52820	AT1G12200	AT5G67060	AT5G20740	AT2G03120	AT4G10770			AT1G18590	AT1G75550	AT5G66440	AT4G37410	AT1G05310	AT5G24240
AT1G70270	AT1G43800	AT1G01520	AT1G23300	AT1G29430				AT4G39940			AT5G65360	AT4G33070	AT3G22420			AT1G65970					AT1G56233	AT4G16610	AT3G44990	AT1G70985	AT1G03410	AT1G53170	AT3G46620			AT3G58990	AT3G02780	AT4G35440	AT2G16260	AT2G18530	AT5G41740
AT1G53480	AT2G36090	AT1G01540	AT1G17950	AT1G29435				AT1G05100			AT5G14640	AT4G17800	AT2G14210			AT2G33510					AT5G47630	AT2G28790	AT4G04630	AT5G66400	AT2G16760	ATMG00580	AT5G07690			AT1G20470	ATCG00780	AT2G42780	AT5G45670	AT1G50290	AT2G33435
AT5G55720	AT5G54160	AT1G01550	AT3G25640	AT1G29450				AT5G53750			AT2G47910	AT5G48880	AT1G27940			AT3G25290					AT2G46620	AT3G05600	AT5G28300	AT1G05870	AT1G09200	AT3G45730	AT5G15950			AT5G28020	AT3G61050	AT5G57270	AT4G23750	AT4G18580	AT2G27430
AT5G09730	AT1G02020	AT1G01570	AT1G02470	AT1G29460				AT4G27450			AT5G01240	AT1G12420	AT3G28917			AT3G60780					AT4G27270	AT5G58280	AT5G65140	AT4G19645	AT1G58430	AT3G20300	AT3G23810			AT1G12090	AT2G36540	AT5G48120	AT5G63650	AT1G07600	AT3G05880
AT5G44620	AT2G18530	AT1G01600	AT5G24150	AT1G29465				AT2G38250			AT3G18550	AT2G25490	AT1G10410			AT3G62550					AT1G20650	AT5G10580	AT5G25890	AT5G52830		AT1G10470	AT2G23130			AT5G10625	AT5G57625	AT4G12540	AT5G51590	AT2G04170	AT5G58750
AT3G11000	AT4G35080	AT1G01620	AT3G27810	AT1G04010				AT2G18890			AT2G46980	AT5G06170	AT4G02940			AT5G55050					AT2G27920	AT5G06440	AT5G67340	AT5G11110			AT1G56580			AT5G24150	AT5G14370	AT4G34640	AT1G17200	AT5G52450	AT3G23270
AT1G03410	AT4G10270	AT1G01630	AT2G38940	AT1G29490				AT5G04860			AT4G27230	AT4G37790	AT1G77670			AT1G74020					AT1G08080	AT1G46480	AT3G10300	AT2G46360			AT1G06920			AT5G23010	AT4G25730	AT2G37260	AT2G04570	AT3G22620	AT1G52400
AT5G45670	AT3G19710	AT1G01650	AT5G17310	AT1G29510				AT5G14200			AT3G16980	AT2G47050	AT3G03780			AT1G80130					AT3G56070	AT3G16190	AT5G44350	AT5G22250			AT3G52740			AT5G38710	AT5G53620	AT3G08780	AT1G72970	AT4G28775	AT1G14880
AT2G16760	AT1G72290	AT1G01660	AT5G40450	AT1G29530				AT2G35920			AT5G03390	AT1G74840	AT1G77760			AT1G52342					AT5G15420	AT1G11600	AT2G38500	AT5G06320			AT5G06870			AT1G78780	AT4G10925	AT1G13030	AT1G11850	AT1G69490	AT4G14368
AT2G45920	AT3G25820	AT1G01680	AT1G30080	AT1G29630				AT1G18720			AT1G78000	AT2G44980	AT1G07200			AT1G06160					AT1G80870	AT4G26150	AT5G66985	AT1G07220			AT2G22360			AT4G23600	AT4G03340	AT5G66420	AT4G08910	AT5G40960	AT2G32290
AT3G54560	AT3G25830	AT1G01690	AT5G25970	AT1G29640				AT4G19420			AT2G16676	AT5G14330	AT4G17670								AT5G67570	AT5G23100	AT5G24655	AT1G80050			AT3G01690			AT5G15120	AT3G27970	AT3G02740	AT3G53940	AT4G25940	AT1G19630
AT1G24020	AT4G33070	AT1G01695	AT2G44480	AT1G01250				AT2G14750			AT2G41680	AT3G50700	AT2G19800								AT1G75310		AT1G35260	AT1G28130			AT5G27920			AT2G16060	AT3G09990	AT2G38860	AT4G23800	AT4G17030	AT3G22235
AT1G09210	AT5G65110	AT1G01700	AT4G10310	AT1G29660				AT2G22800			AT2G31070	AT3G48100	AT1G78476								AT1G14315			AT5G50670			AT4G16360			AT2G43100	AT2G18910	AT3G06130	AT3G51290	AT1G66570	AT3G03280
AT3G60900	AT2G26580	AT1G01710	AT1G18720	AT1G29700				AT4G29010			AT3G55880	AT3G14270	AT2G23060								AT5G67360			AT5G50120			AT1G22380			AT1G62560	AT1G31760	AT3G27090	AT4G23680	AT2G39250	AT3G03341
AT1G60060	AT3G19700	AT1G01720	AT3G05640	AT1G29750				AT1G76890			AT1G01320	AT5G56870	AT3G61190								AT3G52460			AT4G16160			AT2G01080			AT1G28230	AT1G77130	AT1G17744	AT4G13690	AT2G16200	AT3G50120
AT5G65360	AT5G11090	AT1G01740	AT4G12530	AT1G29860				AT4G00950			AT1G76410	AT2G39800	AT1G70700								AT5G04130			AT4G34630			AT1G54575			AT3G19700	AT4G38140	AT3G17140	AT5G22750	AT3G55646	AT1G30530
AT4G20820	AT3G45140	AT1G01760	AT3G28007	AT1G29880				AT3G25640			AT3G48990	AT3G23170	AT5G05270								AT4G26240			AT3G19550			AT1G20330			AT1G69880	AT1G69430	AT4G28600	AT5G49020	AT2G22190	AT5G14070
AT3G17160	AT4G29010	AT1G01790	AT4G09644	AT1G29930				AT3G61890			AT4G24050	AT4G38410	AT1G72510								AT3G55380			AT2G40480			AT5G40450			AT3G03190	AT3G05660	AT4G39820	AT4G23810	AT3G28580	AT3G28300
AT1G09560	AT1G75750	AT1G01800	AT5G14780	AT1G29950				AT1G23010			AT3G58780	AT1G03610	AT2G26695								AT3G51910			AT3G07850			AT3G53980			AT1G76650	AT2G37230	AT3G20920	AT3G45930	AT2G41260	AT3G54030
AT3G45930	AT1G23200	AT1G01830	AT3G50410	AT1G04050				AT1G70670			AT1G59650	AT1G75750	AT2G45760								AT1G12790			AT4G30140			AT5G56220			AT1G67100	AT2G26990	AT3G05545	AT3G63130	AT4G08555	AT3G13227
AT1G15360	AT1G12330	AT1G01840	AT4G38810	AT1G29980				AT4G30530			AT3G16180	AT4G15530	AT5G43600								AT1G33250			AT4G37430			AT2G35470			AT4G24275	AT1G31470	AT3G02230	AT4G29030	AT4G10270	AT1G37130
AT2G30650	AT2G43100	AT1G01880	AT4G35190	AT1G04080				AT5G20830			AT1G14770	AT3G13310	AT1G30320								AT2G28405			AT5G50130			AT4G37140			AT1G59700	AT5G60215	AT2G25250	AT3G54180	AT3G47650	AT5G42957
AT2G04570	AT2G14247	AT1G01910	AT1G51340	AT1G30010				AT1G55330			AT5G42680	AT2G41640	AT2G31110								AT5G50000			AT1G48280			AT1G35190			AT1G16410	AT1G51230	AT5G42110	AT5G54600	AT1G22230	AT5G10030
AT2G42840	AT3G02020	AT1G01940	AT1G65690	AT1G30040				AT1G51340			AT3G54000	AT4G34760	AT5G09970								AT4G37180			AT3G30180			AT5G55660			AT4G34290	AT1G09960	AT4G21470	AT5G13840	AT1G05680	AT2G21140
AT1G65370	AT1G12320	AT1G01970	AT4G04020	AT1G30070				AT4G36990			AT4G34730	AT5G62430	AT3G63088								AT1G80290			AT3G10370			AT4G25810			AT4G13770	AT4G27370	AT3G06040	AT5G09730	AT3G26330	AT2G01300
AT5G23420	AT1G20470	AT1G01980	AT1G62480	AT1G30080				AT5G65110			AT5G62140	AT1G70890	AT1G75280								AT2G37390			AT3G45780			AT2G37540			AT3G49120	AT5G62720	AT3G08700	AT1G65370	AT4G17340	AT4G28550
AT4G27570	AT4G37980	AT1G01990	AT4G15960	AT1G30090				AT4G17900			AT2G26180	AT3G26520	AT1G18200								AT3G54830			AT3G16840			AT1G50460			AT5G26000	AT1G02000	AT1G51440	AT3G02210	AT1G74820	AT3G19660
AT3G46320	AT3G48000	AT1G02000	AT2G28110	AT1G30100				AT5G21105			AT1G68862	AT3G49930	AT5G59730								AT5G15730			AT5G46050			AT4G24220			AT5G24770	AT2G02820	AT4G27800	AT3G25480	AT2G07688	AT4G31110
AT5G46750	AT1G77110	AT1G02060	AT1G69860	AT1G30110				AT2G32510			AT3G05830	AT2G28400	AT5G62070								AT4G27260			AT4G29930			AT3G53920			AT5G39890	AT3G61870	AT3G50370	AT1G32670	AT3G13400	AT4G30280
AT5G54160	AT5G43610	AT1G02065	AT5G50120	AT1G30120				AT1G77590				AT5G58650	AT4G30460								AT1G10120			AT4G27480			AT4G38650			AT4G11320	AT1G33330	AT5G61900	AT5G59910	AT2G38640	AT3G46613
AT5G20740	AT1G09210	AT1G02080	AT2G39980	AT1G30130				AT2G20610				AT3G57040	AT2G38530								AT1G75810			AT1G01060			AT4G15800			AT3G22740	AT4G28340	AT3G03850	AT5G55690	AT3G25830	AT1G60270
AT5G50160	AT3G60780	AT1G02100	AT1G19640	AT1G04105				AT5G11090				AT1G07430	AT1G32910								AT5G20250			AT5G53320			AT5G47220			AT5G15140	AT1G63430	AT3G07568	AT2G42990	AT3G11230	AT3G24510
AT1G59650	AT1G12805	AT1G02120	AT2G41370	AT1G30230				AT5G07010				AT5G43260	AT3G54730								AT1G80720			AT2G34670			AT5G01075			AT4G14040	AT4G03820	AT5G05810	AT4G21590	AT1G35230	AT3G01185
AT4G31330	AT1G65970	AT1G02130	AT5G45940	AT1G30280				AT4G12530				AT5G65080	AT4G31800								AT1G69770			AT1G58110			AT1G69890			AT1G65860	AT1G08610	AT4G32830	AT5G23760	AT3G17998	AT1G68280
AT5G10400	AT1G74820	AT1G02140	AT1G22640	AT1G30320								AT5G11060	AT3G03440								AT1G08460			AT4G00335			AT2G46600			AT1G56100	AT4G28130	AT1G49490	AT2G27970	AT2G38900	AT4G02860
AT4G19970	AT3G13310	AT1G02145	AT1G77110	AT1G30330								AT1G01480	AT5G06860								AT2G26330			AT1G08000			AT5G60030			AT2G43550	AT5G26680	AT5G56950	AT5G03870	AT2G18360	AT5G41120
AT3G20670	AT1G19640	AT1G02160	AT5G37170	AT1G30350								AT2G41905	AT5G52900								AT2G18950			AT2G18730			AT1G66400			AT1G74090	AT1G51745	AT4G35620	AT2G22170	AT2G39310	AT2G45450
AT4G31820	AT5G40350	AT1G02170	AT1G12805	AT1G30360								AT5G66690	AT3G19030								AT2G39280			AT1G72960			AT5G58320			AT3G45140	AT5G14030	AT5G62830	AT2G18969	AT4G21800	ATMG00480
AT3G04010	AT5G38120	AT1G02180	AT1G23010	AT1G30380								AT1G09810	AT1G75960								AT1G69295			AT3G16510			AT1G08500				AT1G48953	AT3G53860	AT1G07820	AT1G52280	AT3G51860
AT5G59690	AT3G21270	AT1G02205	AT5G22500	AT1G04130								AT5G01300	AT1G79110								AT2G01940			AT1G05960			AT2G43290				AT3G59870	AT5G18830	AT3G54560	AT4G30110	AT1G66960
AT1G77855	AT1G77080	AT1G02230	AT3G53300	AT1G30400								AT2G17880	AT5G58787								AT3G50670			AT4G04610			AT4G25620				AT4G11020	AT3G62780	AT1G74790	AT5G66630	AT2G37010
AT5G60142	AT1G12350	AT1G02290	AT3G62550	AT1G01260								AT5G10140	AT1G10020								AT1G21730			AT1G17950			ATCG00490				AT1G47317	AT1G26400	AT2G14900	AT5G17450	AT1G36370
AT5G59910	AT2G14670	AT1G02320	AT1G60390	AT1G04140								AT2G30040	AT4G23990								AT2G41810			AT5G38130			AT5G05590				AT5G44320	AT4G23860	AT5G25130	AT3G01270	AT1G08230
AT2G45120	AT5G24580	AT1G02350	AT5G50012	AT1G30440								AT1G20980	AT1G69870								AT3G23310			AT5G66040			AT1G02070				AT1G06740	AT2G24420	AT3G27280	AT1G66240	AT4G17520
AT1G70830	AT3G16400	AT1G02360	AT5G50011	AT1G30490								AT5G45550	AT1G10650								AT1G80790			AT1G77100			AT1G20190				AT4G29940	AT1G22150	AT5G22880	AT1G59730	AT3G17060
AT1G11600	AT3G03190	AT1G02380	AT5G50010	AT1G30500								AT1G07590	AT5G42650								AT1G79710			AT3G50310			AT5G58770				AT2G33540	AT3G16500	AT1G60060	AT2G42380	AT4G12890
AT4G37409	AT3G10340	AT1G02390	AT3G44250	AT1G30510									AT1G57680								AT5G15050			AT1G63460			AT2G37580				AT2G25610	AT3G54900	AT2G21790	AT2G32550	AT2G31670
AT2G14900	AT1G09155	AT1G02410	AT1G23090	AT1G30560									AT1G56240								AT4G37290			ATCG01130			AT2G40113				AT5G02610	AT1G10250	AT5G61030	AT1G67865	AT1G56680
AT3G49270	AT3G58990	AT1G02450	AT1G25230	AT1G30570									AT2G48010								AT1G75730			AT1G48100			AT5G59290				AT4G32470	AT5G25480	AT2G28720	AT3G48280	AT2G07723
AT1G07820	AT5G24270	AT1G02460	AT1G21310	AT1G30620									AT1G18730								AT2G40900			AT2G32560			AT3G05910				AT3G11270	AT1G55650	AT5G44635	AT5G23020	AT3G44300
AT1G62500	AT2G35920	AT1G02470	AT2G02610	AT1G04160									AT2G32240								AT1G04930			AT1G56600			AT1G14440				AT5G20290	AT1G51710	AT5G23420	AT3G48000	AT2G15042
AT5G10390	AT2G38940	AT1G02475	AT1G29230	AT1G30690									AT3G17120								AT4G29330			AT5G50915			AT5G25460				AT2G47790	AT5G20130	AT4G02060	AT5G17700	AT5G22430
AT4G14130	AT5G56870	AT1G02490	AT3G06330	AT1G30780									AT2G36810								AT3G15360			AT2G18550			AT1G14260				AT5G14530	AT4G18550	AT3G46940	AT5G53250	AT2G43018
AT5G48180	AT5G46750	AT1G02500	AT4G14550	AT1G30810									AT2G39660								AT3G08530			AT2G30490			AT2G29350				AT2G39415	AT1G53645	AT1G32450	AT5G03930	AT4G39955
AT5G59870	AT1G03620	AT1G02510	AT3G54340	AT1G30825									AT4G36520								AT3G22380			AT1G64200			AT2G07180				AT1G22630	AT5G52630	AT5G56500	AT3G57690	AT3G10930
AT2G36590	AT4G04020	AT1G02560	AT5G50080	AT1G04170									AT5G19100								AT2G41835			AT4G30650			AT4G12560				AT5G23090	AT1G09930	AT1G07370	AT1G62333	AT4G21930
AT2G28740	AT4G22780	AT1G02610	AT2G19800	AT1G04190									AT2G33570								AT4G34790			AT5G46800			AT5G25110				AT3G52760	AT4G02510	AT4G37409	AT4G12030	ATMG00660
AT3G49570	AT2G38900	AT1G02620	AT5G35715	AT1G31040									AT2G39980								AT1G09140			AT3G09560			AT5G49760				AT3G28210	AT2G31360	AT1G07660	AT3G25820	AT2G01990
AT2G15090	AT4G14040	AT1G02640	AT4G24130	AT1G31120									AT5G50010								AT3G54500			AT1G14890			AT1G63090				AT2G07684	AT3G28420	AT3G45980	AT1G04250	AT4G00670
AT4G18960	AT5G39890	AT1G02660	AT4G34138	AT1G31130									AT5G65920								AT2G45130			AT1G72280			AT4G13540				AT1G30640	AT1G20840	AT1G62780	AT2G17710	AT1G52827
AT4G23810	AT1G44970	AT1G02670	AT4G23920	AT1G31150									AT2G16890								AT5G39510			AT2G42900			AT1G17360				AT1G13700	AT1G45050	AT2G45920	AT5G39160	AT2G21890
AT5G25120	AT3G54820	AT1G02690	AT3G53720	AT1G31290									AT4G30074								AT4G32660			AT1G66380			AT5G08330				AT2G40950	AT1G51790	AT5G06150	AT5G64000	AT4G37470
AT2G20870	AT1G16410	AT1G02720	AT5G40360	AT1G31300									AT3G03170								AT2G15300			AT5G38320			AT3G17330				AT5G21930	AT3G61920	AT2G28380	AT4G38840	AT5G15970
AT4G24050	AT4G39940	AT1G02740	AT1G23020	AT1G04210									AT1G01600								AT2G36060			AT3G46300			AT3G23000				AT1G51320	AT5G45095	AT2G36730	AT1G44970	AT5G53588
AT5G48485	AT3G28580	AT1G02780	AT5G27000	AT1G31350									AT4G13100								AT4G16545			AT1G50325			AT5G09440				AT1G07500	AT2G46280	AT2G46730	AT4G11070	AT3G46650
AT1G02300	AT1G62560	AT1G02800	AT1G33480	AT1G01280									AT5G02260								AT5G48360			AT4G18950			AT1G07050				AT3G12910	AT3G15548	AT2G27040	AT1G06830	AT3G15790
AT2G46680	AT1G62480	AT1G02816	AT4G31820	AT1G31360									AT5G57790								AT3G04860			AT4G24805			AT3G16470				AT2G28960	AT1G01150	AT4G39330	AT5G57880	ATCG00820
AT1G06080	AT1G68825	AT1G02830	AT4G38950	AT1G04230									AT4G25990								AT5G60190			AT1G56210			AT3G43720				AT3G48680	AT3G62900	AT3G15270	AT4G18540	AT1G10530
AT4G36220	AT5G42180	AT1G02840	AT2G36090	AT1G04240									AT5G20950								AT1G03905			AT1G72940			AT5G52320				AT3G63360	AT4G32780	AT4G16690	AT2G22540	AT1G69520
AT2G42990	AT5G06170	AT1G02880	AT4G16360	AT1G04260									AT1G21910								AT1G22070			AT2G37460			AT1G76360				AT3G18010	AT5G66760	AT3G17160	AT4G19500	AT5G35405
AT3G45980	AT2G16060	AT1G02900	AT5G11090	AT1G31840									AT4G39800								AT1G19870			AT2G38400			AT4G02130				AT2G48100	AT5G47550		AT5G39580	AT4G17940
AT5G58280	AT2G37130	AT1G02940	AT5G63530	AT1G04280									AT3G63160								AT2G40750			AT5G50570			AT1G67330				AT5G63260	AT5G47510		AT2G14247	AT1G21590
AT5G25090	AT2G32510	AT1G02960	AT2G40610	AT1G31880									AT4G30440								AT3G10010			AT3G06035			AT2G34500				AT4G28510	AT2G29900		AT3G54600	AT4G25340
AT1G12350	AT4G10265	AT1G03030	AT1G32540	AT1G31910									AT1G71830								AT3G09920			AT1G20823			AT5G27980				AT5G05050	AT1G26650		AT1G33960	AT5G56320
AT4G37410	AT1G59730	AT1G03040	AT2G17470	AT1G31940									AT2G38750								AT1G64180			AT2G31160			AT1G53300				AT1G01510	AT4G11220		AT4G14480	AT3G13760
AT1G07660	AT1G05680	AT1G03060	AT2G35920	AT1G04290									AT3G14810								AT5G65130			AT3G20390			AT1G06620				AT3G36659	AT1G27090		AT4G01680	AT1G75040
AT4G13690	AT3G19680	AT1G03080	AT4G01770	AT1G32060									AT5G48610								AT1G29880			AT4G30520			AT5G37170				AT2G01330	AT3G52090		AT4G12970	AT3G28770
AT4G39330	AT2G17710	AT1G03110	AT5G10030	AT1G32090									AT3G02400								AT1G26940			AT2G31150			AT5G03150				AT4G33020	AT3G08970		AT5G02090	AT3G52620
AT1G13290	AT5G26310	AT1G03150	AT1G33270	AT1G04300									AT2G01850								AT5G10110			AT1G69790			AT2G01200				AT3G58970	AT4G11790		AT3G11930	AT1G14130
AT3G18550	AT2G41905	AT1G03160	AT5G52830	AT1G32170									AT3G01980								AT3G14290			AT1G10560			AT1G76040				AT1G05670	AT5G43320		AT3G26140	AT3G10460
AT5G24660	AT5G55050	AT1G03180	AT3G21270	AT1G04310									AT5G06390								AT4G37690			AT3G45160			AT5G61520				AT5G66240	AT1G73980		AT5G35111	AT2G23010
AT5G03680	AT5G49630	AT1G03200	AT1G60740	AT1G01290									AT3G27400								AT1G18800			AT3G27025			AT3G47540				AT4G18380	AT2G18720		AT5G39190	AT2G19000
AT5G67110	AT4G37870	AT1G03220	AT1G18810	AT1G32340									AT5G19730								AT3G54300			AT1G51660			AT2G44578				AT2G16710	AT3G51780		AT4G37980	AT4G11653
AT4G26740	AT5G24590	AT1G03230	AT5G54400	AT1G04350									AT2G42580								AT2G20835			ATCG00440			AT4G24630				AT1G13635	AT1G74620		AT4G10260	AT4G22050
AT5G48850	AT3G44990	AT1G03250	AT1G77100	AT1G32360									AT5G10300								AT3G02910			AT5G67150			AT4G27560				AT2G29080	AT1G29450		AT5G55450	AT4G24810
AT4G08910	AT1G63420	AT1G03300	AT1G30820	AT1G32400									AT1G64060								AT4G33040			AT5G08790			AT1G28270				AT3G07680	AT5G15680		AT1G49940	AT4G04030
AT5G40950	AT2G33510	AT1G03365	AT1G75110	AT1G32440									AT1G01800								AT1G10430			AT5G42230			AT3G49550				AT4G27430	AT5G63910		AT1G11785	AT4G32212
AT1G49430	AT1G66570	AT1G03430	AT1G69850	AT1G01300									AT5G65710								AT3G01820			AT2G34310			AT3G56400				AT3G22320	AT2G30470		AT5G19160	AT3G26830
AT2G03505	AT1G05100	AT1G03457	AT3G55870	AT1G04370									AT5G67210								AT1G05260			AT1G15380			AT2G13610				AT5G22820	AT4G21350			AT2G22930
AT5G62000	AT5G59120	AT1G03470	AT2G36950	AT1G32460									AT3G55690								AT1G64110			AT1G75680			AT5G14700				AT2G44440	AT5G26751			AT1G04430
AT2G22680	AT1G07430	AT1G03475	AT3G13760	AT1G32500									AT2G40610								AT5G47050			ATMG01090			AT1G76550				AT4G30993	AT1G03090			AT5G65900
AT1G09200	AT5G46760	AT1G03490	AT3G23460	AT1G32540									AT1G17840								AT5G15410			AT2G19860			AT5G09980				AT1G16430	AT3G59110			AT4G03926
AT2G36730	AT1G70890	AT1G03510	AT1G15380	AT1G32550									AT3G19000								AT4G05150			AT1G21722			AT1G61800				AT2G16580	AT2G31800			AT2G37180
AT5G59970	AT1G23440	AT1G03530	AT1G56680	AT1G32630									AT1G20440								AT5G20660			AT3G01630			AT4G39980				AT4G34350	AT3G03110			AT4G14030
AT4G02060	AT5G60760	AT1G03560	AT2G29090	AT1G32690									AT5G41790								AT4G03635			AT1G18020			AT1G01250				AT4G28640	AT3G19960			AT1G80820
AT3G53190	AT1G77590	AT1G03600	AT2G26580	AT1G04390									AT1G50040								AT1G01500			AT2G43020			AT1G22882				AT2G40710	AT3G14820			AT2G40650
AT3G55880	AT4G31820	AT1G03680	AT5G06720	AT1G32730									AT3G57450								AT5G01450			AT1G65690			AT5G28910				AT3G23630	AT2G46420			AT1G70840
AT1G22590	AT1G70680	AT1G03730	AT1G72830	AT1G32910									AT1G70940								AT4G34200			AT1G60390			AT1G60190				AT2G02930	AT2G36420			AT1G69480
AT4G23680	AT4G24275	AT1G03740	AT3G43430	AT1G32920									AT2G41820								AT4G35025			AT3G08860			AT3G49580				AT1G26570	AT5G53330			AT1G20920
AT4G02520	AT4G16130	AT1G03750	AT1G78780	AT1G32928									AT1G74300								AT5G60580			AT4G01720			AT5G19240				AT3G28922	AT5G11050			AT5G49640
AT1G78000	AT2G22190	AT1G03760	AT1G76780	AT1G32930									AT3G23460								AT3G57400			AT5G61810			AT4G17500				AT1G04120	AT1G07270			AT3G30385
AT5G42680	AT1G10470	AT1G03770	AT3G01980	AT1G01310									AT3G53300								AT2G39760			AT2G27990			AT3G07720				AT3G14880	AT3G12050			AT2G39518
AT3G15270	AT1G24520	AT1G03780	AT4G29010	AT1G33230									AT1G77420								AT5G41490			AT4G22010			AT3G14680				AT2G18900	AT1G69818			AT3G24535
AT5G56300	AT3G05020	AT1G03790	AT2G01900	AT1G33240									AT5G62220								AT2G22345			AT1G03230			AT4G32180				AT1G01760	AT4G25350			AT4G05100
AT2G27970	AT1G09560	AT1G03800	AT2G40113	AT1G33250									AT1G52190								AT5G13180			AT2G31010			AT4G24680				AT1G76970	AT1G60230			AT4G27870
AT4G21590	AT4G34750	AT1G03830	AT3G30180	AT1G33420									AT5G07220								AT3G57440			AT2G44300			AT3G30380				AT1G64455	AT2G33270			AT1G23850
AT2G26180	AT1G64370	AT1G03840	AT3G30122	AT1G33440									AT5G11740								AT5G16950			AT4G33300			AT4G00330				AT4G15540	AT4G35880			AT4G31020
AT1G11850	AT4G13770	AT1G03850	AT2G02640	AT1G33470									AT5G38980								AT1G50640			AT2G34600			AT3G52370				AT3G29760	AT2G39445			AT2G07811
AT2G28790	AT5G26340	AT1G03860	AT1G22380	AT1G33480									AT5G23850								AT3G14360			AT4G16670			AT3G06830				AT3G01680	AT4G38480			AT2G42530
AT3G16180	AT5G26000	AT1G03870	AT5G02200	AT1G33500									AT3G63200								AT3G22100			AT3G01540			AT5G54170				AT3G62140	AT1G73460			AT1G11770
AT2G38230	AT5G24655	AT1G03905	AT1G73830	AT1G04480									AT1G27370								AT5G20300			AT2G40435			AT5G16000				AT1G30550	AT3G54826			AT5G15110
AT3G14740	AT3G25640	AT1G03940	AT5G23370	AT1G04510									AT1G67560								AT3G01550			AT1G19770			AT1G01070				AT3G49470	AT2G02520			AT3G23250
AT1G14900	AT4G15530	AT1G03982	AT3G47350	AT1G34000									AT1G74430								AT4G34840			AT1G20510			AT1G14700				AT1G52080	AT1G67590			AT1G19550
AT5G61030	AT2G28840	AT1G04000	AT1G14720	AT1G04540									AT3G55980								AT1G71110			AT2G45950			AT3G48780				AT2G19490	ATMG01350			AT5G37660
AT4G35640	AT5G10430	AT1G04020	AT3G17330	AT1G04550									AT2G21650								AT1G69980			AT1G05170			AT1G57990				AT2G07641	AT1G01770			AT2G27470
AT2G28720	AT3G13520	AT1G04050	AT1G67830	AT1G34120									AT3G54990								AT4G38730			AT1G08200			AT1G03050				AT1G63030	AT3G45252			AT3G10720
AT5G19290	AT1G78780	AT1G04080	AT2G17500	AT1G04555									AT4G18360								AT1G18150			AT2G17470			AT5G57560				AT4G30720	AT3G24340			AT2G43530
AT3G25480	AT1G72430	AT1G04120	AT1G20070	AT1G34245									AT3G07360								AT3G25700			AT5G23370			AT2G24210				AT1G73740	AT1G80315			AT1G35910
AT2G46720	AT5G14200	AT1G04130	AT1G74300	AT1G04570									AT1G01690								AT1G69420			AT2G40400			AT5G65480				AT1G29260	AT5G59010			AT5G42860
AT2G26740	AT3G02550	AT1G04150	AT3G01345	AT1G34420									AT3G44260								AT3G62620			AT3G04000			AT4G22690				AT4G32320	AT4G18270			AT1G76800
AT1G17200	AT1G67865	AT1G04160	AT3G33528	AT1G04590									AT3G28007								AT4G39420			AT4G03175			AT5G65280				AT2G40360	AT1G56500			AT1G70850
AT2G16570	AT1G79700	AT1G04190	AT5G54160	AT1G34550									AT1G74660								AT4G32850			AT1G68190			AT1G44350				AT1G08810	AT1G60850			AT3G56275
AT4G26150	AT5G23010	AT1G04210	AT3G01690	AT1G34570									AT3G15820								AT3G45600			AT4G23920			AT1G74950				AT4G02930	AT1G12615			AT5G42955
AT4G27230	AT1G12420	AT1G04230	AT2G36290	AT1G34670									AT3G44200								AT4G25670			AT3G50770			AT5G53890				AT3G48810	AT5G06930			AT1G76960
AT2G29980	AT5G19550	AT1G04260	AT1G70670	AT1G34760									AT1G78040								AT1G62515			AT3G16560			AT5G15960				AT4G01360	AT5G48220			AT4G18290
AT1G19330	AT5G10625	AT1G04280	AT1G77590	AT1G04610									AT5G54390								AT5G37790			AT4G02280			AT5G47910				AT1G12340	AT1G17147			AT1G08440
AT3G04990	AT2G28110	AT1G04310	AT2G33480	AT1G35160									AT4G38810								AT3G10320			AT5G59580			AT1G29395				AT3G59845	AT4G33220			AT1G17430
AT1G30600	AT5G47610	AT1G04350	AT4G24120	AT1G01320									AT1G75110								AT5G13320			AT1G57760			AT2G20340				AT5G67320	AT3G48550			AT3G20210
AT2G27040	AT3G48100	AT1G04360	AT3G14990	AT1G35190									AT5G05440								AT4G30410			AT3G17390			AT2G29440				AT3G52590	AT1G76050			AT1G09932
AT1G02110	AT3G05640	AT1G04410	AT5G65710	AT1G35255									AT5G12330								AT3G61780			AT5G63550			AT4G39950				AT5G52550	AT1G29750			AT2G07707
AT4G29020	AT5G25120	AT1G04440	AT1G04660	AT1G35430									AT2G38610								AT5G42290			AT1G47610			AT3G16390				AT1G73570	AT4G23490			AT2G37870
AT5G24780	AT4G14480	AT1G04480	AT3G63088	AT1G35460									AT5G13750								AT4G37580			AT1G35140			AT5G05600				AT3G56470	AT3G42860			AT2G07777
AT3G54000	AT2G43550	AT1G04510	AT1G19790	AT1G01335									AT1G25230								AT1G65820			AT1G55120			AT4G15440				AT5G60400	AT5G61210			AT5G15948
AT3G51240	AT4G08480	AT1G04520	AT1G18510	AT1G35510									AT5G55620								AT1G30070			AT5G27520			AT1G61680				AT1G21560	AT4G17890			AT2G38470
AT4G23800	AT1G33055	AT1G04540	AT5G46050	AT1G04680									AT5G58670								AT5G07160			AT1G69940			AT4G36540				AT1G20696	AT4G33360			AT5G34881
AT3G23830	AT1G62333	AT1G04550	AT1G05170	AT1G35560									AT5G43700								AT4G16780			AT1G01340			ATMG00030				AT1G08630	AT3G23580			AT3G06433
AT1G46480	AT3G62540	AT1G04570	AT1G09460	AT1G35580									AT2G30090								AT5G58940			AT3G23290			AT3G21190				AT5G50115	AT1G05900			AT3G14780
AT2G36090	AT5G17860	AT1G04580	AT5G44790	AT1G04690									AT5G56530								AT3G01970			AT1G65890			AT4G33960				AT5G45790	AT5G17210			AT5G65020
AT1G51680	AT1G13110	AT1G04590	AT2G27770	AT1G35780									AT3G05690								AT2G47400			AT1G09390			AT2G30550				AT2G35610	AT5G23540			AT3G47590
AT2G33620	AT2G22800	AT1G04610	AT2G30520	AT1G04750									AT3G02280								AT5G01890			AT3G52060			AT1G75900				AT3G58840	AT5G40240			AT1G14455
AT4G21990	AT4G08555	AT1G04635	AT5G65110	AT1G04770									AT5G57010								AT1G61730			AT4G10310			AT4G30610				AT3G18430	AT3G14400			AT3G15950
AT2G18050	AT4G17030	AT1G04680	AT1G43800	AT1G04778									AT4G18700								AT1G08040			AT1G03300			AT4G12730				AT2G02710	AT3G52070			AT2G07711
AT5G13930	AT5G10040	AT1G04690	AT2G45300	AT1G04780									AT5G45940								AT5G49460			AT5G35926			AT5G66200				AT1G25500	AT5G63190			AT1G14120
AT5G49100	AT1G71710	AT1G04700	AT5G65210	AT1G04790									AT3G07390								AT3G26810			AT1G20070			AT5G07500				AT5G10290	AT4G35460			AT3G59010
AT5G03545	AT2G17880	AT1G04710	AT2G30090	AT1G04810									AT3G61060								AT5G53280			AT3G12500			AT5G08750				AT2G46200	AT3G03120			AT1G18350
AT2G16260	AT5G65080	AT1G04730	AT5G37260	AT1G01030									AT5G09870								AT2G12462			AT2G27080			AT2G27690				AT3G32980	AT4G31570			AT1G58270
AT2G18969	AT1G76650	AT1G04750	AT1G14260	AT1G04910									AT5G57050								AT1G69580			AT5G63980			AT1G16850				AT3G25030	AT1G13300			AT2G23260
AT5G06150	AT1G22530	AT1G04778	AT1G62770	AT1G04930									AT2G39420								AT1G04570			AT5G12890			AT4G18440				AT4G06676	AT5G10370			AT4G21640
AT4G08480	AT4G24120	AT1G04780	AT5G38320	AT1G01355									AT5G27150								AT3G26512			AT3G06330			AT2G38170				AT4G21600	AT4G19410			AT3G12143
AT4G16610	AT5G01300	AT1G04790	AT3G44200	AT1G04950									AT4G34230								AT5G20840			AT5G55010			AT3G05400				AT5G48710	AT1G01090			AT4G25750
AT5G24270	AT1G24100	AT1G04810	AT4G19170	AT1G04970									AT1G72180								AT5G09850			AT4G16350			AT5G17590				AT1G26800	AT5G13870			AT3G59930
AT2G36120	AT4G12970	AT1G04820	AT1G35190	AT1G01360									AT3G50690								AT1G01830			AT3G23150			AT5G21960				AT5G51260	AT3G23255			AT3G33528
AT1G51170	AT3G26140	AT1G04860	AT1G76890	AT1G04990									AT3G22275								AT2G36400			AT5G65210			AT4G39490				AT5G14250	AT4G26570			AT1G57777
AT5G15530	AT1G64780	AT1G04920	AT1G79180	AT1G05000									AT2G47180								AT1G78080			AT5G58660			AT1G52030				AT3G54110	AT1G42470			AT5G63450
AT2G42800	AT4G30110	AT1G04930	AT3G11690	AT1G05010									AT4G27652								AT1G02475			AT2G01913			AT2G48020				AT4G38010	AT3G26932			AT5G22320
AT2G37620	AT5G23020	AT1G04950	AT2G39710	AT1G05065									AT5G01840								AT1G71440			AT2G33480			AT2G47340				AT1G56720	AT5G03260			AT3G56170
AT5G10580	AT5G07460	AT1G04960	AT5G46115	AT1G05070									AT2G36320								AT3G02050			AT1G69840			AT2G22330				AT1G53510	AT4G19810			AT3G46520
AT4G11080	AT4G17900	AT1G04990	AT2G32240	AT1G01370									AT5G50080								AT1G74510			AT1G17620			AT2G34070				AT1G50020	AT5G17847			AT1G66370
AT3G63300	AT3G48280	AT1G05010	AT5G61960	AT1G05100									AT5G17490								AT3G54920			AT5G13550			AT5G60890				AT5G04475	AT1G56300			ATMG00590
AT1G25530	AT1G65480	AT1G05070	AT5G22310	AT1G05136									AT2G33170								AT1G66150			AT1G55265			AT4G20830				AT1G20350	AT1G59820			AT5G27780
AT5G25130	AT3G11430	AT1G05085	AT5G24270	AT1G05180									AT5G01610								AT3G62630			AT4G15550			AT1G77885				AT3G13600	AT1G15215			AT2G24850
AT5G01240	AT4G34135	AT1G05087	AT2G23060	AT1G05240									AT4G39320								AT5G41730			AT1G80110			AT2G32990				AT5G59880	AT3G17030			AT1G05620
AT5G46780	AT4G36988	AT1G05090	ATMG00480	AT1G05260									AT3G09590								AT3G10985			AT1G67300			AT3G23450				AT4G32050	AT4G27950			AT3G23570
AT3G54180	AT4G36990	AT1G05120	AT2G07707	AT1G05300									AT5G64740								AT1G75000			AT2G23610			AT4G08170				AT4G00690	AT1G01300			AT5G62210
AT3G63130	AT1G22370	AT1G05140	AT4G37750	AT1G01420									AT1G14720								AT5G18130			AT2G29450			AT5G16290				AT4G08160	AT1G48050			AT3G47510
AT5G14640	AT3G22740	AT1G05170	AT2G36320	AT1G05340									AT2G28640								AT2G31740			AT3G50930			AT5G49800				AT3G13222	AT5G08240			AT5G46540
AT1G72670	AT2G18360	AT1G05180	AT2G26695	AT1G41830									AT1G74100								AT1G44740			AT1G17420			AT5G47960				AT5G63620	AT1G70590			AT1G02810
AT5G60760	AT5G44630	AT1G05190	AT5G39890	AT1G05350									AT1G80120								AT1G08005			AT5G58350			AT1G67950				AT4G30400	AT5G28490			AT3G10890
AT4G37870	AT2G41640	AT1G05240	AT1G68280	AT1G05370									AT5G67160								AT1G13350			AT5G15840			AT2G21940				AT3G05050	AT5G10790			AT2G18230
AT1G17190	AT2G46650	AT1G05260	AT5G42230	AT1G05380									AT1G69780								AT3G62200			AT4G35310			AT3G44720				AT4G24900	AT5G07070			AT5G17090
AT1G72970	AT5G33370	AT1G05270	AT4G13100	AT1G05385									AT4G39030								AT2G40290			AT4G27280			AT3G62700				AT1G61270	AT1G11380			AT3G48650
AT5G55690	AT2G20610	AT1G05300	AT1G63180	AT1G05400									AT1G61215								AT4G27510			AT3G02570			AT5G10946				AT1G14750	AT5G23950			AT5G24490
AT1G76410	AT5G38710	AT1G05320	AT5G09970	AT1G01430									AT2G28085								AT3G19830			AT1G69850			AT3G44550				AT1G12760	AT2G28630			AT3G46970
AT1G75590	AT1G78370	AT1G05340	AT4G15550	AT1G05410									AT4G32410								AT1G68500			AT4G17260			AT3G10525				AT1G56570	AT2G01950			AT4G04840
AT2G15120	AT4G19520	AT1G05350	AT4G36220	AT1G42440									AT1G01120								AT5G12430			AT5G23210			AT3G13910				AT5G15540	AT1G01240			AT4G20140
AT5G63860	AT1G01480	AT1G05360	AT5G53320	AT1G05430									AT1G20450								AT5G66320			AT5G40850			AT2G47190				AT4G00120	AT4G00180			AT3G28820
AT4G23750	AT1G01610	AT1G05370	AT2G07783	AT1G42470									AT4G31550								AT1G74860			AT4G24140			AT1G76160				AT4G01995	AT3G18210			AT2G23910
AT1G32450	AT3G49120	AT1G05380	AT3G28980	AT1G42480									AT2G41630								AT3G07030			AT1G70090			AT3G46540				AT4G21320	AT1G75780			AT5G06750
AT2G36190	AT3G57690	AT1G05410	AT2G28840	AT1G01440									AT1G18740								AT1G15500			AT2G18280			AT1G07135				AT2G47960	AT3G05720			AT4G37340
AT4G01410	AT4G01680	AT1G05470	AT3G28050	AT1G05450									AT3G22970								AT3G28910			AT1G49160			AT5G64330				ATCG01250	AT4G16540			AT2G34820
AT2G46730	AT5G11060	AT1G05490	AT5G35926	AT1G05470									AT1G23020								AT3G06150			AT1G29050			AT5G23860				AT4G19050	AT1G55805			AT3G48500
AT5G51590	AT1G69880	AT1G05540	AT5G58960	AT1G42990									AT3G05490								AT5G19770			ATCG01040			AT4G26630				AT4G00530	AT1G48260			AT4G16730
AT2G34490	AT5G53750	AT1G05560	AT3G01472	AT1G05490									AT2G26040								AT3G52750			AT5G14360			AT3G48240				AT2G35240	AT5G61570			AT1G67290
AT2G46980	AT5G22500	AT1G05570	AT3G01470	AT1G43690									AT3G25890								AT4G27310			AT4G21680			AT5G02200				AT5G23750	AT1G11100			AT5G05365
AT2G16440	AT3G22620	AT1G05575	AT1G65980	AT1G44100									AT5G56360								AT2G39725			AT1G78560			AT2G34810				AT1G18310	AT4G34950			AT5G43518
AT5G64910	AT5G63160	AT1G05660	AT3G63200	AT1G44170									AT3G11690								AT1G13245			AT3G16720			AT4G34138				AT3G13870	AT2G16005			AT5G50790
AT4G34730	AT1G55330	AT1G05670	AT4G37340	AT1G44350									AT1G75220								AT5G41910			AT1G33270			AT1G14290				AT1G04710	AT5G64280			AT1G78480
AT2G28350	AT5G39580	AT1G05700	AT1G03620	AT1G44542									AT1G23710								AT5G54062			AT5G35200			ATMG00830				AT4G25160	AT3G03540			AT5G54710
AT2G47910	AT1G80130	AT1G05710	AT1G20190	AT1G44740									AT4G32890								AT1G75230			AT1G72920			AT5G02940				AT1G21150	AT3G09940			AT3G11080
AT1G50110	AT4G21850	AT1G05783	ATMG00520	AT1G44760									AT1G12080								AT5G26030			AT5G01870							AT1G62420	AT4G34100			AT5G48140
AT3G53940	AT1G77210	AT1G05785	AT1G14700	AT1G44810									AT2G35950								AT3G10760			AT1G76780							AT5G59480	AT5G57870			AT3G30383
AT4G00870	AT1G03610	AT1G05805	AT5G10170	AT1G05660									AT5G65207								AT4G03190			AT2G41415							AT2G45110	AT1G07470			AT5G05730
AT1G63710	AT5G05960	AT1G05860	AT2G32235	AT1G44900									AT5G17310								AT3G56660			AT2G41800							AT3G58710	AT1G15950			AT1G19570
AT3G05830	AT1G06080	AT1G05870	AT5G54510	AT1G45050									AT2G41370								AT3G27540			AT4G26190							AT2G46890	AT4G10630			AT4G33550
AT5G47450	AT1G28230	AT1G05890	AT2G41050	AT1G45130									AT5G13640								AT5G62760			AT4G33540							AT5G16130	AT5G51410			AT4G30660
AT3G27280	AT1G56100	AT1G05930	ATMG00660	AT1G45170									AT4G14990								AT3G18035			AT2G32160							AT3G54460	AT4G04640			AT4G32610
AT3G15000	AT1G32170	AT1G05940	AT1G56240	AT1G05700									AT5G58960								AT5G03110			AT1G20160							AT3G28330	AT1G58360			AT5G07110
AT5G62140	AT1G17960	AT1G05960	AT5G37740	AT1G45230									AT4G09460								AT5G56550			AT1G04580							AT1G06700	AT2G05810			AT2G41475
AT2G18970	AT1G65860	AT1G05970	AT1G68795	AT1G46768									AT1G64970								AT5G44670			AT3G17580							AT1G04730	AT2G46640			AT1G73325
AT1G09815	AT1G32540	AT1G06000	AT1G69870	AT1G47128									AT5G61430								AT5G09950			AT4G12910							AT1G75520	AT3G25540			AT5G13990
AT4G28080	AT4G19420	AT1G06045	AT4G19645	AT1G47130									AT4G30340								AT5G55560			AT1G78680							AT5G54750	AT3G18680			AT1G65875
AT2G04160	AT3G06770	AT1G06070	AT2G03090	AT1G47200									AT2G40130								AT3G52960			AT2G36270							AT4G09900	AT1G72880			AT2G07663
AT3G12320	AT1G70670	AT1G06110	AT4G17670	AT1G47210									AT3G56360								AT5G65820			AT2G19850							AT5G57130	AT1G19010			AT5G44400
AT5G06440	AT4G04630	AT1G06148	AT5G28640	AT1G47230									AT3G52430								AT2G28560			AT2G07671							AT5G47180	AT1G23160			AT4G19030
AT3G18780	AT1G22230	AT1G06170	AT5G15120	AT1G47260									AT1G52880								AT1G63855			AT5G57655							AT5G04810	AT5G19260			AT1G14390
AT1G68862	AT2G46680	AT1G06180	AT2G07712	AT1G05790									AT2G22770								AT1G01710			AT2G26440							AT2G32000	AT5G18065			AT5G44720
AT1G71710	AT3G49930	AT1G06190	AT1G70720	AT1G01470									AT1G79840								AT4G28170			ATMG00530							AT2G47220	AT2G41700			AT2G13770
AT2G41680	AT5G15265	AT1G06200	AT3G02280	AT1G47330									AT5G14000								AT1G29630			AT3G28180							AT4G13345	AT3G01880			AT2G07677
AT4G16690	AT2G47280	AT1G06230	AT1G51330	AT1G47340									AT3G07340								AT1G73960			AT2G46950							AT5G21274	AT4G21820			AT2G20142
AT5G23760	AT3G27940	AT1G06290	AT2G07747	AT1G47490									AT3G50800								AT5G37730			AT4G35180							AT5G65250	AT1G55020			AT1G06100
AT1G04770	AT3G47480	AT1G06310	AT1G61215	AT1G47497									AT5G03360								AT5G63660			AT3G17600							AT4G36250	AT5G46620			AT5G51480
AT4G04830	AT5G66690	AT1G06340	AT5G45950	AT1G05805									AT5G59780								AT2G35960			AT2G39650							AT1G73370	AT4G38570			AT4G08870
AT1G21540	AT2G39310	AT1G06380	AT5G39050	AT1G47530									AT1G63010								AT3G10845			AT2G46960							AT5G11480	AT1G02790			AT2G07717
AT5G10440	AT4G19500	AT1G06400	AT3G23270	AT1G47550									AT5G54510								AT2G33400			AT3G50640							AT5G01015	AT3G26934			AT1G70210
AT2G31070	AT2G26690	AT1G06410	AT1G30400	AT1G47740									AT2G43780								AT5G47730			AT1G68620							AT3G15010	AT2G34925			ATMG00520
AT3G61850	AT5G15120	AT1G06420	AT1G06550	AT1G47870									AT4G35320								AT3G12010			AT2G18260							AT2G01540	AT4G19590			AT1G70580
AT5G44020	AT4G03050	AT1G06475	AT3G17580	AT1G47900									AT2G42610								AT5G03210			AT4G09640							AT1G02380	AT4G00980			AT2G28900
AT4G26850	AT5G10140	AT1G06500	AT2G30370	AT1G05860									AT1G78490								AT2G45830			AT3G13660							AT4G17895	AT5G18950			AT4G01080
AT3G46940	AT1G74840	AT1G06515	AT3G03440	AT1G47970									AT1G18210								AT2G02180			AT1G28060							AT5G06200	AT3G20870			AT2G45940
AT1G32670	AT3G20300	AT1G06520	AT5G25110	AT1G01480									AT1G49600								AT2G39570			AT5G41780							AT1G56320	ATCG00470			AT2G27315
AT2G16676	AT1G52342	AT1G06530	AT3G10040	AT1G48020									AT5G19900								AT1G17500			AT3G26440							AT2G39130	AT1G22040			AT1G31173
AT5G35490	AT1G74090	AT1G06550	AT5G65310	AT1G48050									AT1G05240								AT3G60030			AT1G21400							AT5G06040	AT2G18880			AT2G35760
AT1G07370	AT1G07000	AT1G06580	AT3G55730	AT1G05890									AT3G55120								AT3G14010			AT2G35840							AT5G62270	AT5G20730			AT1G14170
AT5G03870	AT4G30530	AT1G06590	AT1G51680	AT1G48260									AT1G08570								AT3G16117			AT3G27660							AT2G45650	AT1G02220			AT3G25500
AT2G26750	AT5G66985	AT1G06660	AT4G34560	AT1G48320									AT2G44480								AT1G80080			AT5G20900							AT4G08980	AT5G64790			AT4G24170
AT1G31335	AT1G70830	AT1G06680	AT4G04040	AT1G48325									AT3G29575								AT2G47470			AT3G09760							AT2G41705	AT4G34720			ATMG01080
AT3G27360	AT1G35260	AT1G06700	AT5G23960	AT1G48330									AT1G69040								AT5G57350			AT2G30860							AT3G17040	AT3G09400			AT3G22231
AT5G13840	AT3G11230	AT1G06710	AT2G43470	AT1G05900									AT1G49130								AT1G72170			AT1G66140							AT3G03180	AT4G32070			AT5G15310
AT1G29980	AT1G01290	AT1G06740	AT3G23290	AT1G48370									AT1G08920								AT3G06370			AT2G21130							AT1G17370	AT4G16143			AT4G36500
AT1G14770	AT5G21105	AT1G06760	AT2G39420	AT1G48410									AT3G14840								AT1G77980			AT1G51330							AT3G25655	AT5G61170			AT1G07900
AT3G16980	AT5G24770	AT1G06780	AT3G01530	AT1G05910									AT1G06475								AT2G40340			AT3G62860							AT1G71900	AT3G63052			AT3G14200
AT1G07790	AT3G57040	AT1G06790	AT1G56210	AT1G48430									AT4G33565								AT4G37950			AT1G18510							AT1G07130	AT4G29350			AT1G21680
AT5G10980	AT4G23010	AT1G06800	AT1G13430	AT1G48460									AT3G17820								AT3G59990			AT5G25970							AT3G51190	AT4G30290			AT2G25790
AT5G54600	AT3G13400	AT1G06850	AT5G40350	AT1G48480									AT2G19780								AT5G64570			AT4G15030							AT5G65850	AT5G47020			AT4G13263
AT1G01320	AT5G03930	AT1G06910	AT2G07709	AT1G48490									AT5G17230								AT1G01230			AT1G76600							AT1G04820	AT2G24615			AT2G32340
AT2G27770	AT3G44735	AT1G06923	AT1G17030	AT1G01490									AT4G31380								AT2G27930			AT3G22750							AT2G03340	AT5G01360			AT4G27590
AT5G05080	AT3G01270	AT1G06970	AT1G08650	AT1G48580									AT5G46200								AT3G06290			AT1G52770							AT5G45110	AT4G24470			AT3G14040
AT1G73602	AT5G28300	AT1G06980	AT1G68190	AT1G48590									AT5G63970								AT2G34770			AT1G67830							AT4G16890	AT5G14020			AT1G55260
AT1G73600	AT5G44730	AT1G06990	AT2G21730	AT1G48620									AT5G63380								AT4G35100			AT1G51700							AT2G03290	AT1G47260			AT4G31910
AT1G62780	AT5G24150	AT1G07020	AT2G18160	AT1G48635									AT1G64900								AT1G45170			AT2G27500							AT3G11720	AT1G07720			AT2G28780
AT3G54820	AT5G18860	AT1G07040	AT2G18162	AT1G48770									AT3G14380								AT1G12430			AT1G68795							AT1G16210	AT1G16420			AT1G32900
AT1G01490	AT5G52390	AT1G07070	AT2G07811	AT1G48850									AT1G24170								AT4G24780			AT3G24420							AT4G17840	AT3G45190			AT1G28610
AT5G56500	AT1G33440	AT1G07090	AT4G39480	AT1G49130									AT2G36830								AT4G22580			AT3G11450							AT5G55860	AT1G26310			AT3G18777
AT3G51290	AT3G27880	AT1G07110	AT5G40170	AT1G49170									AT1G69530								AT3G52360			AT5G41380							AT1G30210	AT5G17950			AT3G52490
AT1G53070	AT3G29370	AT1G07130	AT3G63470	AT1G49200									AT4G37260								AT5G66820			AT4G39480							AT5G16060	AT5G12360			AT2G32140
AT2G16660	AT4G35770	AT1G07140	AT2G14210	AT1G06000									AT5G63530								AT1G22180			AT3G14870							AT2G36200	AT3G12380			AT5G17760
AT3G52820	AT2G20880	AT1G07150	AT3G28790	AT1G49225									AT3G45970								AT3G60190			AT4G27520							AT5G13970	AT1G08540			AT5G49280
AT1G63480	AT3G14990	AT1G07170	AT5G24240	AT1G06010									AT1G72520								AT5G19380			AT2G32487							AT5G50870	AT3G49600			AT1G72260
AT1G25340	AT2G39800	AT1G07180	AT2G32510	AT1G49400									AT1G51940								AT4G14230			AT1G06550							AT1G66500	AT1G71460			AT2G46100
AT5G44635	AT4G18540	AT1G07200	AT3G13660	AT1G49420									AT3G14560								AT1G04790			AT1G63180							AT2G26050	AT1G74810			AT1G04220
AT1G61810	AT2G40260	AT1G07210	AT3G22970	AT1G49430									AT3G28050								AT2G41440			AT1G72910							AT2G34140	AT3G10500			AT5G40260
AT4G22540	AT5G45880	AT1G07220	AT2G47560	AT1G06045									AT4G08950								AT3G57560			AT3G01345							AT3G07570	AT1G72490			AT2G21750
AT1G71500	AT5G48880	AT1G07240	AT5G49760	AT1G49450									AT1G70720								AT2G44080			AT5G07770							AT3G08636	AT2G44520			AT4G26940
AT1G02340	AT2G18300	AT1G07260	AT1G78960	AT1G49480									AT2G38240								AT3G02270			AT5G02750							AT2G44560	AT1G12920			AT1G58460
AT1G32540	AT1G62500	AT1G07280	AT1G17960	AT1G49490									AT1G71720								AT2G39210			AT4G39350							AT1G07350	AT2G30010			AT1G45145
AT3G07800	AT5G28020	AT1G07350	AT1G66140	AT1G49510									AT3G50410								AT1G73690			AT2G04190							AT5G34850	AT5G33300			AT1G49640
AT5G49020	AT5G52450	AT1G07380	AT3G07010	AT1G49560									AT4G27250								AT3G61150			AT3G61880							AT4G20340	AT1G11420			AT5G43440
AT1G74790	AT2G47050	AT1G07420	AT3G22420	AT1G49600									AT3G50060								AT2G38090			AT3G13662							AT4G33330	AT1G61210			AT2G26250
AT3G02210	AT1G56660	AT1G07460	AT1G21830	AT1G49620									AT2G39710								AT4G25640			AT3G08490							AT3G54140	AT3G17450			AT3G30340
AT5G67390	AT1G06830	AT1G07500	AT5G25460	AT1G06070									AT3G05200								AT3G12970			AT5G41020							AT1G73400	AT2G15580			AT3G16520
AT1G27590	AT2G46330	AT1G07510	AT4G18020	AT1G49660									AT1G29330								AT5G52990			AT3G14830							AT5G11425	AT5G64540			AT5G17540
AT2G35410	AT3G50700	AT1G07530	AT1G70680	AT1G49710									AT4G26690								AT5G05430			AT5G19060							AT3G23010	AT3G12587			AT4G20970
AT5G23100	AT1G59620	AT1G07540	AT3G10525	AT1G49720									AT1G75390								AT3G61980			AT1G73010							AT3G62390	AT3G07170			AT2G01900
AT1G52500	AT2G32550	AT1G07550	AT5G14070	AT1G49740									AT1G73830								AT5G08530			AT1G14360							AT5G02100	AT1G03930			AT3G18530
AT2G28380	AT4G29310	AT1G07570	AT3G09070	AT1G49750									AT5G47230								AT4G29790			AT4G22130							ATMG00320	AT3G46480			AT1G65440
AT3G48990	AT5G19160	AT1G07610	AT5G26320	AT1G49760									AT5G62350								AT5G24530										AT1G30660	AT4G02120			AT1G57775
AT1G62180	AT2G47040	AT1G07620	AT1G08000	AT1G49780									AT4G19230								AT3G02885										AT1G18550	AT1G73340			AT5G05170
AT5G22750	AT4G34680	AT1G07630	AT3G24100	AT1G49790									AT5G54680								AT1G22050										AT1G67850	AT1G79050			AT5G50335
AT5G05690	AT5G44120	AT1G07650	AT3G22968	AT1G01500									AT2G46860								AT5G13360										AT3G26180	AT2G28470			AT3G09910
AT2G18740	AT5G64000	AT1G07645	AT1G01490	AT1G49800									AT2G47810								AT5G65165										AT1G57860	AT3G13130			AT4G37050
AT5G32460	AT4G34290	AT1G07670	AT2G18280	AT1G49840									AT1G12000								AT4G03070										AT5G24560	AT1G23050			AT4G25845
AT2G21790	AT1G35230	AT1G07680	AT3G47960	AT1G49920									AT4G28270								AT5G01230										AT1G71050	AT2G01690			AT1G21525
AT2G28760	AT4G38410	AT1G07725	AT5G54550	AT1G50030									AT5G25280								AT5G65730										AT4G30080	AT3G17750			AT2G25810
AT5G63650	AT1G50290	AT1G07745	AT4G16670	AT1G50040									AT5G58620								AT3G05320										AT3G10360	AT1G29465			AT2G29710
AT2G44830	AT2G25490	AT1G07770	AT1G49130	AT1G06110									AT3G50530								AT4G30500										AT3G07565	AT2G43150			AT5G25980
AT5G60200	AT1G11785	AT1G07780	AT5G59500	AT1G50160									AT1G63840								AT4G18390										AT3G09020	AT2G25910			AT1G05200
AT3G16190	AT3G55646	AT1G07810	AT3G52060	AT1G50200									AT5G60450								AT3G13340										AT5G58390	AT4G04885			AT5G43580
AT5G03390	AT4G23600	AT1G07830	AT2G33170	AT1G50280									AT4G11280								AT2G42760										AT1G25180	AT3G43540			AT1G47470
AT3G27940	AT5G10180	AT1G07870	AT1G04310	AT1G06140									AT1G68800								AT4G39850										AT5G13295	AT2G46710			AT4G11310
AT5G10180	AT2G28400	AT1G07880	AT4G16350	AT1G50370									AT2G30870								AT3G56210										AT1G34630	AT3G43270			AT3G05760
AT5G47060	AT1G78460	AT1G07885	AT2G40130	AT1G50420									AT2G30020								AT1G78380										AT5G65600	AT1G50840			AT1G76810
	AT5G58650	AT1G07902	AT5G57660	AT1G06150									AT3G09770								AT3G04290										AT3G09520	AT1G58420			AT2G30930
	AT1G12200	AT1G07920	AT1G28290	AT1G50450									AT3G52900								AT4G39340										AT3G12610	ATMG01130			AT5G44390
	AT3G45730	AT1G07930	ATCG00170	AT1G50460									AT5G04340								AT1G32928										AT3G22800	AT2G44195			AT5G13800
	AT2G38640	AT1G07940	AT2G26740	AT1G50600									AT4G01060								AT1G70740										AT5G04900	AT4G20230			AT4G09467
	AT3G54600	AT1G07950	ATMG01370	AT1G50620									AT4G30270								AT1G68400										AT4G15890	AT2G03240			AT1G32520
	AT2G38250	AT1G07980	AT4G37390	AT1G50640									AT3G02500								AT4G17050										AT2G41945	AT1G11110			AT2G32885
	AT3G10300	AT1G07990	AT4G11760	AT1G06148									AT2G39700								AT5G17820										AT4G18910	AT1G04390			AT5G05210
	AT2G34790	AT1G08000	AT5G44730	AT1G50830									AT4G36950								AT3G60120										AT4G01320	AT1G18610			AT2G21590
	ATMG00580	AT1G08005	AT4G39490	AT1G50840									AT2G47440								AT5G54140										AT1G54250	AT3G49350			ATMG00820
	AT1G08465	AT1G08010	AT2G27430	AT1G06170									AT4G33950								AT5G46170										AT5G62580	AT1G76994			AT3G52800
	AT1G49320	AT1G08030	AT1G79110	AT1G06180									AT4G16146								AT4G33870										AT2G30710	AT1G64140			AT5G04190
	AT4G26850	AT1G08040	AT4G30950	AT1G51060									AT5G16570								AT5G61460										AT1G67510	AT3G58220			AT1G61120
	AT1G07590	AT1G08070	AT1G68800	AT1G51130									AT5G20190								AT2G34160										AT1G20300	AT3G62690			AT4G29570
	AT4G32870	AT1G08080	AT3G06433	AT1G51140									AT5G11950								AT5G43840										AT2G25160	AT4G32970			AT5G49180
	AT5G04860	AT1G08100	AT5G60030	AT1G51160									AT3G55870								AT4G13010										AT5G60960	AT1G66680			AT4G04810
	AT2G18890	AT1G08110	AT1G75390	AT1G06200									AT3G16570								AT3G51960										AT4G33250	AT5G12120			AT2G13620
	AT3G11110	AT1G08130	AT2G01913	AT1G51200									AT1G78960								AT4G16580										AT2G01290	AT1G71170			AT2G46450
	AT4G34050	AT1G08135	AT3G14172	AT1G51340									AT1G24530								AT4G12640										AT5G26360	AT1G63470			AT1G48600
	AT1G06160	AT1G08165	AT1G29490	AT1G51400									AT5G53930								AT3G23590										AT3G61770	AT3G48720			AT1G31550
	AT1G04250	AT1G08180	AT4G27590	AT1G51440									AT2G22660								AT1G14510										AT2G24170	AT5G21090			AT3G16410
	AT1G66240	AT1G08190	AT2G21170	AT1G51450									AT1G49450								AT1G06800										AT4G38060	AT1G33230			AT5G54720
	AT1G07600	AT1G08200	AT4G25845	AT1G51460									AT5G53550								AT4G39010										AT3G08960	AT1G14755			AT1G28600
	AT1G76240	AT1G08220	AT1G01340	AT1G51500									AT1G51500								AT5G56990										AT5G64840	AT1G55110			AT4G29210
	AT1G22590	AT1G08250	AT5G65410	AT1G51510									AT1G18460								AT3G57540										AT3G24310	AT2G44610			AT5G55980
	AT4G38860	AT1G08270	AT1G20440	AT1G51560									AT5G39050								AT5G03040										AT4G04601	AT4G11050			AT1G45221
	AT1G18590	AT1G08320	AT3G48240	AT1G51570									AT1G23080								AT1G68340										AT5G53070	AT1G21470			AT3G50970
	AT1G09810	AT1G08340	AT5G17590	AT1G51640									AT5G67300								AT2G24550										AT2G32250	AT1G72160			AT5G02170
	AT1G52280	AT1G08350	AT1G75388	AT1G51670									AT1G67720								AT2G47260										AT5G07130	AT3G26710			AT4G10060
	AT5G63370	AT1G08400	AT5G28650	AT1G51680									AT4G30190								AT2G41410										AT3G22430	AT5G63460			AT2G16895
	AT4G24000	AT1G08420	AT2G21650	AT1G51690									AT1G29490								AT1G04280										AT5G65980	ATMG00060			AT2G33810
	AT1G20980	AT1G08460	AT2G19860	AT1G51710									AT5G16190								AT5G14390										AT2G20450	AT2G46430			AT4G12400
	AT2G22680	AT1G08470	AT1G29510	AT1G51720									AT4G35190								AT5G03240										AT1G12450	AT1G26945			AT5G37980
	AT1G05310	AT1G08490	AT5G43580	AT1G51790									AT5G55850								AT1G63850										AT1G32650	AT1G66220			AT4G37150
	AT1G70230	AT1G08510	AT5G55920	AT1G06290									AT2G21300								AT5G53905										AT4G34220	AT3G24800			AT3G11990
	AT4G24580	AT1G08520	AT5G57120	AT1G51940									AT4G01070								AT5G06700										AT1G11125	AT2G41460			AT3G62720
	AT5G62430	AT1G08560	AT5G11110	AT1G51950									AT5G54200								AT1G79420										AT3G45590	AT2G30230			AT5G52120
	AT5G39160	AT1G08570	AT1G54200	AT1G51965									AT1G19670								AT4G39070										AT2G19880	AT5G09350			AT5G19230
	AT5G02090	AT1G08590	AT3G12580	AT1G51980									AT4G19170								AT4G39390										AT1G05320	AT3G12810			AT1G12780
	AT1G59700	AT1G08610	AT2G18890	AT1G06340									AT5G58900								AT3G15530										AT1G07540	AT2G39020			AT4G29780
	AT5G39190	AT1G08630	AT3G46160	AT1G52030									AT1G66120								AT3G55750										AT1G03790	AT4G17695			AT4G08025
	AT1G29460	AT1G08640	AT5G58620	AT1G52150									AT3G54340								AT2G27775										AT1G22065	AT3G02100			AT2G05540
	AT2G37760	AT1G08650	AT4G35480	AT1G06360									AT1G79180								AT3G60860										AT5G06290	AT4G15415			AT1G74210
	AT1G78110	AT1G08660	AT5G02260	AT1G52190									AT1G73210								AT5G14350										AT5G66631	ATMG00160			AT3G28980
	AT1G77120	AT1G08680	AT1G49310	AT1G06380									AT3G11700								AT2G26590										AT3G57760	AT3G25585			AT1G80760
	AT3G61890	AT1G08710	AT5G62350	AT1G01540									AT1G76790								AT3G02920										AT5G65800	AT5G44220			AT3G44320
	AT4G24130	AT1G08720	AT2G01080	AT1G06390									AT2G30370								AT3G14550										AT5G58190	AT1G14140			AT1G53885
	AT5G46740	AT1G08760	AT2G16060	AT1G52290									AT4G30470								AT2G34650										AT4G28760	AT4G31280			AT1G07750
	AT2G22540	AT1G08780	AT3G28830	AT1G06400									AT5G67480								AT1G78820										AT1G75210	AT3G25960			AT2G47460
	AT2G32150	AT1G08800	AT4G39260	AT1G06410									AT1G73540								AT4G33910										AT1G57600	AT5G02430			AT3G60420
	AT5G65140	AT1G08810	AT1G22410	AT1G52565									AT2G37640								AT2G43060										AT5G06120	AT5G40550			AT1G23540
	AT3G11930	AT1G08820	AT3G02550	AT1G06420									AT3G01470								AT3G51150										AT1G55680	AT4G04910			AT1G70500
	AT1G61810	AT1G08910	AT1G21000	AT1G52618									AT2G01180								AT3G57990										AT1G04410	AT5G24480			AT4G24380
	AT3G25290	AT1G08920	AT2G30650	AT1G52690									AT3G11580								AT4G19700										AT2G23400	AT3G53020			AT3G26235
	AT4G17340	AT1G08960	AT2G31380	AT1G06430									AT1G11840								AT2G16430										AT1G15165	AT5G18240			AT5G34887
	AT2G04170	AT1G08970	AT5G61520	AT1G52730									AT5G43760								AT1G16270										AT2G47770	AT3G53830			AT5G04370
	AT5G15140	AT1G09040	AT2G39700	AT1G52760									AT5G58000								AT5G07760										AT2G07050	AT4G36080			AT4G11510
	AT3G58010	AT1G09050	AT1G69530	AT1G52857									AT3G62640								AT3G10330										AT3G18390	AT1G17560			AT3G03520
	AT1G76890	AT1G09070	AT5G12330	AT1G52855									AT1G06000								AT2G16400										AT2G02220	AT1G68520			AT4G38400
	AT3G49540	AT1G09140	AT2G07717	AT1G52880									AT5G45960								AT2G44660										AT1G53250	AT1G18850			AT2G43970
	AT5G22390	AT1G09230	AT1G70210	AT1G06470									AT3G16150								AT2G43880										AT3G18050	AT3G29152			AT1G30820
	AT5G64770	AT1G09245	AT5G10280	AT1G52890									AT4G37390								AT1G30330										AT5G55856	AT1G48430			AT1G03710
	AT2G42570	AT1G09330	AT3G25730	AT1G06475									AT3G09070								AT1G30360										AT2G44510	AT4G13850			AT1G43600
	AT5G14330	AT1G09390	AT1G12780	AT1G53040									AT3G14172								AT5G23395										AT3G11470	AT2G34320			AT4G04040
	AT2G23690	AT1G09430	AT4G09460	AT1G06490									AT1G64720								AT5G57720										AT4G39160	AT2G39930			AT5G36220
	AT3G23170	AT1G09480	AT5G49800	AT1G53090									AT5G67180								AT4G34370										AT2G42130	AT4G31470			AT3G23240
	AT5G07010	AT1G09490	AT4G36410	AT1G53110									AT3G43430								AT1G34000										AT3G61230	AT4G24740			AT3G50280
	AT4G10260	AT1G09520	AT1G79700	AT1G53165									AT2G36290								AT5G05700										AT3G61090	AT3G22700			AT4G17250
	AT1G64130	AT1G09530	AT4G32890	AT1G53170									AT1G78570								AT5G66740										AT1G60940	AT2G37090			AT3G28345
	AT1G19960	AT1G09550	AT3G23150	AT1G53190									AT1G19220								AT3G02470										AT1G66180	AT2G25600			AT4G01895
	AT5G17700	AT1G09570	AT1G48300	AT1G53200									AT5G45340								AT5G13090										AT3G23220	AT3G08910			AT5G26660
	AT5G17450	AT1G09575	AT1G79840	AT1G53210									AT3G62150								AT5G22770										AT2G22480	AT5G35930			AT3G21800
	AT5G57880	AT1G09580	AT1G66380	AT1G53230									AT3G25780								AT3G51370										AT3G44340	AT5G01060			AT1G11580
	AT4G12030	AT1G09620	AT3G07280	AT1G53290									AT5G61270								AT3G53990										AT3G13920	AT3G04880			AT1G60240
	AT4G25940	AT1G09630	AT1G64690	AT1G53300									AT3G24715								AT1G78210										AT1G76200	AT5G20350			AT1G60960
	AT2G44980	AT1G09660	ATMG00090	AT1G53310									AT4G14550								AT1G11260										AT3G06540	AT5G13710			AT1G60680
	AT1G72645	AT1G09690	AT4G28270	AT1G53320									AT2G45680								AT4G30210										AT1G55960	AT1G74180			AT3G49110
	AT4G11320	AT1G09710	AT1G02340	AT1G53380									AT3G17860								AT3G10650										AT1G75510	AT5G65205			AT1G70390
	AT5G44350	AT1G09794	AT5G27660	AT1G53400									AT3G62610								AT1G71770										AT3G43340	AT3G10390			AT3G11480
	AT4G27450	AT1G09812	AT2G41415	AT1G53430									AT1G77690								AT1G08660										AT4G28560	AT3G60720			AT3G19930
	AT1G53170	AT1G09840	AT5G50790	AT1G01550									AT1G17380								AT4G30350										AT3G27210	AT2G24020			AT5G43650
	AT4G21800	AT1G09850	ATCG00740	AT1G53440									AT3G15200								AT3G04070										AT1G07980	AT5G01080			AT1G29720
	AT3G26330	AT1G09870	AT1G55120	AT1G53460									AT2G30520								AT1G48325										AT1G15240	AT1G21395			AT5G04720
	AT3G14270	AT1G09920	AT4G03175	AT1G53470									AT5G14780								AT3G07870										AT1G56350	AT4G18720			AT2G43520
	AT5G25890	AT1G09940	AT1G23040	AT1G06520									AT1G22990								AT1G48460										AT3G52350	AT1G08090			AT2G47780
	AT5G53250	AT1G09950	AT3G45160	AT1G53580									AT4G21910								AT1G72740										AT3G53030	AT1G66460			AT2G21655
	AT1G44542	AT1G09960	AT4G33565	AT1G06530									AT2G46310								AT5G50810										AT5G48460	AT2G24200			AT4G21830
	AT1G67100	AT1G09970	AT4G36540	AT1G53645									AT4G22570								AT5G52930										AT5G15350	AT5G19190			AT1G54010
	AT2G30040	AT1G09980	AT2G36270	AT1G53690									AT2G21170								AT3G60570										AT3G60850	AT3G01720			AT4G14650
	AT5G50950	AT1G10010	AT4G30870	AT1G53700									AT2G42540								AT1G47740										AT4G29770	AT4G32880			AT3G60550
	AT5G52640	AT1G10020	AT5G20430	AT1G53720									AT5G03190								AT1G32060										AT5G49250	AT4G22170			AT3G22142
	AT5G40780	AT1G10030	AT1G27370	AT1G53730									AT5G59550								AT1G77700										AT1G56180	AT5G60550			AT5G40210
	AT4G37760	AT1G10040	AT1G66110	AT1G06560									AT1G71692								AT1G17890										AT3G54350	AT3G14410			ATMG00090
	AT1G49940	AT1G10090	AT2G22590	AT1G53760									AT1G21830								AT1G54090										AT2G43360	AT1G06560			AT5G42050
	AT5G52310	AT1G10110	AT3G57150	AT1G53800									AT3G56880								AT3G61900										AT5G58270	AT1G30510			AT3G03640
	AT3G19400	AT1G10120	AT5G39420	AT1G53830									AT1G20990								AT1G01740										AT5G16370	AT4G19040			AT4G34560
	AT5G14380	AT1G10150	AT2G46860	AT1G53840									AT1G54570								AT5G25350										AT2G04115	AT3G21350			AT3G62170
	AT2G03120	AT1G10170	AT2G33810	AT1G54030									AT1G04990								AT2G03830										AT1G65880	AT3G11825			AT1G14480
	AT5G54400	AT1G10180	AT4G13540	AT1G54050									AT1G53580								AT5G56180										AT5G18690	AT3G17690			AT5G40170
	AT1G29510	AT1G10200	AT2G42900	AT1G54060									AT1G15100								AT3G61470										AT2G42650	AT1G17145			AT3G63440
	AT1G67900	AT1G10210	AT5G26340	AT1G54080									AT3G55730								AT1G53090										AT5G63087	AT4G22310			AT2G07747
	AT4G11070	AT1G10220	AT2G27990	AT1G54090									AT5G55920								AT1G12460										AT3G13470	AT1G73910			AT3G06437
	AT3G17998	AT1G10225	AT4G37870	AT1G54110									AT1G70370								AT5G53020										AT3G51820	AT1G70530			AT3G10190
	AT3G18000	AT1G10230	AT5G54200	AT1G54120									AT4G24570								AT1G78130										AT5G06755	AT1G70560			AT3G21670
	AT5G16970	AT1G10240	AT4G34050	AT1G54130									AT2G38820								AT3G20810										AT4G01516	AT1G01715			AT3G23730
	AT1G69490	AT1G10270	AT2G28930	AT1G54200									AT4G13340								AT1G78420										AT3G14330	AT1G29160			AT5G43030
	AT3G10120	AT1G10290	AT1G18730	AT1G54210									AT1G12240								AT1G24267										AT4G24620	AT1G22660			AT1G28310
	AT4G36090	AT1G10360	AT3G21700	AT1G06620									AT1G21920								AT2G40720										AT1G66590	AT3G03060			AT5G24160
	AT3G26520	AT1G10370	AT5G17230	AT1G54230									AT1G32920								AT3G25040										AT1G09550	AT3G58580			AT3G19350
	AT5G54800	AT1G10390	AT4G38960	AT1G54240									AT3G47960								AT3G07440										AT5G19690	AT1G80210			AT3G28810
	AT5G66630	AT1G10410	AT3G09770	AT1G54260									AT2G24570								AT3G49645										AT1G18670	AT2G47410			AT4G38960
	AT5G45550	AT1G10417	AT5G43600	AT1G54410									AT3G47500								AT2G39010										AT3G06740	AT1G74410			AT5G27660
	AT1G02400	AT1G10430	AT1G10522	AT1G54570									AT3G02030								AT2G01140										AT2G32470	AT2G37570			AT3G24068
	AT3G01530	AT1G10500	AT5G02190	AT1G54575									AT2G30070								AT1G21670										AT2G31810	AT1G11330			AT5G37770
	AT2G39250	AT1G10540	AT1G71710	AT1G54610									AT5G28237								AT5G66210										AT4G27650	AT5G09590			AT5G52570
	AT4G18580	AT1G10550	AT5G50720	AT1G54630									AT2G39855								AT1G01260										AT1G32790	AT1G22860			AT5G07800
	AT5G57785	AT1G10560	AT2G07671	AT1G06660									AT5G13220								AT4G34870										AT1G15140	AT3G06030			AT3G05165
	AT4G37790	AT1G10590	AT3G61880	AT1G54690									AT2G39350								AT2G23700										AT2G45350	AT5G46720			AT3G46230
	AT2G38500	AT1G10650	AT4G24630	AT1G54710									AT1G14330								AT2G40910										AT2G23520	AT5G14450			AT3G28080
	AT4G17800	AT1G10657	AT2G18230	AT1G01560									AT3G05030								AT1G80400										AT1G36990	AT5G46270			AT1G28305
	AT3G62550	AT1G10660	AT5G61430	AT1G54730									AT1G77640								AT5G08060										AT2G03750	AT5G05970			AT4G21630
	AT4G28775	AT1G10680	AT4G37730	AT1G54820									AT5G52060								AT1G16730										AT5G54820	AT3G15930			ATMG00180
	AT4G36670	AT1G10710	AT1G07200	AT1G54840									AT3G28040								AT4G34510										AT1G24764	AT1G02920			AT1G27730
	AT2G14750	AT1G10740	AT5G38760	AT1G54990									AT5G45950								AT3G52930										AT3G14470	AT3G16100			AT3G23430
	AT5G40960	AT1G10840	AT3G24080	AT1G06690									AT5G10170								AT5G41990										AT2G28710	AT5G58640			AT5G44790
	AT2G47130	AT1G10865	AT3G52080	AT1G55020									AT1G28100								AT3G30530										AT5G65940	AT4G32760			AT1G68810
	AT2G42380	AT1G10890	AT1G78110	AT1G55080									AT5G61340								AT1G80730										AT3G49601	AT2G34360			AT3G28790
	AT4G38840	AT1G10910	AT1G02070	AT1G55110									AT1G19380								AT3G58680										AT1G53770	AT2G17740			AT5G27870
	AT1G12090	AT1G10940	AT2G07677	AT1G55190									AT5G59820								AT3G52660										AT2G24740	AT5G13510			AT3G50440
	AT1G33960	AT1G10950	AT1G64405	AT1G01570									AT3G61820								AT1G32550										AT2G17350	AT3G61172			AT5G66816
	AT5G43260	AT1G10960	ATCG00070	AT1G55210									AT3G53720								AT2G39460										AT1G69400	AT3G23727			AT1G77520
	AT5G62990	AT1G11090	AT5G14000	AT1G01040									AT4G37750								AT1G04810										AT5G24330	AT1G32440			AT3G53140
	AT3G47650	AT1G11120	AT1G04610	AT1G55250									AT5G57910								AT1G78840										AT5G10860	AT3G53232			AT1G32640
	AT4G29905	AT1G11125	AT3G09780	AT1G55280									AT4G00150								AT5G22630										AT3G46200	AT2G32310			AT5G23960
	AT5G56795	AT1G11130	AT5G45800	AT1G55325									AT1G70380								AT4G14490										AT2G43795	AT1G65920			AT5G40360
	AT2G41260	AT1G11170	AT1G28310	AT1G55335									AT3G21700								AT1G20875										AT4G17300	AT1G16510			AT5G04590
	AT4G36920	AT1G11180	AT3G52430	AT1G55330									AT2G03090								AT2G36480										AT3G24180	AT3G03490			AT2G19650
	AT1G15260	AT1G11210	AT4G08290	AT1G55340									AT1G30080								AT2G37610										ATMG01230	AT3G03970			AT2G12480
	AT3G02310	AT1G11220	AT3G23000	AT1G55350									AT1G02816								AT1G04550										AT5G56670	AT4G39810			AT2G19990
	AT5G67340	AT1G11230	AT1G10650	AT1G55360									AT5G17990								AT4G30000										AT4G17150	AT2G38960			AT5G61660
	AT2G07688	AT1G11250	AT3G50530	AT1G55365									AT3G07010								AT1G15390										AT2G33040	AT1G48770			AT3G01472
	AT5G35111	AT1G11260	AT1G31770	AT1G55475									AT1G21250								AT5G07680										AT5G03710	AT1G78995			AT3G44006
	AT3G26450	AT1G11400	AT5G14440	AT1G55510									AT4G33770								AT4G38780										AT1G63295	AT5G03530			AT1G51760
	AT4G37295	AT1G11430	AT4G12400	AT1G55550									AT1G75300								AT3G04670										AT1G29470	AT3G26395			AT4G31500
	AT5G55450	AT1G11560	ATCG00820	AT1G55610									AT1G18140								AT5G14710										AT1G73000	AT5G64900			AT1G64690
	AT2G16200	AT1G11590	AT3G55690	AT1G55620									AT5G22640								AT5G65400										AT2G39950	AT4G04920			AT5G07410
	AT4G34760	AT1G11591	AT5G17880	AT1G55650									AT1G62770								AT1G08100										AT3G11170	AT3G05330			AT5G59310
		AT1G11610	AT3G61060	AT1G55670									AT1G69260								AT3G15534										AT4G24500	AT2G37750			AT3G46600
		AT1G11660	ATCG01130	AT1G06780									AT1G22410								AT3G04720										AT3G23130	AT1G79880			AT1G06640
		AT1G11670	AT3G47500	AT1G55750									AT5G57120								AT4G37420										AT1G11210	AT1G41830			AT3G12580
		AT1G11680	AT1G05100	AT1G55760									AT2G31380								AT5G53510										AT3G44280	AT5G19420			AT5G43513
		AT1G11690	AT1G17020	AT1G55770									AT5G13290								AT2G40070										AT2G23420	AT5G25195			AT5G41550
		AT1G11700	AT3G23450	AT1G55805									AT2G17230								AT2G32720										AT1G29270	AT3G63095			AT2G43820
		AT1G11710	AT2G19000	AT1G06790									AT5G65310								AT1G32930										AT3G62220	AT1G10140			AT5G38820
		AT1G11730	AT5G15265	AT1G01580									AT1G61100								AT5G04120										AT5G10000	AT5G11710			AT2G43510
		AT1G11750	AT2G19650	AT1G06800									AT1G22640								AT3G63230										AT1G47240	AT2G35190			AT5G10660
		AT1G11840	AT5G48610	AT1G55900									AT3G15510								AT2G40380										AT3G28850	AT2G30150			AT2G41760
		AT1G11860	AT5G62750	AT1G56010									AT3G57150								AT2G46660										AT1G28430	AT2G47830			AT5G54206
		AT1G11890	AT5G52900	AT1G56020									AT2G16730								AT2G39720										AT1G20780	AT5G67550			AT3G29670
		AT1G11910	AT3G22142	AT1G56030									AT5G65040								AT1G68490										AT2G01220	AT3G20160			AT2G38760
		AT1G11940	AT2G32340	AT1G56110									AT2G46270								AT3G63450										AT3G06020	AT3G02820			AT3G20865
		AT1G11950	AT1G21590	AT1G56145									AT1G30400								AT1G18970										AT2G28140	AT5G05450			AT2G28305
		AT1G11960	AT3G28770	AT1G06840									AT5G41400								AT1G03040										AT4G16070	AT4G36660			AT2G25450
		AT1G11970	AT2G47750	AT1G56190									AT1G64405								AT2G46820										AT4G14430	AT5G12910			AT4G01430
		AT1G12000	AT2G24570	AT1G56225									AT5G11790								AT1G28250										AT4G37560	AT2G45040			AT2G07749
		AT1G12010	AT5G55660	AT1G56233									AT4G34770								AT3G01460										AT1G60870	AT1G16880			AT2G05940
		AT1G12020	ATMG01080	AT1G56240									AT1G54030								AT3G51950										AT4G31780	AT1G15130			AT5G50012
		AT1G12070	AT3G23430	AT1G56250									AT3G22540								AT5G56850										AT2G39090	AT5G67260			AT1G72120
		AT1G12080	AT1G70985	AT1G56260									AT2G23680								AT3G60220										AT3G10110	AT3G14760			AT3G07280
		AT1G12100	AT5G38980	AT1G06850									AT1G52760								AT3G07160										AT5G06790	AT2G18010			AT3G02040
		AT1G12110	AT5G61340	AT1G56300									AT4G38950								AT5G47900										AT1G02290	AT4G08620			AT4G09850
		AT1G12120	AT5G62070	AT1G06890									AT5G37740								AT4G31890										AT1G20460	AT4G26483			AT3G28270
		AT1G12140	AT4G38650	AT1G56500									AT5G10720								AT1G08190										AT1G26740	AT5G47435			AT3G10410
		AT1G12210	AT1G06920	AT1G56580									AT3G09780								AT1G13370										AT3G09055	AT3G22980			AT2G39050
		AT1G12230	AT3G23790	AT1G56660									AT4G30950								AT2G30105										AT5G66390	AT1G25280			AT2G18162
		AT1G12240	AT1G03230	AT1G06920									AT4G39260								AT1G32400										AT3G51390	AT4G22820			AT2G37770
		AT1G12270	AT3G14380	AT1G06925									AT2G28930								AT3G03560										AT4G35150	AT4G10280			AT2G02720
		AT1G12290	AT2G07692	AT1G57680									AT1G08650								AT1G24260										AT1G35516	AT4G33660			AT2G39030
		AT1G12310	AT1G53490	AT1G57765									AT4G18830								AT5G42895										AT1G22210	AT1G23210			AT3G48580
		AT1G12340	AT2G39518	AT1G06980									AT2G45300								AT5G63350										AT4G33030	AT3G27030			AT5G46115
		AT1G12380	AT2G07779	AT1G57990									AT4G33920								AT2G35620										AT2G46220	AT1G71696			AT2G16750
		AT1G12390	AT3G46300	AT1G06990									AT1G21440								AT5G62670										AT4G28750	AT1G03120			AT1G43160
		AT1G12411	AT3G24715	AT1G58080									AT5G54380								AT3G50620										AT4G01671	AT5G48730			AT1G47450
		AT1G12430	AT5G19060	AT1G58180									AT4G29700								AT1G07040										AT1G13870	AT1G28330			AT4G13210
		AT1G12450	AT4G26630	AT1G58210									AT1G21000								AT3G60110										AT3G17320	AT3G04240			AT1G73040
		AT1G12460	AT5G63550	AT1G07040									AT5G62020								AT1G11230										AT3G05870	AT4G30980			AT3G51450
		AT1G12500	AT2G41630	AT1G01590									AT2G46510								AT2G43330										AT5G40610	AT3G21890			AT1G58170
		AT1G12520	AT4G34770	AT1G07050									AT4G32800								AT5G57330										AT4G27000	AT1G01440			AT4G09644
		AT1G12530	AT3G14040	AT1G58350									AT1G23030								AT3G61380										AT4G20290	AT5G11880			AT2G22650
		AT1G12540	AT2G24160	AT1G58360									AT3G27810								AT3G58940										AT1G20630	AT1G66200			AT1G68600
		AT1G12560	AT3G10450	AT1G58420									AT3G61590								AT3G02170										AT5G06270	AT5G44100			AT1G49310
		AT1G12570	AT4G02075	AT1G58430									AT1G72830								AT5G01850										AT2G28850	AT1G65900			AT4G15765
		AT1G12580	AT4G23690	AT1G58525									AT1G29230								AT2G37650										AT1G15820	AT3G19740			AT1G66860
		AT1G12610	AT5G27870	AT1G07090									AT1G19840								AT1G79340										ATCG00630	AT1G18890			AT1G65060
		AT1G12680	AT5G54560	AT1G07110									AT5G37260								AT3G05500										AT1G14680	AT3G05420			AT4G05590
		AT1G12760	AT2G38400	AT1G01600									AT2G18160								AT3G62499										AT5G20930	AT3G13580			AT1G61290
		AT1G12770	AT1G67290	AT1G59620									AT1G73500								AT5G01730										AT3G22810	AT5G16880			AT2G17280
		AT1G12790	AT1G49160	AT1G07135									AT1G04610								AT3G10915										AT4G01970	AT1G55080			AT1G75910
		AT1G12800	AT1G12000	AT1G59640									AT1G23040								AT1G73590										AT1G26090	AT1G12640			AT5G27350
		AT1G12810	AT4G32180	AT1G59650									AT1G24070								AT3G62980										AT4G28280	AT5G63670			AT1G28620
		AT1G12820	AT1G74020	AT1G07150									AT3G55970								AT1G68710										AT5G65750	AT1G70949			AT5G60300
		AT1G12840	AT2G20880	AT1G59750									AT3G27820								AT1G79270										AT5G07920	AT1G16020			AT5G26670
		AT1G12830	AT1G74055	AT1G07160									AT3G57530								AT1G67310										AT3G06270	AT3G12710			AT1G44790
		AT1G12900	AT5G35200	AT1G59820									AT4G28085								AT5G21990										AT4G31615	AT1G64790			AT2G24160
		AT1G12930	AT3G25717	AT1G59910									AT4G35000								AT4G35660										AT3G57260	AT5G24410			AT5G63590
		AT1G12950	AT5G08450	AT1G59940									AT3G62820								AT1G64380										AT1G60430	AT5G65910			AT5G19110
		AT1G12960	AT2G41760	AT1G07190									AT3G54810								AT1G27920										AT5G07730	AT2G40570			AT4G08250
		AT1G12980	AT1G72440	AT1G60000									AT4G03400								AT4G38100										AT4G05050	AT2G37520			AT3G30387
		AT1G12990	AT4G18700	AT1G60010									AT2G17730								AT3G01750										AT3G04903	AT5G50200			AT3G24360
		AT1G13020	AT1G67330	AT1G07200									AT1G28290								AT1G32360										AT4G08530	AT5G13370			AT1G54890
		AT1G13090	AT5G01610	AT1G07210									AT2G46770								AT1G71010										AT5G23380	AT3G47341			AT4G03060
		AT1G13140	AT1G05135	AT1G60070									AT2G46260								AT2G01905										AT1G02410	AT1G17330			AT3G09870
		AT1G13170	AT1G56110	AT1G60090									AT2G43470								AT3G29360										AT4G32540	AT2G05294			AT5G13740
		AT1G13195	AT1G19840	AT1G60130									AT2G40140								AT4G17570										AT1G05190	AT3G21330			AT3G59220
		AT1G13220	AT4G03480	AT1G60140									AT2G29090								AT1G72690										AT1G12010	AT5G55230			AT2G22590
		AT1G13230	AT1G09390	AT1G07230									AT5G53420								AT1G75160										AT5G03740	AT2G29065			AT5G41750
		AT1G13245	AT5G13640	AT1G60190									AT2G17500								AT5G15220										AT5G50920	AT5G06265			AT3G03480
		AT1G13250	AT3G17170	AT1G60230									AT1G19180								AT4G31130										AT3G52790	AT1G76010			AT1G45201
		AT1G13260	AT5G53810	AT1G07240									AT5G56980								AT4G39140										AT1G17460	AT2G42120			AT3G33004
		AT1G13270	AT1G20920	AT1G07260									AT1G70690								AT5G46790										AT5G38520	AT1G47550			AT3G19370
		AT1G13280	AT2G16018	AT1G60440									AT5G59500								AT5G19040										AT3G55530	AT3G51140			AT5G61600
		AT1G13330	AT4G08250	AT1G60530									AT5G49360								AT4G32920										AT5G12980	AT1G09150			AT2G28120
		AT1G13350	AT4G11080	AT1G60570									AT4G10390								AT4G00170										AT1G15440	AT1G14230			AT1G09500
		AT1G13360	AT2G23680	AT1G60590									AT5G62165								AT4G30760										AT5G03430	AT5G27770			AT1G13430
		AT1G13370	AT3G46230	AT1G60610									AT5G63180								AT5G13520										AT5G65440	AT1G21010			AT4G15350
		AT1G13380	AT2G04190	AT1G07270									AT1G54200								AT5G59720										AT5G14970	AT3G13960			AT5G47600
		AT1G13390	AT4G00350	AT1G60670									AT2G17240								AT4G14750										AT1G19890	AT5G61130			AT5G51190
		AT1G13440	AT1G56660	AT1G60710									AT1G52890								AT4G24231										AT3G09630	AT2G37300			AT5G34882
		AT1G13470	AT5G04860	AT1G07280									AT5G27000								AT3G18957										AT1G17400	AT2G22990			AT1G14250
		AT1G13600	AT2G32885	AT1G60800									AT1G02470								AT3G24050										AT4G38760	ATCG00480			AT5G54490
		AT1G13635	AT4G27450	AT1G60810									AT2G36950								AT3G28920										AT4G36700	AT3G09820			ATMG01180
		AT1G13690	AT1G76810	AT1G60850									AT1G74930								AT3G14930										AT5G03650	AT5G40770			AT2G25670
		AT1G13700	AT2G21890	AT1G60860									AT2G41900								AT5G11590										AT1G66250	AT1G64760			AT4G13395
		AT1G13730	ATMG00590	AT1G60890									AT3G44310								AT4G17880										AT5G67120	AT4G02370			AT1G45211
		AT1G13830	AT2G07718	AT1G60900									AT1G74970								AT5G01780										AT4G31180	AT3G60040			AT1G26610
		AT1G13860	AT5G58750	AT1G60950									AT4G15960								AT2G43500										AT1G52570	AT4G31720			AT5G62470
		AT1G13870	ATMG00830	AT1G61100									AT1G61890								AT5G66300										AT1G73030	AT1G35255			AT2G15620
		AT1G13950	AT1G34040	AT1G61110									AT1G23090								AT1G50830										AT1G04920	AT1G64600			AT2G07712
		AT1G13960	AT1G23080	AT1G01620									AT1G13280								AT5G24470										AT3G54130	AT5G48950			AT3G28290
		AT1G13980	AT2G07711	AT1G61140									AT4G35060								AT2G35890										AT1G30190	AT4G18425			AT3G47350
		AT1G14000	AT1G23540	AT1G61170									AT4G02075								AT1G13950										AT5G45469	AT5G17060			AT3G13390
		AT1G14010	AT5G27120	AT1G61210									AT3G23790								AT4G24010										AT4G31210	AT2G27020			AT4G11760
		AT1G14040	AT5G25280	AT1G61215									AT3G05858								AT2G36970										AT5G55520	AT2G42870			AT5G40010
		AT1G14150	AT1G49320	AT1G61230									AT1G23870								AT1G30090										AT1G55050	AT3G63140			AT4G06534
		AT1G14160	AT4G09850	AT1G61255									AT5G04885								AT5G07280										AT3G26410	AT4G03080			AT1G72240
		AT1G14280	AT2G41900	AT1G61280									AT4G23690								AT2G37630										AT1G62450	AT1G14685			AT2G41050
		AT1G14300	AT2G47810	AT1G61330									AT5G57660								AT2G28315										AT3G09810	AT1G73310			AT3G22968
		AT1G14315	AT1G49600	AT1G61350																	AT2G41870										AT5G54080	AT1G66070			AT2G07783
		AT1G14330	AT3G14830	AT1G61470																	AT1G07940										AT2G35612	AT5G42830			AT5G10100
		AT1G14340	AT3G28780	AT1G07380																	AT1G15660										AT1G03830	AT1G33470			AT3G19553
		AT1G14360	AT3G05760	AT1G07390																	AT2G30060										AT3G53870	AT2G19450			AT4G01480
		AT1G14380	AT4G25340	AT1G61540																	AT4G25870										AT3G12850	AT1G78890			AT4G32510
		AT1G14410	AT2G07776	AT1G61667																	AT2G45590										AT4G37670	AT1G03310			AT4G04570
		AT1G14450	AT5G43700	AT1G07410																	AT1G15980										AT3G60460	AT1G59940			AT3G05060
		AT1G14490	AT5G38130	AT1G61680																	AT1G26110										AT1G36980	AT3G59360			AT5G18290
		AT1G14510	ATMG01090	AT1G61730																	AT3G23300										AT3G60360	AT1G79170			AT1G76020
		AT1G14570	AT1G76720	AT1G61740																	AT3G50830										AT4G37510	AT3G19390			AT2G36690
		AT1G14590	AT2G01200	AT1G07420																	AT2G42030										AT1G09620	ATCG00680			AT1G66110
		AT1G14620	AT1G01690	AT1G07430																	AT5G43920										AT4G01050	AT1G68185			AT2G39330
		AT1G14630	AT5G27920	AT1G61800																	AT5G07030										AT1G06190	AT5G17690			AT1G75050
		AT1G14650	AT3G22540	AT1G07440																	AT3G55640										AT1G26790	AT3G15355			AT3G19010
		AT1G14670	AT2G40400	AT1G61860																	AT3G18060										AT4G01000	AT5G37500			AT1G04660
		AT1G14680	AT5G53930	AT1G61890																	AT5G19020										AT2G44730	AT1G15550			AT4G01440
		AT1G14687	AT4G26190	AT1G01630																	AT1G11860										AT3G29020	AT4G22745			AT4G09500
		AT1G14688	AT2G18260	AT1G61900																	AT4G02390										AT1G13600	AT2G13840			ATCG00740
		AT1G14690	AT1G77690	AT1G61920																	AT2G34710										AT1G67480	AT1G05385			AT5G07660
		AT1G14710	AT2G42610	AT1G61930																	AT1G20010										AT5G58870	AT5G63410			AT2G42660
		AT1G14720	AT4G15030	AT1G61940																	AT5G43810										AT3G07290	AT5G55930			AT1G17020
		AT1G14730	AT4G30140	AT1G07470																	AT5G46180										AT1G03680	AT3G63500			AT5G57420
		AT1G14740	AT3G14840	AT1G62030																	AT1G18470										AT3G04190	AT1G61860			AT1G33800
		AT1G14750	AT3G02040	AT1G62040																	AT5G20680										AT1G20960	AT2G24830			AT4G13410
		AT1G14790	AT5G03150	AT1G62050																	AT3G47910										AT1G12960	AT4G01010			AT5G54560
		AT1G14800	AT2G46450	AT1G62180																	AT1G73875										AT1G13220	AT5G58500			AT2G05260
		AT1G14840	AT2G36120	AT1G62200																	AT3G08670										AT5G65500	AT4G25550			AT1G19790
		AT1G14860	AT4G15350	AT1G07480																	AT5G47620										AT5G43850	AT3G10116			AT5G34885
		AT1G14870	AT3G07850	AT1G62260																	AT2G23090										AT5G16140	AT1G74900			AT3G24080
		AT1G14890	AT5G08750	AT1G01640																	AT2G46520										AT5G48760	AT4G20780			AT4G27860
		AT1G14910	AT2G22660	AT1G62300																	AT5G65460										AT5G61790	AT4G37090			AT2G38740
		AT1G14920	AT5G02750	AT1G62305																	AT2G19180										AT5G41770	AT4G36400			AT2G07779
		AT1G14980	AT3G52490	AT1G62310																	AT4G01100										AT4G25660	AT1G48620			AT1G70130
		AT1G14990	AT1G07220	AT1G62350																	AT1G07610										AT4G01520	AT4G30097			AT5G24760
		AT1G15010	AT5G56320	AT1G62370																	AT3G62320										AT4G01730	AT1G02910			AT5G26730
		AT1G15020	AT5G54206	AT1G62515																	AT1G10210										AT4G37830	AT1G77140			AT1G30710
		AT1G15030	AT4G17900	AT1G62570																	AT2G34340										AT3G63420	AT1G67500			AT3G24100
		AT1G15060	AT5G19730	AT1G07550																	AT5G65158										AT3G58930	AT2G33670			AT3G28830
		AT1G15100	AT1G29440	AT1G62770																	AT3G51895										AT5G35210	AT5G67130			AT2G29750
		AT1G15110	AT4G14368	AT1G62790																	AT2G42290										AT5G55000	AT2G05760			AT2G03972
		AT1G15120	ATMG00140	AT1G01650																	AT4G27010										AT5G05250	AT2G15900			AT3G12520
		AT1G15140	AT4G36520	AT1G62810																	AT5G58990										AT5G58420	AT5G37360			AT5G22570
		AT1G15165	AT4G17260	AT1G62870																	AT2G14765										AT1G58235	AT3G60200			AT2G02610
		AT1G15200	AT5G07410	AT1G62981																	AT1G71520										AT5G47440	AT1G79570			AT4G02360
		AT1G15220	AT1G48100	AT1G07570																	AT3G07220										AT5G60600	AT1G01370			AT3G05460
		AT1G15240	AT2G36830	AT1G63010																	AT5G49130										AT5G55840	AT5G61820			AT5G52760
		AT1G15270	AT3G63300	AT1G07590																	ATCG00270										AT3G49780	AT3G51550			AT2G31570
		AT1G15320	AT1G18200	AT1G63020																	AT1G18390										AT2G20310	AT2G17830			AT4G37730
		AT1G15350	AT5G55820	AT1G63090																	AT5G56900										AT3G20050	AT4G15180			AT5G55170
		AT1G15370	AT1G75580	AT1G07610																	AT1G25480										AT5G64180	AT1G05136			AT3G60955
		AT1G15380	AT1G52190	AT1G63120																	AT4G15560										AT2G42410	AT4G32620			AT1G28480
		AT1G15390	AT3G05690	AT1G63130																	AT3G14860										AT5G43950	AT4G19185			AT3G45130
		AT1G15400	AT3G05060	AT1G63140																	AT1G52730										AT4G38330	AT1G63650			AT3G26300
		AT1G15410	AT3G11450	AT1G63470																	AT2G18960										AT5G62390	AT1G18160			AT3G44250
		AT1G15420	AT3G62170	AT1G63500																	AT2G36960										AT1G62490	AT5G17300			AT5G01500
		AT1G15430	AT1G23870	AT1G63640																	AT5G66460										AT1G76770	AT4G17540			AT4G21650
		AT1G15440	AT4G17940	AT1G63650																	AT5G20790										AT5G35732	AT4G38690			AT4G08290
		AT1G15460	AT3G14560	AT1G63680																	AT5G53460										AT1G07070	AT2G42710			AT3G02670
		AT1G15500	AT3G01630	AT1G63690																	AT5G39040										AT4G27420	AT5G10320			AT5G53830
		AT1G15530	AT5G44620	AT1G63700																	AT5G10460										AT1G75800	AT5G41610			AT3G56200
		AT1G15570	AT2G02720	AT1G63720																	AT3G13120										AT1G58070	AT1G18990			AT1G73607
		AT1G15660	AT3G44006	AT1G63820																	AT3G47250										AT5G06510	AT1G11780			AT4G08869
		AT1G15670	AT2G07777	AT1G07645																	AT3G04870										AT2G20400	AT1G55325			ATMG01370
		AT1G15680	AT3G28080	AT1G63830																	AT1G77060										AT4G29910	AT2G28440			AT5G23970
		AT1G15690	AT5G41020	AT1G63840																	AT3G53430										AT2G47550	AT5G54980			AT4G32630
		AT1G15700	AT2G34670	AT1G63850																	AT5G01720										AT2G46375	AT2G01400			AT5G58050
		AT1G15710	AT2G01990	AT1G63855																	AT3G48750										AT3G22190	AT2G26260			AT1G07330
		AT1G15740	AT5G65480	AT1G64040																	AT3G11420										AT4G19010	AT1G73750			AT5G39320
		AT1G15750	AT4G04570	AT1G64050																	AT3G13030										AT5G22210	AT3G07100			AT4G16630
		AT1G15757	AT1G71720	AT1G64060																	AT4G40060										AT1G67360	AT1G60570			AT3G45680
		AT1G15760	AT2G31110	AT1G64065																	AT2G47610										AT1G53282	AT4G32105			AT5G20430
		AT1G15800	AT4G24810	AT1G64070																	AT5G20885										AT2G36560	AT3G56740			AT2G07692
		AT1G15810	AT3G26235	AT1G64090																	AT5G41050										AT5G12850	AT1G12620			AT1G05135
		AT1G15820	AT2G22650	AT1G64105																	AT1G01660										AT1G47220	AT5G45990			AT5G59305
		AT1G15860	AT4G30190	AT1G64110																	AT3G60810										AT5G64590	AT2G37320			AT1G30135
		AT1G15910	AT2G39660	AT1G64140																	AT1G05350										AT5G43660	AT2G41090			AT3G16120
		AT1G15930	AT3G09590	AT1G64150																	AT5G66770										AT3G51980	AT2G45050			AT1G43910
		AT1G15960	AT4G34970	AT1G64170																	AT4G24370										AT1G61560	AT5G65010			AT5G53590
		AT1G15980	AT1G07330	AT1G64180																	AT1G19930										AT1G09870	AT1G29420			AT3G30122
		AT1G16000	AT1G10530	AT1G64190																	AT5G56985										AT5G17980	AT1G62030			AT1G78660
		AT1G16030	AT3G25810	AT1G64230																	AT5G01820										AT1G17710	AT2G39260			AT3G28340
		AT1G16150	AT5G15140	AT1G64260																	AT5G56520										AT4G31350	AT1G72340			AT3G52080
		AT1G16170	AT3G45780	AT1G64300																	AT3G21320										AT4G30510	AT4G27840			AT1G66360
		AT1G16180	AT3G15200	AT1G64330																	AT4G38380										AT1G10540	AT5G20000			AT1G74055
		AT1G16210	AT3G53920	AT1G01010																	AT2G31820										AT3G50940	AT1G72800			AT3G04210
		AT1G16240	AT1G50990	AT1G64370																	AT5G63940										AT2G03010	AT3G18030			AT3G03828
		AT1G16270	AT1G33055	AT1G64380																	AT1G10220										AT2G02880	AT1G06490			AT5G54145
		AT1G16290	ATMG00030	AT1G07720																	AT1G11430										AT3G60160	AT1G19970			AT1G50630
		AT1G16340	AT3G11080	AT1G64385																	AT3G17590										AT1G49240	AT5G02220			AT2G07718
		AT1G16350	AT2G46310	AT1G64390																	AT1G70060										AT5G47420	AT1G22610			AT5G18407
		AT1G16430	AT2G39350	AT1G64405																	AT4G30620										AT3G19630	AT5G03770			AT4G28000
		AT1G16490	AT4G31910	AT1G01660																	AT5G13050										AT4G23493	AT3G55340			AT1G49715
		AT1G16500	AT2G30070	AT1G64460																	AT5G39660										AT1G25025	AT3G53510			AT2G02640
		AT1G16520	AT2G37640	AT1G07725																	AT1G49225										AT5G53350	AT2G40690			AT5G17880
		AT1G16630	AT5G49640	AT1G64570																	AT5G02290										AT4G32820	AT2G28240			AT1G28370
		AT1G16640	AT1G69940	AT1G64600																	AT1G79410										AT3G06610	AT4G27595			AT2G24600
		AT1G16680	AT4G01720	AT1G64620																	AT2G47160										AT3G52940	AT1G27000			AT2G33380
		AT1G16700	AT3G62640	AT1G64650																	AT4G27740										AT1G11400	AT1G75870			AT5G27120
		AT1G16710	ATCG00440	AT1G64660																	AT2G46240										AT3G04110	AT5G57700			AT3G08630
		AT1G16730	AT3G02400	AT1G64670																	AT1G24625										AT3G53500	AT5G16150			AT5G38760
		AT1G16750	AT1G62500	AT1G64720																	AT2G45190										AT5G26990	AT4G26300			AT1G24735
		AT1G16770	AT1G06100	AT1G64740																	AT5G57490										AT5G45360	AT1G07910			AT2G11910
		AT1G16790	AT4G04900	AT1G64760																	AT3G27590										AT4G26750	AT3G24170			AT5G28030
		AT1G16800	AT1G05240	AT1G64780																	AT1G02620										AT1G56120	AT3G01160			AT5G23170
		AT1G16825	AT1G20450	AT1G64790																	AT1G75950										AT4G38540	AT1G06010			AT4G30870
		AT1G16860	AT1G08570	AT1G07770																	AT1G68060										AT3G53760	AT3G53294			AT3G22850
		AT1G16870	AT3G62150	AT1G64850																	AT1G77600										AT3G26510	AT1G64260			AT2G32030
		AT1G16900	AT2G25670	AT1G64900																	AT1G68790										AT3G49910	AT5G42170			AT1G34040
		AT1G16910	AT3G28040	AT1G64970																	AT3G14590										AT5G02840	AT5G24850			AT4G32170
		AT1G16916	AT4G20140	AT1G65010																	AT5G54290										AT1G69640	AT1G01360			AT2G45930
		AT1G16920	AT4G16630	AT1G07810																	AT1G30230										AT1G04440	AT5G55730			AT2G16018
		AT1G17060	AT2G36690	AT1G65270																	AT1G53200										AT2G32415	AT5G41350			AT4G09464
		AT1G17090	AT3G51400	AT1G65295																	AT3G48760										AT1G02120	AT1G52690			AT4G29690
		AT1G17100	AT5G65900	AT1G65450																	AT4G24280										AT3G11460	AT1G15720			AT1G48300
		AT1G17110	AT5G11950	AT1G07870																	AT5G65580										AT1G07620	AT1G70470			AT2G46400
		AT1G17120	AT2G16730	AT1G65470																	AT5G11270										AT5G18600	AT1G11820			AT2G05440
		AT1G17180	AT1G64720	AT1G07885																	AT4G01250										AT3G62000	AT1G80700			AT5G23820
		AT1G17235	AT1G28130	AT1G65590																	AT4G35580										AT2G36710	AT5G51030			AT2G43535
		AT1G17280	AT2G32160	AT1G07901																	AT5G01210										AT4G29840	AT1G78510			AT4G04900
		AT1G17290	AT2G07723	AT1G65730																	AT5G18110										AT4G01850	AT4G02290			AT1G54020
		AT1G17350	AT1G76550	AT1G07910																	AT5G26760										AT1G74920	AT5G64200			AT3G63050
		AT1G17370	AT1G08230	AT1G65820																	AT2G42880										AT1G11750	AT5G47640			AT1G52410
		AT1G17380	ATMG00530	AT1G65840																	AT1G61350										AT5G43211	AT5G42200			AT5G65410
		AT1G17400	AT2G07663	AT1G65900																	AT4G36930										AT2G40080	AT2G34240			AT4G02330
		AT1G17420	AT5G65207	AT1G65920																	AT1G42440										AT1G56423	AT5G41640			AT2G31790
		AT1G17440	ATCG00430	AT1G65930																	AT3G63290										AT5G05090	AT1G20140			AT5G23810
		AT1G17455	AT4G09640	AT1G65950																	AT2G26520										AT5G04330	AT5G27210			AT3G46130
		AT1G17460	AT3G26830	AT1G65980																	AT1G49480										AT2G19350	AT3G19850			AT3G25180
		AT1G17480	AT3G13390	AT1G07920																	AT3G50660										AT5G24400	AT3G13690			AT2G07709
		AT1G17500	AT1G76820	AT1G07930																	AT2G33150										AT3G14430	AT4G33790			AT1G30760
		AT1G17530	AT4G19460	AT1G01680																	AT1G27200										AT1G50010	AT1G80330			AT2G47600
		AT1G17545	AT5G13290	AT1G66070																	AT5G10010										AT2G01440	AT1G67940			AT1G48598
		AT1G17580	AT1G32520	AT1G66120																	AT3G53611										AT5G64290	AT4G27350			AT1G72416
		AT1G17615	AT1G54890	AT1G07940																	AT5G67450										AT1G78895	AT1G70100			AT2G44460
		AT1G17620	AT1G70940	AT1G66145																	AT1G11250										AT1G15460	AT2G03470			AT4G14020
		AT1G17710	AT3G09600	AT1G66150																	AT3G60310										AT3G49680	AT5G59570			AT5G54550
		AT1G17720	AT3G26300	AT1G66200																	AT4G36390										AT4G30970	AT3G58860			AT1G55570
		AT1G17730	AT3G13910	AT1G66220																	AT5G58590										AT2G20720	AT5G61310			AT3G30580
		AT1G17830	AT5G22640	AT1G66235																	AT5G57110										AT1G54850	AT1G47340			AT1G72440
		AT1G17840	AT1G65440	AT1G66350																	AT2G18850										AT1G10660	AT5G14410			AT1G60260
		AT1G17890	AT5G44020	AT1G66400																	AT1G07380										AT2G35615	AT5G04310			AT5G43525
		AT1G17940	AT3G48500	AT1G66410																	AT5G43060										AT5G53540	AT4G37490			AT2G21730
		AT1G17950	AT2G40650	AT1G66460																	AT1G76180										AT3G51850	AT3G26950			AT1G31770
		AT1G17970	AT3G06830	AT1G66480																	AT3G09270										AT1G73240	AT4G39770			AT2G14378
		AT1G18020	AT5G41790	AT1G66540																	AT4G37610										AT5G06080	AT1G30810			AT3G14660
		AT1G18070	AT3G02030	AT1G66600																	AT3G04910										AT5G21070	AT1G06390			AT3G06070
		AT1G18080	AT1G05250	AT1G08005																	AT4G40020										AT4G13490	AT5G20650			AT3G50270
		AT1G18140	AT1G67560	AT1G66680																	AT2G42600										AT5G42223	AT5G55530			AT3G24225
		AT1G18150	AT2G07180	AT1G01690																	AT1G08710										AT2G45380	AT2G42910			AT4G17470
		AT1G18200	AT2G19850	AT1G08010																	AT1G01040										AT1G24280	AT4G18140			AT4G15200
		AT1G18210	AT4G25990	AT1G66730																	AT1G28440										AT5G58730	AT1G77780			AT5G24290
		AT1G18280	AT2G33510	AT1G08030																	AT1G01650										AT1G09690	AT4G38900			AT4G27720
		AT1G18300	AT5G58787	AT1G66740																	AT5G65613										AT5G65880	AT5G60880			AT2G44840
		AT1G18310	AT5G61770	AT1G66750																	AT3G50860										AT5G15080	AT2G38730			AT4G15920
		AT1G18330	AT5G16000	AT1G66770																	AT1G74720										AT1G73760	AT4G39930			AT2G47750
		AT1G18340	AT1G14290	AT1G66830																	AT1G53230										AT1G37150	AT5G27950			AT4G24640
		AT1G18370	AT3G16520	AT1G08040																	AT5G06730										AT4G14600	AT5G63510			AT3G25770
		AT1G18390	AT4G14650	AT1G67040																	AT1G01970										AT3G09470	AT5G54810			AT2G17040
		AT1G18400	AT3G14780	AT1G67050																	AT5G13700										AT3G49070	ATMG00670			AT3G48350
		AT1G18420	AT3G54730	AT1G67060																	AT4G37770										AT3G62420	AT4G27760			AT2G22240
		AT1G18460	ATMG00820	AT1G67090																	AT4G35110										AT2G01008	AT5G20030			AT2G18270
		AT1G18470	AT5G55010	AT1G67120																	AT3G57800										AT5G23730	AT1G12440			AT3G16340
		AT1G18480	AT5G04190	AT1G67160																	AT5G59790										AT3G52300	AT3G45910			AT1G17300
		AT1G18510	AT1G53480	AT1G67230																	AT1G75560										AT4G11521	AT4G25315			AT4G19460
		AT1G18540	AT2G31150	AT1G67250																	AT1G56225										AT5G64760	AT4G16745			AT1G62660
		AT1G18550	AT3G63440	AT1G67310																	AT3G52190										AT4G00752	AT1G67790			AT5G26320
		AT1G18560	AT3G14660	AT1G08080																	AT4G37300										AT1G52620	AT3G01210			AT5G43516
		AT1G18600	AT4G35180	AT1G08090																	AT1G27290										AT3G61310	AT2G25300			AT5G64190
		AT1G18670	AT4G32610	AT1G67330																	AT3G25860										AT2G36500	AT1G70640			AT5G54940
		AT1G18700	AT4G13790	AT1G67350																	AT4G37590										AT5G55100	AT1G78970			AT3G26960
		AT1G18710	AT5G48140	AT1G67410																	AT2G47580										AT5G03230	AT3G53280			AT1G02850
		AT1G18730	AT5G55980	AT1G67500																	AT1G30560										AT4G15080	AT4G27070			AT4G13790
		AT1G18740	AT2G29620	AT1G08100																	AT4G17440										AT1G17730	AT2G22830			AT1G17030
		AT1G18750	AT2G31160	AT1G67550																	AT5G64550										AT2G20463	AT1G22200			AT2G41480
		AT1G18800	AT3G01540	AT1G67560																	AT3G58650										AT2G01021	AT1G64300			AT4G10290
		AT1G18830	AT5G15840	AT1G67590																	AT4G31610										AT4G36830	AT1G53840			AT5G28650
		AT1G18840	AT4G25750	AT1G67630																	AT5G13440										AT5G66450	AT2G43490			AT1G29670
		AT1G18860	AT1G15100	AT1G08110																	AT1G78240										AT2G45810	AT3G53340			AT2G17930
		AT1G18900	AT2G33435	AT1G67720																	AT3G19860										AT4G28720	AT4G02990			AT4G19430
		AT1G18970	AT1G21722	AT1G67740																	AT3G16380										AT5G40595	AT2G35460			AT1G54000
		AT1G18980	AT3G52900	AT1G67750																	AT3G27060										AT1G73060	AT1G67350			AT1G48570
		AT1G19000	AT2G36810	AT1G67790																	AT2G41100										AT2G47330	AT5G47890			AT1G72900
		AT1G19050	AT3G52620	AT1G01695																	AT2G32380										AT4G09970	AT1G67250			AT1G80160
		AT1G19080	AT5G60200	AT1G67840																	AT1G60950										AT5G53650	AT3G48570			AT4G15490
		AT1G19110	AT1G28620	AT1G67880																	AT2G31750										AT1G66890	AT1G15920			AT4G30450
		AT1G19150	AT1G14890	AT1G67900																	AT5G38740										AT5G52340	AT2G23000			AT3G52180
		AT1G19180	AT5G04885	AT1G67940																	AT4G14620										AT5G61010	AT2G40840			AT2G17080
		AT1G19210	AT4G17520	AT1G08135																	AT5G66950										AT3G49800	AT5G59830			AT3G24900
		AT1G19220	AT4G04030	AT1G67950																	AT4G38170										AT3G29970	AT2G28000			AT4G36410
		AT1G19230	AT4G24640	AT1G68030																	AT5G54310										AT4G22980	AT4G39110			AT5G25390
		AT1G19310	AT2G41820	AT1G68040																	AT4G34620										AT1G10590	AT4G15790			AT3G12750
		AT1G19340	AT4G14990	AT1G68050																	AT5G62480										AT3G58020	AT2G16950			AT1G60740
		AT1G19350	AT5G56220	AT1G68060																	AT1G55365										AT1G10200	AT4G34860			AT1G10070
		AT1G19370	AT1G51355	AT1G68130																	AT1G49420										AT3G61790	AT2G15820			AT5G59920
		AT1G19380	AT3G19000	AT1G68140																	AT3G56080										AT2G07732	AT2G19940			AT3G44860
		AT1G19430	AT1G77670	AT1G68160																	AT1G15670										AT2G33240	AT5G20670			AT2G07776
		AT1G19460	AT5G54680	AT1G68185																	AT4G03110										AT1G04635	AT4G24204			AT4G09750
		AT1G19480	AT5G56530	AT1G68290																	AT1G54110										AT3G08810	AT1G20410			AT4G01770
		AT1G19485	AT2G38530	AT1G08165																	AT1G29060										AT4G29590	AT2G16700			AT5G36160
		AT1G19500	AT5G27980	AT1G68330																	AT4G00700										AT5G46570	AT2G21500			AT3G46890
		AT1G19540	AT2G37010	AT1G68340																	AT1G18080										AT5G38890	AT5G61920			ATMG00140
		AT1G19580	AT3G24900	AT1G68350																	AT2G20050										AT1G19880	AT3G26910			AT3G52600
		AT1G19600	AT1G20470	AT1G08180																	AT5G08190										AT5G19440	AT2G32070			AT1G16400
		AT1G19650	AT3G50310	AT1G68400																	AT4G00660										AT2G32690	AT1G02420			AT3G22290
		AT1G19670	AT3G06437	AT1G68410																	AT3G10060										AT3G52330	AT1G32460			AT1G24470
		AT1G19710	AT3G05200	AT1G68440																	AT1G26270										AT1G71730	AT1G11390			AT1G56385
		AT1G19770	AT5G58050	AT1G68450																	AT1G64650										AT4G04025	AT5G08460			AT5G51870
		AT1G19800	AT5G15110	AT1G08190																	AT3G56060										AT5G48940	AT1G62300			ATCG00070
		AT1G19835	ATMG00180	AT1G68480																	AT1G72220										AT3G13682	AT2G34357			AT5G43510
		AT1G19840	AT4G28000	AT1G68490																	AT3G12600										AT3G25660	AT1G18130			AT2G29620
		AT1G19850	AT1G72960	AT1G68500																	AT5G06370										AT3G56230	AT4G36515			AT3G61070
		AT1G19870	AT3G52600	AT1G68520																	AT5G19090										AT3G13280	AT3G15990			AT5G54860
		AT1G19880	AT5G47600	AT1G68530																	AT4G34700										AT1G20540	AT3G01360			AT3G08640
		AT1G19890	AT1G69040	AT1G68540																	AT4G36900										AT1G50480	AT5G13565			AT4G23430
		AT1G19930	AT1G43600	AT1G68550																	AT5G04760										AT5G51170	AT5G18810			AT1G75388
		AT1G19980	AT3G17060	AT1G68560																	AT1G73390										AT2G45250	AT1G49760			AT1G51355
		AT1G20010	AT1G48570	AT1G68570																	AT5G18680										AT1G23060	AT3G24465			AT1G74380
		AT1G20030	AT2G17240	AT1G68580																	AT5G58130										AT3G20940	AT3G05155			AT5G15740
		AT1G20060	AT1G01060	AT1G68590																	AT5G59930										ATCG00300	AT5G41060			AT4G01950
		AT1G20070	AT5G05210	AT1G68650																	AT2G27860										AT4G25740	AT5G49330			AT4G00350
		AT1G20080	AT1G29670	AT1G68670																	AT2G43240										AT2G22125	AT5G03900			AT2G04080
		AT1G20090	AT4G32510	AT1G68680																	AT2G42190										AT5G14470	AT1G13740			AT3G25760
		AT1G20110	AT3G16120	AT1G68710																	AT5G21280										AT4G34690	AT5G50990			AT4G03480
		AT1G20160	AT4G22780	AT1G68720																	AT2G36460										AT2G42230	AT3G24580			AT3G25020
		AT1G20270	AT2G11910	AT1G68790																	AT1G51140										AT5G01800	AT5G14900			AT2G39851
		AT1G20300	AT1G22990	AT1G68800																	AT3G13000										AT3G11860	AT3G11200			AT1G74890
		AT1G20340	AT1G30710	AT1G68820																	AT1G24440										AT2G45320	AT1G11320			AT5G45800
		AT1G20350	AT4G35060	AT1G68825																	AT5G63050										AT5G27730	AT4G32090			AT1G61610
		AT1G20370	AT1G71830	AT1G68830																	AT5G53570										AT4G14905	AT3G29140			AT4G33985
		AT1G20380	AT2G38820	AT1G68862																	AT5G07430										AT1G27310	AT4G39403			AT2G32130
		AT1G20430	AT1G78476	AT1G68875																	AT1G01630										AT3G23910	AT3G52250			AT5G38210
		AT1G20440	AT3G48780	AT1G08250																	AT2G16990										AT1G04360	AT4G14150			AT3G09600
		AT1G20450	AT3G33004	AT1G68920																	AT5G01750										AT5G56050	AT5G14400			AT5G11360
		AT1G20460	AT3G56360	AT1G68990																	AT5G08290										AT5G66750	AT2G16640			AT1G17990
		AT1G20490	AT4G18830	AT1G69030																	AT2G34380										AT1G28360	AT1G67060			AT2G32235
		AT1G20510	AT1G78480	AT1G69040																	AT5G62340										AT5G02630	AT3G51510			AT5G19520
		AT1G20540	AT5G19900	AT1G69050																	AT3G52450										AT3G18910	AT3G17710			AT3G49307
		AT1G20550	AT3G28820	AT1G69060																	AT1G77750										AT2G02765	AT4G04850			AT2G37900
		AT1G20570	AT1G74970	AT1G69070																	AT3G57460										AT5G28460	AT3G15440			AT2G04400
		AT1G20575	ATMG01180	AT1G69150																	AT5G13450										AT3G18215	AT5G57320			AT1G54040
		AT1G20610	AT4G35000	AT1G69160																	AT4G11990										AT4G13640	AT2G47760			AT1G62540
		AT1G20620	AT5G64330	AT1G69170																	AT1G20080										AT1G55540	AT4G30640			AT3G45640
		AT1G20630	AT3G50690	AT1G69260																	AT3G14310										AT3G56110	AT5G66150			AT3G17170
		AT1G20640	AT4G31020	AT1G69270																	AT3G05935										AT5G07340	AT1G09700			AT4G22710
		AT1G20650	AT1G18210	AT1G69295																	AT2G18700										AT2G39670	AT1G19700			AT1G52040
		AT1G20670	AT2G39855	AT1G69310																	AT5G58120										AT5G37010	AT1G68680			AT5G36260
		AT1G20690	AT3G46520	AT1G69320																	AT2G43420										AT1G01910	AT5G18500			AT3G44750
		AT1G20696	AT2G26040	AT1G69360																	AT5G22910										AT2G29740	AT5G61330			AT4G15210
		AT1G20760	AT1G28305	AT1G08270																	AT1G80910										AT2G36220	AT1G10690			AT5G61290
		AT1G20780	AT5G52640	AT1G69370																	AT4G37608										AT5G37780	AT3G54970			AT3G56220
		AT1G20823	AT1G68810	AT1G69410																	AT2G42040										AT5G65450	AT4G16310			AT5G55820
		AT1G20850	AT3G59930	AT1G69420																	AT3G01070										AT5G15820	AT4G20260			AT5G10280
		AT1G20875	AT4G24680	AT1G69470																	AT1G01550										AT4G36280	AT3G02790			AT5G24420
		AT1G20890	AT1G61290	AT1G69526																	AT1G69270										AT2G35736	AT5G18840			AT3G57070
		AT1G20900	AT2G46260	AT1G69530																	AT5G47010										AT2G45000	AT1G02890			AT3G60530
		AT1G20910	AT2G45950	AT1G69540																	AT1G23100										AT5G54260	AT3G56090			AT5G53810
		AT1G20960	AT2G19190	AT1G69550																	AT4G26210										AT5G53940	AT4G38980			AT5G58170
		AT1G20990	AT5G55170	AT1G69560																	AT1G74940										AT1G67930	AT1G11608			AT5G47240
		AT1G21000	AT3G28810	AT1G69570																	AT4G32272										AT3G26445	AT5G48890
		AT1G21050	AT5G58660	AT1G69580																	AT5G46690										AT2G18670	AT1G78160
		AT1G21065	AT1G17300	AT1G69600																	AT3G57110										AT3G56590	AT3G01990
		AT1G21080	AT2G21940	AT1G69610																	AT3G63460										AT3G05300	AT2G15730
		AT1G21150	AT1G19220	AT1G69650																	AT2G39220										AT5G21430	AT2G47950
		AT1G21200	AT2G21300	AT1G69690																	AT4G16141										AT5G57815	AT5G15745
		AT1G21250	AT1G24530	AT1G69760																	AT2G45440										AT1G49410	AT2G46760
		AT1G21270	AT5G57655	AT1G69770																	AT1G13360										AT4G36030	ATCG00180
		AT1G21320	AT1G05960	AT1G69780																	AT2G34655										AT3G26610	AT4G31750
		AT1G21360	AT5G38210	AT1G01710																	AT3G15890										AT1G73120	AT4G25300
		AT1G21390	AT4G00335	AT1G69810																	AT5G16400										AT3G17950	AT3G15353
		AT1G21400	AT2G18270	AT1G69818																	AT3G10770										AT3G27809	AT4G01270
		AT1G21440	AT3G13227	AT1G69830																	AT5G67370										AT5G52880	AT4G22260
		AT1G21450	AT2G46360	AT1G08340																	AT3G55110										AT3G16810	AT5G08430
		AT1G21460	AT4G24170	AT1G69860																	AT3G29173										AT3G10280	AT4G17610
		AT1G21480	AT1G21680	AT1G69870																	AT3G04735										AT4G17200	AT3G01590
		AT1G21530	AT4G32630	AT1G69890																	AT5G28840										AT5G24390	AT4G35220
		AT1G21560	AT2G07749	AT1G69900																	AT4G36690										AT1G69120	AT4G05010
		AT1G21580	AT1G11770	AT1G69920																	AT4G40042										AT1G75660	AT3G04500
		AT1G21600	AT1G58110	AT1G69930																	AT1G10370										AT3G20270	AT5G02740
		AT1G21630	AT1G03050	AT1G69970																	AT4G26860										AT4G26500	AT5G62600
		AT1G21640	AT5G36260	AT1G69980																	AT3G23805										AT2G45610	AT5G07780
		AT1G21660	AT5G22320	AT1G70000																	AT1G09575										AT1G23290	AT1G34550
		AT1G21670	AT5G13990	AT1G70020																	AT1G52290										AT1G76510	AT3G05120
		AT1G21722	AT2G47340	AT1G70060																	AT3G14595										AT1G20110	AT5G53480
		AT1G21730	AT2G17930	AT1G70100																	AT3G48030										AT5G62620	AT2G27505
		AT1G21740	AT5G24490	AT1G08390																	AT1G52618										AT3G29090	AT3G44610
		AT1G21738	AT3G10460	AT1G70209																	AT5G42620										AT1G63100	AT5G48720
		AT1G21750	AT3G10410	AT1G70220																	AT5G58520										AT1G55200	AT3G50090
		AT1G21780	AT1G69780	AT1G70230																	AT5G13460										AT4G18375	AT2G47350
		AT1G21810	AT3G09760	AT1G70250																	AT5G65420										AT2G02910	AT4G31400
		AT1G21830	AT3G16840	AT1G70260																	AT3G14981										AT3G47000	AT3G55600
		AT1G21835	AT3G25020	AT1G70280																	AT5G55470										AT3G19500	AT5G20810
		AT1G21880	AT2G22360	AT1G70290																	AT4G36860										AT3G22890	AT4G26120
		AT1G21890	AT5G41780	AT1G70300																	AT3G44530										AT5G14550	AT1G06140
		AT1G21900	AT3G22750	AT1G70310																	AT5G21940										AT2G01070	AT3G05280
		AT1G21910	AT1G28100	AT1G08410																	AT5G60920										AT5G02700	AT3G62710
		AT1G21920	AT2G28640	AT1G70335																	AT5G58700										AT3G04050	AT3G23820
		AT1G21925	AT3G44750	AT1G70360																	AT1G11960										AT1G77990	AT3G17840
		AT1G21970	AT4G34290	AT1G70370																	AT4G19390										AT1G06760	AT5G42130
		AT1G21980	AT2G43780	AT1G70380																	AT3G63270										AT2G36295	AT2G37450
		AT1G21990	AT3G53140	AT1G70410																	AT5G11650										AT5G61490	AT4G09320
		AT1G22030	AT3G50810	AT1G70420																	AT1G02740										AT1G71310	AT4G19450
		AT1G22050	AT1G72645	AT1G70430																	AT3G15210										AT2G46970	AT1G27910
		AT1G22060	AT3G25890	AT1G70470																	AT5G18570										AT3G01370	AT2G29670
		AT1G22065	ATCG01040	AT1G70480																	AT4G38520										AT5G13350	AT5G40460
		AT1G22070	AT1G28060	AT1G08420																	AT1G76680										AT1G32580	AT3G62570
		AT1G22160	AT5G58170	AT1G70510																	AT4G17410										AT3G14190	AT5G02970
		AT1G22180	AT5G20950	AT1G70530																	AT5G54150										AT3G15060	AT5G15030
		AT1G22210	AT3G18530	AT1G70540																	AT5G12480										AT2G20635	AT3G01380
		AT1G22275	AT4G33770	AT1G70550																	AT4G00200										AT5G07060	AT4G38350
		AT1G22280	AT1G55570	AT1G01715																	AT1G34245										AT4G27845	AT3G63410
		AT1G22310	AT1G28270	AT1G70560																	AT5G02410										AT5G11580	AT5G09450
		AT1G22410	AT5G10660	AT1G70570																	AT2G28890										AT1G11220	AT5G07150
		AT1G22440	AT1G60240	AT1G70590																	AT2G40830										AT2G22730	AT1G77360
		AT1G22460	AT2G13620	AT1G70600																	AT5G04550										AT3G07400	AT1G54120
		AT1G22480	AT1G14440	AT1G70630																	AT3G03550										AT2G07655	AT5G04920
		AT1G22520	AT5G43030	AT1G70640																	AT1G54130										AT4G34930	AT3G43230
		AT1G22540	AT2G22680	AT1G70660																	AT5G60840										AT3G26980	AT3G10974
		AT1G22600	AT2G43970	AT1G70670																	AT1G14840										AT1G28110	AT5G64750
		AT1G22620	AT3G63400	AT1G70690																	AT3G07020										AT5G40840	AT3G54400
		AT1G22630	AT5G27780	AT1G70700																	AT1G30040										AT4G20720	AT4G00310
		AT1G22640	AT4G12560	AT1G70710																	AT3G56870										AT4G15250	AT1G12740
		AT1G22650	AT2G27470	AT1G70720																	AT4G37780										ATCG01090	AT4G31170
		AT1G22700	AT3G20865	AT1G70730																	AT4G35070										AT3G02770	AT2G39830
		AT1G22770	AT1G18460	AT1G70740																	AT1G72210										AT3G62470	AT5G09230
		AT1G22830	AT3G61590	AT1G70750																	AT2G41530										AT2G23780	AT2G26350
		AT1G22880	AT3G52740	AT1G70780																	AT2G39870										AT1G04700	AT5G57550
		AT1G22920	AT5G23170	AT1G70790																	AT3G53620										AT5G66230	AT3G58620
		AT1G22930	AT5G56360	AT1G70830																	AT5G49470										AT3G44820	AT1G69690
		AT1G22980	AT3G11480	AT1G70860																	AT3G53380										AT4G00210	AT2G25760
		AT1G22985	AT3G22275	AT1G08460																	AT3G06483										AT3G52830	AT2G30280
		AT1G22990	AT4G15210	AT1G70890																	AT1G70300										AT1G23480	AT4G36120
		AT1G23000	AT5G24770	AT1G70900																	AT5G65670										AT3G56790	AT3G06970
		AT1G23020	AT4G23600	AT1G70940																	AT2G01680										AT5G05660	AT5G15100
		AT1G23030	AT1G06620	AT1G70949																	AT5G56310										AT3G20250	AT4G36980
		AT1G23040	AT5G05600	AT1G08465																	AT3G58090										AT1G65320	AT1G22780
		AT1G23060	AT4G04830	AT1G70990																	AT2G23150										AT2G03730	AT3G22790
		AT1G23070	AT1G17420	AT1G71000																	AT5G02580										AT4G21210	AT3G10270
		AT1G23080	AT5G07010	AT1G71010																	AT1G17235										AT5G05400	AT4G31880
		AT1G23090	AT2G32150	AT1G71040																	AT5G01190										AT4G21720	AT1G61230
		AT1G23100	AT1G70700	AT1G71080																	AT4G14540										AT4G32000	AT5G54640
		AT1G23190	AT1G06640	AT1G71090																	AT5G43900										AT2G45070	AT3G05100
		AT1G23205	AT1G72450	AT1G71100																	AT1G01570										AT4G04960	AT5G09770
		AT1G23220	AT1G17380	AT1G71110																	AT1G29355										AT5G42990	AT4G16807
		AT1G23280	AT4G08870	AT1G71140																	AT5G09330										AT4G37810	AT4G15000
		AT1G23290	AT1G24070	AT1G71170																	AT3G56860										AT1G02145	AT2G31850
		AT1G23310	AT3G22740	AT1G71235																	AT3G15460										AT2G03190	AT4G39190
		AT1G23360	AT2G43530	AT1G08500																	AT4G24960										AT1G77540	AT5G24990
		AT1G23380	AT2G36590	AT1G71350																	AT4G31850										AT1G50650	AT5G11800
		AT1G23390	AT4G39940	AT1G08510																	AT3G11397										AT3G47470	AT3G08010
		AT1G23480	AT2G04160	AT1G71440																	AT3G02530										AT1G05140	AT1G64670
		AT1G23550	AT1G16410	AT1G71460																	AT2G41560										AT2G37110	AT5G56140
		AT1G23710	AT5G67210	AT1G71500																	AT5G04320										AT4G01470	AT1G09780
		AT1G23750	AT1G44350	AT1G71520																	AT3G53530										AT1G20370	AT1G29435
		AT1G23770	AT1G52410	AT1G71530																	AT5G22620										AT4G21480	AT1G50030
		AT1G23780	AT5G28237	AT1G01720																	AT4G30960										AT3G04370	AT4G24440
		AT1G23810	AT1G73325	AT1G71692																	AT4G20880										AT5G60180	AT1G62350
		AT1G23820	AT1G54020	AT1G71695																	AT1G71970										AT3G06590	AT4G17620
		AT1G23860	AT4G21680	AT1G71696																	AT3G47060										AT2G42400	AT5G45280
		AT1G23870	AT1G80130	AT1G71710																	AT4G34600										AT3G56690	AT1G11050
		AT1G23965	AT2G37900	AT1G71720																	AT4G38670										AT3G23710	AT5G25560
		AT1G23980	AT2G46650	AT1G71760																	AT2G22850										AT5G61850	AT5G02310
		AT1G24000	AT1G61120	AT1G71770																	AT5G53200										AT4G29000	AT1G72350
		AT1G24040	AT1G31550	AT1G71780																	AT3G05380										AT2G30680	AT2G42890
		AT1G24070	AT1G11580	AT1G71810																	AT1G01680										AT5G62970	AT1G79440
		AT1G24095	AT2G24850	AT1G71820																	AT2G46020										AT3G60286	AT4G24840
		AT1G24120	AT1G48600	AT1G71830																	AT2G01660										AT1G12540	AT2G40060
		AT1G24130	AT1G48598	AT1G71860																	AT1G60800										AT3G60620	AT5G17470
		AT1G24170	AT1G62540	AT1G71870																	AT3G01450										AT1G17280	AT5G54960
		AT1G24180	AT1G78370	AT1G71880																	AT2G23770										AT2G21195	AT3G11320
		AT1G24260	AT1G18140	AT1G08540																	AT5G06839										AT3G16660	AT2G25110
		AT1G24265	AT4G01080	AT1G71960																	AT2G44175										AT4G37930	AT1G21790
		AT1G24267	AT4G02360	AT1G71970																	AT1G70780										AT3G54090	AT2G23350
		AT1G24280	AT3G02500	AT1G71980																	AT2G22760										AT5G23230	AT4G30240
		AT1G24440	AT4G16590	AT1G72030																	AT1G06045										AT1G54310	AT1G53700
		AT1G24460	AT2G43550	AT1G08560																	AT1G18300										AT1G52870	AT3G11490
		AT1G24530	AT2G39330	AT1G72050																	AT1G73680										ATMG00510	AT5G62100
		AT1G24540	AT4G38400	AT1G08570																	AT5G04750										AT1G09850	AT5G20510
		AT1G24577	AT5G17540	AT1G72090																	AT2G26720										AT1G11591	AT1G51965
		AT1G24600	AT3G16400	AT1G72100																	AT5G65380										AT3G13880	AT3G24190
		AT1G24625	AT2G38750	AT1G72141																	AT3G15020										AT1G80625	AT1G73200
		AT1G24650	AT3G55970	AT1G72150																	AT1G21990										AT5G08660	AT2G26840
		AT1G24706	AT5G50950	AT1G72160																	AT4G39620										AT1G07020	AT4G34340
		AT1G24764	AT1G29050	AT1G72170																	AT5G65060										AT3G07420	AT4G22990
		AT1G24851	AT1G74950	AT1G72175																	AT5G64560										AT2G18420	AT4G03550
		AT1G25025	AT1G19180	AT1G72180																	AT2G03070										AT1G08720	AT1G78850
		AT1G25097	AT5G24420	AT1G72210																	AT5G40340										AT4G17530	AT4G20310
		AT1G25112	AT5G48850	AT1G72220																	AT1G06180										AT1G70400	AT5G14170
		AT1G25180	AT1G51760	AT1G72230																	AT5G09960										AT1G78750	AT3G15909
		AT1G25220	AT2G34600	AT1G72275																	AT1G73580										AT5G58630	AT3G04270
		AT1G25230	AT5G27350	AT1G08590																	AT2G44070										AT3G08990	AT3G18490
		AT1G25250	AT4G14040	AT1G72310																	AT4G03520										AT2G32640	AT2G06000
		AT1G25260	AT3G45140	AT1G72320																	AT5G65120										AT5G23290	AT3G57220
		AT1G25330	AT3G25780	AT1G72340																	AT5G49810										AT1G76250	AT1G03440
		AT1G25370	AT1G19670	AT1G72350																	AT5G65950										AT1G23750	AT5G18850
		AT1G25375	AT3G16470	AT1G72410																	AT3G52220										AT1G76120	AT1G34570
		AT1G25425	AT1G54040	AT1G72430																	AT5G51330										AT5G26770	AT1G03687
		AT1G25440	AT1G23850	AT1G72450																	AT1G73170										AT5G63750	AT3G46000
		AT1G25450	AT2G29350	AT1G72460																	AT2G01510										AT3G07710	AT1G09020
		AT1G25480	AT2G06050	AT1G72470																	AT5G44820										AT1G15270	AT1G74160
		AT1G25490	AT4G10290	AT1G72490																	AT1G08010										AT1G30610	AT5G04220
		AT1G25500	AT5G02940	AT1G72500																	AT1G78090										AT4G36190	AT4G23496
		AT1G25510	AT5G57420	AT1G72510																	AT5G09860										AT2G40880	AT5G05320
		AT1G25520	AT1G52040	AT1G72520																	AT4G26110										AT1G17110	AT5G11750
		AT1G25540	AT5G14200	AT1G72560																	AT1G68160										AT2G37190	AT5G16760
		AT1G25550	AT3G51450	AT1G72610																	AT3G63030										AT2G44370	AT4G23410
		AT1G25560	AT5G53750	AT1G72620																	AT2G32270										AT1G24130	AT5G61580
		AT1G25570	AT4G27860	AT1G72630																	AT5G02240										AT4G30570	AT5G05840
		AT1G25580	AT1G72520	AT1G72645																	AT3G20820										AT5G40382	AT2G21200
		AT1G25682	AT5G06870	AT1G72670																	AT1G78440										AT3G51690	AT1G17080
		AT1G26090	AT3G56200	AT1G72680																	AT2G32940										AT5G61350	AT4G36850
		AT1G26100	AT1G53903	AT1G72690																	AT5G16610										AT5G18150	AT5G41890
		AT1G26110	AT1G53885	AT1G72700																	AT1G71780										AT3G27999	AT3G02250
		AT1G26170	AT1G15360	AT1G08620																	AT1G17830										AT5G43940	AT1G72030
		AT1G26230	AT1G52030	AT1G72710																	AT3G51670										AT5G10540	AT1G50620
		AT1G26240	AT1G21525	AT1G72740																	AT3G11040										AT5G13560	AT1G53165
		AT1G26270	AT5G56980	AT1G72760																	AT5G01590										AT5G38480	AT3G57600
		AT1G26300	AT3G19710	AT1G72770																	AT1G76230										AT4G12310	AT2G30432
		AT1G26330	AT2G43535	AT1G72800																	AT1G01130										AT1G01160	AT2G23740
		AT1G26370	AT4G30530	AT1G72810																	AT3G20310										AT1G11170	AT5G45600
		AT1G26460	AT1G43160	AT1G72820																	AT5G60670										AT1G35467	AT3G25940
		AT1G26470	AT5G42180	AT1G72830																	AT2G29654										AT1G24600	AT4G36350
		AT1G26540	AT3G49270	AT1G72880																	AT2G33410										AT5G59710	AT1G02590
		AT1G26570	AT2G01850	AT1G72950																	AT1G49780										AT2G22510	AT5G48200
		AT1G26590	AT5G43650	AT1G01740																	AT2G35820										AT1G49880	AT2G23030
		AT1G26620	AT3G26960	AT1G73066																	AT3G59435										AT2G36340	AT1G75470
		AT1G26630	AT3G44310	AT1G73090																	AT1G03730										AT3G25805	AT1G54060
		AT1G26740	AT4G37430	AT1G73170																	AT1G61330										AT5G10530	AT4G30180
		AT1G26773	AT5G10300	AT1G08650																	AT5G19010										AT3G17920	AT1G05065
		AT1G26790	AT3G58990	AT1G73200																	AT2G41310										AT1G08520	AT1G03190
		AT1G26800	AT2G17230	AT1G73210																	AT5G35630										AT4G14790	AT3G26935
		AT1G26820	AT3G16410	AT1G08645																	AT1G68560										AT3G48740	AT5G25190
		AT1G26840	AT1G30530	AT1G73220																	AT5G56510										AT3G60600	AT3G09000
		AT1G26910	AT4G18290	AT1G73250																	AT3G05470										AT3G62530	AT5G46795
		AT1G26920	AT3G26840	AT1G73310																	AT4G00720										AT5G53880	AT2G33655
		AT1G26921	AT3G23730	AT1G08660																	AT5G61150										AT1G04960	AT2G38710
		AT1G26930	AT5G59820	AT1G73340																	AT1G77660										AT2G24765	AT1G55250
		AT1G26940	AT3G03780	AT1G73350																	AT3G07700										AT3G12720	AT5G48170
		AT1G26960	AT1G75910	AT1G73380																	AT3G15860										AT1G05085	AT1G76090
		AT1G27045	AT2G34810	AT1G73390																	AT1G30130										AT5G57340	AT3G07550
		AT1G27100	AT1G65890	AT1G73440																	AT5G64530										AT2G45430	AT5G45100
		AT1G27130	AT4G27280	AT1G73460																	AT5G51460										AT1G02490	AT1G44100
		AT1G27140	AT3G12145	AT1G73500																	AT1G31300										AT5G61590	AT5G63710
		AT1G27200	AT5G05340	AT1G73510																	AT4G20280										AT4G38050	AT5G56290
		AT1G27210	AT2G32487	AT1G73540																	AT5G55950										AT1G62430	AT2G43770
		AT1G27220	AT2G43100	AT1G73580																	AT5G51040										AT4G36795	AT5G49700
		AT1G27290	AT4G32800	AT1G73590																	AT2G32800										AT1G20575	AT2G21250
		AT1G27310	AT1G24170	AT1G73600																	AT3G61826										AT5G05240	AT1G10060
		AT1G27320	AT1G45145	AT1G73610																	AT2G47450										AT5G02080	AT2G10025
		AT1G27330	AT5G63160	AT1G73630																	AT1G74700										AT5G22300	AT1G30780
		AT1G27340	AT4G08950	AT1G08680																	AT1G20340										AT2G41770	AT1G26762
		AT1G27350	AT1G61610	AT1G73660																	AT1G09530										AT1G28380	AT5G11390
		AT1G27360	AT2G20870	AT1G73670																	AT1G67050										AT3G20170	AT5G66250
		AT1G27370	AT5G26220	AT1G73680																	AT1G49170										AT3G20460	AT2G04240
		AT1G27390	AT2G37770	AT1G73690																	AT1G26840										AT4G37910	AT1G09800
		AT1G27400	AT3G19700	AT1G08710																	AT1G74750										AT5G59990	AT1G01225
		AT1G27440	AT4G10770	AT1G73720																	AT5G45590										AT1G10150	AT4G01710
		AT1G27540	AT2G41475	AT1G73730																	AT1G21660										AT1G02180	AT3G57900
		AT1G27640	AT2G05940	AT1G73750																	AT5G49650										AT5G19570	AT5G03720
		AT1G27760	AT5G23210	AT1G73770																	AT5G42750										AT1G01520	AT1G14970
		AT1G27840	AT1G30135	AT1G73805																	AT1G47870										AT1G53500	AT4G12382
		AT1G27850	AT1G68600	AT1G73820																	AT4G26640										AT1G16240	AT5G63770
		AT1G27890	AT5G24780	AT1G73830																	AT3G09390										AT1G14160	AT4G12080
		AT1G27920	AT1G18590	AT1G73875																	AT1G48850										AT5G66005	AT5G57760
		AT1G27930	AT2G47180	AT1G73885																	AT3G04400										AT4G25540	AT2G45560
		AT1G27940	AT4G27560	AT1G73910																	AT4G13195										AT5G63640	AT1G18940
		AT1G27980	AT1G14250	AT1G73960																	AT5G12410										AT5G23250	AT4G25433
		AT1G28050	AT3G07340	AT1G73980																	AT5G11730										AT4G01330	AT4G25520
		AT1G28060	AT1G22882	AT1G74030																	AT3G05370										AT5G43330	AT2G37925
		AT1G28080	AT1G30760	AT1G74060																	AT1G51690										AT5G09680	AT1G59910
		AT1G28090	AT2G21140	AT1G74070																	AT1G75060										AT5G58440	AT3G06570
		AT1G28100	AT3G21800	AT1G74088																	AT5G66580										AT5G43780	AT3G61760
		AT1G28110	AT4G13770	AT1G74100																	AT1G63640										AT3G18740	AT4G23820
		AT1G28120	AT3G45130	AT1G74160																	AT1G70250										AT3G13857	AT2G27050
		AT1G28130	AT5G24660	AT1G74180																	AT4G25580										AT2G40980	AT1G15000
		AT1G28135	AT2G33380	AT1G74280																	AT1G55510										AT1G69190	AT3G62120
		AT1G28140	AT4G03400	AT1G74300																	AT4G36710										AT1G55535	AT1G07440
		AT1G28250	AT5G13220	AT1G74330																	AT1G70660										AT3G01850	AT1G11160
		AT1G28265	AT5G67110	AT1G74400																	AT1G70900										AT4G24040	AT3G21180
		AT1G28260	AT1G58270	AT1G74410																	AT5G39080										AT1G31460	AT3G04940
		AT1G28280	AT4G23990	AT1G74430																	AT3G54220										AT2G18020	AT4G14940
		AT1G28290	AT3G44300	AT1G74440																	AT5G09760										AT4G00090	AT1G24570
		AT1G28300	AT5G44720	AT1G74450																	AT5G04470										AT1G58470	AT2G22340
		AT1G28320	AT2G25810	AT1G74470																	AT1G26921										AT1G21970	AT5G57160
		AT1G28335	AT4G29700	AT1G74510																	AT2G38180										AT5G29560	ATMG01360
		AT1G28360	AT1G61800	AT1G74530																	AT5G66730										AT5G64990	AT5G03050
		AT1G28380	AT4G15440	AT1G74620																	AT4G35040										AT1G64510	AT2G27350
		AT1G28430	AT1G08920	AT1G74640																	AT2G45790										AT1G16900	AT1G21380
		AT1G28440	AT5G59780	AT1G74660																	AT3G43580										AT1G48270	AT3G58180
		AT1G28490	AT3G49580	AT1G74670																	AT4G27050										AT3G21760	AT2G45330
		AT1G28630	AT3G17390	AT1G74700																	AT4G13940										AT5G24300	AT1G19660
		AT1G28640	AT3G03280	AT1G74710																	AT1G22830										AT4G21450	AT1G19100
		AT1G28680	AT1G01250	AT1G74720																	AT1G09630										AT4G21330	AT1G03370
		AT1G28960	AT1G55330	AT1G74740																	AT4G36550										AT1G11690	AT3G11950
		AT1G29050	AT4G30440	AT1G74750																	AT2G46370										AT5G61190	AT2G35800
		AT1G29060	AT4G12730	AT1G08760																	AT1G75450										AT3G17626	AT2G35658
		AT1G29070	AT3G44720	AT1G74800																	AT2G35630										AT2G29140	AT4G35140
		AT1G29220	AT1G76800	AT1G74810																	AT2G31760										AT2G14045	AT1G21410
		AT1G29230	AT1G74660	AT1G08780																	AT1G75860										AT5G43280	AT5G66130
		AT1G29260	AT1G52890	AT1G74840																	AT3G09970										AT3G53970	AT1G03106
		AT1G29270	AT1G20510	AT1G74860																	AT1G67880										AT3G01140	AT5G12240
		AT1G29290	AT5G36220	AT1G74870																	AT1G54630										AT5G66920	AT3G55950
		AT1G29300	AT2G46510	AT1G74900																	AT2G16720										AT1G14010	AT1G02330
		AT1G29330	AT2G29450	AT1G74930																	AT5G58140										AT3G25727	AT5G49710
		AT1G29340	AT1G52400	AT1G74940																	AT3G05210										AT3G06820	AT4G28310
		AT1G29355	AT1G62560	AT1G74950																	AT1G76870										AT5G58540	AT3G18730
		AT1G29390	AT3G50060	AT1G74970																	AT1G76185										AT1G20270	AT3G20830
		AT1G29400	AT1G07135	AT1G75000																	AT1G14590										AT1G53240	AT4G25960
		AT1G29440	AT2G16890	AT1G75020																	AT1G79940										AT3G06950	AT3G03230
		AT1G29470	AT3G28300	AT1G08800																	AT2G48160										AT5G53080	AT2G30505
		AT1G29490	AT3G28290	AT1G75060																	AT3G58610										AT1G55675	AT4G13400
		AT1G29550	AT1G17620	AT1G75080																	AT2G02070										AT1G26300	AT4G08510
		AT1G29630	AT4G11310	AT1G75090																	AT2G22426										AT5G48550	AT1G53110
		AT1G29660	AT5G41380	AT1G75100																	AT3G05110										AT3G13490	AT1G79540
		AT1G29870	AT3G44860	AT1G75110																	AT5G58710										AT3G11570	AT4G24520
		AT1G29880	AT5G50800	AT1G75160																	AT3G61810										AT1G08470	AT1G69930
		AT1G29970	AT4G29780	AT1G08820																	AT3G48520										AT5G08320	AT4G01210
		AT1G30010	AT1G25530	AT1G75170																	AT3G13460										AT4G18280	AT3G04790
		AT1G30040	AT4G04610	AT1G75180																	AT2G38330										AT1G74270	AT2G26510
		AT1G30050	AT1G74930	AT1G75220																	AT2G40460										AT1G72250	AT3G55350
		AT1G30070	AT4G03060	AT1G75230																	AT2G20330										AT3G17770	AT5G46400
		AT1G30080	AT3G13662	AT1G75240																	AT1G06990										AT1G21880	AT1G04290
		AT1G30090	AT4G36950	AT1G75250																	AT4G01395										AT4G23760	AT2G14255
		AT1G30110	AT4G21910	AT1G75280																	AT4G39550										AT3G49650	AT5G56440
		AT1G30120	AT2G44840	AT1G75300																	AT5G15550										AT1G10940	AT5G49665
		AT1G30130	AT5G59920	AT1G75310																	AT3G08020										AT1G52980	AT1G11000
		AT1G30190	AT5G36160	AT1G01770																	AT2G41020										AT3G62160	AT5G25450
		AT1G30200	AT1G64200	AT1G75350																	AT4G25390										AT4G34555	AT1G80530
		AT1G30210	AT3G12143	AT1G75380																	AT3G62050										AT3G19440	AT2G35050
		AT1G30230	AT5G57560	AT1G75390																	AT3G13930										AT3G02560	AT5G10560
		AT1G30240	AT5G09980	AT1G75400																	AT5G01020										AT4G29170	AT2G03440
		AT1G30280	AT4G00670	AT1G75420																	AT3G50080										AT3G45770	AT5G48820
		AT1G30300	AT2G27690	AT1G75440																	AT5G06540										AT1G77490	AT5G11300
		AT1G30320	AT3G44260	AT1G75450																	AT2G23290										AT1G69250	AT5G60490
		AT1G30330	AT3G05165	AT1G75460																	AT1G15420										AT3G06450	AT1G29930
		AT1G30350	AT5G65280	AT1G75470																	AT1G67840										AT3G27220	AT5G67540
		AT1G30360	AT3G17120	AT1G75490																	AT1G64660										AT2G46210	AT1G05450
		AT1G30370	AT1G80120	AT1G75500																	AT4G32450										AT1G53670	AT3G16620
		AT1G30380	AT5G23010	AT1G75530																	AT5G21150										AT3G51270	AT3G27350
		AT1G30400	AT3G19680	AT1G75540																	AT2G46580										AT3G02220	AT1G79360
		AT1G30480	AT4G17500	AT1G75560																	AT1G03080										AT5G53820	AT5G43190
		AT1G30500	AT1G74100	AT1G75580																	AT3G53270										AT3G14067	AT2G26650
		AT1G30520	AT5G21960	AT1G75590																	AT2G47680										AT2G22860	AT1G44810
		AT1G30540	AT3G62700	AT1G08845																	AT1G80010										AT5G16360	AT5G05280
		AT1G30550	AT5G23820	AT1G75600																	AT5G48030										AT3G60960	AT2G16460
		AT1G30560	AT4G35320	AT1G75620																	AT4G26610										AT1G01700	AT1G73885
		AT1G30570	AT4G27480	AT1G75630																	AT5G42950										AT1G14150	AT3G03820
		AT1G30610	AT1G28600	AT1G75640																	AT3G02540										AT1G03490	AT4G30940
		AT1G30620	AT4G30650	AT1G75710																	AT5G41401										AT5G23050	AT1G62040
		AT1G30640	AT3G50280	AT1G75730																	AT5G15870										AT2G40150	AT4G28880
		AT1G30650	AT5G50915	AT1G75750																	AT2G01410										AT3G49710	ATMG00630
		AT1G30660	AT3G26440	AT1G75760																	AT1G78990										AT2G42330	AT5G41310
		AT1G30680	AT2G39030	AT1G75770																	AT1G77740										AT3G02390	AT5G10550
		AT1G30690	AT4G27570	AT1G75780																	AT3G52910										AT1G19600	AT3G50560
		AT1G30900	AT1G19550	AT1G75790																	AT1G08760										AT2G18460	AT3G18480
		AT1G31020	AT5G40210	AT1G75810																	AT2G36305										AT3G55890	AT1G52150
		AT1G31040	AT1G76790	AT1G75820																	AT3G50230										AT2G40316	AT2G44820
		AT1G31070	AT5G61290	AT1G75840																	AT5G03885										AT1G18340	AT3G14750
		AT1G31095	AT3G05400	AT1G75860																	AT3G05170										AT5G05550	AT4G39640
		AT1G31130	AT3G18777	AT1G75870																	AT4G27960										AT2G03040	AT2G16485
		AT1G31300	AT4G17470	AT1G75880																	AT5G08535										AT5G63880	AT4G00840
		AT1G31330	AT5G63450	AT1G75890																	AT1G60140										AT5G06340	AT4G33180
		AT1G31340	AT1G60960	AT1G75900																	AT4G34590										AT3G09690	AT3G52150
		AT1G31350	AT1G32640	AT1G75940																	AT5G48900										AT1G20850	AT1G64330
		AT1G31360	AT3G02570	AT1G75950																	AT1G78620										AT3G17930	AT3G07790
		AT1G31420	AT4G22010	AT1G75960																	AT1G01190										AT4G00940	AT5G43710
		AT1G31460	AT3G29575	AT1G76010																	AT1G69970										AT3G52040	AT3G06660
		AT1G31470	AT3G03190	AT1G76040																	AT5G37020										AT1G05930	AT5G52020
		AT1G31760	AT4G14680	AT1G76050																	AT5G48385										AT4G00020	AT3G25716
		AT1G31790	AT1G28230	AT1G76060																	AT4G37530										AT1G22440	AT4G24710
		AT1G31812	AT1G19570	AT1G76070																	AT1G30690										AT3G23840	AT2G41300
		AT1G31814	AT4G00330	AT1G76090																	AT2G19090										AT5G24570	AT5G14750
		AT1G31840	AT1G61890	AT1G76100																	AT4G39040										AT2G34780	AT1G11112
		AT1G31870	AT4G09030	AT1G76110																	AT4G39100										AT1G76340	AT1G15490
		AT1G31880	AT4G13340	AT1G76160																	AT1G25550										AT1G26100	AT5G04110
		AT1G31885	AT1G67100	AT1G76170																	AT5G58530										AT4G22860	AT1G13210
		AT1G31910	AT1G75900	AT1G76180																	AT4G37630										AT3G59020	AT2G46250
		AT1G31930	AT3G02020	AT1G76185																	AT5G47170										AT1G75010	AT2G14520
		AT1G31940	AT4G21640	AT1G76230																	AT2G01430										AT4G31740	AT4G36195
		AT1G32060	AT5G33370	AT1G76240																	AT3G50750										AT3G27670	AT1G16515
		AT1G32090	AT5G13550	AT1G76280																	AT4G24150										AT5G46160	AT3G15730
		AT1G32127	AT2G48020	AT1G76350																	AT2G38280										AT1G12900	AT1G22330
		AT1G32190	AT5G10720	AT1G76360																	AT5G06260										AT5G60930	AT3G14940
		AT1G32210	AT3G20210	AT1G76370																	AT5G57000										AT1G69740	AT5G36880
		AT1G32225	AT1G27730	AT1G08920																	AT4G27700										AT2G34930	AT4G40090
		AT1G32230	AT3G44320	AT1G76380																	AT1G68440										AT4G01880	AT2G25920
		AT1G32240	AT4G37140	AT1G76400																	AT4G30200										AT4G26140	AT2G33385
		AT1G32360	AT4G31110	AT1G76410																	AT5G66700										AT3G48190	AT1G27430
		AT1G32400	AT3G49570	AT1G76420																	AT5G47455										AT5G39740	AT5G04540
		AT1G32500	AT5G42650	AT1G76430																	AT2G33870										AT3G04830	AT2G44100
		AT1G32550	AT1G43910	AT1G76490																	AT1G10740										AT5G62900	AT3G15120
		AT1G32580	AT4G33950	AT1G76550																	AT5G01520										AT2G26540	AT3G15880
		AT1G32610	AT2G26530	AT1G76570																	AT4G23740										AT1G19150	AT5G63000
		AT1G32630	AT5G42860	AT1G76580																	AT3G15980										AT2G38970	AT2G07715
		AT1G32650	AT1G80050	AT1G76590																	AT1G10290										AT1G04860	AT1G80240
		AT1G32690	AT5G18860	AT1G76610																	AT4G14590										AT3G48560	AT1G25275
		AT1G32700	AT1G54000	AT1G76620																	AT1G23810										AT3G24120	AT4G11920
		AT1G32730	AT4G14020	AT1G76630																	AT4G30600										AT5G23530	AT1G79985
		AT1G32750	AT3G59010	AT1G76660																	AT3G59060										AT1G08350	AT5G04090
		AT1G32790	AT5G17990	AT1G76670																	AT5G47560										AT4G31040	AT2G17700
		AT1G32810	AT2G20610	AT1G76680																	AT4G18760										AT1G26240	AT4G37022
		AT1G32910	AT2G23910	AT1G76705																	AT1G66145										AT5G26731	AT2G18560
		AT1G32920	AT3G29670	AT1G76730																	AT2G48060										AT3G54890	AT1G62200
		AT1G32928	AT4G19230	AT1G76760																	AT5G44060										AT4G30160	AT3G12040
		AT1G32930	AT4G27520	AT1G76790																	AT3G63010										AT3G60830	AT3G54020
		AT1G33030	AT4G30660	AT1G76820																	AT5G07175										AT1G27045	AT3G54840
		AT1G33120	AT2G24210	AT1G76870																	AT3G07110										AT2G46460	AT4G31700
		AT1G33140	AT3G08860	AT1G76880																	AT5G18200										AT1G20490	AT4G34240
		AT1G33240	AT5G64740	AT1G76890																	AT5G20480										AT5G56150	AT4G12780
		AT1G33250	AT2G44578	AT1G76900																	AT3G05700										AT1G07670	AT1G27385
		AT1G33270	AT4G13395	AT1G08990																	AT3G42660										AT1G47720	AT3G09050
		AT1G33330	AT1G32920	AT1G76940																	AT1G77290										AT1G33120	AT3G05850
		AT1G33420	AT2G45940	AT1G76950																	AT2G21185										AT1G51650	AT2G01060
		AT1G33710	AT5G01870	AT1G76954																	AT2G30500										AT1G18980	AT3G55830
		AT1G33980	AT2G42530	AT1G76980																	AT1G01180										AT5G62570	AT4G24420
		AT1G33990	AT1G64980	AT1G76990																	AT4G28290										AT4G26000	AT4G31200
		AT1G34000	AT2G37580	AT1G76994																	AT4G21745										AT1G10240	AT2G23760
		AT1G34220	AT4G15765	AT1G77000																	AT5G04780										AT2G17680	AT1G09250
		AT1G34245	AT4G29690	AT1G77060																	AT5G64680										AT5G15025	AT1G50200
		AT1G34340	AT3G62860	AT1G77080																	AT4G19110										AT5G20490	AT1G50280
		AT1G34630	AT4G19420	AT1G77093																	AT1G30110										AT3G55390	AT2G44420
		AT1G34670	AT5G47240	AT1G77140																	AT5G18620										AT3G45100	AT5G14280
		AT1G35140	AT3G50800	AT1G09020																	AT5G25220										AT3G13445	AT5G06110
		AT1G35430	AT5G62020	AT1G77180																	AT1G80170										AT1G15910	AT5G09880
		AT1G35460	AT3G48350	AT1G77220																	AT5G22730										AT1G19110	AT3G11745
		AT1G35467	AT3G56400	AT1G77270																	AT4G31290										AT3G04350	AT1G58525
		AT1G35510	AT5G41120	AT1G77280																	AT5G44210										AT2G45740	AT1G14320
		AT1G35516	AT3G08040	AT1G77290																	AT5G42000										AT1G76920	AT1G12710
		AT1G35660	AT3G50930	AT1G77300																	AT4G31670										AT3G08943	AT1G61280
		AT1G35710	AT1G75280	AT1G77310																	AT4G37110										AT5G17910	AT5G66850
		AT1G35780	AT1G01600	AT1G77360																	AT3G01130										AT2G25580	AT1G14930
		AT1G36980	AT1G72260	AT1G77420																	AT1G08270										AT3G07310	AT5G15980
		AT1G36990	AT1G78680	AT1G77440																	AT5G50450										AT2G22805	AT5G46060
		AT1G37113	AT1G14120	AT1G77450																	AT5G58470										AT5G19130	AT1G12260
		AT1G37150	AT4G34230	AT1G09040																	AT2G24230										AT4G15410	AT3G15760
		AT1G38131	AT1G69890	AT1G77480																	AT1G18750										ATCG00500	AT4G29070
		AT1G40104	AT5G19230	AT1G01790																	AT2G22970										AT2G45510	AT4G37380
		AT1G42430	AT4G31330	AT1G77500																	AT2G46590										AT5G16040	AT2G41500
		AT1G42440	AT1G66860	AT1G77590																	AT1G77480										AT4G39250	AT5G19000
		AT1G42960	AT3G49120	AT1G77600																	AT1G03430										AT1G73990	AT3G02950
		AT1G42990	AT3G27820	AT1G77610																	AT5G57710										AT3G04480	AT5G51670
		AT1G43850	AT5G55050	AT1G77630																	AT2G46160										AT5G14920	AT1G01560
		AT1G43890	AT4G21650	AT1G77640																	AT1G61667										AT1G31812	AT3G50500
		AT1G44170	AT1G24100	AT1G77660																	AT3G21690										AT1G32210	AT1G68530
		AT1G44180	AT5G07690	AT1G77670																	AT3G53800										AT2G28910	AT5G55320
		AT1G44575	AT1G54570	AT1G77682																	AT5G55960										AT3G15354	AT5G50740
		AT1G44740	AT4G18950	AT1G77690																	AT4G29520										AT5G06100	AT4G19360
		AT1G44760	AT5G51190	AT1G77700																	AT3G62430										AT4G17760	AT3G27560
		AT1G44895	AT3G53980	AT1G77720																	AT5G52280										AT4G39460	AT1G72760
		AT1G45130	AT1G36370	AT1G77740																	AT1G78020										AT2G23445	AT2G31240
		AT1G45163	AT5G67300	AT1G77750																	AT5G01650										AT5G02760	AT5G18940
		AT1G45170	AT3G05880	AT1G77760																	AT1G10910										AT5G59420	AT3G04080
		AT1G45230	AT4G37260	AT1G77765																	AT1G24265										AT2G42150	AT4G24770
		AT1G46696	AT2G25450	AT1G77780																	AT3G15620										AT1G68120	AT4G32175
		AT1G47128	AT5G13750	AT1G77800																	AT2G40510										AT5G22791	AT1G13940
		AT1G47130	AT5G16190	AT1G77840																	AT1G19710										AT4G23650	AT5G57567
		AT1G47220	AT5G47230	AT1G77850																	AT1G28050										AT5G48470	AT1G02190
		AT1G47230	AT1G62660	AT1G09070																	AT3G01430										AT5G16990	AT1G14100
		AT1G47240	AT5G08790	AT1G77855																	AT3G01475										AT4G24700	AT5G42700
		AT1G47310	AT5G17490	AT1G77880																	AT5G62460										AT1G52810	AT3G13790
		AT1G47317	AT2G46770	AT1G77885																	AT5G01350										AT1G07780	AT4G11211
		AT1G47330	AT5G24290	AT1G77910																	AT3G63070										AT5G51810	AT3G04060
		AT1G47490	AT5G22570	AT1G77920																	AT4G34215										AT1G77400	AT1G60710
		AT1G47497	AT4G13410	AT1G77960																	AT3G24530										AT5G66430	AT1G80950
		AT1G47530	AT4G37150	AT1G77980																	AT2G29210										AT5G04510	AT4G14910
		AT1G47610	AT1G73500	AT1G78000																	AT2G38270										AT2G30250	AT5G06680
		AT1G47720	AT5G53590	AT1G78010																	AT1G21600										AT5G52530	AT1G61170
		AT1G47740	AT5G53588	AT1G78020																	AT3G10530										AT4G01200	AT5G02620
		AT1G47870	AT5G52320	AT1G78030																	AT1G53830										AT2G27110	AT1G15780
		AT1G47970	AT2G22770	AT1G78040																	AT5G64810										AT2G34640	AT4G15640
		AT1G47990	AT4G39320	AT1G78050																	AT4G31590										AT1G56460	AT1G80060
		AT1G48100	AT5G46540	AT1G78060																	AT3G03460										AT2G44260	AT3G13620
		AT1G48120	AT1G06000	AT1G78070																	AT4G25030										AT1G16520	AT1G70510
		AT1G48270	AT3G17820	AT1G78080																	AT5G10470										AT2G32520	AT1G08845
		AT1G48280	AT4G39955	AT1G78090																	AT3G12180										AT1G60970	AT2G21380
		AT1G48325	AT2G39050	AT1G78100																	AT2G45720										AT4G00860	AT1G72050
		AT1G48330	AT4G30270	AT1G78110																	AT4G17330										AT1G55160	AT4G35560
		AT1G48410	AT1G65860	AT1G78130																	AT5G62610										AT2G26150	AT1G20100
		AT1G48420	AT1G70090	AT1G78150																	AT4G16710										AT1G35660	AT5G53430
		AT1G48440	AT2G12480	AT1G78160																	AT3G45060										AT1G16640	AT2G19210
		AT1G48460	AT1G60270	AT1G78170																	AT3G14770										AT4G23890	AT2G21210
		AT1G48480	AT2G29440	AT1G78172																	AT5G58450										AT2G18980	AT4G33740
		AT1G48520	AT2G48010	AT1G78200																	AT5G61440										AT5G63440	AT1G44900
		AT1G48550	AT2G47440	AT1G09140																	AT3G14450										AT4G35050	AT5G65350
		AT1G48635	AT3G30380	AT1G78210																	AT3G05230										AT4G03965	AT3G46590
		AT1G48750	AT1G20160	AT1G78230																	AT4G22630										AT3G59780	AT5G47400
		AT1G48850	AT1G69480	AT1G78240																	AT5G15800										AT1G05783	AT2G18350
		AT1G48880	AT2G41480	AT1G78260																	AT3G22520										AT3G06720	AT5G11550
		AT1G48953	AT4G01070	AT1G78280																	AT5G18610										AT1G52640	AT4G26710
		AT1G49010	AT3G25180	AT1G78290																	AT2G25890										AT1G51630	AT2G05786
		AT1G49130	AT5G63980	AT1G78300																	AT2G41750										AT1G55152	AT3G07960
		AT1G49150	AT5G52390	AT1G78310																	AT5G38200										AT4G24750	AT4G23570
		AT1G49160	AT5G61600	AT1G78380																	AT4G32930										AT1G02690	AT1G15170
		AT1G49170	AT5G66200	AT1G09150																	AT1G25450										AT5G58680	AT5G03570
		AT1G49225	AT1G80840	AT1G78400																	AT5G49300										AT5G66190	AT2G38410
		AT1G49240	AT2G37180	AT1G78410																	AT5G65170										AT3G56840	AT5G55020
		AT1G49245	AT1G12240	AT1G01800																	AT5G01260										AT1G14860	AT4G04770
		AT1G49380	AT5G54710	AT1G78420																	AT4G31930										AT1G27330	AT1G10050
		AT1G49410	AT3G50970	AT1G09155																	AT5G16540										AT2G33800	AT4G20060
		AT1G49420	AT4G24570	AT1G78440																	AT2G44470										AT5G46840	AT5G57140
		AT1G49450	AT1G75960	AT1G78450																	AT4G37235										AT1G21320	AT1G04140
		AT1G49480	AT4G16730	AT1G78460																	AT3G05625										AT3G48880	AT4G09830
		AT1G49510	AT4G11280	AT1G78476																	AT5G59050										AT2G46300	AT5G06450
		AT1G49560	AT1G64970	AT1G78490																	AT5G20500										AT3G61690	AT2G41520
		AT1G49600	AT4G18440	AT1G78510																	AT5G44260										AT2G31350	AT5G27360
		AT1G49610	AT2G18550	AT1G78570																	AT4G35850										AT4G17960	AT2G24280
		AT1G49620	AT3G62720	AT1G78580																	AT3G19570										AT3G05365	AT3G54940
		AT1G49660	AT4G02130	AT1G78590																	AT3G12840										AT1G08910	AT3G06250
		AT1G49700	AT1G72416	AT1G78610																	AT1G78290										AT2G06990	AT3G23660
		AT1G49710	AT2G22240	AT1G78620																	AT3G12955										AT1G49010	AT3G49530
		AT1G49720	AT4G24275	AT1G78630																	AT5G18590										AT3G62740	AT1G51450
		AT1G49740	AT5G07460	AT1G78650																	AT2G44930										AT5G40190	AT1G24510
		AT1G49750	AT4G31500	AT1G78670																	AT5G35180										AT3G54363	AT3G10820
		AT1G49780	AT4G00150	AT1G78700																	AT3G01860										AT3G02660	AT1G48490
		AT1G49810	AT2G38470	AT1G78730																	AT5G53110										AT1G05575	AT1G12663
		AT1G49840	AT2G45760	AT1G78770																	AT5G66600										AT3G53180	AT2G26640
		AT1G49850	AT4G30460	AT1G78790																	AT5G41315										AT4G16430	AT3G61740
		AT1G49880	AT5G54380	AT1G78810																	AT1G70420										AT5G05570	AT1G01580
		AT1G49890	AT2G34490	AT1G78820																	AT4G12450										AT1G54180	AT3G57830
		AT1G49910	AT3G49110	AT1G78830																	AT1G07920										AT5G15853	AT4G14615
		AT1G50010	AT2G28120	AT1G78840																	AT5G13170										AT3G14150	AT4G03205
		AT1G50020	AT1G76650	AT1G09176																	AT2G45530										AT5G45750	AT1G11545
		AT1G50040	AT5G11740	AT1G78850																	AT3G56630										AT2G18040	AT2G18915
		AT1G50140	AT1G70390	AT1G78870																	AT5G01030										AT5G06010	AT1G67550
		AT1G50325	AT4G30520	AT1G78890																	AT1G55350										AT2G03220	AT1G71860
		AT1G50340	AT5G52760	AT1G78900																	AT4G18810										AT5G04040	AT1G74400
		AT1G50360	AT3G52370	AT1G78930																	AT5G38810										AT3G57680	AT5G24320
		AT1G50420	AT5G67480	AT1G78950																	AT1G07420										AT5G53900	AT5G15260
		AT1G50450	AT5G62220	AT1G78955																	AT1G04260										AT1G61790	AT1G76370
		AT1G50480	AT2G45680	AT1G78960																	AT5G67100										AT2G23820	AT1G80190
		AT1G50600	AT3G46620	AT1G78970																	AT5G53160										AT4G09984	AT5G47380
		AT1G50640	AT1G70830	AT1G78990																	AT3G55330										AT3G57340	AT5G59170
		AT1G50650	AT5G06860	AT1G78995																	AT2G37600										AT4G19660	AT3G12203
		AT1G50660	AT2G39770	AT1G09200																	AT1G62981										AT5G05380	AT1G01030
		AT1G50830	AT5G58770	AT1G79010																	AT1G69550										AT1G12100	AT2G12400
		AT1G51130	AT4G17490	AT1G79050																	AT5G19930										AT1G68300	AT2G30840
		AT1G51140	AT1G29330	AT1G79060																	AT5G57500										AT2G44550	AT1G29700
		AT1G51160	AT4G10060	AT1G79070																	AT5G61530										AT1G68780	AT3G62440
		AT1G51230	AT1G51700	AT1G79090																	AT1G23220										AT5G09910	AT1G05790
		AT1G51310	AT4G15490	AT1G79103																	AT3G05220										AT5G24380	AT2G15440
		AT1G51320	AT1G32900	AT1G79110																	AT3G57060										AT5G66180	AT3G04630
		AT1G51330	AT1G43650	AT1G79120																	AT1G49620										AT3G01280	AT2G29890
		AT1G51400	AT5G40260	AT1G09210																	AT3G49620										AT1G30650	AT3G48700
		AT1G51460	AT2G28780	AT1G79150																	AT5G15460										AT1G62190	AT1G01310
		AT1G51500	AT3G50270	AT1G79170																	AT3G27010										AT5G37550	AT3G14890
		AT1G51510	AT5G66040	AT1G79180																	AT4G22666										AT1G73880	AT5G24879
		AT1G51550	AT5G06320	AT1G01820																	AT5G15600										AT3G14720	AT4G34710
		AT1G51570	AT3G44560	AT1G79250																	AT4G29140										AT1G07170	AT1G03360
		AT1G51630	AT3G52180	AT1G79260																	AT3G02110										AT1G10360	AT4G36600
		AT1G51640	AT5G41740	AT1G79270																	AT4G38210										AT1G64610	AT3G54740
		AT1G51650	AT1G24735	AT1G79280																	AT1G12120										AT2G43800	AT4G11260
		AT1G51660	AT3G28345	AT1G09230																	AT4G14720										AT5G51600	AT3G28170
		AT1G51690	AT5G50160	AT1G79340																	AT3G06680										AT5G45275	AT3G12510
		AT1G51700	AT3G57510	AT1G79350																	AT5G14150										AT4G37030	AT5G55390
		AT1G51745	AT4G01060	AT1G79360																	AT4G33430										AT4G39990	AT1G10850
		AT1G51940	AT1G70260	AT1G79370																	AT3G10470										AT1G16030	AT4G27690
		AT1G51950	AT1G10410	AT1G79380																	AT5G40370										AT4G14320	AT5G52400
		AT1G52080	AT1G19630	AT1G79410																	AT3G62580										AT3G23620	AT3G16490
		AT1G52180	AT1G72920	AT1G79420																	AT5G64340										AT2G35520	AT3G16920
		AT1G52190	AT3G09910	AT1G09245																	AT5G53220										AT3G63320	AT5G05360
		AT1G52245	AT1G80110	AT1G79440																	AT5G15360										AT5G47070	AT4G01540
		AT1G52290	AT5G53890	AT1G09250																	AT1G31910										AT5G62930	AT1G78630
		AT1G52300	AT2G20340	AT1G79485																	AT2G47640										AT5G15650	AT1G04010
		AT1G52540	AT4G01950	AT1G79510																	AT2G47010										AT1G62390	AT5G21160
		AT1G52550	AT4G05100	AT1G79520																	AT2G47900										AT1G06515	AT1G54730
		AT1G52565	AT1G72910	AT1G79540																	AT4G28630										AT2G19910	AT1G29860
		AT1G52570	AT3G22235	AT1G79550																	AT5G08080										AT5G13810	AT1G34420
		AT1G52618	AT5G18290	AT1G79570																	AT3G50350										AT3G54800	AT4G19670
		AT1G52620	AT1G07050	AT1G79590																	AT4G02430										AT1G43850	AT2G29910
		AT1G52640	AT2G28900	AT1G79610																	AT4G02590										AT4G15430	AT3G45960
		AT1G52670	AT2G46400	AT1G79620																	AT2G30350										AT5G47590	AT3G63310
		AT1G52730	AT5G23810	AT1G79630																	AT1G24000										AT3G53650	AT5G51960
		AT1G52760	AT3G46600	AT1G79640																	AT5G47500										AT3G03405	AT4G36180
		AT1G52770	AT1G69520	AT1G79650																	AT3G18690										AT5G41560	AT5G51620
		AT1G52810	AT4G01430	AT1G79690																	AT4G18660										AT2G36640	AT2G27460
		AT1G52855	AT5G54940	AT1G79700																	AT3G12670										AT2G45770	AT3G53540
		AT1G52870	AT3G22231	AT1G79710																	AT3G10880										AT3G09340	AT2G39375
		AT1G52880	AT4G22570	AT1G79720																	AT2G36310										AT4G22880	AT1G49400
		AT1G52890	AT3G56275	AT1G79730																	AT5G51795										AT4G38600	AT4G02010
		AT1G52900	AT1G69880	AT1G79760																	AT5G02480										AT3G55490	AT4G26840
		AT1G52980	AT1G75040	AT1G79830																	AT3G20660										AT1G18370	AT1G10820
		AT1G53090	AT2G23130	AT1G09300																	AT2G20190										AT1G24040	AT4G34419
		AT1G53200	AT3G19350	AT1G79840																	AT5G09210										AT5G50850	ATMG00710
		AT1G53210	AT4G11320	AT1G79850																	AT5G54250										AT4G33700	AT5G42940
		AT1G53230	AT1G69260	AT1G79870																	AT5G64850										AT3G11880	AT5G23470
		AT1G53240	AT3G21190	AT1G79880																	AT1G62305										AT3G51410	AT1G74470
		AT1G53250	AT3G17860	AT1G79910																	AT4G22560										AT2G26515	AT5G13580
		AT1G53282	AT5G54170	AT1G79920																	AT5G65650										AT1G73710	AT2G35670
		AT1G53290	AT1G13280	AT1G79940																	AT4G00430										AT5G52430	AT1G73730
		AT1G53310	AT2G15620	AT1G01830																	AT3G51180										AT3G17680	AT5G16200
		AT1G53320	AT5G13800	AT1G79950																	AT1G68350										AT2G20100	AT1G53190
		AT1G53360	AT1G35140	AT1G79970																	AT5G20270										ATCG00650	AT2G26830
		AT1G53380	AT5G44390	AT1G79985																	AT1G05660										AT1G16700	AT1G02405
		AT1G53400	AT3G15790	AT1G80000																	AT5G05780										AT5G45680	AT5G43300
		AT1G53430	AT1G72180	AT1G80010																	AT4G00893										AT5G42770	AT3G27410
		AT1G53470	AT4G31800	AT1G80030																	AT1G27840										AT4G11270	AT5G49430
		AT1G53500	AT3G57450	AT1G80040																	AT1G09230										AT5G55680	AT1G04910
		AT1G53510	AT3G06035	AT1G80060																	AT5G23280										AT2G32090	AT1G34760
		AT1G53580	AT2G20142	AT1G09330																	AT3G06490										AT1G21925	AT3G60010
		AT1G53650	AT1G49640	AT1G80080																	AT3G26690										AT2G46080	AT3G46560
		AT1G53670	AT1G65060	AT1G80100																	AT3G01300										AT5G17640	AT5G55770
		AT1G53690	AT3G25760	AT1G80120																	AT1G73250										AT3G27250	AT4G39130
		AT1G53710	AT4G39950	AT1G80140																	AT5G38560										AT2G30720	AT4G25450
		AT1G53730	AT1G53580	AT1G80170																	AT5G04270										AT4G10330	AT4G25500
		AT1G53770	AT1G63010	AT1G80190																	AT2G37050										AT5G03610	AT1G70860
		AT1G53790	AT4G08869	AT1G80210																	AT3G13110										AT5G41360	AT3G21465
		AT1G53830	AT5G67150	AT1G80230																	AT3G22170										AT3G50360	AT1G04970
		AT1G53920	AT5G60142	AT1G80240																	AT1G49840										AT4G20707	AT2G39180
		AT1G54030	AT1G61100	AT1G80245																	AT2G41250										AT3G20555	AT1G18190
		AT1G54050	AT1G31173	AT1G09340																	AT5G67411										AT3G06550	AT3G56410
		AT1G54080	AT3G61190	AT1G80280																	AT5G26970										AT1G05087	AT4G17550
		AT1G54090	AT3G13520	AT1G80290																	AT2G22640										AT1G31330	AT1G68130
		AT1G54110	AT3G55980	AT1G80300																	AT3G08590										AT1G64590	AT3G12430
		AT1G54115	AT2G14750	AT1G80315																	AT5G02460										AT5G48980	AT3G19450
		AT1G54130	AT5G10946	AT1G80330																	AT4G25480										AT1G23310	AT1G06840
		AT1G54140	AT4G01440	AT1G80340																	AT4G01130										AT3G26744	AT2G43270
		AT1G54170	AT1G55260	AT1G80360																	AT2G20020										AT2G41997	AT1G80100
		AT1G54180	AT3G43720	AT1G80380																	AT5G60910										AT2G04235	AT5G50380
		AT1G54200	AT1G77520	AT1G80400																	AT5G26960										AT4G33630	AT3G47630
		AT1G54210	AT3G11580	AT1G80410																	AT4G36230										AT5G09250	AT5G66010
		AT1G54230	AT5G47960	AT1G80420																	AT1G78580										AT2G36885	AT3G19050
		AT1G54240	AT4G16160	AT1G80450																	AT2G01500										AT5G46900	AT4G02260
		AT1G54250	AT3G46650	AT1G80460																	AT3G01220										AT3G08600	AT2G20770
		AT1G54260	AT5G58400	AT1G80480																	AT1G15700										AT3G30200	AT1G16610
		AT1G54290	AT1G12090	AT1G01840																	AT1G76990										AT5G56960	AT2G31300
		AT1G54310	AT3G50120	AT1G80490																	AT1G80030										AT1G21640	AT1G04300
		AT1G54340	AT1G02850	AT1G80500																	AT4G30850										AT1G08960	AT1G18950
		AT1G54360	AT5G66080	AT1G80530																	AT2G38160										AT5G15630	AT2G27170
		AT1G54570	AT5G22430	AT1G80555																	AT3G62695										AT3G51520	AT2G32930
		AT1G54580	AT5G66816	AT1G80610																	AT5G51730										AT1G68360	AT3G02860
		AT1G54630	AT5G05960	AT1G80630																	AT2G26500										AT1G70140	AT3G54760
		AT1G54690	AT1G10070	AT1G80640																	AT5G10745										AT3G16630	AT5G04238
		AT1G54740	AT2G42660	AT1G80670																	AT2G12405										AT5G50090	AT1G56190
		AT1G54850	AT5G21105	AT1G80700																	AT1G21980										AT3G11830	AT4G37720
		AT1G54990	AT5G59580	AT1G80720																	AT2G46870										AT2G04880	AT3G63260
		AT1G55050	AT2G21590	AT1G80730																	AT2G45180										AT3G04440	AT1G05910
		AT1G55120	AT2G26440	AT1G80740																	AT3G60540										AT2G42740	AT3G23920
		AT1G55152	AT3G63050	AT1G80745																	AT3G60320										AT5G10695	AT4G08180
		AT1G55160	AT5G52570	AT1G80790																	AT3G15500										AT3G26085	AT1G69650
		AT1G55190	AT4G27652	AT1G80830																	AT3G03940										AT5G64460	AT5G61950
		AT1G55200	AT4G23010	AT1G80840																	AT5G08690										AT4G19880	AT1G51060
		AT1G55210	AT3G23250	AT1G80850																	AT3G55220										AT3G57410	AT5G66790
		AT1G55265	AT1G72120	AT1G80865																	AT4G28540										AT3G55480	AT4G14120
		AT1G55340	AT5G47910	AT1G80870																	AT3G08505										AT1G64080	AT5G57100
		AT1G55350	AT1G21910	AT1G80910																	AT1G47330										AT3G22560	AT3G02125
		AT1G55360	AT4G12890	AT1G80930																	ATMG01410										AT2G11890	AT5G57565
		AT1G55365	AT3G54810	AT1G80960																	AT1G22600										AT2G36300	AT2G03640
		AT1G55475	AT5G11360	AT1G80950																	AT4G39860										AT3G58490	AT3G61571
		AT1G55500	AT2G45450	AT1G09520																	AT1G04210										AT4G32590	AT2G19830
		AT1G55510	AT3G14200	AT1G09530																	AT1G70290										AT1G56630	AT4G27090
		AT1G55535	AT2G39650	AT1G01900																	AT4G30150										AT4G38440	AT5G20390
		AT1G55540	AT1G56100	AT1G09560																	AT1G76100										AT1G08130	AT1G20180
		AT1G55590	AT5G19720	AT1G09570																	AT2G20290										AT2G22420	AT4G37440
		AT1G55610	AT4G24140	AT1G09575																	AT1G27360										AT5G53270	AT3G61100
		AT1G55620	AT4G04810	AT1G09580																	AT3G16870										AT3G01810	AT4G25610
		AT1G55675	AT1G54030	AT1G09625																	AT2G30080										AT1G63930	ATMG00690
		AT1G55680	AT4G39030	AT1G09630																	AT3G13420										AT1G62380	AT4G25830
		AT1G55700	AT3G51860	AT1G09660																	AT1G72230										AT4G39590	AT4G31580
		AT1G55770	AT1G50630	AT1G09700																	AT5G41920										AT2G03150	AT3G18790
		AT1G55830	AT1G72510	AT1G09710																	AT1G35780										AT2G28605	AT2G42080
		AT1G55960	AT5G45340	AT1G09780																	AT2G45970										AT4G25720	AT1G55335
		AT1G56020	AT5G03360	AT1G09800																	AT2G38920										AT1G06710	AT2G30160
		AT1G56030	AT4G02280	AT1G09810																	AT4G30935										AT3G03810	AT5G40200
		AT1G56045	AT1G10020	AT1G09840																	AT4G14900										AT2G28860	AT4G12690
		AT1G56070	AT5G59310	AT1G09890																	AT5G14290										AT3G27050	AT1G18870
		AT1G56120	AT5G47220	AT1G09930																	AT5G18280										AT5G51990	AT5G22410
		AT1G56145	AT5G67180	AT1G09940																	AT3G05670										AT3G29200	AT5G13190
		AT1G56170	AT3G60420	AT1G09950																	AT1G69150										AT1G30300	AT3G05775
		AT1G56180	AT5G60890	AT1G01940																	AT5G09460										AT5G41800	AT1G08645
		AT1G56210	AT2G03505	AT1G09970																	AT5G58740										AT1G79660	AT1G01590
		AT1G56220	AT3G28180	AT1G09980																	AT1G13250										AT1G14300	AT1G02067
		AT1G56225	AT2G44830	AT1G10010																	ATMG00010										AT1G71130	AT3G50260
		AT1G56230	AT1G45201	AT1G10020																	AT5G51560										AT5G04790	AT5G25160
		AT1G56233	AT4G09750	AT1G10030																	AT3G03650										AT5G47635	AT2G41180
		AT1G56240	AT1G25400	AT1G10050																	AT4G19710										AT4G32080	AT5G04830
		AT1G56250	AT5G37980	AT1G10060																	AT4G36740										AT5G48640	AT2G31005
		AT1G56260	AT2G23010	AT1G10090																	AT5G66830										AT3G04760	AT5G65070
		AT1G56310	AT1G47610	AT1G10095																	AT2G46920										AT4G24880	AT2G21550
		AT1G56320	AT3G12500	AT1G10120																	AT3G59960										AT3G61940	AT5G11990
		AT1G56350	AT2G32140	AT1G10140																	AT5G61280										AT2G02780	AT5G61100
		AT1G56423	AT2G42540	AT1G01050																	AT5G05800										AT1G32610	AT2G37910
		AT1G56430	AT3G25290	AT1G10155																	AT3G24480										AT2G43930	AT2G20920
		AT1G56450	AT5G61660	AT1G10170																	AT4G30310										AT1G23190	AT2G01130
		AT1G56460	AT3G20390	AT1G10180																	AT2G31190										AT5G27760	AT2G03310
		AT1G56570	AT3G23810	AT1G10210																	AT4G33990										AT3G55800	AT2G40935
		AT1G56590	AT2G40140	AT1G10220																	AT5G43695										AT5G42270	AT2G20560
		AT1G56600	AT3G11700	AT1G10230																	AT4G31540										AT4G18800	AT3G26210
		AT1G56630	AT5G41750	AT1G10250																	AT1G64230										AT2G32970	ATCG00340
		AT1G56700	AT4G08170	AT1G10290																	AT5G12250										AT1G31020	AT4G15233
		AT1G56720	AT1G70370	AT1G01970																	AT3G26700										AT1G24577	AT1G80960
		AT1G57600	AT4G03926	AT1G10370																	AT4G22730										AT3G09500	AT5G64510
		AT1G57680	AT1G12320	AT1G10410																	AT2G25900										AT2G44540	AT5G19480
		AT1G57760	AT3G06070	AT1G10417																	AT5G11000										AT3G27020	AT1G51720
		AT1G57765	AT3G15820	AT1G01990																	AT4G35240										AT5G57015	AT4G07960
		AT1G57860	AT1G28480	AT1G10430																	AT3G22270										AT1G21270	AT5G57510
		AT1G58070	AT5G16240	AT1G10470																	AT1G06530										AT4G17990	AT3G26000
		AT1G58080	AT3G30340	AT1G10522																	AT1G78810										AT1G05570	AT3G07540
		AT1G58110	AT3G16570	AT1G10550																	AT1G78830										AT5G22050	AT1G02860
		AT1G58180	AT2G30870	AT1G10650																	AT5G48480										AT2G34730	AT1G10870
		AT1G58210	AT1G08440	AT1G10657																	AT5G64250										AT5G58160	AT2G36680
		AT1G58235	AT1G78570	AT1G10670																	AT4G36810										AT5G09580	AT5G02230
		AT1G58250	AT3G54030	AT1G10690																	AT1G55610										AT3G44555	AT2G25560
		AT1G58470	AT1G01070	AT1G10700																	AT3G52730										AT3G54540	AT4G27630
		AT1G59640	AT5G15960	AT1G10710																	AT1G44170										AT5G26790	AT1G08990
		AT1G59860	AT4G27720	AT1G02030																	AT3G58200										AT5G42440	AT2G37410
		AT1G59870	AT1G70690	AT1G10740																	AT3G03990										AT4G32910	AT4G01450
		AT1G60000	AT1G29395	AT1G10760																	AT3G24542										AT3G13500	AT5G57940
		AT1G60010	AT1G16400	AT1G10820																	AT1G71880										AT5G24575	AT3G19970
		AT1G60030	AT5G14700	AT1G10840																	AT3G11780										AT4G24210	AT4G01690
		AT1G60070	AT1G73600	AT1G10850																	AT5G01740										AT1G07902	AT4G19960
		AT1G60090	AT3G07360	AT1G10870																	AT5G03380										AT1G10865	AT4G30010
		AT1G60140	AT1G75220	AT1G02060																	AT4G02770										AT1G48750	AT2G41930
		AT1G60160	AT5G63970	AT1G10910																	AT1G22160										AT2G47485	AT3G62300
		AT1G60390	AT5G49360	AT1G10950																	AT1G51950										AT1G65960	AT3G58130
		AT1G60430	AT3G56880	AT1G02067																	AT2G31400										AT1G11910	AT1G69410
		AT1G60530	AT5G59290	AT1G02065																	AT3G53520										AT5G56860	AT1G31150
		AT1G60560	AT5G20900	AT1G11000																	AT1G13860										AT5G64160	AT5G58910
		AT1G60590	AT1G67720	AT1G11050																	AT2G44750										AT1G30050	AT1G65590
		AT1G60600	AT2G27500	AT1G02070																	AT5G57060										AT2G30800	AT5G42690
		AT1G60670	AT2G32290	AT1G11090																	AT4G21926										AT3G61930	AT1G53760
		AT1G60770	AT4G29020	AT1G11100																	AT4G27980										AT1G19540	AT2G39340
		AT1G60800	AT3G12520	AT1G11110																	AT3G02120										AT5G03270	AT2G46290
		AT1G60810	AT1G50040	AT1G11112																	AT5G18820										AT3G21175	AT5G67520
		AT1G60860	AT2G17280	AT1G11120																	AT2G39705										AT5G64060	AT4G14805
		AT1G60870	AT5G58000	AT1G11130																	AT3G51710										AT2G28870	AT1G42480
		AT1G60890	AT2G30550	AT1G02080																	AT4G10820										AT2G43386	AT1G68450
		AT1G60900	AT5G05365	AT1G11160																	AT4G30130										AT3G63180	AT2G43320
		AT1G60940	AT1G73602	AT1G11180																	AT2G20725										AT3G04800	AT4G14380
		AT1G60950	AT1G55265	AT1G11230																	AT5G58100										AT4G19045	AT1G06690
		AT1G60970	AT5G61810	AT1G11250																	AT1G77765										AT5G42240	AT2G26430
		AT1G60987	AT3G16510	AT1G01070																	AT5G67470										AT5G62290	AT2G26340
		AT1G61100	AT1G08500	AT1G11260																	AT4G16660										AT5G52950	AT3G56720
		AT1G61110	AT4G21630	AT1G11280																	AT4G22360										AT4G28730	AT4G10360
		AT1G61140	AT5G15310	AT1G11320																	AT5G20710										AT5G48205	AT2G29940
		AT1G61190	AT5G01075	AT1G11330																	AT3G25400										AT5G40540	AT4G16760
		AT1G61215	AT3G46130	AT1G11380																	AT5G65700										AT1G31870	AT4G18980
		AT1G61255	AT2G35470	AT1G11390																	AT5G65870										AT3G59940	AT3G01930
		AT1G61270	AT5G38710	AT1G11420																	AT1G18560										AT1G01210	AT3G61540
		AT1G61330	AT1G23710	AT1G11430																	AT5G01880										AT1G77770	AT1G22730
		AT1G61350	AT1G19770	AT1G11545																	AT5G67460										AT5G58020	AT1G19270
		AT1G61540	AT3G25770	AT1G11572																	AT3G25720										AT3G15490	AT4G39920
		AT1G61560	AT3G48580	AT1G02100																	AT1G12520										AT4G37685	AT1G20200
		AT1G61620	AT1G04430	AT1G11608																	AT1G68830										AT3G54190	AT1G14350
		AT1G61660	AT2G16660	AT1G11610																	AT1G03030										AT1G66850	AT2G45280
		AT1G61667	AT1G30320	AT1G11660																	AT1G04690										AT2G03450	AT5G50330
		AT1G61730	AT5G43760	AT1G02110																	AT1G70990										AT1G06590	AT5G06250
		AT1G61740	AT1G77420	AT1G11700																	AT4G18600										AT5G61410	AT1G75770
		AT1G61780	AT1G04770	AT1G11710																	AT3G22104										AT1G56045	AT5G08600
		AT1G61790	AT1G62810	AT1G11780																	AT1G69570										AT5G16840	AT5G02400
		AT1G61820	AT3G49307	AT1G11820																	AT3G61390										AT5G58840	AT2G27313
		AT1G61890	AT2G38240	AT1G11840																	AT5G65720										AT4G10610	AT2G47850
		AT1G61900	AT1G78490	AT1G11860																	AT5G11070										AT5G39640	AT1G46768
		AT1G61920	AT2G46960	AT1G11890																	AT5G03320										AT5G54660	AT1G79850
		AT1G61930	AT2G47190	AT1G02130																	AT1G63500										AT3G18090	AT5G42360
		AT1G61940	AT3G14870	AT1G11930																	AT2G16600										AT1G21530	AT2G18938
		AT1G61950	AT5G52120	AT1G11940																	AT5G13000										AT2G39450	AT5G17170
		AT1G62050	AT3G28340	AT1G02140																	AT4G40050										AT5G06850	AT1G62570
		AT1G62190	AT4G10390	AT1G11960																	AT1G58210										AT1G14410	AT5G65050
		AT1G62305	AT2G34070	AT1G11970																	AT3G61640										AT5G14940	AT1G18440
		AT1G62310	AT5G19520	AT1G12000																	AT1G72630										AT1G03850	AT1G80245
		AT1G62330	AT1G77640	AT1G12020																	AT4G18710										AT5G16010	AT4G15130
		AT1G62360	AT5G37770	AT1G12070																	AT2G20060										AT1G15430	AT2G46570
		AT1G62370	AT1G78560	AT1G12080																	AT2G45670										AT4G13050	AT2G40000
		AT1G62380	AT2G40435	AT1G02160																	AT5G54500										AT5G57690	AT3G22200
		AT1G62390	AT5G55120	AT1G12110																	AT5G51451										AT5G55350	AT1G12130
		AT1G62421	AT3G19930	AT1G12120																	AT1G15350										AT5G44570	AT5G07440
		AT1G62420	AT3G26450	AT1G12130																	AT5G03280										AT5G04280	AT1G26480
		AT1G62430	AT3G23570	AT1G12150																	AT5G02030										AT1G05560	AT2G33330
		AT1G62450	AT4G29210	AT1G02170																	AT2G40390										AT5G03480	AT4G16150
		AT1G62490	AT3G16150	AT1G02190																	AT5G12860										AT4G21970	AT3G04130
		AT1G62515	AT5G65470	AT1G12230																	AT1G64385										AT4G39760	AT1G10155
		AT1G62620	AT3G54990	AT1G12240																	AT3G07210										AT5G03470	AT5G12010
		AT1G62760	AT4G21850	AT1G12244																	AT5G63870										AT3G63000	AT3G13300
		AT1G62770	AT5G08330	AT1G12260																	AT1G51570										AT1G52300	AT5G44280
		AT1G62830	AT2G47460	AT1G12300																	AT4G12420										AT4G32730	AT1G64090
		AT1G62870	AT5G11790	AT1G12310																	AT1G04680										AT1G05360	AT3G51940
		AT1G62960	AT4G26740	AT1G12320																	AT4G25470										AT5G48560	AT3G21290
		AT1G62970	AT5G16570	AT1G12330																	AT1G69160										AT1G49810	AT5G24430
		AT1G62981	AT1G11840	AT1G12360																	AT5G58240										AT2G18840	AT4G38800
		AT1G62990	AT3G10720	AT1G12380																	AT4G32285										AT4G02710	AT5G03555
		AT1G63010	AT3G16720	AT1G12390																	AT5G10770										AT3G55020	AT1G35580
		AT1G63030	AT2G40480	AT1G12411																	AT5G45350										AT3G22415	AT5G06980
		AT1G63100	AT4G34630	AT1G12420																	AT3G26539										AT4G17690	AT4G30700
		AT1G63120	AT3G24225	AT1G12430																	AT1G06170										AT3G02980	AT1G08410
		AT1G63130	AT1G07750	AT1G12440																	AT1G75240										AT3G15450	AT2G37440
		AT1G63140	AT1G64900	AT1G12460																	AT3G25880										AT4G11290	AT3G61220
		AT1G63170	AT3G25500	AT1G12500																	AT3G06500										AT5G02450	AT5G22850
		AT1G63180	AT2G38170	AT1G12520																	AT2G43430										AT4G18030	AT2G35650
		AT1G63295	AT5G49180	AT1G12560																	AT3G02130										AT5G51920	AT2G36760
		AT1G63390	AT3G27025	AT1G12580																	AT1G80460										AT2G39490	AT1G31120
		AT1G63430	AT2G43290	AT1G12610																	AT1G59640										AT1G11950	AT5G14930
		AT1G63460	AT3G03520	AT1G12615																	AT3G02620										AT1G17530	AT1G22910
		AT1G63490	AT3G55120	AT1G12620																	AT1G19850										AT1G19480	AT1G55280
		AT1G63500	AT2G32990	AT1G12640																	AT2G01460										AT5G61840	AT5G61120
		AT1G63640	AT1G80820	AT1G02220																	AT4G15240										AT3G17430	AT5G19590
		AT1G63670	AT1G60260	AT1G12663																	AT5G12170										AT2G34750	AT1G72560
		AT1G63680	AT5G19110	AT1G12710																	AT1G75380										AT5G08415	AT2G13540
		AT1G63690	AT1G37130	AT1G12740																	AT3G61320										AT5G21020	AT1G06430
		AT1G63700	AT1G66360	AT1G12790																	AT3G48050										AT3G62460	AT3G12690
		AT1G63720	AT5G48180	AT1G12800																	AT1G07090										AT1G79040	AT4G20400
		AT1G63730	AT3G57530	AT1G12805																	AT5G19030										AT1G16340	AT3G26010
		AT1G63820	AT5G46200	AT1G02230																	AT5G61670										AT2G43920	AT2G21190
		AT1G63840	AT5G15950	AT1G12820																	AT4G29220										AT2G44990	AT4G39530
		AT1G63850	AT4G33300	AT1G12830																	AT5G56260										AT3G15351	AT5G56090
		AT1G63855	AT2G44460	AT1G12920																	AT1G77270										AT2G32760	AT5G47160
		AT1G63910	AT1G05620	AT1G12950																	AT3G16200										AT5G50310	AT3G54360
		AT1G63930	AT1G66960	AT1G13030																	AT4G26080										AT3G58640	AT4G38420
		AT1G63950	AT1G64060	AT1G13060																	AT2G19790										AT2G02800	AT5G61980
		AT1G63980	AT5G15948	AT1G13090																	AT3G18940										AT3G03710	AT5G59810
		AT1G64040	AT3G22850	AT1G13110																	AT5G67440										AT3G17830	AT4G20835
		AT1G64050	AT5G62210	AT1G13120																	AT1G03220										AT2G41940	AT3G20490
		AT1G64060	AT5G45960	AT1G13170																	AT4G21215										AT4G26970	AT4G37280
		AT1G64070	AT3G04210	AT1G13210																	AT3G04120										AT3G46830	AT3G01640
		AT1G64080	AT2G21655	AT1G13230																	AT5G46070										AT4G38660	AT4G25780
		AT1G64105	AT3G04000	AT1G13245																	AT3G45010										AT5G02790	AT1G15790
		AT1G64110	AT4G01480	AT1G13250																	AT3G03140										AT3G49420	AT2G40800
		AT1G64150	AT2G38760	AT1G13260																	AT3G10550										AT5G59840	AT1G23110
		AT1G64180	AT2G18050	AT1G13270																	AT1G02880										AT4G38490	AT1G20970
		AT1G64190	AT3G59220	AT1G13280																	AT1G75400										AT3G56920	AT1G54710
		AT1G64200	AT2G33570	AT1G13300																	AT5G13300										AT3G01516	AT2G37950
		AT1G64230	AT1G14880	AT1G13350																	AT3G29130										AT5G01225	AT2G32020
		AT1G64380	AT1G73540	AT1G13360																	AT1G48330										AT1G76710	AT1G43690
		AT1G64385	AT4G02330	AT1G13370																	AT1G12230										AT1G52550	AT4G15810
		AT1G64390	AT1G08200	AT1G13380																	AT4G27660										AT1G54340	AT2G03350
		AT1G64405	AT2G37870	AT1G13390																	AT1G06070										AT1G74460	AT4G25710
		AT1G64450	AT1G20330	AT1G02330																	AT1G77440										AT5G35430	AT1G06360
		AT1G64455	AT2G46600	AT1G13450																	AT2G41140										AT4G36560	AT3G14160
		AT1G64460	AT5G04720	AT1G13470																	AT1G25330										AT5G25080	AT3G59580
		AT1G64490	AT5G05170	AT1G02340																	AT5G22940										AT5G60000	AT4G26100
		AT1G64510	AT1G72900	AT1G13650																	AT5G18403										AT2G29660	AT1G11930
		AT1G64540	AT3G46613	AT1G02350																	AT3G57550										AT2G33120	AT3G01330
		AT1G64570	AT5G04590	AT1G01080																	AT5G26910										AT3G02493	AT5G03340
		AT1G64590	AT5G23940	AT1G13680																	AT5G10630										AT5G20890	AT4G03010
		AT1G64610	AT4G39350	AT1G13730																	AT1G15757										AT1G79390	AT3G48600
		AT1G64620	AT5G25390	AT1G13740																	AT3G50210										AT1G07745	AT4G18040
		AT1G64625	AT1G32910	AT1G02360																	AT3G57740										AT1G10500	AT3G55430
		AT1G64650	AT1G14480	AT1G13860																	AT1G68720										AT1G64625	AT3G10640
		AT1G64660	AT1G63710	AT1G02370																	AT1G04130										AT5G14040	AT1G68330
		AT1G64720	AT1G28610	AT1G13940																	AT4G13000										AT4G39200	AT3G60500
		AT1G64740	AT1G54575	AT1G13950																	AT3G48187										AT5G16810	AT3G53820
		AT1G64795	AT1G54010	AT1G13960																	AT1G79870										AT5G10900	AT2G33210
		AT1G64850	AT1G09932	AT1G13980																	AT1G13730										AT2G43910	AT3G15390
		AT1G64900	AT4G36500	AT1G14020																	AT3G61970										AT5G15750	AT3G60290
		AT1G64970	AT5G54490	AT1G14030																	AT3G07760										AT2G43050	AT5G13020
		AT1G64980	AT1G16850	AT1G14040																	AT3G59890										AT1G80750	AT2G35350
		AT1G65320	AT4G30280	AT1G14100																	AT1G10550										AT5G52440	AT3G60260
		AT1G65350	AT5G63180	AT1G14140																	AT2G31270										AT4G00955	AT4G31600
		AT1G65450	AT5G22250	AT1G02390																	AT3G11560										AT1G77320	AT4G14270
		AT1G65470	AT1G24470	AT1G02400																	AT5G04670										AT2G33175	AT4G33820
		AT1G65690	AT5G46800	AT1G14230																	AT1G53320										AT5G66140	AT2G37980
		AT1G65730	AT5G54720	AT1G01090																	AT5G23480										AT2G28105	AT5G24880
		AT1G65820	AT5G32460	AT1G14260																	AT4G21960										AT1G15740	AT2G22250
		AT1G65840	AT1G14330	AT1G14270																	AT4G28370										AT3G25910	AT3G06630
		AT1G65880	AT3G47540	AT1G14290																	AT3G05840										AT2G36170	AT4G14580
		AT1G65890	AT1G76960	AT1G14310																	AT2G25460										AT5G07830	AT3G22920
		AT1G65930	AT1G35910	AT1G14315																	AT3G11670										AT5G59850	AT3G66658
		AT1G65960	AT5G07110	AT1G14320																	AT3G57330										AT5G50100	AT5G62500
		AT1G65980	AT5G23850	AT1G14330																	AT3G17190										AT4G14420	AT4G13110
		AT1G66120	AT2G47780	AT1G14340																	AT5G13310										AT3G57790	AT3G07920
		AT1G66140	AT1G76600	AT1G14350																	AT5G19150										AT1G62970	AT5G22790
		AT1G66145	AT5G05440	AT1G02405																	AT3G04620										AT4G24550	AT1G07410
		AT1G66150	AT4G12910	AT1G14380																	AT4G35590										AT2G01667	AT4G23500
		AT1G66180	AT5G17090	AT1G02420																	AT5G23630										AT1G68020	AT1G01820
		AT1G66235	AT2G30930	AT1G14430																	AT1G78100										AT1G56700	AT5G10080
		AT1G66250	AT2G29750	AT1G14440																	AT1G09710										AT5G39600	AT4G02050
		AT1G66260	AT5G05270	AT1G14450																	AT5G21080										AT5G14770	AT3G53130
		AT1G66300	AT5G26670	AT1G14510																	AT1G01695										AT5G07350	AT2G01630
		AT1G66330	AT2G37760	AT1G14540																	AT2G37470										AT3G12020	AT1G53040
		AT1G66345	AT1G44790	AT1G14570																	AT1G49710										AT2G18830	AT4G22240
		AT1G66350	AT1G18740	AT1G14590																	AT5G03370										AT1G14490	AT1G49200
		AT1G66380	AT3G45680	AT1G02460																	AT2G42370										AT1G76390	AT5G67140
		AT1G66480	AT1G17840	AT1G14620																	AT1G72320										AT2G25740	AT3G53320
		AT1G66490	AT3G22290	AT1G14650																	AT3G49220										AT1G24650	AT5G09570
		AT1G66500	AT2G17730	AT1G14670																	AT1G76950										AT5G03440	AT1G74530
		AT1G66540	AT5G19100	AT1G14685																	AT1G74030										AT1G04150	AT3G29190
		AT1G66590	AT3G60955	AT1G14690																	AT5G49970										AT1G70190	AT3G07660
		AT1G66600	AT4G09500	AT1G14700																	AT5G45330										AT2G18721	AT4G24830
		AT1G66730	AT4G25620	AT1G14720																	AT5G43290										AT1G10110	AT1G78280
		AT1G66770	AT2G26250	AT1G14730																	AT3G48090										AT5G08300	AT3G62110
		AT1G66820	AT5G40850	AT1G14740																	AT5G20110										AT1G80570	AT3G26600
		AT1G66830	AT1G72290	AT1G14755																	AT2G36050										AT1G11680	AT5G11940
		AT1G66850	AT3G30580	AT1G14770																	AT2G29628										AT1G28300	AT3G49210
		AT1G66890	AT1G74380	AT1G14840																	AT1G79010										AT4G38580	AT3G46630
		AT1G67040	AT3G57070	AT1G01100																	AT2G19930										AT5G23920	AT2G38080
		AT1G67050	AT3G12750	AT1G02470																	AT1G02900										AT4G33410	AT3G12290
		AT1G67080	AT4G33540	AT1G02475																	AT5G13230										AT2G17265	AT1G20810
		AT1G67090	AT4G15200	AT1G14910																	AT3G12830										AT3G61510	AT1G50370
		AT1G67140	AT4G01410	AT1G14920																	AT1G02160										AT1G16910	AT1G04370
		AT1G67230	AT5G40780	AT1G14930																	AT1G05890										AT4G17230	AT4G34170
		AT1G67300	AT5G09440	AT1G14970																	AT5G60710										AT1G02450	AT5G09920
		AT1G67310	AT3G56170	AT1G14980																	AT1G68590										AT1G75370	AT1G65295
		AT1G67320	AT3G15510	AT1G15000																	AT5G01540										AT5G60360	AT1G13060
		AT1G67360	AT4G30450	AT1G15010																	AT5G01830										AT1G32190	AT3G19184
		AT1G67410	AT5G10625	AT1G15020																	AT5G03550										AT4G39580	AT4G33840
		AT1G67440	AT3G60550	AT1G15030																	AT1G77960										AT1G08490	AT2G22450
		AT1G67480	AT2G37460	AT1G15060																	AT3G26490										AT5G24020	AT4G23730
		AT1G67510	AT1G50460	AT1G15100																	AT1G02800										AT1G09430	AT5G01050
		AT1G67560	AT4G22050	AT1G15110																	AT5G03140										AT1G78220	AT4G09150
		AT1G67630	AT3G63160	AT1G15120																	AT1G14910										AT5G58760	AT3G55360
		AT1G67650	AT2G34310	AT1G15130																	AT5G16620										AT1G03250	AT3G51110
		AT1G67680	AT1G24575	AT1G02510																	AT3G14205										AT5G60980	AT2G22010
		AT1G67720	AT5G65920	AT1G15170																	AT2G02000										AT5G59700	AT4G24990
		AT1G67730	AT3G10190	AT1G15215																	AT3G10740										AT5G05740	AT1G29640
		AT1G67740	AT1G28370	AT1G15220																	AT2G43870										AT3G56820	AT3G23740
		AT1G67830	AT1G71692	AT1G15260																	AT1G75640										AT1G34220	AT2G43310
		AT1G67840	AT2G38740	AT1G15320																	AT2G37435										AT5G38670	AT1G60610
		AT1G67850	AT3G50770	AT1G15350																	AT1G70410										AT4G34520	AT5G50480
		AT1G67880	AT3G50440	AT1G15360																	AT1G75170										AT4G28450	AT3G54770
		AT1G67930	AT5G24160	AT1G15390																	AT4G39080										AT2G25280	AT3G61620
		AT1G67960	AT1G10010	AT1G15400																	AT1G79920										AT1G13440	AT2G46340
		AT1G68020	AT5G13930	AT1G15420																	AT2G47150										AT1G50360	AT3G14910
		AT1G68030	AT2G43520	AT1G15490																	AT3G60250										AT2G20490	AT2G22370
		AT1G68050	AT5G59730	AT1G15500																	AT1G22620										AT3G23600	AT3G05240
		AT1G68060	AT3G17600	AT1G15530																	AT5G55070										AT1G50660	AT5G40380
		AT1G68070	AT1G70270	AT1G15550																	AT4G27940										AT3G58700	AT3G18773
		AT1G68120	AT1G67300	AT1G15570																	AT1G77093										AT1G49910	AT5G28288
		AT1G68140	AT1G14390	AT1G02560																	AT1G07550										AT5G49550	AT4G38905
		AT1G68160	AT1G57775	AT1G15660																	AT3G11850										AT5G54180	AT1G16445
		AT1G68180	AT1G52827	AT1G15670																	AT1G10417										AT1G29550	AT4G28990
		AT1G68190	AT1G70130	AT1G15680																	AT3G01120										AT4G26450	AT5G14160
		AT1G68200	AT1G49450	AT1G15690																	AT3G06080										AT1G73840	AT5G61940
		AT1G68220	AT2G46100	AT1G15700																	AT5G61780										AT2G47000	AT5G19450
		AT1G68290	AT1G10560	AT1G15710																	AT4G40010										AT1G54290	AT1G01420
		AT1G68300	AT5G52750	AT1G15720																	AT1G76940										AT3G56250	AT2G02170
		AT1G68310	AT5G61270	AT1G15730																	AT2G44430										AT4G29240	AT1G48590
		AT1G68340	AT5G26660	AT1G15757																	AT5G19390										AT2G42955	AT4G00340
		AT1G68350	AT1G27940	AT1G15780																	AT3G13330										AT4G23780	AT5G57580
		AT1G68360	AT2G24600	AT1G15790																	AT1G75180										AT1G26540	AT3G10090
		AT1G68400	AT1G29720	AT1G15800																	AT2G39480										AT3G24093	AT1G60130
		AT1G68410	AT2G35950	AT1G15860																	AT1G80610										AT3G04854	AT5G07900
		AT1G68440	AT5G57670	AT1G15920																	AT1G53690										AT1G55500	AT4G27130
		AT1G68470	AT5G57785	AT1G15930																	AT1G27540										AT2G36100	AT3G18380
		AT1G68480	AT3G05490	AT1G15950																	AT5G15150										AT5G63990	AT3G05810
		AT1G68490	AT1G52342	AT1G15960																	AT2G34480										AT1G08400	AT1G11572
		AT1G68500	AT1G72940	AT1G15980																	AT5G59400										AT3G62040	AT3G53780
		AT1G68540	AT3G47510	AT1G16020																	AT4G01660										AT4G04200	AT1G28410
		AT1G68550	AT5G34882	AT1G01110																	AT5G16500										AT3G08950	AT2G44150
		AT1G68560	AT4G29570	AT1G16060																	AT1G06660										AT2G36720	AT2G48090
		AT1G68570	AT2G05540	AT1G02590																	AT1G73350										AT3G27027	AT5G49290
		AT1G68580	AT1G70840	AT1G02610																	AT5G42880										AT1G23280	AT3G50650
		AT1G68590	AT3G27660	AT1G16180																	AT5G62180										AT3G48140	AT1G14020
		AT1G68610	AT5G23970	AT1G16270																	AT1G75530										AT2G18600	AT5G04840
		AT1G68620	AT2G38610	AT1G02620																	AT2G28950										AT1G03760	AT1G01050
		AT1G68670	AT5G60300	AT1G16330																	AT3G49870										AT5G56590	AT4G19870
		AT1G68690	AT4G13263	AT1G16420																	AT4G08930										AT3G26570	AT2G36026
		AT1G68710	AT1G47450	AT1G16445																	AT1G79590										AT4G20470	AT4G16190
		AT1G68720	AT2G01300	AT1G16490																	AT3G50880										AT1G14280	AT2G43445
		AT1G68780	AT1G71140	AT1G16500																	AT5G67500										AT5G13240	AT4G27610
		AT1G68790	AT5G14360	AT1G16510																	AT2G01600										AT5G46850	AT4G10200
		AT1G68795	AT1G21400	AT1G16515																	AT3G07380										AT1G10390	AT5G18230
		AT1G68800	AT3G60530	AT1G02640																	AT1G04750										AT4G08150	AT2G39000
		AT1G68820	AT1G47470	AT1G01120																	AT1G03180										AT1G16800	AT3G58450
		AT1G68830	AT2G30860	AT1G16610																	AT1G74800										AT3G27420	AT1G01355
		AT1G68945	AT5G15970	AT1G16630																	AT4G36780										AT5G08050	AT2G02950
		AT1G68990	AT5G62165	AT1G02660																	AT1G02510										AT3G62680	AT1G71820
		AT1G69030	AT5G37660	AT1G16710																	AT5G03330										AT3G12800	AT5G17550
		AT1G69040	AT4G30470	AT1G16730																	AT1G51460										AT3G56010	AT5G18030
		AT1G69070	AT5G60450	AT1G16750																	AT2G17890										AT4G32260	AT5G66350
		AT1G69085	AT5G58350	AT1G16770																	AT5G18460										AT1G62960	AT3G20640
		AT1G69120	AT5G34885	AT1G16790																	AT1G05700										AT1G76910	AT5G07240
		AT1G69150	AT3G19660	AT1G16825																	AT3G07580										AT5G05200	AT3G61415
		AT1G69160	AT5G59305	AT1G02670																	AT4G25200										AT5G60040	AT5G08470
		AT1G69170	AT1G17360	AT1G16850																	AT1G13270										AT4G09647	AT3G59820
		AT1G69190	AT5G27150	AT1G16860																	AT5G13730										AT3G12620	AT1G02370
		AT1G69250	AT2G23610	AT1G16870																	AT5G10190										AT4G38280	AT5G15210
		AT1G69260	AT1G45211	AT1G16880																	AT2G44180										AT5G22020	AT4G27240
		AT1G69270	AT4G04840	AT1G16916																	AT2G40940										AT2G45290	AT1G66740
		AT1G69295	AT3G03341	AT1G17050																	AT3G55570										AT2G28920	AT2G48150
		AT1G69310	AT5G57910	AT1G17060																	AT1G16630										AT1G12530	AT4G20930
		AT1G69320	AT1G70580	AT1G17065																	AT3G50920										AT5G62790	AT3G17510
		AT1G69340	AT3G16340	AT1G17080																	AT4G34139										AT5G14540	AT1G58350
		AT1G69360	AT3G48650	AT1G17100																	AT3G02750										AT5G03510	AT5G59340
		AT1G69370	AT4G14130	AT1G17145																	AT1G65840										AT5G47800	AT1G34120
		AT1G69400	AT5G05590	AT1G17147																	AT3G55520										AT3G12650	AT2G27180
		AT1G69420	AT1G72240	AT1G17180																	AT4G39210										AT1G20690	AT1G49920
		AT1G69430	AT5G04340	AT1G17190																	AT5G24930										AT1G03110	AT5G37810
		AT1G69450	AT2G28305	AT1G17235																	AT1G62370										AT4G17430	AT5G17810
		AT1G69510	AT2G45930	AT1G02720																	AT3G25882										AT1G03200	AT3G14350
		AT1G69526	AT1G66370	AT1G17285																	AT1G77450										AT4G35260	AT1G27950
		AT1G69530	AT4G22130	AT1G17290																	AT4G23470										AT5G14490	AT2G47570
		AT1G69540	AT2G34820	AT1G17330																	AT3G56380										AT3G48010	AT1G18500
		AT1G69550	AT3G19370	AT1G17350																	AT3G52500										AT3G10290	AT1G06150
		AT1G69560	AT2G13770	AT1G17360																	AT1G70360										AT2G26030	AT1G30825
		AT1G69570	AT4G21990	AT1G17380																	AT4G28240										AT2G27030	AT1G18773
		AT1G69580	AT3G09870	AT1G17440																	AT1G60010										AT4G08230	AT2G16365
		AT1G69588	AT2G32030	AT1G17455																	AT1G74060										AT3G05770	AT4G14746
		AT1G69600	AT5G39320	AT1G17500																	AT5G37300										AT3G16210	AT2G17620
		AT1G69610	AT5G43510	AT1G02740																	AT1G14670										AT3G17180	AT3G02060
		AT1G69640	AT1G69790	AT1G17560																	AT5G24010										AT1G16170	AT5G67490
		AT1G69700	AT4G15800	AT1G17580																	AT4G31270										AT4G24390	AT4G33200
		AT1G69740	AT5G12890	AT1G01130																	AT1G27220										AT2G48030	AT3G04690
		AT1G69750	AT2G39851	AT1G02780																	AT4G33940										AT5G62920	AT3G01600
		AT1G69760	AT4G19970	AT1G17720																	AT2G36910										AT3G48250	AT3G11600
		AT1G69770	AT5G57050	AT1G17744																	AT3G27960										AT1G33980	AT5G36950
		AT1G69780	AT5G26000	AT1G02790																	AT5G65330										AT5G09300	AT2G41230
		AT1G69790	AT2G35840	AT1G17830																	AT5G51830										AT2G46735	AT1G61470
		AT1G69840	AT1G59700	AT1G17840																	AT3G60340										AT3G01910	AT1G64170
		AT1G69850	AT1G77885	AT1G17890																	AT1G77000										AT5G12200	AT1G04240
		AT1G69860	AT2G27080	AT1G02800																	AT3G10160										AT1G07990	AT3G47550
		AT1G69870	AT5G18270	AT1G17940																	AT1G77220										AT2G07775	AT5G01380
		AT1G69900	AT3G15950	AT1G17970																	AT1G03475										AT3G20980	AT1G68650
		AT1G69920	AT4G14030	AT1G02816																	AT1G33420										AT3G60480	AT2G39360
		AT1G69940	AT3G30383	AT1G18070																	ATMG00110										AT2G22900	AT1G12244
		AT1G69970	AT1G51940	AT1G18080																	AT5G63130										AT5G65840	AT1G18620
		AT1G69980	AT1G20990	AT1G18130																	AT4G00730										AT2G30942	AT3G10570
		AT1G70000	AT3G14810	AT1G18140																	AT1G78730										AT2G44600	AT1G75630
		AT1G70020	AT1G74430	AT1G18150																	AT5G01970										AT3G44290	AT5G18760
		AT1G70060	AT2G22470	AT1G18160																	AT2G36570										AT5G08590	AT1G17285
		AT1G70090	AT2G43018	AT1G02830																	AT5G01420										AT2G39690	AT2G17540
		AT1G70140	AT2G43020	AT1G18190																	AT3G62090										AT5G65520	AT1G13120
		AT1G70150	AT3G27880	AT1G18200																	AT4G39970										AT4G08300	AT5G59160
		AT1G70180	AT5G02170	AT1G18210																	AT1G53310										AT5G02490	AT1G73610
		AT1G70190	AT1G60190	AT1G18300																	AT2G40120										AT5G46874	AT5G57380
		AT1G70200	AT3G24420	AT1G18330																	AT1G10950										AT3G18370	AT5G64520
		AT1G70220	AT1G05200	AT1G18335																	AT4G20320										AT4G26900	AT4G38910
		AT1G70250	AT1G74090	AT1G18390																	AT3G07900										AT3G08580	AT3G07610
		AT1G70260	AT4G18360	AT1G18400																	AT4G23620										AT4G29670	AT3G55840
		AT1G70280	AT5G17760	AT1G18440																	AT5G04490										AT2G43600	AT3G07990
		AT1G70290	AT5G06390	AT1G02860																	AT3G05937										AT5G63170	AT4G39890
		AT1G70300	AT1G33800	AT1G18460																	AT5G10960										AT1G77710	AT1G29430
		AT1G70310	AT5G09870	AT1G18470																	AT4G21903										AT5G52260	AT4G36970
		AT1G70360	AT3G10930	AT1G18480																	AT3G14210										AT1G53710	AT1G29950
		AT1G70370	AT5G24760	AT1G18500																	AT3G23400										AT5G47100	AT3G13062
		AT1G70380	AT5G20190	AT1G18560																	AT1G06200										AT4G32280	AT1G71090
		AT1G70400	AT4G17250	AT1G18610																	AT5G05987										AT1G75410	AT2G18110
		AT1G70410	AT3G19553	AT1G18620																	AT1G65470										AT1G30900	AT1G79720
		AT1G70420	AT2G32130	AT1G02880																	AT3G14730										AT3G47080	AT3G45820
		AT1G70430	AT1G03710	AT1G18700																	AT3G23980										AT5G27140	AT4G19120
		AT1G70490	AT5G67060	AT1G18710																	AT1G31880										AT2G17980	AT1G75090
		AT1G70505	AT5G42955	AT1G18720																	AT4G39730										AT3G24660	AT2G15980
		AT1G70540	AT1G68470	AT1G18730																	AT4G35510										AT3G55470	AT5G42970
		AT1G70550	AT1G01120	AT1G18740																	AT2G01270										AT3G16000	AT5G62800
		AT1G70570	AT4G11653	AT1G18750																	AT5G01200										AT1G62830	ATMG00720
		AT1G70610	AT1G75050	AT1G18773																	AT1G73630										AT2G20790	AT2G19480
		AT1G70660	AT3G28270	AT1G18800																	AT1G78410										AT1G79930	AT3G07930
		AT1G70690	AT1G48280	AT1G18810																	AT3G55450										AT5G19430	AT2G47430
		AT1G70700	AT3G19010	AT1G18830																	AT5G47430										AT5G42580	AT5G56210
		AT1G70710	AT4G27870	AT1G18850																	AT5G56750										AT1G49150	AT1G27520
		AT1G70720	AT5G54390	AT1G18860																	AT3G09670										AT1G76320	AT5G63110
		AT1G70730	AT5G28020	AT1G18870																	AT4G32690										AT3G54160	AT5G50340
		AT1G70740	AT2G22330	AT1G02890																	AT1G79090										AT2G42700	AT1G07480
		AT1G70750	AT4G39800	AT1G18890																	AT4G39870										AT5G57570	AT5G49230
		AT1G70780	AT5G25980	AT1G18900																	AT2G47070										AT2G05520	AT4G12230
		AT1G70790	AT2G31570	AT1G02900																	AT1G13390										AT5G25510	AT3G62880
		AT1G70870	AT5G42957	AT1G18940																	AT4G32020										AT5G19070	AT5G55220
		AT1G70900	AT5G23860	AT1G18950																	AT5G53400										AT5G42410	AT3G48290
		AT1G70910	AT4G37050	AT1G18970																	AT4G33170										AT5G24810	AT3G59880
		AT1G70940	AT1G72280	AT1G18990																	ATCG00120										AT2G18170	AT2G27810
		AT1G70950	AT3G24360	AT1G19000																	AT1G13470										AT3G16220	AT1G19830
		AT1G70980	AT4G29930	AT1G19010																	AT4G36790										AT3G15090	AT1G35160
		AT1G70985	AT1G04220	AT1G19050																	AT5G10150										AT4G36170	AT4G34910
		AT1G70990	AT1G62180	AT1G02910																	AT1G05380										AT3G61990	AT1G48320
		AT1G71000	AT5G34887	AT1G02920																	AT3G12640										AT5G64970	AT5G25760
		AT1G71010	AT5G41550	AT1G19100																	AT4G25280										AT3G20500	AT3G61700
		AT1G71040	AT3G24510	AT1G19140																	AT3G55740										AT5G62090	AT3G58850
		AT1G71050	AT4G36990	AT1G19180																	AT5G25270										AT1G25260	AT4G14920
		AT1G71060	AT3G51240	AT1G19210																	AT1G22540										AT3G57250	AT3G20260
		AT1G71070	AT4G36988	AT1G19220																	AT3G02450										AT1G73940	AT2G23140
		AT1G71080	AT4G33550	AT1G19230																	AT1G01720										AT5G56970	AT5G01390
		AT1G71100	AT5G41400	AT1G19270																	AT2G40540										AT4G19680	AT5G02540
		AT1G71110	AT1G57680	AT1G19300																	AT1G04480										AT5G09320	AT5G19910
		AT1G71130	AT1G80760	AT1G19330																	AT5G55040										AT4G00305	AT1G78950
		AT1G71310	AT5G01500	AT1G19340																	AT5G10410										AT3G62870	AT3G11591
		AT1G71350	AT5G65040	AT1G19350																	AT2G33840										AT5G45540	AT1G62790
		AT1G71440	AT3G21670	AT1G19370																	AT3G49010										AT2G03530	AT2G22180
		AT1G71490	AT5G15740	AT1G19380																	AT2G01930										AT5G46230	AT5G24710
		AT1G71520	AT4G20820	AT1G02960																	AT3G05900										AT5G23405	AT4G03410
		AT1G71530	AT1G67950	AT1G19450																	AT3G54880										AT5G62300	AT5G61070
		AT1G71692	AT2G01180	AT1G19460																	AT1G17350										AT3G54290	AT2G41360
		AT1G71695	AT1G68620	AT1G19485																	AT3G03770										AT1G71865	AT2G38870
		AT1G71697	AT2G30490	AT1G19500																	AT1G50420										AT5G15860	AT3G16360
		AT1G71720	AT5G28030	AT1G01140																	AT4G30370										AT1G15750	AT3G22120
		AT1G71730	AT3G05460	AT1G19650																	AT5G47210										AT1G05785	AT1G71235
		AT1G71770	AT2G13610	AT1G19660																	AT2G22490										AT3G12360	AT5G08540
		AT1G71780	AT4G30340	AT1G19670																	AT1G71960										AT1G76860	AT3G02360
		AT1G71830	AT5G51870	AT1G19700																	AT2G25800										AT1G28080	AT1G54610
		AT1G71850	AT1G75300	AT1G19710																	AT5G15200										AT2G27980	AT4G11720
		AT1G71865	AT4G32212	AT1G01150																	AT2G27130										AT5G13850	AT2G24680
		AT1G71870	AT1G02816	AT1G19830																	AT1G19500										AT4G00460	AT2G26560
		AT1G71880	AT3G62610	AT1G19835																	AT5G67350										AT5G25150	AT4G36270
		AT1G71900	AT3G29810	AT1G19840																	AT1G12800										AT2G02660	AT3G13560
		AT1G71920	AT1G19960	AT1G03000																	AT2G02470										AT4G25020	AT1G20830
		AT1G71960	AT4G16146	AT1G19850																	AT1G54690										AT3G61140	AT2G34315
		AT1G71970	AT3G44550	AT1G19870																	AT2G26730										AT5G41390	AT1G70600
		AT1G71980	AT5G55850	AT1G19910																	AT5G53450										AT2G07667	AT5G01470
		AT1G72020	AT4G31550	AT1G19930																	AT5G56280										AT4G16265	AT1G18335
		AT1G72040	AT3G30387	AT1G19970																	AT5G08740										AT4G29680	AT3G05520
		AT1G72090	AT3G30385	AT1G20010																	AT5G37270										AT5G48655	AT1G25270
		AT1G72100	AT3G19030	AT1G20030																	AT3G03920										AT2G41060	AT1G70630
		AT1G72141	AT3G50640	AT1G20080																	AT1G53470										AT3G13040	AT1G04105
		AT1G72150	AT4G19030	AT1G20100																	AT1G48635										AT5G44005	AT4G32670
		AT1G72170	AT5G06750	AT1G20140																	AT1G71000										AT4G04210	AT3G56030
		AT1G72175	AT1G45223	AT1G20180																	AT2G46040										AT2G39940	AT5G62650
		AT1G72180	AT3G62820	AT1G20190																	AT3G23050										AT4G30020	AT4G17730
		AT1G72200	AT2G01830	AT1G20200																	AT2G42340										AT4G31410	AT2G21430
		AT1G72210	AT1G20823	AT1G03030																	AT2G25690										AT2G35680	AT3G21080
		AT1G72220	AT1G75680	AT1G20260																	AT1G04050										AT1G68200	AT1G28240
		AT1G72230	AT5G38820	AT1G20330																	AT1G76660										AT1G01460	AT4G27180
		AT1G72250	AT4G25810	AT1G20340																	AT5G46190										AT1G55700	AT1G69470
		AT1G72275	AT1G09500	AT1G20380																	AT5G14950										AT5G67310	AT1G65010
		AT1G72280	AT5G43513	AT1G03040																	AT4G27490										AT3G04855	AT1G02030
		AT1G72310	AT1G14130	AT1G03050																	AT5G18937										AT2G16270	AT4G39745
		AT1G72320	AT3G07390	AT1G20410																	AT1G15220										AT2G18750	AT5G60964
		AT1G72410	AT1G09560	AT1G20440																	AT1G77910										AT4G27540	AT4G22475
		AT1G72420	AT5G43516	AT1G20450																	AT1G47130										AT5G54690	AT2G25480
		AT1G72450	AT3G11990	AT1G20570																	AT4G11350										AT5G24820	AT3G51620
		AT1G72460	AT1G73010	AT1G20610																	AT3G63220										AT4G36530	AT1G79280
		AT1G72470	AT5G42050	AT1G20620																	AT4G16520										AT3G49890	AT3G23080
		AT1G72480	AT1G17990	AT1G20650																	AT3G22160										AT2G25210	AT4G34920
		AT1G72500	AT1G18020	AT1G20670																	AT5G63800										AT4G30480	AT5G48970
		AT1G72510	AT3G01185	AT1G20693																	AT3G16480										AT5G56650	AT4G25110
		AT1G72520	AT5G53420	AT1G20750																	AT1G68480										AT5G26622	AT5G18540
		AT1G72620	AT1G51500	AT1G20770																	AT5G12340										AT3G62130	AT5G16550
		AT1G72630	AT1G18350	AT1G20810																	AT2G46320										AT1G25112	AT3G13898
		AT1G72640	AT4G22690	AT1G20830																	AT3G01770										AT1G70910	AT2G31880
		AT1G72650	AT1G14360	AT1G20840																	AT5G13100										AT1G18600	AT1G63830
		AT1G72680	AT2G45400	AT1G20875																	AT3G11165										AT3G15130	AT1G56010
		AT1G72690	AT1G61810	AT1G03060																	AT3G56160										AT3G19760	AT1G12150
		AT1G72700	AT1G06475	AT1G20970																	AT3G50630										AT3G24670	AT4G16447
		AT1G72740	AT5G55720	AT1G20980																	AT5G01710										AT3G02150	AT5G23550
		AT1G72770	AT3G23090	AT1G20990																	AT3G60630										AT1G72650	AT4G27300
		AT1G72810	AT4G11510	AT1G21000																	AT4G22250										AT5G44170	AT3G01015
		AT1G72820	AT5G43518	AT1G21010																	AT5G16160										AT5G58230	AT2G33530
		AT1G72830	AT5G16290	AT1G03080																	AT1G80740										AT2G42450	AT1G27880
		AT1G72860	AT2G19990	AT1G21080																	AT4G22790										AT1G25490	AT1G26720
		AT1G72910	AT5G27520	AT1G03090																	AT3G09230										ATCG01310	AT5G37850
		AT1G72920	AT4G19430	AT1G21200																	AT1G11940										AT5G62810	AT3G26720
		AT1G72940	AT3G24535	AT1G21250																	AT5G24310										AT3G42150	AT2G45850
		AT1G72950	AT3G46890	AT1G21380																	AT4G31490										AT5G51180	AT2G40200
		AT1G72960	AT5G57790	AT1G03106																	AT4G34960										AT5G57800	AT1G04555
		AT1G72990	AT3G03640	AT1G21395																	AT5G66810										AT5G15480	AT2G26930
		AT1G73000	AT3G61820	AT1G21410																	AT5G41620										AT1G17090	AT2G38995
		AT1G73010	AT1G21440	AT1G21440																	AT1G01100										AT5G07270	AT4G32390
		AT1G73030	AT1G56385	AT1G21450																	AT1G55620										AT4G22000	AT4G35270
		AT1G73060	AT5G43525	AT1G21460																	AT4G21980										AT3G02730	AT1G67160
		AT1G73066	AT1G73210	AT1G21470																	AT1G03740										AT3G02810	AT2G46800
		AT1G73090	AT1G50325	AT1G03120																	AT2G25710										AT5G38650	AT3G16565
		AT1G73100	AT1G56580	AT1G21480																	AT2G35710										AT3G46010	AT1G31290
		AT1G73120	AT1G63090	AT1G21540																	AT1G54240										AT1G26230	AT3G60640
		AT1G73170	AT3G61890	AT1G21580																	AT1G60590										AT1G20900	AT3G02330
		AT1G73210	AT2G21750	AT1G21600																	AT1G72310										AT1G67960	AT2G44740
		AT1G73220	AT4G33960	AT1G21660																	AT4G39830										AT3G43610	AT2G32295
		AT1G73240	AT1G17430	AT1G21670																	AT1G17720										AT5G39610	AT1G20693
		AT1G73250	AT3G62010	AT1G01180																	AT3G62830										AT5G19950	AT2G26190
		AT1G73350	AT3G05030	AT1G21730																	AT2G46060										AT3G57670	AT2G17845
		AT1G73360	AT4G01895	AT1G21738																	AT3G07880										AT5G37474	AT5G40940
		AT1G73370	AT5G07770	AT1G21790																	AT5G01910										AT1G62620	AT2G26600
		AT1G73390	AT1G73040	AT1G21810																	AT1G75820										AT3G21165	AT2G41670
		AT1G73400	AT5G63590	AT1G21830																	AT3G03470										AT3G55720	AT3G14090
		AT1G73440	AT5G50335	AT1G21835																	AT2G28080										AT3G12070	AT5G02180
		AT1G73480	AT1G74890	AT1G21900																	AT5G08180										AT3G49820	AT3G08940
		AT1G73490	AT2G34500	AT1G21910																	AT5G03970										AT1G72860	AT1G12360
		AT1G73500	AT5G34881	AT1G21920																	AT3G02600										AT1G56430	AT3G10810
		AT1G73510	AT1G52880	AT1G03180																	AT1G07210										AT1G60160	AT1G09340
		AT1G73540	AT4G22710	AT1G21980																	AT2G17560										AT2G36854	AT5G07600
		AT1G73570	AT2G42580	AT1G21990																	AT1G15120										AT5G58600	AT2G40475
		AT1G73580	AT2G28085	AT1G22030																	AT3G57880										AT1G14800	AT2G39890
		AT1G73590	AT3G46970	AT1G22040																	AT3G11590										AT2G46490	AT1G67750
		AT1G73630	AT2G29710	AT1G22050																	AT5G11230										AT4G38120	AT2G22980
		AT1G73660	AT5G58320	AT1G22060																	AT5G05830										AT3G44380	AT1G30440
		AT1G73670	AT1G60680	AT1G22070																	AT4G36890										AT2G25260	AT2G38720
		AT1G73680	AT3G10370	AT1G22110																	AT5G12400										AT4G19600	AT5G35995
		AT1G73690	AT3G03828	AT1G03190																	AT4G36730										AT5G53850	AT1G09176
		AT1G73710	AT1G25340	AT1G22150																	AT1G47497										AT1G12930	AT1G54820
		AT1G73720	AT4G28550	AT1G22160																	AT5G59440										AT1G32810	AT3G10910
		AT1G73740	AT1G70380	AT1G22180																	AT1G18900										AT3G26110	AT3G62100
		AT1G73760	AT4G26690	AT1G22190																	AT5G43020										AT4G21430	AT4G19530
		AT1G73770	AT2G04080	AT1G22200																	AT4G36040										AT5G56700	AT4G15380
		AT1G73805	AT5G44400	AT1G03220																	AT1G03600										AT3G10560	AT4G04340
		AT1G73820	AT1G52760	AT1G22275																	AT4G37850										AT1G10270	AT3G59470
		AT1G73830	AT3G47590	AT1G22280																	AT2G41430										AT5G01400	AT4G34890
		AT1G73840	AT2G05440	AT1G22310																	AT5G06280										AT5G23350	AT5G02130
		AT1G73850	AT1G45215	AT1G22330																	AT3G17090										AT3G60910	AT5G62850
		AT1G73860	AT5G22970	AT1G22370																	AT1G69070										AT4G10320	AT4G37360
		AT1G73875	AT1G73607	AT1G22380																	AT4G26540										AT5G16830	AT3G51360
		AT1G73880	AT2G43510	AT1G22400																	AT2G33310										AT5G56610	AT1G48370
		AT1G73940	AT1G26610	AT1G22410																	AT5G65300										AT4G02465	AT1G72610
		AT1G73950	AT2G16750	AT1G22480																	AT5G10020										AT5G38600	AT4G17830
		AT1G73960	AT5G43440	AT1G22540																	AT4G37250										AT4G21790	AT5G18070
		AT1G73990	AT4G02940	AT1G22570																	AT5G66310										AT2G38360	AT2G45800
		AT1G74030	AT2G14378	AT1G03260																	AT5G67070										AT3G50590	AT3G56330
		AT1G74050	AT5G07800	AT1G22600																	AT5G54840										AT2G33550	AT3G48675
		AT1G74060	AT1G78040	AT1G22620																	AT1G07260										AT3G15420	AT4G35295
		AT1G74070	AT3G03480	AT1G22610																	AT1G69360										AT5G62420	AT5G18550
		AT1G74088	AT4G23430	AT1G22640																	AT3G42170										AT4G00231	AT3G06260
		AT1G74100	AT1G03300	AT1G22650																	AT1G72175										AT3G14415	AT2G43140
		AT1G74270	AT4G31380	AT1G22660																	AT2G38450										AT1G14870	AT5G52030
		AT1G74280	AT1G70850	AT1G22730																	AT5G55640										AT1G16680	AT2G32260
		AT1G74300	AT4G08025	AT1G22770																	AT1G60090										AT3G52140	AT5G53800
		AT1G74330	AT5G63380	AT1G22780																	AT1G69320										AT5G24520	AT1G22190
		AT1G74430	AT5G64190	AT1G22830																	AT5G67020										AT2G28050	AT3G46460
		AT1G74450	AT2G31670	AT1G22860																	AT5G19760										AT5G67510	AT1G22950
		AT1G74460	AT4G24220	AT1G22882																	AT5G04440										AT1G75290	AT2G02380
		AT1G74510	AT1G57777	AT1G22910																	AT5G41260										AT1G20550	AT5G16340
		AT1G74560	AT4G33920	AT1G22930																	AT3G14000										AT1G32127	AT3G63060
		AT1G74640	AT1G45221	AT1G22950																	AT3G49790										AT1G03800	AT5G08510
		AT1G74660	AT2G31790	AT1G03310																	AT1G15680										AT2G32280	AT2G46670
		AT1G74670	AT3G02670	AT1G22985																	AT5G17780										AT1G49610	AT1G24330
		AT1G74700	AT5G57010	AT1G22990																	AT5G23870										AT3G26060	AT5G17050
		AT1G74710	AT5G49280	AT1G23000																	AT3G51630										AT5G62820	ATMG00080
		AT1G74720	AT4G39980	AT1G23010																	AT1G68820										AT3G62240	AT4G34410
		AT1G74740	AT3G10890	AT1G23020																	AT5G09890										AT5G52620	AT2G47920
		AT1G74750	AT5G54145	AT1G23030																	AT4G10300										AT5G36710	AT4G23270
		AT1G74780	AT4G20970	AT1G23040																	AT1G74670										AT1G79210	AT3G12140
		AT1G74800	AT1G58170	AT1G23050																	AT1G55190										AT4G25840	AT1G66410
		AT1G74860	AT5G66400	AT1G23070																	AT2G47940										AT5G14800	AT5G01510
		AT1G74920	AT2G04400	AT1G23080																	AT1G75840										AT1G79740	AT1G68040
		AT1G74930	AT1G49715	AT1G23090																	AT5G67385										AT1G24706	AT1G30490
		AT1G74940	AT2G21130	AT1G23100																	AT4G39910										AT4G33510	AT2G46150
		AT1G74970	AT2G22930	AT1G23110																	AT1G29300										AT3G04360	AT2G31260
		AT1G75000	AT5G04370	AT1G23160																	AT1G12830										AT5G47490	AT3G13060
		AT1G75010	AT2G17040	AT1G23210																	AT2G33360										AT1G72480	AT4G34400
		AT1G75020	AT2G27315	AT1G03360																	AT1G32630										AT4G02100	AT1G62260
		AT1G75060	AT5G58670	AT1G23220																	AT5G22740										AT5G16023	AT5G42790
		AT1G75080	ATCG00490	AT1G01190																	AT3G25870										AT5G23040	AT3G58530
		AT1G75100	AT1G70500	AT1G03365																	AT5G66220										AT3G15840	AT4G15025
		AT1G75110	AT4G26940	AT1G23390																	AT3G17980										AT1G45163	AT4G26260
		AT1G75160	AT5G19240	AT1G23550																	AT5G13950										AT3G58820	AT2G47020
		AT1G75170	AT3G16560	AT1G03370																	AT1G17180										AT5G55700	AT5G19870
		AT1G75180	AT5G67160	AT1G23710																	AT1G07885										AT2G41450	AT1G16330
		AT1G75210	AT2G25790	AT1G23810																	AT3G54200										ATMG00540	AT1G19450
		AT1G75220	AT1G53300	AT1G23820																	AT1G58080										AT1G63170	AT2G05620
		AT1G75230	AT1G04990	AT1G23860																	AT5G22090										AT2G03020	AT1G08620
		AT1G75240	AT1G76360	AT1G23870																	AT3G09860										AT4G11680	AT4G00872
		AT1G75250	AT1G76040	AT1G03410																	AT3G59280										AT5G47229	AT3G06120
		AT1G75280	AT5G62470	AT1G23980																	AT3G47160										AT2G33690	AT3G05430
		AT1G75290	AT2G46950	AT1G24000																	AT5G25820										AT4G32210	AT1G25422
		AT1G75300	AT5G07500	AT1G03430																	AT1G33240										AT3G18130	AT5G14500
		AT1G75310	AT4G35310	AT1G03440																	AT1G30280										AT2G38100	AT3G49290
		AT1G75330	AT4G02860	AT1G24070																	AT3G62660										AT3G55460	AT2G19110
		AT1G75350	AT3G06890	AT1G24095																	AT1G09570										AT4G22160	AT1G55900
		AT1G75360	AT1G63460	AT1G24170																	AT2G22475										AT1G06500	AT2G20010
		AT1G75370	AT1G52770	AT1G24180																	AT3G10540										ATMG00260	AT1G22400
		AT1G75380	AT5G07220	AT1G24260																	AT1G61900										AT1G16290	AT3G53950
		AT1G75390	AT1G04580	AT1G24265																	AT1G25580										AT3G47620	AT2G33830
		AT1G75400	AT4G32410	AT1G24267																	AT1G26960										AT3G57980	AT5G18404
		AT1G75410	AT4G05590	AT1G24330																	AT5G09470										AT3G60380	AT3G06140
		AT1G75420	AT4G18960	AT1G03457																	AT1G72950										AT1G47310	AT1G53440
		AT1G75440	AT3G46540	AT1G24440																	AT1G09970										AT5G11130	AT2G15830
		AT1G75450	AT5G05730	AT1G01020																	AT5G23400										AT1G02205	AT5G10435
		AT1G75460	AT3G16390	AT1G03475																	AT3G53460										AT1G65350	AT1G65950
		AT1G75490	AT2G44300	AT1G24510																	AT3G48980										AT1G69750	AT1G10095
		AT1G75500	AT5G07660	AT1G24530																	AT3G49590										AT2G33500	AT1G76760
		AT1G75510	AT5G52060	AT1G24540																	AT1G76060										AT5G63920	AT5G25830
		AT1G75520	AT3G08490	AT1G24570																	AT1G56030										AT1G67730	AT2G19570
		AT1G75530	AT3G19550	AT1G24625																	AT4G22930										AT5G62865	AT3G01060
		AT1G75540	AT1G58460	AT1G03510																	AT5G17305										AT5G41080	AT3G48430
		AT1G75550	AT2G36325	AT1G03530																	AT4G29920										AT3G18770	ATCG00190
[truncated: 6,827 more rows]
