# Supplementary material for: A CRC–MYB-mediated local chromatin loop at the MAB4 locus determines auxin-mediated nectary size in Arabidopsis thaliana
Source: Research Square preprint supplement (doi:10.21203/rs.3.rs-7421252/v1), 2025-09-07
Supplement: Supplementary file 4 [file 206475a5572abf2b62a91181.xlsx]

## Sheet: Sheet1
Supplementary Data 1. Results of CRC-GFP ChIP experiments.
Region	Gene.symbol	Gene.ID	Gene.chrom	Gene.start	Gene.end	Gene.strand	Gene.distance	Gene.section
1_2372_2874	NAC001	AT1G01010	1	3631	5899	+	757	Promoter
1_20923_21123	DCL1	AT1G01040	1	23121	31227	+	1998	1to5kb
1_21258_21633	DCL1	AT1G01040	1	23121	31227	+	1488	1to5kb
1_33336_33677	LHY	AT1G01060	1	33365	37871	-	4194	Intronexonboundary
1_37880_38326	LHY	AT1G01060	1	33365	37871	-	9	Promoter
1_44303_44612	AT1G01080	AT1G01080	1	44970	47059	-	2447	Intergenic
1_44977_45177	AT1G01080	AT1G01080	1	44970	47059	-	1882	3UTR
1_49748_50263	AT1G01100	AT1G01100	1	49909	51210	-	947	Intronexonboundary
1_55281_55745	IQD18	AT1G01110	1	51953	54737	+	3328	Intergenic
1_57054_57643	KCS1	AT1G01120	1	57164	59215	-	1572	3UTR
1_60548_60827	AT1G01130	AT1G01130	1	61905	63811	-	2984	Intergenic
1_61222_61761	AT1G01130	AT1G01130	1	61905	63811	-	2050	Intergenic
1_67649_67848	CIPK9	AT1G01140	1	64166	67774	-	74	Promoter
1_71958_72421	GIF2	AT1G01160	1	72339	74096	+	82	Promoter
1_77588_77883	AT1G01180	AT1G01180	1	75390	76845	+	2198	Intron
1_81794_82034	CYP78A8	AT1G01190	1	82984	84946	-	2912	Intergenic
1_86544_86860	RABA3	AT1G01200	1	86486	88409	-	1549	3UTR
1_88610_88889	AT1G01210	AT1G01210	1	88622	90502	+	12	Promoter
1_91208_91450	FKGP	AT1G01220	1	91342	95681	+	108	Promoter
1_97256_97548	AT1G01230	AT1G01230	1	97412	99240	+	136	Promoter
1_99171_99599	AT1G01230	AT1G01230	1	97412	99240	+	1759	3UTR
1_107468_107893	AT1G01260	AT1G01260	1	108946	111699	+	1053	1to5kb
1_108929_109130	AT1G01260	AT1G01260	1	108946	111699	+	17	Promoter
1_112254_113043	CYP703A2	AT1G01280	1	112263	113947	+	9	Promoter
1_120426_120840	AT1G01320	AT1G01320	1	121067	130577	-	9737	Intergenic
1_128571_129012	AT1G01320	AT1G01320	1	121067	130577	-	1565	Intronexonboundary
1_130397_131396	AT1G01320	AT1G01320	1	121067	130577	-	180	Promoter
1_135932_136190	CNGC10	AT1G01340	1	132270	135924	-	8	Promoter
1_156440_157159	TBL25	AT1G01430	1	156477	158823	-	1664	3UTR
1_158573_159080	TBL25	AT1G01430	1	156477	158823	-	250	Promoter
1_168285_168610	PIPK11	AT1G01460	1	168559	171386	+	51	Promoter
1_173229_173706	LEA14	AT1G01470	1	171525	172948	-	281	Promoter
1_178017_178964	ACS2	AT1G01480	1	175706	178406	+	2311	3UTR
1_179221_179539	AT1G01490	AT1G01490	1	180017	182749	-	3210	Intergenic
1_181900_182734	AT1G01490	AT1G01490	1	180017	182749	-	15	5UTR
1_183109_183736	AT1G01490	AT1G01490	1	180017	182749	-	360	Promoter
1_184080_185324	AT1G01500	AT1G01500	1	185033	187135	+	291	Promoter
1_186880_187373	AN	AT1G01510	1	187145	190472	+	228	Promoter
1_190369_190568	ASG4	AT1G01520	1	190408	192436	+	39	Promoter
1_194282_195876	AT1G01540	AT1G01540	1	195645	198787	+	231	Promoter
1_199392_199836	BPS1	AT1G01550	1	199527	201775	+	135	Promoter
1_204346_204987	AT1G01570	AT1G01570	1	204935	207642	+	52	Promoter
1_205857_206181	AT1G01570	AT1G01570	1	204935	207642	+	922	Intronexonboundary
1_206469_208006	AT1G01570	AT1G01570	1	204935	207642	+	1534	Intronexonboundary
1_219637_220403	CYP86A4	AT1G01600	1	218834	221286	+	803	Intronexonboundary
1_224248_224770	GPAT4	AT1G01610	1	221642	224351	-	103	Promoter
1_225400_226207	PIP1C	AT1G01620	1	225665	227543	-	1336	Intronexonboundary
1_228671_229054	AT1G01630	AT1G01630	1	228799	230979	+	128	Promoter
1_232525_232748	SPPL4	AT1G01650	1	232840	237905	-	5157	Intergenic
1_237679_238181	SPPL4	AT1G01650	1	232840	237905	-	226	Promoter
1_239721_240050	AT1G01660	AT1G01660	1	239841	242703	-	2653	3UTR
1_245916_246269	PUB54	AT1G01680	1	246262	248440	-	2171	3UTR
1_248885_249218	PRD3	AT1G01690	1	249041	252522	+	156	Promoter
1_254258_254824	TRM33	AT1G01695	1	252626	254530	+	1632	Intronexonboundary
1_261499_261880	ROPGEF2	AT1G01700	1	259307	261667	-	168	Promoter
1_262502_262712	AT1G01710	AT1G01710	1	262828	266324	+	116	Promoter
1_266146_266570	AT1G01710	AT1G01710	1	262828	266324	+	3318	3UTR
1_268169_268506	ATAF1	AT1G01720	1	267993	269819	+	176	5UTR
1_274714_275037	BSK4	AT1G01740	1	272111	274930	-	107	Promoter
1_278549_278846	AT1G01760	AT1G01760	1	276266	278599	-	50	Promoter
1_284361_284645	KEA1	AT1G01790	1	284350	291203	+	11	5UTR
1_291153_291481	KEA1	AT1G01790	1	284350	291203	+	6803	Intronexonboundary
1_292861_293578	AT1G01800	AT1G01800	1	293246	295086	+	332	Promoter
1_295024_295386	AT1G01800	AT1G01800	1	293246	295086	+	1778	3UTR
1_297844_298762	AT1G01830	AT1G01830	1	298451	302310	-	3548	3UTR
1_302361_303559	AT1G01840	AT1G01840	1	303537	304358	+	22	Promoter
1_308974_309272	AT1G01880	AT1G01880	1	306467	309541	-	269	Intronexonboundary
1_315699_316302	AT1G01910	AT1G01910	1	313101	316090	-	212	Promoter
1_322814_323033	AT1G01940	AT1G01940	1	322886	324917	+	72	Promoter
1_324885_325351	AT1G01940	AT1G01940	1	322886	324917	+	1999	3UTR
1_337698_338446	AT1G01970	AT1G01970	1	338241	340088	+	205	Promoter
1_342255_342522	AT1G01980	AT1G01980	1	340108	342040	-	215	Promoter
1_344287_344500	AT1G01990	AT1G01990	1	342918	344400	-	100	Promoter
1_345535_345975	GAE2	AT1G02000	1	345516	347603	+	19	5UTR
1_362913_363793	AT1G02060	AT1G02060	1	360918	363142	-	229	Promoter
1_363945_364676	SPL8	AT1G02065	1	365165	367443	+	489	Promoter
1_368156_368423	SPL8	AT1G02065	1	365165	367443	+	2991	Intergenic
1_373234_373585	AT1G02080	AT1G02080	1	373335	386913	+	101	Promoter
1_389560_389902	SBI1	AT1G02100	1	389812	392816	+	90	Promoter
1_395397_395774	VAD1	AT1G02120	1	395689	400001	+	85	Promoter
1_401738_402255	RA-5	AT1G02130	1	399983	401919	-	181	Promoter
1_404407_404694	MAGO	AT1G02140	1	403100	404456	-	49	Promoter
1_408546_408864	ALG12	AT1G02145	1	404600	408619	+	3946	3UTR
1_410555_410867	AT1G02160	AT1G02160	1	410744	411632	+	123	Promoter
1_411367_411883	MC1	AT1G02170	1	411664	413554	+	219	Promoter
1_414594_414984	AT1G02180	AT1G02180	1	413522	414649	-	55	Promoter
1_418138_418365	CER1	AT1G02205	1	418416	422579	+	51	Promoter
1_424699_424999	CER1	AT1G02205	1	418416	422579	+	6283	Intronexonboundary
1_434593_435237	NAC004	AT1G02230	1	434965	436922	-	1685	Intronexonboundary
1_436848_437095	NAC004	AT1G02230	1	434965	436922	-	74	Promoter
1_452717_453366	AT1G02290	AT1G02290	1	450461	452743	-	26	Promoter
1_455564_455799	AT1G02300	AT1G02300	1	453107	455519	+	2457	Intergenic
1_461594_461994	AT1G02320	AT1G02320	1	461828	461974	+	166	Promoter
1_466665_467107	HFR1	AT1G02340	1	465616	467880	-	773	Intronexonboundary
1_467522_468008	HFR1	AT1G02340	1	465616	467880	-	128	Promoter
1_469241_469907	AT1G02350	AT1G02350	1	469818	470693	+	89	Promoter
1_471454_471820	AT1G02360	AT1G02360	1	471883	473336	-	1516	Intergenic
1_472028_472320	AT1G02360	AT1G02360	1	471883	473336	-	1016	3UTR
1_479687_479956	AT1G02380	AT1G02380	1	476945	479112	+	2742	Intergenic
1_483763_484135	GPAT2	AT1G02390	1	480650	483373	+	3113	Intergenic
1_484878_485315	GA2OX6	AT1G02400	1	486800	489651	+	1485	1to5kb
1_485510_485957	GA2OX6	AT1G02400	1	486800	489651	+	843	Promoter
1_487556_488199	GA2OX6	AT1G02400	1	486800	489651	+	756	Intron
1_488406_488846	GA2OX6	AT1G02400	1	486800	489651	+	1606	Intronexonboundary
1_492949_493835	AT1G02410	AT1G02410	1	490860	492979	+	2089	3UTR
1_498878_499096	NIMIN1	AT1G02450	1	497917	498539	-	339	Promoter
1_501517_501720	AT1G02460	AT1G02460	1	504463	507268	-	5548	Intergenic
1_502384_503142	AT1G02460	AT1G02460	1	504463	507268	-	4126	Intergenic
1_508929_509209	AT1G02460	AT1G02460	1	504463	507268	-	1661	1to5kb
1_511106_511492	AT1G02470	AT1G02470	1	511765	513721	-	2229	Intergenic
1_511887_512137	AT1G02470	AT1G02470	1	511765	513721	-	1584	Intronexonboundary
1_513499_514762	AT1G02475	AT1G02475	1	513699	515422	-	660	Intronexonboundary
1_515516_515720	AT1G02475	AT1G02475	1	513699	515422	-	94	Promoter
1_516743_517035	AT1G02490	AT1G02490	1	516569	516866	+	174	3UTR
1_518083_518381	SAM1	AT1G02500	1	518091	520495	+	8	Promoter
1_521677_522044	TPK4	AT1G02510	1	520498	521668	-	9	Promoter
1_537521_537909	CLPP5	AT1G02560	1	537740	540127	+	169	Promoter
1_552666_553039	AT1G02610	AT1G02610	1	553019	556152	-	3113	3UTR
1_553599_554423	AT1G02610	AT1G02610	1	553019	556152	-	1729	Intronexonboundary
1_558682_558966	AT1G02620	AT1G02620	1	557092	558774	+	1590	Intron
1_565309_565658	BXL2	AT1G02640	1	564018	567771	+	1291	Intronexonboundary
1_566661_567496	BXL2	AT1G02640	1	564018	567771	+	2643	Exon
1_571051_571542	AT1G02660	AT1G02660	1	571826	575085	-	3543	Intergenic
1_572006_572252	AT1G02660	AT1G02660	1	571826	575085	-	2833	3UTR
1_580461_580735	AT1G02670	AT1G02670	1	575922	580532	+	4539	3UTR
1_583858_584295	IMPA-6	AT1G02690	1	584134	587327	+	161	Promoter
1_590900_591773	GATL5	AT1G02720	1	591682	594264	+	91	Promoter
1_602207_602572	AT1G02740	AT1G02740	1	599330	602199	-	8	Promoter
1_609259_609509	emb2386	AT1G02780	1	607799	609534	-	25	Intronexonboundary
1_616594_617066	CEL2	AT1G02800	1	613197	616231	-	363	Promoter
1_621071_621514	AT1G02816	AT1G02816	1	621453	623054	+	61	Promoter
1_625586_625862	AT1G02830	AT1G02830	1	625084	625608	-	22	Promoter
1_630085_630530	SR34	AT1G02840	1	626639	629993	+	3446	Intergenic
1_644508_644857	TPK1	AT1G02880	1	642505	644903	-	46	Intronexonboundary
1_653262_653748	RALF1	AT1G02900	1	653604	654457	-	709	3UTR
1_662578_662886	GSTF5	AT1G02940	1	662963	664290	-	1404	Intergenic
1_669672_669933	AT1G02960	AT1G02960	1	666807	669919	-	14	Promoter
1_701125_701560	AT1G03030	AT1G03030	1	701365	703929	+	195	Promoter
1_706314_706808	AT1G03040	AT1G03040	1	703847	706689	-	119	Promoter
1_727196_727729	SPI	AT1G03060	1	712440	727553	-	176	Promoter
1_737830_738250	NET1D	AT1G03080	1	731554	738306	-	56	Intronexonboundary
1_738390_739829	NET1D	AT1G03080	1	731554	738306	-	84	Promoter
1_752050_752325	TRM82	AT1G03110	1	749246	751976	+	2804	Intergenic
1_756183_756521	AT1G03150	AT1G03150	1	756414	758678	+	107	Promoter
1_758055_758379	AT1G03150	AT1G03150	1	756414	758678	+	1641	Intronexonboundary
1_760548_760777	FZL	AT1G03160	1	761261	766194	+	484	Promoter
1_772369_772872	AT1G03180	AT1G03180	1	773358	775362	+	486	Promoter
1_773056_773612	AT1G03180	AT1G03180	1	773358	775362	+	254	Promoter
1_780164_780574	AT1G03200	AT1G03200	1	780519	782946	+	55	Promoter
1_785583_785882	AT1G03220	AT1G03220	1	786832	788722	+	950	Promoter
1_791143_791406	AT1G03230	AT1G03230	1	789820	791689	+	1323	Exon
1_793025_793313	AT1G03250	AT1G03250	1	793315	795403	-	2090	Intergenic
1_813138_813580	ATDUF1	AT1G03300	1	811033	813086	-	52	Promoter
1_826177_826678	AT1G03365	AT1G03365	1	826523	830393	+	155	Promoter
1_849592_849865	AHP5	AT1G03430	1	847793	849621	+	1799	3UTR
1_864174_864529	AT1G03457	AT1G03457	1	860761	864372	-	157	Promoter
1_867679_868558	NET3A	AT1G03470	1	865895	867733	-	54	Promoter
1_868771_869313	LIN2	AT1G03475	1	868853	871308	-	1995	Intronexonboundary
1_871054_871624	NAC006	AT1G03490	1	871874	872906	+	250	Promoter
1_875895_876094	AT1G03510	AT1G03510	1	876087	877556	-	1462	3UTR
1_877603_877944	AT1G03510	AT1G03510	1	876087	877556	-	47	Promoter
1_880058_880344	NAF1	AT1G03530	1	880384	883599	-	3255	Intergenic
1_889803_890225	AT1G03560	AT1G03560	1	890155	892492	-	2267	3UTR
1_892313_892578	AT1G03560	AT1G03560	1	890155	892492	-	86	Promoter
1_896415_898139	PSB27	AT1G03600	1	898480	899794	+	341	Promoter
1_898309_899044	PSB27	AT1G03600	1	898480	899794	+	171	Promoter
1_899512_900011	PSB27	AT1G03600	1	898480	899794	+	1032	3UTR
1_900436_901211	AT1G03610	AT1G03610	1	900732	903070	+	296	Promoter
1_902582_903071	AT1G03610	AT1G03610	1	900732	903070	+	1850	3UTR
1_903274_904300	AT1G03610	AT1G03610	1	900732	903070	+	2542	Intergenic
1_905156_905474	AT1G03620	AT1G03620	1	904032	907643	-	2169	Intronexonboundary
1_906814_907779	AT1G03620	AT1G03620	1	904032	907643	-	136	Promoter
1_918005_918409	THM1	AT1G03680	1	916772	918064	-	59	Promoter
1_929831_930030	AT1G03730	AT1G03730	1	930715	931985	-	1955	Intergenic
1_931582_932395	AT1G03730	AT1G03730	1	930715	931985	-	403	Promoter
1_933455_933799	AT1G03740	AT1G03740	1	933426	937152	+	29	5UTR
1_937542_938038	SWI2	AT1G03750	1	937826	941162	+	212	Promoter
1_943269_943864	AT1G03760	AT1G03760	1	941062	943377	-	108	Promoter
1_944609_944851	RING1B	AT1G03770	1	944572	947682	+	37	5UTR
1_951945_952333	TPX2	AT1G03780	1	947520	951850	-	95	Promoter
1_954162_954375	SOM	AT1G03790	1	954290	956144	+	85	Promoter
1_955807_956174	SOM	AT1G03790	1	954290	956144	+	1517	3UTR
1_957891_958272	ERF10	AT1G03800	1	957104	958383	-	111	5UTR
1_966700_966983	AT1G03830	AT1G03830	1	961684	966790	-	90	Promoter
1_967609_967880	MGP	AT1G03840	1	967470	970334	-	2454	Exon
1_976392_976626	GRXS13	AT1G03850	1	975871	977911	-	1285	Intronexonboundary
1_981802_982182	PHB2	AT1G03860	1	979307	982002	-	180	Promoter
1_984119_984647	FLA9	AT1G03870	1	982381	983544	-	575	Promoter
1_993266_993483	ABCI19	AT1G03905	1	993400	995989	+	83	Promoter
1_1010982_1011314	AT1G03940	AT1G03940	1	1009228	1011145	-	163	Promoter
1_1023816_1024132	AT1G03982	AT1G03982	1	1022251	1023719	-	97	Promoter
1_1028527_1028729	AT1G04000	AT1G04000	1	1027853	1029119	-	390	Exon
1_1028833_1029094	AT1G04000	AT1G04000	1	1027853	1029119	-	25	5UTR
1_1036052_1036463	BARD1	AT1G04020	1	1036493	1040262	+	30	Promoter
1_1049632_1050246	SUVR1	AT1G04050	1	1045598	1049864	-	232	Promoter
1_1051037_1051399	PRP39	AT1G04080	1	1051312	1056827	+	87	Promoter
1_1064354_1064652	ABCC5	AT1G04120	1	1064264	1071080	-	6428	3UTR
1_1070887_1071281	ABCC5	AT1G04120	1	1064264	1071080	-	193	Promoter
1_1072627_1073421	TPR2	AT1G04130	1	1073274	1075568	+	147	Promoter
1_1084519_1084879	AT1G04150	AT1G04150	1	1081024	1084431	-	88	Promoter
1_1085630_1085923	XIB	AT1G04160	1	1086170	1096510	+	247	Promoter
1_1086067_1086437	XIB	AT1G04160	1	1086170	1096510	+	103	Promoter
1_1108754_1109067	TPR3	AT1G04190	1	1106354	1108725	-	29	Promoter
1_1114309_1114517	AT1G04210	AT1G04210	1	1114375	1119739	+	66	Promoter
1_1125258_1125551	AT1G04230	AT1G04230	1	1125515	1128788	+	36	Promoter
1_1139865_1140170	MPI7	AT1G04260	1	1140278	1141564	-	1394	Intergenic
1_1141296_1141587	MPI7	AT1G04260	1	1140278	1141564	-	23	Promoter
1_1143512_1144057	AT1G04280	AT1G04280	1	1143436	1147091	-	3034	Intronexonboundary
1_1154422_1154722	ERS2	AT1G04310	1	1154740	1157813	-	3091	Intergenic
1_1157553_1158028	ERS2	AT1G04310	1	1154740	1157813	-	215	Promoter
1_1158172_1158917	ERS2	AT1G04310	1	1154740	1157813	-	359	Promoter
1_1159130_1159522	ERS2	AT1G04310	1	1154740	1157813	-	1317	1to5kb
1_1164690_1164908	AT1G04350	AT1G04350	1	1164910	1167135	+	2	Promoter
1_1166919_1167267	AT1G04360	AT1G04360	1	1167288	1169034	-	1767	Intergenic
1_1191273_1191755	c-NAD-MDH1	AT1G04410	1	1188995	1191458	-	185	Promoter
1_1202006_1202493	CKL13	AT1G04440	1	1202160	1206009	+	154	Promoter
1_1215747_1216049	AT1G04480	AT1G04480	1	1215925	1217471	+	124	Promoter
1_1226367_1226693	MAC3A	AT1G04510	1	1226483	1230947	+	116	Promoter
1_1232216_1232566	PDLP2	AT1G04520	1	1231452	1234032	+	764	Intronexonboundary
1_1235919_1236718	AT1G04540	AT1G04540	1	1236754	1239199	+	36	Promoter
1_1240133_1240571	IAA12	AT1G04550	1	1240294	1242157	+	161	Promoter
1_1248747_1249308	AT1G04570	AT1G04570	1	1246601	1248876	-	129	Promoter
1_1250985_1251485	AO4	AT1G04580	1	1252005	1257893	-	6408	Intergenic
1_1261278_1261998	AT1G04590	AT1G04590	1	1258556	1261470	-	192	Promoter
1_1280657_1281298	YUC3	AT1G04610	1	1279351	1281618	+	1306	Intronexonboundary
1_1290851_1291442	EMB1687	AT1G04635	1	1291300	1292024	+	142	Promoter
1_1307809_1308107	AT1G04680	AT1G04680	1	1303467	1307973	-	134	Promoter
1_1312823_1313242	KAB1	AT1G04690	1	1313443	1315823	+	201	Promoter
1_1313351_1313642	KAB1	AT1G04690	1	1313443	1315823	+	92	Promoter
1_1320819_1321208	AT1G04700	AT1G04700	1	1316139	1321000	+	4680	3UTR
1_1321720_1321971	PKT4	AT1G04710	1	1321885	1324840	+	86	Promoter
1_1331163_1331583	CTF18	AT1G04730	1	1325099	1331169	-	6	Promoter
1_1333498_1333874	VAMP721	AT1G04750	1	1331466	1333651	-	153	Promoter
1_1337876_1338183	AT1G04770	AT1G04770	1	1336274	1337849	-	27	Promoter
1_1338424_1338922	AT1G04770	AT1G04770	1	1336274	1337849	-	575	Promoter
1_1339119_1339319	AT1G04778	AT1G04778	1	1339588	1340565	+	269	Promoter
1_1343496_1343709	AT1G04780	AT1G04780	1	1340553	1343793	-	84	5UTR
1_1343794_1344337	AT1G04780	AT1G04780	1	1340553	1343793	-	1	Promoter
1_1344739_1345179	AT1G04790	AT1G04790	1	1344989	1348868	+	190	Promoter
1_1349796_1350262	AT1G04810	AT1G04810	1	1350080	1355466	+	182	Promoter
1_1355547_1356163	TUA4	AT1G04820	1	1356084	1358547	-	2384	3UTR
1_1368675_1369113	UBP2	AT1G04860	1	1369036	1373103	-	3990	3UTR
1_1395945_1396184	SPS3F	AT1G04920	1	1391434	1395953	-	8	Promoter
1_1399071_1399380	AT1G04930	AT1G04930	1	1396265	1399122	-	51	Promoter
1_1407434_1408139	TAFII59	AT1G04950	1	1403085	1407531	-	97	Promoter
1_1410946_1411256	AT1G04960	AT1G04960	1	1407772	1410933	-	13	Promoter
1_1418235_1418798	AT1G04990	AT1G04990	1	1418612	1421863	-	3065	Intronexonboundary
1_1422099_1422419	AT1G04990	AT1G04990	1	1418612	1421863	-	236	Promoter
1_1422640_1422960	AT1G04990	AT1G04990	1	1418612	1421863	-	777	Promoter
1_1432585_1433079	EFE	AT1G05010	1	1431177	1433010	-	69	Promoter
1_1456606_1457080	AT1G05070	AT1G05070	1	1457007	1458802	-	1722	3UTR
1_1462135_1462439	AT1G05085	AT1G05085	1	1460988	1461670	+	1147	Exon
1_1462926_1463181	AT1G05087	AT1G05087	1	1463108	1464173	+	73	Promoter
1_1466701_1467016	AT1G05090	AT1G05090	1	1464239	1465875	+	2462	Intergenic
1_1467526_1467933	MAPKKK18	AT1G05100	1	1469541	1470881	+	1608	1to5kb
1_1468827_1469951	MAPKKK18	AT1G05100	1	1469541	1470881	+	410	Promoter
1_1470547_1471621	AT1G05120	AT1G05120	1	1471323	1476289	-	4668	Intronexonboundary
1_1476983_1477754	AT1G05120	AT1G05120	1	1471323	1476289	-	694	Promoter
1_1482349_1482626	AT1G05140	AT1G05140	1	1482546	1484059	+	80	Promoter
1_1494119_1494327	AT1G05170	AT1G05170	1	1490974	1494248	-	79	Promoter
1_1496416_1497090	AXR1	AT1G05180	1	1498114	1501953	-	4863	Intergenic
1_1497870_1498281	AXR1	AT1G05180	1	1498114	1501953	-	3672	3UTR
1_1503607_1504032	emb2394	AT1G05190	1	1502251	1503853	-	179	Promoter
1_1520421_1520682	AT1G05240	AT1G05240	1	1520278	1523023	+	143	5UTR
1_1529676_1529900	RCI3	AT1G05260	1	1529767	1531484	+	91	Promoter
1_1534234_1534581	AT1G05270	AT1G05270	1	1531641	1534767	-	186	5UTR
1_1545170_1545456	ZIP5	AT1G05300	1	1544927	1547849	-	2393	3UTR
1_1545971_1546719	ZIP5	AT1G05300	1	1544927	1547849	-	1130	Intronexonboundary
1_1553402_1553659	AT1G05320	AT1G05320	1	1553568	1557848	+	91	Promoter
1_1559072_1559478	AT1G05340	AT1G05340	1	1558778	1559917	-	439	Intronexonboundary
1_1564046_1564409	AT1G05350	AT1G05350	1	1560678	1564409	-	0	5UTR
1_1564661_1564867	KMS2	AT1G05360	1	1564491	1567508	+	170	5UTR
1_1569515_1570284	AT1G05370	AT1G05370	1	1569147	1572469	-	2185	Intronexonboundary
1_1576505_1576885	AT1G05380	AT1G05380	1	1576822	1582672	+	63	Promoter
1_1587703_1588153	AT1G05410	AT1G05410	1	1585371	1587794	-	91	Promoter
1_1607768_1608072	CVP2	AT1G05470	1	1607202	1611840	-	3768	Intronexonboundary
1_1611546_1611902	CVP2	AT1G05470	1	1607202	1611840	-	62	Promoter
1_1612532_1612984	CVP2	AT1G05470	1	1607202	1611840	-	692	Promoter
1_1618133_1618419	chr31	AT1G05490	1	1618504	1623489	-	5070	Intergenic
1_1639063_1639391	AT1G05540	AT1G05540	1	1639223	1640879	+	160	Promoter
1_1645243_1645484	UGT75B1	AT1G05560	1	1645300	1647435	-	1951	3UTR
1_1659294_1660219	CALS1	AT1G05570	1	1647575	1659611	-	317	Promoter
1_1661259_1661605	AT1G05575	AT1G05575	1	1661550	1662259	-	654	3UTR
1_1693562_1693853	AT1G05660	AT1G05660	1	1694070	1696191	-	2338	Intergenic
1_1700972_1701341	AT1G05670	AT1G05670	1	1697541	1701065	-	93	Promoter
1_1713386_1713791	AT1G05700	AT1G05700	1	1709673	1713474	+	3713	Intronexonboundary
1_1714068_1714475	AT1G05710	AT1G05710	1	1714818	1717290	+	343	Promoter
1_1714775_1715085	AT1G05710	AT1G05710	1	1714818	1717290	+	43	Promoter
1_1715364_1715600	AT1G05710	AT1G05710	1	1714818	1717290	+	546	5UTR
1_1729373_1729637	AT1G05783	AT1G05783	1	1728658	1729789	-	152	Intronexonboundary
1_1732374_1732650	AT1G05785	AT1G05785	1	1730242	1732657	+	2132	3UTR
1_1744525_1744911	AT1G05805	AT1G05805	1	1744444	1747734	+	81	5UTR
1_1745726_1746073	AT1G05805	AT1G05805	1	1744444	1747734	+	1282	Intron
1_1768619_1769187	AT1G05860	AT1G05860	1	1768986	1771286	+	201	Promoter
1_1773163_1774091	AT1G05870	AT1G05870	1	1771385	1773385	-	222	Promoter
1_1779779_1780107	ARI5	AT1G05890	1	1779256	1784675	+	523	Intronexonboundary
1_1798891_1799102	AT1G05930	AT1G05930	1	1799418	1800933	+	316	Promoter
1_1803890_1804228	CAT9	AT1G05940	1	1801110	1804000	-	110	Promoter
1_1807478_1807945	AT1G05960	AT1G05960	1	1807960	1815568	-	7623	Intergenic
1_1815407_1815898	AT1G05970	AT1G05970	1	1815825	1817336	-	1438	3UTR
1_1820184_1820495	AT1G06000	AT1G06000	1	1820308	1821894	-	1399	3UTR
1_1821826_1822402	AT1G06000	AT1G06000	1	1820308	1821894	-	68	Promoter
1_1829674_1830700	AT1G06045	AT1G06045	1	1829522	1829865	+	152	Intronexonboundary
1_1837612_1837817	AT1G06070	AT1G06070	1	1834829	1837758	-	59	Promoter
1_1838074_1838398	AT1G06070	AT1G06070	1	1834829	1837758	-	316	Promoter
1_1854932_1855278	SKIP16	AT1G06110	1	1853059	1855378	-	100	5UTR
1_1877629_1877979	AT1G06148	AT1G06148	1	1874885	1877573	-	56	Promoter
1_1882620_1882907	ORA59	AT1G06160	1	1882907	1883992	+	0	Promoter
1_1887320_1887632	AT1G06170	AT1G06170	1	1884981	1886904	-	416	Promoter
1_1887930_1888564	MYB13	AT1G06180	1	1889362	1891276	+	798	Promoter
1_1894109_1894442	RHON1	AT1G06190	1	1892231	1894194	-	85	Promoter
1_1896782_1896999	AT1G06200	AT1G06200	1	1894289	1897027	-	28	Intronexonboundary
1_1907033_1907273	GTE4	AT1G06230	1	1906963	1911056	+	70	Intronexonboundary
1_1922123_1922404	ACX3	AT1G06290	1	1922208	1926278	+	85	Promoter
1_1926405_1926659	ACX6	AT1G06310	1	1926652	1930397	+	7	Promoter
1_1933099_1933414	AT1G06340	AT1G06340	1	1933284	1934103	-	689	3UTR
1_1946422_1947041	AT1G06380	AT1G06380	1	1944993	1946303	+	1429	Intergenic
1_1952618_1953042	ARA-2	AT1G06400	1	1950596	1952880	-	162	Promoter
1_1953583_1954237	TPS7	AT1G06410	1	1954674	1958866	+	437	Promoter
1_1958714_1958931	AT1G06420	AT1G06420	1	1958878	1960027	+	53	Promoter
1_1974269_1974686	AT1G06475	AT1G06475	1	1973834	1974407	-	138	Promoter
1_1989271_1989527	AT1G06500	AT1G06500	1	1989479	1990730	+	48	Promoter
1_1992150_1992396	AT1G06515	AT1G06515	1	1990634	1992228	-	78	Promoter
1_1997168_1998124	GPAT1	AT1G06520	1	1993903	1996355	-	813	Promoter
1_1998325_1998709	GPAT1	AT1G06520	1	1993903	1996355	-	1970	1to5kb
1_1998958_1999289	PMD2	AT1G06530	1	2001382	2002802	+	2093	1to5kb
1_2000722_2000944	PMD2	AT1G06530	1	2001382	2002802	+	438	Promoter
1_2001305_2001664	PMD2	AT1G06530	1	2001382	2002802	+	77	Promoter
1_2006943_2007949	AT1G06550	AT1G06550	1	2003627	2007212	-	269	Promoter
1_2013359_2013913	AT1G06580	AT1G06580	1	2013996	2016273	-	2360	Intergenic
1_2024627_2024858	AT1G06590	AT1G06590	1	2016306	2024749	-	109	Promoter
1_2040195_2040550	JASON	AT1G06660	1	2037311	2040419	-	131	Promoter
1_2047590_2048072	PSBP-1	AT1G06680	1	2047634	2049439	+	44	Promoter
1_2051900_2052401	AT1G06700	AT1G06700	1	2052370	2055548	-	3147	3UTR
1_2055124_2055461	AT1G06700	AT1G06700	1	2052370	2055548	-	87	5UTR
1_2055748_2056180	AT1G06710	AT1G06710	1	2055745	2060429	-	4249	Intronexonboundary
1_2069950_2070748	MUG3	AT1G06740	1	2070737	2073374	+	11	Promoter
1_2077543_2077810	AT1G06760	AT1G06760	1	2076504	2077767	-	43	Promoter
1_2082736_2083420	GAUT6	AT1G06780	1	2083311	2087141	+	109	Promoter
1_2086916_2087241	AT1G06790	AT1G06790	1	2087182	2089786	+	59	Promoter
1_2089606_2090165	AT1G06790	AT1G06790	1	2087182	2089786	+	2424	3UTR
1_2090893_2091261	PLA-I{gamma}1	AT1G06800	1	2089417	2091686	-	425	Exon
1_2104323_2104653	bZIP52	AT1G06850	1	2105048	2106749	+	395	Promoter
1_2123860_2124097	TRFL7	AT1G06910	1	2120991	2123801	+	2869	Intergenic
1_2125714_2126516	AT1G06923	AT1G06923	1	2126670	2127570	+	154	Promoter
1_2141005_2141329	CHX14	AT1G06970	1	2137871	2140975	+	3134	Intergenic
1_2142506_2142806	AT1G06980	AT1G06980	1	2142939	2143977	-	1171	Intergenic
1_2148153_2148356	AT1G06990	AT1G06990	1	2148342	2150152	+	14	Promoter
1_2152311_2153079	EXO70B2	AT1G07000	1	2150158	2152541	-	230	Promoter
1_2155926_2156274	AT1G07020	AT1G07020	1	2155213	2156153	-	121	Promoter
1_2163012_2164613	AT1G07040	AT1G07040	1	2160919	2163387	-	375	Promoter
1_2168282_2168656	AT1G07070	AT1G07070	1	2168561	2169957	+	95	Promoter
1_2174701_2175225	LSH6	AT1G07090	1	2173952	2175038	-	187	Promoter
1_2176163_2176557	LSH6	AT1G07090	1	2173952	2175038	-	1125	1to5kb
1_2176828_2177122	F2KP	AT1G07110	1	2178022	2184193	-	7071	Intergenic
1_2177566_2177795	F2KP	AT1G07110	1	2178022	2184193	-	6398	Intergenic
1_2183967_2184437	F2KP	AT1G07110	1	2178022	2184193	-	226	Promoter
1_2187180_2187726	STN1	AT1G07130	1	2187776	2188733	+	50	Promoter
1_2187884_2188184	STN1	AT1G07130	1	2187776	2188733	+	108	5UTR
1_2193589_2193878	SIRANBP	AT1G07140	1	2191679	2193836	-	42	Promoter
1_2194556_2194967	MAPKKK13	AT1G07150	1	2193941	2195996	-	1029	Exon
1_2195732_2195971	MAPKKK13	AT1G07150	1	2193941	2195996	-	25	5UTR
1_2199975_2200217	AT1G07170	AT1G07170	1	2199997	2201272	+	22	Promoter
1_2203705_2204052	NDA1	AT1G07180	1	2204104	2207099	+	52	Promoter
1_2212028_2213812	AT1G07200	AT1G07200	1	2208477	2212718	-	690	Promoter
1_2214000_2215371	AT1G07210	AT1G07210	1	2215216	2216982	+	155	Promoter
1_2218493_2218692	AT1G07220	AT1G07220	1	2216925	2219649	-	957	Intronexonboundary
1_2219247_2220788	AT1G07220	AT1G07220	1	2216925	2219649	-	402	Promoter
1_2222809_2223522	UGT71C5	AT1G07240	1	2223625	2225524	+	103	Promoter
1_2224121_2225018	UGT71C5	AT1G07240	1	2223625	2225524	+	496	Exon
1_2226850_2227176	UGT71C3	AT1G07260	1	2227594	2229357	-	2181	Intergenic
1_2237663_2238132	AT1G07280	AT1G07280	1	2238017	2241471	+	115	Promoter
1_2260030_2260538	SR45a	AT1G07350	1	2257384	2260187	-	157	Promoter
1_2268918_2269251	AT1G07380	AT1G07380	1	2264634	2269121	-	130	Promoter
1_2277573_2277890	SMO2-1	AT1G07420	1	2277555	2280502	+	18	Intronexonboundary
1_2280437_2281019	SMO2-1	AT1G07420	1	2277555	2280502	+	2882	3UTR
1_2284196_2284492	HAI2	AT1G07430	1	2280746	2282828	-	1368	1to5kb
1_2289563_2289818	AT1G07460	AT1G07460	1	2289959	2291101	+	141	Promoter
1_2305078_2305428	AT1G07500	AT1G07500	1	2304766	2305031	-	47	Promoter
1_2311956_2312413	ftsh10	AT1G07510	1	2304435	2312399	+	7521	3UTR
1_2316372_2316588	SCL14	AT1G07530	1	2313581	2316507	-	81	Promoter
1_2317869_2318205	TRFL2	AT1G07540	1	2318143	2321664	-	3459	3UTR
1_2322209_2322690	AT1G07550	AT1G07550	1	2322543	2326570	-	3880	3UTR
1_2333609_2333891	APK1A	AT1G07570	1	2331136	2333767	-	124	Promoter
1_2335811_2336354	AT1G07590	AT1G07590	1	2336477	2339391	-	3037	Intergenic
1_2340539_2341006	MT1C	AT1G07610	1	2341447	2342148	+	441	Promoter
1_2344238_2344437	ATOBGM	AT1G07620	1	2344390	2346889	-	2452	3UTR
1_2347318_2349185	PLL5	AT1G07630	1	2348915	2351799	+	270	Promoter
1_2364612_2364895	AT1G07650	AT1G07650	1	2359111	2366736	-	1841	Intronexonboundary
1_2368336_2368707	DSI-1VOC	AT1G07645	1	2367437	2368436	-	100	Promoter
1_2374459_2375101	ECA4	AT1G07670	1	2370020	2374607	-	148	Promoter
1_2375524_2376148	AT1G07680	AT1G07680	1	2376012	2377186	+	136	Promoter
1_2394960_2395663	EXO70H6	AT1G07725	1	2394801	2397272	-	1609	3UTR
1_2402849_2403107	RAD51D	AT1G07745	1	2400589	2402942	-	93	Promoter
1_2406647_2406940	RPS15A	AT1G07770	1	2407411	2409791	-	2851	Intergenic
1_2409447_2409835	PAI1	AT1G07780	1	2409865	2412777	-	2942	Intergenic
1_2412642_2412935	HTB1	AT1G07790	1	2412938	2413790	+	3	Promoter
1_2416064_2416290	ECA1	AT1G07810	1	2416178	2420829	+	112	Promoter
1_2422114_2422350	AT1G07830	AT1G07830	1	2422126	2423803	+	12	Promoter
1_2423858_2424191	AT1G07830	AT1G07830	1	2422126	2423803	+	1732	Intergenic
1_2431885_2432366	AT1G07870	AT1G07870	1	2428773	2432091	-	206	Promoter
1_2433948_2434157	ATMPK13	AT1G07880	1	2433896	2435858	-	1701	3UTR
1_2436653_2437696	AT1G07885	AT1G07885	1	2435858	2436861	-	208	Promoter
1_2445135_2445550	AT1G07902	AT1G07902	1	2443918	2445140	+	1217	3UTR
1_2457340_2457727	AT1G07920	AT1G07920	1	2454771	2457321	+	2569	Intergenic
1_2458162_2458386	AT1G07930	AT1G07930	1	2458184	2460817	+	22	Promoter
1_2462064_2462336	AT1G07940	AT1G07940	1	2462949	2465545	-	3209	Intergenic
1_2465396_2465769	MED22B	AT1G07950	1	2465729	2467165	-	1396	3UTR
1_2466973_2467276	MED22B	AT1G07950	1	2465729	2467165	-	111	Promoter
1_2474854_2475088	NF-YC10	AT1G07980	1	2473165	2475128	-	40	5UTR
1_2476853_2477263	AT1G07990	AT1G07990	1	2476953	2483196	+	100	Promoter
1_2482788_2483446	GATA10	AT1G08000	1	2483240	2485726	-	2280	3UTR
1_2484783_2485426	AT1G08005	AT1G08005	1	2485281	2485724	+	145	Promoter
1_2487713_2488140	GATA11	AT1G08010	1	2485848	2488085	-	55	Promoter
1_2488491_2488999	GATA11	AT1G08010	1	2485848	2488085	-	406	Promoter
1_2489488_2489761	TPST	AT1G08030	1	2489409	2493327	-	3566	Intronexonboundary
1_2490419_2490753	TPST	AT1G08030	1	2489409	2493327	-	2574	Intronexonboundary
1_2498521_2499265	AT1G08040	AT1G08040	1	2495309	2498764	-	243	Promoter
1_2516610_2516827	OTP82	AT1G08070	1	2514150	2516620	-	10	Promoter
1_2520615_2521090	ACA7	AT1G08080	1	2516991	2518611	-	2004	1to5kb
1_2530263_2530590	NRT2.2	AT1G08100	1	2527170	2529120	-	1143	1to5kb
1_2537996_2538761	AT1G08110	AT1G08110	1	2535251	2537932	+	2745	Intronexonboundary
1_2542266_2542634	LIG1	AT1G08130	1	2542663	2547946	-	5312	Intergenic
1_2547797_2548441	CHX6B	AT1G08135	1	2548496	2551544	-	3103	Intergenic
1_2560926_2561520	AT1G08165	AT1G08165	1	2561449	2562316	-	796	3UTR
1_2563739_2564364	AT1G08180	AT1G08180	1	2564361	2565318	-	954	3UTR
1_2565002_2565846	AT1G08180	AT1G08180	1	2564361	2565318	-	316	Promoter
1_2566258_2566762	VPS41	AT1G08190	1	2567420	2573448	+	658	Promoter
1_2567018_2567553	VPS41	AT1G08190	1	2567420	2573448	+	133	Promoter
1_2567846_2568133	VPS41	AT1G08190	1	2567420	2573448	+	426	Intronexonboundary
1_2576640_2576840	AXS2	AT1G08200	1	2573818	2576844	-	4	5UTR
1_2580398_2581044	AT1G08220	AT1G08220	1	2581022	2583390	-	2346	3UTR
1_2590527_2590840	ADT6	AT1G08250	1	2588776	2590609	-	82	Promoter
1_2607638_2608083	AT1G08270	AT1G08270	1	2606269	2607507	-	131	Promoter
1_2621387_2621873	TGA9	AT1G08320	1	2621860	2628594	-	6721	3UTR
1_2629617_2630659	AT1G08340	AT1G08340	1	2630891	2632871	+	232	Promoter
1_2635793_2636054	AT1G08350	AT1G08350	1	2632810	2635866	-	73	Promoter
1_2645973_2646299	AT1G08400	AT1G08400	1	2643019	2646048	-	75	Promoter
1_2648961_2649915	BSL2	AT1G08420	1	2649459	2657120	+	456	Promoter
1_2672295_2672622	HDA08	AT1G08460	1	2672198	2674721	+	97	5UTR
1_2680849_2681455	SSL3	AT1G08470	1	2682058	2684171	-	2716	Intergenic
1_2681871_2682079	SSL3	AT1G08470	1	2682058	2684171	-	2092	3UTR
1_2684001_2684352	SSL3	AT1G08470	1	2682058	2684171	-	170	Promoter
1_2688564_2688984	CPNIFS	AT1G08490	1	2685659	2688658	-	94	Promoter
1_2694594_2694834	FATB	AT1G08510	1	2691062	2694547	-	47	Promoter
1_2701006_2701254	ALB1	AT1G08520	1	2696381	2701022	+	4625	3UTR
1_2711044_2711301	SYP111	AT1G08560	1	2709525	2711000	-	44	Promoter
1_2712035_2713030	ACHT4	AT1G08570	1	2712694	2714833	+	336	Promoter
1_2721870_2722197	AT1G08590	AT1G08590	1	2718538	2722280	+	3332	3UTR
1_2735812_2736041	AT1G08610	AT1G08610	1	2733596	2735819	-	7	Promoter
1_2746643_2747485	THA1	AT1G08630	1	2743761	2747967	-	482	Intronexonboundary
1_2747848_2748476	CJD1	AT1G08640	1	2748361	2751620	-	3144	3UTR
1_2748773_2749119	CJD1	AT1G08640	1	2748361	2751620	-	2501	Intronexonboundary
1_2752089_2752487	PPCK1	AT1G08650	1	2752124	2753809	+	35	Promoter
1_2753150_2754158	PPCK1	AT1G08650	1	2752124	2753809	+	1026	Intronexonboundary
1_2755450_2755742	MGP2	AT1G08660	1	2756904	2759889	-	4147	Intergenic
1_2756586_2756813	MGP2	AT1G08660	1	2756904	2759889	-	3076	Intergenic
1_2762495_2762718	ZIGA4	AT1G08680	1	2762584	2768967	+	89	Promoter
1_2771374_2771638	AT1G08710	AT1G08710	1	2771620	2773531	+	18	Promoter
1_2773791_2773991	EDR1	AT1G08720	1	2773941	2779308	+	50	Promoter
1_2805139_2805385	AT1G08760	AT1G08760	1	2805044	2808623	+	95	5UTR
1_2811098_2811454	AIP3	AT1G08780	1	2809778	2811313	-	141	Promoter
1_2817850_2818210	AT1G08800	AT1G08800	1	2812818	2818071	-	139	Promoter
1_2818957_2819347	MYB60	AT1G08810	1	2819065	2820478	-	1131	3UTR
1_2821426_2821752	VAP27-2	AT1G08820	1	2821354	2825481	-	3729	3UTR
1_2855882_2856219	AT1G08910	AT1G08910	1	2856162	2861170	+	57	Promoter
1_2871844_2872116	ESL1	AT1G08920	1	2867203	2870745	+	4641	Intergenic
1_2879551_2879818	CAX11	AT1G08960	1	2879506	2882234	+	45	5UTR
1_2882386_2882684	NF-YC9	AT1G08970	1	2882491	2884342	+	105	Promoter
1_2910411_2910844	AT1G09040	AT1G09040	1	2911250	2915406	+	406	Promoter
1_2915975_2916181	AT1G09040	AT1G09040	1	2911250	2915406	+	4725	Intergenic
1_2917034_2917233	AT1G09050	AT1G09050	1	2916968	2921111	+	66	Intronexonboundary
1_2927536_2927803	SRC2	AT1G09070	1	2927502	2929107	+	34	5UTR
1_2942207_2942589	SR30	AT1G09140	1	2942538	2945976	-	3387	3UTR
1_2945853_2946245	SR30	AT1G09140	1	2942538	2945976	-	123	Promoter
1_2948758_2949504	PP2-B15	AT1G09155	1	2949621	2950989	-	1485	Intergenic
1_2949671_2950038	PP2-B15	AT1G09155	1	2949621	2950989	-	951	3UTR
1_2950751_2951330	PP2-B15	AT1G09155	1	2949621	2950989	-	238	Promoter
1_2972390_2972691	CRT1b	AT1G09210	1	2972638	2977002	-	4311	3UTR
1_2976894_2977167	CRT1b	AT1G09210	1	2972638	2977002	-	108	Promoter
1_2982536_2982796	AT1G09230	AT1G09230	1	2979511	2982713	-	83	Promoter
1_2987594_2987941	AT1G09245	AT1G09245	1	2986874	2987393	-	201	Promoter
1_3012177_3012729	AT1G09330	AT1G09330	1	3012739	3015255	-	2526	Intergenic
1_3015011_3015355	AT1G09330	AT1G09330	1	3012739	3015255	-	100	Promoter
1_3030540_3031133	AT1G09390	AT1G09390	1	3031046	3033582	+	87	Promoter
1_3041662_3042041	ACLA-3	AT1G09430	1	3041996	3045541	+	45	Promoter
1_3058301_3058554	AT1G09480	AT1G09480	1	3057975	3060757	+	326	Intronexonboundary
1_3063962_3064229	AT1G09490	AT1G09490	1	3063936	3065949	+	26	5UTR
1_3071946_3072441	AT1G09520	AT1G09520	1	3070915	3072074	-	128	Promoter
1_3075314_3075850	PIF3	AT1G09530	1	3075768	3079654	+	82	Promoter
1_3092342_3092860	AT1G09550	AT1G09550	1	3089576	3092327	-	15	Promoter
1_3093163_3093961	GLP5	AT1G09560	1	3093644	3094954	+	317	Promoter
1_3100196_3100458	PHYA	AT1G09570	1	3095160	3100819	-	361	5UTR
1_3100691_3100904	PHYA	AT1G09570	1	3095160	3100819	-	85	Promoter
1_3101235_3101484	AT1G09575	AT1G09575	1	3101149	3103677	-	2193	3UTR
1_3104231_3104666	AT1G09580	AT1G09580	1	3104492	3106366	+	174	Promoter
1_3116500_3116808	AT1G09620	AT1G09620	1	3112778	3116699	-	109	Promoter
1_3119662_3119866	RAB11c	AT1G09630	1	3118155	3119815	-	51	Promoter
1_3130779_3131358	AT1G09660	AT1G09660	1	3127762	3131094	-	264	Promoter
1_3137397_3137853	AT1G09690	AT1G09690	1	3136188	3137684	-	169	Promoter
1_3140675_3140972	AT1G09710	AT1G09710	1	3140862	3144381	+	110	Promoter
1_3171987_3172193	AT1G09794	AT1G09794	1	3171905	3173510	+	82	Intronexonboundary
1_3180234_3180864	ECT11	AT1G09810	1	3180926	3184224	-	3360	Intergenic
1_3184123_3184539	ECT11	AT1G09810	1	3180926	3184224	-	101	Promoter
1_3186952_3187195	AT1G09812	AT1G09812	1	3187442	3188854	+	247	Promoter
1_3194926_3195715	SK41	AT1G09840	1	3195719	3200403	-	4688	Intergenic
1_3200757_3201437	XBCP3	AT1G09850	1	3201685	3204150	+	248	Promoter
1_3205582_3205809	AT1G09870	AT1G09870	1	3205579	3208714	+	3	5UTR
1_3226978_3227205	AT1G09920	AT1G09920	1	3224684	3227083	-	105	Promoter
1_3239366_3239565	HEMA2	AT1G09940	1	3236908	3239554	-	11	Promoter
1_3240410_3240808	RAS1	AT1G09950	1	3240531	3241863	-	1055	3UTR
1_3242886_3243229	SUT4	AT1G09960	1	3243986	3247216	+	757	Promoter
1_3244032_3244231	SUT4	AT1G09960	1	3243986	3247216	+	46	5UTR
1_3248871_3249417	SUT4	AT1G09960	1	3243986	3247216	+	4885	Intergenic
1_3249992_3250586	LRR XI-23	AT1G09970	1	3252098	3255782	+	1512	1to5kb
1_3261311_3261906	AT1G09980	AT1G09980	1	3256189	3261741	-	165	Promoter
1_3265532_3265816	AAP8	AT1G10010	1	3265886	3268823	+	70	Promoter
1_3269348_3269657	AT1G10020	AT1G10020	1	3269539	3272110	-	2453	3UTR
1_3271860_3272887	AT1G10020	AT1G10020	1	3269539	3272110	-	250	Promoter
1_3273618_3273884	ERG28	AT1G10030	1	3273753	3275953	+	131	Promoter
1_3278595_3278988	AT1G10040	AT1G10040	1	3275891	3278779	-	184	Promoter
1_3296227_3296474	AT1G10090	AT1G10090	1	3290311	3296198	-	29	Promoter
1_3302112_3302430	AT1G10110	AT1G10110	1	3302564	3303938	+	134	Promoter
1_3306148_3306456	AT1G10120	AT1G10120	1	3304039	3306956	-	500	5UTR
1_3325049_3325625	AT1G10150	AT1G10150	1	3325799	3327614	+	174	Promoter
1_3325797_3326094	AT1G10150	AT1G10150	1	3325799	3327614	+	2	Promoter
1_3338020_3338291	NFXL1	AT1G10170	1	3333504	3338188	-	103	Promoter
1_3342043_3342344	AT1G10180	AT1G10180	1	3338185	3341628	-	415	Promoter
1_3346063_3346340	WLIM1	AT1G10200	1	3346383	3348139	-	1799	Intergenic
1_3347648_3347952	WLIM1	AT1G10200	1	3346383	3348139	-	187	Intronexonboundary
1_3348252_3349311	WLIM1	AT1G10200	1	3346383	3348139	-	113	Promoter
1_3351110_3351657	MPK1	AT1G10210	1	3349082	3351180	+	2028	3UTR
1_3351794_3352146	AT1G10220	AT1G10220	1	3351923	3353122	+	129	Promoter
1_3353963_3354297	AT1G10225	AT1G10225	1	3354243	3354856	+	54	Promoter
1_3354966_3355195	AT1G10225	AT1G10225	1	3354243	3354856	+	723	Intergenic
1_3355357_3355716	SK18	AT1G10230	1	3355675	3356151	+	41	Promoter
1_3356454_3356856	FRS11	AT1G10240	1	3356627	3359853	-	2997	3UTR
1_3363076_3363501	GRP23	AT1G10270	1	3363432	3366493	+	69	Promoter
1_3369888_3370103	ADL6	AT1G10290	1	3370402	3377463	+	299	Promoter
1_3397169_3397383	GSTU18	AT1G10360	1	3395551	3396953	-	216	Promoter
1_3398798_3399097	ERD9	AT1G10370	1	3396883	3398358	-	440	Promoter
1_3413270_3413469	AT1G10390	AT1G10390	1	3406956	3412874	-	396	Promoter
1_3419393_3419679	AT1G10410	AT1G10410	1	3416430	3419691	-	12	Intronexonboundary
1_3420017_3420224	AT1G10410	AT1G10410	1	3416430	3419691	-	326	Promoter
1_3422409_3422924	AT1G10417	AT1G10417	1	3424186	3427531	-	4607	Intergenic
1_3431022_3431385	PP2A-2	AT1G10430	1	3428478	3430924	-	98	Promoter
1_3461468_3461699	CPISCA	AT1G10500	1	3460000	3461485	-	17	Promoter
1_3474327_3474603	NAT8	AT1G10540	1	3474858	3478028	-	3425	Intergenic
1_3477911_3478183	NAT8	AT1G10540	1	3474858	3478028	-	117	Promoter
1_3478491_3478890	XTH33	AT1G10550	1	3479066	3481041	-	2151	Intergenic
1_3482595_3482951	PUB18	AT1G10560	1	3484399	3486965	+	1448	1to5kb
1_3484266_3484815	PUB18	AT1G10560	1	3484399	3486965	+	133	Promoter
1_3503560_3503849	AT1G10590	AT1G10590	1	3501988	3503544	-	16	Promoter
1_3521047_3521256	AT1G10650	AT1G10650	1	3523986	3526531	-	5275	Intergenic
1_3523499_3523975	AT1G10650	AT1G10650	1	3523986	3526531	-	2556	Intergenic
1_3524173_3524467	AT1G10650	AT1G10650	1	3523986	3526531	-	2064	Exon
1_3526127_3526645	AT1G10650	AT1G10650	1	3523986	3526531	-	114	Promoter
1_3527538_3527824	AT1G10650	AT1G10650	1	3523986	3526531	-	1007	1to5kb
1_3529047_3529893	AT1G10657	AT1G10657	1	3530353	3532017	+	460	Promoter
1_3530186_3530606	AT1G10657	AT1G10657	1	3530353	3532017	+	167	Promoter
1_3534982_3535618	AT1G10660	AT1G10660	1	3532229	3535137	+	2753	3UTR
1_3545487_3545792	PGP10	AT1G10680	1	3538333	3543925	-	1562	1to5kb
1_3558102_3558368	PHS1	AT1G10710	1	3558358	3560705	+	10	Promoter
1_3571759_3571966	AT1G10740	AT1G10740	1	3567905	3571053	-	706	Promoter
1_3610553_3610764	TIF3H1	AT1G10840	1	3607631	3610616	-	63	Promoter
1_3616063_3616390	AT1G10865	AT1G10865	1	3614513	3616308	-	82	Promoter
1_3627510_3627776	AT1G10890	AT1G10890	1	3627646	3630808	+	130	Promoter
1_3639346_3639856	EMB3103	AT1G10910	1	3639835	3644187	+	21	Promoter
1_3658531_3658855	SNRK2.4	AT1G10940	1	3655673	3658612	-	81	Promoter
1_3659018_3659346	TMN1	AT1G10950	1	3659204	3664264	+	142	Promoter
1_3664120_3664581	FD1	AT1G10960	1	3664187	3665040	+	67	Promoter
1_3702139_3702481	AT1G11090	AT1G11090	1	3702608	3703779	+	127	Promoter
1_3702599_3702815	AT1G11090	AT1G11090	1	3702608	3703779	+	9	Promoter
1_3715829_3716039	AT1G11120	AT1G11120	1	3715084	3717659	+	745	Intron
1_3719472_3719688	AT1G11125	AT1G11125	1	3718652	3719832	+	820	3UTR
1_3720957_3721241	AT1G11125	AT1G11125	1	3718652	3719832	+	2305	Intergenic
1_3721456_3721685	SUB	AT1G11130	1	3722708	3727450	+	1023	1to5kb
1_3740564_3740848	AT1G11170	AT1G11170	1	3740664	3744675	+	100	Promoter
1_3744456_3744665	AT1G11170	AT1G11170	1	3740664	3744675	+	3792	Intronexonboundary
1_3745116_3745704	SCAMP2	AT1G11180	1	3745774	3748557	+	70	Promoter
1_3757020_3757239	AT1G11210	AT1G11210	1	3755668	3756998	-	22	Promoter
1_3761052_3761280	AT1G11220	AT1G11220	1	3759862	3761461	-	181	5UTR
1_3764452_3764667	AT1G11230	AT1G11230	1	3763268	3764483	-	31	Promoter
1_3768207_3768472	SYP125	AT1G11250	1	3768521	3770102	+	49	Promoter
1_3775524_3775868	STP1	AT1G11260	1	3777236	3780823	+	1368	1to5kb
1_3777235_3777642	STP1	AT1G11260	1	3777236	3780823	+	1	Promoter
1_3778460_3778977	STP1	AT1G11260	1	3777236	3780823	+	1224	Intronexonboundary
1_3837446_3837694	PYM	AT1G11400	1	3837694	3841218	+	0	Promoter
1_3847004_3847206	MORF9	AT1G11430	1	3847220	3849224	+	14	Promoter
1_3848861_3849423	MORF9	AT1G11430	1	3847220	3849224	+	1641	Intronexonboundary
1_3881310_3881612	AT1G11560	AT1G11560	1	3881627	3882819	+	15	Promoter
1_3891659_3892148	AT1G11590	AT1G11590	1	3892580	3894677	+	432	Promoter
1_3896827_3897130	AT1G11591	AT1G11591	1	3895130	3896019	+	1697	Exon
1_3901468_3901729	CYP77B1	AT1G11600	1	3901950	3903895	+	221	Promoter
1_3909687_3909947	CYP71A18	AT1G11610	1	3906862	3909338	-	349	Promoter
1_3920190_3920524	AT1G11660	AT1G11660	1	3920478	3924566	+	46	Promoter
1_3929844_3930136	AT1G11670	AT1G11670	1	3928115	3931701	-	1565	Intron
1_3931478_3932098	AT1G11670	AT1G11670	1	3928115	3931701	-	223	Promoter
1_3932835_3933054	AT1G11670	AT1G11670	1	3928115	3931701	-	1134	1to5kb
1_3933850_3935032	AT1G11670	AT1G11670	1	3928115	3931701	-	2149	1to5kb
1_3936651_3936938	CYP51G1	AT1G11680	1	3938422	3940871	+	1484	1to5kb
1_3937174_3937677	CYP51G1	AT1G11680	1	3938422	3940871	+	745	Promoter
1_3943216_3943556	AT1G11690	AT1G11690	1	3941469	3942212	+	1747	Intronexonboundary
1_3944933_3945945	AT1G11700	AT1G11700	1	3945584	3946757	+	361	Promoter
1_3947673_3948828	AT1G11710	AT1G11710	1	3948714	3951359	+	114	Promoter
1_3950868_3951337	AT1G11710	AT1G11710	1	3948714	3951359	+	2154	3UTR
1_3960794_3961093	AT1G11730	AT1G11730	1	3957284	3960464	+	3510	Intronexonboundary
1_3967250_3967551	CLPP6	AT1G11750	1	3967476	3969877	+	75	Promoter
1_3994701_3995477	GLX1	AT1G11840	1	3995158	3997965	+	319	Promoter
1_4000561_4000824	AT1G11860	AT1G11860	1	4001113	4003748	+	289	Promoter
1_4010313_4010837	SEC22	AT1G11890	1	4010757	4013104	+	80	Promoter
1_4020874_4021355	APA1	AT1G11910	1	4016712	4021043	-	169	Promoter
1_4030972_4031374	AT1G11940	AT1G11940	1	4031534	4034155	-	2781	Intergenic
1_4038582_4039116	AT1G11950	AT1G11950	1	4034479	4039065	-	51	Promoter
1_4039439_4039716	AT1G11960	AT1G11960	1	4039566	4044046	-	4330	3UTR
1_4044259_4044505	AT1G11970	AT1G11970	1	4044370	4044669	+	111	Promoter
1_4053655_4054109	AT1G12000	AT1G12000	1	4049896	4053871	-	216	Promoter
1_4058817_4059250	AT1G12010	AT1G12010	1	4056165	4057968	+	2652	Intergenic
1_4062796_4063008	AT1G12020	AT1G12020	1	4061363	4063549	-	541	Exon
1_4063254_4063469	AT1G12020	AT1G12020	1	4061363	4063549	-	80	5UTR
1_4080517_4080757	AT1G12070	AT1G12070	1	4078547	4080236	-	281	Promoter
1_4081802_4082165	AT1G12070	AT1G12070	1	4078547	4080236	-	1566	1to5kb
1_4085624_4085866	AT1G12080	AT1G12080	1	4084162	4085185	+	1462	Intergenic
1_4097126_4097375	AT1G12100	AT1G12100	1	4095246	4095883	+	1880	Intergenic
1_4103279_4103655	NRT1.1	AT1G12110	1	4105223	4109601	+	1568	1to5kb
1_4104197_4104419	NRT1.1	AT1G12110	1	4105223	4109601	+	804	Promoter
1_4107789_4108057	NRT1.1	AT1G12110	1	4105223	4109601	+	2566	Intron
1_4114396_4114742	AT1G12120	AT1G12120	1	4114674	4117614	-	2872	3UTR
1_4117303_4118172	AT1G12120	AT1G12120	1	4114674	4117614	-	311	Promoter
1_4121254_4121511	FMO GS-OX5	AT1G12140	1	4121285	4124595	+	31	Promoter
1_4137360_4137670	FMO	AT1G12200	1	4137511	4140158	+	151	Promoter
1_4139919_4140211	RFL1	AT1G12210	1	4140216	4143916	+	5	Promoter
1_4147808_4148037	AT1G12230	AT1G12230	1	4147962	4151056	+	75	Promoter
1_4150807_4151473	AT1G12230	AT1G12230	1	4147962	4151056	+	2845	3UTR
1_4152164_4152642	ATBETAFRUCT4	AT1G12240	1	4153641	4157653	+	999	Promoter
1_4154761_4155236	ATBETAFRUCT4	AT1G12240	1	4153641	4157653	+	1120	Intronexonboundary
1_4171929_4172181	Hop1	AT1G12270	1	4172035	4174730	+	106	Promoter
1_4182590_4182944	AT1G12290	AT1G12290	1	4177917	4182593	-	3	Promoter
1_4187758_4188170	AT1G12310	AT1G12310	1	4186653	4188233	-	63	Intronexonboundary
1_4188291_4188841	AT1G12310	AT1G12310	1	4186653	4188233	-	58	Promoter
1_4189195_4189413	AT1G12320	AT1G12320	1	4186624	4190342	+	2571	Intronexonboundary
1_4191458_4191846	AT1G12320	AT1G12320	1	4186624	4190342	+	4834	Intergenic
1_4192227_4192554	AT1G12330	AT1G12330	1	4194420	4196749	+	1866	1to5kb
1_4192810_4193278	AT1G12330	AT1G12330	1	4194420	4196749	+	1142	1to5kb
1_4195882_4196521	AT1G12330	AT1G12330	1	4194420	4196749	+	1462	Intronexonboundary
1_4196725_4196994	AT1G12330	AT1G12330	1	4194420	4196749	+	2305	3UTR
1_4198321_4198592	AT1G12340	AT1G12340	1	4197396	4198310	+	925	Intergenic
1_4212421_4212865	AT1G12380	AT1G12380	1	4214258	4217412	-	4547	Intergenic
1_4213032_4213696	AT1G12380	AT1G12380	1	4214258	4217412	-	3716	Intergenic
1_4217024_4217393	AT1G12380	AT1G12380	1	4214258	4217412	-	19	5UTR
1_4219887_4220273	AT1G12390	AT1G12390	1	4220044	4221803	+	157	Promoter
1_4225057_4225488	AT1G12411	AT1G12411	1	4225321	4225482	-	6	Promoter
1_4226369_4226873	ACR8	AT1G12420	1	4226239	4229211	-	2338	3UTR
1_4228998_4232038	ACR8	AT1G12420	1	4226239	4229211	-	213	Promoter
1_4238649_4239977	ARK3	AT1G12430	1	4233717	4238795	-	146	Promoter
1_4242496_4243683	AT1G12450	AT1G12450	1	4243904	4245993	+	221	Promoter
1_4244166_4244457	AT1G12450	AT1G12450	1	4243904	4245993	+	262	5UTR
1_4246110_4246343	AT1G12450	AT1G12450	1	4243904	4245993	+	2206	Intergenic
1_4246921_4247340	AT1G12460	AT1G12460	1	4247218	4250758	+	122	Promoter
1_4262653_4263725	AT1G12500	AT1G12500	1	4263150	4265156	-	1431	3UTR
1_4264832_4266150	AT1G12500	AT1G12500	1	4263150	4265156	-	324	Promoter
1_4266771_4267156	CCS	AT1G12520	1	4267074	4268982	-	1826	3UTR
1_4270831_4271455	AT1G12530	AT1G12530	1	4268986	4270907	-	76	Promoter
1_4274196_4274785	AT1G12540	AT1G12540	1	4272888	4274206	+	1308	3UTR
1_4278559_4279217	EXPA7	AT1G12560	1	4276505	4277969	+	2054	Intergenic
1_4281416_4281826	AT1G12570	AT1G12570	1	4277947	4281131	-	285	Promoter
1_4282213_4282546	PEPKR1	AT1G12580	1	4282794	4285876	+	248	Promoter
1_4290919_4291156	DDF1	AT1G12610	1	4289883	4291017	-	98	Promoter
1_4319427_4319829	PEPKR2	AT1G12680	1	4319877	4323265	-	3436	Intergenic
1_4348311_4348573	AT1G12760	AT1G12760	1	4348498	4350993	+	75	Promoter
1_4353781_4354017	EMB1586	AT1G12770	1	4351019	4353797	+	2762	3UTR
1_4358114_4359450	AT1G12790	AT1G12790	1	4358895	4361371	-	1921	Intronexonboundary
1_4365265_4365653	AT1G12800	AT1G12800	1	4361551	4365414	-	149	Promoter
1_4366986_4367311	AT1G12810	AT1G12810	1	4367256	4368822	+	55	Promoter
1_4368663_4368863	AT1G12810	AT1G12810	1	4367256	4368822	+	1407	3UTR
1_4371055_4371660	AFB3	AT1G12820	1	4368760	4371298	-	243	Promoter
1_4373270_4373489	DET3	AT1G12840	1	4374205	4378514	+	716	Promoter
1_4374921_4375306	AT1G12830	AT1G12830	1	4374249	4375247	-	59	Promoter
1_4394183_4394636	GAPA-2	AT1G12900	1	4392438	4394454	-	182	Promoter
1_4398081_4398418	AT1G12930	AT1G12930	1	4398322	4405669	-	7251	3UTR
1_4418986_4419441	RSH2	AT1G12950	1	4419714	4422684	+	273	Promoter
1_4423136_4423336	AT1G12960	AT1G12960	1	4422707	4423155	-	19	Promoter
1_4432011_4432298	ESR1	AT1G12980	1	4429718	4430965	+	2293	Intergenic
1_4433295_4433720	AT1G12990	AT1G12990	1	4433605	4436102	+	115	Promoter
1_4443648_4443945	EIF4B2	AT1G13020	1	4440404	4443954	-	9	5UTR
1_4461529_4462017	CYP71B28	AT1G13090	1	4461738	4463469	+	209	Promoter
1_4480582_4480894	CYP86C3	AT1G13140	1	4478384	4480327	-	255	Promoter
1_4492449_4493084	ORP1D	AT1G13170	1	4488533	4492667	-	218	Promoter
1_4503344_4503929	AT1G13195	AT1G13195	1	4501581	4503676	-	253	Promoter
1_4514636_4514875	LINC2	AT1G13220	1	4515464	4520306	+	589	Promoter
1_4514975_4515632	LINC2	AT1G13220	1	4515464	4520306	+	168	Promoter
1_4522558_4522841	AT1G13230	AT1G13230	1	4520559	4522644	+	1999	Intronexonboundary
1_4525992_4526394	RTFL17	AT1G13245	1	4525414	4526204	-	190	Promoter
1_4527806_4528128	GATL3	AT1G13250	1	4528485	4530222	-	2094	Intergenic
1_4528330_4528716	GATL3	AT1G13250	1	4528485	4530222	-	1506	3UTR
1_4529916_4530220	GATL3	AT1G13250	1	4528485	4530222	-	2	Intronexonboundary
1_4531734_4531935	GATL3	AT1G13250	1	4528485	4530222	-	1512	1to5kb
1_4534982_4535206	GATL3	AT1G13250	1	4528485	4530222	-	4760	1to5kb
1_4539534_4539784	RAV1	AT1G13260	1	4542168	4543970	+	2384	1to5kb
1_4540124_4540327	RAV1	AT1G13260	1	4542168	4543970	+	1841	1to5kb
1_4540578_4541134	RAV1	AT1G13260	1	4542168	4543970	+	1034	1to5kb
1_4541525_4542320	RAV1	AT1G13260	1	4542168	4543970	+	152	Promoter
1_4544768_4545014	MAP1C	AT1G13270	1	4544889	4547373	+	121	Promoter
1_4548222_4548935	AOC4	AT1G13280	1	4547388	4548894	+	834	3UTR
1_4549630_4549993	DOT5	AT1G13290	1	4550153	4551620	-	1627	Intergenic
1_4553478_4553718	DOT5	AT1G13290	1	4550153	4551620	-	1858	1to5kb
1_4567670_4567955	AHP2	AT1G13330	1	4567935	4570598	+	20	Promoter
1_4576587_4577006	AT1G13350	AT1G13350	1	4572304	4576711	-	124	Promoter
1_4577453_4578313	AT1G13360	AT1G13360	1	4576873	4578369	-	56	Intronexonboundary
1_4578713_4579636	AT1G13360	AT1G13360	1	4576873	4578369	-	344	Promoter
1_4583591_4584174	AT1G13370	AT1G13370	1	4587780	4588661	-	4487	Intergenic
1_4585172_4585864	AT1G13370	AT1G13370	1	4587780	4588661	-	2797	Intergenic
1_4586138_4586886	AT1G13370	AT1G13370	1	4587780	4588661	-	1775	Intergenic
1_4590348_4590782	AT1G13380	AT1G13380	1	4588994	4590501	-	153	Promoter
1_4594070_4594523	AT1G13390	AT1G13390	1	4592304	4594468	-	55	Promoter
1_4610561_4610915	GAPC2	AT1G13440	1	4608077	4610878	-	37	Promoter
1_4611368_4611598	GAPC2	AT1G13440	1	4608077	4610878	-	490	Promoter
1_4621686_4622172	AT1G13470	AT1G13470	1	4620101	4621585	-	101	Promoter
1_4654647_4654887	bZIP58	AT1G13600	1	4650606	4651549	-	3098	1to5kb
1_4676531_4676894	AT1G13635	AT1G13635	1	4674152	4676484	+	2379	Intergenic
1_4693203_4693438	ATE1	AT1G13690	1	4693282	4694410	+	79	Promoter
1_4698805_4699031	PGL1	AT1G13700	1	4694372	4696023	-	2782	1to5kb
1_4712536_4713237	AT1G13730	AT1G13730	1	4709757	4712672	+	2779	3UTR
1_4739839_4740078	AT1G13830	AT1G13830	1	4739693	4741189	-	1111	3UTR
1_4746295_4746530	QUL1	AT1G13860	1	4743204	4746956	-	426	Intronexonboundary
1_4748712_4748931	DRL1	AT1G13870	1	4747186	4748666	-	46	Promoter
1_4771272_4771640	ELF5A-1	AT1G13950	1	4773434	4774935	+	1794	1to5kb
1_4772693_4773063	ELF5A-1	AT1G13950	1	4773434	4774935	+	371	Promoter
1_4773378_4773590	ELF5A-1	AT1G13950	1	4773434	4774935	+	56	Promoter
1_4775518_4775796	WRKY4	AT1G13960	1	4776283	4779420	+	487	Promoter
1_4776248_4776476	WRKY4	AT1G13960	1	4776283	4779420	+	35	Promoter
1_4787772_4788059	GN	AT1G13980	1	4788463	4794654	+	404	Promoter
1_4788220_4788542	GN	AT1G13980	1	4788463	4794654	+	79	Promoter
1_4797216_4797484	VIK	AT1G14000	1	4797358	4800283	+	126	Promoter
1_4801920_4802129	AT1G14010	AT1G14010	1	4800169	4801850	-	70	Promoter
1_4810240_4810446	AT1G14040	AT1G14040	1	4810115	4814724	+	125	5UTR
1_4811019_4811333	AT1G14040	AT1G14040	1	4810115	4814724	+	904	Intronexonboundary
1_4839578_4839795	PnsL2	AT1G14150	1	4839801	4840823	+	6	Promoter
1_4842139_4842733	AT1G14160	AT1G14160	1	4840562	4841848	-	291	Promoter
1_4877167_4877469	PKS2	AT1G14280	1	4877506	4879307	+	37	Promoter
1_4879187_4879835	PKS2	AT1G14280	1	4877506	4879307	+	1681	3UTR
1_4884870_4885096	AT1G14300	AT1G14300	1	4882336	4884818	-	52	Promoter
1_4888005_4888204	AT1G14315	AT1G14315	1	4886768	4887933	-	72	Promoter
1_4889593_4890091	AT1G14330	AT1G14330	1	4890069	4892332	-	2241	3UTR
1_4892990_4893982	AT1G14330	AT1G14330	1	4890069	4892332	-	658	Promoter
1_4894415_4895180	AT1G14330	AT1G14330	1	4890069	4892332	-	2083	1to5kb
1_4896253_4896477	AT1G14340	AT1G14340	1	4897346	4899035	+	869	Promoter
1_4897168_4897505	AT1G14340	AT1G14340	1	4897346	4899035	+	159	Promoter
1_4898973_4899244	AT1G14340	AT1G14340	1	4897346	4899035	+	1627	3UTR
1_4913120_4913332	UTR3	AT1G14360	1	4911093	4913167	-	47	Promoter
1_4921505_4921904	IQD28	AT1G14380	1	4918010	4921682	-	177	Promoter
1_4922279_4922511	IQD28	AT1G14380	1	4918010	4921682	-	597	Promoter
1_4930808_4931088	WHY1	AT1G14410	1	4928921	4931080	-	8	Promoter
1_4947453_4947694	AT1G14450	AT1G14450	1	4946192	4947670	-	24	Promoter
1_4959323_4959628	AT1G14490	AT1G14490	1	4958445	4959529	-	99	Promoter
1_4965819_4966147	AL7	AT1G14510	1	4961594	4964515	-	1304	1to5kb
1_4987551_4987815	AT1G14570	AT1G14570	1	4983489	4987375	+	4062	Intergenic
1_4998574_4998904	AT1G14590	AT1G14590	1	4998767	5000710	-	1806	3UTR
1_5017047_5017495	DECOY	AT1G14620	1	5014675	5016708	-	339	Promoter
1_5022318_5022678	AT1G14630	AT1G14630	1	5019800	5021653	+	2518	Intergenic
1_5027404_5027803	AT1G14650	AT1G14650	1	5027316	5031883	+	88	Intronexonboundary
1_5040616_5040880	AT1G14670	AT1G14670	1	5037576	5040597	+	3040	Intergenic
1_5041987_5042727	AT1G14680	AT1G14680	1	5040754	5041967	+	1233	Intergenic
1_5047657_5048377	HB32	AT1G14687	1	5047782	5048753	+	125	Promoter
1_5048590_5048908	HB32	AT1G14687	1	5047782	5048753	+	808	3UTR
1_5049209_5049409	AT1G14688	AT1G14688	1	5049526	5050983	-	1574	Intergenic
1_5055044_5055594	MAP65-7	AT1G14690	1	5051656	5055299	-	255	Promoter
1_5056234_5057432	MAP65-7	AT1G14690	1	5051656	5055299	-	935	Promoter
1_5065450_5065675	AT1G14710	AT1G14710	1	5061694	5065303	-	147	Promoter
1_5066691_5066896	XTH28	AT1G14720	1	5066525	5068677	-	1781	3UTR
1_5067146_5067608	XTH28	AT1G14720	1	5066525	5068677	-	1069	Intronexonboundary
1_5069521_5070065	XTH28	AT1G14720	1	5066525	5068677	-	844	Promoter
1_5070473_5071254	AT1G14730	AT1G14730	1	5073031	5074798	+	1777	1to5kb
1_5077628_5078025	TTA1	AT1G14740	1	5075179	5077981	-	44	Promoter
1_5078252_5078833	TTA1	AT1G14740	1	5075179	5077981	-	271	Promoter
1_5082483_5082759	SDS	AT1G14750	1	5079226	5082536	-	53	Promoter
1_5088837_5089042	AT1G14770	AT1G14770	1	5086595	5088898	-	61	Promoter
1_5097997_5098268	RDR1	AT1G14790	1	5093961	5098270	-	2	Intronexonboundary
1_5098391_5098609	RDR1	AT1G14790	1	5093961	5098270	-	121	Promoter
1_5099112_5099358	AT1G14800	AT1G14800	1	5099572	5102558	+	214	Promoter
1_5100595_5100805	AT1G14800	AT1G14800	1	5099572	5102558	+	1023	Intronexonboundary
1_5115552_5115831	MAP70-4	AT1G14840	1	5111701	5115514	-	38	Promoter
1_5126329_5126765	NUDT18	AT1G14860	1	5124670	5126280	+	1659	Intergenic
1_5127336_5127631	PCR2	AT1G14870	1	5128344	5129731	-	2100	Intergenic
1_5135545_5135789	AT1G14890	AT1G14890	1	5136874	5137982	+	1085	1to5kb
1_5139386_5139762	AT1G14910	AT1G14910	1	5139712	5143735	-	3973	3UTR
1_5144302_5144978	AT1G14910	AT1G14910	1	5139712	5143735	-	567	Promoter
1_5146752_5147371	GAI	AT1G14920	1	5148982	5151415	+	1611	1to5kb
1_5147849_5148463	GAI	AT1G14920	1	5148982	5151415	+	519	Promoter
1_5166614_5166959	CPN10	AT1G14980	1	5165489	5166939	-	20	Promoter
1_5168126_5168387	AT1G14990	AT1G14990	1	5166913	5168336	-	51	Promoter
1_5170511_5170772	AT1G15010	AT1G15010	1	5171181	5171956	+	409	Promoter
1_5176233_5176439	QSOX1	AT1G15020	1	5172232	5176479	-	40	5UTR
1_5177320_5177534	AT1G15030	AT1G15030	1	5177480	5180049	+	54	Promoter
1_5186906_5187167	AT1G15060	AT1G15060	1	5183258	5187106	-	61	Promoter
1_5192806_5193303	RHA2A	AT1G15100	1	5193284	5194214	-	911	3UTR
1_5193975_5194196	RHA2A	AT1G15100	1	5193284	5194214	-	18	5UTR
1_5195519_5196203	RHA2A	AT1G15100	1	5193284	5194214	-	1305	1to5kb
1_5197661_5198389	PSS1	AT1G15110	1	5198940	5202315	+	551	Promoter
1_5198885_5199094	PSS1	AT1G15110	1	5198940	5202315	+	55	Promoter
1_5202607_5202890	AT1G15120	AT1G15120	1	5202593	5204494	+	14	Intronexonboundary
1_5212188_5212638	AT1G15140	AT1G15140	1	5210181	5212349	-	161	Promoter
1_5220126_5220325	AT1G15165	AT1G15165	1	5217719	5220113	-	13	Promoter
1_5228045_5228308	AT1G15200	AT1G15200	1	5228300	5231184	-	2876	3UTR
1_5241437_5241873	CCMH	AT1G15220	1	5240029	5241541	-	104	Promoter
1_5243074_5243511	AT1G15240	AT1G15240	1	5243383	5248693	+	128	Promoter
1_5251928_5252518	AT1G15270	AT1G15270	1	5250650	5252121	-	193	Promoter
1_5271923_5272267	AT1G15320	AT1G15320	1	5272256	5274074	-	1807	3UTR
1_5274049_5274517	AT1G15320	AT1G15320	1	5272256	5274074	-	25	Promoter
1_5277439_5278312	AT1G15350	AT1G15350	1	5278027	5279988	-	1676	3UTR
1_5281656_5282028	SHN1	AT1G15360	1	5283268	5284736	+	1240	1to5kb
1_5282251_5282696	SHN1	AT1G15360	1	5283268	5284736	+	572	Promoter
1_5284561_5284813	SHN1	AT1G15360	1	5283268	5284736	+	1293	3UTR
1_5286581_5286964	AT1G15370	AT1G15370	1	5286866	5288640	+	98	Promoter
1_5289966_5290340	GLYI4	AT1G15380	1	5290582	5292582	+	242	Promoter
1_5290527_5290806	GLYI4	AT1G15380	1	5290582	5292582	+	55	Promoter
1_5291362_5291864	GLYI4	AT1G15380	1	5290582	5292582	+	780	Intronexonboundary
1_5294411_5294833	PDF1A	AT1G15390	1	5294629	5295931	+	204	Promoter
1_5296688_5297094	AT1G15400	AT1G15400	1	5295756	5297075	-	19	Promoter
1_5297249_5298221	AT1G15410	AT1G15410	1	5298324	5300927	+	103	Promoter
1_5303310_5303618	AT1G15420	AT1G15420	1	5301516	5303522	-	96	Promoter
1_5304042_5304545	AT1G15430	AT1G15430	1	5304098	5306087	+	56	Promoter
1_5309399_5309703	PWP2	AT1G15440	1	5306027	5309558	-	145	Promoter
1_5314037_5314272	BOR4	AT1G15460	1	5309907	5314128	-	91	Promoter
1_5324887_5325350	ATNTT2	AT1G15500	1	5326290	5328875	+	940	Promoter
1_5326181_5326452	ATNTT2	AT1G15500	1	5326290	5328875	+	109	Promoter
1_5339484_5339894	AT1G15530	AT1G15530	1	5339961	5341931	-	2037	Intergenic
1_5341918_5342350	AT1G15530	AT1G15530	1	5339961	5341931	-	13	Promoter
1_5360257_5360496	CYCA2%3B3	AT1G15570	1	5361865	5365559	+	1369	1to5kb
1_5384929_5386108	CENP-C	AT1G15660	1	5381032	5385380	+	3897	Intronexonboundary
1_5386574_5388447	CENP-C	AT1G15660	1	5381032	5385380	+	5542	Intergenic
1_5389114_5389356	AT1G15670	AT1G15670	1	5389952	5391672	+	596	Promoter
1_5389876_5390479	AT1G15670	AT1G15670	1	5389952	5391672	+	76	Promoter
1_5390628_5391257	AT1G15670	AT1G15670	1	5389952	5391672	+	676	3UTR
1_5392693_5393001	AT1G15680	AT1G15680	1	5393407	5394639	+	406	Promoter
1_5396110_5396779	AT1G15680	AT1G15680	1	5393407	5394639	+	2703	Intronexonboundary
1_5397162_5397978	AVP1	AT1G15690	1	5398926	5402733	+	948	Promoter
1_5398537_5399341	AVP1	AT1G15690	1	5398926	5402733	+	389	Promoter
1_5402312_5402641	ATPC2	AT1G15700	1	5402569	5403818	-	1177	3UTR
1_5404167_5404468	AT1G15710	AT1G15710	1	5404130	5405910	+	37	5UTR
1_5410743_5411026	AT1G15740	AT1G15740	1	5410908	5414919	+	118	Promoter
1_5420829_5421063	TPL	AT1G15750	1	5414817	5421033	-	30	Promoter
1_5421218_5421615	TPL	AT1G15750	1	5414817	5421033	-	185	Promoter
1_5423130_5423902	AT1G15757	AT1G15757	1	5424242	5424579	-	677	Intergenic
1_5425447_5425732	AT1G15760	AT1G15760	1	5425616	5426666	+	116	Promoter
1_5442292_5442718	AT1G15800	AT1G15800	1	5441072	5443911	-	1193	Intron
1_5443469_5444022	AT1G15800	AT1G15800	1	5441072	5443911	-	111	Promoter
1_5444198_5444549	AT1G15810	AT1G15810	1	5444220	5446564	+	22	Promoter
1_5447121_5447473	LHCB6	AT1G15820	1	5446462	5447880	-	407	Intronexonboundary
1_5454710_5454940	AT1G15860	AT1G15860	1	5454766	5457022	+	56	Promoter
1_5469077_5469455	FDM1	AT1G15910	1	5465251	5469180	+	3826	3UTR
1_5470798_5471480	AT1G15930	AT1G15930	1	5471316	5473048	+	164	Promoter
1_5481279_5481502	NRAMP6	AT1G15960	1	5481665	5486105	-	4603	Intergenic
1_5488792_5489218	PnsB1	AT1G15980	1	5489145	5491363	+	73	Promoter
1_5494441_5494707	AT1G16000	AT1G16000	1	5494533	5495359	+	92	Promoter
1_5504502_5504701	Hsp70b	AT1G16030	1	5501966	5504535	-	33	Promoter
1_5531980_5532261	WAKL4	AT1G16150	1	5532298	5535060	+	37	Promoter
1_5539665_5540518	AT1G16170	AT1G16170	1	5538666	5540002	-	337	Promoter
1_5542876_5543323	AT1G16180	AT1G16180	1	5540050	5542902	+	2826	3UTR
1_5547397_5547829	AT1G16210	AT1G16210	1	5546099	5547753	-	76	Promoter
1_5556811_5557094	SYP51	AT1G16240	1	5554843	5556844	-	33	Promoter
1_5562895_5563104	AT1G16270	AT1G16270	1	5562861	5568368	+	34	Intronexonboundary
1_5573961_5574415	AT1G16290	AT1G16290	1	5570753	5573958	-	3	Promoter
1_5587407_5587709	ATKDSA2	AT1G16340	1	5587722	5590761	-	3052	Intergenic
1_5590827_5591081	ATKDSA2	AT1G16340	1	5587722	5590761	-	66	Promoter
1_5593111_5593473	AT1G16350	AT1G16350	1	5590756	5593098	+	2355	Intergenic
1_5614148_5614693	AT1G16430	AT1G16430	1	5614593	5615660	+	100	Promoter
1_5634215_5634608	MYB58	AT1G16490	1	5629655	5631088	-	3127	1to5kb
1_5637957_5638269	AT1G16500	AT1G16500	1	5638779	5640202	+	510	Promoter
1_5642166_5642500	AT1G16500	AT1G16500	1	5638779	5640202	+	3387	Intron
1_5648643_5648885	AT1G16520	AT1G16520	1	5648636	5651167	+	7	5UTR
1_5685138_5685597	AT1G16630	AT1G16630	1	5681973	5684909	-	229	Promoter
1_5686250_5686638	AT1G16640	AT1G16640	1	5686525	5687727	+	113	Promoter
1_5702062_5702270	AT1G16680	AT1G16680	1	5702153	5705892	+	91	Promoter
1_5709644_5709860	AT1G16700	AT1G16700	1	5709624	5712043	+	20	Intronexonboundary
1_5722718_5723041	HAC12	AT1G16710	1	5713794	5722614	+	8924	Intergenic
1_5727291_5727744	UP6	AT1G16730	1	5726368	5727406	-	115	Promoter
1_5732666_5732899	AT1G16750	AT1G16750	1	5729057	5731934	-	732	Promoter
1_5738699_5739000	AT1G16770	AT1G16770	1	5737839	5739377	+	860	Exon
1_5744399_5744703	AT1G16790	AT1G16790	1	5744335	5745259	+	64	5UTR
1_5755390_5755702	AT1G16800	AT1G16800	1	5744484	5755468	-	78	Promoter
1_5758280_5758862	AT1G16825	AT1G16825	1	5758855	5760509	+	7	Promoter
1_5766536_5766915	AT1G16860	AT1G16860	1	5767300	5770602	+	385	Promoter
1_5767131_5767567	AT1G16860	AT1G16860	1	5767300	5770602	+	169	Promoter
1_5773115_5773830	AT1G16870	AT1G16870	1	5770732	5773322	-	207	Promoter
1_5782423_5782920	EBS3	AT1G16900	1	5779008	5782433	-	10	Promoter
1_5784972_5785249	LSH8	AT1G16910	1	5785003	5785959	+	31	Promoter
1_5786257_5786484	AT1G16916	AT1G16916	1	5786557	5787329	-	845	Intergenic
1_5789197_5789405	RABA1b	AT1G16920	1	5787150	5789312	-	93	Promoter
1_5831606_5832110	CYP72C1	AT1G17060	1	5832094	5835488	-	3378	3UTR
1_5842825_5843205	AT1G17090	AT1G17090	1	5842168	5844367	-	1162	5UTR
1_5844176_5844743	HBP1	AT1G17100	1	5844646	5845661	+	97	Promoter
1_5850677_5850964	UBP15	AT1G17110	1	5845675	5850934	-	30	Promoter
1_5851566_5852042	CAT8	AT1G17120	1	5851860	5853987	+	182	Promoter
1_5854004_5854303	CAT8	AT1G17120	1	5851860	5853987	+	2144	Intergenic
1_5873354_5873687	GSTU25	AT1G17180	1	5872024	5873124	+	1330	Intergenic
1_5874942_5875285	GSTU26	AT1G17190	1	5875295	5876620	+	10	Promoter
1_5875909_5876171	GSTU26	AT1G17190	1	5875295	5876620	+	614	Intronexonboundary
1_5895658_5895892	RTFL11	AT1G17235	1	5895351	5896250	+	307	3UTR
1_5916650_5916856	UBC34	AT1G17280	1	5916832	5920393	-	3537	3UTR
1_5920036_5920423	UBC34	AT1G17280	1	5916832	5920393	-	30	Promoter
1_5921953_5922213	AlaAT1	AT1G17290	1	5922332	5926400	+	119	Promoter
1_5922575_5922929	AlaAT1	AT1G17290	1	5922332	5926400	+	243	Intronexonboundary
1_5944970_5945772	AT1G17350	AT1G17350	1	5941549	5944465	+	3421	Intergenic
1_5954984_5955352	UBP1B	AT1G17370	1	5951542	5955143	-	159	Promoter
1_5957732_5958502	JAZ5	AT1G17380	1	5955155	5957511	-	221	Promoter
1_5963785_5964003	AT1G17400	AT1G17400	1	5960471	5962481	-	1304	1to5kb
1_5975540_5975753	LOX3	AT1G17420	1	5977323	5981521	+	1570	1to5kb
1_5977151_5977360	LOX3	AT1G17420	1	5977323	5981521	+	37	Promoter
1_5987736_5988026	EER4	AT1G17440	1	5983984	5987934	-	92	Promoter
1_5998560_5998962	ELF4-L4	AT1G17455	1	5997057	5998599	+	1503	3UTR
1_6002721_6003029	TRFL3	AT1G17460	1	5998765	6002732	+	3956	3UTR
1_6008296_6008570	IQD7	AT1G17480	1	6006413	6008501	-	69	Promoter
1_6015009_6015444	AT1G17500	AT1G17500	1	6017808	6023503	+	2364	1to5kb
1_6017064_6017435	AT1G17500	AT1G17500	1	6017808	6023503	+	373	Promoter
1_6027325_6027730	TIM23-1	AT1G17530	1	6027487	6029115	+	162	Promoter
1_6033815_6034564	AT1G17545	AT1G17545	1	6033109	6033908	+	706	Exon
1_6049286_6049795	MYA1	AT1G17580	1	6039250	6049685	+	10036	3UTR
1_6061207_6061419	AT1G17615	AT1G17615	1	6059389	6060851	+	1818	Intergenic
1_6061885_6062365	AT1G17620	AT1G17620	1	6061895	6063362	+	10	Promoter
1_6092287_6092551	PEPC1	AT1G17710	1	6090405	6092027	-	260	Promoter
1_6098224_6098683	ATB BETA	AT1G17720	1	6093185	6098443	-	219	Promoter
1_6099076_6099296	VPS46.1	AT1G17730	1	6099039	6100397	+	37	5UTR
1_6140060_6140288	AT1G17830	AT1G17830	1	6135751	6138500	-	1560	1to5kb
1_6142206_6142942	ABCG11	AT1G17840	1	6142402	6146521	+	196	Promoter
1_6153861_6154208	GER2	AT1G17890	1	6154264	6155804	-	1596	Intergenic
1_6155710_6155966	GER2	AT1G17890	1	6154264	6155804	-	94	Promoter
1_6174440_6175212	AT1G17940	AT1G17940	1	6169285	6173273	-	1167	1to5kb
1_6175514_6176755	MYB52	AT1G17950	1	6177481	6179289	+	726	Promoter
1_6177113_6177499	MYB52	AT1G17950	1	6177481	6179289	+	18	Promoter
1_6178877_6179623	MYB52	AT1G17950	1	6177481	6179289	+	1396	Intronexonboundary
1_6179707_6180298	MYB52	AT1G17950	1	6177481	6179289	+	2226	Intergenic
1_6183613_6184579	AT1G17970	AT1G17970	1	6184717	6187499	+	138	Promoter
1_6204220_6204491	AT1G18020	AT1G18020	1	6202235	6204234	+	1985	3UTR
1_6218235_6218567	AT1G18070	AT1G18070	1	6213651	6218384	-	149	Promoter
1_6219286_6219840	AT1G18070	AT1G18070	1	6213651	6218384	-	902	Promoter
1_6221907_6222436	ATARCA	AT1G18080	1	6222201	6224242	+	235	Promoter
1_6240105_6240353	LAC1	AT1G18140	1	6238839	6241510	-	1157	Intronexonboundary
1_6247811_6248327	ATMPK8	AT1G18150	1	6244298	6247830	-	19	Promoter
1_6267174_6267601	RABA6b	AT1G18200	1	6265416	6267076	-	98	Promoter
1_6268666_6268871	AT1G18210	AT1G18210	1	6266609	6268939	-	68	5UTR
1_6293766_6294223	AT1G18280	AT1G18280	1	6294160	6295372	+	63	Promoter
1_6298913_6299242	NUDT4	AT1G18300	1	6299669	6301139	+	427	Promoter
1_6303975_6304338	AT1G18310	AT1G18310	1	6301200	6303956	-	19	Promoter
1_6307805_6308373	EPR1	AT1G18330	1	6305814	6308243	-	130	Promoter
1_6311252_6311518	AT1G18340	AT1G18340	1	6311443	6313931	-	2413	3UTR
1_6313920_6314164	AT1G18340	AT1G18340	1	6311443	6313931	-	11	Promoter
1_6324238_6324457	HIK	AT1G18370	1	6319450	6324378	-	79	Promoter
1_6326836_6327087	AT1G18390	AT1G18390	1	6325536	6330179	+	1300	Intron
1_6330343_6330817	AT1G18390	AT1G18390	1	6325536	6330179	+	4807	Intergenic
1_6331018_6331412	BEE1	AT1G18400	1	6331398	6333856	+	14	Promoter
1_6332437_6332886	BEE1	AT1G18400	1	6331398	6333856	+	1039	Intronexonboundary
1_6333235_6333819	BEE1	AT1G18400	1	6331398	6333856	+	1837	Intronexonboundary
1_6334186_6334516	BEE1	AT1G18400	1	6331398	6333856	+	2788	Intergenic
1_6345613_6346051	AT1G18420	AT1G18420	1	6343330	6345689	+	2283	Intronexonboundary
1_6352253_6352472	AT1G18460	AT1G18460	1	6352325	6356113	+	72	Promoter
1_6359423_6359710	AT1G18470	AT1G18470	1	6355695	6360344	-	634	Intronexonboundary
1_6361221_6361888	SLP2	AT1G18480	1	6361586	6363061	+	302	Promoter
1_6372374_6373218	TET16	AT1G18510	1	6373265	6374090	+	47	Promoter
1_6373760_6374392	TET16	AT1G18510	1	6373265	6374090	+	495	Intronexonboundary
1_6378534_6378759	AT1G18540	AT1G18540	1	6376639	6378580	-	46	Promoter
1_6380712_6380932	AT1G18550	AT1G18550	1	6381441	6384587	-	3655	Intergenic
1_6384557_6384951	AT1G18550	AT1G18550	1	6381441	6384587	-	30	Promoter
1_6385247_6385513	AT1G18560	AT1G18560	1	6385186	6388180	+	61	5UTR
1_6400302_6400568	RBL12	AT1G18600	1	6400282	6402794	+	20	5UTR
1_6426334_6426586	IBS1	AT1G18670	1	6426709	6431093	-	4507	Intergenic
1_6443629_6443867	AT1G18700	AT1G18700	1	6437474	6444076	+	6155	Intronexonboundary
1_6448372_6448827	MYB47	AT1G18710	1	6450585	6453263	+	1758	1to5kb
1_6449137_6449443	MYB47	AT1G18710	1	6450585	6453263	+	1142	1to5kb
1_6457731_6458099	AT1G18720	AT1G18720	1	6457775	6460405	-	2306	Intronexonboundary
1_6459410_6460608	AT1G18720	AT1G18720	1	6457775	6460405	-	203	Promoter
1_6461568_6462011	PnsB4	AT1G18730	1	6460403	6462344	+	1165	Intronexonboundary
1_6463472_6464194	AT1G18740	AT1G18740	1	6463849	6465476	+	345	Promoter
1_6466490_6466765	AGL65	AT1G18750	1	6466667	6469984	+	98	Promoter
1_6483813_6484170	NRP2	AT1G18800	1	6481113	6483646	-	167	Promoter
1_6494532_6494854	AT1G18830	AT1G18830	1	6489233	6494634	+	5299	3UTR
1_6499087_6499309	IQD30	AT1G18840	1	6500803	6504567	-	5258	Intergenic
1_6511641_6511845	WRKY61	AT1G18860	1	6508797	6511397	+	2844	Intergenic
1_6528152_6528763	AT1G18900	AT1G18900	1	6528984	6532697	+	221	Promoter
1_6555863_6556126	GLP4	AT1G18970	1	6554496	6555610	-	253	Promoter
1_6556646_6557058	AT1G18980	AT1G18980	1	6557181	6558115	-	1057	Intergenic
1_6562687_6562979	AT1G19000	AT1G19000	1	6560491	6562791	-	104	Promoter
1_6579247_6579595	ARR7	AT1G19050	1	6577833	6579314	-	67	Promoter
1_6580173_6581181	ARR7	AT1G19050	1	6577833	6579314	-	859	Promoter
1_6584054_6584278	TTN10	AT1G19080	1	6584241	6586517	+	37	Promoter
1_6601584_6602158	AT1G19110	AT1G19110	1	6602105	6606028	+	53	Promoter
1_6613188_6613774	Lhca6	AT1G19150	1	6612630	6613972	+	558	Intronexonboundary
1_6620528_6621502	JAZ1	AT1G19180	1	6621777	6623668	+	275	Promoter
1_6621695_6622209	JAZ1	AT1G19180	1	6621777	6623668	+	82	Promoter
1_6627731_6628094	AT1G19210	AT1G19210	1	6626794	6627688	-	43	Promoter
1_6632839_6633217	ARF19	AT1G19220	1	6627683	6633133	-	84	Promoter
1_6633452_6633765	ARF19	AT1G19220	1	6627683	6633133	-	319	Promoter
1_6634606_6634810	ARF19	AT1G19220	1	6627683	6633133	-	1473	1to5kb
1_6638768_6639456	AT1G19230	AT1G19230	1	6643942	6649375	+	4486	1to5kb
1_6675860_6676184	AT1G19310	AT1G19310	1	6676210	6677680	-	1496	Intergenic
1_6682266_6682508	AT1G19330	AT1G19330	1	6680423	6683559	-	1051	Intron
1_6682936_6683230	AT1G19330	AT1G19330	1	6680423	6683559	-	329	Intronexonboundary
1_6683368_6684800	AT1G19330	AT1G19330	1	6680423	6683559	-	191	Promoter
1_6686901_6687401	AT1G19340	AT1G19340	1	6684467	6687116	+	2434	3UTR
1_6688273_6689094	BES1	AT1G19350	1	6688463	6691216	+	190	Promoter
1_6692404_6692764	AT1G19370	AT1G19370	1	6692724	6695055	-	2291	3UTR
1_6695044_6695321	AT1G19370	AT1G19370	1	6692724	6695055	-	11	Promoter
1_6696688_6697159	AT1G19380	AT1G19380	1	6697874	6698858	+	715	Promoter
1_6698495_6698742	AT1G19380	AT1G19380	1	6697874	6698858	+	621	Intronexonboundary
1_6727779_6728264	AT1G19430	AT1G19430	1	6724413	6728075	-	189	Promoter
1_6737711_6738016	AT1G19460	AT1G19460	1	6738484	6739734	+	468	Promoter
1_6738190_6738483	AT1G19460	AT1G19460	1	6738484	6739734	+	1	Promoter
1_6744278_6744483	AT1G19480	AT1G19480	1	6744353	6746635	+	75	Promoter
1_6746383_6746872	AT1G19485	AT1G19485	1	6746778	6751609	+	94	Promoter
1_6754181_6754761	AT1G19500	AT1G19500	1	6754665	6755684	-	923	3UTR
1_6765439_6765881	AT1G19540	AT1G19540	1	6765653	6768290	+	214	Promoter
1_6774417_6774666	GAMMA CA1	AT1G19580	1	6774683	6777568	+	17	Promoter
1_6781193_6781412	AT1G19600	AT1G19600	1	6778887	6781222	+	2306	3UTR
1_6788480_6788912	JMT	AT1G19640	1	6788885	6791919	-	3007	3UTR
1_6789225_6789464	JMT	AT1G19640	1	6788885	6791919	-	2455	Intronexonboundary
1_6791227_6795325	JMT	AT1G19640	1	6788885	6791919	-	692	Promoter
1_6795577_6796729	AT1G19650	AT1G19650	1	6796137	6799764	-	3035	Intronexonboundary
1_6797331_6797869	AT1G19650	AT1G19650	1	6796137	6799764	-	1895	Intronexonboundary
1_6802581_6803262	CLH1	AT1G19670	1	6803486	6805092	-	1830	Intergenic
1_6812181_6814042	AT1G19710	AT1G19710	1	6814704	6816876	+	662	Promoter
1_6832199_6832533	PUP14	AT1G19770	1	6832325	6833837	+	126	Promoter
1_6846173_6846502	ABCI14	AT1G19800	1	6846338	6848128	+	164	Promoter
1_6860156_6860824	AT1G19835	AT1G19835	1	6855899	6860563	-	261	Promoter
1_6861222_6862434	AT1G19835	AT1G19835	1	6855899	6860563	-	659	Promoter
1_6862584_6863083	AT1G19835	AT1G19835	1	6855899	6860563	-	2021	1to5kb
1_6863666_6863929	AT1G19835	AT1G19835	1	6855899	6860563	-	3103	1to5kb
1_6864785_6865129	AT1G19835	AT1G19835	1	6855899	6860563	-	4222	1to5kb
1_6867151_6867456	AT1G19840	AT1G19840	1	6872275	6873358	-	5902	Intergenic
1_6867700_6868244	AT1G19840	AT1G19840	1	6872275	6873358	-	5114	Intergenic
1_6868769_6870097	AT1G19840	AT1G19840	1	6872275	6873358	-	3261	Intergenic
1_6870228_6870655	AT1G19840	AT1G19840	1	6872275	6873358	-	2703	Intergenic
1_6871722_6871923	AT1G19840	AT1G19840	1	6872275	6873358	-	1435	Intergenic
1_6873044_6873619	AT1G19840	AT1G19840	1	6872275	6873358	-	261	Promoter
1_6874886_6876129	AT1G19840	AT1G19840	1	6872275	6873358	-	1528	1to5kb
1_6883735_6883934	MP	AT1G19850	1	6886669	6891404	+	2735	1to5kb
1_6894656_6894999	iqd32	AT1G19870	1	6895009	6898818	-	3819	Intergenic
1_6898485_6898849	iqd32	AT1G19870	1	6895009	6898818	-	31	Promoter
1_6899466_6899852	AT1G19880	AT1G19880	1	6900337	6904155	-	4303	Intergenic
1_6903901_6904357	AT1G19880	AT1G19880	1	6900337	6904155	-	202	Promoter
1_6904627_6904838	MGH3	AT1G19890	1	6904963	6906028	+	125	Promoter
1_6916553_6917033	AT1G19930	AT1G19930	1	6917020	6918138	+	13	Promoter
1_6932668_6933086	AT1G19980	AT1G19980	1	6933015	6935053	+	71	Promoter
1_6939551_6939792	TUB5	AT1G20010	1	6937719	6940832	-	1040	Intron
1_6946314_6946979	AT1G20030	AT1G20030	1	6945425	6947344	+	889	Intronexonboundary
1_6956253_6956460	AT1G20060	AT1G20060	1	6950393	6956400	-	60	Promoter
1_6957952_6958277	AT1G20070	AT1G20070	1	6958010	6959148	-	871	3UTR
1_6959342_6959662	AT1G20070	AT1G20070	1	6958010	6959148	-	194	Promoter
1_6964788_6965476	SYTB	AT1G20080	1	6962030	6965443	+	2758	Intronexonboundary
1_6965607_6966035	SYTB	AT1G20080	1	6962030	6965443	+	3577	Intergenic
1_6966865_6967068	ROP2	AT1G20090	1	6966842	6969009	+	23	5UTR
1_6970788_6971506	AT1G20110	AT1G20110	1	6971424	6975130	+	82	Promoter
1_6994730_6995306	ATSBT5.2	AT1G20160	1	6990642	6993989	-	741	Promoter
1_7022964_7023373	AT1G20270	AT1G20270	1	7020664	7023162	-	198	Promoter
1_7031692_7032263	AT1G20300	AT1G20300	1	7029629	7031535	+	2063	Intergenic
1_7041394_7042010	DRT112	AT1G20340	1	7042046	7043392	-	1382	Intergenic
1_7043171_7043536	TIM17-1	AT1G20350	1	7043628	7044592	+	92	Promoter
1_7053697_7054259	AT1G20370	AT1G20370	1	7051577	7053745	-	48	Promoter
1_7059977_7060289	AT1G20380	AT1G20380	1	7061442	7065242	+	1153	1to5kb
1_7061815_7062194	AT1G20380	AT1G20380	1	7061442	7065242	+	373	Intronexonboundary
1_7083718_7084085	AT1G20430	AT1G20430	1	7083012	7083910	-	175	Promoter
1_7084175_7084885	COR47	AT1G20440	1	7084409	7086873	-	1988	3UTR
1_7085641_7085933	COR47	AT1G20440	1	7084409	7086873	-	940	5UTR
1_7086471_7087389	COR47	AT1G20440	1	7084409	7086873	-	402	Promoter
1_7088035_7088413	ERD10	AT1G20450	1	7087903	7089606	-	1193	3UTR
1_7089123_7089447	ERD10	AT1G20450	1	7087903	7089606	-	159	5UTR
1_7089812_7090302	ERD10	AT1G20450	1	7087903	7089606	-	206	Promoter
1_7090536_7090845	AT1G20460	AT1G20460	1	7090941	7093442	+	96	Promoter
1_7091034_7091447	AT1G20460	AT1G20460	1	7090941	7093442	+	93	5UTR
1_7093297_7094465	AT1G20460	AT1G20460	1	7090941	7093442	+	2356	Intronexonboundary
1_7096982_7097309	AT1G20490	AT1G20490	1	7097211	7099892	-	2583	3UTR
1_7105784_7106223	OPCL1	AT1G20510	1	7103362	7106121	-	102	Promoter
1_7111696_7111914	AT1G20540	AT1G20540	1	7112611	7115362	+	697	Promoter
1_7112345_7112699	AT1G20540	AT1G20540	1	7112611	7115362	+	88	Promoter
1_7118457_7119188	AT1G20550	AT1G20550	1	7115241	7118331	-	126	Promoter
1_7126587_7126831	AT1G20570	AT1G20570	1	7121853	7126559	-	28	Promoter
1_7128671_7129009	DPMS1	AT1G20575	1	7126747	7128762	-	91	Promoter
1_7139425_7139695	CYCB2%3B3	AT1G20610	1	7134659	7137828	-	1597	1to5kb
1_7143886_7144120	CAT3	AT1G20620	1	7142972	7146540	+	914	5UTR
1_7146479_7146833	CAT3	AT1G20620	1	7142972	7146540	+	3507	3UTR
1_7149914_7150135	CAT1	AT1G20630	1	7146636	7150180	+	3278	3UTR
1_7154353_7154578	AT1G20640	AT1G20640	1	7154410	7158287	+	57	Promoter
1_7160735_7161026	ASG5	AT1G20650	1	7157826	7160590	-	145	Promoter
1_7167887_7168421	AT1G20670	AT1G20670	1	7164082	7168041	-	154	Promoter
1_7176431_7176948	AT1G20690	AT1G20690	1	7174438	7176377	+	1993	Intergenic
1_7179200_7179592	HMGB3	AT1G20696	1	7179273	7181574	+	73	Promoter
1_7181926_7182152	HMGB3	AT1G20696	1	7179273	7181574	+	2653	Intergenic
1_7209165_7209434	AT1G20760	AT1G20760	1	7209298	7214993	+	133	Promoter
1_7216672_7217156	SAUL1	AT1G20780	1	7217021	7220842	+	135	Promoter
1_7236793_7237031	AT1G20823	AT1G20823	1	7238693	7239698	+	1662	1to5kb
1_7251576_7251786	XCP2	AT1G20850	1	7252111	7253747	+	325	Promoter
1_7261460_7261791	AT1G20875	AT1G20875	1	7261481	7261681	+	21	Promoter
1_7267253_7267708	AT1G20890	AT1G20890	1	7265794	7267377	-	124	Promoter
1_7271033_7271452	ESC	AT1G20900	1	7272526	7274072	+	1074	1to5kb
1_7281013_7281259	AT1G20910	AT1G20910	1	7276943	7281236	-	23	Promoter
1_7310221_7310453	emb1507	AT1G20960	1	7301599	7310271	-	50	Promoter
1_7322621_7323525	SPL14	AT1G20980	1	7324471	7329441	+	946	Promoter
1_7324314_7324785	SPL14	AT1G20980	1	7324471	7329441	+	157	Promoter
1_7334183_7334825	AT1G20990	AT1G20990	1	7330256	7332100	-	2083	1to5kb
1_7335366_7336441	AT1G21000	AT1G21000	1	7337605	7339452	+	1164	1to5kb
1_7336745_7337254	AT1G21000	AT1G21000	1	7337605	7339452	+	351	Promoter
1_7338650_7338934	AT1G21000	AT1G21000	1	7337605	7339452	+	1045	Intronexonboundary
1_7339426_7339727	AT1G21000	AT1G21000	1	7337605	7339452	+	1821	Intronexonboundary
1_7342048_7342365	AT1G21000	AT1G21000	1	7337605	7339452	+	4443	Intron
1_7366033_7366294	AT1G21050	AT1G21050	1	7366590	7368203	+	296	Promoter
1_7374118_7374434	AT1G21065	AT1G21065	1	7374115	7375789	+	3	Intronexonboundary
1_7382399_7382669	AT1G21080	AT1G21080	1	7378538	7382661	-	8	Promoter
1_7405858_7406269	AT1G21150	AT1G21150	1	7406218	7407870	-	1601	3UTR
1_7420766_7421267	AT1G21200	AT1G21200	1	7421148	7423673	+	119	Promoter
1_7442977_7443345	WAK1	AT1G21250	1	7439171	7442113	+	3806	Intergenic
1_7448397_7448669	WAK2	AT1G21270	1	7444749	7448483	+	3648	3UTR
1_7460929_7461299	AT1G21320	AT1G21320	1	7462327	7466164	-	4865	Intergenic
1_7481686_7482314	GLTP2	AT1G21360	1	7481184	7483513	+	502	Intronexonboundary
1_7488640_7489028	emb2170	AT1G21390	1	7489046	7490803	-	1775	Intergenic
1_7491190_7491434	emb2170	AT1G21390	1	7489046	7490803	-	387	Promoter
1_7494010_7494417	AT1G21400	AT1G21400	1	7493213	7496741	+	797	5UTR
1_7496420_7496794	AT1G21400	AT1G21400	1	7493213	7496741	+	3207	3UTR
1_7504044_7504633	AT1G21440	AT1G21440	1	7502082	7504275	-	231	Promoter
1_7506405_7506611	SCL1	AT1G21450	1	7508701	7511801	+	2090	1to5kb
1_7508911_7509110	SCL1	AT1G21450	1	7508701	7511801	+	210	Intronexonboundary
1_7513898_7514336	SWEET1	AT1G21460	1	7511750	7513481	-	417	Promoter
1_7518106_7518826	AT1G21480	AT1G21480	1	7518946	7521552	-	2726	Intergenic
1_7521445_7521723	AT1G21480	AT1G21480	1	7518946	7521552	-	107	Promoter
1_7547025_7547738	AT1G21530	AT1G21530	1	7545149	7546988	-	37	Promoter
1_7547979_7548254	AT1G21540	AT1G21540	1	7548450	7550741	-	2487	Intergenic
1_7554619_7554827	AT1G21560	AT1G21560	1	7554671	7557112	+	52	Promoter
1_7565676_7565963	AT1G21580	AT1G21580	1	7557140	7565914	-	49	Promoter
1_7570340_7571081	PTAC6	AT1G21600	1	7570845	7573847	-	2766	3UTR
1_7587452_7587685	AT1G21630	AT1G21630	1	7581008	7588153	+	6444	Exon
1_7588501_7588719	NADK2	AT1G21640	1	7588414	7592890	+	87	5UTR
1_7609481_7609761	AT1G21660	AT1G21660	1	7605620	7609223	+	3861	Intergenic
1_7610275_7610491	AT1G21670	AT1G21670	1	7610241	7612721	+	34	5UTR
1_7629340_7629940	AT1G21722	AT1G21722	1	7628456	7629364	+	884	3UTR
1_7630133_7630352	AT1G21730	AT1G21730	1	7630107	7636658	+	26	5UTR
1_7639007_7639384	AT1G21740	AT1G21740	1	7640906	7645240	+	1522	1to5kb
1_7640030_7640297	AT1G21740	AT1G21740	1	7640906	7645240	+	609	Promoter
1_7641185_7641431	AT1G21738	AT1G21738	1	7640992	7641225	-	40	Promoter
1_7645554_7645852	PDIL1-1	AT1G21750	1	7645610	7648855	+	56	Promoter
1_7653873_7654386	AT1G21780	AT1G21780	1	7651882	7654014	+	1991	3UTR
1_7659807_7661601	AT1G21810	AT1G21810	1	7656319	7659167	-	640	Promoter
1_7662426_7662853	AT1G21830	AT1G21830	1	7660947	7662725	-	128	Promoter
1_7663733_7664368	AT1G21830	AT1G21830	1	7660947	7662725	-	1008	1to5kb
1_7664662_7665372	AT1G21835	AT1G21835	1	7665664	7665936	+	292	Promoter
1_7680079_7680515	LYM1	AT1G21880	1	7680390	7682641	+	125	Promoter
1_7687810_7688019	UMAMIT19	AT1G21890	1	7682584	7685662	-	2148	1to5kb
1_7692362_7692596	p24delta5	AT1G21900	1	7690802	7692459	-	97	Promoter
1_7699014_7699615	DREB26	AT1G21910	1	7696427	7697831	+	2587	Intergenic
1_7700086_7700333	DREB26	AT1G21910	1	7696427	7697831	+	3659	Intergenic
1_7704001_7704322	AT1G21920	AT1G21920	1	7704173	7706254	-	1932	3UTR
1_7705984_7706482	AT1G21920	AT1G21920	1	7704173	7706254	-	228	Promoter
1_7707234_7708001	AT1G21920	AT1G21920	1	7704173	7706254	-	980	Promoter
1_7708357_7708678	AT1G21925	AT1G21925	1	7710423	7710725	-	2047	Intergenic
1_7731296_7731773	LEC1	AT1G21970	1	7727577	7729649	-	1647	1to5kb
1_7732231_7732587	PIP5K1	AT1G21980	1	7734661	7738772	+	2074	1to5kb
1_7733825_7734134	PIP5K1	AT1G21980	1	7734661	7738772	+	527	Promoter
1_7734428_7734787	PIP5K1	AT1G21980	1	7734661	7738772	+	126	Promoter
1_7739770_7740210	AT1G21990	AT1G21990	1	7740530	7742106	-	1896	Intergenic
1_7760522_7760795	AT1G22030	AT1G22030	1	7759077	7760929	-	134	5UTR
1_7771437_7771829	MUB6	AT1G22050	1	7771659	7773154	+	170	Promoter
1_7781282_7781689	AT1G22060	AT1G22060	1	7773063	7781539	-	150	Promoter
1_7782464_7782673	AT1G22060	AT1G22060	1	7773063	7781539	-	925	Promoter
1_7785029_7785442	AT1G22065	AT1G22065	1	7785708	7786477	+	266	Promoter
1_7788154_7788854	TGA3	AT1G22070	1	7789133	7792139	+	279	Promoter
1_7789184_7789562	TGA3	AT1G22070	1	7789133	7792139	+	51	Intronexonboundary
1_7792101_7792411	TGA3	AT1G22070	1	7789133	7792139	+	2968	3UTR
1_7823080_7823279	AT1G22160	AT1G22160	1	7823066	7823971	+	14	5UTR
1_7824649_7825266	AT1G22160	AT1G22160	1	7823066	7823971	+	1583	Intergenic
1_7830314_7830566	AT1G22180	AT1G22180	1	7828326	7830424	-	110	Promoter
1_7832682_7833007	AT1G22180	AT1G22180	1	7828326	7830424	-	2258	1to5kb
1_7844121_7844445	TPPC	AT1G22210	1	7841432	7844056	+	2689	Intergenic
1_7872538_7873047	ZYP1b	AT1G22275	1	7867067	7872715	+	5471	Intronexonboundary
1_7873479_7873730	PAPP2C	AT1G22280	1	7873867	7876018	+	137	Promoter
1_7875669_7875931	PAPP2C	AT1G22280	1	7873867	7876018	+	1802	3UTR
1_7884085_7884534	MBD8	AT1G22310	1	7881503	7883824	-	261	Promoter
1_7909668_7910035	AT1G22410	AT1G22410	1	7911843	7915004	+	1808	1to5kb
1_7910464_7910764	AT1G22410	AT1G22410	1	7911843	7915004	+	1079	1to5kb
1_7911760_7912091	AT1G22410	AT1G22410	1	7911843	7915004	+	83	Promoter
1_7912829_7914429	AT1G22410	AT1G22410	1	7911843	7915004	+	986	Intronexonboundary
1_7925089_7925476	AT1G22440	AT1G22440	1	7922276	7925097	+	2813	3UTR
1_7930437_7930706	AT1G22460	AT1G22460	1	7927287	7930657	-	49	Promoter
1_7933974_7934410	AT1G22480	AT1G22480	1	7933973	7935382	-	972	3UTR
1_7954366_7954693	AT1G22520	AT1G22520	1	7952974	7954546	-	147	Promoter
1_7962368_7962576	AT1G22540	AT1G22540	1	7963813	7966436	+	1237	1to5kb
1_7991013_7991817	AT1G22600	AT1G22600	1	7987141	7989217	-	1796	1to5kb
1_7992784_7993086	ATSAC1	AT1G22620	1	7994166	8002989	-	9903	Intergenic
1_7993825_7994037	ATSAC1	AT1G22620	1	7994166	8002989	-	8952	Intergenic
1_8004529_8004857	AT1G22630	AT1G22630	1	8003223	8004304	+	1306	Intergenic
1_8005115_8005660	MYB3	AT1G22640	1	8006064	8007465	+	404	Promoter
1_8005777_8006372	MYB3	AT1G22640	1	8006064	8007465	+	287	Promoter
1_8006927_8007288	MYB3	AT1G22640	1	8006064	8007465	+	863	3UTR
1_8007559_8008199	MYB3	AT1G22640	1	8006064	8007465	+	1495	Intergenic
1_8008707_8009125	MYB3	AT1G22640	1	8006064	8007465	+	2643	Intergenic
1_8009449_8009854	MYB3	AT1G22640	1	8006064	8007465	+	3385	Intergenic
1_8010314_8010987	A/N-InvD	AT1G22650	1	8013353	8016150	-	5163	Intergenic
1_8011999_8012277	A/N-InvD	AT1G22650	1	8013353	8016150	-	3873	Intergenic
1_8030147_8030392	AT1G22700	AT1G22700	1	8028158	8030136	-	11	Promoter
1_8060608_8061284	GI	AT1G22770	1	8061751	8067790	+	467	Promoter
1_8076464_8076703	AT1G22830	AT1G22830	1	8075996	8079137	+	468	5UTR
1_8079129_8079351	AT1G22830	AT1G22830	1	8075996	8079137	+	3133	3UTR
1_8097498_8097703	CEL5	AT1G22880	1	8095449	8097790	+	2049	3UTR
1_8098050_8098671	CEL5	AT1G22880	1	8095449	8097790	+	2601	Intergenic
1_8112132_8112696	CSN5A	AT1G22920	1	8109574	8112061	-	71	Promoter
1_8116857_8117510	AT1G22930	AT1G22930	1	8117286	8122151	+	224	Promoter
1_8134293_8134622	AT1G22980	AT1G22980	1	8132396	8134388	-	95	Promoter
1_8136221_8136479	CRF7	AT1G22985	1	8135180	8136034	-	187	Promoter
1_8140976_8141177	HIPP22	AT1G22990	1	8139114	8140233	+	1862	Intergenic
1_8141635_8142184	AT1G23000	AT1G23000	1	8143227	8145174	+	1043	1to5kb
1_8142730_8142968	AT1G23000	AT1G23000	1	8143227	8145174	+	259	Promoter
1_8144781_8147856	AT1G23000	AT1G23000	1	8143227	8145174	+	1554	3UTR
1_8149281_8150094	LPR1	AT1G23010	1	8147118	8149891	+	2163	Intronexonboundary
1_8153204_8153708	FRO3	AT1G23020	1	8149868	8153796	-	88	Intronexonboundary
1_8156519_8156735	AT1G23030	AT1G23030	1	8156504	8159185	+	15	5UTR
1_8164700_8165051	AT1G23040	AT1G23040	1	8164782	8166716	+	82	Promoter
1_8166992_8167362	AT1G23040	AT1G23040	1	8164782	8166716	+	2210	Intergenic
1_8172871_8173164	MDP40	AT1G23060	1	8170693	8173085	-	79	Promoter
1_8176052_8176447	AT1G23070	AT1G23070	1	8173823	8175819	-	233	Promoter
1_8183959_8184410	PIN7	AT1G23080	1	8180189	8183650	-	309	Promoter
1_8192050_8192279	AST91	AT1G23090	1	8184925	8189234	-	2816	1to5kb
1_8193472_8193890	AT1G23100	AT1G23100	1	8195776	8196475	+	1886	1to5kb
1_8224341_8226523	PGM3	AT1G23190	1	8219808	8224547	+	4533	3UTR
1_8226637_8227685	AT1G23200	AT1G23200	1	8227133	8229661	+	496	Promoter
1_8234017_8234484	AT1G23205	AT1G23205	1	8233953	8235019	-	535	3UTR
1_8234602_8234808	AT1G23205	AT1G23205	1	8233953	8235019	-	211	Exon
1_8241906_8242667	AT1G23220	AT1G23220	1	8242369	8244403	+	298	Promoter
1_8262749_8263006	AT1G23280	AT1G23280	1	8260608	8262795	-	46	Promoter
1_8263770_8264007	RPL27AB	AT1G23290	1	8262925	8263739	+	845	Intergenic
1_8265831_8266566	AT1G23300	AT1G23300	1	8262939	8266048	-	217	Promoter
1_8271838_8272239	GGT1	AT1G23310	1	8268385	8272021	-	183	Promoter
1_8296854_8297091	MENG	AT1G23360	1	8295078	8296941	-	87	Promoter
1_8302506_8302946	KNAT6	AT1G23380	1	8297241	8302651	-	145	Promoter
1_8303855_8305102	KNAT6	AT1G23380	1	8297241	8302651	-	1204	1to5kb
1_8305933_8306386	AT1G23390	AT1G23390	1	8308965	8310916	-	4530	Intergenic
1_8306926_8307748	AT1G23390	AT1G23390	1	8308965	8310916	-	3168	Intergenic
1_8308201_8308465	AT1G23390	AT1G23390	1	8308965	8310916	-	2451	Intergenic
1_8309016_8309433	AT1G23390	AT1G23390	1	8308965	8310916	-	1483	3UTR
1_8314694_8314934	AT1G23410	AT1G23410	1	8314853	8315737	+	81	Promoter
1_8321433_8321759	AT1G23440	AT1G23440	1	8321611	8324497	+	148	Promoter
1_8332454_8332974	CSLA03	AT1G23480	1	8332862	8336414	+	112	Promoter
1_8336486_8336785	CSLA03	AT1G23480	1	8332862	8336414	+	3624	Intergenic
1_8350099_8350698	SRO2	AT1G23550	1	8350728	8352791	+	30	Promoter
1_8384716_8385310	AT1G23710	AT1G23710	1	8385188	8386522	+	122	Promoter
1_8386753_8386952	AT1G23710	AT1G23710	1	8385188	8386522	+	1565	Intron
1_8399696_8400137	AT1G23750	AT1G23750	1	8400056	8401550	+	81	Promoter
1_8406311_8406559	AT1G23770	AT1G23770	1	8405214	8406266	-	45	Promoter
1_8408193_8408761	AT1G23780	AT1G23780	1	8406663	8408530	-	231	Promoter
1_8416225_8416454	AT1G23810	AT1G23810	1	8417495	8418566	+	1041	1to5kb
1_8419984_8420294	SPDS1	AT1G23820	1	8420265	8422985	+	29	Promoter
1_8429266_8430300	RSZ21	AT1G23860	1	8427257	8429498	-	232	Promoter
1_8430696_8432315	TPS9	AT1G23870	1	8432179	8435656	+	136	Promoter
1_8480277_8480493	AT1G23965	AT1G23965	1	8480422	8481599	-	1106	3UTR
1_8484207_8484538	AT1G23980	AT1G23980	1	8484703	8486002	-	1464	Intergenic
1_8493286_8493514	AT1G24000	AT1G24000	1	8495908	8496566	-	3052	Intergenic
1_8506788_8507223	AT1G24040	AT1G24040	1	8503777	8506837	-	49	Promoter
1_8517366_8517575	CSLA10	AT1G24070	1	8516166	8519984	-	2409	3UTR
1_8523060_8523281	AT1G24095	AT1G24095	1	8523225	8524929	+	56	Promoter
1_8525061_8525365	UGT74B1	AT1G24100	1	8525334	8527087	-	1722	3UTR
1_8532140_8532458	ARL1	AT1G24120	1	8529064	8532262	-	122	Promoter
1_8533272_8533545	AT1G24130	AT1G24130	1	8534146	8535660	-	2115	Intergenic
1_8558702_8559210	LGT9	AT1G24170	1	8557215	8559066	-	144	Promoter
1_8563281_8563503	IAR4	AT1G24180	1	8560420	8563502	-	1	Promoter
1_8595426_8597777	2024-09-03	AT1G24260	1	8593536	8596123	-	697	Promoter
1_8598518_8599038	AT1G24265	AT1G24265	1	8600391	8603913	+	1353	1to5kb
1_8607399_8608272	AT1G24267	AT1G24267	1	8604022	8607484	-	85	Promoter
1_8608454_8609586	G6PD3	AT1G24280	1	8609338	8612580	+	248	Promoter
1_8661639_8661954	AT1G24440	AT1G24440	1	8661838	8664007	+	116	Promoter
1_8673047_8673365	TNO1	AT1G24460	1	8665874	8672651	+	7173	Intergenic
1_8688137_8688475	BCP1	AT1G24520	1	8688563	8689268	+	88	Promoter
1_8689589_8689953	BCP1	AT1G24520	1	8688563	8689268	+	1026	Intergenic
1_8692480_8693416	None	AT1G24530	1	8692630	8694705	+	150	Promoter
1_8694289_8695155	None	AT1G24530	1	8692630	8694705	+	1659	3UTR
1_8697173_8697573	CYP86C1	AT1G24540	1	8699650	8701458	+	2077	1to5kb
1_8711982_8712211	AT1G24577	AT1G24577	1	8712478	8713225	-	1014	Intergenic
1_8719827_8720160	AT1G24600	AT1G24600	1	8720309	8720721	+	149	Promoter
1_8727033_8727273	ZFP7	AT1G24625	1	8725789	8727212	-	61	Promoter
1_8728322_8728674	ZFP7	AT1G24625	1	8725789	8727212	-	1110	1to5kb
1_8734202_8734447	AT1G24650	AT1G24650	1	8734570	8737315	+	123	Promoter
1_8741621_8741861	THO2	AT1G24706	1	8741836	8755604	+	25	Promoter
1_8763249_8763539	MAP70-2	AT1G24764	1	8759533	8763469	-	70	Promoter
1_8778038_8778267	AT1G24851	AT1G24851	1	8778280	8780257	+	13	Promoter
1_8800560_8800801	AT1G25025	AT1G25025	1	8800808	8801584	+	7	Promoter
1_8814434_8814808	AT1G25097	AT1G25097	1	8811733	8814788	-	20	Promoter
1_8815018_8815280	AT1G25025	AT1G25112	1	8815186	8815962	+	94	Promoter
1_8829342_8829604	AT1G25180	AT1G25180	1	8829564	8831390	+	40	Promoter
1_8839451_8840533	ASB1	AT1G25220	1	8836835	8839609	-	158	Promoter
1_8840622_8840933	AT1G25230	AT1G25230	1	8840203	8842445	-	1512	Intronexonboundary
1_8848255_8848557	IDD16	AT1G25250	1	8849034	8851790	+	477	Promoter
1_8849018_8849228	IDD16	AT1G25250	1	8849034	8851790	+	16	Promoter
1_8852061_8852311	IDD16	AT1G25250	1	8849034	8851790	+	3027	Intron
1_8852625_8853288	AT1G25260	AT1G25260	1	8853534	8855874	-	2586	Intergenic
1_8855796_8856040	AT1G25260	AT1G25260	1	8853534	8855874	-	78	Promoter
1_8882179_8882552	CES	AT1G25330	1	8880267	8882100	-	79	Promoter
1_8882920_8883453	CES	AT1G25330	1	8880267	8882100	-	820	Promoter
1_8899041_8899314	AT1G25370	AT1G25370	1	8897564	8899111	-	70	Promoter
1_8903211_8903459	AT1G25375	AT1G25375	1	8900110	8903428	-	31	Promoter
1_8925135_8925374	CLE43	AT1G25425	1	8922416	8923879	+	2719	Intergenic
1_8933239_8933688	BBX15	AT1G25440	1	8933716	8935544	-	1856	Intergenic
1_8933872_8934208	BBX15	AT1G25440	1	8933716	8935544	-	1336	Intronexonboundary
1_8935054_8935779	BBX15	AT1G25440	1	8933716	8935544	-	235	Promoter
1_8940347_8940678	KCS5	AT1G25450	1	8938387	8940613	-	65	Promoter
1_8947545_8947752	AT1G25480	AT1G25480	1	8948232	8951031	+	480	Promoter
1_8948079_8948584	AT1G25480	AT1G25480	1	8948232	8951031	+	153	Promoter
1_8950850_8951218	RCN1	AT1G25490	1	8951162	8955160	+	56	Promoter
1_8957975_8958204	AT1G25500	AT1G25500	1	8955195	8958132	-	72	Promoter
1_8958904_8959606	AT1G25510	AT1G25510	1	8959087	8961183	-	1577	3UTR
1_8961809_8962327	AT1G25520	AT1G25520	1	8962087	8964564	+	240	Promoter
1_8974378_8974642	PFT1	AT1G25540	1	8969065	8974815	-	173	Intronexonboundary
1_8974828_8975279	PFT1	AT1G25540	1	8969065	8974815	-	13	Promoter
1_8975668_8975984	AT1G25550	AT1G25550	1	8976326	8978305	+	342	Promoter
1_8976205_8976579	AT1G25550	AT1G25550	1	8976326	8978305	+	121	Promoter
1_8978318_8978805	AT1G25550	AT1G25550	1	8976326	8978305	+	1992	Intergenic
1_8980509_8980808	TEM1	AT1G25560	1	8981556	8983314	-	2506	Intergenic
1_8981567_8982156	TEM1	AT1G25560	1	8981556	8983314	-	1158	3UTR
1_8982805_8983368	TEM1	AT1G25560	1	8981556	8983314	-	54	Promoter
1_8983642_8984777	TEM1	AT1G25560	1	8981556	8983314	-	328	Promoter
1_8984878_8986411	TEM1	AT1G25560	1	8981556	8983314	-	1564	1to5kb
1_8986637_8987252	TEM1	AT1G25560	1	8981556	8983314	-	3323	1to5kb
1_8995367_8995607	AT1G25570	AT1G25570	1	8991708	8995617	-	10	Intronexonboundary
1_8995919_8996129	AT1G25570	AT1G25570	1	8991708	8995617	-	302	Promoter
1_8996376_8996685	SOG1	AT1G25580	1	8996714	8999917	-	3232	Intergenic
1_8999824_9000117	SOG1	AT1G25580	1	8996714	8999917	-	93	Promoter
1_9002062_9002280	AT1G25682	AT1G25682	1	9002285	9004762	-	2482	Intergenic
1_9020125_9020475	AT1G26090	AT1G26090	1	9020380	9022769	+	95	Promoter
1_9024023_9024255	AT1G26100	AT1G26100	1	9022542	9024081	-	58	Promoter
1_9027757_9027996	DCP5	AT1G26110	1	9024341	9027955	-	41	Promoter
1_9046862_9047193	AT1G26170	AT1G26170	1	9047292	9054703	-	7510	Intergenic
1_9075212_9075597	Cpn60beta4	AT1G26230	1	9072256	9075350	-	138	Promoter
1_9076637_9076890	AT1G26240	AT1G26240	1	9077874	9079646	-	2756	Intergenic
1_9092335_9092567	AT1G26270	AT1G26270	1	9089469	9092560	-	7	Promoter
1_9099686_9099910	AT1G26300	AT1G26300	1	9095768	9099766	-	80	Promoter
1_9107325_9107528	AT1G26330	AT1G26330	1	9107519	9113747	+	9	Promoter
1_9125560_9125792	AT1G26370	AT1G26370	1	9121443	9125578	-	18	Promoter
1_9151529_9151729	AT1G26460	AT1G26460	1	9151628	9154762	+	99	Promoter
1_9154989_9155238	AT1G26470	AT1G26470	1	9155091	9156370	+	102	Promoter
1_9170940_9171257	AT1G26540	AT1G26540	1	9167549	9170953	-	13	Promoter
1_9184447_9184651	UGD1	AT1G26570	1	9182008	9184393	+	2439	Intergenic
1_9190845_9191360	AT1G26590	AT1G26590	1	9188945	9190896	+	1900	3UTR
1_9199555_9199919	AT1G26620	AT1G26620	1	9195512	9199671	-	116	Promoter
1_9201936_9202561	AT1G26620	AT1G26620	1	9195512	9199671	-	2265	1to5kb
1_9203018_9203375	FBR12	AT1G26630	1	9205800	9207417	+	2425	1to5kb
1_9203834_9204068	FBR12	AT1G26630	1	9205800	9207417	+	1732	1to5kb
1_9246643_9246881	AT1G26740	AT1G26740	1	9244981	9246652	-	9	Promoter
1_9262980_9263302	AT1G26773	AT1G26773	1	9264404	9264580	+	1102	1to5kb
1_9263804_9264019	AT1G26773	AT1G26773	1	9264404	9264580	+	385	Promoter
1_9266997_9267499	AT1G26773	AT1G26773	1	9264404	9264580	+	2593	Intergenic
1_9273309_9273607	AT1G26790	AT1G26790	1	9273684	9275193	-	1586	Intergenic
1_9275087_9275485	AT1G26790	AT1G26790	1	9273684	9275193	-	106	Promoter
1_9286364_9286563	AT1G26800	AT1G26800	1	9285025	9286395	-	31	Promoter
1_9293805_9294030	RNS3	AT1G26820	1	9292446	9293862	-	57	Promoter
1_9298441_9298720	ORC6	AT1G26840	1	9298670	9300800	+	50	Promoter
1_9324506_9325574	RPL10B	AT1G26910	1	9321650	9323028	+	2856	Intronexonboundary
1_9330333_9330623	AT1G26920	AT1G26920	1	9329493	9330612	+	840	3UTR
1_9330825_9331145	AT1G26921	AT1G26921	1	9330944	9331201	-	56	5UTR
1_9332357_9332619	AT1G26921	AT1G26921	1	9330944	9331201	-	1156	1to5kb
1_9338338_9338658	AT1G26930	AT1G26930	1	9336057	9337938	-	400	Promoter
1_9339800_9340369	AT1G26930	AT1G26930	1	9336057	9337938	-	1862	1to5kb
1_9342252_9342456	AT1G26940	AT1G26940	1	9343112	9345323	+	656	Promoter
1_9342826_9343201	AT1G26940	AT1G26940	1	9343112	9345323	+	89	Promoter
1_9354741_9355298	AtHB23	AT1G26960	1	9355827	9357502	+	529	Promoter
1_9391308_9392025	ATHB54	AT1G27045	1	9391609	9393188	+	301	Promoter
1_9393250_9393945	ATHB54	AT1G27045	1	9391609	9393188	+	1641	Intergenic
1_9407561_9408012	AT1G27100	AT1G27100	1	9407085	9411368	-	3356	Intronexonboundary
1_9408668_9408911	AT1G27100	AT1G27100	1	9407085	9411368	-	2457	Intronexonboundary
1_9426454_9426667	GSTU13	AT1G27130	1	9425280	9426897	+	1174	3UTR
1_9428389_9428704	GSTU14	AT1G27140	1	9427804	9428914	+	585	Intronexonboundary
1_9451615_9452005	AT1G27200	AT1G27200	1	9449338	9451768	-	153	Promoter
1_9454301_9454700	AT1G27210	AT1G27210	1	9455277	9458176	-	3476	Intergenic
1_9454939_9455153	AT1G27210	AT1G27210	1	9455277	9458176	-	3023	Intergenic
1_9462033_9462634	AT1G27220	AT1G27220	1	9463806	9465444	+	1172	1to5kb
1_9480967_9481798	AT1G27290	AT1G27290	1	9481405	9482992	+	393	Promoter
1_9482853_9483373	AT1G27290	AT1G27290	1	9481405	9482992	+	1448	3UTR
1_9485781_9486038	NTF2A	AT1G27310	1	9484316	9486002	-	36	Promoter
1_9486374_9486881	HK3	AT1G27320	1	9486889	9492632	+	8	Promoter
1_9487040_9487343	HK3	AT1G27320	1	9486889	9492632	+	151	5UTR
1_9492482_9492976	AT1G27330	AT1G27330	1	9492849	9494382	+	127	Promoter
1_9493931_9494333	AT1G27330	AT1G27330	1	9492849	9494382	+	1082	Intronexonboundary
1_9495305_9495679	LCR	AT1G27340	1	9495344	9498085	+	39	Promoter
1_9499473_9499750	AT1G27350	AT1G27350	1	9498000	9499639	-	111	Promoter
1_9500150_9501007	SPL11	AT1G27360	1	9500892	9504023	+	115	Promoter
1_9501389_9502099	SPL11	AT1G27360	1	9500892	9504023	+	497	5UTR
1_9506866_9508096	SPL10	AT1G27370	1	9505112	9508542	-	446	5UTR
1_9512868_9513132	TOM20-2	AT1G27390	1	9513081	9515050	-	1918	3UTR
1_9514905_9515183	AT1G27400	AT1G27400	1	9515114	9517070	+	69	Promoter
1_9531410_9531630	GUT2	AT1G27440	1	9528967	9531489	-	79	Promoter
1_9567729_9568020	AT1G27540	AT1G27540	1	9565913	9567906	-	114	Promoter
1_9614484_9614786	AT1G27640	AT1G27640	1	9614463	9614906	-	120	Exon
1_9668255_9668655	SAT32	AT1G27760	1	9668508	9671657	+	147	Promoter
1_9696330_9696949	ATCSA-1	AT1G27840	1	9693008	9696546	-	216	Promoter
1_9698291_9698576	AT1G27850	AT1G27850	1	9698298	9703944	+	7	Promoter
1_9715095_9715542	AT1G27890	AT1G27890	1	9714136	9715176	-	81	Promoter
1_9725747_9725960	MAP65-8	AT1G27920	1	9726655	9729848	+	695	Promoter
1_9732447_9732829	AT1G27930	AT1G27930	1	9730959	9733000	-	171	5UTR
1_9739162_9739558	ABCB13	AT1G27940	1	9733430	9738236	-	926	Promoter
1_9748574_9748787	DPL1	AT1G27980	1	9748506	9752769	+	68	5UTR
1_9777847_9778285	BBX13	AT1G28050	1	9775522	9778043	-	196	Promoter
1_9778837_9779143	AT1G28060	AT1G28060	1	9778851	9782907	+	14	Promoter
1_9787780_9787995	AT1G28080	AT1G28080	1	9789691	9791546	+	1696	1to5kb
1_9795637_9795866	AT1G28090	AT1G28090	1	9795718	9799116	+	81	Promoter
1_9800013_9800438	AT1G28100	AT1G28100	1	9801082	9804394	+	644	Promoter
1_9800934_9801190	AT1G28100	AT1G28100	1	9801082	9804394	+	108	Promoter
1_9808974_9809248	SCPL45	AT1G28110	1	9803641	9806899	-	2075	1to5kb
1_9809466_9810325	SCPL45	AT1G28110	1	9803641	9806899	-	2567	1to5kb
1_9810410_9810853	AT1G28120	AT1G28120	1	9812930	9815560	-	4707	Intergenic
1_9815410_9815777	AT1G28120	AT1G28120	1	9812930	9815560	-	150	Promoter
1_9823242_9823561	GH3.17	AT1G28130	1	9825169	9828118	+	1608	1to5kb
1_9824178_9824391	GH3.17	AT1G28130	1	9825169	9828118	+	778	Promoter
1_9827759_9828369	GH3.17	AT1G28130	1	9825169	9828118	+	2590	3UTR
1_9829694_9829961	AT1G28135	AT1G28135	1	9829261	9829584	+	433	Intergenic
1_9832429_9832782	AT1G28140	AT1G28140	1	9831876	9834510	-	1728	3UTR
1_9873704_9874229	AT1G28250	AT1G28250	1	9874247	9875579	+	18	Promoter
1_9879062_9879622	AT1G28265	AT1G28265	1	9879035	9879310	+	27	Intronexonboundary
1_9880264_9880796	AT1G28260	AT1G28260	1	9875527	9879433	-	831	Promoter
1_9884768_9885055	AT1G28280	AT1G28280	1	9885400	9887478	-	2423	Intergenic
1_9885422_9886344	AT1G28280	AT1G28280	1	9885400	9887478	-	1134	3UTR
1_9887437_9888133	AT1G28280	AT1G28280	1	9885400	9887478	-	41	Promoter
1_9892724_9892980	AGP31	AT1G28290	1	9889101	9891015	-	1709	1to5kb
1_9893437_9893646	AGP31	AT1G28290	1	9889101	9891015	-	2422	1to5kb
1_9895960_9896375	LEC2	AT1G28300	1	9896867	9899876	-	3501	Intergenic
1_9925038_9925261	DEG15	AT1G28320	1	9920219	9924488	-	550	Promoter
1_9938069_9938311	LCR31	AT1G28335	1	9937001	9937755	+	1068	Intron
1_9953940_9954301	ERF12	AT1G28360	1	9951762	9953105	+	2178	Intergenic
1_9962489_9962813	NSL1	AT1G28380	1	9963448	9966320	+	635	Promoter
1_9963298_9963665	NSL1	AT1G28380	1	9963448	9966320	+	150	Promoter
1_9990591_9990807	CYP705A24	AT1G28430	1	9992661	9994656	-	3849	Intergenic
1_9996535_9996848	HSL1	AT1G28440	1	9996713	10000455	+	135	Promoter
1_10000060_10000807	HSL1	AT1G28440	1	9996713	10000455	+	3347	3UTR
1_10001026_10001909	HSL1	AT1G28440	1	9996713	10000455	+	4313	Intergenic
1_10014977_10015386	SYP61	AT1G28490	1	10015856	10018047	+	470	Promoter
1_10057790_10058128	AT1G28630	AT1G28630	1	10058456	10063460	-	5332	Intergenic
1_10066717_10066966	AT1G28640	AT1G28640	1	10067563	10069177	-	2211	Intergenic
1_10078041_10078327	AT1G28680	AT1G28680	1	10078189	10079909	+	138	Promoter
1_10111365_10111677	NUDX15	AT1G28960	1	10109500	10111738	-	61	5UTR
1_10137473_10138004	TBL38	AT1G29050	1	10136246	10139228	-	1224	Intronexonboundary
1_10143628_10143921	AT1G29060	AT1G29060	1	10147605	10149780	+	3684	1to5kb
1_10146889_10147227	AT1G29060	AT1G29060	1	10147605	10149780	+	378	Promoter
1_10147344_10147612	AT1G29060	AT1G29060	1	10147605	10149780	+	7	Promoter
1_10149453_10149838	AT1G29070	AT1G29070	1	10149791	10151407	+	47	Promoter
1_10212633_10212851	AT1G29220	AT1G29220	1	10210520	10212722	-	89	Promoter
1_10214226_10214875	CIPK18	AT1G29230	1	10214681	10216563	+	194	Promoter
1_10224676_10224937	PEX7	AT1G29260	1	10224815	10226322	+	122	Promoter
1_10228692_10228986	AT1G29270	AT1G29270	1	10229808	10231384	+	822	Promoter
1_10242720_10243676	AT1G29290	AT1G29290	1	10244453	10245874	+	777	Promoter
1_10244592_10244899	AT1G29290	AT1G29290	1	10244453	10245874	+	139	5UTR
1_10247306_10247586	UNE1	AT1G29300	1	10247707	10249704	-	2118	Intergenic
1_10249482_10249785	UNE1	AT1G29300	1	10247707	10249704	-	81	Promoter
1_10261051_10261555	ERD2	AT1G29330	1	10258248	10261232	-	181	Promoter
1_10264132_10264377	PUB17	AT1G29340	1	10264043	10266917	+	89	5UTR
1_10275671_10275979	AT1G29355	AT1G29355	1	10274048	10275539	+	1623	Intergenic
1_10288050_10288366	COR314-TM2	AT1G29390	1	10286067	10288103	-	53	Promoter
1_10294571_10294789	ML5	AT1G29400	1	10289998	10294630	-	59	Promoter
1_10305014_10305459	SAUR63	AT1G29440	1	10304507	10305108	-	94	Promoter
1_10314082_10314390	AT1G29470	AT1G29470	1	10310131	10314147	-	65	Promoter
1_10320324_10322933	AT1G29490	AT1G29490	1	10319732	10320402	+	592	3UTR
1_10323051_10323434	SAUR68	AT1G29510	1	10322423	10323239	+	628	3UTR
1_10330310_10330519	AT1G29550	AT1G29550	1	10330425	10332326	+	94	Promoter
1_10353786_10354170	AT1G29630	AT1G29630	1	10349427	10353833	+	4359	3UTR
1_10366806_10367072	AT1G29660	AT1G29660	1	10371675	10374005	+	4603	1to5kb
1_10456341_10456559	AT1G29870	AT1G29870	1	10456902	10458782	-	2223	Intergenic
1_10462844_10463217	AT1G29880	AT1G29880	1	10459457	10462967	-	123	Promoter
1_10501394_10501677	RPL18AA	AT1G29970	1	10498351	10501498	-	104	Promoter
1_10516539_10516826	nMAT1	AT1G30010	1	10513151	10516385	+	3388	Intergenic
1_10537337_10537717	GA2OX2	AT1G30040	1	10537457	10540044	+	120	Promoter
1_10538900_10540175	GA2OX2	AT1G30040	1	10537457	10540044	+	1443	3UTR
1_10541499_10541794	AT1G30050	AT1G30050	1	10543022	10544594	+	1228	1to5kb
1_10542125_10542695	AT1G30050	AT1G30050	1	10543022	10544594	+	327	Promoter
1_10548082_10548339	AT1G30070	AT1G30070	1	10546511	10548236	-	103	Promoter
1_10553208_10553962	AT1G30080	AT1G30080	1	10550855	10553295	-	87	Promoter
1_10555851_10556243	AT1G30080	AT1G30080	1	10550855	10553295	-	2556	1to5kb
1_10562689_10562972	AT1G30090	AT1G30090	1	10559496	10561545	-	1144	1to5kb
1_10580304_10580633	NUDX25	AT1G30110	1	10581735	10584152	+	1102	1to5kb
1_10581286_10581688	NUDX25	AT1G30110	1	10581735	10584152	+	47	Promoter
1_10581879_10582080	NUDX25	AT1G30110	1	10581735	10584152	+	144	Intronexonboundary
1_10586535_10586983	PDH-E1 BETA	AT1G30120	1	10584105	10586680	-	145	Promoter
1_10587338_10587600	AT1G30130	AT1G30130	1	10587471	10590209	+	129	Promoter
1_10590407_10590978	AT1G30130	AT1G30130	1	10587471	10590209	+	2936	Intronexonboundary
1_10621117_10621610	AT1G30190	AT1G30190	1	10618893	10620067	+	2224	Intergenic
1_10622452_10623259	AT1G30200	AT1G30200	1	10625000	10627135	+	1741	1to5kb
1_10630358_10630723	TCP24	AT1G30210	1	10627185	10630630	-	93	Promoter
1_10638713_10638944	eEF-1Bb1	AT1G30230	1	10638878	10640941	+	66	Promoter
1_10645927_10646139	AT1G30240	AT1G30240	1	10641031	10646195	-	56	5UTR
1_10663875_10664089	AT1G30280	AT1G30280	1	10662608	10664668	-	579	Intronexonboundary
1_10665050_10665268	AT1G30280	AT1G30280	1	10662608	10664668	-	382	Promoter
1_10665664_10665971	AT1G30280	AT1G30280	1	10662608	10664668	-	996	Promoter
1_10666120_10666477	AT1G30280	AT1G30280	1	10662608	10664668	-	1452	1to5kb
1_10676993_10677383	AT1G30300	AT1G30300	1	10672973	10675455	+	4020	Intronexonboundary
1_10683076_10683394	AT1G30320	AT1G30320	1	10680079	10683137	+	2997	3UTR
1_10684863_10685123	ARF6	AT1G30330	1	10685822	10690988	-	5865	Intergenic
1_10685571_10685897	ARF6	AT1G30330	1	10685822	10690988	-	5091	3UTR
1_10690741_10691050	ARF6	AT1G30330	1	10685822	10690988	-	62	Promoter
1_10691629_10692235	ARF6	AT1G30330	1	10685822	10690988	-	641	Promoter
1_10692970_10693396	ARF6	AT1G30330	1	10685822	10690988	-	1982	1to5kb
1_10705301_10705769	AT1G30350	AT1G30350	1	10709999	10711667	-	5898	Intergenic
1_10709507_10709763	AT1G30350	AT1G30350	1	10709999	10711667	-	1904	Intergenic
1_10712147_10712366	AT1G30350	AT1G30350	1	10709999	10711667	-	480	Promoter
1_10712568_10712859	AT1G30350	AT1G30350	1	10709999	10711667	-	901	Promoter
1_10713577_10713898	ERD4	AT1G30360	1	10715482	10718997	+	1584	1to5kb
1_10715469_10715852	ERD4	AT1G30360	1	10715482	10718997	+	13	Promoter
1_10721218_10721443	DLAH	AT1G30370	1	10719065	10720843	-	375	Promoter
1_10721888_10722201	PSAK	AT1G30380	1	10722183	10723247	+	18	Promoter
1_10726239_10726553	ABCC1	AT1G30400	1	10727317	10738092	+	764	Promoter
1_10792574_10792792	DRT111	AT1G30480	1	10790022	10792725	+	2552	3UTR
1_10806340_10806688	NF-YA7	AT1G30500	1	10804450	10806428	-	88	Promoter
1_10810732_10811099	AAE14	AT1G30520	1	10810397	10813779	+	335	5UTR
1_10817070_10817336	AT1G30540	AT1G30540	1	10816616	10819419	-	2083	Intronexonboundary
1_10821914_10822131	AT1G30550	AT1G30550	1	10822161	10823903	-	1772	Intergenic
1_10827108_10827307	G3Pp3	AT1G30560	1	10824637	10826405	+	2471	Intergenic
1_10828218_10828481	HERK2	AT1G30570	1	10828373	10831656	+	108	Promoter
1_10845041_10845696	AT1G30600	AT1G30600	1	10841107	10845242	-	201	Promoter
1_10846286_10846553	EMB2279	AT1G30610	1	10846513	10850724	+	40	Promoter
1_10854454_10854657	MUR4	AT1G30620	1	10854517	10858280	+	63	Promoter
1_10860229_10860656	AT1G30640	AT1G30640	1	10860619	10865074	+	37	Promoter
1_10869617_10869824	WRKY14	AT1G30650	1	10868218	10871297	+	1399	Intronexonboundary
1_10871964_10872204	WRKY14	AT1G30650	1	10868218	10871297	+	3746	Intergenic
1_10874744_10875080	AT1G30660	AT1G30660	1	10876724	10879143	+	1644	1to5kb
1_10875474_10875900	AT1G30660	AT1G30660	1	10876724	10879143	+	824	Promoter
1_10876505_10876730	AT1G30660	AT1G30660	1	10876724	10879143	+	6	Promoter
1_10881325_10881658	AT1G30680	AT1G30680	1	10881479	10886472	+	154	Promoter
1_10886808_10887535	AT1G30690	AT1G30690	1	10887607	10890407	+	72	Promoter
1_10997541_10997833	VSR6	AT1G30900	1	10996870	11000809	+	671	Intronexonboundary
1_11060116_11060567	TO2	AT1G31020	1	11057105	11059037	+	3011	Intron
1_11067659_11067916	AT1G31040	AT1G31040	1	11069510	11072564	-	4648	Intergenic
1_11084636_11084862	GlcNAc1pUT1	AT1G31070	1	11084666	11088589	+	30	Promoter
1_11102294_11102633	AT1G31095	AT1G31095	1	11102778	11103644	+	145	Promoter
1_11112495_11113143	AT1G31130	AT1G31130	1	11114693	11116195	-	3052	Intergenic
1_11193168_11193742	AT1G31300	AT1G31300	1	11193625	11196397	+	117	Promoter
1_11214430_11214677	PSAF	AT1G31330	1	11214676	11216141	-	1464	3UTR
1_11220158_11220505	RUB1	AT1G31340	1	11217695	11219618	-	540	Promoter
1_11222561_11222970	KUF1	AT1G31350	1	11221267	11222827	-	143	Promoter
1_11231051_11231433	RECQL2	AT1G31360	1	11232318	11237594	+	885	Promoter
1_11232175_11232421	RECQL2	AT1G31360	1	11232318	11237594	+	103	Promoter
1_11249339_11249649	FEI1	AT1G31420	1	11249600	11253915	+	49	Promoter
1_11261639_11261870	AT1G31460	AT1G31460	1	11261443	11263364	-	1494	3UTR
1_11264919_11265131	NFD4	AT1G31470	1	11262918	11264963	-	44	Promoter
1_11373452_11373708	AT1G31760	AT1G31760	1	11372394	11374301	-	593	5UTR
1_11396065_11396283	AT1G31790	AT1G31790	1	11394690	11396018	-	47	Promoter
1_11412117_11412729	ACBP6	AT1G31812	1	11410766	11412233	-	116	Promoter
1_11414297_11414563	FRL2	AT1G31814	1	11412392	11414502	-	61	Promoter
1_11426801_11427218	AT1G31840	AT1G31840	1	11423906	11426818	+	2895	3UTR
1_11436501_11436773	AT1G31870	AT1G31870	1	11436719	11440275	+	54	Promoter
1_11445055_11445590	BRX	AT1G31880	1	11445490	11450232	+	100	Promoter
1_11453313_11453725	NIP3%3B1	AT1G31885	1	11450315	11452068	+	2998	Intergenic
1_11454856_11455197	AT1G31910	AT1G31910	1	11456802	11463896	+	1605	1to5kb
1_11456975_11457316	AT1G31910	AT1G31910	1	11456802	11463896	+	173	5UTR
1_11464210_11464602	AT1G31910	AT1G31910	1	11456802	11463896	+	7408	Intergenic
1_11464765_11465057	XLG3	AT1G31930	1	11464934	11469207	+	123	Promoter
1_11469220_11469471	XLG3	AT1G31930	1	11464934	11469207	+	4286	Intronexonboundary
1_11471224_11471494	AT1G31940	AT1G31940	1	11470056	11471481	-	13	Promoter
1_11472537_11473173	AT1G31940	AT1G31940	1	11470056	11471481	-	1056	1to5kb
1_11531920_11532271	PRK	AT1G32060	1	11532199	11534639	+	72	Promoter
1_11544864_11545072	AT1G32090	AT1G32090	1	11539993	11544166	-	698	Promoter
1_11557557_11558073	AT1G32127	AT1G32127	1	11556744	11558702	+	813	Intronexonboundary
1_11558316_11558515	AT1G32127	AT1G32127	1	11556744	11558702	+	1572	Exon
1_11572655_11574082	XTH30	AT1G32170	1	11575320	11578030	+	1238	1to5kb
1_11575122_11575686	XTH30	AT1G32170	1	11575320	11578030	+	198	Promoter
1_11576199_11576592	XTH30	AT1G32170	1	11575320	11578030	+	879	Intronexonboundary
1_11577789_11578182	XTH30	AT1G32170	1	11575320	11578030	+	2469	Intronexonboundary
1_11592372_11592594	AT1G32190	AT1G32190	1	11592927	11596056	-	3462	Intergenic
1_11594863_11595203	AT1G32190	AT1G32190	1	11592927	11596056	-	853	Intron
1_11605825_11606069	ATDAD1	AT1G32210	1	11605606	11607866	-	1797	Intronexonboundary
1_11610810_11611063	AT1G32225	AT1G32225	1	11610114	11610625	+	696	Intergenic
1_11611859_11612195	RCD1	AT1G32230	1	11611891	11617419	+	32	Promoter
1_11619716_11620466	RCD1	AT1G32230	1	11611891	11617419	+	7825	Intergenic
1_11625115_11625557	KAN2	AT1G32240	1	11625616	11630745	-	5188	Intergenic
1_11626555_11626812	KAN2	AT1G32240	1	11625616	11630745	-	3933	Intronexonboundary
1_11630564_11630821	KAN2	AT1G32240	1	11625616	11630745	-	76	Promoter
1_11670647_11670868	AT1G32360	AT1G32360	1	11672766	11675387	+	1898	1to5kb
1_11691424_11691641	TOM2A	AT1G32400	1	11689064	11691588	-	53	Promoter
1_11751891_11752149	ABCI7	AT1G32500	1	11749798	11752190	-	41	5UTR
1_11765823_11766562	LOL1	AT1G32540	1	11767485	11770049	+	923	Promoter
1_11767451_11767702	LOL1	AT1G32540	1	11767485	11770049	+	34	Promoter
1_11770184_11770924	LOL1	AT1G32540	1	11767485	11770049	+	2699	Intergenic
1_11771130_11771776	FdC2	AT1G32550	1	11771621	11774294	-	2518	3UTR
1_11783919_11784127	AT1G32580	AT1G32580	1	11783543	11785704	+	376	5UTR
1_11797269_11797503	AT1G32610	AT1G32610	1	11795609	11797221	-	48	Promoter
1_11800852_11801226	AT1G32630	AT1G32630	1	11797330	11801359	+	3522	3UTR
1_11809491_11810112	AT1G32650	AT1G32650	1	11810531	11810724	-	612	Intergenic
1_11823279_11823526	AT1G32690	AT1G32690	1	11820872	11821824	-	1455	1to5kb
1_11824204_11825513	AT1G32700	AT1G32700	1	11827359	11829933	+	1846	1to5kb
1_11825942_11826407	AT1G32700	AT1G32700	1	11827359	11829933	+	952	Promoter
1_11827089_11827785	AT1G32700	AT1G32700	1	11827359	11829933	+	270	Promoter
1_11829542_11829955	AT1G32700	AT1G32700	1	11827359	11829933	+	2183	Intronexonboundary
1_11840645_11840922	AT1G32730	AT1G32730	1	11840910	11843308	+	12	Promoter
1_11845833_11846191	HAF01	AT1G32750	1	11846247	11856765	-	10574	Intergenic
1_11877229_11877569	CID11	AT1G32790	1	11874508	11877549	-	20	Promoter
1_11881302_11881565	AT1G32810	AT1G32810	1	11881311	11886015	+	9	Promoter
1_11927765_11928235	AT1G32910	AT1G32910	1	11925320	11927302	+	2445	Intronexonboundary
1_11928387_11928852	AT1G32920	AT1G32920	1	11928757	11929993	+	95	Promoter
1_11930826_11931408	AT1G32928	AT1G32928	1	11931149	11931801	+	259	Promoter
1_11935242_11935686	AT1G32930	AT1G32930	1	11931842	11934759	-	483	Promoter
1_11966344_11966633	AT1G33030	AT1G33030	1	11964776	11966320	-	24	Promoter
1_12010469_12010938	AT1G33120	AT1G33120	1	12010879	12012547	+	59	Promoter
1_12022870_12023321	PGY2	AT1G33140	1	12023225	12024783	+	96	Promoter
1_12051049_12051432	GTL1	AT1G33240	1	12051361	12054753	-	3321	3UTR
1_12054367_12054648	GTL1	AT1G33240	1	12051361	12054753	-	105	5UTR
1_12054818_12055469	GTL1	AT1G33240	1	12051361	12054753	-	65	Promoter
1_12055671_12056318	AT1G33250	AT1G33250	1	12057198	12059792	-	3474	Intergenic
1_12059531_12059763	AT1G33250	AT1G33250	1	12057198	12059792	-	29	5UTR
1_12070241_12070801	AT1G33270	AT1G33270	1	12068063	12070455	-	214	Promoter
1_12084760_12085057	AT1G33330	AT1G33330	1	12084914	12086883	+	143	Promoter
1_12123559_12123758	AT1G33420	AT1G33420	1	12120886	12123576	-	17	Promoter
1_12131804_12133004	AT1G33440	AT1G33440	1	12127389	12130444	-	1360	1to5kb
1_12217917_12218241	AT1G33710	AT1G33710	1	12219657	12220289	+	1416	1to5kb
1_12351187_12351551	UPF3	AT1G33980	1	12351566	12355173	+	15	Promoter
1_12356250_12356493	MES14	AT1G33990	1	12355557	12358031	+	693	Intronexonboundary
1_12358781_12359119	OHP2	AT1G34000	1	12357910	12358966	-	153	Promoter
1_12466048_12466253	AT1G34220	AT1G34220	1	12462849	12466089	-	41	Promoter
1_12473443_12473831	EPF2	AT1G34245	1	12472868	12473974	+	575	Intronexonboundary
1_12530531_12531104	AT1G34340	AT1G34340	1	12530815	12534306	+	284	Promoter
1_12685032_12685330	AT1G34630	AT1G34630	1	12685176	12687641	+	144	Promoter
1_12712268_12712695	MYB93	AT1G34670	1	12709090	12710665	+	3178	Intergenic
1_12851717_12852022	PHI-1	AT1G35140	1	12851983	12853235	+	39	Promoter
1_12935899_12936773	MLP165	AT1G35260	1	12936849	12937787	-	1014	Intergenic
1_13029926_13030209	AT1G35430	AT1G35430	1	13030553	13031375	-	1166	Intergenic
1_13040639_13040872	FBH1	AT1G35460	1	13039660	13042159	+	979	Intronexonboundary
1_13045850_13046170	RALFL5	AT1G35467	1	13049114	13049437	+	2944	1to5kb
1_13047393_13047614	RALFL5	AT1G35467	1	13049114	13049437	+	1500	1to5kb
1_13073647_13074473	AT1G35510	AT1G35510	1	13071165	13074984	+	2482	Intronexonboundary
1_13079461_13079716	AT1G35516	AT1G35516	1	13078416	13079773	+	1045	3UTR
1_13192426_13192630	AT1G35660	AT1G35660	1	13192608	13198142	+	22	Promoter
1_13224400_13224637	AT1G35710	AT1G35710	1	13220471	13224681	+	3929	3UTR
1_13277239_13277600	AT1G35780	AT1G35780	1	13277259	13280387	-	2787	3UTR
1_13279093_13279385	AT1G35780	AT1G35780	1	13277259	13280387	-	1002	5UTR
1_14026946_14027343	AT1G36980	AT1G36980	1	14024634	14027040	+	2312	3UTR
1_14030171_14030978	AT1G36990	AT1G36990	1	14027222	14030500	-	329	Promoter
1_14147562_14147975	AT1G37113	AT1G37113	1	14136413	14138703	+	11149	Intron
1_14173346_14173605	HCS2	AT1G37150	1	14174798	14178034	-	4429	Intergenic
1_14305499_14305982	AT1G38131	AT1G38131	1	14292996	14296253	-	9246	Intergenic
1_15082128_15082349	AT1G40104	AT1G40104	1	15081952	15085893	+	176	Intronexonboundary
1_15880378_15880692	AT1G42430	AT1G42430	1	15891281	15894576	+	10589	Intergenic
1_15900016_15900315	AT1G42440	AT1G42440	1	15895197	15900105	-	89	Promoter
1_16127297_16127710	AT1G42960	AT1G42960	1	16125743	16127298	+	1554	3UTR
1_16137637_16137988	BZIP60	AT1G42990	1	16135723	16137463	-	174	Promoter
1_16616973_16617262	SEU	AT1G43850	1	16616988	16622049	+	15	Promoter
1_16646293_16646751	RAB18	AT1G43890	1	16646696	16648648	+	55	Promoter
1_16800007_16800348	ALDH3H1	AT1G44170	1	16796400	16800321	-	27	Promoter
1_16800966_16801235	ALDH3H1	AT1G44170	1	16796400	16800321	-	645	Promoter
1_16805651_16805917	AT1G44180	AT1G44180	1	16807828	16810565	-	4648	Intergenic
1_16866394_16868375	AT1G44542	AT1G44542	1	16864831	16866787	-	393	Promoter
1_16868563_16868793	NPQ4	AT1G44575	1	16870221	16873427	+	1428	1to5kb
1_16869343_16869687	NPQ4	AT1G44575	1	16870221	16873427	+	534	Promoter
1_16887926_16888277	AT1G44740	AT1G44740	1	16887217	16889155	+	709	Intronexonboundary
1_16896974_16897233	AT1G44760	AT1G44760	1	16896679	16898645	-	1412	Intronexonboundary
1_16964773_16965188	AT1G44895	AT1G44895	1	16965181	16965586	+	7	Promoter
1_17062551_17062792	BGAL5	AT1G45130	1	17065111	17069269	+	2319	1to5kb
1_17063499_17064055	BGAL5	AT1G45130	1	17065111	17069269	+	1056	1to5kb
1_17093219_17093638	AT1G45163	AT1G45163	1	17090677	17091464	-	1755	1to5kb
1_17097854_17098124	AT1G45170	AT1G45170	1	17095980	17098041	-	83	Promoter
1_17168967_17169216	AT1G45230	AT1G45230	1	17169436	17171472	-	2256	Intergenic
1_17238865_17239098	WOX4	AT1G46480	1	17236524	17238185	-	680	Promoter
1_17247095_17247339	WOX4	AT1G46480	1	17236524	17238185	-	8910	Intron
1_17252569_17252962	AT1G46696	AT1G46696	1	17261860	17264183	-	11221	Intergenic
1_17285443_17285847	RD21A	AT1G47128	1	17282749	17285749	-	98	Promoter
1_17286561_17286834	RD21A	AT1G47128	1	17282749	17285749	-	812	Promoter
1_17288213_17288744	RD21A	AT1G47128	1	17282749	17285749	-	2464	1to5kb
1_17291087_17291308	AT1G47130	AT1G47130	1	17291755	17292755	+	447	Promoter
1_17305391_17306087	CYCA3%3B3	AT1G47220	1	17303676	17305197	+	1715	Intergenic
1_17306469_17306697	CYCA3%3B4	AT1G47230	1	17306574	17308848	+	105	Promoter
1_17311290_17311554	NRAMP2	AT1G47240	1	17308803	17311505	-	49	Promoter
1_17342857_17343089	AT1G47310	AT1G47310	1	17342739	17344828	+	118	5UTR
1_17348800_17349141	AT1G47317	AT1G47317	1	17347094	17347515	+	1706	Intergenic
1_17350732_17351208	AT1G47330	AT1G47330	1	17351018	17353875	+	190	Promoter
1_17424388_17424897	RBP47C	AT1G47490	1	17424473	17427475	+	85	Promoter
1_17432345_17432696	AT1G47497	AT1G47497	1	17431009	17432401	-	56	Promoter
1_17451394_17451668	AT1G47530	AT1G47530	1	17451553	17454461	+	115	Promoter
1_17504391_17504750	AT1G47610	AT1G47610	1	17504714	17506043	+	36	Promoter
1_17506538_17506915	AT1G47610	AT1G47610	1	17504714	17506043	+	1824	Intergenic
1_17562873_17563102	OSB1	AT1G47720	1	17561286	17562934	-	61	Promoter
1_17567028_17567393	AT1G47740	AT1G47740	1	17566511	17569297	+	517	5UTR
1_17634375_17634664	ATE2F2	AT1G47870	1	17634697	17637809	+	33	Promoter
1_17686674_17687053	AT1G47970	AT1G47970	1	17686990	17688859	+	63	Promoter
1_17697843_17698053	GA2OX4	AT1G47990	1	17698598	17701041	+	545	Promoter
1_17769592_17770187	AT1G48100	AT1G48100	1	17766738	17769951	+	2854	3UTR
1_17780019_17780257	AT1G48120	AT1G48120	1	17773627	17780106	-	87	Promoter
1_17825387_17825596	GCR1	AT1G48270	1	17827953	17830420	-	4824	Intergenic
1_17834743_17835026	AT1G48280	AT1G48280	1	17835032	17837781	+	6	Promoter
1_17858390_17858737	AT1G48325	AT1G48325	1	17857258	17857722	+	1132	Intergenic
1_17862435_17862814	AT1G48330	AT1G48330	1	17863660	17864558	+	846	Promoter
1_17892421_17892764	AGO1	AT1G48410	1	17885633	17892632	-	132	Promoter
1_17894918_17895410	D-CDES	AT1G48420	1	17895784	17898813	-	3403	Intergenic
1_17898715_17898948	D-CDES	AT1G48420	1	17895784	17898813	-	98	Promoter
1_17906781_17907234	AT1G48440	AT1G48440	1	17906871	17908534	+	90	Promoter
1_17910361_17910747	AT1G48460	AT1G48460	1	17910779	17913344	+	32	Promoter
1_17920879_17921614	RKL1	AT1G48480	1	17918207	17921116	+	2672	3UTR
1_17939843_17940132	GATB	AT1G48520	1	17940050	17942864	+	82	Promoter
1_17952738_17953040	AT1G48550	AT1G48550	1	17950569	17952743	-	5	Promoter
1_17983266_17983726	PEX3	AT1G48635	1	17983646	17986292	+	80	Promoter
1_18034789_18035005	AT1G48750	AT1G48750	1	18035967	18036510	+	962	Promoter
1_18067954_18068173	EMB1144	AT1G48850	1	18064905	18068154	-	19	Promoter
1_18080153_18080661	TBL7	AT1G48880	1	18080408	18082925	+	253	Promoter
1_18111495_18111823	AT1G48953	AT1G48953	1	18110814	18111463	-	32	Promoter
1_18132495_18132780	AT1G49010	AT1G49010	1	18132545	18134017	+	50	Promoter
1_18175805_18176535	BBX17	AT1G49130	1	18174373	18176389	-	146	Promoter
1_18178219_18178432	AT1G49150	AT1G49150	1	18178479	18179228	+	47	Promoter
1_18182565_18182769	WNK7	AT1G49160	1	18179250	18182510	-	55	Promoter
1_18183081_18183319	AT1G49170	AT1G49170	1	18183184	18184583	-	1264	3UTR
1_18211232_18211521	AT1G49225	AT1G49225	1	18206312	18211390	-	131	Promoter
1_18215717_18215950	ACT8	AT1G49240	1	18215800	18218339	+	83	Promoter
1_18218400_18218790	AT1G49245	AT1G49245	1	18218341	18219269	+	59	5UTR
1_18273335_18273571	AT1G49380	AT1G49380	1	18276643	18279532	+	3072	1to5kb
1_18286788_18287107	TOM6	AT1G49410	1	18285306	18287034	-	73	Promoter
1_18287886_18288292	AT1G49420	AT1G49420	1	18287859	18288650	-	358	Intronexonboundary
1_18305372_18305573	AT1G49450	AT1G49450	1	18305445	18307557	+	73	Promoter
1_18307062_18307381	AT1G49450	AT1G49450	1	18305445	18307557	+	1617	Intronexonboundary
1_18316307_18316767	RTV1	AT1G49480	1	18314117	18316861	-	94	5UTR
1_18326655_18327094	emb1273	AT1G49510	1	18326846	18328714	+	191	Promoter
1_18344443_18344761	AT1G49560	AT1G49560	1	18342451	18344452	+	1992	3UTR
1_18359243_18359476	RBP47A	AT1G49600	1	18356799	18360447	-	971	Intronexonboundary
1_18363058_18363445	AT1G49610	AT1G49610	1	18361679	18363192	-	134	Promoter
1_18364637_18364914	ICK5	AT1G49620	1	18365336	18366744	-	1830	Intergenic
1_18366569_18366884	ICK5	AT1G49620	1	18365336	18366744	-	140	Promoter
1_18379845_18380161	CXE5	AT1G49660	1	18378634	18379901	-	56	Promoter
1_18388811_18389075	AT1G49700	AT1G49700	1	18388792	18390523	-	1448	Intronexonboundary
1_18393726_18394017	FUT12	AT1G49710	1	18391273	18394030	-	13	5UTR
1_18398970_18399207	ABF1	AT1G49720	1	18400003	18402628	+	796	Promoter
1_18399790_18400253	ABF1	AT1G49720	1	18400003	18402628	+	213	Promoter
1_18406883_18407324	AT1G49740	AT1G49740	1	18407400	18410022	+	76	Promoter
1_18414563_18414803	AT1G49750	AT1G49750	1	18410857	18413016	-	1547	1to5kb
1_18428187_18428653	PUB26	AT1G49780	1	18428788	18430497	-	1844	Intergenic
1_18431188_18431450	PUB26	AT1G49780	1	18428788	18430497	-	691	Promoter
1_18439431_18439729	NHD2	AT1G49810	1	18439945	18442237	-	2508	Intergenic
1_18451640_18452084	AT1G49840	AT1G49840	1	18451746	18454463	+	106	Promoter
1_18456506_18456747	AT1G49850	AT1G49850	1	18454844	18456619	-	113	Promoter
1_18467456_18467777	Erv1	AT1G49880	1	18463998	18466085	+	3458	Intergenic
1_18469993_18470201	QWRF2	AT1G49890	1	18470046	18473833	+	53	Promoter
1_18478431_18479014	BUB3.2	AT1G49910	1	18478951	18481539	+	63	Promoter
1_18517450_18517675	TUA2	AT1G50010	1	18517586	18520000	+	89	Promoter
1_18521770_18522099	AT1G50020	AT1G50020	1	18519946	18521781	-	11	Promoter
1_18543680_18544207	AT1G50040	AT1G50040	1	18542061	18544034	+	1619	3UTR
1_18579065_18579346	AT1G50140	AT1G50140	1	18569686	18579182	-	117	Promoter
1_18639365_18639740	AT1G50325	AT1G50325	1	18639874	18640488	-	748	Intergenic
1_18643827_18644142	AT1G50340	AT1G50340	1	18647376	18647849	-	3707	Intergenic
1_18649650_18649875	VIIIA	AT1G50360	1	18649706	18657400	+	56	Promoter
1_18679971_18680302	SCL3	AT1G50420	1	18677694	18680300	-	2	Promoter
1_18680664_18681230	SCL3	AT1G50420	1	18677694	18680300	-	364	Promoter
1_18690334_18691037	AT1G50450	AT1G50450	1	18687785	18690503	-	169	Promoter
1_18701042_18701413	THFS	AT1G50480	1	18701882	18704938	+	469	Promoter
1_18701679_18702065	THFS	AT1G50480	1	18701882	18704938	+	183	Promoter
1_18739335_18739637	SCL5	AT1G50600	1	18737063	18739649	-	12	Intronexonboundary
1_18740455_18740792	SCL5	AT1G50600	1	18737063	18739649	-	806	Promoter
1_18759916_18760339	ERF3	AT1G50640	1	18756972	18758708	-	1208	1to5kb
1_18765503_18765750	AT1G50650	AT1G50650	1	18763640	18764367	-	1136	1to5kb
1_18770980_18771244	AT1G50660	AT1G50660	1	18770937	18774759	+	43	5UTR
1_18835193_18835679	AT1G50830	AT1G50830	1	18835271	18838029	-	2350	3UTR
1_18838018_18838323	AT1G50830	AT1G50830	1	18835271	18838029	-	11	Promoter
1_18941692_18941961	AT1G51130	AT1G51130	1	18939194	18941719	-	27	Promoter
1_18942317_18942835	AT1G51130	AT1G51130	1	18939194	18941719	-	598	Promoter
1_18945652_18945926	FBH3	AT1G51140	1	18943447	18945812	-	114	Promoter
1_18949488_18949771	AT1G51160	AT1G51160	1	18949532	18951891	+	44	Promoter
1_18951887_18952625	AT1G51160	AT1G51160	1	18949532	18951891	+	2355	3UTR
1_18998110_18998375	AT1G51230	AT1G51230	1	18997026	18997434	-	676	Promoter
1_19021735_19021989	AT1G51310	AT1G51310	1	19018941	19021808	-	73	Promoter
1_19026242_19026814	AT1G51320	AT1G51320	1	19025642	19026769	+	600	Intronexonboundary
1_19029790_19030331	AT1G51330	AT1G51330	1	19028841	19029844	-	54	Promoter
1_19030916_19032549	AT1G51340	AT1G51340	1	19030998	19035121	+	82	Promoter
1_19052391_19052866	AT1G51400	AT1G51400	1	19052023	19052582	-	191	Promoter
1_19081788_19082066	ABCG13	AT1G51460	1	19076838	19081451	-	337	Promoter
1_19101684_19102016	ABCG12	AT1G51500	1	19097712	19101265	-	419	Promoter
1_19104818_19105209	Y14	AT1G51510	1	19102791	19104933	-	115	Promoter
1_19119351_19119645	AT1G51550	AT1G51550	1	19117032	19119382	-	31	Promoter
1_19124900_19125217	AT1G51570	AT1G51570	1	19122161	19125375	-	158	5UTR
1_19145362_19145587	MSR2	AT1G51630	1	19141823	19144320	-	1042	1to5kb
1_19149271_19149543	ATEXO70G2	AT1G51640	1	19149761	19152288	-	2745	Intergenic
1_19151910_19152725	AT1G51650	AT1G51650	1	19152508	19154051	+	217	Promoter
1_19153832_19154436	MKK4	AT1G51660	1	19154323	19156338	+	113	Promoter
1_19155836_19156354	MKK4	AT1G51660	1	19154323	19156338	+	1513	3UTR
1_19161436_19161756	4CL1	AT1G51680	1	19158746	19161737	-	19	Promoter
1_19162112_19162856	4CL1	AT1G51680	1	19158746	19161737	-	375	Promoter
1_19162995_19164159	B ALPHA	AT1G51690	1	19163843	19170449	+	316	Promoter
1_19165914_19166206	B ALPHA	AT1G51690	1	19163843	19170449	+	2071	5UTR
1_19174650_19174855	DOF1	AT1G51700	1	19173880	19175228	+	770	3UTR
1_19191429_19191693	AT1G51745	AT1G51745	1	19191466	19194908	+	37	Promoter
1_19300473_19300756	LYK3	AT1G51940	1	19295820	19299169	-	1304	1to5kb
1_19302276_19303669	IAA18	AT1G51950	1	19305081	19307518	+	1412	1to5kb
1_19305037_19305652	IAA18	AT1G51950	1	19305081	19307518	+	44	Promoter
1_19307080_19308173	IAA18	AT1G51950	1	19305081	19307518	+	1999	Intronexonboundary
1_19369111_19369329	AR791	AT1G52080	1	19369089	19372121	+	22	5UTR
1_19427312_19427613	AT1G52180	AT1G52180	1	19424944	19425928	-	1384	1to5kb
1_19432806_19433772	AT1G52190	AT1G52190	1	19434480	19439031	+	708	Promoter
1_19459631_19459908	AT1G52245	AT1G52245	1	19458612	19459763	-	132	Promoter
1_19470059_19470306	PERK15	AT1G52290	1	19469820	19472582	-	2276	3UTR
1_19474526_19474812	AT1G52300	AT1G52300	1	19474898	19476234	-	1422	Intergenic
1_19491580_19491798	AT1G52342	AT1G52342	1	19491767	19493122	-	1324	3UTR
1_19572155_19572369	AT1G52540	AT1G52540	1	19570058	19572204	-	49	Promoter
1_19572523_19572958	AT1G52550	AT1G52550	1	19572755	19574059	-	1101	3UTR
1_19580656_19580867	AT1G52565	AT1G52565	1	19579839	19580977	-	110	5UTR
1_19581816_19582037	AT1G52565	AT1G52565	1	19579839	19580977	-	839	Promoter
1_19582733_19583015	PLDALPHA2	AT1G52570	1	19583617	19587531	-	4516	Intergenic
1_19600402_19600754	AT1G52618	AT1G52618	1	19603147	19603743	+	2393	1to5kb
1_19602052_19602383	AT1G52618	AT1G52618	1	19603147	19603743	+	764	Promoter
1_19603320_19603779	AT1G52620	AT1G52620	1	19603796	19606287	+	17	Promoter
1_19610410_19610623	AT1G52640	AT1G52640	1	19608709	19610452	-	42	Promoter
1_19617411_19617686	AT1G52670	AT1G52670	1	19614931	19617611	-	75	Promoter
1_19645089_19645400	AT1G52730	AT1G52730	1	19642452	19645211	+	2637	3UTR
1_19650439_19650645	LysoPL2	AT1G52760	1	19651172	19652825	+	527	Promoter
1_19657854_19658053	AT1G52770	AT1G52770	1	19655831	19657795	+	2023	Intergenic
1_19668409_19668811	AT1G52810	AT1G52810	1	19667127	19668237	+	1282	Intergenic
1_19683946_19684205	AT1G52855	AT1G52855	1	19682773	19683565	-	381	Promoter
1_19685001_19685218	AT1G52870	AT1G52870	1	19685545	19688028	+	327	Promoter
1_19691174_19691483	NAM	AT1G52880	1	19688708	19690589	-	585	Promoter
1_19699112_19699574	NAC019	AT1G52890	1	19696923	19698482	-	630	Promoter
1_19701142_19701440	AT1G52900	AT1G52900	1	19702062	19702916	-	1476	Intergenic
1_19737267_19737501	AtNug2	AT1G52980	1	19737405	19740348	+	96	Promoter
1_19782731_19783326	SPA4	AT1G53090	1	19783185	19786902	+	141	Promoter
1_19843277_19843943	AT1G53200	AT1G53200	1	19840368	19843499	-	222	Promoter
1_19844500_19844732	AT1G53210	AT1G53210	1	19844450	19847856	+	50	5UTR
1_19848413_19849510	TCP3	AT1G53230	1	19849788	19851725	-	2215	Intergenic
1_19851684_19851991	TCP3	AT1G53230	1	19849788	19851725	-	41	Promoter
1_19853898_19854316	mMDH1	AT1G53240	1	19854615	19857146	-	2830	Intergenic
1_19856815_19857417	AT1G53250	AT1G53250	1	19857351	19859275	+	66	Promoter
1_19867243_19867808	AT1G53282	AT1G53282	1	19867930	19868335	-	527	Intergenic
1_19873456_19873688	AT1G53290	AT1G53290	1	19871116	19873727	+	2340	3UTR
1_19876312_19876562	AT1G53290	AT1G53290	1	19871116	19873727	+	5196	Intergenic
1_19889074_19889587	PPC1	AT1G53310	1	19883935	19888413	-	661	Promoter
1_19893348_19893639	TLP7	AT1G53320	1	19890935	19893504	-	135	Promoter
1_19907125_19907412	AT1G53360	AT1G53360	1	19907179	19908548	+	54	Promoter
1_19916454_19917091	AT1G53380	AT1G53380	1	19912990	19916686	-	232	Promoter
1_19924436_19924683	AT1G53400	AT1G53400	1	19924660	19926631	+	23	Promoter
1_19936022_19936335	AT1G53430	AT1G53430	1	19934987	19941185	+	1035	Intronexonboundary
1_19957698_19957912	MSL4	AT1G53470	1	19958380	19961827	+	468	Promoter
1_19969459_19969880	MUM4	AT1G53500	1	19966944	19969757	-	123	Promoter
1_19970038_19970422	MPK18	AT1G53510	1	19970334	19974393	-	3971	3UTR
1_19974344_19974622	MPK18	AT1G53510	1	19970334	19974393	-	49	Promoter
1_19993301_19993646	GLY3	AT1G53580	1	19991271	19993458	-	157	Promoter
1_20028570_20028923	CID8	AT1G53650	1	20028923	20031619	-	2696	3UTR
1_20036449_20036659	MSRB1	AT1G53670	1	20036631	20038261	+	28	Promoter
1_20041534_20041862	AT1G53690	AT1G53690	1	20042452	20043626	-	1764	Intergenic
1_20056306_20056652	AT1G53710	AT1G53710	1	20053161	20056396	-	90	Promoter
1_20061266_20061646	SRF6	AT1G53730	1	20061405	20065713	+	139	Promoter
1_20070926_20071244	AT1G53770	AT1G53770	1	20071251	20073863	-	2619	Intergenic
1_20081400_20081765	AT1G53790	AT1G53790	1	20079081	20081464	-	64	Promoter
1_20098065_20098277	PME2	AT1G53830	1	20098522	20100978	+	245	Promoter
1_20100534_20101134	PME2	AT1G53830	1	20098522	20100978	+	2012	3UTR
1_20137647_20137855	GLIP5	AT1G53920	1	20137537	20139716	+	110	5UTR
1_20138112_20138950	GLIP5	AT1G53920	1	20137537	20139716	+	575	Intronexonboundary
1_20169498_20169735	MVP1	AT1G54030	1	20167597	20169684	+	1901	3UTR
1_20180330_20180872	AT1G54050	AT1G54050	1	20179357	20180566	-	236	Promoter
1_20186990_20187288	UBP1A	AT1G54080	1	20183545	20187096	-	106	Promoter
1_20191810_20192281	EXO70D2	AT1G54090	1	20189472	20191900	+	2338	3UTR
1_20198958_20199455	AT1G54110	AT1G54110	1	20199310	20201787	+	145	Promoter
1_20204017_20204353	CCX4	AT1G54115	1	20201806	20204412	+	2211	3UTR
1_20209138_20210101	RSH3	AT1G54130	1	20210772	20213942	+	671	Promoter
1_20215190_20215536	TAFII21	AT1G54140	1	20213899	20215265	-	75	Promoter
1_20220758_20221422	CID3	AT1G54170	1	20221029	20226055	-	4633	Intronexonboundary
1_20226933_20227309	BRX-LIKE3	AT1G54180	1	20227168	20230237	+	141	Promoter
1_20230042_20230559	BRX-LIKE3	AT1G54180	1	20227168	20230237	+	2874	3UTR
1_20235555_20235891	AT1G54200	AT1G54200	1	20235465	20237358	+	90	5UTR
1_20238872_20239907	ATG12A	AT1G54210	1	20241226	20242641	+	1319	1to5kb
1_20240614_20241331	ATG12A	AT1G54210	1	20241226	20242641	+	105	Promoter
1_20250271_20250550	AT1G54230	AT1G54230	1	20250518	20252365	+	32	Promoter
1_20254822_20255058	AT1G54240	AT1G54240	1	20252718	20254708	+	2104	Intergenic
1_20256725_20256978	NRPB8A	AT1G54250	1	20254938	20256688	+	1787	Intergenic
1_20259228_20259945	AT1G54260	AT1G54260	1	20256936	20259417	+	2292	Intronexonboundary
1_20270062_20270331	AT1G54290	AT1G54290	1	20268474	20270140	-	78	Promoter
1_20273324_20273612	AT1G54310	AT1G54310	1	20273567	20275574	+	45	Promoter
1_20283244_20283543	ICDH	AT1G54340	1	20283326	20286786	+	82	Promoter
1_20290273_20290630	TAF6B	AT1G54360	1	20290556	20293324	+	74	Promoter
1_20385193_20385409	PES1	AT1G54570	1	20380435	20385380	-	29	Promoter
1_20385825_20386264	PES1	AT1G54570	1	20380435	20385380	-	445	Promoter
1_20389298_20389594	ACP2	AT1G54580	1	20389347	20391147	+	49	Promoter
1_20402941_20403158	ACP3	AT1G54630	1	20401357	20403166	-	8	Intronexonboundary
1_20415474_20415703	GAMMA-H2AX	AT1G54690	1	20414316	20415287	-	187	Promoter
1_20430566_20430820	AT1G54740	AT1G54740	1	20430769	20431986	+	51	Promoter
1_20454491_20454982	AT1G54850	AT1G54850	1	20454389	20456220	+	102	Intronexonboundary
1_20510690_20511400	AXR4	AT1G54990	1	20511519	20513681	+	119	Promoter
1_20546257_20546605	AT1G55050	AT1G55050	1	20541837	20545861	+	4420	Intergenic
1_20565949_20566679	FRUCT5	AT1G55120	1	20566030	20569322	+	81	Promoter
1_20577439_20577646	AT1G55152	AT1G55152	1	20577424	20578308	-	662	3UTR
1_20579994_20580418	AT1G55160	AT1G55160	1	20577377	20580010	+	2617	3UTR
1_20588244_20588723	PRA7	AT1G55190	1	20588397	20589199	+	153	Promoter
1_20592054_20592583	AT1G55200	AT1G55200	1	20589129	20593000	-	417	5UTR
1_20593450_20593746	AT1G55200	AT1G55200	1	20589129	20593000	-	450	Promoter
1_20599426_20599645	AT1G55210	AT1G55210	1	20597734	20598768	-	658	Promoter
1_20617066_20617346	AT1G55265	AT1G55265	1	20617313	20618005	+	33	Promoter
1_20649593_20650035	AGP21	AT1G55330	1	20648465	20648891	-	702	Promoter
1_20651190_20651716	AT1G55340	AT1G55340	1	20651814	20653764	+	98	Promoter
1_20665011_20665328	DEK1	AT1G55350	1	20653740	20665110	-	99	Promoter
1_20668572_20668939	AT1G55360	AT1G55360	1	20666180	20668817	-	122	Promoter
1_20669944_20670183	AT1G55360	AT1G55360	1	20666180	20668817	-	1127	1to5kb
1_20670385_20670977	AT1G55360	AT1G55360	1	20666180	20668817	-	1568	1to5kb
1_20674114_20674796	AT1G55365	AT1G55365	1	20673455	20674503	-	293	Promoter
1_20711328_20711752	AT1G55475	AT1G55475	1	20711465	20713560	+	137	Promoter
1_20719137_20719417	ECT4	AT1G55500	1	20719473	20722856	+	56	Promoter
1_20723134_20723560	BCDH BETA1	AT1G55510	1	20723279	20725747	+	145	Promoter
1_20731177_20731562	AT1G55535	AT1G55535	1	20731589	20734066	-	2504	Intergenic
1_20743055_20743299	LNO1	AT1G55540	1	20734446	20743188	-	111	Promoter
1_20771843_20772090	AT1G55590	AT1G55590	1	20769300	20771880	-	37	Promoter
1_20783630_20784157	BRL1	AT1G55610	1	20779493	20784017	-	140	Promoter
1_20784593_20785086	BRL1	AT1G55610	1	20779493	20784017	-	576	Promoter
1_20785546_20785776	CLC-F	AT1G55620	1	20787074	20791208	-	5432	Intergenic
1_20803662_20803883	AT1G55675	AT1G55675	1	20803661	20804574	-	691	3UTR
1_20807905_20808146	AT1G55680	AT1G55680	1	20804592	20807940	-	35	Promoter
1_20819019_20819263	AT1G55700	AT1G55700	1	20821591	20823640	+	2328	1to5kb
1_20851685_20851946	AT1G55770	AT1G55770	1	20850977	20851664	-	21	Promoter
1_20870511_20870839	AT1G55830	AT1G55830	1	20867559	20870338	-	173	Promoter
1_20929870_20930376	AT1G55960	AT1G55960	1	20927643	20930209	-	167	Promoter
1_20930513_20930831	AT1G55960	AT1G55960	1	20927643	20930209	-	304	Promoter
1_20951894_20952237	AT1G56020	AT1G56020	1	20951856	20953595	+	38	5UTR
1_20953460_20954423	AT1G56020	AT1G56020	1	20951856	20953595	+	1604	3UTR
1_20956293_20957136	AT1G56030	AT1G56030	1	20957098	20958550	-	1414	Exon
1_20962392_20962627	AT1G56045	AT1G56045	1	20962570	20963546	+	57	Promoter
1_20971631_20971918	LOS1	AT1G56070	1	20967652	20971742	-	111	Promoter
1_20986880_20987162	AT1G56120	AT1G56120	1	20987128	20993572	-	6410	3UTR
1_21007782_21008016	AT1G56145	AT1G56145	1	21008057	21014095	-	6079	Intergenic
1_21015452_21015659	AT1G56145	AT1G56145	1	21008057	21014095	-	1357	1to5kb
1_21024361_21024702	NF-YC2	AT1G56170	1	21024482	21025902	+	121	Promoter
1_21028055_21028528	AT1G56180	AT1G56180	1	21024486	21028066	-	11	Promoter
1_21035407_21035763	AT1G56210	AT1G56210	1	21035590	21037285	+	173	Promoter
1_21036518_21037836	AT1G56210	AT1G56210	1	21035590	21037285	+	928	3UTR
1_21038857_21039433	AT1G56210	AT1G56210	1	21035590	21037285	+	3267	Intergenic
1_21040253_21040555	AT1G56220	AT1G56220	1	21042951	21044998	+	2396	1to5kb
1_21042942_21043611	AT1G56220	AT1G56220	1	21042951	21044998	+	9	Promoter
1_21043875_21044360	AT1G56225	AT1G56225	1	21044756	21045708	-	1348	Intergenic
1_21049031_21049448	AT1G56230	AT1G56230	1	21045993	21049241	-	207	Promoter
1_21051678_21052166	AT1G56233	AT1G56233	1	21050540	21051017	-	661	Promoter
1_21055694_21056184	PP2-B13	AT1G56240	1	21056099	21057577	-	1393	3UTR
1_21058852_21059195	PP2-B13	AT1G56240	1	21056099	21057577	-	1275	1to5kb
1_21059595_21059891	PP2-B14	AT1G56250	1	21061522	21063047	-	3156	Intergenic
1_21063714_21064232	MDO1	AT1G56260	1	21064223	21065875	-	1643	3UTR
1_21082223_21082585	AT1G56310	AT1G56310	1	21082490	21085651	+	95	Promoter
1_21086423_21086944	AT1G56320	AT1G56320	1	21085548	21086499	-	76	Promoter
1_21094449_21094684	AT1G56350	AT1G56350	1	21094743	21098047	+	59	Promoter
1_21133344_21133852	AT1G56423	AT1G56423	1	21128912	21130939	+	4432	Intergenic
1_21134055_21134278	NAS4	AT1G56430	1	21136835	21138277	+	2557	1to5kb
1_21141521_21141875	PBG1	AT1G56450	1	21141633	21144458	+	112	Promoter
1_21146108_21146315	AT1G56460	AT1G56460	1	21146236	21149805	+	79	Promoter
1_21198793_21199236	PGN	AT1G56570	1	21195644	21199130	+	3149	3UTR
1_21205372_21205588	ZIP4	AT1G56590	1	21201948	21204856	-	516	Promoter
1_21206975_21207338	GolS2	AT1G56600	1	21207537	21209635	+	199	Promoter
1_21227358_21227631	AT1G56630	AT1G56630	1	21223406	21227112	-	246	Promoter
1_21255905_21256376	AT1G56700	AT1G56700	1	21256025	21257973	+	120	Promoter
1_21267306_21267560	AT1G56720	AT1G56720	1	21263344	21266469	-	837	Promoter
1_21329989_21330387	AT1G57600	AT1G57600	1	21330017	21334790	-	4403	Intronexonboundary
1_21364554_21364875	Cand1	AT1G57680	1	21362359	21364749	-	126	Promoter
1_21391572_21391800	AT1G57760	AT1G57760	1	21390003	21390565	+	1569	Intergenic
1_21394926_21395254	AT1G57765	AT1G57765	1	21393084	21394982	+	1842	3UTR
1_21430624_21430941	AT1G57860	AT1G57860	1	21429826	21430910	-	31	Promoter
1_21502676_21502897	AT1G58070	AT1G58070	1	21502905	21504078	+	8	Promoter
1_21507370_21507594	ATP-PRT1	AT1G58080	1	21504314	21507679	-	85	5UTR
1_21517377_21517684	AT1G58110	AT1G58110	1	21515405	21518270	-	586	Intronexonboundary
1_21518098_21518352	AT1G58110	AT1G58110	1	21515405	21518270	-	82	Promoter
1_21518701_21519321	AT1G58110	AT1G58110	1	21515405	21518270	-	431	Promoter
1_21539830_21540063	BCA6	AT1G58180	1	21537577	21540038	-	25	Promoter
1_21553163_21553609	EMB1674	AT1G58210	1	21553537	21554778	+	72	Promoter
1_21579704_21579949	AT1G58235	AT1G58235	1	21579622	21581165	-	1216	3UTR
1_21601543_21601823	SAB	AT1G58250	1	21587060	21601740	-	83	Promoter
1_21726874_21727099	RBP1	AT1G58470	1	21726963	21728802	+	89	Promoter
1_21911314_21911612	BPEp	AT1G59640	1	21909070	21911289	-	25	Promoter
1_21912934_21913306	BPEp	AT1G59640	1	21909070	21911289	-	1645	1to5kb
1_21919764_21920125	CW14	AT1G59650	1	21919745	21923013	+	19	5UTR
1_22031167_22031416	AT1G59860	AT1G59860	1	22031343	22032250	+	73	Promoter
1_22040354_22040566	PEN3	AT1G59870	1	22034423	22040126	+	5931	Intronexonboundary
1_22094333_22094744	AT1G60000	AT1G60000	1	22093353	22094802	-	58	5UTR
1_22095085_22095361	AT1G60010	AT1G60010	1	22095285	22096620	-	1259	3UTR
1_22096362_22096749	AT1G60010	AT1G60010	1	22095285	22096620	-	129	Promoter
1_22110444_22110650	NAT7	AT1G60030	1	22113671	22117018	-	6368	Intergenic
1_22142076_22142535	AT1G60070	AT1G60070	1	22142604	22149527	-	6992	Intergenic
1_22155256_22155464	BGLU4	AT1G60090	1	22155559	22158272	+	95	Promoter
1_22184524_22184994	TPS10	AT1G60140	1	22176934	22181740	-	2784	1to5kb
1_22185582_22186112	AT1G60160	AT1G60160	1	22188030	22191543	-	5431	Intergenic
1_22249113_22249344	PG1	AT1G60390	1	22247472	22249721	-	377	Intronexonboundary
1_22266027_22266269	ARPC3	AT1G60430	1	22264385	22266079	-	52	Promoter
1_22297081_22297391	DRP4A	AT1G60530	1	22299797	22301167	+	2406	1to5kb
1_22302337_22302571	DRP4A	AT1G60530	1	22299797	22301167	+	2540	Intronexonboundary
1_22311314_22311921	AT1G60560	AT1G60560	1	22308478	22311377	-	63	Promoter
1_22318345_22318556	AT1G60590	AT1G60590	1	22314089	22317070	-	1275	1to5kb
1_22327147_22327445	ABC4	AT1G60600	1	22324437	22327359	-	86	Promoter
1_22343547_22343786	AT1G60670	AT1G60670	1	22343585	22347624	+	38	Promoter
1_22368669_22368899	AT1G60770	AT1G60770	1	22366701	22368714	-	45	Promoter
1_22387504_22387711	NIK3	AT1G60800	1	22383393	22387766	-	55	5UTR
1_22387977_22388442	ACLA-2	AT1G60810	1	22388527	22391237	-	2795	Intergenic
1_22407733_22408025	AGD2	AT1G60860	1	22400857	22407824	-	91	Promoter
1_22410554_22410780	MEE9	AT1G60870	1	22409298	22410854	+	1256	3UTR
1_22419617_22420121	AT1G60890	AT1G60890	1	22412188	22417312	-	2305	1to5kb
1_22421949_22422381	AT1G60900	AT1G60900	1	22423894	22428053	+	1513	1to5kb
1_22442122_22442429	SNRK2.10	AT1G60940	1	22439063	22442221	-	99	Promoter
1_22444133_22444729	FED A	AT1G60950	1	22444307	22445291	+	174	Promoter
1_22449556_22449876	AT1G60970	AT1G60970	1	22447811	22449536	-	20	Promoter
1_22461217_22461475	SCRL5	AT1G60987	1	22460365	22461164	+	852	Intergenic
1_22512085_22512697	AT1G61100	AT1G61100	1	22508524	22512333	-	248	Promoter
1_22515663_22516090	NAC025	AT1G61110	1	22516602	22518292	+	512	Promoter
1_22516364_22516801	NAC025	AT1G61110	1	22516602	22518292	+	199	Promoter
1_22540781_22541020	EDA16	AT1G61140	1	22534663	22540933	-	87	Promoter
1_22555437_22555734	AT1G61190	AT1G61190	1	22555689	22560757	+	45	Promoter
1_22572759_22573064	BRD4	AT1G61215	1	22572609	22575583	+	150	5UTR
1_22590669_22590984	AT1G61255	AT1G61255	1	22589098	22589789	-	880	Promoter
1_22598274_22598645	AT1G61270	AT1G61270	1	22599541	22602252	-	3607	Intergenic
1_22625089_22625882	AT1G61330	AT1G61330	1	22622975	22624527	+	2114	Intergenic
1_22631946_22632188	AT1G61350	AT1G61350	1	22633774	22636101	+	1586	1to5kb
1_22633742_22634010	AT1G61350	AT1G61350	1	22633774	22636101	+	32	Promoter
1_22636383_22636810	AT1G61350	AT1G61350	1	22633774	22636101	+	2609	Intergenic
1_22702208_22702433	AT1G61540	AT1G61540	1	22702498	22703706	+	65	Promoter
1_22713444_22713686	MLO6	AT1G61560	1	22708468	22712289	-	1155	1to5kb
1_22741475_22741818	AT1G61620	AT1G61620	1	22737475	22739443	+	4000	Intronexonboundary
1_22759299_22759578	AT1G61660	AT1G61660	1	22753611	22756387	-	2912	1to5kb
1_22768394_22768755	AT1G61667	AT1G61667	1	22767464	22768645	+	930	3UTR
1_22795070_22795475	AT1G61730	AT1G61730	1	22793170	22794714	-	356	Promoter
1_22799179_22799818	AT1G61740	AT1G61740	1	22798035	22801416	-	1598	Intronexonboundary
1_22802075_22802551	AT1G61740	AT1G61740	1	22798035	22801416	-	659	Promoter
1_22814077_22814438	AT1G61780	AT1G61780	1	22812573	22814162	-	85	Promoter
1_22816235_22816759	AT1G61790	AT1G61790	1	22814216	22816688	+	2019	Intronexonboundary
[truncated: 10,107 more rows]
