# Supplementary material for: A CRC–MYB-mediated local chromatin loop at the MAB4 locus determines auxin-mediated nectary size in Arabidopsis thaliana
Source: Research Square preprint supplement (doi:10.21203/rs.3.rs-7421252/v1), 2025-09-07
Supplement: Supplementary file 6 [file 50988ee3435108ef980252b1.xlsx]

## Sheet: Sheet1
Supplementary Data 4. List of high-condidence CRC-regulated target genes during nectary development.
crc St12	crc St13-14	CRC ChIP	151 elements included exclusively in "crc St12":	19 common elements in "crc St12" and "crc St13-14":	213 elements included exclusively in "crc St13-14":	114 common elements in "crc St12" and "CRC ChIP":	21 common elements in "crc St12", "crc St13-14" and "CRC ChIP":	198 common elements in "crc St13-14" and "CRC ChIP":	8492 elements included exclusively in "CRC ChIP":
AT1G69180	AT2G39060	AT1G01010	AT4G29030	AT4G21100	AT3G10040	AT3G58780	AT1G69180	AT2G39060	AT1G01010
AT4G29030	AT1G69180	AT1G01040	AT3G08770	AT5G46740	AT4G22490	AT2G35310	AT5G44630	AT3G25810	AT1G01040
AT3G08770	AT3G25810	AT1G01060	AT1G58430	AT1G53490	AT1G43800	AT2G38110	AT1G12330	AT1G18720	AT1G01060
AT5G44630	AT1G53480	AT1G01080	AT2G22170	AT1G02020	AT2G18530	AT2G42830	AT5G46760	AT4G12530	AT1G01080
AT3G58780	AT1G18720	AT1G01100	AT5G22880	AT1G53480	AT4G10270	AT5G23940	AT2G26580	AT1G23010	AT1G01100
AT4G21100	AT4G12530	AT1G01110	AT5G55720	AT2G30650	AT3G19710	AT3G05600	AT5G22500	AT4G00950	AT1G01110
AT2G35310	AT1G53490	AT1G01120	AT5G09730	AT5G46750	AT1G72290	AT1G23410	AT4G35480	AT1G23300	AT1G01120
AT2G38110	AT2G36190	AT1G01130	AT1G03410	AT1G70830	AT3G25820	AT2G42885	AT1G09210	AT3G46160	AT1G01130
AT1G58430	AT1G23010	AT1G01140	AT5G45670	AT1G62500	AT3G25830	AT1G70270	AT1G09560	AT1G74020	AT1G01140
AT2G42830	AT4G00950	AT1G01160	AT2G16760	AT5G25120	AT3G19700	AT5G44620	AT5G54160	AT5G06720	AT1G01160
AT5G23940	AT1G23300	AT1G01180	AT2G45920	AT1G06080	AT3G45140	AT3G11000	AT4G31820	AT1G51340	AT1G01180
AT1G12330	AT3G46160	AT1G01190	AT3G54560	AT1G12350	AT2G43100	AT3G60900	AT2G46680	AT5G20830	AT1G01190
AT5G46760	AT4G21100	AT1G01200	AT1G24020	AT1G22590	AT2G14247	AT5G65360	AT2G22680	AT4G24110	AT1G01200
AT2G26580	AT1G74020	AT1G01210	AT1G60060	AT4G08480	AT3G02020	AT1G15360	AT2G36090	AT4G33560	AT1G01210
AT2G22170	AT2G30650	AT1G01220	AT4G20820	AT5G24270	AT1G20470	AT2G42840	AT5G60760	AT4G35080	AT1G01220
AT3G05600	AT3G10040	AT1G01230	AT3G17160	AT4G37870	AT4G37980	AT1G59650	AT2G36190	AT4G33070	AT1G01230
AT1G23410	AT5G06720	AT1G01260	AT3G45930	AT1G61810	AT3G48000	AT4G31330	AT1G71710	AT5G65110	AT1G01260
AT5G46740	AT5G47060	AT1G01280	AT2G04570	AT3G27940	AT1G12805	AT5G10400	AT4G26850	AT5G11090	AT1G01280
AT5G22880	AT1G51340	AT1G01340	AT1G65370	AT5G10180	AT1G74820	AT3G04010	AT3G54820	AT4G29010	AT1G01340
AT5G22500	AT4G35480	AT1G01430	AT5G23420		AT2G14670	AT5G59690	AT1G32540	AT1G75750	AT1G01430
AT2G42885	AT5G20830	AT1G01460	AT4G27570		AT3G03190	AT2G45120	AT5G47060	AT1G23200	AT1G01460
AT1G53490	AT4G24110	AT1G01470	AT3G46320		AT3G58990	AT1G11600		AT1G12320	AT1G01470
AT1G02020	AT4G22490	AT1G01500	AT5G20740		AT2G38900	AT4G14130		AT1G77110	AT1G01500
AT4G35480	AT4G33560	AT1G01510	AT5G50160		AT4G14040	AT2G36590		AT5G43610	AT1G01510
AT1G70270	AT1G43800	AT1G01520	AT4G19970		AT5G39890	AT3G49570		AT3G60780	AT1G01520
AT1G53480	AT2G36090	AT1G01540	AT3G20670		AT1G44970	AT2G15090		AT1G65970	AT1G01540
AT5G55720	AT5G54160	AT1G01550	AT1G77855		AT1G16410	AT4G18960		AT3G13310	AT1G01550
AT5G09730	AT1G02020	AT1G01570	AT5G60142		AT3G28580	AT4G24050		AT1G19640	AT1G01570
AT5G44620	AT2G18530	AT1G01600	AT5G59910		AT1G62560	AT5G48485		AT5G40350	AT1G01600
AT3G11000	AT4G35080	AT1G01620	AT4G37409		AT5G42180	AT1G02300		AT5G38120	AT1G01620
AT1G03410	AT4G10270	AT1G01630	AT2G14900		AT2G16060	AT4G36220		AT3G21270	AT1G01630
AT5G45670	AT3G19710	AT1G01650	AT3G49270		AT2G37130	AT5G58280		AT1G77080	AT1G01650
AT2G16760	AT1G72290	AT1G01660	AT1G07820		AT4G10265	AT1G13290		AT5G24580	AT1G01660
AT2G45920	AT3G25820	AT1G01680	AT5G10390		AT1G59730	AT3G18550		AT3G16400	AT1G01680
AT3G54560	AT3G25830	AT1G01690	AT5G48180		AT1G05680	AT5G24660		AT3G10340	AT1G01690
AT1G24020	AT4G33070	AT1G01695	AT5G59870		AT2G17710	AT4G26740		AT1G09155	AT1G01695
AT1G09210	AT5G65110	AT1G01700	AT2G28740		AT5G49630	AT2G03505		AT2G35920	AT1G01700
AT3G60900	AT2G26580	AT1G01710	AT4G23810		AT1G63420	AT5G62000		AT2G38940	AT1G01710
AT1G60060	AT3G19700	AT1G01720	AT2G20870		AT1G66570	AT3G53190		AT5G56870	AT1G01720
AT5G65360	AT5G11090	AT1G01740	AT2G42990		AT5G59120	AT3G55880		AT1G03620	AT1G01740
AT4G20820	AT3G45140	AT1G01760	AT3G45980		AT4G24275	AT1G78000		AT4G04020	AT1G01760
AT3G17160	AT4G29010	AT1G01790	AT5G25090		AT4G16130	AT5G42680		AT4G22780	AT1G01790
AT1G09560	AT1G75750	AT1G01800	AT4G37410		AT2G22190	AT5G56300		AT4G39940	AT1G01800
AT3G45930	AT1G23200	AT1G01830	AT1G07660		AT1G10470	AT2G26180		AT1G62480	AT1G01830
AT1G15360	AT1G12330	AT1G01840	AT4G13690		AT3G05020	AT2G28790		AT1G68825	AT1G01840
AT2G30650	AT2G43100	AT1G01880	AT4G39330		AT1G64370	AT3G16180		AT5G06170	AT1G01880
AT2G04570	AT2G14247	AT1G01910	AT5G03680		AT4G13770	AT2G38230		AT2G32510	AT1G01910
AT2G42840	AT3G02020	AT1G01940	AT5G67110		AT5G26000	AT3G14740		AT3G19680	AT1G01940
AT1G65370	AT1G12320	AT1G01970	AT5G48850		AT3G13520	AT5G19290		AT5G26310	AT1G01970
AT5G23420	AT1G20470	AT1G01980	AT4G08910		AT1G78780	AT2G46720		AT2G41905	AT1G01980
AT4G27570	AT4G37980	AT1G01990	AT5G40950		AT1G67865	AT2G26740		AT5G55050	AT1G01990
AT3G46320	AT3G48000	AT1G02000	AT1G49430		AT5G23010	AT2G16570		AT5G24590	AT1G02000
AT5G46750	AT1G77110	AT1G02060	AT1G09200		AT5G19550	AT4G26150		AT3G44990	AT1G02060
AT5G54160	AT5G43610	AT1G02065	AT2G36730		AT5G10625	AT4G27230		AT2G33510	AT1G02065
AT5G20740	AT1G09210	AT1G02080	AT5G59970		AT3G05640	AT2G29980		AT1G05100	AT1G02080
AT5G50160	AT3G60780	AT1G02100	AT4G02060		AT4G14480	AT1G19330		AT1G07430	AT1G02100
AT1G59650	AT1G12805	AT1G02120	AT4G23680		AT2G43550	AT3G04990		AT1G70890	AT1G02120
AT4G31330	AT1G65970	AT1G02130	AT4G02520		AT1G33055	AT1G30600		AT1G23440	AT1G02130
AT5G10400	AT1G74820	AT1G02140	AT3G15270		AT1G62333	AT3G54000		AT1G77590	AT1G02140
AT4G19970	AT3G13310	AT1G02145	AT2G27970		AT3G62540	AT3G23830		AT1G70680	AT1G02145
AT3G20670	AT1G19640	AT1G02160	AT4G21590		AT5G17860	AT1G46480		AT1G24520	AT1G02160
AT4G31820	AT5G40350	AT1G02170	AT1G11850		AT1G13110	AT1G51680		AT4G34750	AT1G02170
AT3G04010	AT5G38120	AT1G02180	AT1G14900		AT4G08555	AT5G49100		AT5G26340	AT1G02180
AT5G59690	AT3G21270	AT1G02205	AT5G61030		AT4G17030	AT4G16610		AT5G24655	AT1G02205
AT1G77855	AT1G77080	AT1G02230	AT4G35640		AT1G76650	AT2G36120		AT3G25640	AT1G02230
AT5G60142	AT1G12350	AT1G02290	AT2G28720		AT1G22530	AT5G15530		AT4G15530	AT1G02290
AT5G59910	AT2G14670	AT1G02320	AT3G25480		AT4G12970	AT2G42800		AT2G28840	AT1G02320
AT2G45120	AT5G24580	AT1G02350	AT1G17200		AT3G26140	AT5G10580		AT5G10430	AT1G02350
AT1G70830	AT3G16400	AT1G02360	AT2G27040		AT1G64780	AT5G01240		AT1G72430	AT1G02360
AT1G11600	AT3G03190	AT1G02380	AT1G02110		AT4G30110	AT5G14640		AT5G14200	AT1G02380
AT4G37409	AT3G10340	AT1G02390	AT4G29020		AT5G23020	AT1G17190		AT3G02550	AT1G02390
AT2G14900	AT1G09155	AT1G02410	AT5G24780		AT5G07460	AT1G76410		AT1G79700	AT1G02410
AT3G49270	AT3G58990	AT1G02450	AT3G51240		AT3G48280	AT1G75590		AT1G12420	AT1G02450
AT1G07820	AT5G24270	AT1G02460	AT4G23800		AT4G34135	AT5G63860		AT2G28110	AT1G02460
AT1G62500	AT2G35920	AT1G02470	AT2G33620		AT4G36988	AT4G01410		AT5G47610	AT1G02470
AT5G10390	AT2G38940	AT1G02475	AT4G21990		AT1G22370	AT2G46980		AT3G48100	AT1G02475
AT4G14130	AT5G56870	AT1G02490	AT2G18050		AT3G22740	AT2G16440		AT2G22800	AT1G02490
AT5G48180	AT5G46750	AT1G02500	AT5G13930		AT2G18360	AT4G34730		AT5G10040	AT1G02500
AT5G59870	AT1G03620	AT1G02510	AT5G03545		AT5G33370	AT2G28350		AT2G17880	AT1G02510
AT2G36590	AT4G04020	AT1G02560	AT2G16260		AT5G38710	AT2G47910		AT5G65080	AT1G02560
AT2G28740	AT4G22780	AT1G02610	AT2G18969		AT1G78370	AT3G05830		AT4G24120	AT1G02610
AT3G49570	AT2G38900	AT1G02620	AT5G06150		AT4G19520	AT5G62140		AT5G01300	AT1G02620
AT2G15090	AT4G14040	AT1G02640	AT1G51170		AT3G49120	AT2G18970		AT1G24100	AT1G02640
AT4G18960	AT5G39890	AT1G02660	AT2G37620		AT3G57690	AT4G28080		AT4G17900	AT1G02660
AT4G23810	AT1G44970	AT1G02670	AT4G11080		AT4G01680	AT2G04160		AT1G65480	AT1G02670
AT5G25120	AT3G54820	AT1G02690	AT3G63300		AT1G69880	AT5G06440		AT3G11430	AT1G02690
AT2G20870	AT1G16410	AT1G02720	AT1G25530		AT3G22620	AT3G18780		AT4G36990	AT1G02720
AT4G24050	AT4G39940	AT1G02740	AT5G25130		AT5G39580	AT1G68862		AT2G41640	AT1G02740
AT5G48485	AT3G28580	AT1G02780	AT5G46780		AT4G21850	AT2G41680		AT2G46650	AT1G02780
AT1G02300	AT1G62560	AT1G02800	AT3G54180		AT5G05960	AT1G04770		AT2G20610	AT1G02800
AT2G46680	AT1G62480	AT1G02816	AT3G63130		AT1G28230	AT1G21540		AT1G01480	AT1G02816
AT1G06080	AT1G68825	AT1G02830	AT1G72670		AT1G56100	AT5G10440		AT1G01610	AT1G02830
AT4G36220	AT5G42180	AT1G02840	AT1G72970		AT1G17960	AT2G31070		AT5G11060	AT1G02840
AT2G42990	AT5G06170	AT1G02880	AT5G55690		AT1G65860	AT2G16676		AT5G53750	AT1G02880
AT3G45980	AT2G16060	AT1G02900	AT2G15120		AT3G06770	AT2G26750		AT5G63160	AT1G02900
AT5G58280	AT2G37130	AT1G02940	AT4G23750		AT1G22230	AT1G14770		AT1G55330	AT1G02940
AT5G25090	AT2G32510	AT1G02960	AT1G32450		AT3G47480	AT3G16980		AT1G80130	AT1G02960
AT1G12350	AT4G10265	AT1G03030	AT2G46730		AT2G39310	AT1G07790		AT1G77210	AT1G03030
AT4G37410	AT1G59730	AT1G03040	AT5G51590		AT4G19500	AT5G10980		AT1G03610	AT1G03040
AT1G07660	AT1G05680	AT1G03060	AT2G34490		AT2G26690	AT1G01320		AT1G32170	AT1G03060
AT4G13690	AT3G19680	AT1G03080	AT5G64910		AT5G15120	AT2G27770		AT4G19420	AT1G03080
AT4G39330	AT2G17710	AT1G03110	AT1G50110		AT4G03050	AT5G05080		AT1G70670	AT1G03110
AT1G13290	AT5G26310	AT1G03150	AT3G53940		AT3G20300	AT1G73600		AT4G04630	AT1G03150
AT3G18550	AT2G41905	AT1G03160	AT4G00870		AT1G74090	AT1G01490		AT3G49930	AT1G03160
AT5G24660	AT5G55050	AT1G03180	AT1G63710		AT3G11230	AT3G52820		AT5G15265	AT1G03180
AT5G03680	AT5G49630	AT1G03200	AT5G47450		AT1G01290	AT1G63480		AT2G47280	AT1G03200
AT5G67110	AT4G37870	AT1G03220	AT3G27280		AT5G24770	AT1G02340		AT5G66690	AT1G03220
AT4G26740	AT5G24590	AT1G03230	AT3G15000		AT3G13400	AT5G23100		AT5G10140	AT1G03230
AT5G48850	AT3G44990	AT1G03250	AT1G09815		AT5G03930	AT3G48990		AT1G74840	AT1G03250
AT4G08910	AT1G63420	AT1G03300	AT3G12320		AT3G01270	AT1G62180		AT1G52342	AT1G03300
AT5G40950	AT2G33510	AT1G03365	AT4G16690		AT5G24150	AT2G18740		AT1G07000	AT1G03365
AT1G49430	AT1G66570	AT1G03430	AT5G23760		AT5G18860	AT2G44830		AT4G30530	AT1G03430
AT2G03505	AT1G05100	AT1G03457	AT4G04830		AT5G52390	AT3G16190		AT5G66985	AT1G03457
AT5G62000	AT5G59120	AT1G03470	AT3G61850		AT3G27880	AT5G03390		AT1G35260	AT1G03470
AT2G22680	AT1G07430	AT1G03475	AT5G44020		AT3G29370			AT5G21105	AT1G03475
AT1G09200	AT5G46760	AT1G03490	AT3G46940		AT4G18540			AT3G57040	AT1G03490
AT2G36730	AT1G70890	AT1G03510	AT1G32670		AT5G45880			AT4G23010	AT1G03510
AT5G59970	AT1G23440	AT1G03530	AT5G35490		AT2G18300			AT3G44735	AT1G03530
AT4G02060	AT5G60760	AT1G03560	AT1G07370		AT5G28020			AT5G28300	AT1G03560
AT3G53190	AT1G77590	AT1G03600	AT5G03870		AT5G52450			AT5G44730	AT1G03600
AT3G55880	AT4G31820	AT1G03680	AT1G31335		AT1G56660			AT1G33440	AT1G03680
AT1G22590	AT1G70680	AT1G03730	AT3G27360		AT1G06830			AT4G35770	AT1G03730
AT4G23680	AT4G24275	AT1G03740	AT5G13840		AT1G59620			AT2G20880	AT1G03740
AT4G02520	AT4G16130	AT1G03750	AT1G29980		AT2G32550			AT3G14990	AT1G03750
AT1G78000	AT2G22190	AT1G03760	AT5G54600		AT4G29310			AT2G39800	AT1G03760
AT5G42680	AT1G10470	AT1G03770	AT1G73602		AT5G19160			AT2G40260	AT1G03770
AT3G15270	AT1G24520	AT1G03780	AT1G62780		AT2G47040			AT5G48880	AT1G03780
AT5G56300	AT3G05020	AT1G03790	AT5G56500		AT5G44120			AT2G47050	AT1G03790
AT2G27970	AT1G09560	AT1G03800	AT3G51290		AT5G64000			AT2G46330	AT1G03800
AT4G21590	AT4G34750	AT1G03830	AT1G53070		AT4G34290			AT3G50700	AT1G03830
AT2G26180	AT1G64370	AT1G03840	AT2G16660		AT1G35230			AT4G34680	AT1G03840
AT1G11850	AT4G13770	AT1G03850	AT1G25340		AT1G50290			AT4G38410	AT1G03850
AT2G28790	AT5G26340	AT1G03860	AT5G44635		AT1G11785			AT2G25490	AT1G03860
AT3G16180	AT5G26000	AT1G03870	AT4G22540		AT3G55646			AT2G28400	AT1G03870
AT2G38230	AT5G24655	AT1G03905	AT1G71500		AT4G23600			AT5G58650	AT1G03905
AT3G14740	AT3G25640	AT1G03940	AT3G07800		AT1G78460			AT1G12200	AT1G03940
AT1G14900	AT4G15530	AT1G03982	AT5G49020		AT3G45730			AT2G38250	AT1G03982
AT5G61030	AT2G28840	AT1G04000	AT1G74790		AT2G38640			AT3G10300	AT1G04000
AT4G35640	AT5G10430	AT1G04020	AT3G02210		AT3G54600			AT2G34790	AT1G04020
AT2G28720	AT3G13520	AT1G04050	AT5G67390		ATMG00580			AT1G07590	AT1G04050
AT5G19290	AT1G78780	AT1G04080	AT1G27590		AT1G08465			AT4G32870	AT1G04080
AT3G25480	AT1G72430	AT1G04120	AT2G35410		AT1G49320			AT5G04860	AT1G04120
AT2G46720	AT5G14200	AT1G04130	AT1G52500		AT1G04250			AT2G18890	AT1G04130
AT2G26740	AT3G02550	AT1G04150	AT2G28380		AT1G66240			AT3G11110	AT1G04150
AT1G17200	AT1G67865	AT1G04160	AT5G22750		AT1G07600			AT4G34050	AT1G04160
AT2G16570	AT1G79700	AT1G04190	AT5G05690		AT1G76240			AT1G06160	AT1G04190
AT4G26150	AT5G23010	AT1G04210	AT5G32460		AT4G38860			AT1G09810	AT1G04210
AT4G27230	AT1G12420	AT1G04230	AT2G21790		AT1G18590			AT5G63370	AT1G04230
AT2G29980	AT5G19550	AT1G04260	AT2G28760		AT1G52280			AT4G24000	AT1G04260
AT1G19330	AT5G10625	AT1G04280	AT5G63650		AT1G05310			AT1G20980	AT1G04280
AT3G04990	AT2G28110	AT1G04310	AT5G60200		AT4G24580			AT1G70230	AT1G04310
AT1G30600	AT5G47610	AT1G04350
AT2G27040	AT3G48100	AT1G04360
AT1G02110	AT3G05640	AT1G04410
AT4G29020	AT5G25120	AT1G04440
AT5G24780	AT4G14480	AT1G04480
AT3G54000	AT2G43550	AT1G04510
AT3G51240	AT4G08480	AT1G04520
AT4G23800	AT1G33055	AT1G04540
AT3G23830	AT1G62333	AT1G04550
AT1G46480	AT3G62540	AT1G04570
AT2G36090	AT5G17860	AT1G04580
AT1G51680	AT1G13110	AT1G04590
AT2G33620	AT2G22800	AT1G04610
AT4G21990	AT4G08555	AT1G04635
AT2G18050	AT4G17030	AT1G04680
AT5G13930	AT5G10040	AT1G04690
AT5G49100	AT1G71710	AT1G04700
AT5G03545	AT2G17880	AT1G04710
AT2G16260	AT5G65080	AT1G04730
AT2G18969	AT1G76650	AT1G04750
AT5G06150	AT1G22530	AT1G04778
AT4G08480	AT4G24120	AT1G04780
AT4G16610	AT5G01300	AT1G04790
AT5G24270	AT1G24100	AT1G04810
AT2G36120	AT4G12970	AT1G04820
AT1G51170	AT3G26140	AT1G04860
AT5G15530	AT1G64780	AT1G04920
AT2G42800	AT4G30110	AT1G04930
AT2G37620	AT5G23020	AT1G04950
AT5G10580	AT5G07460	AT1G04960
AT4G11080	AT4G17900	AT1G04990
AT3G63300	AT3G48280	AT1G05010
AT1G25530	AT1G65480	AT1G05070
AT5G25130	AT3G11430	AT1G05085
AT5G01240	AT4G34135	AT1G05087
AT5G46780	AT4G36988	AT1G05090
AT3G54180	AT4G36990	AT1G05120
AT3G63130	AT1G22370	AT1G05140
AT5G14640	AT3G22740	AT1G05170
AT1G72670	AT2G18360	AT1G05180
AT5G60760	AT5G44630	AT1G05190
AT4G37870	AT2G41640	AT1G05240
AT1G17190	AT2G46650	AT1G05260
AT1G72970	AT5G33370	AT1G05270
AT5G55690	AT2G20610	AT1G05300
AT1G76410	AT5G38710	AT1G05320
AT1G75590	AT1G78370	AT1G05340
AT2G15120	AT4G19520	AT1G05350
AT5G63860	AT1G01480	AT1G05360
AT4G23750	AT1G01610	AT1G05370
AT1G32450	AT3G49120	AT1G05380
AT2G36190	AT3G57690	AT1G05410
AT4G01410	AT4G01680	AT1G05470
AT2G46730	AT5G11060	AT1G05490
AT5G51590	AT1G69880	AT1G05540
AT2G34490	AT5G53750	AT1G05560
AT2G46980	AT5G22500	AT1G05570
AT2G16440	AT3G22620	AT1G05575
AT5G64910	AT5G63160	AT1G05660
AT4G34730	AT1G55330	AT1G05670
AT2G28350	AT5G39580	AT1G05700
AT2G47910	AT1G80130	AT1G05710
AT1G50110	AT4G21850	AT1G05783
AT3G53940	AT1G77210	AT1G05785
AT4G00870	AT1G03610	AT1G05805
AT1G63710	AT5G05960	AT1G05860
AT3G05830	AT1G06080	AT1G05870
AT5G47450	AT1G28230	AT1G05890
AT3G27280	AT1G56100	AT1G05930
AT3G15000	AT1G32170	AT1G05940
AT5G62140	AT1G17960	AT1G05960
AT2G18970	AT1G65860	AT1G05970
AT1G09815	AT1G32540	AT1G06000
AT4G28080	AT4G19420	AT1G06045
AT2G04160	AT3G06770	AT1G06070
AT3G12320	AT1G70670	AT1G06110
AT5G06440	AT4G04630	AT1G06148
AT3G18780	AT1G22230	AT1G06170
AT1G68862	AT2G46680	AT1G06180
AT1G71710	AT3G49930	AT1G06190
AT2G41680	AT5G15265	AT1G06200
AT4G16690	AT2G47280	AT1G06230
AT5G23760	AT3G27940	AT1G06290
AT1G04770	AT3G47480	AT1G06310
AT4G04830	AT5G66690	AT1G06340
AT1G21540	AT2G39310	AT1G06380
AT5G10440	AT4G19500	AT1G06400
AT2G31070	AT2G26690	AT1G06410
AT3G61850	AT5G15120	AT1G06420
AT5G44020	AT4G03050	AT1G06475
AT4G26850	AT5G10140	AT1G06500
AT3G46940	AT1G74840	AT1G06515
AT1G32670	AT3G20300	AT1G06520
AT2G16676	AT1G52342	AT1G06530
AT5G35490	AT1G74090	AT1G06550
AT1G07370	AT1G07000	AT1G06580
AT5G03870	AT4G30530	AT1G06590
AT2G26750	AT5G66985	AT1G06660
AT1G31335	AT1G70830	AT1G06680
AT3G27360	AT1G35260	AT1G06700
AT5G13840	AT3G11230	AT1G06710
AT1G29980	AT1G01290	AT1G06740
AT1G14770	AT5G21105	AT1G06760
AT3G16980	AT5G24770	AT1G06780
AT1G07790	AT3G57040	AT1G06790
AT5G10980	AT4G23010	AT1G06800
AT5G54600	AT3G13400	AT1G06850
AT1G01320	AT5G03930	AT1G06910
AT2G27770	AT3G44735	AT1G06923
AT5G05080	AT3G01270	AT1G06970
AT1G73602	AT5G28300	AT1G06980
AT1G73600	AT5G44730	AT1G06990
AT1G62780	AT5G24150	AT1G07020
AT3G54820	AT5G18860	AT1G07040
AT1G01490	AT5G52390	AT1G07070
AT5G56500	AT1G33440	AT1G07090
AT3G51290	AT3G27880	AT1G07110
AT1G53070	AT3G29370	AT1G07130
AT2G16660	AT4G35770	AT1G07140
AT3G52820	AT2G20880	AT1G07150
AT1G63480	AT3G14990	AT1G07170
AT1G25340	AT2G39800	AT1G07180
AT5G44635	AT4G18540	AT1G07200
AT1G61810	AT2G40260	AT1G07210
AT4G22540	AT5G45880	AT1G07220
AT1G71500	AT5G48880	AT1G07240
AT1G02340	AT2G18300	AT1G07260
AT1G32540	AT1G62500	AT1G07280
AT3G07800	AT5G28020	AT1G07350
AT5G49020	AT5G52450	AT1G07380
AT1G74790	AT2G47050	AT1G07420
AT3G02210	AT1G56660	AT1G07460
AT5G67390	AT1G06830	AT1G07500
AT1G27590	AT2G46330	AT1G07510
AT2G35410	AT3G50700	AT1G07530
AT5G23100	AT1G59620	AT1G07540
AT1G52500	AT2G32550	AT1G07550
AT2G28380	AT4G29310	AT1G07570
AT3G48990	AT5G19160	AT1G07610
AT1G62180	AT2G47040	AT1G07620
AT5G22750	AT4G34680	AT1G07630
AT5G05690	AT5G44120	AT1G07650
AT2G18740	AT5G64000	AT1G07645
AT5G32460	AT4G34290	AT1G07670
AT2G21790	AT1G35230	AT1G07680
AT2G28760	AT4G38410	AT1G07725
AT5G63650	AT1G50290	AT1G07745
AT2G44830	AT2G25490	AT1G07770
AT5G60200	AT1G11785	AT1G07780
AT3G16190	AT3G55646	AT1G07810
AT5G03390	AT4G23600	AT1G07830
AT3G27940	AT5G10180	AT1G07870
AT5G10180	AT2G28400	AT1G07880
AT5G47060	AT1G78460	AT1G07885
	AT5G58650	AT1G07902
	AT1G12200	AT1G07920
	AT3G45730	AT1G07930
	AT2G38640	AT1G07940
	AT3G54600	AT1G07950
	AT2G38250	AT1G07980
	AT3G10300	AT1G07990
	AT2G34790	AT1G08000
	ATMG00580	AT1G08005
	AT1G08465	AT1G08010
	AT1G49320	AT1G08030
	AT4G26850	AT1G08040
	AT1G07590	AT1G08070
	AT4G32870	AT1G08080
	AT5G04860	AT1G08100
	AT2G18890	AT1G08110
	AT3G11110	AT1G08130
	AT4G34050	AT1G08135
	AT1G06160	AT1G08165
	AT1G04250	AT1G08180
	AT1G66240	AT1G08190
	AT1G07600	AT1G08200
	AT1G76240	AT1G08220
	AT1G22590	AT1G08250
	AT4G38860	AT1G08270
	AT1G18590	AT1G08320
	AT1G09810	AT1G08340
	AT1G52280	AT1G08350
	AT5G63370	AT1G08400
	AT4G24000	AT1G08420
	AT1G20980	AT1G08460
	AT2G22680	AT1G08470
	AT1G05310	AT1G08490
	AT1G70230	AT1G08510
	AT4G24580	AT1G08520
	AT5G62430	AT1G08560
	AT5G39160	AT1G08570
	AT5G02090	AT1G08590
	AT1G59700	AT1G08610
	AT5G39190	AT1G08630
	AT1G29460	AT1G08640
	AT2G37760	AT1G08650
	AT1G78110	AT1G08660
	AT1G77120	AT1G08680
	AT3G61890	AT1G08710
	AT4G24130	AT1G08720
	AT5G46740	AT1G08760
	AT2G22540	AT1G08780
	AT2G32150	AT1G08800
	AT5G65140	AT1G08810
	AT3G11930	AT1G08820
	AT1G61810	AT1G08910
	AT3G25290	AT1G08920
	AT4G17340	AT1G08960
	AT2G04170	AT1G08970
	AT5G15140	AT1G09040
	AT3G58010	AT1G09050
	AT1G76890	AT1G09070
	AT3G49540	AT1G09140
	AT5G22390	AT1G09230
	AT5G64770	AT1G09245
	AT2G42570	AT1G09330
	AT5G14330	AT1G09390
	AT2G23690	AT1G09430
	AT3G23170	AT1G09480
	AT5G07010	AT1G09490
	AT4G10260	AT1G09520
	AT1G64130	AT1G09530
	AT1G19960	AT1G09550
	AT5G17700	AT1G09570
	AT5G17450	AT1G09575
	AT5G57880	AT1G09580
	AT4G12030	AT1G09620
	AT4G25940	AT1G09630
	AT2G44980	AT1G09660
	AT1G72645	AT1G09690
	AT4G11320	AT1G09710
	AT5G44350	AT1G09794
	AT4G27450	AT1G09812
	AT1G53170	AT1G09840
	AT4G21800	AT1G09850
	AT3G26330	AT1G09870
	AT3G14270	AT1G09920
	AT5G25890	AT1G09940
	AT5G53250	AT1G09950
	AT1G44542	AT1G09960
	AT1G67100	AT1G09970
	AT2G30040	AT1G09980
	AT5G50950	AT1G10010
	AT5G52640	AT1G10020
	AT5G40780	AT1G10030
	AT4G37760	AT1G10040
	AT1G49940	AT1G10090
	AT5G52310	AT1G10110
	AT3G19400	AT1G10120
	AT5G14380	AT1G10150
	AT2G03120	AT1G10170
	AT5G54400	AT1G10180
	AT1G29510	AT1G10200
	AT1G67900	AT1G10210
	AT4G11070	AT1G10220
	AT3G17998	AT1G10225
	AT3G18000	AT1G10230
	AT5G16970	AT1G10240
	AT1G69490	AT1G10270
	AT3G10120	AT1G10290
	AT4G36090	AT1G10360
	AT3G26520	AT1G10370
	AT5G54800	AT1G10390
	AT5G66630	AT1G10410
	AT5G45550	AT1G10417
	AT1G02400	AT1G10430
	AT3G01530	AT1G10500
	AT2G39250	AT1G10540
	AT4G18580	AT1G10550
	AT5G57785	AT1G10560
	AT4G37790	AT1G10590
	AT2G38500	AT1G10650
	AT4G17800	AT1G10657
	AT3G62550	AT1G10660
	AT4G28775	AT1G10680
	AT4G36670	AT1G10710
	AT2G14750	AT1G10740
	AT5G40960	AT1G10840
	AT2G47130	AT1G10865
	AT2G42380	AT1G10890
	AT4G38840	AT1G10910
	AT1G12090	AT1G10940
	AT1G33960	AT1G10950
	AT5G43260	AT1G10960
	AT5G62990	AT1G11090
	AT3G47650	AT1G11120
	AT4G29905	AT1G11125
	AT5G56795	AT1G11130
	AT2G41260	AT1G11170
	AT4G36920	AT1G11180
	AT1G15260	AT1G11210
	AT3G02310	AT1G11220
	AT5G67340	AT1G11230
	AT2G07688	AT1G11250
	AT5G35111	AT1G11260
	AT3G26450	AT1G11400
	AT4G37295	AT1G11430
	AT5G55450	AT1G11560
	AT2G16200	AT1G11590
	AT4G34760	AT1G11591
		AT1G11610
		AT1G11660
		AT1G11670
		AT1G11680
		AT1G11690
		AT1G11700
		AT1G11710
		AT1G11730
		AT1G11750
		AT1G11840
		AT1G11860
		AT1G11890
		AT1G11910
		AT1G11940
		AT1G11950
		AT1G11960
		AT1G11970
		AT1G12000
		AT1G12010
		AT1G12020
		AT1G12070
		AT1G12080
		AT1G12100
		AT1G12110
		AT1G12120
		AT1G12140
		AT1G12210
		AT1G12230
		AT1G12240
		AT1G12270
		AT1G12290
		AT1G12310
		AT1G12340
		AT1G12380
		AT1G12390
		AT1G12411
		AT1G12430
		AT1G12450
		AT1G12460
		AT1G12500
		AT1G12520
		AT1G12530
		AT1G12540
		AT1G12560
		AT1G12570
		AT1G12580
		AT1G12610
		AT1G12680
		AT1G12760
		AT1G12770
		AT1G12790
		AT1G12800
		AT1G12810
		AT1G12820
		AT1G12840
		AT1G12830
		AT1G12900
		AT1G12930
		AT1G12950
		AT1G12960
		AT1G12980
		AT1G12990
		AT1G13020
		AT1G13090
		AT1G13140
		AT1G13170
		AT1G13195
		AT1G13220
		AT1G13230
		AT1G13245
		AT1G13250
		AT1G13260
		AT1G13270
		AT1G13280
		AT1G13330
		AT1G13350
		AT1G13360
		AT1G13370
		AT1G13380
		AT1G13390
		AT1G13440
		AT1G13470
		AT1G13600
		AT1G13635
		AT1G13690
		AT1G13700
		AT1G13730
		AT1G13830
		AT1G13860
		AT1G13870
		AT1G13950
		AT1G13960
		AT1G13980
		AT1G14000
		AT1G14010
		AT1G14040
		AT1G14150
		AT1G14160
		AT1G14280
		AT1G14300
		AT1G14315
		AT1G14330
		AT1G14340
		AT1G14360
		AT1G14380
		AT1G14410
		AT1G14450
		AT1G14490
		AT1G14510
		AT1G14570
		AT1G14590
		AT1G14620
		AT1G14630
		AT1G14650
		AT1G14670
		AT1G14680
		AT1G14687
		AT1G14688
		AT1G14690
		AT1G14710
		AT1G14720
		AT1G14730
		AT1G14740
		AT1G14750
		AT1G14790
		AT1G14800
		AT1G14840
		AT1G14860
		AT1G14870
		AT1G14890
		AT1G14910
		AT1G14920
		AT1G14980
		AT1G14990
		AT1G15010
		AT1G15020
		AT1G15030
		AT1G15060
		AT1G15100
		AT1G15110
		AT1G15120
		AT1G15140
		AT1G15165
		AT1G15200
		AT1G15220
		AT1G15240
		AT1G15270
		AT1G15320
		AT1G15350
		AT1G15370
		AT1G15380
		AT1G15390
		AT1G15400
		AT1G15410
		AT1G15420
		AT1G15430
		AT1G15440
		AT1G15460
		AT1G15500
		AT1G15530
		AT1G15570
		AT1G15660
		AT1G15670
		AT1G15680
		AT1G15690
		AT1G15700
		AT1G15710
		AT1G15740
		AT1G15750
		AT1G15757
		AT1G15760
		AT1G15800
		AT1G15810
		AT1G15820
		AT1G15860
		AT1G15910
		AT1G15930
		AT1G15960
		AT1G15980
		AT1G16000
		AT1G16030
		AT1G16150
		AT1G16170
		AT1G16180
		AT1G16210
		AT1G16240
		AT1G16270
		AT1G16290
		AT1G16340
		AT1G16350
		AT1G16430
		AT1G16490
		AT1G16500
		AT1G16520
		AT1G16630
		AT1G16640
		AT1G16680
		AT1G16700
		AT1G16710
		AT1G16730
		AT1G16750
		AT1G16770
		AT1G16790
		AT1G16800
		AT1G16825
		AT1G16860
		AT1G16870
		AT1G16900
		AT1G16910
		AT1G16916
		AT1G16920
		AT1G17060
		AT1G17090
		AT1G17100
		AT1G17110
		AT1G17120
		AT1G17180
		AT1G17235
		AT1G17280
		AT1G17290
		AT1G17350
		AT1G17370
		AT1G17380
		AT1G17400
		AT1G17420
		AT1G17440
		AT1G17455
		AT1G17460
		AT1G17480
		AT1G17500
		AT1G17530
		AT1G17545
		AT1G17580
		AT1G17615
		AT1G17620
		AT1G17710
		AT1G17720
		AT1G17730
		AT1G17830
		AT1G17840
		AT1G17890
		AT1G17940
		AT1G17950
		AT1G17970
		AT1G18020
		AT1G18070
		AT1G18080
		AT1G18140
		AT1G18150
		AT1G18200
		AT1G18210
		AT1G18280
		AT1G18300
		AT1G18310
		AT1G18330
		AT1G18340
		AT1G18370
		AT1G18390
		AT1G18400
		AT1G18420
		AT1G18460
		AT1G18470
		AT1G18480
		AT1G18510
		AT1G18540
		AT1G18550
		AT1G18560
		AT1G18600
		AT1G18670
		AT1G18700
		AT1G18710
		AT1G18730
		AT1G18740
		AT1G18750
		AT1G18800
		AT1G18830
		AT1G18840
		AT1G18860
		AT1G18900
		AT1G18970
		AT1G18980
		AT1G19000
		AT1G19050
		AT1G19080
		AT1G19110
		AT1G19150
		AT1G19180
		AT1G19210
		AT1G19220
		AT1G19230
		AT1G19310
		AT1G19340
		AT1G19350
		AT1G19370
		AT1G19380
		AT1G19430
		AT1G19460
		AT1G19480
		AT1G19485
		AT1G19500
		AT1G19540
		AT1G19580
		AT1G19600
		AT1G19650
		AT1G19670
		AT1G19710
		AT1G19770
		AT1G19800
		AT1G19835
		AT1G19840
		AT1G19850
		AT1G19870
		AT1G19880
		AT1G19890
		AT1G19930
		AT1G19980
		AT1G20010
		AT1G20030
		AT1G20060
		AT1G20070
		AT1G20080
		AT1G20090
		AT1G20110
		AT1G20160
		AT1G20270
		AT1G20300
		AT1G20340
		AT1G20350
		AT1G20370
		AT1G20380
		AT1G20430
		AT1G20440
		AT1G20450
		AT1G20460
		AT1G20490
		AT1G20510
		AT1G20540
		AT1G20550
		AT1G20570
		AT1G20575
		AT1G20610
		AT1G20620
		AT1G20630
		AT1G20640
		AT1G20650
		AT1G20670
		AT1G20690
		AT1G20696
		AT1G20760
		AT1G20780
		AT1G20823
		AT1G20850
		AT1G20875
		AT1G20890
		AT1G20900
		AT1G20910
		AT1G20960
		AT1G20990
		AT1G21000
		AT1G21050
		AT1G21065
		AT1G21080
		AT1G21150
		AT1G21200
		AT1G21250
		AT1G21270
		AT1G21320
		AT1G21360
		AT1G21390
		AT1G21400
		AT1G21440
		AT1G21450
		AT1G21460
		AT1G21480
		AT1G21530
		AT1G21560
		AT1G21580
		AT1G21600
		AT1G21630
		AT1G21640
		AT1G21660
		AT1G21670
		AT1G21722
		AT1G21730
		AT1G21740
		AT1G21738
		AT1G21750
		AT1G21780
		AT1G21810
		AT1G21830
		AT1G21835
		AT1G21880
		AT1G21890
		AT1G21900
		AT1G21910
		AT1G21920
		AT1G21925
		AT1G21970
		AT1G21980
		AT1G21990
		AT1G22030
		AT1G22050
		AT1G22060
		AT1G22065
		AT1G22070
		AT1G22160
		AT1G22180
		AT1G22210
		AT1G22275
		AT1G22280
		AT1G22310
		AT1G22410
		AT1G22440
		AT1G22460
		AT1G22480
		AT1G22520
		AT1G22540
		AT1G22600
		AT1G22620
		AT1G22630
		AT1G22640
		AT1G22650
		AT1G22700
		AT1G22770
		AT1G22830
		AT1G22880
		AT1G22920
		AT1G22930
		AT1G22980
		AT1G22985
		AT1G22990
		AT1G23000
		AT1G23020
		AT1G23030
		AT1G23040
		AT1G23060
		AT1G23070
		AT1G23080
		AT1G23090
		AT1G23100
		AT1G23190
		AT1G23205
		AT1G23220
		AT1G23280
		AT1G23290
		AT1G23310
		AT1G23360
		AT1G23380
		AT1G23390
		AT1G23480
		AT1G23550
		AT1G23710
		AT1G23750
		AT1G23770
		AT1G23780
		AT1G23810
		AT1G23820
		AT1G23860
		AT1G23870
		AT1G23965
		AT1G23980
		AT1G24000
		AT1G24040
		AT1G24070
		AT1G24095
		AT1G24120
		AT1G24130
		AT1G24170
		AT1G24180
		AT1G24260
		AT1G24265
		AT1G24267
		AT1G24280
		AT1G24440
		AT1G24460
		AT1G24530
		AT1G24540
		AT1G24577
		AT1G24600
		AT1G24625
		AT1G24650
		AT1G24706
		AT1G24764
		AT1G24851
		AT1G25025
		AT1G25097
		AT1G25112
		AT1G25180
		AT1G25220
		AT1G25230
		AT1G25250
		AT1G25260
		AT1G25330
		AT1G25370
		AT1G25375
		AT1G25425
		AT1G25440
		AT1G25450
		AT1G25480
		AT1G25490
		AT1G25500
		AT1G25510
		AT1G25520
		AT1G25540
		AT1G25550
		AT1G25560
		AT1G25570
		AT1G25580
		AT1G25682
		AT1G26090
		AT1G26100
		AT1G26110
		AT1G26170
		AT1G26230
		AT1G26240
		AT1G26270
		AT1G26300
		AT1G26330
		AT1G26370
		AT1G26460
		AT1G26470
		AT1G26540
		AT1G26570
		AT1G26590
		AT1G26620
		AT1G26630
		AT1G26740
		AT1G26773
		AT1G26790
		AT1G26800
		AT1G26820
		AT1G26840
		AT1G26910
		AT1G26920
		AT1G26921
		AT1G26930
		AT1G26940
		AT1G26960
		AT1G27045
		AT1G27100
		AT1G27130
		AT1G27140
		AT1G27200
		AT1G27210
		AT1G27220
		AT1G27290
		AT1G27310
		AT1G27320
		AT1G27330
		AT1G27340
		AT1G27350
		AT1G27360
		AT1G27370
		AT1G27390
		AT1G27400
		AT1G27440
		AT1G27540
		AT1G27640
		AT1G27760
		AT1G27840
		AT1G27850
		AT1G27890
		AT1G27920
		AT1G27930
		AT1G27940
		AT1G27980
		AT1G28050
		AT1G28060
		AT1G28080
		AT1G28090
		AT1G28100
		AT1G28110
		AT1G28120
		AT1G28130
		AT1G28135
		AT1G28140
		AT1G28250
		AT1G28265
		AT1G28260
		AT1G28280
		AT1G28290
		AT1G28300
		AT1G28320
		AT1G28335
		AT1G28360
		AT1G28380
		AT1G28430
		AT1G28440
		AT1G28490
		AT1G28630
		AT1G28640
		AT1G28680
		AT1G28960
		AT1G29050
		AT1G29060
		AT1G29070
		AT1G29220
		AT1G29230
		AT1G29260
		AT1G29270
		AT1G29290
		AT1G29300
		AT1G29330
		AT1G29340
		AT1G29355
		AT1G29390
		AT1G29400
		AT1G29440
		AT1G29470
		AT1G29490
		AT1G29550
		AT1G29630
		AT1G29660
		AT1G29870
		AT1G29880
		AT1G29970
		AT1G30010
		AT1G30040
		AT1G30050
		AT1G30070
		AT1G30080
		AT1G30090
		AT1G30110
		AT1G30120
		AT1G30130
		AT1G30190
		AT1G30200
		AT1G30210
		AT1G30230
		AT1G30240
		AT1G30280
		AT1G30300
		AT1G30320
		AT1G30330
		AT1G30350
		AT1G30360
		AT1G30370
		AT1G30380
		AT1G30400
		AT1G30480
		AT1G30500
		AT1G30520
		AT1G30540
		AT1G30550
		AT1G30560
		AT1G30570
		AT1G30610
		AT1G30620
		AT1G30640
		AT1G30650
		AT1G30660
		AT1G30680
		AT1G30690
		AT1G30900
		AT1G31020
		AT1G31040
		AT1G31070
		AT1G31095
		AT1G31130
		AT1G31300
		AT1G31330
		AT1G31340
		AT1G31350
		AT1G31360
		AT1G31420
		AT1G31460
		AT1G31470
		AT1G31760
		AT1G31790
		AT1G31812
		AT1G31814
		AT1G31840
		AT1G31870
		AT1G31880
		AT1G31885
		AT1G31910
		AT1G31930
		AT1G31940
		AT1G32060
		AT1G32090
		AT1G32127
		AT1G32190
		AT1G32210
		AT1G32225
		AT1G32230
		AT1G32240
		AT1G32360
		AT1G32400
		AT1G32500
		AT1G32550
		AT1G32580
		AT1G32610
		AT1G32630
		AT1G32650
		AT1G32690
		AT1G32700
		AT1G32730
		AT1G32750
		AT1G32790
		AT1G32810
		AT1G32910
		AT1G32920
		AT1G32928
		AT1G32930
		AT1G33030
		AT1G33120
		AT1G33140
		AT1G33240
		AT1G33250
		AT1G33270
		AT1G33330
		AT1G33420
		AT1G33710
		AT1G33980
		AT1G33990
		AT1G34000
		AT1G34220
		AT1G34245
		AT1G34340
		AT1G34630
		AT1G34670
		AT1G35140
		AT1G35430
		AT1G35460
		AT1G35467
		AT1G35510
		AT1G35516
		AT1G35660
		AT1G35710
		AT1G35780
		AT1G36980
		AT1G36990
		AT1G37113
		AT1G37150
		AT1G38131
		AT1G40104
		AT1G42430
		AT1G42440
		AT1G42960
		AT1G42990
		AT1G43850
		AT1G43890
		AT1G44170
		AT1G44180
		AT1G44575
		AT1G44740
		AT1G44760
		AT1G44895
		AT1G45130
		AT1G45163
		AT1G45170
		AT1G45230
		AT1G46696
		AT1G47128
		AT1G47130
		AT1G47220
		AT1G47230
		AT1G47240
		AT1G47310
		AT1G47317
		AT1G47330
		AT1G47490
		AT1G47497
		AT1G47530
		AT1G47610
		AT1G47720
		AT1G47740
		AT1G47870
		AT1G47970
		AT1G47990
		AT1G48100
		AT1G48120
		AT1G48270
		AT1G48280
		AT1G48325
		AT1G48330
		AT1G48410
		AT1G48420
		AT1G48440
		AT1G48460
		AT1G48480
		AT1G48520
		AT1G48550
		AT1G48635
		AT1G48750
		AT1G48850
		AT1G48880
		AT1G48953
		AT1G49010
		AT1G49130
		AT1G49150
		AT1G49160
		AT1G49170
		AT1G49225
		AT1G49240
		AT1G49245
		AT1G49380
		AT1G49410
		AT1G49420
		AT1G49450
		AT1G49480
		AT1G49510
		AT1G49560
		AT1G49600
		AT1G49610
		AT1G49620
		AT1G49660
		AT1G49700
		AT1G49710
		AT1G49720
		AT1G49740
		AT1G49750
		AT1G49780
		AT1G49810
		AT1G49840
		AT1G49850
		AT1G49880
		AT1G49890
		AT1G49910
		AT1G50010
		AT1G50020
		AT1G50040
		AT1G50140
		AT1G50325
		AT1G50340
		AT1G50360
		AT1G50420
		AT1G50450
		AT1G50480
		AT1G50600
		AT1G50640
		AT1G50650
		AT1G50660
		AT1G50830
		AT1G51130
		AT1G51140
		AT1G51160
		AT1G51230
		AT1G51310
		AT1G51320
		AT1G51330
		AT1G51400
		AT1G51460
		AT1G51500
		AT1G51510
		AT1G51550
		AT1G51570
		AT1G51630
		AT1G51640
		AT1G51650
		AT1G51660
		AT1G51690
		AT1G51700
		AT1G51745
		AT1G51940
		AT1G51950
		AT1G52080
		AT1G52180
		AT1G52190
		AT1G52245
		AT1G52290
		AT1G52300
		AT1G52540
		AT1G52550
		AT1G52565
		AT1G52570
		AT1G52618
		AT1G52620
		AT1G52640
		AT1G52670
		AT1G52730
		AT1G52760
		AT1G52770
		AT1G52810
		AT1G52855
		AT1G52870
		AT1G52880
		AT1G52890
		AT1G52900
		AT1G52980
		AT1G53090
		AT1G53200
		AT1G53210
		AT1G53230
		AT1G53240
		AT1G53250
		AT1G53282
		AT1G53290
		AT1G53310
		AT1G53320
		AT1G53360
		AT1G53380
		AT1G53400
		AT1G53430
		AT1G53470
		AT1G53500
		AT1G53510
		AT1G53580
		AT1G53650
		AT1G53670
		AT1G53690
		AT1G53710
		AT1G53730
		AT1G53770
		AT1G53790
		AT1G53830
		AT1G53920
		AT1G54030
		AT1G54050
		AT1G54080
		AT1G54090
		AT1G54110
		AT1G54115
		AT1G54130
		AT1G54140
		AT1G54170
		AT1G54180
		AT1G54200
		AT1G54210
		AT1G54230
		AT1G54240
		AT1G54250
		AT1G54260
		AT1G54290
		AT1G54310
		AT1G54340
		AT1G54360
		AT1G54570
		AT1G54580
		AT1G54630
		AT1G54690
		AT1G54740
		AT1G54850
		AT1G54990
		AT1G55050
		AT1G55120
		AT1G55152
		AT1G55160
		AT1G55190
		AT1G55200
		AT1G55210
		AT1G55265
		AT1G55340
		AT1G55350
		AT1G55360
		AT1G55365
		AT1G55475
		AT1G55500
		AT1G55510
		AT1G55535
		AT1G55540
		AT1G55590
		AT1G55610
		AT1G55620
		AT1G55675
		AT1G55680
		AT1G55700
		AT1G55770
		AT1G55830
		AT1G55960
		AT1G56020
		AT1G56030
		AT1G56045
		AT1G56070
		AT1G56120
		AT1G56145
		AT1G56170
		AT1G56180
		AT1G56210
		AT1G56220
		AT1G56225
		AT1G56230
		AT1G56233
		AT1G56240
		AT1G56250
		AT1G56260
		AT1G56310
		AT1G56320
		AT1G56350
		AT1G56423
		AT1G56430
		AT1G56450
		AT1G56460
		AT1G56570
		AT1G56590
		AT1G56600
		AT1G56630
		AT1G56700
		AT1G56720
		AT1G57600
		AT1G57680
		AT1G57760
		AT1G57765
		AT1G57860
		AT1G58070
		AT1G58080
		AT1G58110
		AT1G58180
		AT1G58210
		AT1G58235
		AT1G58250
		AT1G58470
		AT1G59640
		AT1G59860
		AT1G59870
		AT1G60000
		AT1G60010
		AT1G60030
		AT1G60070
		AT1G60090
		AT1G60140
		AT1G60160
		AT1G60390
		AT1G60430
		AT1G60530
		AT1G60560
		AT1G60590
		AT1G60600
		AT1G60670
		AT1G60770
		AT1G60800
		AT1G60810
		AT1G60860
		AT1G60870
		AT1G60890
		AT1G60900
		AT1G60940
		AT1G60950
		AT1G60970
		AT1G60987
		AT1G61100
		AT1G61110
		AT1G61140
		AT1G61190
		AT1G61215
		AT1G61255
		AT1G61270
		AT1G61330
		AT1G61350
		AT1G61540
		AT1G61560
		AT1G61620
		AT1G61660
		AT1G61667
		AT1G61730
		AT1G61740
		AT1G61780
		AT1G61790
		AT1G61820
		AT1G61890
		AT1G61900
		AT1G61920
		AT1G61930
		AT1G61940
		AT1G61950
		AT1G62050
		AT1G62190
		AT1G62305
		AT1G62310
		AT1G62330
		AT1G62360
		AT1G62370
		AT1G62380
		AT1G62390
		AT1G62421
		AT1G62420
		AT1G62430
		AT1G62450
		AT1G62490
		AT1G62515
		AT1G62620
		AT1G62760
		AT1G62770
		AT1G62830
		AT1G62870
		AT1G62960
		AT1G62970
		AT1G62981
		AT1G62990
		AT1G63010
		AT1G63030
		AT1G63100
		AT1G63120
		AT1G63130
		AT1G63140
		AT1G63170
		AT1G63180
		AT1G63295
		AT1G63390
		AT1G63430
		AT1G63460
		AT1G63490
		AT1G63500
		AT1G63640
		AT1G63670
		AT1G63680
		AT1G63690
		AT1G63700
		AT1G63720
		AT1G63730
		AT1G63820
		AT1G63840
		AT1G63850
		AT1G63855
		AT1G63910
		AT1G63930
		AT1G63950
		AT1G63980
		AT1G64040
		AT1G64050
		AT1G64060
		AT1G64070
		AT1G64080
		AT1G64105
		AT1G64110
		AT1G64150
		AT1G64180
		AT1G64190
		AT1G64200
		AT1G64230
		AT1G64380
		AT1G64385
		AT1G64390
		AT1G64405
		AT1G64450
		AT1G64455
		AT1G64460
		AT1G64490
		AT1G64510
		AT1G64540
		AT1G64570
		AT1G64590
		AT1G64610
		AT1G64620
		AT1G64625
		AT1G64650
		AT1G64660
		AT1G64720
		AT1G64740
		AT1G64795
		AT1G64850
		AT1G64900
		AT1G64970
		AT1G64980
		AT1G65320
		AT1G65350
		AT1G65450
		AT1G65470
		AT1G65690
		AT1G65730
		AT1G65820
		AT1G65840
		AT1G65880
		AT1G65890
		AT1G65930
		AT1G65960
		AT1G65980
		AT1G66120
		AT1G66140
		AT1G66145
		AT1G66150
		AT1G66180
		AT1G66235
		AT1G66250
		AT1G66260
		AT1G66300
		AT1G66330
		AT1G66345
		AT1G66350
		AT1G66380
		AT1G66480
		AT1G66490
		AT1G66500
		AT1G66540
		AT1G66590
		AT1G66600
		AT1G66730
		AT1G66770
		AT1G66820
		AT1G66830
		AT1G66850
		AT1G66890
		AT1G67040
		AT1G67050
		AT1G67080
		AT1G67090
		AT1G67140
		AT1G67230
		AT1G67300
		AT1G67310
		AT1G67320
		AT1G67360
		AT1G67410
		AT1G67440
		AT1G67480
		AT1G67510
		AT1G67560
		AT1G67630
		AT1G67650
		AT1G67680
		AT1G67720
		AT1G67730
		AT1G67740
		AT1G67830
		AT1G67840
		AT1G67850
		AT1G67880
		AT1G67930
		AT1G67960
		AT1G68020
		AT1G68030
		AT1G68050
		AT1G68060
		AT1G68070
		AT1G68120
		AT1G68140
		AT1G68160
		AT1G68180
		AT1G68190
		AT1G68200
		AT1G68220
		AT1G68290
		AT1G68300
		AT1G68310
		AT1G68340
		AT1G68350
		AT1G68360
		AT1G68400
		AT1G68410
		AT1G68440
		AT1G68470
		AT1G68480
		AT1G68490
		AT1G68500
		AT1G68540
		AT1G68550
		AT1G68560
		AT1G68570
		AT1G68580
		AT1G68590
		AT1G68610
		AT1G68620
		AT1G68670
		AT1G68690
		AT1G68710
		AT1G68720
		AT1G68780
		AT1G68790
		AT1G68795
		AT1G68800
		AT1G68820
		AT1G68830
		AT1G68945
		AT1G68990
		AT1G69030
		AT1G69040
		AT1G69070
		AT1G69085
		AT1G69120
		AT1G69150
		AT1G69160
		AT1G69170
		AT1G69190
		AT1G69250
		AT1G69260
		AT1G69270
		AT1G69295
		AT1G69310
		AT1G69320
		AT1G69340
		AT1G69360
		AT1G69370
		AT1G69400
		AT1G69420
		AT1G69430
		AT1G69450
		AT1G69510
		AT1G69526
		AT1G69530
		AT1G69540
		AT1G69550
		AT1G69560
		AT1G69570
		AT1G69580
		AT1G69588
		AT1G69600
		AT1G69610
		AT1G69640
		AT1G69700
		AT1G69740
		AT1G69750
		AT1G69760
		AT1G69770
		AT1G69780
		AT1G69790
		AT1G69840
		AT1G69850
		AT1G69860
		AT1G69870
		AT1G69900
		AT1G69920
		AT1G69940
		AT1G69970
		AT1G69980
		AT1G70000
		AT1G70020
		AT1G70060
		AT1G70090
		AT1G70140
		AT1G70150
		AT1G70180
		AT1G70190
		AT1G70200
		AT1G70220
		AT1G70250
		AT1G70260
		AT1G70280
		AT1G70290
		AT1G70300
		AT1G70310
		AT1G70360
		AT1G70370
		AT1G70380
		AT1G70400
		AT1G70410
		AT1G70420
		AT1G70430
		AT1G70490
		AT1G70505
		AT1G70540
		AT1G70550
		AT1G70570
		AT1G70610
		AT1G70660
		AT1G70690
		AT1G70700
		AT1G70710
		AT1G70720
		AT1G70730
		AT1G70740
		AT1G70750
		AT1G70780
		AT1G70790
		AT1G70870
		AT1G70900
		AT1G70910
		AT1G70940
		AT1G70950
		AT1G70980
		AT1G70985
		AT1G70990
		AT1G71000
		AT1G71010
		AT1G71040
		AT1G71050
		AT1G71060
		AT1G71070
		AT1G71080
		AT1G71100
		AT1G71110
		AT1G71130
		AT1G71310
		AT1G71350
		AT1G71440
		AT1G71490
		AT1G71520
		AT1G71530
		AT1G71692
		AT1G71695
		AT1G71697
		AT1G71720
		AT1G71730
		AT1G71770
		AT1G71780
		AT1G71830
		AT1G71850
		AT1G71865
		AT1G71870
		AT1G71880
		AT1G71900
		AT1G71920
		AT1G71960
		AT1G71970
		AT1G71980
		AT1G72020
		AT1G72040
		AT1G72090
		AT1G72100
		AT1G72141
		AT1G72150
		AT1G72170
		AT1G72175
		AT1G72180
		AT1G72200
		AT1G72210
		AT1G72220
		AT1G72230
		AT1G72250
		AT1G72275
		AT1G72280
		AT1G72310
		AT1G72320
		AT1G72410
		AT1G72420
		AT1G72450
		AT1G72460
		AT1G72470
		AT1G72480
		AT1G72500
		AT1G72510
		AT1G72520
		AT1G72620
		AT1G72630
		AT1G72640
		AT1G72650
		AT1G72680
		AT1G72690
		AT1G72700
		AT1G72740
		AT1G72770
		AT1G72810
		AT1G72820
		AT1G72830
		AT1G72860
		AT1G72910
		AT1G72920
		AT1G72940
		AT1G72950
		AT1G72960
		AT1G72990
		AT1G73000
		AT1G73010
		AT1G73030
		AT1G73060
		AT1G73066
		AT1G73090
		AT1G73100
		AT1G73120
		AT1G73170
		AT1G73210
		AT1G73220
		AT1G73240
		AT1G73250
		AT1G73350
		AT1G73360
		AT1G73370
		AT1G73390
		AT1G73400
		AT1G73440
		AT1G73480
		AT1G73490
		AT1G73500
		AT1G73510
		AT1G73540
		AT1G73570
		AT1G73580
		AT1G73590
		AT1G73630
		AT1G73660
		AT1G73670
		AT1G73680
		AT1G73690
		AT1G73710
		AT1G73720
		AT1G73740
		AT1G73760
		AT1G73770
		AT1G73805
		AT1G73820
		AT1G73830
		AT1G73840
		AT1G73850
		AT1G73860
		AT1G73875
		AT1G73880
		AT1G73940
		AT1G73950
		AT1G73960
		AT1G73990
		AT1G74030
		AT1G74050
		AT1G74060
		AT1G74070
		AT1G74088
		AT1G74100
		AT1G74270
		AT1G74280
		AT1G74300
		AT1G74330
		AT1G74430
		AT1G74450
		AT1G74460
		AT1G74510
		AT1G74560
		AT1G74640
		AT1G74660
		AT1G74670
		AT1G74700
		AT1G74710
		AT1G74720
		AT1G74740
		AT1G74750
		AT1G74780
		AT1G74800
		AT1G74860
		AT1G74920
		AT1G74930
		AT1G74940
		AT1G74970
		AT1G75000
		AT1G75010
		AT1G75020
		AT1G75060
		AT1G75080
		AT1G75100
		AT1G75110
		AT1G75160
		AT1G75170
		AT1G75180
		AT1G75210
		AT1G75220
		AT1G75230
		AT1G75240
		AT1G75250
		AT1G75280
		AT1G75290
		AT1G75300
		AT1G75310
		AT1G75330
		AT1G75350
		AT1G75360
		AT1G75370
		AT1G75380
		AT1G75390
		AT1G75400
		AT1G75410
		AT1G75420
		AT1G75440
		AT1G75450
		AT1G75460
		AT1G75490
		AT1G75500
		AT1G75510
		AT1G75520
		AT1G75530
		AT1G75540
		AT1G75550
[truncated: 6,827 more rows]
