# Supplementary material for: A CRC–MYB-mediated local chromatin loop at the MAB4 locus determines auxin-mediated nectary size in Arabidopsis thaliana
Source: Research Square preprint supplement (doi:10.21203/rs.3.rs-7421252/v1), 2025-09-07
Supplement: Supplementary file 7 [file 8e6e56edf37964e60a6bbda8.xlsx]

## Sheet: Sheet1
Supplementary Data 8. Results of RNA-seq experiments for the wild type and myb57 myb21 myb24 at stage 13-14.
reference_id	AGI	Col_14_1	Col_14_2	Col_14_3	myb_14_1	myb_14_2	myb_14_3	logconc	logfc	adj_pvalue	annotation
AT1G70830.1	AT1G70830	8521	3131	6535	22573	22422	21084	10.0963	1.29491	0.00010224	MLP-like protein 28
AT3G52180.1	AT3G52180	395	326	306	1110	883	730	5.64437	0.85309	0.000102516	dual specificity protein phosphatase (DsPTP1) family protein
AT5G41740.1	AT5G41740	8	9	1	20	89	137	1.84536	3.26625	0.00010276	Disease resistance protein (TIR-NBS-LRR class) family
AT1G24735.1	AT1G24735	8	12	6	63	39	48	1.32729	1.97232	0.000103044	S-adenosyl-L-methionine-dependent methyltransferases superfamily protein
AT3G28345.1	AT3G28345	228	163	244	770	671	552	5.1278	1.06665	0.000104885	ABC transporter family protein
AT5G50160.1	AT5G50160	434	467	389	1020	1078	1077	5.9074	0.742883	0.000109148	ferric reduction oxidase 8
AT3G57510.1	AT3G57510	1	3	1	16	21	23	0.0636767	2.96829	0.000112167	Pectin lyase-like superfamily protein
AT4G01060.3	AT4G01060	20	14	17	71	70	133	2.15497	1.86737	0.000112167	CAPRICE-like MYB3
AT1G70260.1	AT1G70260	1	5	1	17	71	28	0.847498	3.46123	0.000113855	nodulin MtN21 /EamA-like transporter family protein
AT1G10410.1	AT1G10410	793	640	530	1529	1518	1622	6.47292	0.71048	0.000114554	Protein of unknown function (DUF1336)
AT1G19630.1	AT1G19630	25	33	31	181	160	86	2.79324	1.68646	0.00011771	cytochrome P450, family 722, subfamily A, polypeptide 1
AT1G72920.1	AT1G72920	39	27	16	74	148	303	2.99897	2.16892	0.000117834	Toll-Interleukin-Resistance (TIR) domain family protein
AT3G09910.1	AT3G09910	56	76	80	196	283	363	3.81161	1.40803	0.000120024	RAB GTPase homolog C2B
AT1G80110.1	AT1G80110	26	32	23	90	110	127	2.47899	1.46221	0.000121251	phloem protein 2-B11
AT5G53890.1	AT5G53890	308	258	203	728	661	553	5.18091	0.796278	0.000121725	phytosylfokine-alpha receptor 2
AT2G20340.1	AT2G20340	162	133	120	488	335	359	4.4159	0.960161	0.000122849	Pyridoxal phosphate (PLP)-dependent transferases superfamily protein
AT2G18160.1	AT2G18160	1843	1735	1275	1393	1550	1397	7.06737	-0.700249	0.000126679	basic leucine-zipper 2
AT2G18162.1	AT2G18162	1843	1735	1275	1393	1550	1397	7.06737	-0.700249	0.000126679	conserved peptide upstream open reading frame 1
AT4G01950.1	AT4G01950	9	3	7	29	48	60	1.16772	2.28396	0.000126679	glycerol-3-phosphate acyltransferase 3
AT4G05100.1	AT4G05100	2	4	1	29	14	56	0.659703	3.23469	0.000127729	myb domain protein 74
AT2G07811.1	AT2G07811	132	173	88	82	72	84	3.24608	-1.25425	0.000127835	pseudogene
AT1G72910.1	AT1G72910	135	109	48	248	343	723	4.37813	1.676	0.000128679	Toll-Interleukin-Resistance (TIR) domain-containing protein
AT3G22235.2	AT3G22235	112	54	27	269	188	596	4.00278	1.9708	0.000129786	unknown protein
AT4G39480.1	AT4G39480	1713	1008	1226	1190	1011	896	6.70679	-0.90277	0.000130776	cytochrome P450, family 96, subfamily A, polypeptide 9
AT5G18290.1	AT5G18290	91	91	58	212	275	246	3.70584	1.07583	0.00013276	Aquaporin-like superfamily protein
AT1G07050.1	AT1G07050	172	165	92	316	539	456	4.52671	1.09084	0.000132876	CCT motif family protein
AT2G28900.1	AT2G28900	1682	1232	938	3911	3047	2829	7.49646	0.816642	0.000133276	outer plastid envelope protein 16-1
AT5G40170.1	AT5G40170	440	414	344	321	335	371	5.03361	-0.770309	0.000133738	receptor like protein 54
AT2G46400.1	AT2G46400	35	32	13	69	172	204	2.80372	1.96898	0.000136042	WRKY DNA-binding protein 46
AT5G23810.2	AT5G23810	164	163	158	416	564	409	4.65083	0.955681	0.000137057	amino acid permease 7
AT1G70090.1	AT1G70090	378	393	230	704	910	1137	5.63669	0.93223	0.000137296	glucosyl transferase family 8
AT3G46600.1	AT3G46600	222	222	136	392	642	997	5.09655	1.28291	0.000137867	GRAS family transcription factor
AT1G69520.1	AT1G69520	18	15	10	70	65	56	1.71416	1.60756	0.000138898	S-adenosyl-L-methionine-dependent methyltransferases superfamily protein
AT3G63470.1	AT3G63470	200	196	153	154	105	134	3.81386	-1.02941	0.000139176	serine carboxypeptidase-like 40
AT4G01430.1	AT4G01430	25	39	27	139	109	114	2.62347	1.43198	0.000140421	nodulin MtN21 /EamA-like transporter family protein
AT5G54940.2	AT5G54940	995	1059	696	1854	2495	3101	7.07859	0.902901	0.000145528	Translation initiation factor SUI1 family protein
AT3G22231.1	AT3G22231	139	80	8	474	341	1051	4.70863	2.60954	0.000147065	pathogen and circadian controlled 1
AT4G22570.1	AT4G22570	2240	1579	1329	3910	4440	4171	7.8783	0.751117	0.000147545	adenine phosphoribosyl transferase 3
AT3G56275.1	AT3G56275	64	62	67	319	162	247	3.61779	1.34282	0.000147553	pseudogene
AT1G69880.1	AT1G69880	5	7	4	34	70	27	1.08569	2.46916	0.000148336	thioredoxin H-type 8
AT1G75040.1	AT1G75040	61	26	41	223	120	231	3.22109	1.61328	0.000148765	pathogenesis-related gene 5
AT2G14210.1	AT2G14210	154	152	162	92	69	18	3.34611	-1.96415	0.00014882	AGAMOUS-like 44
AT2G23130.1	AT2G23130	35	20	24	123	80	198	2.68846	1.79525	0.000149024	arabinogalactan protein 17
AT3G19350.1	AT3G19350	0	0	0	11	8	8	-0.901878	5.94611	0.00014952	maternally expressed pab C-terminal
AT3G28790.1	AT3G28790	396	1411	167	83	110	257	5.24262	-2.61705	0.00014952	Protein of unknown function (DUF1216)
AT5G67480.1	AT5G67480	541	599	281	1122	1222	1498	6.11894	0.919687	0.000150471	BTB and TAZ domain protein 4
AT4G11320.1	AT4G11320	1973	642	1149	3906	5166	4469	7.80922	1.30875	0.000152549	Papain family cysteine protease
AT5G24240.1	AT5G24240	64	191	47	21	26	43	2.61009	-2.25703	0.000154425	Phosphatidylinositol 3- and 4-kinase ;Ubiquitin family protein
AT2G32510.1	AT2G32510	77	60	59	40	28	38	2.21127	-1.43368	0.000154597	mitogen-activated protein kinase kinase kinase 17
AT1G69260.1	AT1G69260	19	27	38	135	109	180	2.77681	1.7334	0.000156331	ABI five binding protein
AT3G13660.1	AT3G13660	68	65	43	25	18	39	1.99112	-1.63004	0.000157723	Disease resistance-responsive (dirigent-like protein) family protein
AT3G21190.1	AT3G21190	560	508	419	1455	1155	1061	6.10853	0.755036	0.000163349	O-fucosyltransferase family protein
AT3G17860.1	AT3G17860	256	250	261	792	674	602	5.2491	0.860227	0.000168561	jasmonate-zim-domain protein 3
AT5G54170.1	AT5G54170	306	352	239	764	667	819	5.39852	0.781621	0.000170092	Polyketide cyclase/dehydrase and lipid transport superfamily protein
AT3G46600.2	AT3G46600	210	211	133	371	611	966	5.03604	1.28664	0.000172855	GRAS family transcription factor
AT3G22970.2	AT3G22970	1241	912	1095	1002	919	698	6.44916	-0.878418	0.00017493	Protein of unknown function (DUF506)
AT5G40260.1	AT5G40260	47	36	37	228	212	95	3.12456	1.59892	0.00017493	Nodulin MtN3 family protein
AT1G13280.1	AT1G13280	1272	1004	991	3073	2565	2434	7.24419	0.750193	0.000175712	allene oxide cyclase 4
AT2G47560.1	AT2G47560	60	65	44	23	25	37	1.96794	-1.52708	0.000175815	RING/U-box superfamily protein
AT2G15620.1	AT2G15620	302	225	155	563	645	543	5.01962	0.83709	0.000182873	nitrite reductase 1
AT5G13800.1	AT5G13800	297	230	228	557	722	678	5.18539	0.824414	0.000184222	pheophytinase
AT5G49760.1	AT5G49760	1025	695	680	724	700	638	6.03124	-0.76143	0.000184391	Leucine-rich repeat protein kinase family protein
AT1G78960.1	AT1G78960	742	632	613	643	516	585	5.77942	-0.745183	0.000185013	lupeol synthase 2
AT3G22235.1	AT3G22235	138	67	40	295	227	704	4.24384	1.83842	0.000187966	unknown protein
AT1G35140.1	AT1G35140	7	19	3	23	124	362	2.80491	3.62249	0.000188795	Phosphate-responsive 1 family protein
AT5G44390.1	AT5G44390	20	11	15	64	80	66	1.83769	1.63621	0.000188795	FAD-binding Berberine family protein
AT3G15790.1	AT3G15790	807	689	655	1625	1694	1935	6.63462	0.734596	0.000191136	methyl-CPG-binding domain 11
AT3G46600.3	AT3G46600	216	213	126	370	618	969	5.03996	1.29628	0.000191222	GRAS family transcription factor
AT5G18290.2	AT5G18290	87	89	56	204	265	238	3.656	1.07234	0.000191232	Aquaporin-like superfamily protein
AT1G72180.1	AT1G72180	516	402	474	1295	1176	1134	6.06602	0.80491	0.000192135	Leucine-rich receptor-like protein kinase family protein
AT1G17960.1	AT1G17960	176	212	123	92	131	50	3.57248	-1.43932	0.000193826	Threonyl-tRNA synthetase
AT5G13800.2	AT5G13800	293	225	224	547	708	671	5.16178	0.826637	0.000195497	pheophytinase
AT1G66140.1	AT1G66140	43	59	53	10	26	26	1.77408	-1.884	0.000197493	zinc finger protein 4
AT3G07010.1	AT3G07010	1181	993	1122	982	1004	700	6.47831	-0.866314	0.000197493	Pectin lyase-like superfamily protein
AT3G22420.2	AT3G22420	2624	2375	2193	2303	2229	1902	7.64515	-0.718132	0.000197493	with no lysine (K) kinase 2
AT4G31800.1	AT4G31800	285	350	86	562	1124	1905	5.77581	1.83788	0.000197493	WRKY DNA-binding protein 18
AT1G21830.1	AT1G21830	603	576	490	410	570	411	5.49837	-0.813897	0.000200499	unknown protein
AT5G25460.1	AT5G25460	6353	6053	5098	6137	4598	4712	8.91737	-0.734373	0.000200499	Protein of unknown function, DUF642
AT3G57450.1	AT3G57450	148	186	64	283	573	918	4.80938	1.65686	0.000203605	unknown protein
AT4G18020.6	AT4G18020	1670	1623	1361	1379	1499	1363	7.02548	-0.686265	0.000204761	CheY-like two-component responsive regulator family protein
AT3G06035.1	AT3G06035	335	221	232	914	733	559	5.31389	0.936302	0.000205729	Glycoprotein membrane precursor GPI-anchored
AT4G18020.2	AT4G18020	1670	1625	1362	1373	1504	1364	7.02609	-0.687186	0.000207051	CheY-like two-component responsive regulator family protein
AT4G18020.1	AT4G18020	1660	1621	1356	1368	1492	1365	7.0202	-0.686475	0.000207544	CheY-like two-component responsive regulator family protein
AT1G70680.1	AT1G70680	60	39	24	10	23	12	1.39353	-1.94955	0.00020804	Caleosin-related family protein
AT1G72416.2	AT1G72416	36	28	10	80	121	144	2.49886	1.71794	0.000209734	Chaperone DnaJ-domain superfamily protein
AT3G10525.1	AT3G10525	252	279	221	141	211	206	4.29118	-0.982029	0.000210705	LOSS OF GIANT CELLS FROM ORGANS
AT5G14070.1	AT5G14070	21	21	4	3	1	3	-0.102957	-3.12852	0.00021212	Thioredoxin superfamily protein
AT4G31800.2	AT4G31800	278	337	85	535	1083	1851	5.72811	1.83004	0.000212766	WRKY DNA-binding protein 18
AT3G52180.2	AT3G52180	392	330	309	1075	852	727	5.62305	0.809598	0.000213463	dual specificity protein phosphatase (DsPTP1) family protein
AT3G09070.1	AT3G09070	975	807	670	822	706	655	6.08095	-0.710404	0.000214867	Protein of unknown function (DUF740)
AT2G20142.1	AT2G20142	0	1	0	6	17	30	-0.158264	4.82136	0.000215606	Toll-Interleukin-Resistance (TIR) domain family protein
AT5G26320.1	AT5G26320	4	7	9	0	1	0	-1.08618	-4.39426	0.000217508	TRAF-like family protein
AT1G08000.2	AT1G08000	389	400	314	321	320	317	4.92179	-0.752719	0.000217662	GATA transcription factor 10
AT1G49640.1	AT1G49640	6	4	1	32	70	18	0.929415	2.90302	0.000217662	alpha/beta-Hydrolases superfamily protein
AT1G65060.1	AT1G65060	232	143	186	865	513	456	4.98199	1.14464	0.000221202	4-coumarate:CoA ligase 3
AT3G25760.1	AT3G25760	4	3	8	44	25	48	0.951184	2.36188	0.000223246	allene oxide cyclase 1
AT3G24100.1	AT3G24100	381	459	244	209	266	320	4.79658	-0.97426	0.00022623	Uncharacterised protein family SERF
AT4G39950.1	AT4G39950	89	52	83	225	238	501	3.97074	1.53619	0.00022623	cytochrome P450, family 79, subfamily B, polypeptide 2
AT3G17860.2	AT3G17860	222	232	236	683	618	548	5.09285	0.850593	0.000227022	jasmonate-zim-domain protein 3
AT1G53580.1	AT1G53580	320	288	261	677	678	806	5.34897	0.762002	0.000230566	glyoxalase II 3
AT1G63010.5	AT1G63010	445	331	318	946	871	834	5.65195	0.729708	0.000230925	Major Facilitator Superfamily with SPX (SYG1/Pho81/XPR1) domain-containing protein
AT3G22970.1	AT3G22970	1295	950	1149	1052	969	732	6.51602	-0.870479	0.000234031	Protein of unknown function (DUF506)
AT3G22968.1	AT3G22968	1295	950	1149	1052	969	732	6.51602	-0.87048	0.000234336	conserved peptide upstream open reading frame 59
AT4G08869.1	AT4G08869	6	3	3	14	61	59	1.07268	2.92259	0.000234526	Putative membrane lipoprotein
AT1G01490.2	AT1G01490	1127	1451	810	760	990	988	6.49306	-0.841201	0.000236963	Heavy metal transport/detoxification superfamily protein
AT5G41740.2	AT5G41740	8	9	1	18	83	128	1.75806	3.1639	0.000238906	Disease resistance protein (TIR-NBS-LRR class) family
AT4G18020.3	AT4G18020	1648	1608	1339	1364	1480	1359	7.00895	-0.680458	0.000239978	CheY-like two-component responsive regulator family protein
AT2G18280.1	AT2G18280	2112	2043	2067	1294	1970	1770	7.39223	-0.872522	0.000241364	tubby like protein 2
AT3G47960.1	AT3G47960	2413	2288	1565	1673	1624	2110	7.4133	-0.745686	0.000242896	Major facilitator superfamily protein
AT5G67150.1	AT5G67150	280	245	205	591	570	601	5.0689	0.725793	0.000242896	HXXXD-type acyl-transferase family protein
AT1G63010.4	AT1G63010	453	340	323	965	883	847	5.67725	0.725008	0.000243014	Major Facilitator Superfamily with SPX (SYG1/Pho81/XPR1) domain-containing protein
AT5G23810.1	AT5G23810	340	358	287	730	1035	778	5.56294	0.816847	0.000243033	amino acid permease 7
AT5G60142.1	AT5G60142	45	45	36	147	141	133	2.89481	1.1904	0.000244831	AP2/B3-like transcriptional factor family protein
AT5G54550.1	AT5G54550	8	9	9	0	1	2	-0.770626	-3.48993	0.000247965	Protein of unknown function (DUF295)
AT1G61100.2	AT1G61100	434	450	370	955	950	1182	5.86607	0.746658	0.000249859	disease resistance protein (TIR class), putative
AT1G31173.1	AT1G31173	0	0	0	3	13	21	-0.578341	6.40238	0.000255193	MIR167D; miRNA
AT3G61190.2	AT3G61190	12	6	2	21	71	114	1.64339	2.86087	0.00025811	BON association protein 1
AT4G16670.1	AT4G16670	642	629	575	484	550	587	5.67668	-0.745912	0.000259241	Plant protein of unknown function (DUF828) with plant pleckstrin homology-like region
AT3G13520.1	AT3G13520	859	1036	799	2205	2034	2395	6.96653	0.742298	0.000259512	arabinogalactan protein 12
AT3G55980.1	AT3G55980	241	419	113	442	1845	2801	6.20255	2.22387	0.000259825	salt-inducible zinc finger 1
AT1G53580.2	AT1G53580	308	276	248	644	646	772	5.28323	0.7581	0.000259865	glyoxalase II 3
AT3G17860.3	AT3G17860	223	232	237	684	618	547	5.09432	0.846279	0.000259865	jasmonate-zim-domain protein 3
AT2G14750.1	AT2G14750	266	331	239	608	747	1108	5.45394	1.00799	0.000260777	APS kinase
AT1G61100.1	AT1G61100	440	453	378	966	962	1192	5.88313	0.741794	0.000262054	disease resistance protein (TIR class), putative
AT1G65060.2	AT1G65060	223	139	176	816	482	436	4.90772	1.12586	0.000262054	4-coumarate:CoA ligase 3
AT1G49130.1	AT1G49130	134	83	107	43	36	80	2.89569	-1.58092	0.000262943	B-box type zinc finger protein with CCT domain
AT1G63010.1	AT1G63010	450	343	322	954	878	845	5.67078	0.71668	0.000262943	Major Facilitator Superfamily with SPX (SYG1/Pho81/XPR1) domain-containing protein
AT5G10946.1	AT5G10946	9	8	12	33	79	80	1.632	2.14754	0.000262943	unknown protein
AT5G59500.1	AT5G59500	681	484	515	557	425	419	5.50699	-0.816057	0.000262943	protein C-terminal S-isoprenylcysteine carboxyl O-methyltransferases
AT4G01440.1	AT4G01440	250	198	209	674	498	558	5.00134	0.837845	0.000267079	nodulin MtN21 /EamA-like transporter family protein
AT1G55260.2	AT1G55260	676	444	611	1943	1633	1334	6.46411	0.931408	0.000267397	Bifunctional inhibitor/lipid-transfer protein/seed storage 2S albumin superfamily protein
AT3G52060.2	AT3G52060	712	643	546	560	626	530	5.72685	-0.696048	0.00026848	Core-2/I-branching beta-1,6-N-acetylglucosaminyltransferase family protein
AT2G18280.2	AT2G18280	2077	2016	2025	1262	1946	1746	7.36807	-0.870783	0.000268868	tubby like protein 2
AT3G43720.1	AT3G43720	678	623	578	1714	1397	1437	6.4315	0.716763	0.000271552	Bifunctional inhibitor/lipid-transfer protein/seed storage 2S albumin superfamily protein
AT1G63010.3	AT1G63010	453	341	323	957	883	844	5.67406	0.717914	0.000272522	Major Facilitator Superfamily with SPX (SYG1/Pho81/XPR1) domain-containing protein
AT2G33170.1	AT2G33170	945	947	757	784	873	748	6.20928	-0.689253	0.000274817	Leucine-rich repeat receptor-like protein kinase family protein
AT3G52060.1	AT3G52060	765	697	602	608	681	578	5.84783	-0.695015	0.000276701	Core-2/I-branching beta-1,6-N-acetylglucosaminyltransferase family protein
AT1G04310.1	AT1G04310	493	526	409	353	482	365	5.27738	-0.800989	0.000278473	ethylene response sensor 2
AT1G77520.1	AT1G77520	209	101	172	688	556	399	4.81019	1.20027	0.000280466	O-methyltransferase family protein
AT4G16350.1	AT4G16350	9	16	13	1	1	5	-0.283349	-2.92887	0.000282193	calcineurin B-like protein 6
AT3G11580.1	AT3G11580	72	80	51	185	198	272	3.52601	1.15096	0.000286787	AP2/B3-like transcriptional factor family protein
AT5G47960.1	AT5G47960	13	11	4	34	62	63	1.40695	1.97828	0.000288106	RAB GTPase homolog A4C
AT3G46650.1	AT3G46650	4	7	2	23	32	33	0.609281	2.19854	0.000288478	UDP-Glycosyltransferase superfamily protein
AT4G16160.2	AT4G16160	0	0	0	6	6	21	-0.69881	6.23684	0.000288478	Mitochondrial import inner membrane translocase subunit Tim17/Tim22/Tim23 family protein
AT5G58400.1	AT5G58400	106	37	86	309	304	276	3.88938	1.38862	0.000291716	Peroxidase superfamily protein
AT1G12090.1	AT1G12090	1278	952	707	2198	2531	2282	7.05072	0.730065	0.000293531	extensin-like protein
AT3G50120.1	AT3G50120	1	2	2	15	22	19	-0.00969084	2.86198	0.000294535	Plant protein of unknown function (DUF247)
AT1G63010.2	AT1G63010	427	318	311	907	832	811	5.59872	0.723282	0.000297068	Major Facilitator Superfamily with SPX (SYG1/Pho81/XPR1) domain-containing protein
AT1G02850.2	AT1G02850	254	124	188	646	605	475	4.92731	1.05099	0.000298299	beta glucosidase 11
AT2G40130.1	AT2G40130	123	168	105	97	89	63	3.28268	-1.21698	0.000299686	Double Clp-N motif-containing P-loop nucleoside triphosphate hydrolases superfamily protein
AT5G57660.1	AT5G57660	447	456	831	234	383	388	5.43492	-1.41322	0.000300393	CONSTANS-like 5
AT1G28290.2	AT1G28290	5415	4694	3651	4277	4387	2831	8.53283	-0.799855	0.000301961	arabinogalactan protein 31
AT1G55260.1	AT1G55260	772	526	705	2238	1877	1515	6.66539	0.917819	0.000302853	Bifunctional inhibitor/lipid-transfer protein/seed storage 2S albumin superfamily protein
AT5G66080.1	AT5G66080	107	106	75	235	283	298	3.89283	0.962518	0.000304191	Protein phosphatase 2C family protein
ATCG00170.1	ATCG00170	276	836	243	143	146	288	4.89271	-1.7549	0.000304191	DNA-directed RNA polymerase family protein
AT5G22430.1	AT5G22430	174	159	160	930	621	306	4.94136	1.34343	0.000306258	Pollen Ole e 1 allergen and extensin family protein
AT2G40130.2	AT2G40130	123	167	103	95	89	62	3.269	-1.22219	0.000306364	Double Clp-N motif-containing P-loop nucleoside triphosphate hydrolases superfamily protein
AT1G49130.2	AT1G49130	139	83	111	43	37	83	2.93456	-1.58521	0.000307887	B-box type zinc finger protein with CCT domain
AT2G26740.1	AT2G26740	1005	1010	812	738	905	890	6.29664	-0.707768	0.000307887	soluble epoxide hydrolase
AT5G66816.1	AT5G66816	3	6	2	23	37	24	0.530853	2.36276	0.000307887	unknown protein
ATMG01370.1	ATMG01370	60	101	34	24	26	33	2.0961	-1.74484	0.000310015	unknown protein
AT5G05960.1	AT5G05960	46	46	34	139	134	140	2.87472	1.16707	0.000313917	Bifunctional inhibitor/lipid-transfer protein/seed storage 2S albumin superfamily protein
AT1G10070.1	AT1G10070	52	93	64	208	259	248	3.6322	1.21096	0.000314031	branched-chain amino acid transaminase 2
AT3G61190.1	AT3G61190	13	6	2	22	71	116	1.66703	2.81571	0.000314328	BON association protein 1
AT3G22420.1	AT3G22420	2670	2378	2248	2360	2288	1943	7.67187	-0.705139	0.000320898	with no lysine (K) kinase 2
AT4G37390.1	AT4G37390	58	35	32	12	20	23	1.48837	-1.70572	0.000322583	Auxin-responsive GH3 family protein
AT3G43720.2	AT3G43720	587	546	520	1547	1234	1262	6.25769	0.728801	0.000326628	Bifunctional inhibitor/lipid-transfer protein/seed storage 2S albumin superfamily protein
AT2G42660.1	AT2G42660	4	2	0	12	36	24	0.281185	3.01191	0.000329014	Homeodomain-like superfamily protein
AT5G21105.3	AT5G21105	588	527	357	1598	1200	979	6.1227	0.825619	0.000332043	Plant L-ascorbate oxidase
AT5G59580.1	AT5G59580	15	4	11	49	50	86	1.5938	2.06328	0.000332976	UDP-glucosyl transferase 76E1
AT4G11760.1	AT4G11760	13	42	9	3	2	6	0.337789	-3.00943	0.000337843	low-molecular-weight cysteine-rich 17
AT1G01490.1	AT1G01490	1153	1496	842	817	1032	1032	6.54781	-0.812187	0.00034995	Heavy metal transport/detoxification superfamily protein
AT5G44730.2	AT5G44730	522	435	355	447	350	332	5.16016	-0.759023	0.00035264	Haloacid dehalogenase-like hydrolase (HAD) superfamily protein
AT4G39490.1	AT4G39490	62	39	42	25	27	21	1.73936	-1.50889	0.00035913	cytochrome P450, family 96, subfamily A, polypeptide 10
AT2G21590.2	AT2G21590	375	240	248	1059	716	634	5.43969	0.934626	0.000361017	Glucose-1-phosphate adenylyltransferase family protein
AT2G26440.1	AT2G26440	452	314	347	1051	882	860	5.7107	0.772409	0.000365039	Plant invertase/pectin methylesterase inhibitor superfamily
AT2G27430.1	AT2G27430	54	34	24	12	20	15	1.31384	-1.76149	0.000370719	ARM repeat superfamily protein
AT3G63050.1	AT3G63050	11	13	4	36	56	57	1.3367	1.87859	0.000370719	unknown protein
AT5G52570.2	AT5G52570	6	1	3	24	21	41	0.542261	2.53143	0.000381123	beta-carotene hydroxylase 2
AT5G66040.2	AT5G66040	323	322	261	690	880	677	5.40512	0.760649	0.000384173	sulfurtransferase protein 16
AT1G79110.2	AT1G79110	271	290	193	243	178	164	4.30665	-0.907735	0.000392837	zinc ion binding
AT4G30950.1	AT4G30950	3785	2744	2933	3077	2814	2415	8.02924	-0.744094	0.000392837	fatty acid desaturase 6
AT4G27652.1	AT4G27652	26	14	15	48	121	144	2.31999	1.97255	0.000394735	unknown protein
AT4G23010.1	AT4G23010	174	154	146	429	398	389	4.51114	0.80413	0.000399276	UDP-galactose transporter 2
AT3G23250.2	AT3G23250	2	1	0	8	18	33	0.00437142	3.65054	0.000401952	myb domain protein 15
AT1G02850.5	AT1G02850	263	127	195	658	622	489	4.96643	1.03856	0.000402008	beta glucosidase 11
AT1G72120.1	AT1G72120	64	37	51	146	214	185	3.23117	1.28637	0.000407522	Major facilitator superfamily protein
AT1G02850.1	AT1G02850	253	123	188	649	598	466	4.91838	1.0446	0.000410006	beta glucosidase 11
AT5G47910.1	AT5G47910	636	709	467	1246	1541	1604	6.37597	0.737677	0.000414008	respiratory burst oxidase homologue D
AT1G21910.1	AT1G21910	4	6	3	18	38	60	0.917243	2.59382	0.000419987	Integrase-type DNA-binding superfamily protein
AT1G68800.1	AT1G68800	42	39	25	20	18	10	1.27096	-1.66833	0.000419987	TCP domain protein 12
AT3G06433.1	AT3G06433	188	182	130	146	100	118	3.68341	-0.998447	0.000426017	pseudogene
AT2G21590.1	AT2G21590	380	238	251	1075	722	637	5.45286	0.93923	0.000429842	Glucose-1-phosphate adenylyltransferase family protein
AT4G12890.1	AT4G12890	451	310	375	1000	1058	861	5.76499	0.800376	0.00044412	Gamma interferon responsive lysosomal thiol (GILT) reductase family protein
AT5G60030.1	AT5G60030	393	777	273	234	252	373	5.10924	-1.26958	0.00044412	unknown protein
AT1G75390.2	AT1G75390	2269	2826	1936	2045	2224	2009	7.60789	-0.713399	0.000444162	basic leucine-zipper 44
AT2G01913.1	AT2G01913	300	337	287	269	278	196	4.63206	-0.876273	0.000450278	unknown protein
AT1G08650.2	AT1G08650	325	266	264	192	239	258	4.51854	-0.864191	0.000451928	phosphoenolpyruvate carboxylase kinase 1
AT3G14172.1	AT3G14172	1066	974	794	935	886	817	6.3178	-0.650142	0.000455177	unknown protein
AT1G29490.1	AT1G29490	65	69	64	36	39	42	2.27112	-1.31653	0.000455501	SAUR-like auxin-responsive protein family
AT3G54810.2	AT3G54810	334	379	244	607	948	1207	5.62372	0.992743	0.000456531	Plant-specific GATA-type zinc finger transcription factor family protein
AT5G11360.1	AT5G11360	54	70	30	155	160	240	3.24633	1.32511	0.000457941	Interleukin-1 receptor-associated kinase 4 protein
AT2G45450.1	AT2G45450	35	21	22	99	97	93	2.33515	1.3452	0.000459216	protein binding
AT4G27590.1	AT4G27590	37	35	44	19	20	16	1.43126	-1.64458	0.000459216	Heavy metal transport/detoxification superfamily protein
AT1G79110.1	AT1G79110	263	282	181	233	170	153	4.24392	-0.924125	0.000462478	zinc ion binding
AT3G23250.1	AT3G23250	2	1	0	8	18	34	0.0231581	3.67524	0.000463746	myb domain protein 15
AT2G21170.2	AT2G21170	5022	4395	3645	4476	4016	3534	8.51443	-0.66555	0.000469933	triosephosphate isomerase
AT3G14200.1	AT3G14200	111	136	106	267	366	388	4.20718	0.977053	0.000469933	Chaperone DnaJ-domain superfamily protein
AT2G39650.1	AT2G39650	31	35	13	58	164	256	2.88297	2.08947	0.000473458	Protein of unknown function (DUF506)
AT1G02850.4	AT1G02850	239	115	182	603	570	454	4.84605	1.04184	0.000473976	beta glucosidase 11
AT1G56100.1	AT1G56100	11	2	6	19	70	146	1.79893	3.07888	0.000483267	Plant invertase/pectin methylesterase inhibitor superfamily protein
AT5G19720.1	AT5G19720	0	2	1	20	21	8	-0.198955	3.34998	0.000483374	Ribosomal protein L25/Gln-tRNA synthetase, anti-codon-binding domain
AT4G24140.1	AT4G24140	10	6	21	125	95	50	2.06886	2.23643	0.000483771	alpha/beta-Hydrolases superfamily protein
AT4G25845.1	AT4G25845	14	10	5	1	2	2	-0.611399	-2.94925	0.000497837	unknown protein
AT3G09910.3	AT3G09910	50	74	76	176	261	339	3.70579	1.37201	0.000499709	RAB GTPase homolog C2B
AT5G44730.1	AT5G44730	518	418	350	442	336	336	5.13498	-0.749475	0.000501076	Haloacid dehalogenase-like hydrolase (HAD) superfamily protein
AT4G04810.1	AT4G04810	4	4	0	36	21	17	0.342037	2.64107	0.000503029	methionine sulfoxide reductase B4
AT1G01340.1	AT1G01340	41	31	19	13	5	16	0.990759	-1.92775	0.000511906	cyclic nucleotide gated channel 10
AT1G54030.1	AT1G54030	606	445	518	1326	1306	1248	6.19434	0.743761	0.000512066	GDSL-like Lipase/Acylhydrolase superfamily protein
AT1G02850.3	AT1G02850	252	122	187	636	591	462	4.90227	1.03208	0.00051254	beta glucosidase 11
AT5G65410.1	AT5G65410	59	52	32	30	22	24	1.74848	-1.43588	0.000518634	homeobox protein 25
AT4G39030.1	AT4G39030	66	78	41	158	203	245	3.40861	1.18131	0.000519924	MATE efflux family protein
AT3G51860.1	AT3G51860	64	50	28	92	272	305	3.41758	1.72716	0.000522107	cation exchanger 3
AT1G20440.1	AT1G20440	1340	2040	955	839	768	1369	6.76518	-1.07151	0.000522838	cold-regulated 47
AT3G48240.1	AT3G48240	95	88	172	75	53	41	3.05171	-1.69713	0.000523386	Octicosapeptide/Phox/Bem1p family protein
AT1G50630.1	AT1G50630	97	82	82	272	216	267	3.77717	0.976283	0.000525432	Protein of unknown function (DUF3537)
AT5G17590.1	AT5G17590	9	14	8	2	3	1	-0.513429	-2.82629	0.00052591	Putative membrane lipoprotein
AT4G23010.2	AT4G23010	156	144	137	396	372	360	4.40199	0.810758	0.000529084	UDP-galactose transporter 2
AT1G10070.2	AT1G10070	50	93	63	203	253	242	3.60232	1.19654	0.000530209	branched-chain amino acid transaminase 2
AT1G72510.1	AT1G72510	165	167	158	368	435	597	4.66394	0.954145	0.000530209	Protein of unknown function (DUF1677)
AT1G75388.1	AT1G75388	2681	3365	2299	2380	2657	2441	7.85723	-0.708205	0.000531166	conserved peptide upstream open reading frame 5
AT1G75390.1	AT1G75390	2681	3365	2299	2380	2657	2441	7.85723	-0.708205	0.000531166	basic leucine-zipper 44
AT5G45340.1	AT5G45340	71	48	32	75	352	526	3.83478	2.15083	0.000535038	cytochrome P450, family 707, subfamily A, polypeptide 3
AT2G23130.2	AT2G23130	21	14	17	88	51	141	2.18259	1.87028	0.000535262	arabinogalactan protein 17
AT5G28650.1	AT5G28650	97	82	81	57	63	41	2.67689	-1.24499	0.000535326	WRKY DNA-binding protein 74
AT2G21650.1	AT2G21650	321	220	187	227	170	128	4.21405	-1.00579	0.000543869	Homeodomain-like superfamily protein
AT2G19860.2	AT2G19860	639	583	521	566	556	459	5.60706	-0.694815	0.000544187	hexokinase 2
AT1G10070.3	AT1G10070	51	91	62	195	250	243	3.58372	1.19129	0.000544693	branched-chain amino acid transaminase 2
AT5G03360.2	AT5G03360	47	27	21	117	154	95	2.6424	1.42064	0.000551019	DC1 domain-containing protein
AT1G29510.1	AT1G29510	499	489	461	438	372	463	5.32884	-0.748835	0.000551676	SAUR-like auxin-responsive protein family
AT4G02280.1	AT4G02280	15	26	45	191	105	190	2.93653	1.86437	0.000551676	sucrose synthase 3
AT5G43580.1	AT5G43580	7	9	9	2	0	1	-0.807133	-3.43952	0.000552119	Serine protease inhibitor, potato inhibitor I-type family protein
AT1G10020.1	AT1G10020	211	191	132	438	413	463	4.63535	0.764208	0.000552449	Protein of unknown function (DUF1005)
AT5G59310.1	AT5G59310	4876	3501	4419	18818	10478	9837	9.41533	1.03742	0.000558633	lipid transfer protein 4
AT5G47220.1	AT5G47220	91	43	29	98	397	389	3.76427	1.95056	0.000566054	ethylene responsive element binding factor 2
AT5G55920.1	AT5G55920	1261	1668	691	964	827	983	6.54792	-0.900304	0.000589419	S-adenosyl-L-methionine-dependent methyltransferases superfamily protein
AT5G67180.1	AT5G67180	164	148	126	335	378	415	4.40082	0.817722	0.000591193	target of early activation tagged (EAT) 3
AT3G60420.1	AT3G60420	7	9	6	28	43	96	1.41789	2.36692	0.000592351	Phosphoglycerate mutase family protein
AT2G03505.1	AT2G03505	42	43	21	145	131	100	2.70827	1.29741	0.000594536	Carbohydrate-binding X8 domain superfamily protein
AT5G60890.1	AT5G60890	13	8	16	51	62	69	1.62981	1.72153	0.000594536	myb domain protein 34
AT3G28180.1	AT3G28180	267	256	279	566	762	1017	5.39373	0.97789	0.00060305	Cellulose-synthase-like C4
AT4G23010.3	AT4G23010	156	141	129	382	354	349	4.35188	0.79531	0.000607201	UDP-galactose transporter 2
AT2G44830.1	AT2G44830	457	327	300	963	900	750	5.63136	0.72758	0.000607945	Protein kinase superfamily protein
AT1G45201.1	AT1G45201	209	188	213	623	561	458	4.92066	0.856422	0.000611732	triacylglycerol lipase-like 1
AT4G09750.1	AT4G09750	162	147	122	367	374	342	4.3538	0.782343	0.000611732	NAD(P)-binding Rossmann-fold superfamily protein
AT1G28290.1	AT1G28290	5807	4956	3879	4675	4743	3055	8.63247	-0.771288	0.000631362	arabinogalactan protein 31
AT1G25400.1	AT1G25400	19	13	5	31	90	164	2.12457	2.44563	0.000634712	unknown protein
AT5G37980.1	AT5G37980	14	16	6	84	73	35	1.66957	1.87989	0.000636078	Zinc-binding dehydrogenase family protein
AT2G23010.1	AT2G23010	23	18	18	105	65	72	2.05969	1.48005	0.000636686	serine carboxypeptidase-like 9
AT5G57120.1	AT5G57120	1629	2440	1007	1130	1147	1473	7.02147	-0.957016	0.000638664	unknown protein
AT1G25400.2	AT1G25400	19	13	5	31	90	160	2.10809	2.42496	0.000638865	unknown protein
AT1G54200.1	AT1G54200	357	341	337	308	297	298	4.84139	-0.760423	0.000638865	unknown protein
AT5G11110.1	AT5G11110	572	640	836	561	441	563	5.77984	-0.990475	0.000638865	sucrose phosphate synthase 2F
AT2G18890.2	AT2G18890	150	157	116	97	97	115	3.44965	-0.997364	0.000642542	Protein kinase superfamily protein
AT3G12580.1	AT3G12580	81	1256	34	46	30	60	4.58676	-3.81199	0.000642542	heat shock protein 70
AT1G51680.2	AT1G51680	722	515	846	606	403	525	5.78102	-1.03757	0.00064708	4-coumarate:CoA ligase 1
AT3G46160.1	AT3G46160	7	8	6	1	1	0	-1.0066	-3.67097	0.00064708	Protein kinase superfamily protein
AT5G58620.1	AT5G58620	939	999	695	693	828	855	6.19284	-0.68913	0.000648239	zinc finger (CCCH-type) family protein
AT4G35480.1	AT4G35480	1429	1311	885	1023	1240	965	6.63913	-0.698088	0.000648357	RING-H2 finger A3B
AT1G47610.1	AT1G47610	22	18	24	148	69	87	2.3285	1.66981	0.000652139	Transducin/WD40 repeat-like superfamily protein
AT3G12500.1	AT3G12500	40	36	26	150	82	170	2.76739	1.43727	0.000652139	basic chitinase
AT2G19860.1	AT2G19860	739	657	602	661	640	520	5.80683	-0.68874	0.000655957	hexokinase 2
AT2G32140.1	AT2G32140	6	20	1	28	112	185	2.23403	3.08948	0.000664503	transmembrane receptors
AT2G42540.3	AT2G42540	369	223	382	1041	753	1546	5.83052	1.19354	0.000666268	cold-regulated 15a
AT3G25290.2	AT3G25290	512	668	430	1162	1332	1461	6.22077	0.750409	0.000666505	Auxin-responsive family protein
AT2G21170.1	AT2G21170	5344	4659	3905	4822	4325	3746	8.60919	-0.656405	0.000669816	triosephosphate isomerase
AT3G20390.1	AT3G20390	2839	2554	2165	5386	6361	5577	8.3852	0.648733	0.000669816	endoribonuclease L-PSP family protein
AT5G61660.1	AT5G61660	155	96	79	285	314	309	4.05208	0.934137	0.000669816	glycine-rich protein
AT5G45340.2	AT5G45340	67	45	32	71	330	496	3.75369	2.12772	0.000679069	cytochrome P450, family 707, subfamily A, polypeptide 3
AT3G23810.1	AT3G23810	1815	1167	1275	5384	3150	3260	7.72771	0.917898	0.000687295	S-adenosyl-l-homocysteine (SAH) hydrolase 2
AT5G02260.1	AT5G02260	1152	1092	856	671	1052	929	6.40126	-0.767753	0.000697437	expansin A9
AT2G18890.1	AT2G18890	165	162	127	102	107	129	3.56149	-0.970608	0.000706291	Protein kinase superfamily protein
AT2G40140.2	AT2G40140	398	408	273	579	1443	1614	5.94878	1.22127	0.000706362	zinc finger (CCCH-type) family protein
AT1G49310.1	AT1G49310	23	13	25	8	7	6	0.451085	-2.09119	0.000711611	unknown protein
AT3G11700.1	AT3G11700	573	656	408	1192	1290	1350	6.19726	0.689576	0.000716852	FASCICLIN-like arabinogalactan protein 18 precursor
AT5G41750.1	AT5G41750	15	25	4	33	141	202	2.48216	2.59959	0.000717105	Disease resistance protein (TIR-NBS-LRR class) family
AT4G08170.2	AT4G08170	306	327	304	698	851	782	5.46204	0.75084	0.000723867	Inositol 1,3,4-trisphosphate 5/6-kinase family protein
AT5G62350.1	AT5G62350	2161	1689	1448	1588	1607	1727	7.21576	-0.646064	0.000731123	Plant invertase/pectin methylesterase inhibitor superfamily protein
AT2G01080.1	AT2G01080	596	628	491	428	563	534	5.57219	-0.718693	0.000737522	Late embryogenesis abundant (LEA) hydroxyproline-rich glycoprotein family
AT1G70370.2	AT1G70370	2304	1763	1691	4818	4134	4373	8.00063	0.660937	0.000741456	polygalacturonase 2
AT2G16060.1	AT2G16060	74	36	42	20	32	18	1.77982	-1.64623	0.000742137	hemoglobin 1
AT3G11580.2	AT3G11580	51	49	26	129	127	161	2.87971	1.19957	0.000742137	AP2/B3-like transcriptional factor family protein
AT3G28830.1	AT3G28830	1256	5127	646	252	496	1032	7.10406	-2.46967	0.000742583	Protein of unknown function (DUF1216)
AT4G39260.4	AT4G39260	2231	1695	981	1160	1329	1474	7.00898	-0.814396	0.000743337	cold, circadian rhythm, and RNA binding 1
AT1G70370.1	AT1G70370	2322	1778	1700	4839	4164	4404	8.01003	0.659556	0.000748748	polygalacturonase 2
AT4G03926.1	AT4G03926	8	10	4	26	55	46	1.11079	1.986	0.000749495	pseudogene
AT1G22410.1	AT1G22410	1783	1279	1330	1580	1064	1094	6.90277	-0.786861	0.000754707	Class-II DAHP synthetase family protein
AT3G02550.1	AT3G02550	1354	1198	947	1197	1026	660	6.55157	-0.823815	0.000760448	LOB domain-containing protein 41
AT1G12320.1	AT1G12320	190	224	162	501	470	451	4.75228	0.752759	0.000764642	Protein of unknown function (DUF1442)
AT3G06070.1	AT3G06070	34	33	21	75	124	161	2.6047	1.49874	0.000765299	unknown protein
AT3G25290.1	AT3G25290	523	677	439	1173	1348	1478	6.24035	0.740479	0.000765299	Auxin-responsive family protein
AT1G21000.1	AT1G21000	371	453	343	257	370	338	4.98151	-0.828469	0.000776402	PLATZ transcription factor family protein
AT2G30650.1	AT2G30650	2915	2277	2510	2598	1807	1077	7.63044	-1.05866	0.000781123	ATP-dependent caseinolytic (Clp) protease/crotonase family protein
AT2G40140.1	AT2G40140	408	421	282	593	1481	1642	5.9833	1.21004	0.000783495	zinc finger (CCCH-type) family protein
AT3G09910.2	AT3G09910	50	75	80	180	262	339	3.72254	1.34167	0.000798211	RAB GTPase homolog C2B
AT3G15820.1	AT3G15820	286	249	227	564	584	697	5.13621	0.725274	0.000802818	phosphatidic acid phosphatase-related / PAP2-related
AT1G28480.1	AT1G28480	20	6	14	73	64	54	1.69667	1.69688	0.00080545	Thioredoxin superfamily protein
AT2G31380.1	AT2G31380	566	490	665	421	513	461	5.55059	-0.890207	0.00080658	salt tolerance homologue
AT2G23010.2	AT2G23010	20	13	16	93	56	63	1.86462	1.55335	0.000813558	serine carboxypeptidase-like 9
AT5G61520.1	AT5G61520	265	217	201	167	151	221	4.18034	-0.889418	0.000814162	Major facilitator superfamily protein
AT2G39700.1	AT2G39700	1516	2150	1076	1188	1404	1328	6.98752	-0.806166	0.000819046	expansin A4
AT1G69530.1	AT1G69530	864	1200	1186	853	842	969	6.47347	-0.87471	0.000842617	expansin A1
AT4G27590.2	AT4G27590	39	33	39	22	18	16	1.39056	-1.54546	0.000842617	Heavy metal transport/detoxification superfamily protein
AT1G01340.2	AT1G01340	40	32	20	15	5	16	1.02222	-1.86621	0.000845505	cyclic nucleotide gated channel 10
AT5G16240.1	AT5G16240	141	135	90	339	329	278	4.14266	0.833112	0.000845505	Plant stearoyl-acyl-carrier-protein desaturase family protein
AT5G21105.2	AT5G21105	611	620	363	1545	1216	1092	6.18166	0.743771	0.000850667	Plant L-ascorbate oxidase
AT3G54810.1	AT3G54810	325	373	235	572	924	1175	5.57934	0.982252	0.000855043	Plant-specific GATA-type zinc finger transcription factor family protein
AT3G30340.1	AT3G30340	70	77	63	154	325	244	3.6442	1.23086	0.00085605	nodulin MtN21 /EamA-like transporter family protein
AT4G16160.1	AT4G16160	0	0	0	5	5	21	-0.762804	6.14863	0.000864909	Mitochondrial import inner membrane translocase subunit Tim17/Tim22/Tim23 family protein
AT5G12330.4	AT5G12330	367	505	283	236	354	310	4.92515	-0.897352	0.000865197	Lateral root primordium (LRP) protein-related
AT2G30870.1	AT2G30870	1278	1050	804	2412	2367	2242	7.09016	0.629731	0.000869134	glutathione S-transferase PHI 10
AT3G16570.1	AT3G16570	276	199	231	608	578	572	5.05449	0.756771	0.000869134	rapid alkalinization factor 23
AT1G08440.1	AT1G08440	7	11	8	68	35	39	1.26922	1.87927	0.000872813	Aluminium activated malate transporter family protein
AT1G56100.3	AT1G56100	55	15	30	63	221	539	3.57464	2.51144	0.000872813	Plant invertase/pectin methylesterase inhibitor superfamily protein
AT1G78570.1	AT1G78570	1459	885	1068	5092	2836	2461	7.50032	1.04797	0.000874094	rhamnose biosynthesis 1
AT3G54030.1	AT3G54030	217	174	162	426	447	486	4.68995	0.7497	0.00087847	Protein kinase protein with tetratricopeptide repeat domain
AT5G54940.1	AT5G54940	852	938	589	1507	2066	2691	6.84305	0.863734	0.00087847	Translation initiation factor SUI1 family protein
AT1G01070.1	AT1G01070	184	109	160	526	423	376	4.57249	0.980203	0.000884969	nodulin MtN21 /EamA-like transporter family protein
AT5G15960.1	AT5G15960	81	26	112	315	278	665	4.26545	1.90075	0.000885863	stress-responsive protein (KIN1) / stress-induced protein (KIN1)
AT2G07717.1	AT2G07717	404	674	315	273	294	423	5.14688	-1.0261	0.000891825	pseudogene
AT1G70210.1	AT1G70210	1092	1076	772	950	914	918	6.37673	-0.620275	0.00090204	CYCLIN D1;1
AT5G21105.1	AT5G21105	825	777	479	2055	1629	1367	6.56821	0.750416	0.000903604	Plant L-ascorbate oxidase
AT4G27720.1	AT4G27720	509	398	323	902	933	964	5.76069	0.649965	0.000904685	Major facilitator superfamily protein
AT1G72510.2	AT1G72510	142	143	137	310	382	537	4.4698	0.981429	0.00090714	Protein of unknown function (DUF1677)
AT1G29395.1	AT1G29395	165	125	172	393	397	671	4.68266	1.08558	0.000940058	COLD REGULATED 314 INNER MEMBRANE 1
AT1G70690.1	AT1G70690	69	61	53	164	256	167	3.37674	1.13374	0.000940058	Receptor-like protein kinase-related family protein
AT1G16400.1	AT1G16400	6	1	4	20	24	38	0.506165	2.32287	0.000944486	cytochrome P450, family 79, subfamily F, polypeptide 2
AT5G10280.1	AT5G10280	30	29	29	12	17	12	1.03876	-1.64974	0.000944486	myb domain protein 92
AT3G25730.1	AT3G25730	20	22	8	3	8	2	0.106477	-2.41895	0.000950228	ethylene response DNA binding factor 3
AT5G14700.1	AT5G14700	351	221	311	814	696	866	5.44917	0.85992	0.000950228	NAD(P)-binding Rossmann-fold superfamily protein
AT1G73600.2	AT1G73600	306	201	196	546	965	526	5.18434	0.996673	0.000964072	S-adenosyl-L-methionine-dependent methyltransferases superfamily protein
AT1G12780.1	AT1G12780	1143	1026	911	882	951	1048	6.44503	-0.647541	0.000984512	UDP-D-glucose/UDP-D-galactose 4-epimerase 1
AT3G07360.3	AT3G07360	417	469	351	785	1160	1170	5.86709	0.783754	0.00100318	plant U-box 9
AT4G09460.1	AT4G09460	450	431	426	348	369	435	5.18404	-0.745377	0.00100678	myb domain protein 6
AT5G49800.1	AT5G49800	189	186	149	152	141	126	3.805	-0.871213	0.0010119	Polyketide cyclase/dehydrase and lipid transport superfamily protein
AT1G75220.1	AT1G75220	483	475	373	945	1112	982	5.88155	0.644366	0.00101704	Major facilitator superfamily protein
AT4G36410.1	AT4G36410	96	129	78	25	50	75	2.79602	-1.55096	0.00102369	ubiquitin-conjugating enzyme 17
AT1G79700.2	AT1G79700	630	615	528	476	634	359	5.58334	-0.825755	0.0010256	Integrase-type DNA-binding superfamily protein
AT1G21000.2	AT1G21000	345	433	317	227	344	318	4.87938	-0.853389	0.00102971	PLATZ transcription factor family protein
AT1G69530.3	AT1G69530	700	950	949	705	689	769	6.15837	-0.852302	0.00103138	expansin A1
AT4G32890.1	AT4G32890	56	49	50	26	37	25	1.90484	-1.3696	0.0010341	GATA transcription factor 9
AT5G63970.1	AT5G63970	139	145	141	302	420	489	4.46002	0.947067	0.0010341	Copine (Calcium-dependent phospholipid-binding protein) family
AT5G49360.1	AT5G49360	343	159	223	583	695	785	5.21305	0.964689	0.00103499	beta-xylosidase 1
AT1G79700.1	AT1G79700	593	557	494	447	584	336	5.47649	-0.820984	0.00104412	Integrase-type DNA-binding superfamily protein
AT3G23150.1	AT3G23150	324	241	185	138	248	118	4.22266	-1.10019	0.00104412	Signal transduction histidine kinase, hybrid-type, ethylene sensor
AT3G56880.1	AT3G56880	413	425	194	646	1061	1460	5.7826	1.11162	0.00104412	VQ motif-containing protein
AT5G59290.1	AT5G59290	584	475	406	1232	1012	1099	6.01586	0.646325	0.00105386	UDP-glucuronic acid decarboxylase 3
AT5G20900.1	AT5G20900	1298	1168	1142	2665	2748	3005	7.3403	0.661929	0.00105527	jasmonate-zim-domain protein 12
AT1G67720.1	AT1G67720	468	475	393	1212	1132	861	5.93184	0.707383	0.00107166	Leucine-rich repeat protein kinase family protein
AT2G27500.3	AT2G27500	67	71	44	151	181	246	3.35629	1.13228	0.0010782	Glycosyl hydrolase superfamily protein
AT1G69530.4	AT1G69530	694	945	943	701	686	765	6.14972	-0.850262	0.00108873	expansin A1
AT1G48300.1	AT1G48300	1065	1046	486	550	103	480	5.82443	-1.70789	0.00111201	unknown protein
AT2G27500.1	AT2G27500	70	79	48	163	192	265	3.45895	1.11785	0.00111201	Glycosyl hydrolase superfamily protein
AT2G32290.1	AT2G32290	21	21	13	90	50	89	1.97815	1.51511	0.00111201	beta-amylase 6
AT4G29020.1	AT4G29020	274	160	178	556	459	564	4.87635	0.824277	0.00111201	glycine-rich protein
AT5G11360.2	AT5G11360	49	63	26	133	144	212	3.07571	1.30254	0.00112524	Interleukin-1 receptor-associated kinase 4 protein
AT3G12520.1	AT3G12520	309	229	179	552	575	560	5.01469	0.702881	0.00113601	sulfate transporter 4;2
AT1G50040.1	AT1G50040	10	4	1	20	41	48	0.865808	2.34106	0.00113677	Protein of unknown function (DUF1005)
AT2G17280.2	AT2G17280	616	452	395	1497	1378	873	6.11557	0.816691	0.00114033	Phosphoglycerate mutase family protein
AT1G79840.2	AT1G79840	186	199	121	107	115	150	3.70322	-0.975276	0.00114888	HD-ZIP IV family of homeobox-leucine zipper protein with lipid-binding START domain
AT5G58000.1	AT5G58000	121	99	102	286	334	257	4.01803	0.889453	0.00114897	Reticulon family protein
AT2G17280.1	AT2G17280	625	455	406	1531	1401	887	6.1413	0.82004	0.00117274	Phosphoglycerate mutase family protein
AT1G66380.1	AT1G66380	17	25	26	9	11	5	0.615571	-2.0046	0.00117924	myb domain protein 114
AT2G30550.2	AT2G30550	72	44	65	182	194	207	3.36995	1.12266	0.00117924	alpha/beta-Hydrolases superfamily protein
AT3G07360.2	AT3G07360	425	483	362	803	1184	1194	5.90024	0.775307	0.00117924	plant U-box 9
AT3G07280.1	AT3G07280	465	836	317	261	383	427	5.32255	-1.11673	0.00118032	pseudogene
AT5G05365.1	AT5G05365	7	14	5	39	37	56	1.19085	1.79557	0.00118103	Heavy metal transport/detoxification superfamily protein
AT1G73602.1	AT1G73602	304	201	198	542	947	521	5.17193	0.97613	0.00118395	conserved peptide upstream open reading frame 32
AT1G64690.1	AT1G64690	206	174	162	148	161	110	3.83753	-0.922703	0.00118472	branchless trichome
AT1G69530.2	AT1G69530	883	1238	1224	899	877	997	6.52118	-0.859172	0.00118472	expansin A1
AT1G55265.1	AT1G55265	58	49	36	158	165	122	2.99697	1.09895	0.00118722	Protein of unknown function, DUF538
AT3G07360.1	AT3G07360	435	487	371	817	1211	1212	5.92658	0.775455	0.001197	plant U-box 9
ATMG00090.1	ATMG00090	143	357	173	131	99	164	4.02039	-1.32604	0.00119818	structural constituent of ribosome;protein binding
AT5G61810.1	AT5G61810	352	235	243	748	607	659	5.25671	0.732271	0.00121331	Mitochondrial substrate carrier family protein
AT4G28270.1	AT4G28270	309	287	269	235	282	227	4.57153	-0.77427	0.00121706	RING membrane-anchor 2
AT5G03360.1	AT5G03360	41	19	22	111	134	78	2.46501	1.4407	0.00121759	DC1 domain-containing protein
AT5G59290.2	AT5G59290	576	470	400	1202	994	1085	5.9921	0.638364	0.00123015	UDP-glucuronic acid decarboxylase 3
AT1G02340.1	AT1G02340	112	93	92	69	75	63	2.92357	-1.0734	0.00123093	basic helix-loop-helix (bHLH) DNA-binding superfamily protein
AT3G16510.1	AT3G16510	20	23	14	55	81	96	2.00605	1.48308	0.00123389	Calcium-dependent lipid-binding (CaLB domain) family protein
AT1G08500.1	AT1G08500	12	24	21	88	75	76	2.04201	1.48952	0.0012376	early nodulin-like protein 18
AT1G73600.1	AT1G73600	305	201	198	542	949	521	5.17348	0.975739	0.0012376	S-adenosyl-L-methionine-dependent methyltransferases superfamily protein
AT4G21630.1	AT4G21630	871	621	755	1758	1874	1864	6.70215	0.726124	0.0012376	Subtilase family protein
AT5G15310.1	AT5G15310	76	53	81	225	199	255	3.58561	1.11645	0.0012627	myb domain protein 16
AT5G01075.1	AT5G01075	62	76	47	179	189	174	3.30085	1.00746	0.00126367	Glycosyl hydrolase family 35 protein
AT3G46130.1	AT3G46130	6	6	0	29	22	26	0.448445	2.13697	0.00126897	myb domain protein 48
AT4G39260.1	AT4G39260	3300	2551	1453	1790	2020	2220	7.59408	-0.782469	0.00126897	cold, circadian rhythm, and RNA binding 1
AT2G35470.1	AT2G35470	131	142	94	288	344	309	4.14216	0.818021	0.00127082	unknown protein
AT5G38710.1	AT5G38710	61	39	31	102	182	184	3.01333	1.31203	0.00129945	Methylenetetrahydrofolate reductase family protein
AT1G23710.1	AT1G23710	89	84	47	137	319	336	3.74752	1.3295	0.00133367	Protein of unknown function (DUF1645)
AT1G19770.1	AT1G19770	385	402	261	575	1229	1310	5.78142	1.03997	0.00133788	purine permease 14
AT5G27660.1	AT5G27660	386	414	226	315	286	267	4.788	-0.76797	0.00133865	Trypsin family protein with PDZ domain
AT3G25770.1	AT3G25770	0	1	0	35	8	7	-0.227803	4.72212	0.00133993	allene oxide cyclase 2
AT3G48580.1	AT3G48580	92	42	73	168	269	330	3.7003	1.33085	0.00134013	xyloglucan endotransglucosylase/hydrolase 11
AT1G04430.2	AT1G04430	851	750	661	1879	1758	1514	6.64155	0.635785	0.00134394	S-adenosyl-L-methionine-dependent methyltransferases superfamily protein
AT1G50630.2	AT1G50630	93	80	81	256	207	250	3.71071	0.931276	0.0013447	Protein of unknown function (DUF3537)
AT2G16660.1	AT2G16660	278	236	139	522	460	766	4.99621	0.902813	0.0013447	Major facilitator superfamily protein
AT2G42540.2	AT2G42540	673	441	767	2014	1406	2817	6.74446	1.13577	0.0013447	cold-regulated 15a
AT2G41415.1	AT2G41415	6	14	3	0	0	2	-0.927367	-3.77496	0.00134739	Maternally expressed gene (MEG) family protein
AT5G50790.1	AT5G50790	498	335	344	304	379	175	4.92116	-1.00234	0.00135882	Nodulin MtN3 family protein
ATCG00740.1	ATCG00740	1235	2300	1069	926	964	1420	6.87982	-1.01388	0.00135898	RNA polymerase subunit alpha
AT1G55120.1	AT1G55120	681	496	490	548	491	496	5.54761	-0.667023	0.00136854	beta-fructofuranosidase 5
AT1G30320.1	AT1G30320	132	135	91	342	248	364	4.14134	0.874011	0.00137004	Remorin family protein
AT5G43760.1	AT5G43760	584	477	464	1048	1188	1348	6.10555	0.680615	0.00137009	3-ketoacyl-CoA synthase 20
AT1G77420.1	AT1G77420	157	171	118	331	407	379	4.39905	0.781877	0.00140188	alpha/beta-Hydrolases superfamily protein
AT1G04430.1	AT1G04430	864	764	673	1911	1799	1532	6.66658	0.636208	0.00140281	S-adenosyl-L-methionine-dependent methyltransferases superfamily protein
AT4G03175.1	AT4G03175	34	52	43	25	22	21	1.6196	-1.48733	0.00140281	Protein kinase superfamily protein
AT1G04770.1	AT1G04770	415	280	158	875	689	663	5.34694	0.879821	0.00142366	Tetratricopeptide repeat (TPR)-like superfamily protein
AT1G23040.1	AT1G23040	184	211	194	147	155	168	3.98406	-0.891735	0.00142464	hydroxyproline-rich glycoprotein family protein
AT1G62810.1	AT1G62810	238	180	180	488	454	502	4.78606	0.721712	0.00142785	Copper amine oxidase family protein
AT3G45160.1	AT3G45160	211	196	123	138	146	74	3.72369	-1.09471	0.00143283	Putative membrane lipoprotein
AT3G49307.1	AT3G49307	3	1	2	10	21	37	0.220833	2.90106	0.00144852	Expressed protein
AT2G38240.1	AT2G38240	78	32	98	178	314	685	4.17549	1.89592	0.00146268	2-oxoglutarate (2OG) and Fe(II)-dependent oxygenase superfamily protein
AT3G60420.2	AT3G60420	7	4	1	17	26	47	0.618696	2.37001	0.00147568	Phosphoglycerate mutase family protein
AT1G78490.1	AT1G78490	1758	1182	1261	3100	3325	3461	7.56242	0.68632	0.00147603	cytochrome P450, family 708, subfamily A, polypeptide 3
AT1G55120.2	AT1G55120	673	488	480	537	488	488	5.5253	-0.664455	0.00149741	beta-fructofuranosidase 5
AT1G55120.3	AT1G55120	641	479	466	518	475	476	5.47945	-0.658787	0.00149741	beta-fructofuranosidase 5
AT2G46960.2	AT2G46960	24	3	15	62	78	107	1.99105	2.00266	0.00149741	cytochrome P450, family 709, subfamily B, polypeptide 1
AT2G47190.1	AT2G47190	21	28	8	60	78	141	2.19806	1.77776	0.00149741	myb domain protein 2
AT3G14870.2	AT3G14870	270	226	173	489	542	527	4.90888	0.683108	0.00149741	Plant protein of unknown function (DUF641)
AT4G33565.1	AT4G33565	110	143	126	84	99	85	3.2894	-1.06831	0.00153829	RING/U-box superfamily protein
AT5G61810.2	AT5G61810	334	233	235	703	584	622	5.19065	0.703878	0.00154116	Mitochondrial substrate carrier family protein
AT4G36540.2	AT4G36540	438	482	347	380	412	376	5.15299	-0.663865	0.00155299	BR enhanced expression 2
AT5G52120.1	AT5G52120	44	42	31	113	119	137	2.73373	1.1141	0.00155299	phloem protein 2-A14
AT4G36540.1	AT4G36540	476	504	369	410	446	397	5.24707	-0.652273	0.00155733	BR enhanced expression 2
AT2G36270.1	AT2G36270	1056	1123	743	863	941	946	6.36396	-0.625287	0.00156675	Basic-leucine zipper (bZIP) transcription factor family protein
AT4G30870.1	AT4G30870	195	218	196	171	159	171	4.04609	-0.845327	0.00157042	Restriction endonuclease, type II-like superfamily protein
AT3G12520.2	AT3G12520	302	228	179	536	565	548	4.98889	0.684911	0.00157077	sulfate transporter 4;2
AT5G20430.1	AT5G20430	4	8	4	0	0	1	-1.2833	-4.04228	0.00157202	Mob1/phocein family protein
AT3G28340.1	AT3G28340	3	5	5	13	47	57	0.929726	2.58115	0.00157708	galacturonosyltransferase-like 10
AT5G63970.2	AT5G63970	133	135	132	280	389	455	4.36013	0.928193	0.00157708	Copine (Calcium-dependent phospholipid-binding protein) family
AT4G10390.1	AT4G10390	62	58	70	177	191	232	3.4216	1.08634	0.00160076	Protein kinase superfamily protein
AT4G01430.2	AT4G01430	14	31	24	100	88	90	2.2605	1.43418	0.00160302	nodulin MtN21 /EamA-like transporter family protein
AT1G27370.2	AT1G27370	1306	909	993	1082	917	938	6.49157	-0.681853	0.00161388	squamosa promoter binding protein-like 10
AT4G08170.1	AT4G08170	249	284	243	543	699	671	5.18278	0.741581	0.00161506	Inositol 1,3,4-trisphosphate 5/6-kinase family protein
AT1G56100.2	AT1G56100	70	16	34	71	249	608	3.75385	2.43143	0.00162579	Plant invertase/pectin methylesterase inhibitor superfamily protein
AT2G34070.1	AT2G34070	178	206	153	388	440	527	4.67392	0.785339	0.00162579	TRICHOME BIREFRINGENCE-LIKE 37
AT3G14172.2	AT3G14172	931	806	708	845	785	702	6.12045	-0.618054	0.00162579	unknown protein
AT5G19520.1	AT5G19520	3	0	1	15	22	9	-0.242265	2.89511	0.00163794	mechanosensitive channel of small conductance-like 9
AT1G77640.1	AT1G77640	1	3	3	13	21	35	0.255983	2.69093	0.00164445	Integrase-type DNA-binding superfamily protein
AT1G66110.1	AT1G66110	8	3	5	1	0	0	-1.28418	-4.04028	0.00164453	Family of unknown function (DUF577)
AT2G46960.1	AT2G46960	21	3	15	53	78	100	1.90064	2.00465	0.001647	cytochrome P450, family 709, subfamily B, polypeptide 1
AT5G37770.1	AT5G37770	356	571	154	742	1450	1741	6.01899	1.36785	0.00165423	EF hand calcium-binding protein family
AT1G78560.1	AT1G78560	345	278	241	658	613	712	5.26443	0.655317	0.00165497	Sodium Bile acid symporter family
AT1G45201.2	AT1G45201	133	114	134	427	342	291	4.27996	0.90435	0.00166139	triacylglycerol lipase-like 1
AT2G22590.1	AT2G22590	26	10	27	8	5	7	0.469759	-2.21235	0.00166489	UDP-Glycosyltransferase superfamily protein
AT4G39260.2	AT4G39260	3066	2373	1365	1668	1925	2093	7.49885	-0.765626	0.00166489	cold, circadian rhythm, and RNA binding 1
AT2G40435.1	AT2G40435	30	33	17	81	95	101	2.29967	1.25815	0.0016705	unknown protein
AT3G57150.1	AT3G57150	3186	4019	1717	2461	2017	2660	7.87069	-0.837126	0.00169954	homologue of NAP57
AT5G39420.1	AT5G39420	245	615	161	120	141	244	4.52986	-1.52683	0.00170329	CDC2C
AT5G55120.1	AT5G55120	604	628	530	1248	1324	1446	6.28727	0.633604	0.00171836	galactose-1-phosphate guanylyltransferase (GDP)s;GDP-D-glucose phosphorylases;quercetin 4'-O-glucosyltransferases
AT3G19930.1	AT3G19930	221	131	134	388	448	406	4.53736	0.81667	0.00172821	sugar transporter 4
AT3G26450.1	AT3G26450	162	111	134	343	324	432	4.3439	0.875363	0.00173202	Polyketide cyclase/dehydrase and lipid transport superfamily protein
AT2G46860.1	AT2G46860	46	150	24	9	14	32	2.10396	-2.48757	0.00173525	pyrophosphorylase 3
AT3G23570.1	AT3G23570	35	34	44	101	159	163	2.86803	1.32679	0.0017354	alpha/beta-Hydrolases superfamily protein
AT2G27500.2	AT2G27500	66	70	45	148	177	230	3.31457	1.07925	0.00174087	Glycosyl hydrolase superfamily protein
AT4G29210.2	AT4G29210	466	448	368	903	1010	958	5.81155	0.614261	0.00174087	gamma-glutamyl transpeptidase 4
AT2G33810.1	AT2G33810	2137	2298	1794	2173	1960	1789	7.46923	-0.6267	0.00176236	squamosa promoter binding protein-like 3
AT2G42540.1	AT2G42540	608	403	683	1721	1247	2571	6.57981	1.11795	0.00176865	cold-regulated 15a
AT3G16150.1	AT3G16150	201	282	185	655	912	418	5.13845	1.01799	0.00176865	N-terminal nucleophile aminohydrolases (Ntn hydrolases) superfamily protein
AT4G29210.1	AT4G29210	481	461	381	928	1046	989	5.85696	0.614071	0.00177448	gamma-glutamyl transpeptidase 4
AT5G65470.1	AT5G65470	454	525	385	1167	962	1009	5.92371	0.64971	0.00177619	O-fucosyltransferase family protein
AT3G54990.1	AT3G54990	31	28	25	78	101	112	2.37228	1.24243	0.00179358	Integrase-type DNA-binding superfamily protein
AT4G21850.1	AT4G21850	22	29	7	57	99	101	2.1135	1.63772	0.00179934	methionine sulfoxide reductase B9
AT5G08330.1	AT5G08330	155	162	74	287	344	526	4.3612	1.05281	0.00179934	TCP family transcription factor
AT4G13540.1	AT4G13540	2069	2225	1764	1745	1885	2091	7.42697	-0.635481	0.00180804	unknown protein
AT4G39260.3	AT4G39260	2944	2292	1311	1579	1855	2026	7.44225	-0.76842	0.00181541	cold, circadian rhythm, and RNA binding 1
AT2G42900.1	AT2G42900	314	272	258	201	257	265	4.53247	-0.775787	0.00181961	Plant basic secretory protein (BSP) family protein
AT5G26340.1	AT5G26340	629	793	323	330	374	552	5.46362	-0.984604	0.00183705	Major facilitator superfamily protein
AT5G41750.2	AT5G41750	12	30	5	30	153	211	2.55066	2.56277	0.00184494	Disease resistance protein (TIR-NBS-LRR class) family
AT2G27990.1	AT2G27990	468	395	391	311	440	352	5.1186	-0.740428	0.00186967	BEL1-like homeodomain 8
AT2G47460.1	AT2G47460	29	13	19	118	87	58	2.15587	1.55489	0.00187128	myb domain protein 12
AT4G37870.1	AT4G37870	11367	9026	8906	10151	9222	8488	9.70362	-0.627676	0.00187128	phosphoenolpyruvate carboxykinase 1
AT4G08170.3	AT4G08170	249	284	245	542	699	671	5.18392	0.736464	0.00188065	Inositol 1,3,4-trisphosphate 5/6-kinase family protein
AT5G54200.1	AT5G54200	427	359	346	367	343	337	4.99686	-0.666947	0.00189982	Transducin/WD40 repeat-like superfamily protein
AT5G11790.1	AT5G11790	481	490	395	859	1210	1190	5.96053	0.705153	0.00190661	N-MYC downregulated-like 2
AT4G26740.1	AT4G26740	0	0	0	7	12	3	-1.09549	5.65694	0.00192212	seed gene 1
AT4G34050.1	AT4G34050	3218	2875	2872	3348	2363	2435	7.97488	-0.703826	0.00192289	S-adenosyl-L-methionine-dependent methyltransferases superfamily protein
AT2G28930.1	AT2G28930	470	396	311	378	372	347	5.04763	-0.640225	0.00192305	protein kinase 1B
AT5G16570.1	AT5G16570	34	41	19	100	148	91	2.56178	1.32057	0.00194222	glutamine synthetase 1;4
AT1G11840.2	AT1G11840	6054	4949	4687	14567	12456	9907	9.46136	0.680506	0.00194617	glyoxalase I homolog
AT1G18730.2	AT1G18730	568	483	352	464	446	381	5.28988	-0.654068	0.00194617	NDH dependent flow 6
AT3G46130.2	AT3G46130	6	7	5	36	29	27	0.723557	1.78974	0.00194799	myb domain protein 48
AT1G27370.4	AT1G27370	1300	898	990	1078	915	939	6.48528	-0.675553	0.00195396	squamosa promoter binding protein-like 10
AT3G21700.3	AT3G21700	299	775	256	184	223	342	4.9726	-1.35478	0.00195657	Ras-related small GTP-binding family protein
AT1G11840.6	AT1G11840	5943	4878	4618	14219	12240	9768	9.4355	0.675872	0.00195677	glyoxalase I homolog
AT1G11840.4	AT1G11840	5943	4876	4616	14213	12231	9760	9.43478	0.675357	0.00198635	glyoxalase I homolog
AT3G10720.2	AT3G10720	138	79	87	329	226	307	3.96838	0.961164	0.00198839	Plant invertase/pectin methylesterase inhibitor superfamily
AT5G17230.3	AT5G17230	3332	2735	2905	2979	2566	2901	7.99645	-0.650623	0.00201409	PHYTOENE SYNTHASE
AT3G16720.1	AT3G16720	87	73	31	104	307	477	3.81667	1.72443	0.00202193	TOXICOS EN LEVADURA 2
AT1G11840.1	AT1G11840	5959	4895	4645	14310	12269	9797	9.44138	0.675899	0.00203018	glyoxalase I homolog
AT5G12330.3	AT5G12330	233	277	189	163	226	186	4.23434	-0.826831	0.00203018	Lateral root primordium (LRP) protein-related
AT1G11840.3	AT1G11840	5932	4872	4608	14175	12198	9738	9.43166	0.673812	0.00203102	glyoxalase I homolog
AT2G40480.1	AT2G40480	579	487	382	1127	1116	970	5.97288	0.610912	0.00204233	Plant protein of unknown function (DUF827)
AT4G34630.1	AT4G34630	203	231	199	541	464	534	4.87768	0.719936	0.00206102	unknown protein
AT4G01060.1	AT4G01060	19	10	16	57	51	118	1.91259	1.76633	0.00208567	CAPRICE-like MYB3
AT3G24225.1	AT3G24225	0	0	0	8	5	7	-1.18145	5.52162	0.00209804	CLAVATA3/ESR-RELATED 19
AT1G07750.1	AT1G07750	1133	992	949	2157	2402	2386	7.07994	0.619498	0.00210476	RmlC-like cupins superfamily protein
AT5G17230.2	AT5G17230	3383	2747	2950	3038	2569	2925	8.01281	-0.653669	0.00211276	PHYTOENE SYNTHASE
AT4G38960.1	AT4G38960	158	156	226	124	141	116	3.81481	-1.10219	0.00211981	B-box type zinc finger family protein
AT2G28930.3	AT2G28930	490	406	323	398	384	358	5.09999	-0.635438	0.0021244	protein kinase 1B
AT3G09770.2	AT3G09770	828	740	674	647	759	729	5.99848	-0.623393	0.0021244	RING/U-box superfamily protein
AT5G17230.1	AT5G17230	3504	2848	3063	3148	2675	3031	8.06566	-0.652698	0.0021244	PHYTOENE SYNTHASE
AT5G43600.1	AT5G43600	887	778	770	813	807	688	6.11788	-0.637849	0.00213139	ureidoglycolate amidohydrolase
AT1G01070.2	AT1G01070	174	98	154	482	395	350	4.4711	0.955719	0.00213484	nodulin MtN21 /EamA-like transporter family protein
AT1G10522.2	AT1G10522	449	438	247	276	330	358	4.93384	-0.75547	0.00213651	unknown protein
AT1G18730.4	AT1G18730	621	513	378	501	482	414	5.39941	-0.647181	0.00215647	NDH dependent flow 6
AT1G64900.1	AT1G64900	399	309	336	870	820	757	5.56008	0.669247	0.00217494	cytochrome P450, family 89, subfamily A, polypeptide 2
AT3G25500.1	AT3G25500	698	595	555	1445	1276	1412	6.33648	0.607966	0.00217494	formin homology 1
AT2G38170.3	AT2G38170	1023	544	704	1413	2412	2849	6.8854	1.01017	0.00217748	cation exchanger 1
AT5G02190.1	AT5G02190	606	596	461	605	504	437	5.54828	-0.653198	0.00218293	Eukaryotic aspartyl protease family protein
AT5G49180.1	AT5G49180	635	478	554	1213	1497	1293	6.25626	0.701063	0.00220112	Plant invertase/pectin methylesterase inhibitor superfamily
AT1G71710.2	AT1G71710	561	489	506	549	438	440	5.45526	-0.689248	0.00220263	DNAse I-like superfamily protein
AT1G69530.5	AT1G69530	571	796	776	609	580	646	5.89426	-0.810278	0.00220902	expansin A1
AT3G27025.1	AT3G27025	8	21	23	101	59	104	2.12427	1.73795	0.00221466	unknown protein
AT2G43290.1	AT2G43290	297	454	163	637	906	1225	5.59647	1.08694	0.00225452	Calcium-binding EF-hand family protein
AT3G03520.1	AT3G03520	24	30	26	137	74	93	2.39878	1.35848	0.00226812	non-specific phospholipase C3
AT1G11840.5	AT1G11840	5379	4513	4237	12973	11122	8880	9.30313	0.667334	0.00229655	glyoxalase I homolog
AT3G55120.1	AT3G55120	446	281	327	1122	853	716	5.64662	0.797741	0.00230216	Chalcone-flavanone isomerase family protein
AT1G27370.3	AT1G27370	1306	896	993	1088	915	943	6.48985	-0.671896	0.00230866	squamosa promoter binding protein-like 10
AT2G32990.1	AT2G32990	349	225	327	789	988	674	5.49008	0.870809	0.00233449	glycosyl hydrolase 9B8
AT1G80820.1	AT1G80820	2	2	5	15	23	34	0.337612	2.39167	0.00233668	cinnamoyl coa reductase
AT1G60260.1	AT1G60260	381	341	352	746	849	992	5.62839	0.706013	0.00234834	beta glucosidase 5
AT5G19110.1	AT5G19110	0	3	1	11	13	33	-0.0113737	3.1914	0.00235733	Eukaryotic aspartyl protease family protein
AT5G50720.1	AT5G50720	90	112	84	42	50	83	2.80916	-1.25973	0.00237389	HVA22 homologue E
AT1G37130.1	AT1G37130	438	376	166	600	1194	1062	5.6539	1.04815	0.00237601	nitrate reductase 2
AT1G66360.1	AT1G66360	11	10	6	46	51	28	1.14152	1.66333	0.00238558	Calcium-dependent lipid-binding (CaLB domain) family protein
AT2G07671.1	AT2G07671	154	217	119	111	116	137	3.66595	-0.967029	0.00239336	ATP synthase subunit C family protein
AT3G61880.1	AT3G61880	67	86	96	30	54	56	2.58995	-1.41421	0.0023995	cytochrome p450 78a9
AT3G09770.1	AT3G09770	923	824	741	730	833	828	6.15311	-0.609191	0.00240164	RING/U-box superfamily protein
AT2G28930.2	AT2G28930	493	404	325	399	388	359	5.10525	-0.63156	0.00241177	protein kinase 1B
AT5G48180.1	AT5G48180	1286	1017	845	2851	2374	1989	7.11744	0.655605	0.00241446	nitrile specifier protein 5
AT4G24630.1	AT4G24630	558	504	252	338	353	395	5.12284	-0.784147	0.00244787	DHHC-type zinc finger family protein
AT3G21700.1	AT3G21700	263	698	224	163	195	304	4.80205	-1.3654	0.00246821	Ras-related small GTP-binding family protein
AT3G57530.1	AT3G57530	379	466	235	552	1348	1782	5.95902	1.24969	0.00246987	calcium-dependent protein kinase 32
AT5G15950.2	AT5G15950	306	450	507	1276	1082	1284	6.03882	0.925131	0.0025277	Adenosylmethionine decarboxylase family protein
AT5G46200.1	AT5G46200	5	3	0	13	27	20	0.119715	2.35088	0.0025277	Protein of Unknown Function (DUF239)
AT1G27370.1	AT1G27370	1372	943	1041	1156	962	982	6.56157	-0.66925	0.00253127	squamosa promoter binding protein-like 10
AT4G33300.2	AT4G33300	347	323	247	565	794	845	5.39198	0.725322	0.00255769	ADR1-like 1
AT2G18230.1	AT2G18230	2933	2804	2350	2448	2936	2390	7.85206	-0.607992	0.00257126	pyrophosphorylase 2
AT2G44460.1	AT2G44460	92	90	15	426	235	191	3.76667	1.63719	0.00257182	beta glucosidase 28
AT3G61880.2	AT3G61880	54	75	87	29	50	40	2.3803	-1.45055	0.00257561	cytochrome p450 78a9
AT5G61430.1	AT5G61430	53	63	58	19	36	41	2.06041	-1.41841	0.00257822	NAC domain containing protein 100
AT1G05620.2	AT1G05620	165	161	143	453	404	320	4.47532	0.770338	0.00264413	uridine-ribohydrolase 2
AT1G66960.1	AT1G66960	44	45	30	147	163	90	2.81838	1.20665	0.00265497	Terpenoid cyclases family protein
AT4G37730.1	AT4G37730	73	186	111	67	78	70	3.16325	-1.35134	0.00267372	basic leucine-zipper 7
AT5G52570.1	AT5G52570	8	3	8	32	27	61	1.02199	2.08089	0.00268144	beta-carotene hydroxylase 2
AT1G64060.1	AT1G64060	85	98	80	299	198	242	3.75985	0.931068	0.00269162	respiratory burst oxidase protein F
AT1G71710.1	AT1G71710	557	482	499	545	436	440	5.44241	-0.678053	0.00269255	DNAse I-like superfamily protein
AT1G07200.2	AT1G07200	1134	1062	1066	908	1081	1077	6.53896	-0.653967	0.00270914	Double Clp-N motif-containing P-loop nucleoside triphosphate hydrolases superfamily protein
AT1G18730.3	AT1G18730	703	597	432	589	554	494	5.60824	-0.614695	0.00273009	NDH dependent flow 6
AT5G38760.1	AT5G38760	35	163	22	9	19	26	2.10077	-2.51593	0.0027319	Late embryogenesis abundant protein (LEA) family protein
AT5G15948.1	AT5G15948	317	471	528	1332	1126	1323	6.0944	0.91958	0.00276954	conserved peptide upstream open reading frame 10
AT3G24080.2	AT3G24080	2086	2552	1363	1883	1652	1884	7.37266	-0.677116	0.00277276	KRR1 family protein
AT3G22850.1	AT3G22850	504	500	362	1048	1148	872	5.90133	0.625141	0.00281376	Aluminium induced protein with YGL and LRDR motifs
AT3G52080.1	AT3G52080	8	33	7	0	3	5	-0.0274616	-3.03685	0.00282217	cation/hydrogen exchanger 28
AT5G62210.1	AT5G62210	299	91	199	1343	684	437	5.30137	1.50373	0.00284246	Embryo-specific protein 3, (ATS3)
AT5G45960.1	AT5G45960	202	100	163	598	448	353	4.63507	1.02228	0.00284617	GDSL-like Lipase/Acylhydrolase superfamily protein
AT3G04210.1	AT3G04210	43	26	4	72	110	277	2.81059	2.19919	0.00285285	Disease resistance protein (TIR-NBS class)
AT2G21655.1	AT2G21655	15	9	15	34	70	118	1.8595	1.93856	0.00285455	Protein of unknown function (DUF784)
AT1G78110.1	AT1G78110	714	1024	690	615	835	677	6.06814	-0.745763	0.00285762	unknown protein
AT4G21850.2	AT4G21850	16	27	7	48	88	94	1.95437	1.68147	0.00285762	methionine sulfoxide reductase B9
AT1G02070.1	AT1G02070	89	109	83	48	66	75	2.8284	-1.12404	0.00288019	unknown protein
AT2G07677.1	AT2G07677	35	56	16	16	7	18	1.21788	-1.88461	0.00290035	pseudogene
AT3G04000.1	AT3G04000	18	9	13	47	50	72	1.56935	1.52557	0.00290035	NAD(P)-binding Rossmann-fold superfamily protein
AT3G46130.4	AT3G46130	6	6	0	28	21	23	0.37798	2.04099	0.00290035	myb domain protein 48
AT4G01480.1	AT4G01480	482	522	351	1096	1204	840	5.91686	0.670683	0.00290035	pyrophosphorylase 5
AT2G38760.1	AT2G38760	86	51	42	204	183	148	3.26763	1.05184	0.00290047	annexin 3
AT2G18050.1	AT2G18050	35	64	99	450	117	679	4.22686	2.01244	0.00290458	histone H1-3
AT3G59220.1	AT3G59220	15	16	14	84	58	44	1.70256	1.48488	0.00290458	pirin
AT2G33570.1	AT2G33570	304	250	224	570	592	592	5.1001	0.626181	0.00294192	Domain of unknown function (DUF23)
AT1G08000.1	AT1G08000	361	379	282	318	326	312	4.85176	-0.642799	0.00297058	GATA transcription factor 10
AT1G14880.1	AT1G14880	0	0	0	6	3	12	-1.13743	5.59271	0.00298228	PLANT CADMIUM RESISTANCE 1
AT1G73540.1	AT1G73540	184	195	115	260	620	681	4.76494	1.13477	0.00301	nudix hydrolase homolog 21
AT1G64405.1	AT1G64405	383	295	250	304	291	212	4.66628	-0.741506	0.00301067	unknown protein
AT3G24080.1	AT3G24080	2127	2599	1393	1926	1691	1929	7.40293	-0.671971	0.00302134	KRR1 family protein
AT4G02330.1	AT4G02330	29	44	22	117	82	139	2.56484	1.28907	0.00303354	Plant invertase/pectin methylesterase inhibitor superfamily
AT4G38960.2	AT4G38960	140	137	204	114	119	105	3.64655	-1.10988	0.00305741	B-box type zinc finger family protein
AT1G08200.1	AT1G08200	2018	1906	1570	4296	3827	3810	7.87787	0.568913	0.00306194	UDP-D-apiose/UDP-D-xylose synthase 2
AT2G37870.1	AT2G37870	4	4	3	69	11	28	0.807165	2.70879	0.00307156	Bifunctional inhibitor/lipid-transfer protein/seed storage 2S albumin superfamily protein
AT4G34050.2	AT4G34050	1130	1055	1000	1184	922	916	6.50533	-0.638126	0.00307156	S-adenosyl-L-methionine-dependent methyltransferases superfamily protein
AT1G20330.1	AT1G20330	1215	972	832	2434	2166	2020	7.02049	0.589764	0.00308263	sterol methyltransferase 2
AT2G46600.1	AT2G46600	694	696	464	986	1887	2370	6.55275	0.969297	0.00309648	Calcium-binding EF-hand family protein
ATCG00070.1	ATCG00070	52	54	32	14	23	35	1.6946	-1.46159	0.00310298	photosystem II reaction center protein K precursor
AT5G04720.1	AT5G04720	349	411	237	604	910	999	5.55251	0.802515	0.00310972	ADR1-like 2
AT5G05170.1	AT5G05170	2286	1924	1804	4848	4412	4045	8.02555	0.591385	0.00311755	Cellulose synthase family protein
AT1G72900.1	AT1G72900	33	31	21	49	145	241	2.80024	1.82457	0.00312605	Toll-Interleukin-Resistance (TIR) domain-containing protein
AT3G46613.1	AT3G46613	0	0	0	10	7	3	-1.18185	5.51958	0.00313115	ROTUNDIFOLIA like 4
AT5G04590.1	AT5G04590	2425	1747	1495	4103	4352	4003	7.92769	0.601827	0.00313271	sulfite reductase
AT5G14000.1	AT5G14000	224	241	152	135	186	180	4.04169	-0.834475	0.00315131	NAC domain containing protein 84
AT5G23940.1	AT5G23940	1957	1541	1476	4122	3453	3507	7.75691	0.604	0.00316042	HXXXD-type acyl-transferase family protein
AT4G39350.1	AT4G39350	816	715	586	1472	1608	1508	6.50143	0.572205	0.00316328	cellulose synthase A2
AT1G04610.1	AT1G04610	93	69	110	62	58	54	2.77301	-1.2307	0.00320008	YUCCA 3
AT5G25390.2	AT5G25390	195	92	161	438	505	375	4.56324	0.99056	0.00320008	Integrase-type DNA-binding superfamily protein
AT5G25390.1	AT5G25390	177	88	146	399	457	334	4.42482	0.968767	0.00320484	Integrase-type DNA-binding superfamily protein
AT1G32910.1	AT1G32910	19	22	8	56	57	73	1.72539	1.39615	0.0032155	HXXXD-type acyl-transferase family protein
AT1G14480.1	AT1G14480	45	65	34	98	192	256	3.21046	1.38759	0.00323162	Ankyrin repeat family protein
AT1G28610.2	AT1G28610	40	23	18	87	103	83	2.28752	1.22519	0.00324494	GDSL-like Lipase/Acylhydrolase superfamily protein
AT1G54575.1	AT1G54575	654	804	519	1239	1584	2217	6.54983	0.808638	0.00324494	unknown protein
AT1G63710.1	AT1G63710	48	39	44	261	139	103	3.09006	1.37081	0.00324494	cytochrome P450, family 86, subfamily A, polypeptide 7
AT4G38960.3	AT4G38960	149	150	218	126	132	114	3.76211	-1.07554	0.00326724	B-box type zinc finger family protein
AT5G12330.1	AT5G12330	334	454	249	221	336	287	4.79129	-0.832475	0.00327109	Lateral root primordium (LRP) protein-related
AT1G54010.1	AT1G54010	8	5	12	32	40	103	1.499	2.20951	0.00330817	GDSL-like Lipase/Acylhydrolase superfamily protein
AT3G09780.1	AT3G09780	80	60	36	19	38	37	2.03873	-1.41341	0.0033191	CRINKLY4 related 1
AT1G09932.1	AT1G09932	1	0	0	8	5	12	-0.936538	3.74833	0.00332359	Phosphoglycerate mutase family protein
AT1G09932.2	AT1G09932	1	0	0	8	5	12	-0.936538	3.74832	0.00332359	Phosphoglycerate mutase family protein
AT3G21700.2	AT3G21700	222	607	194	139	167	263	4.58862	-1.37239	0.00332359	Ras-related small GTP-binding family protein
AT5G45800.1	AT5G45800	410	411	224	273	268	346	4.8147	-0.757404	0.00332771	Leucine-rich repeat protein kinase family protein
AT1G28310.2	AT1G28310	127	101	95	60	80	91	3.05396	-1.02861	0.00332781	Dof-type zinc finger DNA-binding family protein
AT4G36500.1	AT4G36500	34	20	19	58	101	137	2.33884	1.48673	0.00334889	unknown protein
AT5G54490.1	AT5G54490	1	5	0	7	29	50	0.484488	3.2678	0.00340971	pinoid-binding protein 1
AT3G52430.1	AT3G52430	177	214	154	132	167	148	3.8775	-0.835784	0.00347992	alpha/beta-Hydrolases superfamily protein
AT1G16850.1	AT1G16850	27	30	16	125	56	103	2.29131	1.42173	0.00348274	unknown protein
AT3G14870.1	AT3G14870	248	212	161	441	482	493	4.78403	0.652089	0.00348581	Plant protein of unknown function (DUF641)
AT1G05620.1	AT1G05620	182	166	160	496	439	338	4.5887	0.765332	0.00350007	uridine-ribohydrolase 2
AT4G30280.1	AT4G30280	3	1	2	6	23	79	0.75257	3.56815	0.00352305	xyloglucan endotransglucosylase/hydrolase 18
AT5G63180.1	AT5G63180	219	213	167	483	549	393	4.77331	0.703397	0.00353119	Pectin lyase-like superfamily protein
AT5G22250.1	AT5G22250	40	39	23	77	142	137	2.64355	1.27367	0.00354392	Polynucleotidyl transferase, ribonuclease H-like superfamily protein
AT4G08290.2	AT4G08290	197	314	268	190	180	239	4.38319	-0.933822	0.00359452	nodulin MtN21 /EamA-like transporter family protein
AT3G14870.3	AT3G14870	249	211	160	440	479	493	4.78042	0.650889	0.00360717	Plant protein of unknown function (DUF641)
AT3G23000.1	AT3G23000	881	932	932	719	913	898	6.28368	-0.689097	0.00361978	CBL-interacting protein kinase 7
AT5G15950.1	AT5G15950	330	485	554	1396	1161	1345	6.14388	0.906525	0.00361978	Adenosylmethionine decarboxylase family protein
AT1G24470.1	AT1G24470	73	23	46	211	191	130	3.17564	1.35546	0.00371264	beta-ketoacyl reductase 2
AT5G46800.1	AT5G46800	426	396	255	846	726	809	5.54128	0.61372	0.00372886	Mitochondrial substrate carrier family protein
AT5G54720.1	AT5G54720	1	1	1	7	14	16	-0.488985	2.95895	0.00373979	Ankyrin repeat family protein
AT4G01060.2	AT4G01060	19	11	17	57	50	123	1.94384	1.72619	0.00375497	CAPRICE-like MYB3
AT5G32460.1	AT5G32460	2	1	3	11	16	25	-0.0652847	2.50134	0.00379061	Transcriptional factor B3 family protein
AT1G14330.1	AT1G14330	238	263	219	476	624	623	5.04748	0.702863	0.00380345	Galactose oxidase/kelch repeat superfamily protein
AT3G47540.2	AT3G47540	11	15	13	48	48	56	1.4544	1.39931	0.00382621	Chitinase family protein
AT1G10650.2	AT1G10650	544	491	385	447	487	431	5.33834	-0.59901	0.00387057	SBP (S-ribonuclease binding protein) family protein
AT5G12330.2	AT5G12330	322	446	245	218	326	286	4.76175	-0.823871	0.00389983	Lateral root primordium (LRP) protein-related
AT1G76960.1	AT1G76960	3	3	3	17	18	25	0.142407	2.15265	0.00390809	unknown protein
AT3G50530.1	AT3G50530	1276	1107	927	1163	1133	907	6.56309	-0.593587	0.00391416	CDPK-related kinase
AT1G35910.1	AT1G35910	68	60	43	129	197	176	3.19204	1.01828	0.00395893	Haloacid dehalogenase-like hydrolase (HAD) superfamily protein
AT1G18730.1	AT1G18730	739	615	453	629	577	523	5.67643	-0.597169	0.00396673	NDH dependent flow 6
AT1G31770.1	AT1G31770	2427	2008	1448	1928	2043	1594	7.37022	-0.610449	0.00400988	ATP-binding cassette 14
AT5G07110.1	AT5G07110	35	38	32	100	106	119	2.56892	1.0755	0.00401689	prenylated RAB acceptor 1.B6
AT5G23850.1	AT5G23850	174	160	155	367	400	410	4.4998	0.709685	0.0040377	Arabidopsis thaliana protein of unknown function (DUF821)
AT3G50530.2	AT3G50530	1220	1075	879	1114	1090	876	6.50363	-0.588495	0.00407333	CDPK-related kinase
AT2G47780.1	AT2G47780	5	6	14	48	35	51	1.20564	1.81166	0.00415454	Rubber elongation factor protein (REF)
AT2G18050.2	AT2G18050	30	61	92	399	109	624	4.09649	1.98613	0.0041707	histone H1-3
AT1G76600.1	AT1G76600	23	14	11	33	85	148	2.10463	1.94678	0.00417352	unknown protein
AT5G05440.1	AT5G05440	27	17	11	51	78	75	1.858	1.36611	0.00417651	Polyketide cyclase/dehydrase and lipid transport superfamily protein
AT4G12910.1	AT4G12910	222	135	163	434	482	391	4.62336	0.778074	0.00417827	serine carboxypeptidase-like 20
AT5G17090.1	AT5G17090	30	51	40	131	147	122	2.83356	1.15559	0.00418471	Cystatin/monellin superfamily protein
AT2G30930.1	AT2G30930	78	37	22	149	118	247	3.11764	1.41522	0.00423267	unknown protein
AT5G14440.2	AT5G14440	725	962	472	629	581	691	5.88396	-0.711608	0.00423616	Surfeit locus protein 2 (SURF2)
AT2G29750.1	AT2G29750	64	53	72	187	218	171	3.37945	1.03127	0.00423845	UDP-glucosyl transferase 71C1
AT5G05270.2	AT5G05270	371	227	255	1075	691	548	5.39683	0.888535	0.00424831	Chalcone-flavanone isomerase family protein
AT5G26670.2	AT5G26670	371	283	304	885	715	658	5.44023	0.677955	0.00430499	Pectinacetylesterase family protein
AT2G37760.1	AT2G37760	168	163	108	318	346	380	4.32624	0.714904	0.00431444	NAD(P)-linked oxidoreductase superfamily protein
AT2G37760.3	AT2G37760	147	132	90	279	296	319	4.09523	0.743031	0.00431904	NAD(P)-linked oxidoreductase superfamily protein
AT4G12400.1	AT4G12400	97	398	46	71	57	64	3.48633	-1.98795	0.00435404	stress-inducible protein, putative
AT3G48580.2	AT3G48580	82	33	63	145	220	275	3.45676	1.28832	0.00438387	xyloglucan endotransglucosylase/hydrolase 11
AT1G44790.1	AT1G44790	479	391	269	783	850	872	5.61672	0.610357	0.00440196	ChaC-like family protein
ATCG00820.1	ATCG00820	940	1322	810	825	771	1105	6.40401	-0.732065	0.00440867	ribosomal protein S19
AT1G18740.1	AT1G18740	134	204	93	277	492	476	4.48197	1.00214	0.00444222	Protein of unknown function (DUF793)
AT3G45680.1	AT3G45680	52	25	54	151	163	147	3.00911	1.23454	0.00446974	Major facilitator superfamily protein
AT1G17840.1	AT1G17840	1575	1164	1298	3398	2952	2893	7.48386	0.63414	0.00448683	white-brown complex homolog protein 11
AT3G22290.1	AT3G22290	653	637	520	1299	1388	1232	6.27763	0.564446	0.00449472	Endoplasmic reticulum vesicle transporter protein
AT2G17730.1	AT2G17730	456	391	420	1005	975	908	5.81567	0.623552	0.00453981	NEP-interacting protein 2
AT3G55690.1	AT3G55690	170	132	104	95	104	118	3.4186	-0.889682	0.00459658	unknown protein
AT5G19100.1	AT5G19100	3	2	3	17	18	20	0.033288	2.19083	0.00461056	Eukaryotic aspartyl protease family protein
AT3G60955.1	AT3G60955	4	0	2	24	15	12	-0.0892967	2.48469	0.00462357	CYP76C8P (cytochrome P450
AT4G09500.1	AT4G09500	172	150	137	325	367	419	4.41219	0.725307	0.00463471	UDP-Glycosyltransferase superfamily protein
AT5G17880.1	AT5G17880	209	147	141	130	131	146	3.73875	-0.829802	0.00463471	disease resistance protein (TIR-NBS-LRR class)
AT5G05270.1	AT5G05270	386	232	267	1116	718	568	5.45032	0.888402	0.00466289	Chalcone-flavanone isomerase family protein
AT4G25620.1	AT4G25620	379	335	284	600	844	911	5.49877	0.694023	0.00473539	hydroxyproline-rich glycoprotein family protein
AT3G61060.1	AT3G61060	168	124	88	77	105	97	3.28645	-0.967667	0.00477661	phloem protein 2-A13
AT2G26250.1	AT2G26250	1763	1388	1421	3408	3189	3539	7.63435	0.592209	0.00479276	3-ketoacyl-CoA synthase 10
ATCG01130.1	ATCG01130	20255	31856	15375	14028	18300	22161	10.8081	-0.840588	0.00480917	Ycf1 protein
AT5G40850.2	AT5G40850	283	206	175	525	537	455	4.8802	0.655095	0.00482921	urophorphyrin methylase 1
AT1G72290.1	AT1G72290	403	55	331	1738	977	1256	5.93002	1.74483	0.00483385	Kunitz family trypsin and protease inhibitor protein
AT1G74380.1	AT1G74380	612	549	436	1167	1162	1082	6.08273	0.551531	0.00484149	xyloglucan xylosyltransferase 5
AT3G30580.1	AT3G30580	1	1	2	10	14	18	-0.332958	2.75026	0.00484149	unknown protein
AT3G47500.1	AT3G47500	277	271	478	189	268	275	4.7613	-1.1065	0.00484149	cycling DOF factor 3
AT1G05100.1	AT1G05100	114	126	112	111	63	80	3.18783	-1.03483	0.00484761	mitogen-activated protein kinase kinase kinase 18
AT4G29020.2	AT4G29020	201	119	138	385	336	441	4.44937	0.796724	0.00491333	glycine-rich protein
AT1G10650.1	AT1G10650	561	505	395	468	506	447	5.38595	-0.581795	0.00492773	SBP (S-ribonuclease binding protein) family protein
AT1G17020.1	AT1G17020	52	24	31	15	11	25	1.30667	-1.59818	0.00493558	senescence-related gene 1
AT4G33300.1	AT4G33300	365	349	264	583	822	901	5.46743	0.697151	0.00495816	ADR1-like 1
AT3G23450.1	AT3G23450	1781	1183	1314	1316	1233	1468	6.92038	-0.64224	0.00502526	unknown protein
AT2G19000.1	AT2G19000	26	104	6	5	4	15	1.34534	-2.9562	0.00502834	unknown protein
AT5G15265.1	AT5G15265	14	28	27	7	12	10	0.682396	-1.8207	0.00504997	unknown protein
AT3G57070.1	AT3G57070	157	131	108	275	324	370	4.20842	0.750434	0.00505232	Glutaredoxin family protein
AT2G19650.1	AT2G19650	139	140	113	100	110	108	3.39757	-0.850461	0.00508225	Cysteine/Histidine-rich C1 domain family protein
AT3G12750.1	AT3G12750	779	766	543	1368	1537	1591	6.47448	0.568012	0.00509334	zinc transporter 1 precursor
AT5G26670.1	AT5G26670	400	294	321	935	752	692	5.51771	0.670737	0.00509976	Pectinacetylesterase family protein
AT4G33540.1	AT4G33540	315	277	224	601	627	564	5.14358	0.591503	0.00510548	metallo-beta-lactamase family protein
AT4G15200.2	AT4G15200	29	81	23	110	200	262	3.22968	1.57977	0.0051106	formin 3
AT5G48610.1	AT5G48610	429	842	340	294	388	479	5.36166	-1.00218	0.0051106	unknown protein
AT1G21590.1	AT1G21590	976	823	882	907	896	789	6.2708	-0.613896	0.00512155	Protein kinase protein with adenine nucleotide alpha hydrolases-like domain
AT2G32340.1	AT2G32340	56	65	41	31	41	33	2.02034	-1.16243	0.00512155	TraB family protein
AT3G22142.1	AT3G22142	30	21	14	12	11	7	0.618171	-1.62766	0.00512155	Bifunctional inhibitor/lipid-transfer protein/seed storage 2S albumin superfamily protein
AT5G52900.1	AT5G52900	27	55	22	10	14	22	1.23929	-1.70091	0.00512155	unknown protein
AT5G62750.1	AT5G62750	187	702	117	37	79	199	4.35437	-2.17079	0.00512155	unknown protein
AT2G37760.2	AT2G37760	164	162	109	314	340	377	4.3109	0.708264	0.00512684	NAD(P)-linked oxidoreductase superfamily protein
AT3G28770.1	AT3G28770	75	226	19	14	13	49	2.61662	-2.54081	0.00512684	Protein of unknown function (DUF1216)
AT4G01410.1	AT4G01410	266	198	205	545	621	439	4.94104	0.70988	0.00513337	Late embryogenesis abundant (LEA) hydroxyproline-rich glycoprotein family
AT2G47750.1	AT2G47750	369	345	278	325	334	280	4.81524	-0.625741	0.00513872	putative indole-3-acetic acid-amido synthetase GH3.9
AT1G24735.2	AT1G24735	13	23	9	61	48	64	1.6262	1.40023	0.00518496	S-adenosyl-L-methionine-dependent methyltransferases superfamily protein
AT2G24570.1	AT2G24570	355	435	327	288	362	367	4.97058	-0.689511	0.00522687	WRKY DNA-binding protein 17
AT4G12400.2	AT4G12400	100	423	46	72	64	66	3.55847	-1.98592	0.00525614	stress-inducible protein, putative
AT5G40780.1	AT5G40780	142	207	114	285	494	522	4.56091	0.95218	0.00527388	lysine histidine transporter 1
AT5G09440.1	AT5G09440	257	263	194	397	664	895	5.15666	0.913404	0.00528029	EXORDIUM like 4
AT3G61060.2	AT3G61060	160	115	86	73	101	91	3.21408	-0.969936	0.00533135	phloem protein 2-A13
AT5G55660.1	AT5G55660	3606	5739	2733	3414	3275	3723	8.35945	-0.748239	0.00534216	DEK domain-containing chromatin associated protein
ATMG01080.1	ATMG01080	170	231	110	111	127	146	3.726	-0.93909	0.00536549	mitochondrial F0-ATPase subunit 9
AT3G46130.3	AT3G46130	7	6	0	28	21	23	0.393586	1.93227	0.00537168	myb domain protein 48
AT3G56170.1	AT3G56170	43	38	42	117	173	109	2.83669	1.13419	0.00538427	Ca-2+ dependent nuclease
AT3G23430.1	AT3G23430	257	225	182	212	178	207	4.20628	-0.696473	0.00540746	phosphate 1
AT3G15510.1	AT3G15510	16	11	8	36	62	45	1.35434	1.49204	0.00545128	NAC domain containing protein 2
AT1G70985.1	AT1G70985	123	103	61	56	83	50	2.82877	-1.11998	0.00547067	hydroxyproline-rich glycoprotein family protein
AT4G30450.1	AT4G30450	112	85	114	343	252	266	3.98825	0.894464	0.0054835	glycine-rich protein
AT5G38980.1	AT5G38980	1561	1212	857	1127	1151	1193	6.67727	-0.588701	0.0054835	unknown protein
AT5G10625.1	AT5G10625	5	2	1	17	10	77	0.730422	3.15275	0.00548557	unknown protein
AT5G61340.1	AT5G61340	76	67	58	44	49	49	2.37079	-1.046	0.00550691	unknown protein
AT3G60550.1	AT3G60550	1	3	1	8	19	22	-0.150856	2.68123	0.00554043	cyclin p3;2
AT1G28610.1	AT1G28610	41	23	19	89	105	80	2.30051	1.19415	0.00555543	GDSL-like Lipase/Acylhydrolase superfamily protein
AT1G14480.2	AT1G14480	40	57	25	80	171	216	2.98717	1.41149	0.00556743	Ankyrin repeat family protein
AT5G62070.1	AT5G62070	503	525	433	465	473	490	5.39668	-0.587058	0.00556743	IQ-domain 23
AT2G37460.1	AT2G37460	694	638	513	1130	1602	1402	6.33414	0.620394	0.00559619	nodulin MtN21 /EamA-like transporter family protein
AT1G50460.1	AT1G50460	284	239	167	551	449	567	4.92765	0.651835	0.00560114	hexokinase-like 1
AT4G18020.5	AT4G18020	1034	841	864	918	960	774	6.29879	-0.605544	0.0056078	CheY-like two-component responsive regulator family protein
AT4G38650.1	AT4G38650	110	165	94	94	100	71	3.24429	-1.02248	0.00561989	Glycosyl hydrolase family 10 protein
AT5G15310.2	AT5G15310	68	45	78	204	174	230	3.43855	1.08617	0.00564171	myb domain protein 16
AT4G22050.1	AT4G22050	167	87	114	298	362	315	4.17902	0.858539	0.00566781	Eukaryotic aspartyl protease family protein
AT3G63160.1	AT3G63160	766	489	414	1456	953	1861	6.30098	0.829532	0.00571771	unknown protein
AT2G34310.3	AT2G34310	248	204	206	481	502	527	4.87991	0.643244	0.00572422	unknown protein
AT1G24575.1	AT1G24575	1600	1597	1192	2773	3443	3355	7.5572	0.581897	0.00574159	unknown protein
AT5G65920.1	AT5G65920	213	159	145	359	417	446	4.55695	0.69944	0.00574679	ARM repeat superfamily protein
AT5G40780.2	AT5G40780	141	207	115	284	491	518	4.55533	0.94235	0.00575713	lysine histidine transporter 1
AT1G06920.1	AT1G06920	131	143	129	117	110	97	3.43902	-0.877191	0.00576675	ovate family protein 4
AT3G10190.1	AT3G10190	260	262	209	431	641	727	5.09206	0.752383	0.00581166	Calcium-binding EF-hand family protein
AT3G23790.1	AT3G23790	449	508	329	381	443	392	5.18517	-0.620604	0.0058124	AMP-dependent synthetase and ligase family protein
AT1G03230.1	AT1G03230	147	192	104	103	106	130	3.53404	-0.919964	0.00581328	Eukaryotic aspartyl protease family protein
AT3G14380.1	AT3G14380	95	175	161	71	114	99	3.45286	-1.19097	0.00582402	Uncharacterised protein family (UPF0497)
AT4G18020.4	AT4G18020	1044	845	870	923	972	773	6.30848	-0.607254	0.00586794	CheY-like two-component responsive regulator family protein
AT1G28370.1	AT1G28370	7	12	4	18	58	59	1.188	2.01536	0.00602408	ERF domain protein 11
AT2G07692.1	AT2G07692	8	9	7	3	0	3	-0.743774	-2.46404	0.00602408	unknown protein
AT1G53490.1	AT1G53490	821	901	610	265	262	854	5.81282	-1.29188	0.00604247	RING/U-box superfamily protein
AT5G14440.1	AT5G14440	733	967	465	627	587	705	5.89066	-0.700166	0.00604247	Surfeit locus protein 2 (SURF2)
AT2G39518.1	AT2G39518	4	7	5	0	0	2	-1.23409	-3.29066	0.00604321	Uncharacterised protein family (UPF0497)
AT1G71692.1	AT1G71692	9	17	9	28	71	71	1.53949	1.72806	0.00605113	AGAMOUS-like 12
AT2G38740.1	AT2G38740	366	305	353	867	831	710	5.53907	0.663602	0.0060928	Haloacid dehalogenase-like hydrolase (HAD) superfamily protein
AT4G09500.2	AT4G09500	189	161	151	346	397	455	4.52639	0.707124	0.00610482	UDP-Glycosyltransferase superfamily protein
AT3G50440.1	AT3G50440	284	178	262	786	573	546	5.14377	0.821459	0.00613474	methyl esterase 10
AT3G50770.1	AT3G50770	13	19	14	24	73	303	2.571	2.56118	0.00613474	calmodulin-like 41
AT5G24160.1	AT5G24160	5	4	1	17	13	66	0.664487	2.72229	0.00615447	squalene monoxygenase 6
AT1G10010.1	AT1G10010	15	9	8	30	51	52	1.25468	1.51401	0.00621284	amino acid permease 8
AT2G07779.1	AT2G07779	17	19	13	7	6	9	0.250378	-1.67912	0.00622214	unknown protein
AT5G13930.1	AT5G13930	2079	791	1399	6453	3871	3097	7.8542	1.09522	0.00624399	Chalcone and stilbene synthase family protein
AT3G46300.1	AT3G46300	5	8	11	0	0	4	-0.805354	-3.03968	0.00628698	unknown protein
AT3G24715.1	AT3G24715	91	318	43	52	50	73	3.25658	-1.86173	0.00629277	Protein kinase superfamily protein with octicosapeptide/Phox/Bem1p domain
AT5G19060.1	AT5G19060	175	103	157	110	110	105	3.51392	-0.989098	0.00629486	unknown protein
AT4G26630.2	AT4G26630	6459	10363	4612	5494	6309	6326	9.1741	-0.770354	0.00630655	DEK domain-containing chromatin associated protein
AT2G43520.1	AT2G43520	53	23	21	108	100	110	2.50579	1.19323	0.00634031	trypsin inhibitor protein 2
AT4G08290.1	AT4G08290	207	354	301	209	207	268	4.53889	-0.91574	0.00634031	nodulin MtN21 /EamA-like transporter family protein
AT5G59730.1	AT5G59730	598	455	495	929	1383	1440	6.1575	0.721141	0.0063521	exocyst subunit exo70 family protein H7
AT5G63550.2	AT5G63550	902	1174	622	910	750	823	6.23211	-0.65342	0.00635555	DEK domain-containing chromatin associated protein
AT5G40850.1	AT5G40850	324	232	186	581	587	499	5.02207	0.635949	0.00640341	urophorphyrin methylase 1
AT3G17600.1	AT3G17600	8	9	8	35	41	31	0.96428	1.53524	0.00640634	indole-3-acetic acid inducible 31
AT1G70270.1	AT1G70270	123	117	115	411	410	203	4.21088	0.9629	0.00643553	unknown protein
AT1G67300.2	AT1G67300	428	401	316	851	776	820	5.60616	0.550379	0.0064467	Major facilitator superfamily protein
AT2G41630.1	AT2G41630	793	772	616	736	696	755	5.9849	-0.544103	0.00645485	transcription factor IIB
AT4G34770.1	AT4G34770	38	26	23	16	19	12	1.0747	-1.41732	0.00649147	SAUR-like auxin-responsive protein family
AT3G14040.1	AT3G14040	1635	6507	818	363	647	1760	7.50215	-2.18066	0.00655053	Pectin lyase-like superfamily protein
AT2G24160.1	AT2G24160	129	135	108	83	70	122	3.27474	-0.985347	0.00655865	pseudogene
AT3G10450.1	AT3G10450	467	399	239	325	341	337	4.93068	-0.659281	0.00659992	serine carboxypeptidase-like 7
AT1G14390.1	AT1G14390	7	8	5	27	33	28	0.7043	1.58116	0.00661222	Leucine-rich repeat protein kinase family protein
AT1G57775.1	AT1G57775	25	10	11	30	100	112	1.98924	1.87365	0.00668089	Protein of unknown function (DUF784)
AT1G52827.1	AT1G52827	89	52	77	194	220	212	3.51937	0.958802	0.00669604	cadmium tolerance 1
AT1G70130.1	AT1G70130	0	2	0	8	21	7	-0.547088	3.44575	0.00671946	Concanavalin A-like lectin protein kinase family protein
AT4G02075.1	AT4G02075	115	133	115	79	104	98	3.26962	-0.929333	0.00671946	RING/FYVE/PHD zinc finger superfamily protein
AT4G23690.1	AT4G23690	321	266	300	204	224	321	4.60362	-0.808509	0.00673439	Disease resistance-responsive (dirigent-like protein) family protein
AT5G27870.1	AT5G27870	224	914	123	36	99	231	4.65663	-2.2732	0.00676242	Plant invertase/pectin methylesterase inhibitor superfamily
AT1G49450.1	AT1G49450	229	180	225	512	484	545	4.88351	0.710866	0.00676691	Transducin/WD40 repeat-like superfamily protein
AT4G26630.1	AT4G26630	6533	10422	4651	5574	6389	6415	9.1886	-0.762135	0.00679853	DEK domain-containing chromatin associated protein
AT5G11360.3	AT5G11360	30	38	18	82	83	128	2.38324	1.23645	0.00679853	Interleukin-1 receptor-associated kinase 4 protein
AT5G54560.1	AT5G54560	9	24	8	0	4	6	-0.144926	-2.51607	0.00679853	Protein of unknown function (DUF295)
AT2G46100.1	AT2G46100	143	145	121	293	306	431	4.28482	0.781131	0.00683607	Nuclear transport factor 2 (NTF2) family protein
AT1G10560.1	AT1G10560	8	12	9	27	50	56	1.23095	1.63586	0.00687363	plant U-box 18
AT5G52750.1	AT5G52750	1	2	0	6	12	20	-0.463158	3.01176	0.00691143	Heavy metal transport/detoxification superfamily protein
AT2G38400.2	AT2G38400	315	528	286	283	279	372	4.92755	-0.81884	0.00695163	alanine:glyoxylate aminotransferase 3
AT5G61270.1	AT5G61270	3	4	1	11	16	38	0.206657	2.4548	0.00697973	phytochrome-interacting factor7
AT5G26660.1	AT5G26660	129	72	96	271	269	250	3.87991	0.857749	0.00698061	myb domain protein 86
AT1G27940.1	AT1G27940	30	35	30	146	105	75	2.53112	1.21429	0.00707776	P-glycoprotein 13
AT1G07200.1	AT1G07200	859	844	788	667	848	875	6.15989	-0.620032	0.00709999	Double Clp-N motif-containing P-loop nucleoside triphosphate hydrolases superfamily protein
AT2G24600.4	AT2G24600	11	11	2	29	30	74	1.17725	1.95876	0.00709999	Ankyrin repeat family protein
AT1G29720.1	AT1G29720	47	28	21	104	84	117	2.46179	1.14223	0.00715241	Leucine-rich repeat transmembrane protein kinase
AT2G35950.1	AT2G35950	9	6	10	25	40	66	1.17867	1.81557	0.00715882	embryo sac development arrest 12
AT5G57670.2	AT5G57670	6	2	6	21	31	23	0.458763	1.84404	0.00718045	Protein kinase superfamily protein
AT5G57785.1	AT5G57785	97	117	100	358	363	188	4.04089	0.96682	0.00719116	unknown protein
AT3G05490.1	AT3G05490	287	324	226	538	624	788	5.23441	0.676152	0.00726542	ralf-like 22
AT1G52342.1	AT1G52342	1	4	0	7	19	23	-0.151839	2.69715	0.00730112	unknown protein
AT1G67290.1	AT1G67290	223	820	114	50	90	236	4.56129	-2.11015	0.00731407	glyoxal oxidase-related protein
AT2G37760.4	AT2G37760	156	142	94	287	304	332	4.15491	0.703189	0.00731407	NAD(P)-linked oxidoreductase superfamily protein
AT1G49160.1	AT1G49160	47	46	31	25	28	27	1.64265	-1.16548	0.00732415	Protein kinase superfamily protein
AT1G12000.1	AT1G12000	2533	2240	1667	2512	1933	1653	7.50453	-0.617899	0.0073242	Phosphofructokinase family protein
AT4G32180.2	AT4G32180	1288	1140	1103	1226	1192	1115	6.68433	-0.558484	0.0073242	pantothenate kinase 2
AT1G74020.1	AT1G74020	3620	2806	2854	3499	2737	1744	7.98932	-0.776567	0.00733113	strictosidine synthase 2
AT1G72940.1	AT1G72940	48	37	42	73	175	282	3.14112	1.50484	0.00738938	Toll-Interleukin-Resistance (TIR) domain-containing protein
AT3G47510.1	AT3G47510	56	61	53	144	160	169	3.1384	0.919473	0.00743068	unknown protein
AT2G20880.1	AT2G20880	4	11	5	0	1	2	-1.00828	-3.10764	0.00743964	Integrase-type DNA-binding superfamily protein
AT5G34882.1	AT5G34882	1	2	3	10	17	21	-0.147091	2.38405	0.00744489	Protein of unknown function (DUF784)
AT2G38170.2	AT2G38170	1493	966	1036	1856	3500	4280	7.44461	0.921261	0.00744884	cation exchanger 1
AT4G29570.1	AT4G29570	1	1	0	6	15	10	-0.69561	3.23634	0.00746444	Cytidine/deoxycytidylate deaminase family protein
AT5G63550.1	AT5G63550	913	1181	633	928	776	835	6.25443	-0.637182	0.00746771	DEK domain-containing chromatin associated protein
AT1G74055.1	AT1G74055	59	95	67	41	61	40	2.46649	-1.19757	0.00751461	unknown protein
AT2G37760.5	AT2G37760	156	142	95	287	305	332	4.15747	0.700452	0.00751461	NAD(P)-linked oxidoreductase superfamily protein
AT5G35200.1	AT5G35200	836	831	673	802	801	764	6.0929	-0.534135	0.00752096	ENTH/ANTH/VHS superfamily protein
AT2G38170.1	AT2G38170	1578	1015	1083	1952	3668	4492	7.51486	0.918864	0.00753561	cation exchanger 1
AT3G25717.1	AT3G25717	142	152	100	89	118	107	3.3894	-0.864487	0.00753561	ROTUNDIFOLIA like 16
AT2G05540.1	AT2G05540	0	0	0	0	8	28	-0.606821	6.36744	0.0075621	Glycine-rich protein family
AT5G08450.1	AT5G08450	1853	2395	1358	1585	1669	1966	7.29687	-0.638853	0.0076118	unknown protein
AT1G70840.1	AT1G70840	2	0	4	18	19	13	-0.105816	2.43433	0.00766799	MLP-like protein 31
AT3G27660.1	AT3G27660	427	402	441	1034	1110	840	5.84881	0.659053	0.00769611	oleosin 4
AT3G10720.1	AT3G10720	109	58	63	239	174	228	3.55638	0.941411	0.00773289	Plant invertase/pectin methylesterase inhibitor superfamily
AT4G15200.1	AT4G15200	27	81	22	107	189	254	3.18036	1.55629	0.00776215	formin 3
AT5G23970.1	AT5G23970	4	2	2	29	6	39	0.34532	2.62798	0.00776215	HXXXD-type acyl-transferase family protein
AT2G38610.1	AT2G38610	251	266	203	489	548	567	4.98002	0.607519	0.00776503	RNA-binding KH domain-containing protein
AT5G60300.2	AT5G60300	156	146	96	313	321	294	4.16752	0.687183	0.00780198	Concanavalin A-like lectin protein kinase family protein
AT5G08450.2	AT5G08450	1858	2403	1363	1590	1679	1974	7.30221	-0.637184	0.0078302	unknown protein
AT5G08450.3	AT5G08450	1850	2395	1356	1586	1672	1963	7.29618	-0.63727	0.0078302	unknown protein
AT4G13263.1	AT4G13263	32	11	16	44	96	130	2.17617	1.66525	0.00786707	Protein of unknown function (DUF784)
AT2G41760.1	AT2G41760	317	348	298	283	302	325	4.78037	-0.640587	0.00788259	unknown protein
AT1G47450.1	AT1G47450	21	6	5	36	47	63	1.34668	1.6792	0.00789265	Protein of unknown function (DUF784)
AT2G30550.1	AT2G30550	48	23	44	124	134	125	2.77017	1.16609	0.00791298	alpha/beta-Hydrolases superfamily protein
AT1G72440.1	AT1G72440	936	1385	644	816	812	966	6.33886	-0.72159	0.00793724	CCAAT-binding factor
AT2G17730.2	AT2G17730	349	299	329	797	756	682	5.44638	0.626944	0.00796352	NEP-interacting protein 2
AT4G18700.1	AT4G18700	766	1894	510	437	473	918	6.2266	-1.30612	0.00798669	CBL-interacting protein kinase 12
AT5G59730.2	AT5G59730	576	428	470	882	1313	1328	6.07418	0.701682	0.00801663	exocyst subunit exo70 family protein H7
AT1G49160.2	AT1G49160	47	46	30	24	28	27	1.62856	-1.17	0.00805306	Protein kinase superfamily protein
AT1G67330.1	AT1G67330	26	16	36	12	13	11	0.882729	-1.69989	0.00806069	Protein of unknown function (DUF579)
AT2G01300.1	AT2G01300	2	1	1	1	33	73	0.716052	4.11874	0.00806098	unknown protein
AT1G05135.1	AT1G05135	70	38	32	34	21	27	1.75859	-1.28934	0.00808348	pseudogene
AT1G21400.1	AT1G21400	89	66	87	208	215	242	3.62678	0.890438	0.00808348	Thiamin diphosphate-binding fold (THDP-binding) superfamily protein
AT1G56110.1	AT1G56110	3839	5514	2197	3440	2706	3440	8.26333	-0.786462	0.00808348	homolog of nucleolar protein NOP56
AT1G71140.1	AT1G71140	13	10	7	29	42	52	1.15587	1.49375	0.00808348	MATE efflux family protein
AT3G60530.1	AT3G60530	234	205	160	374	467	579	4.76953	0.706968	0.00808348	GATA transcription factor 4
AT5G01610.1	AT5G01610	77	159	64	42	56	76	2.84324	-1.31644	0.00808348	Protein of unknown function, DUF538
AT5G14360.1	AT5G14360	21	29	36	104	97	100	2.42264	1.21771	0.00808348	Ubiquitin-like superfamily protein
AT1G47470.1	AT1G47470	14	0	10	30	73	71	1.48121	2.28771	0.00811172	Protein of unknown function (DUF784)
AT3G47540.1	AT3G47540	21	29	22	76	73	85	2.09845	1.1424	0.00812312	Chitinase family protein
AT2G30860.1	AT2G30860	3481	2344	2126	4835	5912	8695	8.51235	0.75839	0.00812467	glutathione S-transferase PHI 9
AT1G19840.1	AT1G19840	111	77	91	81	67	44	2.82854	-1.09795	0.00813297	SAUR-like auxin-responsive protein family
AT4G32180.1	AT4G32180	1337	1187	1137	1278	1236	1170	6.73941	-0.549589	0.00813302	pantothenate kinase 2
AT5G15970.1	AT5G15970	1645	887	2440	4306	5168	9998	8.32487	1.34553	0.00814766	stress-responsive protein (KIN2) / stress-induced protein (KIN2) / cold-responsive protein (COR6.6) / cold-regulated protein (COR6.6)
AT2G30860.2	AT2G30860	1935	1255	1266	2845	3224	4788	7.67687	0.746051	0.00816867	glutathione S-transferase PHI 9
AT5G60300.1	AT5G60300	156	147	96	313	320	294	4.16783	0.682093	0.00820094	Concanavalin A-like lectin protein kinase family protein
AT4G03480.1	AT4G03480	15	4	9	3	3	1	-0.579197	-2.47031	0.00821188	Ankyrin repeat family protein
AT1G09390.1	AT1G09390	468	433	301	373	390	405	5.10025	-0.575739	0.0082211	GDSL-like Lipase/Acylhydrolase superfamily protein
AT5G13640.1	AT5G13640	1319	1103	1173	1094	1282	1144	6.70097	-0.593449	0.0082579	phospholipid:diacylglycerol acyltransferase
AT5G62165.2	AT5G62165	191	183	112	408	358	349	4.43544	0.666767	0.0082579	AGAMOUS-like 42
AT3G17170.1	AT3G17170	855	857	500	662	665	776	5.96088	-0.598	0.00826329	Translation elongation factor EF1B/ribosomal protein S6 family protein
AT1G20920.1	AT1G20920	1698	2482	1326	1496	1671	1832	7.2579	-0.677041	0.00830205	P-loop containing nucleoside triphosphate hydrolases superfamily protein
AT4G30470.1	AT4G30470	299	293	302	734	677	639	5.32216	0.628126	0.00830205	NAD(P)-binding Rossmann-fold superfamily protein
AT5G37660.2	AT5G37660	29	26	18	81	90	63	2.0983	1.13955	0.00830205	plasmodesmata-located protein 7
AT5G53810.1	AT5G53810	54	67	52	38	44	37	2.14934	-1.093	0.00830205	O-methyltransferase family protein
AT5G60450.1	AT5G60450	405	304	309	740	804	706	5.46972	0.592854	0.00830205	auxin response factor 4
AT2G16018.1	AT2G16018	22	65	12	8	10	15	1.06862	-2.07805	0.00831884	unknown protein
AT2G38610.2	AT2G38610	254	270	210	503	550	573	5.00321	0.597778	0.00836477	RNA-binding KH domain-containing protein
AT5G58350.1	AT5G58350	235	213	173	388	487	575	4.80924	0.680245	0.00848018	with no lysine (K) kinase 4
AT1G20920.2	AT1G20920	1618	2318	1269	1431	1598	1748	7.18337	-0.662338	0.00850375	P-loop containing nucleoside triphosphate hydrolases superfamily protein
AT4G32180.3	AT4G32180	1218	1071	1073	1162	1130	1076	6.61596	-0.559301	0.00851382	pantothenate kinase 2
AT4G08250.1	AT4G08250	27	25	28	14	19	9	0.959227	-1.48462	0.00851555	GRAS family transcription factor
AT5G34885.1	AT5G34885	21	7	28	52	113	129	2.26467	1.78842	0.00851555	Protein of unknown function (DUF784)
AT3G19660.1	AT3G19660	4	0	1	9	19	14	-0.309534	2.47144	0.00851701	unknown protein
AT5G59305.1	AT5G59305	7	2	2	16	23	24	0.226568	1.96148	0.00851772	unknown protein
AT4G11080.1	AT4G11080	340	559	253	328	310	328	4.95519	-0.78722	0.00855243	HMG (high mobility group) box protein
AT5G61270.2	AT5G61270	2	4	1	9	17	35	0.121084	2.5436	0.00856371	phytochrome-interacting factor7
AT2G23680.2	AT2G23680	26	25	16	10	15	10	0.710984	-1.46058	0.00859471	Cold acclimation protein WCOR413 family
AT3G46230.1	AT3G46230	7	33	3	2	1	4	-0.168685	-3.04136	0.00859552	heat shock protein 17.4
AT1G17360.1	AT1G17360	502	462	378	1192	927	839	5.86042	0.591111	0.00859737	unknown protein
AT2G04190.1	AT2G04190	6	4	2	0	0	0	-1.56349	-5.31792	0.00859737	TRAF-like family protein
AT5G27150.1	AT5G27150	484	410	318	931	826	811	5.67708	0.544289	0.00869033	Na+/H+ exchanger 1
AT4G00350.1	AT4G00350	134	509	57	33	41	136	3.80933	-2.21914	0.00870086	MATE efflux family protein
AT2G23610.1	AT2G23610	205	155	130	387	439	323	4.47033	0.69138	0.00870886	methyl esterase 3
AT1G56660.1	AT1G56660	250	1608	104	98	208	243	5.27704	-2.31765	0.00874901	unknown protein
AT1G45211.1	AT1G45211	13	3	6	20	47	57	1.08585	1.95473	0.00875373	pseudogene
AT5G04860.1	AT5G04860	293	334	376	291	336	248	4.8093	-0.783502	0.00877308	unknown protein
AT4G04840.1	AT4G04840	0	0	0	4	5	8	-1.3204	5.29497	0.00890353	methionine sulfoxide reductase B6
AT5G62165.3	AT5G62165	192	180	116	408	355	348	4.43529	0.653503	0.00890353	AGAMOUS-like 42
AT3G03341.1	AT3G03341	0	0	1	12	3	15	-0.760822	3.98288	0.00897088	unknown protein
AT5G57910.1	AT5G57910	100	109	103	229	274	303	3.92808	0.805895	0.0089926	unknown protein
AT1G70580.1	AT1G70580	349	314	237	674	661	592	5.2601	0.558098	0.00907129	alanine-2-oxoglutarate aminotransferase 2
AT3G16340.1	AT3G16340	338	284	356	876	687	790	5.49629	0.68851	0.00908628	pleiotropic drug resistance 1
AT3G10450.2	AT3G10450	451	392	233	316	338	333	4.89875	-0.64448	0.00909828	serine carboxypeptidase-like 7
AT3G48650.1	AT3G48650	6	2	0	9	26	26	0.137231	2.39235	0.00909828	pseudogene
AT4G14130.1	AT4G14130	168	140	85	324	282	327	4.16157	0.723616	0.00910438	xyloglucan endotransglucosylase/hydrolase 15
AT2G32885.1	AT2G32885	5	23	2	0	0	3	-0.639484	-3.63706	0.00914266	Rapid alkalinization factor (RALF) family protein
AT5G05590.1	AT5G05590	391	324	243	756	671	636	5.3521	0.570973	0.00914613	phosphoribosylanthranilate isomerase 2
AT1G72240.1	AT1G72240	19	23	15	38	86	130	2.10374	1.61216	0.00916295	unknown protein
AT4G27450.1	AT4G27450	113	68	75	39	56	74	2.67974	-1.13778	0.00926827	Aluminium induced protein with YGL and LRDR motifs
AT5G04340.1	AT5G04340	15	24	6	27	82	161	2.10485	2.07711	0.00934239	zinc finger of Arabidopsis thaliana 6
AT5G60300.3	AT5G60300	133	121	83	278	271	251	3.94777	0.711345	0.00934287	Concanavalin A-like lectin protein kinase family protein
AT1G76810.1	AT1G76810	3771	5348	2653	3356	3449	3899	8.35019	-0.668116	0.00934454	eukaryotic translation initiation factor 2 (eIF-2) family protein
AT2G28305.1	AT2G28305	97	103	87	232	201	354	3.86209	0.900383	0.00938178	Putative lysine decarboxylase family protein
AT2G45930.1	AT2G45930	18	35	17	60	104	93	2.18078	1.32995	0.00942094	unknown protein
AT1G66370.1	AT1G66370	0	0	0	4	11	3	-1.2724	5.3754	0.00946547	myb domain protein 113
AT2G34310.2	AT2G34310	224	176	188	429	453	467	4.71956	0.641319	0.00950052	unknown protein
AT4G22130.1	AT4G22130	643	555	480	1314	1351	997	6.17386	0.57744	0.00954793	STRUBBELIG-receptor family 8
AT2G21890.1	AT2G21890	11	5	7	1	2	3	-0.78069	-2.39649	0.00964329	cinnamyl alcohol dehydrogenase homolog 3
AT2G34820.1	AT2G34820	0	0	0	3	8	6	-1.32028	5.29562	0.00968879	basic helix-loop-helix (bHLH) DNA-binding superfamily protein
ATMG00590.1	ATMG00590	43	61	16	13	8	27	1.38775	-1.81103	0.00973925	Cytochrome b/b6 protein
AT2G07718.1	AT2G07718	43	61	16	13	8	27	1.38775	-1.81103	0.00973951	Cytochrome b/b6 protein
AT2G34310.1	AT2G34310	230	179	191	436	458	479	4.74592	0.638223	0.00993562	unknown protein
AT1G23080.1	AT1G23080	663	472	509	559	566	452	5.55453	-0.614119	0.00996147	Auxin efflux carrier family protein
AT1G34040.1	AT1G34040	151	147	102	117	121	77	3.40299	-0.882902	0.00996147	Pyridoxal phosphate (PLP)-dependent transferases superfamily protein
AT5G58750.1	AT5G58750	5	4	9	1	1	1	-1.09098	-2.99234	0.00996147	NAD(P)-binding Rossmann-fold superfamily protein
ATMG00830.1	ATMG00830	81	192	107	91	59	93	3.23995	-1.20737	0.00996147	cytochrome C biogenesis 382
AT2G07711.1	AT2G07711	306	718	290	251	323	377	5.07426	-1.00352	0.0100011	pseudogene
AT3G19370.3	AT3G19370	360	301	250	639	714	609	5.28422	0.564564	0.0100344	Plant protein of unknown function (DUF869)
AT1G23540.1	AT1G23540	24	83	13	2	6	19	1.22908	-2.62904	0.0100348	Protein kinase superfamily protein
AT2G13770.1	AT2G13770	0	1	0	2	8	17	-0.862577	3.86082	0.0100963	unknown protein
AT5G27120.1	AT5G27120	1629	2167	902	1293	1006	1580	6.96308	-0.792295	0.0101272	NOP56-like pre RNA processing ribonucleoprotein
AT5G37660.1	AT5G37660	28	29	20	82	93	66	2.14916	1.10089	0.0101275	plasmodesmata-located protein 7
AT4G21990.1	AT4G21990	1148	648	509	2466	1704	1492	6.72018	0.781695	0.010161	APS reductase 3
AT5G25280.2	AT5G25280	1541	1545	1142	1222	1380	1587	6.93001	-0.555617	0.010188	serine-rich protein-related
AT1G49320.1	AT1G49320	112	91	117	103	58	35	2.97862	-1.28826	0.0102198	unknown seed protein like 1
AT3G19370.2	AT3G19370	359	301	249	638	710	607	5.27981	0.562691	0.0102275	Plant protein of unknown function (DUF869)
AT3G09870.1	AT3G09870	3	3	1	9	15	37	0.12071	2.54939	0.0104313	SAUR-like auxin-responsive protein family
AT4G09850.1	AT4G09850	3	7	2	0	0	0	-1.562	-5.32629	0.0104587	unknown protein
AT5G62165.5	AT5G62165	160	156	98	343	314	298	4.21322	0.672006	0.0104806	AGAMOUS-like 42
AT1G70580.4	AT1G70580	342	310	235	659	651	583	5.23679	0.552753	0.0104925	alanine-2-oxoglutarate aminotransferase 2
AT2G41900.1	AT2G41900	1631	1306	1494	1510	1447	1416	7.00897	-0.587133	0.0105385	CCCH-type zinc finger protein with ARM repeat domain
AT2G32030.1	AT2G32030	2	0	0	6	5	25	-0.547357	3.47199	0.0105443	Acyl-CoA N-acyltransferases (NAT) superfamily protein
AT5G39320.1	AT5G39320	519	454	347	1190	902	811	5.83118	0.59586	0.0105443	UDP-glucose 6-dehydrogenase family protein
AT1G69790.1	AT1G69790	35	50	29	94	116	139	2.67003	1.06974	0.0105452	Protein kinase superfamily protein
AT3G16340.2	AT3G16340	335	278	354	864	676	783	5.47895	0.685701	0.0105452	pleiotropic drug resistance 1
AT5G43510.2	AT5G43510	33	13	28	47	134	177	2.55253	1.70959	0.0105452	Putative membrane lipoprotein
AT5G61520.2	AT5G61520	225	167	169	150	127	194	3.93073	-0.801219	0.0105452	Major facilitator superfamily protein
AT2G47810.1	AT2G47810	76	64	69	60	34	13	2.28411	-1.53238	0.0105983	nuclear factor Y, subunit B5
AT1G70580.3	AT1G70580	342	310	235	658	651	583	5.23634	0.552001	0.0106062	alanine-2-oxoglutarate aminotransferase 2
AT1G49600.1	AT1G49600	1110	827	641	907	820	811	6.20335	-0.552531	0.0106471	RNA-binding protein 47A
AT4G15800.1	AT4G15800	150	176	97	258	360	511	4.38026	0.887806	0.0107026	ralf-like 33
AT5G12890.1	AT5G12890	150	126	117	233	555	333	4.34493	0.964316	0.0109226	UDP-Glycosyltransferase superfamily protein
AT2G39851.1	AT2G39851	51	15	34	76	157	175	2.78212	1.47963	0.0109378	Proteinase inhibitor, propeptide
AT4G19970.1	AT4G19970	15	5	16	49	51	50	1.41812	1.48065	0.01095	unknown protein
AT3G14830.1	AT3G14830	474	484	388	416	473	449	5.28655	-0.558781	0.0110085	unknown protein
AT5G57050.1	AT5G57050	103	176	157	361	377	452	4.4606	0.864945	0.0110161	Protein phosphatase 2C family protein
AT5G26000.1	AT5G26000	25048	21337	29427	95484	54721	55682	11.8765	0.84531	0.0110352	thioglucoside glucohydrolase 1
AT2G35840.3	AT2G35840	729	562	595	1673	1412	1166	6.37333	0.612914	0.0110896	Sucrose-6F-phosphate phosphohydrolase family protein
AT3G28780.1	AT3G28780	73	383	35	30	22	83	3.27555	-2.34689	0.0110896	Protein of unknown function (DUF1216)
AT1G59700.1	AT1G59700	142	116	124	254	319	398	4.199	0.788595	0.0110942	glutathione S-transferase TAU 16
AT1G77885.1	AT1G77885	34	31	17	80	76	94	2.20625	1.07802	0.0111511	unknown protein
AT3G05760.1	AT3G05760	484	623	354	451	458	474	5.36769	-0.616386	0.0111511	C2H2 and C2HC zinc fingers superfamily protein
AT2G27080.1	AT2G27080	14	30	11	30	106	172	2.30318	1.95413	0.0111723	Late embryogenesis abundant (LEA) hydroxyproline-rich glycoprotein family
AT5G18270.1	AT5G18270	7	12	8	28	48	38	1.0513	1.51717	0.0111723	Arabidopsis NAC domain containing protein 87
AT3G15950.1	AT3G15950	4	8	7	21	25	85	1.12039	2.20044	0.0112003	DNA topoisomerase-related
AT4G21990.2	AT4G21990	954	553	410	2026	1392	1245	6.44537	0.769863	0.0112146	APS reductase 3
AT2G24600.3	AT2G24600	10	10	2	26	26	72	1.08271	1.98043	0.0112178	Ankyrin repeat family protein
AT4G14030.1	AT4G14030	1079	888	718	1916	1842	1811	6.80325	0.513127	0.0112178	selenium-binding protein 1
AT1G28310.1	AT1G28310	113	85	83	54	76	80	2.87693	-0.964542	0.0112366	Dof-type zinc finger DNA-binding family protein
AT3G30383.1	AT3G30383	13	8	13	21	76	95	1.66718	1.92659	0.0112868	Protein of unknown function (DUF784)
AT1G51940.1	AT1G51940	277	214	205	599	469	492	4.93504	0.614522	0.0112978	protein kinase family protein / peptidoglycan-binding LysM domain-containing protein
AT1G20990.1	AT1G20990	14	15	18	43	55	97	1.77169	1.47836	0.0113469	Cysteine/Histidine-rich C1 domain family protein
AT3G14810.1	AT3G14810	86	55	72	189	181	210	3.43488	0.886049	0.0113498	mechanosensitive channel of small conductance-like 5
AT5G26000.2	AT5G26000	23574	19986	27897	90856	51392	52852	11.7964	0.852087	0.0113498	thioglucoside glucohydrolase 1
AT1G74430.1	AT1G74430	511	630	423	993	1167	1300	6.08631	0.599305	0.0113595	myb domain protein 95
AT4G22130.2	AT4G22130	588	516	428	1162	1231	913	6.03249	0.563828	0.0113595	STRUBBELIG-receptor family 8
AT2G22470.1	AT2G22470	19	13	12	34	65	71	1.60415	1.40761	0.0113902	arabinogalactan protein 2
AT4G25340.2	AT4G25340	1127	1635	616	921	836	1046	6.48881	-0.78313	0.0114589	FK506 BINDING PROTEIN 53
AT2G07776.2	AT2G07776	45	79	40	39	30	34	2.02385	-1.21285	0.0114738	unknown protein
AT2G43018.1	AT2G43018	831	928	738	1607	1948	1859	6.74481	0.561598	0.0114965	conserved peptide upstream open reading frame 17
AT2G43020.1	AT2G43020	831	928	738	1607	1948	1859	6.74481	0.561598	0.0114969	polyamine oxidase 2
AT3G27880.1	AT3G27880	118	104	81	214	267	256	3.82258	0.742083	0.0115814	Protein of unknown function (DUF1645)
AT4G14030.2	AT4G14030	1072	884	713	1895	1833	1799	6.79329	0.510937	0.0115814	selenium-binding protein 1
AT5G02170.1	AT5G02170	8	9	5	38	21	36	0.805542	1.55729	0.0115821	Transmembrane amino acid transporter family protein
AT5G43700.1	AT5G43700	667	639	593	672	632	624	5.79948	-0.538002	0.0115891	AUX/IAA transcriptional regulator family protein
AT1G23080.3	AT1G23080	671	478	527	568	584	460	5.58507	-0.612217	0.0116043	Auxin efflux carrier family protein
AT5G38130.1	AT5G38130	193	142	413	221	103	108	4.22644	-1.45122	0.01161	HXXXD-type acyl-transferase family protein
AT1G60190.1	AT1G60190	2	7	3	33	18	17	0.322909	1.92325	0.0116167	ARM repeat superfamily protein
AT3G15950.2	AT3G15950	4	8	7	21	25	80	1.07724	2.14492	0.0116416	DNA topoisomerase-related
ATMG01090.1	ATMG01090	51	52	24	27	18	30	1.62664	-1.27414	0.011671	ATP synthase 9 mitochondrial
AT1G76720.1	AT1G76720	767	1247	590	546	631	936	6.11567	-0.833723	0.0116825	eukaryotic translation initiation factor 2 (eIF-2) family protein
AT2G01200.1	AT2G01200	59	63	36	26	42	35	1.98407	-1.14375	0.0117286	indole-3-acetic acid inducible 32
AT1G01690.1	AT1G01690	258	286	175	234	212	217	4.33083	-0.653173	0.0117407	putative recombination initiation defects 3
AT3G19370.1	AT3G19370	362	303	251	640	715	607	5.28727	0.556781	0.0117691	Plant protein of unknown function (DUF869)
AT3G24420.1	AT3G24420	57	10	34	158	156	105	2.80845	1.50293	0.0117691	alpha/beta-Hydrolases superfamily protein
AT5G27920.1	AT5G27920	458	446	281	384	402	366	5.07728	-0.571458	0.0118633	F-box family protein
AT2G40400.1	AT2G40400	430	283	273	355	271	282	4.78569	-0.659275	0.0118647	Protein of unknown function (DUF399 and DUF3411)
AT3G22540.1	AT3G22540	68	83	78	49	69	35	2.5397	-1.1512	0.0118647	Protein of unknown function (DUF1677)
AT1G05200.2	AT1G05200	263	263	160	426	547	582	4.9191	0.651897	0.0118769	glutamate receptor 3.4
AT5G53930.1	AT5G53930	396	442	330	412	376	369	5.07925	-0.564458	0.0118769	unknown protein
AT1G74090.1	AT1G74090	394	293	321	654	741	947	5.50286	0.660788	0.0119194	desulfo-glucosinolate sulfotransferase 18
AT4G18360.1	AT4G18360	18	17	20	63	56	65	1.76287	1.17618	0.0119281	Aldolase-type TIM barrel family protein
AT5G62165.1	AT5G62165	187	185	109	398	356	340	4.41274	0.655126	0.0119491	AGAMOUS-like 42
AT5G17760.1	AT5G17760	850	892	625	1432	1853	1811	6.65639	0.565782	0.0120048	P-loop containing nucleoside triphosphate hydrolases superfamily protein
AT4G26190.1	AT4G26190	1722	2772	1218	1357	1415	1977	7.25731	-0.793694	0.0120844	Haloacid dehalogenase-like hydrolase (HAD) superfamily protein
AT1G77690.1	AT1G77690	440	382	357	395	355	416	5.09409	-0.569452	0.0121218	like AUX1 3
AT2G18260.1	AT2G18260	72	59	49	29	43	50	2.19133	-1.09732	0.0121218	syntaxin of plants 112
AT1G70580.2	AT1G70580	345	313	238	664	654	584	5.24674	0.544748	0.012163	alanine-2-oxoglutarate aminotransferase 2
AT5G06390.1	AT5G06390	497	418	387	915	1000	855	5.78968	0.538105	0.012163	FASCICLIN-like arabinogalactan protein 17 precursor
AT1G33800.1	AT1G33800	12	12	15	75	37	46	1.4932	1.43956	0.0122441	Protein of unknown function (DUF579)
AT2G42610.2	AT2G42610	159	110	89	76	111	87	3.22547	-0.912951	0.0123095	Protein of unknown function (DUF640)
AT5G09870.1	AT5G09870	1265	1139	890	2286	2235	2251	7.09139	0.497807	0.0123491	cellulose synthase 5
AT3G10930.1	AT3G10930	4	7	2	10	33	46	0.623077	2.22661	0.0124377	unknown protein
AT4G15030.2	AT4G15030	424	726	283	319	355	459	5.23426	-0.861508	0.0125019	unknown protein
AT4G30140.1	AT4G30140	117	310	79	21	46	125	3.42495	-1.90354	0.0125374	GDSL-like Lipase/Acylhydrolase superfamily protein
AT3G14840.2	AT3G14840	1597	1616	950	1341	1377	1390	6.89438	-0.54532	0.0125491	Leucine-rich repeat transmembrane protein kinase
AT5G20190.1	AT5G20190	859	771	638	1594	1567	1526	6.56045	0.500772	0.0125491	Tetratricopeptide repeat (TPR)-like superfamily protein
AT5G24760.1	AT5G24760	159	128	128	405	301	292	4.26143	0.710108	0.0125491	GroES-like zinc-binding dehydrogenase family protein
AT3G02040.1	AT3G02040	204	266	151	196	161	185	4.09083	-0.735253	0.0125814	senescence-related gene 3
AT4G17250.1	AT4G17250	4	0	3	11	14	33	0.0688679	2.45256	0.0126013	unknown protein
AT3G19553.1	AT3G19553	147	115	150	298	401	352	4.31411	0.779411	0.0126183	Amino acid permease family protein
AT2G32130.1	AT2G32130	0	1	0	3	6	15	-0.972948	3.6913	0.012622	Plant protein of unknown function (DUF641)
AT2G46450.1	AT2G46450	480	285	219	234	307	297	4.72604	-0.744542	0.012623	cyclic nucleotide-gated channel 12
AT5G03150.1	AT5G03150	184	141	134	142	105	141	3.64397	-0.789576	0.012623	C2H2-like zinc finger protein
AT1G03710.2	AT1G03710	197	234	110	438	397	428	4.60194	0.699237	0.0126292	Cystatin/monellin superfamily protein
AT2G36120.1	AT2G36120	802	785	410	561	433	734	5.75489	-0.724235	0.0126431	Glycine-rich protein family
AT5G67060.1	AT5G67060	0	0	0	6	4	5	-1.42224	5.11709	0.012677	basic helix-loop-helix (bHLH) DNA-binding superfamily protein
AT5G42955.1	AT5G42955	11	11	11	24	63	61	1.37866	1.60339	0.012684	Protein of unknown function (DUF784)
AT1G68470.1	AT1G68470	52	25	33	114	116	103	2.60776	1.05307	0.0126978	Exostosin family protein
AT4G15350.1	AT4G15350	14	16	14	7	9	3	0.10481	-1.7443	0.0126978	cytochrome P450, family 705, subfamily A, polypeptide 2
AT3G07850.1	AT3G07850	1759	6904	833	428	733	2047	7.60872	-2.05105	0.0126998	Pectin lyase-like superfamily protein
AT2G01200.2	AT2G01200	65	73	38	30	46	40	2.1397	-1.12496	0.012707	indole-3-acetic acid inducible 32
AT3G14830.2	AT3G14830	469	482	384	415	475	444	5.27774	-0.551152	0.0127621	unknown protein
AT5G08750.3	AT5G08750	420	445	372	336	412	446	5.15135	-0.605703	0.0127858	RING/FYVE/PHD zinc finger superfamily protein
AT1G01120.1	AT1G01120	724	485	698	1571	1396	1585	6.44819	0.678703	0.0127888	3-ketoacyl-CoA synthase 1
AT2G22660.2	AT2G22660	1865	1807	1455	1608	1936	1668	7.22591	-0.524365	0.0127888	Protein of unknown function (duplicated DUF1399)
AT5G02750.1	AT5G02750	247	292	174	161	262	178	4.27023	-0.781302	0.0128993	RING/U-box superfamily protein
AT4G11653.1	AT4G11653	12	4	8	23	45	42	0.981786	1.64115	0.0129099	RALF-like 29
AT1G75050.1	AT1G75050	6	7	6	30	27	24	0.608554	1.52662	0.0129139	Pathogenesis-related thaumatin superfamily protein
AT1G48280.1	AT1G48280	191	136	150	359	485	325	4.47871	0.739451	0.012923	hydroxyproline-rich glycoprotein family protein
AT3G28270.1	AT3G28270	578	378	243	1298	516	2325	6.11261	1.28309	0.012923	Protein of unknown function (DUF677)
AT3G19010.1	AT3G19010	418	361	210	706	707	724	5.39513	0.592259	0.0130263	2-oxoglutarate (2OG) and Fe(II)-dependent oxygenase superfamily protein
AT5G05590.2	AT5G05590	344	299	222	673	605	562	5.19603	0.551181	0.0130263	phosphoribosylanthranilate isomerase 2
AT3G52490.1	AT3G52490	261	279	243	230	269	240	4.4816	-0.642027	0.0130372	Double Clp-N motif-containing P-loop nucleoside triphosphate hydrolases superfamily protein
AT1G07220.1	AT1G07220	489	425	378	432	414	452	5.23291	-0.542834	0.0130811	Arabidopsis thaliana protein of unknown function (DUF821)
AT4G27870.1	AT4G27870	483	416	332	745	866	1104	5.73729	0.602259	0.0130811	Vacuolar iron transporter (VIT) family protein
AT5G56320.1	AT5G56320	42	24	34	22	21	16	1.31069	-1.31233	0.013124	expansin A14
AT5G54390.1	AT5G54390	1159	1075	966	2194	2492	2100	7.082	0.529332	0.0131249	HAL2-like
AT3G19010.2	AT3G19010	381	329	192	648	648	655	5.26417	0.593104	0.013145	2-oxoglutarate (2OG) and Fe(II)-dependent oxygenase superfamily protein
AT3G28270.2	AT3G28270	576	370	241	1295	508	2295	6.09817	1.28336	0.0131883	Protein of unknown function (DUF677)
AT5G54206.1	AT5G54206	2	10	4	0	0	2	-1.23438	-3.29045	0.0132256	pseudogene
AT5G28020.6	AT5G28020	71	34	30	135	109	168	2.89357	1.09108	0.0132274	cysteine synthase D2
AT2G22330.1	AT2G22330	74	51	83	134	230	371	3.66528	1.24009	0.0132517	cytochrome P450, family 79, subfamily B, polypeptide 3
AT4G17900.2	AT4G17900	734	661	551	592	735	632	5.82264	-0.536379	0.0132768	PLATZ transcription factor family protein
AT4G39800.1	AT4G39800	2509	2072	2224	6734	4886	4195	8.24983	0.649018	0.0132826	myo-inositol-1-phosphate synthase 1
AT5G19730.1	AT5G19730	695	711	619	770	654	624	5.88853	-0.543203	0.0133408	Pectin lyase-like superfamily protein
AT4G17900.1	AT4G17900	776	688	580	623	780	653	5.89292	-0.537563	0.0134172	PLATZ transcription factor family protein
AT2G22660.1	AT2G22660	1839	1778	1434	1585	1911	1649	7.20557	-0.521472	0.0134275	Protein of unknown function (duplicated DUF1399)
AT5G25980.2	AT5G25980	38096	34279	44304	112806	87719	83620	12.3998	0.692992	0.0134352	glucoside glucohydrolase 2
AT2G31570.1	AT2G31570	557	307	376	1094	881	896	5.79052	0.662996	0.0134654	glutathione peroxidase 2
AT5G42957.1	AT5G42957	5	1	5	14	23	26	0.230901	1.93379	0.0134769	Protein of unknown function (DUF784)
AT5G23860.2	AT5G23860	503	457	411	987	941	948	5.85262	0.515228	0.0134843	tubulin beta 8
AT4G37050.1	AT4G37050	19	23	15	59	71	54	1.77162	1.14229	0.0134868	PATATIN-like protein 4
AT1G72280.1	AT1G72280	32	27	15	91	61	81	2.09587	1.12455	0.0134975	endoplasmic reticulum oxidoreductins 1
AT3G24360.2	AT3G24360	48	73	53	174	166	146	3.17444	0.920065	0.0135151	ATP-dependent caseinolytic (Clp) protease/crotonase family protein
AT1G29440.1	AT1G29440	267	267	233	268	212	247	4.45161	-0.633789	0.0135279	SAUR-like auxin-responsive protein family
AT5G17760.2	AT5G17760	830	879	608	1389	1806	1781	6.62337	0.562759	0.013654	P-loop containing nucleoside triphosphate hydrolases superfamily protein
AT4G29930.3	AT4G29930	1	1	5	23	17	12	-0.0428291	2.26055	0.0137561	basic helix-loop-helix (bHLH) DNA-binding superfamily protein
AT1G04220.1	AT1G04220	1156	865	1000	2121	2367	2182	7.03732	0.579392	0.013758	3-ketoacyl-CoA synthase 2
AT4G14368.1	AT4G14368	8	22	3	0	4	2	-0.459044	-2.8737	0.0138052	Regulator of chromosome condensation (RCC1) family protein
AT1G62180.2	AT1G62180	859	584	444	1623	1318	1191	6.33461	0.60663	0.0138162	5'adenylylphosphosulfate reductase 2
AT4G36520.1	AT4G36520	1778	4107	1391	1419	1720	2134	7.53553	-0.989087	0.0138162	Chaperone DnaJ-domain superfamily protein
ATMG00140.1	ATMG00140	9	36	6	2	7	4	0.128958	-2.44536	0.0138162	unknown protein
AT5G34887.1	AT5G34887	19	7	25	44	104	100	2.05361	1.68195	0.0138318	Protein of unknown function (DUF784)
AT5G41550.1	AT5G41550	27	29	22	63	86	98	2.18125	1.11476	0.0138318	Disease resistance protein (TIR-NBS-LRR class) family
AT4G17260.1	AT4G17260	812	439	519	662	470	415	5.60075	-0.739412	0.0138318	Lactate/malate dehydrogenase family protein
AT5G07410.1	AT5G07410	891	3578	468	237	455	1084	6.68544	-1.96385	0.0138583	Pectin lyase-like superfamily protein
AT1G48100.1	AT1G48100	1015	993	994	1209	878	791	6.43026	-0.632247	0.0139042	Pectin lyase-like superfamily protein
AT2G36830.1	AT2G36830	7579	6770	5851	7899	6161	6546	9.20527	-0.522898	0.01392	gamma tonoplast intrinsic protein
AT3G24510.1	AT3G24510	29	12	15	35	109	106	2.0793	1.62857	0.0139619	Defensin-like (DEFL) family protein
AT3G63300.2	AT3G63300	268	379	207	214	255	280	4.55316	-0.726992	0.0139671	FORKED 1
AT4G36990.1	AT4G36990	128	161	87	284	274	351	4.12059	0.739168	0.0139697	heat shock factor 4
AT3G51240.1	AT3G51240	536	266	341	1627	871	712	5.8468	0.940659	0.0139883	flavanone 3-hydroxylase
AT4G36988.1	AT4G36988	128	161	87	284	274	351	4.12059	0.73917	0.0140006	conserved peptide upstream open reading frame 49
AT5G28020.4	AT5G28020	71	34	31	136	109	168	2.89946	1.082	0.0140337	cysteine synthase D2
AT1G18200.1	AT1G18200	34	77	17	10	15	27	1.48624	-1.79549	0.0140484	RAB GTPase homolog A6B
AT3G51240.2	AT3G51240	522	254	336	1591	849	701	5.81329	0.947666	0.0140484	flavanone 3-hydroxylase
AT1G75580.1	AT1G75580	285	209	148	179	220	151	4.11943	-0.745855	0.0140724	SAUR-like auxin-responsive protein family
AT5G55820.1	AT5G55820	509	859	329	506	430	468	5.49968	-0.797004	0.0140724	unknown protein
AT1G67300.1	AT1G67300	482	450	361	939	842	904	5.75655	0.507721	0.0140744	Major facilitator superfamily protein
AT4G33550.2	AT4G33550	16	4	12	74	30	50	1.40747	1.69737	0.0141141	Bifunctional inhibitor/lipid-transfer protein/seed storage 2S albumin superfamily protein
AT1G57680.1	AT1G57680	674	767	463	1271	1351	1394	6.32215	0.541695	0.0141207	unknown protein
AT5G41400.1	AT5G41400	144	159	116	280	353	345	4.24837	0.676399	0.0141207	RING/U-box superfamily protein
AT4G25340.1	AT4G25340	1187	1697	651	993	886	1112	6.56499	-0.755563	0.0141271	FK506 BINDING PROTEIN 53
AT1G52190.1	AT1G52190	2838	2369	2261	2576	2652	2455	7.7782	-0.513292	0.014139	Major facilitator superfamily protein
AT1G80760.1	AT1G80760	1075	1089	1182	2129	3366	2593	7.27081	0.696891	0.0141477	NOD26-like intrinsic protein 6;1
AT1G05200.1	AT1G05200	262	265	160	424	540	581	4.91422	0.640412	0.0141616	glutamate receptor 3.4
AT2G35840.2	AT2G35840	877	719	726	1923	1673	1455	6.64192	0.562098	0.0141616	Sucrose-6F-phosphate phosphohydrolase family protein
AT3G05060.1	AT3G05060	2045	3082	1269	1930	1588	1992	7.43388	-0.737099	0.0141616	NOP56-like pre RNA processing ribonucleoprotein
AT3G05690.1	AT3G05690	155	96	129	119	82	92	3.33103	-0.937673	0.0141616	nuclear factor Y, subunit A2
AT3G11450.1	AT3G11450	1609	2120	1193	1311	1503	1797	7.1132	-0.629884	0.0141616	DnaJ domain ;Myb-like DNA-binding domain
AT5G01500.1	AT5G01500	251	263	173	512	491	475	4.87712	0.566336	0.0141616	thylakoid ATP/ADP carrier
AT5G65040.1	AT5G65040	69	70	60	152	192	176	3.29952	0.832862	0.0141624	Protein of unknown function (DUF581)
AT2G38400.1	AT2G38400	376	644	324	331	339	466	5.18772	-0.783075	0.0142059	alanine:glyoxylate aminotransferase 3
AT3G62170.1	AT3G62170	708	2943	362	153	353	843	6.36585	-2.05954	0.0142059	VANGUARD 1 homolog 2
AT4G29930.2	AT4G29930	1	3	5	20	21	14	0.0560544	2.00373	0.0142059	basic helix-loop-helix (bHLH) DNA-binding superfamily protein
AT1G23870.1	AT1G23870	484	410	340	286	425	437	5.11867	-0.644206	0.0142094	trehalose-phosphatase/synthase 9
AT3G21670.1	AT3G21670	317	268	288	669	541	864	5.31825	0.685151	0.0142141	Major facilitator superfamily protein
AT5G15740.1	AT5G15740	272	223	191	542	477	463	4.88054	0.566718	0.0142141	O-fucosyltransferase family protein
AT4G20820.1	AT4G20820	10	6	2	25	44	19	0.674072	1.76099	0.0142241	FAD-binding Berberine family protein
AT4G17940.1	AT4G17940	882	740	666	786	802	764	6.0692	-0.509062	0.0142476	Tetratricopeptide repeat (TPR)-like superfamily protein
AT1G67950.1	AT1G67950	249	257	174	495	509	461	4.86433	0.567446	0.0142518	RNA-binding (RRM/RBD/RNP motifs) family protein
AT3G14560.1	AT3G14560	2208	2032	1625	1872	2279	1753	7.41161	-0.535094	0.0143171	unknown protein
AT2G01180.2	AT2G01180	90	90	61	113	293	417	3.82714	1.24025	0.014407	phosphatidic acid phosphatase 1
AT2G35840.1	AT2G35840	874	717	722	1916	1661	1448	6.63514	0.560441	0.0144097	Sucrose-6F-phosphate phosphohydrolase family protein
AT3G01630.1	AT3G01630	32	84	15	10	14	25	1.48869	-1.90924	0.0144097	Major facilitator superfamily protein
AT1G68620.1	AT1G68620	5	8	2	15	21	68	0.81758	2.25642	0.0144755	alpha/beta-Hydrolases superfamily protein
AT5G44620.1	AT5G44620	9859	7009	7560	8885	8432	5775	9.43785	-0.637489	0.0144755	cytochrome P450, family 706, subfamily A, polypeptide 3
AT2G30490.1	AT2G30490	891	639	643	1980	1512	1343	6.56175	0.602961	0.0145042	cinnamate-4-hydroxylase
AT2G02720.1	AT2G02720	178	657	87	48	86	203	4.26686	-1.93948	0.0145112	Pectate lyase family protein
AT3G44006.1	AT3G44006	1	5	6	0	0	0	-1.55588	-5.38154	0.0145268	unknown protein
AT5G28020.3	AT5G28020	71	34	31	135	109	168	2.89713	1.07856	0.0145541	cysteine synthase D2
AT2G07777.1	AT2G07777	47	48	23	26	16	29	1.5343	-1.24924	0.0145593	ATP synthase 9 mitochondrial
AT3G28080.2	AT3G28080	165	139	131	121	139	118	3.58541	-0.753371	0.0145679	nodulin MtN21 /EamA-like transporter family protein
AT5G28030.2	AT5G28030	15	15	21	66	51	63	1.71621	1.24058	0.0146059	L-cysteine desulfhydrase 1
AT5G41020.1	AT5G41020	1151	1953	922	930	1042	1417	6.76432	-0.783146	0.0146226	myb family transcription factor
AT3G05460.1	AT3G05460	84	27	62	128	246	240	3.40354	1.2703	0.0146359	sporozoite surface protein-related
AT2G13610.1	AT2G13610	240	252	230	528	529	538	4.98154	0.582006	0.0146585	ABC-2 type transporter family protein
AT2G34670.2	AT2G34670	253	232	185	228	208	201	4.25217	-0.617619	0.0146737	Protein of unknown function (DUF630 and DUF632)
AT4G30340.1	AT4G30340	217	149	163	491	390	362	4.58576	0.679142	0.0146737	diacylglycerol kinase 7
AT5G62165.4	AT5G62165	184	168	102	395	322	319	4.33228	0.661394	0.0146737	AGAMOUS-like 42
AT1G75300.1	AT1G75300	440	419	373	959	1046	720	5.74516	0.588881	0.0147016	NmrA-like negative transcriptional regulator family protein
AT5G51870.3	AT5G51870	2	1	0	15	8	8	-0.664519	2.71573	0.0147016	AGAMOUS-like 71
AT2G01990.1	AT2G01990	73	86	44	45	45	54	2.37791	-1.02172	0.0147329	unknown protein
AT4G32212.1	AT4G32212	30	21	38	132	93	86	2.46574	1.21538	0.0147329	pseudogene
AT1G02816.1	AT1G02816	104	88	92	232	231	236	3.74748	0.741035	0.0147363	Protein of unknown function, DUF538
AT5G65480.1	AT5G65480	624	710	536	553	715	582	5.75836	-0.567102	0.0147555	unknown protein
AT5G28030.1	AT5G28030	15	15	21	66	51	64	1.72177	1.24855	0.0147646	L-cysteine desulfhydrase 1
AT4G04570.2	AT4G04570	34	38	5	9	5	12	0.723713	-2.02147	0.0148664	cysteine-rich RLK (RECEPTOR-like protein kinase) 40
AT1G71720.1	AT1G71720	554	451	346	435	434	476	5.28266	-0.540552	0.0149387	Nucleic acid-binding proteins superfamily
AT3G28080.1	AT3G28080	176	147	138	129	152	121	3.6702	-0.74774	0.0149834	nodulin MtN21 /EamA-like transporter family protein
AT3G62610.1	AT3G62610	48	49	49	174	121	123	2.95246	0.950841	0.0149892	myb domain protein 11
AT3G29810.1	AT3G29810	127	188	119	281	366	462	4.38273	0.803926	0.0150025	COBRA-like protein 2 precursor
AT5G28020.2	AT5G28020	71	34	32	135	109	168	2.90068	1.06617	0.0150082	cysteine synthase D2
AT2G31110.2	AT2G31110	513	515	357	269	554	354	5.2323	-0.770279	0.0150086	Plant protein of unknown function (DUF828)
AT4G24810.3	AT4G24810	502	513	333	367	429	499	5.2594	-0.591227	0.0150273	Protein kinase superfamily protein
AT5G24760.3	AT5G24760	151	125	123	389	286	280	4.20135	0.702945	0.0150311	GroES-like zinc-binding dehydrogenase family protein
AT5G25980.1	AT5G25980	35010	30978	41148	105325	80128	77111	12.2829	0.700424	0.0150311	glucoside glucohydrolase 2
AT1G19960.1	AT1G19960	105	61	15	271	211	155	3.431	1.3497	0.0151432	unknown protein
AT4G16146.1	AT4G16146	280	271	174	546	494	511	4.94676	0.563659	0.0151826	cAMP-regulated phosphoprotein 19-related protein
AT3G26235.1	AT3G26235	6	5	12	1	1	3	-0.806789	-2.69311	0.0151905	unknown protein
AT5G08750.2	AT5G08750	437	459	397	359	435	469	5.22341	-0.590939	0.0151905	RING/FYVE/PHD zinc finger superfamily protein
AT5G25980.3	AT5G25980	34834	30774	40997	104998	79731	76748	12.2765	0.701408	0.0152035	glucoside glucohydrolase 2
AT3G44550.1	AT3G44550	5	5	2	23	2	229	1.8514	3.86793	0.0152747	fatty acid reductase 5
AT5G55850.2	AT5G55850	395	393	296	746	875	686	5.52436	0.544947	0.0154351	RPM1-interacting protein 4 (RIN4) family protein
AT4G31550.2	AT4G31550	306	347	253	490	787	938	5.39365	0.74377	0.0156231	WRKY DNA-binding protein 11
AT2G22650.1	AT2G22650	202	212	133	160	151	177	3.91913	-0.699007	0.0156274	FAD-dependent oxidoreductase family protein
AT2G01180.1	AT2G01180	89	93	66	122	282	401	3.81785	1.16089	0.0156338	phosphatidic acid phosphatase 1
AT2G42610.1	AT2G42610	167	115	92	83	119	92	3.30151	-0.873548	0.0157055	Protein of unknown function (DUF640)
AT3G30385.1	AT3G30385	26	8	26	40	117	158	2.35664	1.81024	0.0158306	Protein of unknown function (DUF784)
AT3G30387.1	AT3G30387	26	8	26	40	117	158	2.35664	1.81024	0.0158306	Protein of unknown function (DUF784)
AT3G24360.1	AT3G24360	52	76	62	188	180	156	3.28787	0.895643	0.0158396	ATP-dependent caseinolytic (Clp) protease/crotonase family protein
AT3G19030.1	AT3G19030	2	1	3	3	31	44	0.37636	3.06881	0.0158404	unknown protein
AT3G50640.1	AT3G50640	4	3	3	17	16	21	0.0548101	1.85728	0.0158878	unknown protein
AT4G19030.1	AT4G19030	0	0	0	11	4	2	-1.32166	5.28774	0.0160933	NOD26-like major intrinsic protein 1
AT5G06750.1	AT5G06750	154	114	108	300	291	276	4.08128	0.659881	0.0162949	Protein phosphatase 2C family protein
AT4G15030.1	AT4G15030	437	749	294	343	379	479	5.29463	-0.824629	0.0163371	unknown protein
AT1G45223.1	AT1G45223	85	13	62	123	274	355	3.59164	1.67037	0.0163383	Protein of unknown function (DUF784)
AT3G62820.1	AT3G62820	110	63	89	250	211	230	3.69628	0.839049	0.0164048	Plant invertase/pectin methylesterase inhibitor superfamily protein
AT4G30190.1	AT4G30190	4301	3206	2694	3464	3808	2341	8.16512	-0.622144	0.0164897	H(+)-ATPase 2
AT2G39660.1	AT2G39660	215	207	156	126	186	191	3.98992	-0.740604	0.0165423	botrytis-induced kinase1
AT3G09590.1	AT3G09590	9	6	4	2	1	1	-1.01432	-2.65106	0.0165873	CAP (Cysteine-rich secretory proteins, Antigen 5, and Pathogenesis-related 1 protein) superfamily protein
AT4G34970.1	AT4G34970	242	248	207	170	192	263	4.28221	-0.70906	0.0166006	actin depolymerizing factor 9
AT1G07330.1	AT1G07330	15	54	10	1	6	13	0.692441	-2.46261	0.0166171	unknown protein
AT1G10530.1	AT1G10530	104	103	105	97	59	86	3.05475	-0.933925	0.0166251	unknown protein
AT5G02170.2	AT5G02170	7	7	2	31	18	25	0.469865	1.66234	0.0166875	Transmembrane amino acid transporter family protein
AT2G01830.3	AT2G01830	407	373	242	673	702	783	5.42703	0.54912	0.0166932	CHASE domain containing histidine kinase protein
AT1G20823.1	AT1G20823	354	390	275	596	765	950	5.49272	0.638431	0.0167939	RING/U-box superfamily protein
AT1G75680.1	AT1G75680	912	808	727	1882	1820	1475	6.69179	0.527502	0.0168814	glycosyl hydrolase 9B7
AT5G24760.2	AT5G24760	151	125	124	386	286	279	4.19916	0.69275	0.0168814	GroES-like zinc-binding dehydrogenase family protein
AT3G25810.1	AT3G25810	22734	18114	21736	21718	20657	9915	10.7393	-0.835445	0.0168925	Terpenoid cyclases/Protein prenyltransferases superfamily protein
AT2G34670.1	AT2G34670	248	233	179	224	205	202	4.23307	-0.608175	0.0169473	Protein of unknown function (DUF630 and DUF632)
AT5G55850.1	AT5G55850	482	444	344	893	1001	772	5.7387	0.526973	0.0170465	RPM1-interacting protein 4 (RIN4) family protein
AT5G06750.3	AT5G06750	147	108	99	286	270	264	3.99861	0.668896	0.017116	Protein phosphatase 2C family protein
AT5G38820.1	AT5G38820	5	11	5	33	40	20	0.773039	1.5867	0.0171986	Transmembrane amino acid transporter family protein
AT4G31550.1	AT4G31550	300	337	252	479	770	915	5.36311	0.736028	0.0174745	WRKY DNA-binding protein 11
AT5G15140.1	AT5G15140	231	823	121	45	109	268	4.61373	-1.96645	0.0174757	Galactose mutarotase-like superfamily protein
AT5G57050.2	AT5G57050	95	169	148	329	356	429	4.3714	0.851343	0.0175512	Protein phosphatase 2C family protein
AT4G25810.1	AT4G25810	1	1	1	7	5	33	-0.287692	3.23795	0.0175781	xyloglucan endotransglycosylase 6
AT1G09500.2	AT1G09500	0	1	1	4	9	16	-0.757655	3.12408	0.0176347	NAD(P)-binding Rossmann-fold superfamily protein
AT5G43513.1	AT5G43513	29	8	21	32	119	159	2.32679	1.86223	0.0177181	Putative membrane lipoprotein
AT5G28020.1	AT5G28020	76	34	33	143	111	177	2.9619	1.07187	0.017728	cysteine synthase D2
AT1G14130.1	AT1G14130	143	126	125	302	304	301	4.15162	0.645752	0.0177588	2-oxoglutarate (2OG) and Fe(II)-dependent oxygenase superfamily protein
AT2G01830.1	AT2G01830	409	374	242	675	701	784	5.42937	0.546524	0.0177588	CHASE domain containing histidine kinase protein
AT3G07390.1	AT3G07390	1294	1124	884	2395	2369	2020	7.09323	0.497949	0.0177588	auxin-responsive family protein
AT1G09560.1	AT1G09560	784	498	672	2045	1975	1055	6.55428	0.807501	0.0178501	germin-like protein 5
AT5G43516.1	AT5G43516	22	7	19	31	91	127	2.03796	1.80616	0.0178601	pseudogene
AT2G27080.2	AT2G27080	14	30	12	28	103	168	2.27557	1.88128	0.0178647	Late embryogenesis abundant (LEA) hydroxyproline-rich glycoprotein family
AT3G45780.2	AT3G45780	1433	1202	1474	1544	1306	830	6.85054	-0.740199	0.017899	phototropin 1
AT3G15200.1	AT3G15200	69	70	43	47	39	48	2.24434	-0.973301	0.0179091	Tetratricopeptide repeat (TPR)-like superfamily protein
AT3G53920.1	AT3G53920	556	505	427	499	496	532	5.44828	-0.510756	0.0179436	RNApolymerase sigma-subunit C
AT3G11990.1	AT3G11990	46	19	27	58	127	167	2.59803	1.40004	0.0181244	Protein of unknown function (DUF784)
AT1G50990.1	AT1G50990	5	17	6	2	0	5	-0.578006	-2.47077	0.01817	Protein kinase protein with tetratricopeptide repeat domain
AT1G73010.1	AT1G73010	174	244	141	390	401	535	4.67192	0.704071	0.0181844	phosphate starvation-induced gene 2
AT1G33055.1	AT1G33055	21	9	8	1	4	8	-0.155825	-2.0242	0.0182154	unknown protein
AT2G23680.1	AT2G23680	26	24	16	11	15	12	0.732892	-1.32233	0.0182746	Cold acclimation protein WCOR413 family
AT5G42050.1	AT5G42050	941	1391	672	1879	2361	2835	7.07481	0.706076	0.0183427	DCD (Development and Cell Death) domain protein
ATMG00030.1	ATMG00030	754	2394	676	599	759	1052	6.54281	-1.1895	0.0184236	unknown protein
AT4G24810.2	AT4G24810	503	522	329	368	433	503	5.26648	-0.586286	0.0184531	Protein kinase superfamily protein
AT3G11080.1	AT3G11080	44	41	36	18	30	32	1.62668	-1.14107	0.0184665	receptor like protein 35
AT3G45780.1	AT3G45780	1430	1198	1472	1542	1306	827	6.84789	-0.739107	0.0186138	phototropin 1
AT2G46310.1	AT2G46310	225	202	124	134	146	191	3.90056	-0.749387	0.0186165	cytokinin response factor 5
AT2G39350.1	AT2G39350	253	294	360	178	130	345	4.572	-1.0686	0.0186297	ABC-2 type transporter family protein
AT1G17990.1	AT1G17990	49	21	18	45	115	260	2.7672	1.7547	0.0187698	FMN-linked oxidoreductases superfamily protein
AT1G18020.1	AT1G18020	48	21	15	44	110	251	2.71268	1.77856	0.0188242	FMN-linked oxidoreductases superfamily protein
AT3G01185.1	AT3G01185	34	9	19	42	100	139	2.23502	1.64367	0.0188242	Protein of unknown function (DUF784)
AT1G51500.1	AT1G51500	739	521	655	1502	1427	1337	6.38971	0.588086	0.0188773	ABC-2 type transporter family protein
AT5G53420.3	AT5G53420	102	90	67	162	221	307	3.68487	0.878404	0.0188773	CCT motif family protein
AT1G67950.3	AT1G67950	243	253	171	477	495	451	4.82847	0.553094	0.018904	RNA-binding (RRM/RBD/RNP motifs) family protein
AT2G01830.2	AT2G01830	410	376	248	674	707	788	5.43863	0.538497	0.0189302	CHASE domain containing histidine kinase protein
AT1G18350.1	AT1G18350	1	0	0	5	9	5	-1.17945	3.36029	0.0189438	MAP kinase kinase 7
AT4G31910.1	AT4G31910	314	373	217	297	313	195	4.63987	-0.703745	0.0189438	HXXXD-type acyl-transferase family protein
AT2G30070.1	AT2G30070	547	648	464	457	564	609	5.58092	-0.574221	0.0189563	potassium transporter 1
AT2G37640.1	AT2G37640	530	497	460	526	542	426	5.4398	-0.551645	0.0189563	Barwin-like endoglucanases superfamily protein
AT3G63300.1	AT3G63300	272	385	208	223	260	289	4.58087	-0.70121	0.0189563	FORKED 1
AT5G49640.1	AT5G49640	592	554	428	383	495	618	5.48172	-0.613779	0.0189961	unknown protein
AT4G22690.1	AT4G22690	302	194	124	359	601	567	4.84213	0.795417	0.0190274	cytochrome P450, family 706, subfamily A, polypeptide 1
AT1G14360.1	AT1G14360	268	346	234	579	598	685	5.20209	0.585067	0.0190384	UDP-galactose transporter 3
AT1G69940.1	AT1G69940	301	1342	135	89	164	370	5.1989	-1.99591	0.0191572	Pectin lyase-like superfamily protein
AT2G45400.1	AT2G45400	51	60	37	140	163	106	2.93197	0.924237	0.0191896	NAD(P)-binding Rossmann-fold superfamily protein
AT1G61810.3	AT1G61810	31	14	7	55	46	114	1.89038	1.55438	0.019325	beta-glucosidase 45
AT1G06475.1	AT1G06475	38	23	16	77	70	84	2.10301	1.05977	0.0193951	unknown protein
AT4G01720.1	AT4G01720	23	21	43	11	17	17	1.08184	-1.55479	0.0193951	WRKY family transcription factor
AT5G55720.1	AT5G55720	2	2	6	40	29	9	0.437801	2.32656	0.019411	Pectin lyase-like superfamily protein
AT1G57680.2	AT1G57680	640	746	445	1199	1306	1332	6.26063	0.53202	0.019425	unknown protein
AT3G23090.2	AT3G23090	2	3	6	15	24	23	0.216757	1.89479	0.0194764	TPX2 (targeting protein for Xklp2) protein family
AT3G62640.1	AT3G62640	73	215	32	9	35	61	2.70967	-2.09042	0.019481	Protein of unknown function (DUF3511)
ATCG00440.1	ATCG00440	470	699	293	294	305	543	5.25616	-0.876122	0.0194969	NADH:ubiquinone/plastoquinone oxidoreductase, chain 3 protein
AT3G02400.1	AT3G02400	250	429	195	201	247	274	4.55164	-0.808993	0.0194997	SMAD/FHA domain-containing protein
AT1G62500.1	AT1G62500	817	830	416	651	735	485	5.82693	-0.657199	0.0196085	Bifunctional inhibitor/lipid-transfer protein/seed storage 2S albumin superfamily protein
AT1G06100.1	AT1G06100	12	7	8	1	5	3	-0.551222	-2.07366	0.0196716	Fatty acid desaturase family protein
AT4G04900.1	AT4G04900	4	3	3	0	0	0	-1.68911	-5.07923	0.0196786	ROP-interactive CRIB motif-containing protein 10
AT1G05240.1	AT1G05240	10	40	14	8	10	7	0.546577	-1.88507	0.0196844	Peroxidase superfamily protein
AT4G11510.1	AT4G11510	4	0	1	5	18	22	-0.239303	2.58057	0.0196844	ralf-like 28
AT5G43518.1	AT5G43518	38	8	28	48	134	188	2.5875	1.7622	0.0197347	Putative membrane lipoprotein
AT1G20450.1	AT1G20450	2224	5284	1449	1757	2010	2504	7.81092	-1.02748	0.0198148	Dehydrin family protein
AT1G08570.1	AT1G08570	947	720	737	736	910	773	6.13085	-0.543701	0.0198289	atypical CYS HIS rich thioredoxin 4
AT5G16290.2	AT5G16290	709	472	448	1240	1039	1170	6.10153	0.543065	0.0198569	VALINE-TOLERANT 1
AT3G28080.3	AT3G28080	145	110	120	105	117	94	3.35816	-0.802953	0.0199021	nodulin MtN21 /EamA-like transporter family protein
AT2G19990.1	AT2G19990	0	0	0	4	6	4	-1.47554	5.0217	0.0199571	pathogenesis-related protein-1-like
AT3G62150.1	AT3G62150	351	283	143	196	259	193	4.36922	-0.766263	0.0199571	P-glycoprotein 21
AT2G25670.1	AT2G25670	2318	3247	1566	2158	2189	2359	7.64445	-0.617283	0.0201154	unknown protein
AT3G28040.1	AT3G28040	716	553	550	725	570	504	5.71656	-0.570131	0.0201154	Leucine-rich receptor-like protein kinase family protein
AT5G27520.1	AT5G27520	249	201	200	490	528	417	4.82699	0.588532	0.0201188	peroxisomal adenine nucleotide carrier 2
AT1G20450.2	AT1G20450	2114	5032	1366	1672	1902	2374	7.73615	-1.02978	0.0201624	Dehydrin family protein
AT4G20140.1	AT4G20140	16	26	24	11	14	11	0.721525	-1.43661	0.0201624	Leucine-rich repeat transmembrane protein kinase
AT5G06750.2	AT5G06750	123	88	83	239	227	231	3.7564	0.701994	0.0202163	Protein phosphatase 2C family protein
AT4G16630.1	AT4G16630	938	1180	617	855	740	998	6.2676	-0.606413	0.0202227	DEA(D/H)-box RNA helicase family protein
AT4G19430.1	AT4G19430	65	57	40	223	149	103	3.11085	1.01201	0.0202696	unknown protein
AT3G24535.1	AT3G24535	1	0	0	12	4	4	-1.13698	3.42967	0.0202793	unknown protein
AT3G46890.1	AT3G46890	1	2	4	9	19	23	-0.0617575	2.24716	0.0202793	unknown protein
AT5G57790.2	AT5G57790	153	153	154	364	330	367	4.37694	0.64	0.0202793	unknown protein
AT3G03640.1	AT3G03640	319	291	262	723	628	536	5.22925	0.558673	0.0203006	beta glucosidase 25
AT3G61820.1	AT3G61820	1731	1465	1170	3599	3210	2466	7.52309	0.545411	0.0203414	Eukaryotic aspartyl protease family protein
AT1G21440.1	AT1G21440	866	593	720	1598	1523	1657	6.56011	0.571082	0.0204048	Phosphoenolpyruvate carboxylase family protein
AT1G56385.1	AT1G56385	20	6	9	22	58	109	1.65161	1.90723	0.0204049	Plant self-incompatibility protein S1 family
AT2G36690.1	AT2G36690	7	13	4	3	1	3	-0.713997	-2.23851	0.0204333	2-oxoglutarate (2OG) and Fe(II)-dependent oxygenase superfamily protein
AT4G29930.1	AT4G29930	2	3	6	28	22	14	0.247372	1.93347	0.0204544	basic helix-loop-helix (bHLH) DNA-binding superfamily protein
AT3G51400.1	AT3G51400	119	146	88	76	110	97	3.23592	-0.856137	0.0205868	Arabidopsis protein of unknown function (DUF241)
AT5G65900.1	AT5G65900	732	1240	467	698	625	739	6.03364	-0.763813	0.0205868	DEA(D/H)-box RNA helicase family protein
AT1G08570.4	AT1G08570	876	681	679	673	849	731	6.02682	-0.540705	0.0206015	atypical CYS HIS rich thioredoxin 4
AT5G43525.1	AT5G43525	26	8	25	37	117	142	2.28354	1.74824	0.020617	Putative membrane lipoprotein
AT1G73210.1	AT1G73210	145	141	107	250	326	331	4.14597	0.663934	0.0206178	Protein of unknown function (DUF789)
AT1G50325.1	AT1G50325	6	3	14	29	47	43	1.06084	1.7522	0.0207065	Plant invertase/pectin methylesterase inhibitor superfamily protein
AT5G11950.1	AT5G11950	28	26	23	15	16	17	0.979202	-1.22349	0.0207242	Putative lysine decarboxylase family protein
AT1G56580.1	AT1G56580	2395	1513	1749	5498	3804	3663	7.96651	0.641433	0.0207374	Protein of unknown function, DUF538
AT1G63090.1	AT1G63090	297	321	225	636	658	513	5.16917	0.555146	0.0207374	phloem protein 2-A11
AT4G24810.1	AT4G24810	515	528	337	376	446	516	5.29796	-0.576787	0.0208203	Protein kinase superfamily protein
AT1G64720.1	AT1G64720	4798	4065	3957	3115	4265	4975	8.5224	-0.607551	0.0208716	Polyketide cyclase/dehydrase and lipid transport superfamily protein
AT2G16730.1	AT2G16730	293	1135	119	74	146	337	5.00483	-1.95446	0.0208716	glycosyl hydrolase family 35 protein
AT3G61890.1	AT3G61890	105	134	106	304	214	363	4.05727	0.791597	0.0208845	homeobox 12
AT2G21750.1	AT2G21750	12	4	8	18	56	46	1.07328	1.76726	0.0209847	Protein of unknown function (DUF1278)
AT1G10522.1	AT1G10522	409	313	221	255	307	324	4.72605	-0.613473	0.0211835	unknown protein
AT1G17430.1	AT1G17430	84	74	53	166	198	162	3.33189	0.781066	0.0211835	alpha/beta-Hydrolases superfamily protein
AT3G05030.1	AT3G05030	493	424	360	950	847	826	5.72897	0.491933	0.0211835	sodium hydrogen exchanger 2
AT3G62010.1	AT3G62010	912	847	802	1700	1790	1877	6.75338	0.508196	0.0211835	unknown protein
AT3G62010.2	AT3G62010	906	841	799	1691	1778	1870	6.74558	0.508871	0.0211835	unknown protein
AT4G33960.1	AT4G33960	5	9	4	20	31	28	0.568974	1.5775	0.0211835	unknown protein
AT1G28130.1	AT1G28130	273	329	387	276	288	328	4.8119	-0.741853	0.0212567	Auxin-responsive GH3 family protein
AT2G32160.2	AT2G32160	162	125	63	64	79	105	3.14108	-0.997968	0.0212754	S-adenosyl-L-methionine-dependent methyltransferases superfamily protein
AT4G01895.1	AT4G01895	22	28	14	64	58	75	1.87982	1.08322	0.0212981	systemic acquired resistance (SAR) regulator protein NIMIN-1-related
AT2G07723.1	AT2G07723	96	202	75	68	81	101	3.21949	-1.10512	0.0212991	pseudogene
AT5G07770.1	AT5G07770	339	334	308	698	778	636	5.39736	0.546537	0.0213258	Actin-binding FH2 protein
AT1G08570.3	AT1G08570	880	682	679	677	852	733	6.03088	-0.537865	0.0213317	atypical CYS HIS rich thioredoxin 4
AT1G73040.1	AT1G73040	110	176	109	284	337	344	4.20747	0.736071	0.0213914	Mannose-binding lectin superfamily protein
AT1G76550.1	AT1G76550	1013	951	758	1080	890	845	6.32063	-0.499057	0.0213914	Phosphofructokinase family protein
AT1G08230.2	AT1G08230	346	288	278	277	285	333	4.72025	-0.579553	0.0214198	Transmembrane amino acid transporter family protein
AT5G63590.1	AT5G63590	1	0	2	9	11	8	-0.755864	2.55077	0.0215504	flavonol synthase 3
AT5G50335.1	AT5G50335	88	184	94	245	427	350	4.22321	0.932245	0.0215614	unknown protein
ATMG00530.1	ATMG00530	20	38	16	14	14	12	0.858312	-1.41607	0.0216726	unknown protein
AT2G07663.1	AT2G07663	20	38	16	14	14	12	0.858312	-1.41607	0.0216728	pseudogene
AT5G65207.1	AT5G65207	175	188	139	87	131	182	3.74248	-0.870908	0.0217146	unknown protein
AT1G74890.1	AT1G74890	14	7	7	49	32	27	1.00161	1.40069	0.02178	response regulator 15
AT4G09640.1	AT4G09640	321	382	261	331	285	330	4.79557	-0.574433	0.021826	Protein of unknown function (DUF803)
ATCG00430.1	ATCG00430	1536	2445	1107	949	1114	1951	7.06478	-0.869054	0.021826	photosystem II reaction center protein G
AT2G34500.1	AT2G34500	2	3	3	17	12	19	-0.103177	1.99217	0.0218435	cytochrome P450, family 710, subfamily A, polypeptide 1
AT3G13390.1	AT3G13390	296	1186	161	85	167	386	5.12177	-1.85484	0.0218435	SKU5 similar 11
AT3G26830.1	AT3G26830	7	9	5	1	4	1	-0.855591	-2.26523	0.0218435	Cytochrome P450 superfamily protein
AT5G34881.1	AT5G34881	16	5	22	36	95	88	1.87326	1.74313	0.0218435	Protein of unknown function (DUF784)
AT2G32160.3	AT2G32160	171	129	66	65	80	113	3.20215	-1.00444	0.0218796	S-adenosyl-L-methionine-dependent methyltransferases superfamily protein
AT1G76820.1	AT1G76820	707	881	506	567	607	812	5.88739	-0.610949	0.022099	eukaryotic translation initiation factor 2 (eIF-2) family protein
AT1G17990.2	AT1G17990	48	20	16	42	110	249	2.7025	1.76077	0.0221093	FMN-linked oxidoreductases superfamily protein
AT4G19460.1	AT4G19460	132	90	101	92	81	93	3.12935	-0.831701	0.0221093	UDP-Glycosyltransferase superfamily protein
AT5G25280.1	AT5G25280	1494	1485	1085	1207	1372	1565	6.88913	-0.512649	0.0221093	serine-rich protein-related
AT5G13290.1	AT5G13290	293	358	258	242	316	308	4.69773	-0.62047	0.0222042	Protein kinase superfamily protein
AT1G32520.1	AT1G32520	227	173	165	134	195	174	3.97219	-0.712494	0.0222914	unknown protein
AT4G17250.2	AT4G17250	2	0	2	8	9	23	-0.382281	2.68123	0.0222914	unknown protein
AT1G52880.1	AT1G52880	49	51	45	101	158	148	2.92476	0.934003	0.0223198	NAC (No Apical Meristem) domain transcriptional regulator superfamily protein
AT1G54890.1	AT1G54890	62	65	31	9	17	46	1.82508	-1.63785	0.0223474	Late embryogenesis abundant (LEA) protein-related
AT1G70940.1	AT1G70940	1469	1553	1553	1264	1449	1772	7.05562	-0.600475	0.0223474	Auxin efflux carrier family protein
AT1G73210.2	AT1G73210	149	143	107	255	324	332	4.15726	0.649847	0.0224251	Protein of unknown function (DUF789)
AT1G67950.2	AT1G67950	236	247	165	465	484	431	4.78535	0.550948	0.0224723	RNA-binding (RRM/RBD/RNP motifs) family protein
AT4G22710.1	AT4G22710	212	120	87	259	418	373	4.30008	0.817648	0.0225491	cytochrome P450, family 706, subfamily A, polypeptide 2
AT3G09600.1	AT3G09600	463	425	632	423	442	506	5.43572	-0.749048	0.0225849	Homeodomain-like superfamily protein
AT3G26300.1	AT3G26300	384	257	242	257	320	255	4.64062	-0.623131	0.0225996	cytochrome P450, family 71, subfamily B, polypeptide 34
AT3G13910.1	AT3G13910	364	377	335	353	387	343	4.97669	-0.549983	0.0226039	Protein of unknown function (DUF3511)
AT5G22640.1	AT5G22640	2029	2291	1181	1829	1693	1848	7.2876	-0.557593	0.0226503	MORN (Membrane Occupation and Recognition Nexus) repeat-containing protein
AT2G42580.1	AT2G42580	478	440	401	958	912	862	5.78692	0.494824	0.022663	tetratricopetide-repeat thioredoxin-like 3
AT2G28085.1	AT2G28085	44	44	15	101	99	102	2.47707	1.04088	0.0226736	SAUR-like auxin-responsive protein family
AT3G46970.1	AT3G46970	1965	1337	1324	3408	3280	2998	7.59636	0.52219	0.0227156	alpha-glucan phosphorylase 2
AT2G29710.1	AT2G29710	107	75	94	218	240	232	3.72253	0.760662	0.0227299	UDP-Glycosyltransferase superfamily protein
AT1G65440.1	AT1G65440	2694	3346	1997	2727	2526	2842	7.86248	-0.528512	0.0227705	global transcription factor group B1
AT5G58320.2	AT5G58320	112	118	81	243	229	247	3.8132	0.666863	0.0228238	Kinase interacting (KIP1-like) family protein
AT1G60680.1	AT1G60680	14	13	12	41	48	42	1.30435	1.19307	0.0228502	NAD(P)-linked oxidoreductase superfamily protein
AT5G44020.1	AT5G44020	103	35	47	47	26	34	2.14436	-1.30907	0.0228504	HAD superfamily, subfamily IIIB acid phosphatase
AT2G25670.2	AT2G25670	2340	3271	1587	2227	2213	2391	7.6633	-0.604598	0.0228923	unknown protein
AT3G10370.1	AT3G10370	346	372	273	728	712	631	5.38059	0.515654	0.0229426	FAD-dependent oxidoreductase family protein
AT3G48500.2	AT3G48500	993	749	556	810	736	776	6.05178	-0.512241	0.0230204	Nucleic acid-binding, OB-fold-like protein
AT2G40650.1	AT2G40650	736	983	512	698	669	780	5.98445	-0.58778	0.0230405	PRP38 family protein
AT3G03828.1	AT3G03828	21	5	10	28	63	71	1.49327	1.63701	0.0231547	unknown protein
AT3G06830.1	AT3G06830	79	269	47	49	54	87	3.14595	-1.55726	0.0232364	Plant invertase/pectin methylesterase inhibitor superfamily
AT1G25340.2	AT1G25340	33	34	27	63	111	120	2.42633	1.09726	0.0232798	myb domain protein 116
AT5G41790.1	AT5G41790	1631	2081	1298	1677	1744	1657	7.18763	-0.524331	0.0232924	COP1-interactive protein 1
AT3G02030.1	AT3G02030	213	265	168	181	181	229	4.17793	-0.670989	0.0233433	transferases, transferring acyl groups other than amino-acyl groups;acyltransferases
AT1G05250.1	AT1G05250	10	45	15	8	11	8	0.660274	-1.90399	0.0234199	Peroxidase superfamily protein
AT1G65440.2	AT1G65440	2673	3333	1988	2711	2524	2825	7.85546	-0.527178	0.0234562	global transcription factor group B1
AT1G67560.1	AT1G67560	1532	1075	1104	1413	1266	996	6.74319	-0.564469	0.0235727	PLAT/LH2 domain-containing lipoxygenase family protein
AT5G16290.1	AT5G16290	769	533	480	1306	1122	1278	6.21474	0.519079	0.0236179	VALINE-TOLERANT 1
AT4G28550.1	AT4G28550	98	83	75	231	231	169	3.59758	0.751297	0.0236592	Ypt/Rab-GAP domain of gyp1p superfamily protein
AT1G70380.1	AT1G70380	0	0	0	2	3	10	-1.42148	5.12179	0.0237831	F-box and associated interaction domains-containing protein
AT2G07180.2	AT2G07180	550	921	334	399	488	584	5.57935	-0.811744	0.0238694	Protein kinase superfamily protein
AT2G07180.1	AT2G07180	551	926	338	400	490	590	5.58797	-0.811434	0.0239019	Protein kinase superfamily protein
AT4G26690.1	AT4G26690	411	350	323	769	712	769	5.50566	0.502028	0.0239019	PLC-like phosphodiesterase family protein
AT2G04080.1	AT2G04080	70	33	55	124	180	164	3.09635	1.00868	0.0239272	MATE efflux family protein
AT5G44400.1	AT5G44400	45	30	36	131	104	87	2.58119	0.979003	0.0240068	FAD-binding Berberine family protein
AT1G52760.1	AT1G52760	553	498	416	974	924	1138	5.9361	0.502745	0.0241055	lysophospholipase 2
AT2G19850.2	AT2G19850	40	67	54	35	20	46	2.01009	-1.2433	0.0244642	unknown protein
AT3G47590.1	AT3G47590	301	216	205	599	530	445	4.96117	0.579451	0.0245123	alpha/beta-Hydrolases superfamily protein
AT4G25990.1	AT4G25990	16	20	6	2	7	7	-0.00314602	-1.8758	0.0245275	CCT motif family protein
AT2G33510.2	AT2G33510	263	321	168	243	248	188	4.37981	-0.677755	0.0245745	unknown protein
AT1G45215.1	AT1G45215	91	16	66	131	252	336	3.56872	1.49414	0.0246306	Protein of unknown function (DUF784)
AT2G05440.4	AT2G05440	0	0	0	0	12	6	-1.2717	5.38103	0.0246306	GLYCINE RICH PROTEIN 9
AT2G05440.5	AT2G05440	0	0	0	0	12	6	-1.2717	5.38103	0.0246306	GLYCINE RICH PROTEIN 9
AT2G05440.6	AT2G05440	0	0	0	0	12	6	-1.2717	5.38103	0.0246306	GLYCINE RICH PROTEIN 9
AT2G05440.7	AT2G05440	0	0	0	0	12	6	-1.2717	5.38103	0.0246306	GLYCINE RICH PROTEIN 9
AT2G05440.8	AT2G05440	0	0	0	0	12	6	-1.2717	5.38103	0.0246306	GLYCINE RICH PROTEIN 9
AT2G05440.1	AT2G05440	0	0	0	0	12	6	-1.2717	5.38103	0.024632	GLYCINE RICH PROTEIN 9
AT2G05440.2	AT2G05440	0	0	0	0	12	6	-1.2717	5.38103	0.024632	GLYCINE RICH PROTEIN 9
AT2G05440.3	AT2G05440	0	0	0	0	12	6	-1.2717	5.38103	0.024632	GLYCINE RICH PROTEIN 9
AT5G22970.1	AT5G22970	22	13	18	36	79	84	1.82842	1.35267	0.024632	unknown protein
AT5G58787.2	AT5G58787	163	142	124	111	149	116	3.56845	-0.736751	0.0247167	RING/U-box superfamily protein
AT1G73607.1	AT1G73607	12	7	5	14	44	66	1.10583	1.84111	0.0247221	low-molecular-weight cysteine-rich 65
AT5G61770.3	AT5G61770	484	592	326	430	431	498	5.31942	-0.577022	0.0247288	PETER PAN-like protein
AT2G43510.1	AT2G43510	11	12	4	31	23	70	1.13314	1.67427	0.0248228	trypsin inhibitor protein 1
AT1G26610.1	AT1G26610	17	12	12	45	57	37	1.37832	1.21081	0.0248814	C2H2-like zinc finger protein
AT5G16000.1	AT5G16000	302	262	218	286	258	220	4.4901	-0.579032	0.0249401	NSP-interacting kinase 1
AT5G58787.1	AT5G58787	185	159	140	131	174	126	3.75025	-0.71412	0.0251044	RING/U-box superfamily protein
AT5G13290.3	AT5G13290	270	329	230	210	291	275	4.55363	-0.643181	0.0251328	Protein kinase superfamily protein
AT1G14290.1	AT1G14290	368	398	280	361	312	375	4.92375	-0.541515	0.0251576	sphingoid base hydroxylase 2
AT3G16520.2	AT3G16520	1421	884	1080	971	1090	1226	6.60473	-0.596696	0.025205	UDP-glucosyl transferase 88A1
AT4G14650.1	AT4G14650	31	45	17	14	25	12	1.16796	-1.38093	0.0252245	unknown protein
AT2G16750.1	AT2G16750	27	32	22	85	89	64	2.1583	1.00529	0.0253365	Protein kinase protein with adenine nucleotide alpha hydrolases-like domain
AT5G28020.5	AT5G28020	64	32	25	116	94	147	2.70768	1.04618	0.02535	cysteine synthase D2
AT5G43440.1	AT5G43440	22	27	19	53	67	101	2.01996	1.15115	0.0253641	2-oxoglutarate (2OG) and Fe(II)-dependent oxygenase superfamily protein
AT4G02940.1	AT4G02940	793	630	729	1795	1730	1281	6.55948	0.589883	0.0253746	oxidoreductase, 2OG-Fe(II) oxygenase family protein
AT4G18360.2	AT4G18360	19	15	19	57	52	58	1.65362	1.09273	0.0253746	Aldolase-type TIM barrel family protein
AT3G14780.1	AT3G14780	111	146	126	96	99	124	3.38908	-0.830966	0.0254183	unknown protein
AT2G14378.1	AT2G14378	45	14	26	65	122	115	2.41241	1.29016	0.0254443	Protein of unknown function (DUF1278)
AT5G07800.1	AT5G07800	69	38	40	180	111	125	2.94231	0.960814	0.0254793	Flavin-binding monooxygenase family protein
AT3G54730.2	AT3G54730	28	52	49	25	12	34	1.64519	-1.44673	0.0255027	unknown protein
AT1G78040.1	AT1G78040	5697	5578	4492	11828	10659	9635	9.34323	0.475734	0.0256573	Pollen Ole e 1 allergen and extensin family protein
ATMG00820.1	ATMG00820	7	8	5	1	2	2	-0.931642	-2.44032	0.0257036	Reverse transcriptase (RNA-dependent DNA polymerase)
AT5G55010.1	AT5G55010	256	366	256	210	262	321	4.62087	-0.702701	0.0257462	unknown protein
AT3G03480.1	AT3G03480	1	0	0	15	4	3	-1.05415	3.56498	0.025892	acetyl CoA:(Z)-3-hexen-1-ol acetyltransferase
AT3G16520.1	AT3G16520	1417	879	1076	968	1088	1221	6.59962	-0.595511	0.025892	UDP-glucosyl transferase 88A1
AT4G23430.2	AT4G23430	221	225	216	522	479	452	4.85211	0.569572	0.025892	NAD(P)-binding Rossmann-fold superfamily protein
AT1G53480.2	AT1G53480	772	791	515	198	211	823	5.64229	-1.28168	0.0259875	mto 1 responding down 1
AT2G31150.1	AT2G31150	443	385	303	372	349	424	5.04036	-0.522131	0.0259875	ATP binding;ATPases, coupled to transmembrane movement of ions, phosphorylative mechanism
AT5G04190.1	AT5G04190	46	72	86	19	62	30	2.29733	-1.47794	0.0259875	phytochrome kinase substrate 4
AT3G63440.1	AT3G63440	192	293	186	201	220	187	4.23236	-0.695596	0.0259879	cytokinin oxidase/dehydrogenase 6
AT1G03300.1	AT1G03300	106	114	80	198	240	284	3.80036	0.724578	0.0260451	DOMAIN OF UNKNOWN FUNCTION 724 1
AT5G55850.3	AT5G55850	515	503	378	948	1106	840	5.86444	0.508118	0.02612	RPM1-interacting protein 4 (RIN4) family protein
AT3G14660.1	AT3G14660	825	585	537	649	553	742	5.81381	-0.541601	0.0262272	cytochrome P450, family 72, subfamily A, polypeptide 13
AT4G31380.1	AT4G31380	16	27	20	44	74	129	2.10901	1.40728	0.026245	FPF1-like protein 1
AT4G35180.1	AT4G35180	189	534	96	103	104	224	4.2276	-1.42272	0.0262497	LYS/HIS transporter 7
AT1G70850.3	AT1G70850	37	8	32	108	101	87	2.36109	1.36519	0.0264512	MLP-like protein 34
AT1G70850.2	AT1G70850	37	8	32	108	101	87	2.36109	1.36519	0.0264585	MLP-like protein 34
AT1G70850.1	AT1G70850	37	8	32	108	101	87	2.36109	1.36519	0.0264656	MLP-like protein 34
AT4G32610.1	AT4G32610	880	1214	644	814	922	925	6.28726	-0.575885	0.0265451	copper ion binding
AT4G08025.1	AT4G08025	28	6	15	35	87	95	1.89058	1.61019	0.0265679	Protein of unknown function (DUF784)
AT4G13790.1	AT4G13790	68	33	38	19	38	29	1.7807	-1.21949	0.0266052	SAUR-like auxin-responsive protein family
AT5G63380.1	AT5G63380	245	181	191	470	478	405	4.74625	0.579444	0.0267909	AMP-dependent synthetase and ligase family protein
AT5G64190.1	AT5G64190	0	1	0	8	2	9	-1.17937	3.35447	0.0268141	unknown protein
AT2G31670.1	AT2G31670	692	553	498	1193	1280	1093	6.17318	0.486735	0.0268351	Stress responsive alpha-beta barrel domain protein
AT5G07770.2	AT5G07770	340	344	306	687	775	640	5.39804	0.528002	0.0268351	Actin-binding FH2 protein
AT5G48140.1	AT5G48140	404	1632	223	117	217	557	5.58669	-1.83262	0.0268431	Pectin lyase-like superfamily protein
AT4G24220.1	AT4G24220	619	568	474	1148	1101	1103	6.09329	0.464564	0.026859	NAD(P)-binding Rossmann-fold superfamily protein
AT1G23080.2	AT1G23080	498	334	404	441	417	337	5.15141	-0.608957	0.0270578	Auxin efflux carrier family protein
AT1G57777.1	AT1G57777	42	18	25	49	126	146	2.47586	1.38056	0.0270578	Protein of unknown function (DUF784)
AT5G55980.1	AT5G55980	7	13	3	1	0	4	-0.818392	-2.61771	0.0270659	serine-rich protein-related
AT2G29620.1	AT2G29620	4	17	1	0	2	1	-0.930967	-3.19465	0.0270949	unknown protein
AT4G33920.1	AT4G33920	264	312	200	425	657	700	5.11244	0.660202	0.0270949	Protein phosphatase 2C family protein
AT3G05030.2	AT3G05030	385	348	270	704	671	670	5.37476	0.485645	0.0271301	sodium hydrogen exchanger 2
AT1G45221.1	AT1G45221	103	18	74	141	285	376	3.72595	1.47998	0.0271932	Bifunctional inhibitor/lipid-transfer protein/seed storage 2S albumin superfamily protein
AT2G24600.2	AT2G24600	11	11	2	25	25	61	0.985798	1.69817	0.0271932	Ankyrin repeat family protein
AT2G31160.1	AT2G31160	103	103	92	79	99	69	3.02036	-0.826327	0.0271932	Protein of unknown function (DUF640)
AT3G01540.1	AT3G01540	2625	2598	2097	2417	2562	2746	7.76281	-0.471985	0.0271932	DEAD box RNA helicase 1
AT2G31790.1	AT2G31790	395	267	278	687	597	745	5.33287	0.563218	0.0272861	UDP-Glycosyltransferase superfamily protein
AT2G33510.1	AT2G33510	298	347	192	283	281	212	4.54953	-0.641163	0.0273066	unknown protein
AT3G02670.1	AT3G02670	5	1	2	7	18	32	0.0695496	2.26546	0.0273369	Glycine-rich protein family
AT5G15840.2	AT5G15840	54	70	59	47	48	45	2.28694	-0.948217	0.0273369	B-box type zinc finger protein with CCT domain
AT5G61770.2	AT5G61770	490	580	321	438	430	493	5.31272	-0.562443	0.0273378	PETER PAN-like protein
AT4G25750.1	AT4G25750	32	37	24	16	25	19	1.24874	-1.16784	0.027372	ABC-2 type transporter family protein
AT5G49280.1	AT5G49280	140	192	106	305	372	333	4.29711	0.666342	0.0273753	hydroxyproline-rich glycoprotein family protein
AT5G57010.1	AT5G57010	1	2	0	5	9	17	-0.662423	2.72163	0.0273753	calmodulin-binding family protein
AT1G15100.1	AT1G15100	218	192	158	168	182	191	4.0167	-0.613626	0.0273906	RING-H2 finger A2A
AT2G33435.1	AT2G33435	292	440	269	301	301	343	4.82961	-0.632891	0.0275247	RNA-binding (RRM/RBD/RNP motifs) family protein
AT4G39980.1	AT4G39980	710	500	383	1116	1076	1080	6.03832	0.512712	0.0275281	3-deoxy-D-arabino-heptulosonate 7-phosphate synthase 1
AT1G21722.1	AT1G21722	7	3	3	1	0	0	-1.44721	-3.73634	0.0275512	unknown protein
AT1G58170.1	AT1G58170	38	33	24	97	81	83	2.31065	0.916984	0.0275512	Disease resistance-responsive (dirigent-like protein) family protein
AT3G10890.1	AT3G10890	12	4	3	15	35	43	0.745722	1.76958	0.0275512	Glycosyl hydrolase superfamily protein
AT4G20970.1	AT4G20970	23	24	23	67	66	74	1.96884	1.00487	0.0275512	basic helix-loop-helix (bHLH) DNA-binding superfamily protein
AT4G30190.2	AT4G30190	3483	2482	2219	2912	3046	1841	7.85491	-0.608685	0.0275512	H(+)-ATPase 2
AT5G54145.1	AT5G54145	20	8	23	54	60	79	1.78792	1.33577	0.0275512	unknown protein
AT2G19850.1	AT2G19850	54	91	89	53	26	68	2.55042	-1.26135	0.0276113	unknown protein
AT5G66400.1	AT5G66400	14	15	19	97	26	96	1.89699	1.59974	0.0276113	Dehydrin family protein
AT1G25340.1	AT1G25340	50	49	37	80	162	164	2.89184	1.0364	0.0276679	myb domain protein 116
AT2G04400.1	AT2G04400	373	360	271	658	689	706	5.37973	0.489214	0.027759	Aldolase-type TIM barrel family protein
AT1G49715.1	AT1G49715	9	4	5	12	32	53	0.78077	1.88177	0.0278005	Defensin-like (DEFL) family protein
AT1G62180.1	AT1G62180	997	758	521	1818	1520	1399	6.56022	0.5343	0.0278211	5'adenylylphosphosulfate reductase 2
AT4G33550.1	AT4G33550	14	4	9	62	26	31	1.09074	1.57805	0.0278476	Bifunctional inhibitor/lipid-transfer protein/seed storage 2S albumin superfamily protein
AT3G52900.1	AT3G52900	250	312	187	244	236	236	4.41325	-0.605175	0.0280111	Family of unknown function (DUF662)
AT2G21130.1	AT2G21130	345	307	234	660	575	585	5.20201	0.497898	0.0280774	Cyclophilin-like peptidyl-prolyl cis-trans isomerase family protein
AT2G22930.1	AT2G22930	23	22	19	43	73	110	2.02106	1.27032	0.0281596	UDP-Glycosyltransferase superfamily protein
AT2G36810.1	AT2G36810	1245	1366	1090	1247	1240	1388	6.7775	-0.488715	0.028227	ARM repeat superfamily protein
AT5G04370.2	AT5G04370	6	1	3	19	12	24	0.0720129	1.88887	0.0282775	S-adenosyl-L-methionine-dependent methyltransferases superfamily protein
AT3G52620.1	AT3G52620	16	42	4	3	9	7	0.41851	-2.16677	0.0282925	unknown protein
AT2G17040.1	AT2G17040	2	1	2	4	15	33	-0.087232	2.75742	0.0283109	NAC domain containing protein 36
AT2G27315.1	AT2G27315	31	13	32	44	144	142	2.47574	1.53777	0.0283817	Protein of unknown function (DUF1278)
AT5G60200.1	AT5G60200	374	391	225	323	328	319	4.82192	-0.557801	0.0283817	TARGET OF MONOPTEROS 6
AT1G28620.1	AT1G28620	19	30	10	7	14	8	0.517308	-1.53207	0.0284036	pseudogene
AT3G48500.1	AT3G48500	1032	758	567	830	756	805	6.09004	-0.505356	0.0284036	Nucleic acid-binding, OB-fold-like protein
AT5G58670.1	AT5G58670	11	4	3	19	33	26	0.55302	1.58052	0.0284036	phospholipase C1
ATCG00490.1	ATCG00490	306	264	244	632	559	522	5.10647	0.520336	0.0284036	ribulose-bisphosphate carboxylases
AT1G14890.1	AT1G14890	948	741	697	715	833	901	6.12884	-0.509055	0.0284172	Plant invertase/pectin methylesterase inhibitor superfamily protein
AT5G04885.1	AT5G04885	1756	1321	1280	1675	1474	1369	7.00194	-0.497189	0.0284172	Glycosyl hydrolase family protein
AT4G17520.1	AT4G17520	4040	4039	2435	3701	3661	3438	8.25465	-0.488778	0.0284661	Hyaluronan / mRNA binding family
AT1G70500.1	AT1G70500	109	53	76	186	237	206	3.56056	0.852762	0.028541	Pectin lyase-like superfamily protein
AT4G04030.1	AT4G04030	26	41	40	22	11	29	1.40531	-1.36515	0.0286441	ovate family protein 9
AT4G26940.1	AT4G26940	519	470	409	1018	1064	819	5.86994	0.501789	0.0287889	Galactosyltransferase family protein
AT4G24640.1	AT4G24640	405	1442	120	63	154	424	5.31681	-2.0887	0.0288293	Plant invertase/pectin methylesterase inhibitor superfamily protein
AT2G46450.2	AT2G46450	409	214	180	193	252	240	4.4338	-0.740589	0.0288346	cyclic nucleotide-gated channel 12
AT2G41820.1	AT2G41820	1407	1271	1255	1563	1299	1207	6.86097	-0.51484	0.0288442	Leucine-rich repeat protein kinase family protein
AT4G14990.1	AT4G14990	660	589	661	627	659	663	5.81848	-0.542426	0.0288741	Topoisomerase II-associated protein PAT1
AT5G19240.1	AT5G19240	36	43	6	53	120	193	2.60311	1.63349	0.0288814	Glycoprotein membrane precursor GPI-anchored
AT3G16560.1	AT3G16560	220	185	172	369	434	451	4.64291	0.570392	0.0289466	Protein phosphatase 2C family protein
AT3G16520.3	AT3G16520	1737	1158	1314	1189	1346	1613	6.9266	-0.573374	0.0290141	UDP-glucosyl transferase 88A1
AT5G67160.1	AT5G67160	279	222	224	480	575	505	4.96176	0.552256	0.0290286	HXXXD-type acyl-transferase family protein
AT2G25790.1	AT2G25790	89	82	66	178	180	211	3.46477	0.718501	0.0290829	Leucine-rich receptor-like protein kinase family protein
AT1G53300.1	AT1G53300	391	357	309	761	718	689	5.45875	0.485443	0.0291521	tetratricopetide-repeat thioredoxin-like 1
AT5G56220.1	AT5G56220	348	352	288	348	355	302	4.85524	-0.527439	0.0291949	P-loop containing nucleoside triphosphate hydrolases superfamily protein
AT1G04990.2	AT1G04990	286	201	187	541	512	410	4.85805	0.576197	0.0292081	Zinc finger C-x8-C-x5-C-x3-H type family protein
AT5G18270.2	AT5G18270	7	12	8	24	45	36	0.968525	1.39905	0.0293032	Arabidopsis NAC domain containing protein 87
AT1G51355.1	AT1G51355	72	74	60	55	64	42	2.45958	-0.905082	0.0293466	unknown protein
AT1G76360.1	AT1G76360	15	15	12	26	58	89	1.60983	1.49362	0.029362	Protein kinase superfamily protein
AT3G19000.2	AT3G19000	477	473	398	465	437	496	5.31511	-0.500332	0.0293671	2-oxoglutarate (2OG) and Fe(II)-dependent oxygenase superfamily protein
AT1G53480.1	AT1G53480	628	605	406	161	157	653	5.29846	-1.28157	0.0294325	mto 1 responding down 1
AT1G76040.2	AT1G76040	176	176	119	328	314	389	4.3538	0.592535	0.0294861	calcium-dependent protein kinase 29
AT5G08750.1	AT5G08750	451	469	408	380	471	489	5.28099	-0.544034	0.0294861	RING/FYVE/PHD zinc finger superfamily protein
AT5G62470.1	AT5G62470	262	116	201	549	484	432	4.78509	0.776959	0.0296044	myb domain protein 96
AT2G46950.1	AT2G46950	5	1	4	18	21	13	0.0180507	1.79747	0.0296347	cytochrome P450, family 709, subfamily B, polypeptide 2
AT1G08570.2	AT1G08570	839	647	644	651	820	708	5.96545	-0.518106	0.0297277	atypical CYS HIS rich thioredoxin 4
AT1G77670.1	AT1G77670	1268	1077	758	1167	1118	829	6.48194	-0.52613	0.0297718	Pyridoxal phosphate (PLP)-dependent transferases superfamily protein
AT5G54680.1	AT5G54680	1219	1252	939	1138	1218	1246	6.6595	-0.466728	0.0299452	basic helix-loop-helix (bHLH) DNA-binding superfamily protein
AT5G56530.1	AT5G56530	635	692	464	646	625	598	5.72054	-0.479857	0.0301133	Protein of Unknown Function (DUF239)
AT2G38530.1	AT2G38530	7269	6913	4315	3700	1262	6672	8.8156	-1.19396	0.0301457	lipid transfer protein 2
AT5G07500.1	AT5G07500	0	0	0	3	2	9	-1.47527	5.02362	0.0301478	Zinc finger C-x8-C-x5-C-x3-H type family protein
AT5G27980.1	AT5G27980	31	147	14	14	19	32	1.99029	-2.04541	0.0301532	Seed maturation protein
AT4G04570.1	AT4G04570	39	40	8	13	6	18	0.964998	-1.70309	0.0301804	cysteine-rich RLK (RECEPTOR-like protein kinase) 40
AT4G35310.1	AT4G35310	823	782	583	1472	1426	1460	6.4757	0.452537	0.0301934	calmodulin-domain protein kinase 5
AT5G57790.1	AT5G57790	221	215	210	503	436	466	4.8088	0.557763	0.0302666	unknown protein
AT4G02860.1	AT4G02860	83	71	69	160	192	197	3.40511	0.746946	0.0304202	Phenazine biosynthesis PhzC/PhzF protein
AT2G37010.1	AT2G37010	8	49	5	2	5	8	0.363103	-2.51294	0.0304505	non-intrinsic ABC protein 12
AT3G06890.1	AT3G06890	31	47	19	72	103	121	2.44014	1.0812	0.0304505	unknown protein
AT5G13290.2	AT5G13290	312	370	254	252	334	323	4.74801	-0.58759	0.0304669	Protein kinase superfamily protein
AT1G63460.1	AT1G63460	204	234	153	482	417	380	4.66824	0.569933	0.0304992	glutathione peroxidase 8
AT3G24900.1	AT3G24900	23	18	13	12	5	12	0.440444	-1.41794	0.0306404	receptor like protein 39
AT1G20470.1	AT1G20470	192	183	151	133	182	169	3.88937	-0.666917	0.0306728	SAUR-like auxin-responsive protein family
AT1G52770.1	AT1G52770	8	4	2	30	13	23	0.323173	1.69122	0.0308605	Phototropic-responsive NPH3 family protein
AT3G50310.1	AT3G50310	42	117	36	19	33	48	2.17484	-1.48495	0.0309229	mitogen-activated protein kinase kinase kinase 20
AT5G07220.1	AT5G07220	118	97	117	288	281	233	3.95483	0.703106	0.0310646	BCL-2-associated athanogene 3
AT3G06437.1	AT3G06437	102	93	61	83	52	67	2.76298	-0.873684	0.0310663	pseudogene
AT1G04580.1	AT1G04580	42	23	18	93	72	77	2.17748	1.01755	0.0310708	aldehyde oxidase 4
AT1G78040.2	AT1G78040	5401	5364	4266	11055	10137	9140	9.2663	0.462301	0.0312247	Pollen Ole e 1 allergen and extensin family protein
AT3G05200.1	AT3G05200	206	212	171	145	193	208	4.0577	-0.658475	0.031234	RING/U-box superfamily protein
AT2G46450.3	AT2G46450	399	212	178	192	248	239	4.41391	-0.728901	0.0313747	cyclic nucleotide-gated channel 12
AT4G32410.1	AT4G32410	2245	1810	1820	4405	4016	3706	7.93398	0.488033	0.0313747	cellulose synthase 1
AT5G58050.1	AT5G58050	216	749	143	96	156	306	4.65165	-1.49207	0.0313747	SHV3-like 4
AT4G05590.1	AT4G05590	28	35	29	80	95	86	2.30374	0.945506	0.0314	unknown protein
AT4G18960.1	AT4G18960	892	789	679	1591	1902	1400	6.62159	0.503368	0.031473	K-box region and MADS-box transcription factor family protein
AT5G15110.1	AT5G15110	222	959	109	55	107	304	4.74724	-1.95385	0.031473	Pectate lyase family protein
AT3G19000.1	AT3G19000	496	497	411	478	471	517	5.37747	-0.489611	0.0317047	2-oxoglutarate (2OG) and Fe(II)-dependent oxygenase superfamily protein
AT3G46540.1	AT3G46540	257	207	160	514	433	386	4.73154	0.557829	0.0317047	ENTH/VHS family protein
AT1G09500.1	AT1G09500	0	1	1	4	7	16	-0.824857	3.02174	0.0317338	NAD(P)-binding Rossmann-fold superfamily protein
AT5G05730.1	AT5G05730	264	221	170	437	414	555	4.80733	0.565753	0.0317338	anthranilate synthase alpha subunit 1
ATMG00180.1	ATMG00180	32	105	31	23	27	37	1.96894	-1.47533	0.0317338	cytochrome C biogenesis 452
AT4G28000.1	AT4G28000	42	150	23	6	17	45	2.13435	-2.14767	0.0318086	P-loop containing nucleoside triphosphate hydrolases superfamily protein
AT3G16390.1	AT3G16390	3	2	4	14	18	16	-0.0799563	1.82634	0.0319221	nitrile specifier protein 3
AT1G72960.1	AT1G72960	12	17	19	3	10	10	0.258001	-1.62027	0.0319223	Root hair defective 3 GTP-binding protein (RHD3)
AT2G44300.1	AT2G44300	139	82	108	342	261	223	3.97113	0.769063	0.031929	Bifunctional inhibitor/lipid-transfer protein/seed storage 2S albumin superfamily protein
AT3G01540.2	AT3G01540	2624	2628	2114	2442	2601	2777	7.77573	-0.463819	0.0319322	DEAD box RNA helicase 1
AT3G52600.1	AT3G52600	165	722	91	53	104	231	4.3796	-1.82336	0.0319453	cell wall invertase 2
AT5G47600.1	AT5G47600	35	82	29	33	32	17	1.80528	-1.36288	0.0320915	HSP20-like chaperones superfamily protein
AT1G61810.1	AT1G61810	38	23	9	63	55	155	2.23312	1.47538	0.0321106	beta-glucosidase 45
AT1G69040.1	AT1G69040	1588	1594	1015	1482	1522	1370	6.94186	-0.472633	0.0321109	ACT domain repeat 4
AT1G43600.1	AT1G43600	5	2	3	0	0	0	-1.68961	-5.07591	0.0321324	Haloacid dehalogenase-like hydrolase (HAD) superfamily protein
AT3G01540.3	AT3G01540	2563	2598	2086	2393	2563	2732	7.75215	-0.465434	0.032193	DEAD box RNA helicase 1
AT4G29930.4	AT4G29930	2	3	5	26	18	11	0.0747723	1.8549	0.032193	basic helix-loop-helix (bHLH) DNA-binding superfamily protein
AT5G07660.1	AT5G07660	171	184	119	364	299	377	4.36458	0.594313	0.032193	structural maintenance of chromosomes 6A
AT3G17060.1	AT3G17060	197	885	123	71	122	299	4.69297	-1.78624	0.0322033	Pectin lyase-like superfamily protein
AT3G54730.3	AT3G54730	25	46	38	22	10	29	1.41353	-1.41	0.0322033	unknown protein
AT5G52060.1	AT5G52060	356	264	273	646	666	576	5.24355	0.527863	0.0322033	BCL-2-associated athanogene 1
AT1G48570.1	AT1G48570	407	372	219	340	295	337	4.82643	-0.561146	0.0322793	zinc finger (Ran-binding) family protein
AT3G08490.1	AT3G08490	3	7	8	27	34	20	0.598095	1.58085	0.0322793	unknown protein
AT3G19550.1	AT3G19550	1388	1566	980	2038	3099	3887	7.4425	0.664342	0.0323226	unknown protein
AT2G17240.1	AT2G17240	688	735	417	580	608	664	5.7302	-0.517507	0.0324257	unknown protein
AT1G01060.4	AT1G01060	944	742	1916	1103	926	669	6.61505	-1.06906	0.0324569	Homeodomain-like superfamily protein
AT4G25990.2	AT4G25990	18	22	6	1	9	7	0.0983461	-1.91115	0.0324569	CCT motif family protein
AT5G05210.2	AT5G05210	828	866	528	752	716	814	6.01617	-0.492823	0.0324578	Surfeit locus protein 6
AT1G29670.1	AT1G29670	1844	1377	1392	1238	1405	1892	7.05612	-0.573965	0.0325049	GDSL-like Lipase/Acylhydrolase superfamily protein
AT4G24220.2	AT4G24220	599	547	453	1085	1052	1067	6.03233	0.455324	0.0325331	NAD(P)-binding Rossmann-fold superfamily protein
AT4G32510.1	AT4G32510	107	445	66	26	62	146	3.70556	-1.89427	0.0325366	HCO3- transporter family
AT1G58460.1	AT1G58460	5	3	5	33	11	25	0.35549	1.82457	0.0326248	unknown protein
AT1G69040.2	AT1G69040	1598	1606	1030	1502	1540	1379	6.95603	-0.47053	0.0327137	ACT domain repeat 4
AT5G61770.1	AT5G61770	488	585	325	428	437	509	5.32328	-0.556506	0.0327339	PETER PAN-like protein
AT2G36325.1	AT2G36325	65	23	31	76	149	173	2.81362	1.21987	0.0328227	GDSL-like Lipase/Acylhydrolase superfamily protein
AT3G16120.1	AT3G16120	35	54	30	28	28	26	1.62102	-1.07829	0.0328498	Dynein light chain type 1 family protein
AT5G40010.1	AT5G40010	3	12	5	30	35	21	0.682154	1.53815	0.0328498	AAA-ATPase 1
AT5G59550.1	AT5G59550	244	258	190	321	666	779	5.04676	0.810008	0.0328629	zinc finger (C3HC4-type RING finger) family protein
AT2G11910.2	AT2G11910	2003	2575	1189	1932	1772	1840	7.34611	-0.57904	0.0328901	unknown protein
AT4G22780.1	AT4G22780	286	405	201	159	223	339	4.56843	-0.835262	0.0328901	ACT domain repeat 7
AT1G22990.1	AT1G22990	34	34	33	18	14	32	1.35971	-1.21186	0.0329024	Heavy metal transport/detoxification superfamily protein
AT4G32170.1	AT4G32170	111	131	88	201	271	328	3.94303	0.734379	0.0329024	cytochrome P450, family 96, subfamily A, polypeptide 2
AT4G18960.2	AT4G18960	855	753	643	1503	1807	1337	6.54956	0.498163	0.0329318	K-box region and MADS-box transcription factor family protein
AT1G14170.3	AT1G14170	182	158	136	358	345	320	4.35594	0.556391	0.0330079	RNA-binding KH domain-containing protein
AT1G30710.1	AT1G30710	150	527	61	34	65	178	3.95059	-1.89457	0.0330278	FAD-binding Berberine family protein
AT1G57760.1	AT1G57760	25	8	21	37	82	109	1.97657	1.51189	0.0330664	Protein of unknown function (DUF784)
AT5G13740.1	AT5G13740	576	594	473	972	1116	1373	6.11654	0.525355	0.0331332	zinc induced facilitator 1
AT4G35060.1	AT4G35060	74	96	60	11	24	73	2.38132	-1.62389	0.0331483	Heavy metal transport/detoxification superfamily protein
AT1G71830.1	AT1G71830	1422	1343	1009	997	1241	1529	6.76961	-0.541645	0.0332309	somatic embryogenesis receptor-like kinase 1
AT2G38820.1	AT2G38820	207	181	174	200	160	175	4.00686	-0.627173	0.0332423	Protein of unknown function (DUF506)
AT5G10100.1	AT5G10100	29	26	26	69	62	148	2.31864	1.22699	0.033353	Haloacid dehalogenase-like hydrolase (HAD) superfamily protein
AT1G78476.1	AT1G78476	70	87	67	57	70	52	2.5935	-0.878239	0.0333908	unknown protein
AT3G48780.1	AT3G48780	716	822	501	626	718	736	5.89168	-0.506771	0.0334125	serine palmitoyltransferase 1
AT1G07900.1	AT1G07900	0	0	0	6	2	5	-1.5316	4.91637	0.0335797	LOB domain-containing protein 1
AT4G26940.2	AT4G26940	449	404	372	893	915	734	5.68201	0.497815	0.0336936	Galactosyltransferase family protein
AT3G33004.1	AT3G33004	18	34	15	12	8	16	0.724622	-1.4249	0.0337738	pseudogene
AT3G56360.1	AT3G56360	280	219	94	180	52	142	3.83254	-1.1599	0.0338302	unknown protein
AT5G11950.2	AT5G11950	27	25	22	15	16	17	0.944553	-1.16592	0.0338302	Putative lysine decarboxylase family protein
AT1G21250.1	AT1G21250	349	264	127	592	631	467	5.02102	0.690924	0.0340395	cell wall-associated kinase
AT4G18830.1	AT4G18830	35	45	36	13	30	31	1.55455	-1.20032	0.0340876	ovate family protein 5
AT4G23430.1	AT4G23430	209	209	199	471	443	419	4.73719	0.548844	0.0342203	NAD(P)-binding Rossmann-fold superfamily protein
AT1G01060.2	AT1G01060	947	738	1914	1100	938	673	6.61645	-1.06068	0.0342555	Homeodomain-like superfamily protein
AT3G14680.1	AT3G14680	7	6	5	25	29	19	0.490253	1.46052	0.0343051	cytochrome P450, family 72, subfamily A, polypeptide 14
AT1G78480.1	AT1G78480	79	98	76	69	79	57	2.77443	-0.859582	0.0343223	Prenyltransferase family protein
AT2G47600.1	AT2G47600	499	434	359	821	915	860	5.72745	0.462928	0.0346403	magnesium/proton exchanger
AT5G58320.1	AT5G58320	98	90	71	200	190	212	3.56009	0.672606	0.0346403	Kinase interacting (KIP1-like) family protein
AT4G30610.1	AT4G30610	157	134	71	318	220	318	4.03854	0.725126	0.034698	alpha/beta-Hydrolases superfamily protein
AT1G01060.1	AT1G01060	954	745	1926	1113	944	678	6.62748	-1.05822	0.0346992	Homeodomain-like superfamily protein
AT4G21930.1	AT4G21930	78	77	96	205	200	247	3.62986	0.797037	0.0347041	Protein of unknown function, DUF584
AT5G19900.1	AT5G19900	733	658	526	726	674	639	5.83144	-0.455077	0.034812	PRLI-interacting factor, putative
AT5G56530.2	AT5G56530	634	697	467	655	628	606	5.73051	-0.47058	0.0348842	Protein of Unknown Function (DUF239)
AT3G52600.2	AT3G52600	160	697	87	50	100	226	4.32961	-1.81705	0.0350298	cell wall invertase 2
AT2G19780.1	AT2G19780	123	78	104	292	244	217	3.85086	0.740786	0.0351681	Leucine-rich repeat (LRR) family protein
AT4G30074.1	AT4G30074	7	1	4	7	31	48	0.5734	2.27871	0.0353155	low-molecular-weight cysteine-rich 19
AT1G28130.2	AT1G28130	227	276	318	218	245	284	4.54751	-0.726741	0.0354148	Auxin-responsive GH3 family protein
AT1G76020.1	AT1G76020	108	95	127	260	334	244	3.99676	0.763193	0.0356555	Thioredoxin superfamily protein
AT2G23260.1	AT2G23260	0	0	0	4	7	2	-1.53133	4.91778	0.0357497	UDP-glucosyl transferase 84B1
AT3G61070.2	AT3G61070	432	371	299	922	786	614	5.53661	0.531453	0.0357497	peroxin 11E
AT3G28820.1	AT3G28820	154	698	79	46	86	220	4.29126	-1.8895	0.035784	Protein of unknown function (DUF1216)
AT1G74970.1	AT1G74970	1792	1499	1180	1441	1509	1736	7.04033	-0.468902	0.0359263	ribosomal protein S9
ATMG01180.1	ATMG01180	4	5	3	0	1	1	-1.44767	-2.87369	0.0360025	unknown protein
AT4G35000.1	AT4G35000	1588	1369	1082	1478	1433	1417	6.90816	-0.440486	0.0361832	ascorbate peroxidase 3
AT5G50130.1	AT5G50130	109	108	96	257	220	243	3.8229	0.645813	0.0361832	NAD(P)-binding Rossmann-fold superfamily protein
AT3G27400.1	AT3G27400	165	161	134	334	328	328	4.31025	0.555272	0.0362283	Pectin lyase-like superfamily protein
AT5G64330.2	AT5G64330	427	470	372	378	507	395	5.21244	-0.5407	0.0362283	Phototropic-responsive NPH3 family protein
AT1G04990.1	AT1G04990	299	219	198	573	533	423	4.93043	0.552161	0.0363563	Zinc finger C-x8-C-x5-C-x3-H type family protein
AT1G67950.4	AT1G67950	229	242	162	445	463	414	4.73539	0.522192	0.0363994	RNA-binding (RRM/RBD/RNP motifs) family protein
AT1G76160.1	AT1G76160	1337	1401	883	2458	2225	2605	7.20648	0.475306	0.0363994	SKU5 similar 5
AT5G62470.2	AT5G62470	279	124	225	599	521	464	4.89986	0.767534	0.0363994	myb domain protein 96
AT3G19010.3	AT3G19010	376	332	194	594	622	653	5.22792	0.53044	0.0367512	2-oxoglutarate (2OG) and Fe(II)-dependent oxygenase superfamily protein
AT1G23030.1	AT1G23030	338	308	239	497	745	653	5.23891	0.558418	0.0368603	ARM repeat superfamily protein
AT3G50690.1	AT3G50690	704	685	510	641	662	712	5.81645	-0.456477	0.036867	Leucine-rich repeat (LRR) family protein
AT5G55620.1	AT5G55620	11	6	5	32	21	30	0.670375	1.36902	0.0369383	unknown protein
AT1G56600.1	AT1G56600	0	1	0	2	7	9	-1.2234	3.28314	0.0369678	galactinol synthase 2
AT2G35760.1	AT2G35760	240	266	217	491	554	486	4.94473	0.526634	0.0369678	Uncharacterised protein family (UPF0497)
AT3G03170.1	AT3G03170	7	15	11	38	41	38	1.1394	1.25807	0.0369741	unknown protein
AT4G31020.1	AT4G31020	153	230	105	115	141	149	3.7137	-0.797597	0.0369741	alpha/beta-Hydrolases superfamily protein
AT5G50670.1	AT5G50670	207	259	128	419	385	531	4.70426	0.64095	0.0371372	Squamosa promoter-binding protein-like (SBP domain) transcription factor family protein
AT1G18210.1	AT1G18210	1546	2036	1155	1471	1722	1572	7.09924	-0.528869	0.0371688	Calcium-binding EF-hand family protein
AT4G15920.1	AT4G15920	105	66	79	205	205	197	3.55215	0.727491	0.0372135	Nodulin MtN3 family protein
AT5G23860.1	AT5G23860	594	578	482	1093	1100	1123	6.08346	0.452139	0.037253	tubulin beta 8
AT5G05210.1	AT5G05210	848	872	541	777	737	831	6.04736	-0.479038	0.0372694	Surfeit locus protein 6
AT2G39855.1	AT2G39855	25	54	64	2	35	12	1.62757	-2.15157	0.0373128	unknown protein
AT3G45970.1	AT3G45970	42	97	40	133	147	311	3.37432	1.18449	0.0373128	expansin-like A1
AT2G38250.1	AT2G38250	4	15	3	27	32	33	0.773653	1.51908	0.0374267	Homeodomain-like superfamily protein
AT2G41800.1	AT2G41800	9	10	5	28	20	45	0.80922	1.40979	0.0375606	Protein of unknown function, DUF642
AT1G19380.1	AT1G19380	34	38	6	49	107	153	2.39726	1.5091	0.0378596	Protein of unknown function (DUF1195)
AT3G46520.1	AT3G46520	51	247	27	16	38	63	2.76111	-1.96009	0.0378596	actin-12
AT2G26040.1	AT2G26040	2	7	6	1	2	0	-1.23416	-2.72554	0.0379043	PYR1-like 2
AT1G28305.1	AT1G28305	7	31	4	1	2	7	-0.125251	-2.52326	0.0380211	Plant self-incompatibility protein S1 family
AT3G08630.1	AT3G08630	201	164	143	363	338	380	4.43947	0.544942	0.0380238	Protein of unknown function (DUF3411)
AT5G52640.1	AT5G52640	71	568	52	85	69	113	3.86931	-1.86801	0.038172	heat shock protein 90.1
AT1G68810.1	AT1G68810	350	300	226	338	290	229	4.64905	-0.569779	0.0381941	basic helix-loop-helix (bHLH) DNA-binding superfamily protein
AT3G59930.1	AT3G59930	10	4	7	3	1	3	-0.819227	-2.06465	0.0382653	unknown protein
AT3G08640.1	AT3G08640	636	531	444	1187	1025	1017	6.04073	0.459351	0.0383227	Protein of unknown function (DUF3411)
AT4G24680.1	AT4G24680	1395	1118	792	1124	1071	1224	6.59	-0.47747	0.038421	modifier of snc1
AT4G29950.2	AT4G29950	217	240	200	468	468	455	4.80796	0.524797	0.0384396	Ypt/Rab-GAP domain of gyp1p superfamily protein
AT5G51480.1	AT5G51480	78	101	54	129	186	424	3.7043	1.136	0.0384396	SKU5 similar 2
AT1G61290.1	AT1G61290	36	89	18	12	19	34	1.68142	-1.63304	0.0385021	syntaxin of plants 124
AT2G46260.1	AT2G46260	879	1147	727	755	958	1033	6.31717	-0.547995	0.0385467	BTB/POZ/Kelch-associated protein
AT2G45950.1	AT2G45950	288	425	223	226	288	335	4.70375	-0.676908	0.0386521	SKP1-like 20
AT5G18407.1	AT5G18407	4	2	2	6	16	31	-0.00437635	2.15634	0.0386644	Defensin-like (DEFL) family protein
AT2G37540.1	AT2G37540	12	1	2	19	22	37	0.508117	1.8612	0.0389504	NAD(P)-binding Rossmann-fold superfamily protein
AT5G09805.1	AT5G09805	2	0	3	9	10	18	-0.430553	2.26047	0.0390722	inflorescence deficient in abscission (IDA)-like 3
AT2G17080.1	AT2G17080	1	1	3	13	12	9	-0.511154	2.13804	0.0391513	Arabidopsis protein of unknown function (DUF241)
AT2G19190.1	AT2G19190	18	33	19	4	21	5	0.698486	-1.75775	0.0391543	FLG22-induced receptor-like kinase 1
AT5G55170.1	AT5G55170	61	64	42	33	53	39	2.13498	-0.952687	0.0392519	small ubiquitin-like modifier 3
AT5G28910.2	AT5G28910	20	15	11	51	50	40	1.43079	1.0749	0.0392528	unknown protein
AT3G05858.1	AT3G05858	29	34	28	77	89	85	2.26132	0.907769	0.0392558	unknown protein
AT3G24068.1	AT3G24068	0	0	0	0	8	6	-1.47484	5.0271	0.0392652	Plant self-incompatibility protein S1 family
AT3G28810.1	AT3G28810	296	1297	153	92	159	438	5.21274	-1.8286	0.0392652	Protein of unknown function (DUF1216)
AT4G06534.1	AT4G06534	2	1	2	18	10	8	-0.459442	2.22782	0.0393273	unknown protein
AT1G78660.1	AT1G78660	431	387	298	719	750	762	5.51132	0.458882	0.0396761	gamma-glutamyl hydrolase 1
AT2G46270.2	AT2G46270	441	481	465	883	1021	1066	5.89484	0.529167	0.0397144	G-box binding factor 3
AT5G58660.1	AT5G58660	35	32	37	24	12	30	1.40302	-1.21983	0.0397598	2-oxoglutarate (2OG) and Fe(II)-dependent oxygenase superfamily protein
AT5G58900.1	AT5G58900	138	123	66	267	217	269	3.87196	0.683208	0.0397598	Homeodomain-like transcriptional regulator
AT5G54860.1	AT5G54860	79	103	68	200	195	201	3.53453	0.704344	0.0397907	Major facilitator superfamily protein
AT3G49550.1	AT3G49550	202	159	168	398	353	404	4.5244	0.569922	0.0399138	unknown protein
AT4G37470.1	AT4G37470	228	177	157	340	397	506	4.61775	0.604214	0.0402222	alpha/beta-Hydrolases superfamily protein
AT1G66400.1	AT1G66400	6	14	10	23	46	53	1.15319	1.45336	0.0403067	calmodulin like 23
AT2G38820.2	AT2G38820	242	204	202	238	194	204	4.22954	-0.583548	0.0404013	Protein of unknown function (DUF506)
AT1G79840.1	AT1G79840	30	32	28	16	21	25	1.24123	-1.08601	0.0404246	HD-ZIP IV family of homeobox-leucine zipper protein with lipid-binding START domain
AT1G17300.1	AT1G17300	3	6	5	0	1	2	-1.28575	-2.61292	0.0404501	unknown protein
AT4G20830.1	AT4G20830	288	385	141	478	656	866	5.23056	0.78934	0.0404501	FAD-binding Berberine family protein
AT1G01800.1	AT1G01800	595	483	456	1144	1061	924	5.98855	0.476637	0.0404774	NAD(P)-binding Rossmann-fold superfamily protein
AT2G43820.1	AT2G43820	16	12	17	53	38	60	1.49613	1.17797	0.0405141	UDP-glucosyltransferase 74F2
AT2G21940.1	AT2G21940	282	251	223	223	228	293	4.45068	-0.572498	0.0405238	shikimate kinase 1
AT1G19220.1	AT1G19220	435	395	355	357	424	442	5.1272	-0.506212	0.0405466	auxin response factor 19
AT2G21300.2	AT2G21300	2220	1957	1836	2017	2352	2006	7.48521	-0.471372	0.0405576	ATP binding microtubule motor family protein
AT2G32560.1	AT2G32560	272	311	229	537	607	542	5.09168	0.504079	0.0405632	F-box family protein
AT1G24530.1	AT1G24530	191	173	147	130	179	166	3.85336	-0.651582	0.0405989	Transducin/WD40 repeat-like superfamily protein
AT1G74210.1	AT1G74210	315	300	261	657	577	567	5.19236	0.485869	0.0406772	PLC-like phosphodiesterases superfamily protein
AT5G57655.1	AT5G57655	2862	2460	1881	2215	2655	2692	7.72877	-0.465339	0.0406772	xylose isomerase family protein
AT1G05960.2	AT1G05960	660	806	550	645	747	706	5.89433	-0.490135	0.0407455	ARM repeat superfamily protein
AT3G07720.1	AT3G07720	352	276	239	622	656	515	5.17779	0.505971	0.0407455	Galactose oxidase/kelch repeat superfamily protein
AT2G46270.1	AT2G46270	443	490	470	893	1028	1084	5.9116	0.529348	0.0407976	G-box binding factor 3
AT5G15840.1	AT5G15840	52	71	54	47	49	42	2.24768	-0.916399	0.0408634	B-box type zinc finger protein with CCT domain
AT1G78660.3	AT1G78660	430	385	297	713	749	760	5.5058	0.458303	0.0409267	gamma-glutamyl hydrolase 1
AT1G77760.1	AT1G77760	115	114	60	135	424	279	3.9164	1.02069	0.0410577	nitrate reductase 1
AT5G38210.1	AT5G38210	111	107	85	76	68	108	3.04096	-0.810431	0.0410577	Protein kinase family protein
AT4G00335.1	AT4G00335	183	186	136	157	162	164	3.8499	-0.607323	0.0411706	RING-H2 finger B1A
AT2G18270.1	AT2G18270	79	77	98	44	82	64	2.75134	-0.999575	0.0412135	unknown protein
AT3G56220.1	AT3G56220	167	135	148	354	320	325	4.30968	0.589658	0.0412627	transcription regulators
AT3G13227.1	AT3G13227	38	106	18	10	16	39	1.8092	-1.80621	0.0413484	serine-rich protein-related
AT2G46360.1	AT2G46360	30	156	27	9	19	46	2.15518	-2.02726	0.0413487	unknown protein
AT1G14170.1	AT1G14170	179	154	132	353	332	308	4.31668	0.547742	0.0414765	RNA-binding KH domain-containing protein
AT2G05260.1	AT2G05260	114	109	86	251	231	214	3.78213	0.624575	0.041544	alpha/beta-Hydrolases superfamily protein
AT3G14810.2	AT3G14810	97	77	92	214	200	229	3.64076	0.708512	0.0415497	mechanosensitive channel of small conductance-like 5
AT5G65020.1	AT5G65020	548	456	397	1278	905	802	5.89193	0.54237	0.0415497	annexin 2
AT4G24170.1	AT4G24170	19	42	5	0	9	10	0.482642	-2.25038	0.0415507	ATP binding microtubule motor family protein
AT1G21680.1	AT1G21680	595	478	446	551	528	529	5.49688	-0.466931	0.0419082	DPP6 N-terminal domain-like protein
AT4G00335.2	AT4G00335	172	177	130	148	148	158	3.76932	-0.621273	0.041909	RING-H2 finger B1A
AT4G32630.1	AT4G32630	15	56	7	3	8	14	0.735168	-2.11788	0.041909	ArfGap/RecO-like zinc finger domain-containing protein
AT4G23430.3	AT4G23430	203	197	188	443	423	395	4.66143	0.539803	0.0419396	NAD(P)-binding Rossmann-fold superfamily protein
AT5G53830.1	AT5G53830	191	156	135	358	357	313	4.36598	0.548124	0.0419396	VQ motif-containing protein
AT4G33985.1	AT4G33985	34	54	21	74	118	136	2.58771	1.06316	0.0419414	Protein of unknown function (DUF1685)
AT2G21300.1	AT2G21300	2253	1960	1865	2061	2378	2013	7.50166	-0.470068	0.0419751	ATP binding microtubule motor family protein
AT1G11770.1	AT1G11770	127	500	56	35	57	169	3.84579	-1.87065	0.042067	FAD-binding Berberine family protein
AT1G58110.1	AT1G58110	630	433	410	530	509	477	5.43012	-0.49911	0.042067	Basic-leucine zipper (bZIP) transcription factor family protein
AT2G07749.1	AT2G07749	18	16	8	2	1	12	-0.0214747	-1.96788	0.042067	Mitovirus RNA-dependent RNA polymerase
AT2G40330.1	AT2G40330	76	36	31	117	190	107	2.92234	1.01953	0.042067	PYR1-like 6
AT5G05730.2	AT5G05730	250	212	161	419	381	528	4.72956	0.555701	0.042067	anthranilate synthase alpha subunit 1
AT5G43440.2	AT5G43440	21	29	19	51	66	105	2.03023	1.13633	0.042067	2-oxoglutarate (2OG) and Fe(II)-dependent oxygenase superfamily protein
AT1G03050.1	AT1G03050	269	1175	144	60	142	394	5.06102	-1.90091	0.0422149	ENTH/ANTH/VHS superfamily protein
AT5G66400.2	AT5G66400	11	15	19	84	25	86	1.75745	1.51621	0.0423618	Dehydrin family protein
AT1G05870.1	AT1G05870	259	253	220	565	498	466	4.94904	0.5074	0.0425376	Protein of unknown function (DUF1685)
AT1G14170.2	AT1G14170	174	153	130	344	326	306	4.29231	0.547448	0.0426205	RNA-binding KH domain-containing protein
AT5G22320.1	AT5G22320	431	635	301	401	399	485	5.26451	-0.619596	0.0426249	Leucine-rich repeat (LRR) family protein
AT5G36260.1	AT5G36260	20	51	10	11	10	16	0.904824	-1.62859	0.0426249	Eukaryotic aspartyl protease family protein
AT5G13990.1	AT5G13990	33	180	23	14	26	46	2.31132	-1.95004	0.0426505	exocyst subunit exo70 family protein C2
AT5G04370.1	AT5G04370	6	1	4	19	12	24	0.0928159	1.74796	0.0426582	S-adenosyl-L-methionine-dependent methyltransferases superfamily protein
AT2G45950.2	AT2G45950	262	422	218	220	272	319	4.64721	-0.692635	0.042662	SKP1-like 20
AT2G47340.1	AT2G47340	34	98	18	10	16	36	1.71341	-1.76798	0.042812	Plant invertase/pectin methylesterase inhibitor superfamily protein
AT5G50570.2	AT5G50570	210	262	129	416	386	541	4.71586	0.633265	0.0430118	Squamosa promoter-binding protein-like (SBP domain) transcription factor family protein
AT2G17930.1	AT2G17930	1754	1426	1402	1281	1925	1420	7.06376	-0.539494	0.0432561	Phosphatidylinositol 3- and 4-kinase family protein with FAT domain
AT1G05960.1	AT1G05960	667	818	555	656	754	718	5.91268	-0.486532	0.0432903	ARM repeat superfamily protein
AT5G24490.1	AT5G24490	1965	1317	1272	1250	1608	1717	7.04329	-0.531238	0.0434446	30S ribosomal protein, putative
AT3G10460.1	AT3G10460	7	24	0	1	0	3	-0.58024	-3.28774	0.0434863	Plant self-incompatibility protein S1 family
AT5G35405.1	AT5G35405	23	5	8	30	56	55	1.34681	1.45092	0.0435295	Protein of unknown function (DUF784)
AT4G29950.1	AT4G29950	218	245	203	476	471	456	4.82325	0.51703	0.0435948	Ypt/Rab-GAP domain of gyp1p superfamily protein
AT3G10410.1	AT3G10410	3311	3257	2857	3658	3340	3169	8.14403	-0.449003	0.0437118	SERINE CARBOXYPEPTIDASE-LIKE 49
AT1G69780.1	AT1G69780	915	646	667	808	833	658	6.03307	-0.504695	0.0437714	Homeobox-leucine zipper protein family
AT3G09760.1	AT3G09760	378	445	315	402	396	386	5.07074	-0.49199	0.0438212	RING/U-box superfamily protein
AT3G16840.1	AT3G16840	1115	1667	778	1023	1020	1310	6.64448	-0.615434	0.0439507	P-loop containing nucleoside triphosphate hydrolases superfamily protein
AT3G23240.1	AT3G23240	10	6	4	13	37	36	0.680603	1.56913	0.0439582	ethylene response factor 1
AT4G23710.1	AT4G23710	355	341	249	772	679	526	5.3098	0.522247	0.0440614	vacuolar ATP synthase subunit G2
AT3G25020.1	AT3G25020	312	238	164	257	209	219	4.33653	-0.584645	0.044094	receptor like protein 42
AT2G22360.1	AT2G22360	401	350	271	382	345	334	4.90872	-0.486148	0.044177	DNAJ heat shock family protein
AT3G23090.1	AT3G23090	3	4	7	16	26	24	0.332185	1.64599	0.044177	TPX2 (targeting protein for Xklp2) protein family
AT2G24600.1	AT2G24600	10	10	2	22	21	59	0.8766	1.69947	0.0442663	Ankyrin repeat family protein
AT5G22320.2	AT5G22320	412	627	285	372	375	473	5.20639	-0.646707	0.0443389	Leucine-rich repeat (LRR) family protein
AT5G41780.1	AT5G41780	28	98	14	5	11	30	1.54046	-2.08877	0.0444022	myosin heavy chain-related
AT1G63840.1	AT1G63840	520	502	499	941	1157	1092	6.00769	0.503962	0.0444338	RING/U-box superfamily protein
AT1G06160.1	AT1G06160	1	1	1	10	17	3	-0.69321	2.65545	0.0444538	octadecanoid-responsive Arabidopsis AP2/ERF 59
AT5G52310.1	AT5G52310	147	62	167	358	239	685	4.46964	1.17049	0.0445275	low-temperature-responsive protein 78 (LTI78) / desiccation-responsive protein 29A (RD29A)
AT3G52800.1	AT3G52800	568	958	436	968	1862	2231	6.54714	0.837866	0.0445361	A20/AN1-like zinc finger family protein
AT3G22750.1	AT3G22750	310	650	200	190	325	344	4.89336	-0.947577	0.0446083	Protein kinase superfamily protein
AT2G11910.1	AT2G11910	2036	2611	1218	1993	1850	1901	7.38162	-0.552763	0.0446917	unknown protein
AT2G18730.1	AT2G18730	593	609	468	1077	1118	1123	6.08836	0.442583	0.0446917	diacylglycerol kinase 3
AT4G09464.1	AT4G09464	51	15	23	54	123	144	2.48838	1.33152	0.0446917	Carbohydrate-binding X8 domain superfamily protein
AT1G28100.2	AT1G28100	388	293	210	262	291	318	4.66786	-0.557107	0.0447173	unknown protein
AT2G28640.1	AT2G28640	11	40	6	4	6	10	0.35441	-1.99447	0.0447284	exocyst subunit exo70 family protein H5
AT3G44750.2	AT3G44750	1385	1507	660	1254	911	1152	6.62303	-0.609631	0.0447701	histone deacetylase 3
AT4G34290.1	AT4G34290	931	768	511	802	659	803	6.00219	-0.489767	0.0447925	SWIB/MDM2 domain superfamily protein
AT1G14455.1	AT1G14455	32	13	20	41	90	98	2.03828	1.2747	0.0450113	unknown protein
AT1G64370.1	AT1G64370	707	769	649	1117	1902	1689	6.53394	0.590979	0.0450113	unknown protein
AT2G43780.2	AT2G43780	345	360	222	301	327	308	4.74828	-0.518806	0.0450113	unknown protein
AT4G24380.1	AT4G24380	164	481	112	397	877	1372	5.47253	1.29735	0.045239	unknown protein
AT3G53140.1	AT3G53140	1956	1654	1471	2039	1825	1491	7.23344	-0.474599	0.0452749	O-methyltransferase family protein
AT3G50810.1	AT3G50810	125	168	120	119	127	127	3.53512	-0.701665	0.0452983	Uncharacterised protein family (UPF0497)
AT1G72645.1	AT1G72645	254	248	204	233	197	268	4.35424	-0.566099	0.0455478	unknown protein
AT4G24805.1	AT4G24805	130	146	98	239	311	286	4.04659	0.618455	0.045551	S-adenosyl-L-methionine-dependent methyltransferases superfamily protein
AT4G09467.1	AT4G09467	51	15	23	54	123	143	2.48519	1.32699	0.0455745	Carbohydrate-binding X8 domain superfamily protein
AT1G69840.3	AT1G69840	420	820	290	872	1254	2075	6.24451	0.938175	0.0457657	SPFH/Band 7/PHB domain-containing membrane-associated protein family
AT3G25890.2	AT3G25890	413	295	244	318	329	314	4.78594	-0.518795	0.0457826	Integrase-type DNA-binding superfamily protein
ATCG01040.1	ATCG01040	41	80	26	12	26	40	1.78769	-1.42585	0.0457852	Cytochrome C assembly protein
AT1G28060.1	AT1G28060	912	839	580	827	807	849	6.10857	-0.442377	0.0458009	Pre-mRNA-splicing factor 3
AT4G27250.1	AT4G27250	18	22	11	48	48	55	1.53628	1.02652	0.0458181	NAD(P)-binding Rossmann-fold superfamily protein
AT5G50570.1	AT5G50570	218	267	131	427	390	552	4.74577	0.626445	0.0458181	Squamosa promoter-binding protein-like (SBP domain) transcription factor family protein
AT5G58170.1	AT5G58170	187	726	95	51	115	258	4.44195	-1.73704	0.0458184	SHV3-like 5
AT5G57655.2	AT5G57655	2962	2547	1945	2322	2764	2793	7.78224	-0.45549	0.0459607	xylose isomerase family protein
AT1G18210.2	AT1G18210	1218	1502	862	1170	1323	1185	6.70691	-0.497019	0.0460289	Calcium-binding EF-hand family protein
AT5G20950.1	AT5G20950	3309	3269	2093	3261	3045	2887	7.99803	-0.447598	0.0461506	Glycosyl hydrolase family protein
AT3G18530.1	AT3G18530	149	111	157	90	104	150	3.5111	-0.853651	0.0462209	ARM repeat superfamily protein
AT5G03190.1	AT5G03190	494	615	469	1171	915	1267	6.06754	0.528588	0.0463563	conserved peptide upstream open reading frame 47
AT5G03190.3	AT5G03190	494	615	469	1171	915	1267	6.06754	0.528588	0.0463563	conserved peptide upstream open reading frame 47
AT5G20950.2	AT5G20950	3271	3247	2060	3212	3006	2859	7.98107	-0.4499	0.0464376	Glycosyl hydrolase family protein
AT1G57990.1	AT1G57990	44	45	24	47	144	227	2.84593	1.36898	0.0465636	purine permease 18
AT2G30020.1	AT2G30020	222	240	118	288	556	558	4.73471	0.757857	0.0465636	Protein phosphatase 2C family protein
AT4G33770.1	AT4G33770	146	130	171	115	130	148	3.64832	-0.767085	0.0465636	Inositol 1,3,4-trisphosphate 5/6-kinase family protein
AT1G58110.2	AT1G58110	652	445	426	557	530	489	5.48167	-0.491824	0.0466686	Basic-leucine zipper (bZIP) transcription factor family protein
AT1G55570.1	AT1G55570	197	769	91	55	88	278	4.48991	-1.81246	0.0469106	SKU5 similar 12
AT1G28270.1	AT1G28270	142	618	82	39	83	215	4.16778	-1.81141	0.0470155	ralf-like 4
AT1G51660.1	AT1G51660	188	201	146	312	404	460	4.54342	0.592379	0.0470155	mitogen-activated protein kinase kinase 4
AT3G09560.2	AT3G09560	445	439	375	886	781	869	5.69614	0.455907	0.0471137	Lipin family protein
AT5G50130.2	AT5G50130	104	99	93	236	210	232	3.74082	0.638226	0.0471232	NAD(P)-binding Rossmann-fold superfamily protein
AT5G64330.1	AT5G64330	438	477	384	396	527	407	5.25546	-0.519992	0.0471232	Phototropic-responsive NPH3 family protein
AT2G32160.1	AT2G32160	137	108	58	58	71	100	2.9714	-0.910294	0.0473013	S-adenosyl-L-methionine-dependent methyltransferases superfamily protein
AT5G10660.2	AT5G10660	11	68	13	5	11	16	0.987888	-2.02903	0.047321	calmodulin-binding protein-related
AT1G60240.1	AT1G60240	12	42	6	2	3	12	0.359301	-2.28969	0.0474207	NAC (No Apical Meristem) domain transcriptional regulator superfamily protein
AT2G13620.1	AT2G13620	10	15	5	1	4	7	-0.383691	-1.80724	0.0474207	cation/hydrogen exchanger 15
AT2G16895.1	AT2G16895	53	34	27	80	133	100	2.56082	0.929851	0.0474207	pseudogene
AT1G14440.1	AT1G14440	177	377	167	216	191	201	4.28917	-0.788797	0.0475645	homeobox protein 31
AT5G58320.3	AT5G58320	98	94	71	198	191	210	3.56343	0.643957	0.0475699	Kinase interacting (KIP1-like) family protein
AT5G43030.1	AT5G43030	4	3	2	0	0	0	-1.75871	-4.92411	0.0475767	Cysteine/Histidine-rich C1 domain family protein
AT4G24380.2	AT4G24380	154	445	107	363	819	1255	5.36034	1.27797	0.0475884	unknown protein
AT5G26730.1	AT5G26730	2	1	0	13	7	6	-0.826573	2.46647	0.047773	Fasciclin-like arabinogalactan family protein
AT2G22680.1	AT2G22680	1440	1272	1256	1467	1554	1088	6.87373	-0.511425	0.0477887	Zinc finger (C3HC4-type RING finger) family protein
AT2G43970.2	AT2G43970	3263	3303	2650	2724	3625	3356	8.09464	-0.475051	0.0480861	RNA-binding protein
AT3G63400.2	AT3G63400	583	661	394	502	524	638	5.57248	-0.510465	0.0482287	Cyclophilin-like peptidyl-prolyl cis-trans isomerase family protein
AT5G27780.1	AT5G27780	32	41	41	27	24	31	1.59464	-1.04419	0.0482346	SAUR-like auxin-responsive protein family
AT3G45640.1	AT3G45640	321	436	183	485	713	1296	5.51197	0.893846	0.0483391	mitogen-activated protein kinase 3
AT2G21940.3	AT2G21940	278	236	218	218	217	286	4.40492	-0.571577	0.048378	shikimate kinase 1
AT2G31010.2	AT2G31010	131	95	70	260	251	180	3.74575	0.693697	0.048378	Protein kinase superfamily protein
AT2G03972.2	AT2G03972	0	0	0	4	5	3	-1.58935	4.80613	0.048401	pseudogene
AT4G12560.1	AT4G12560	737	736	617	747	774	736	5.97163	-0.442572	0.0484173	F-box and associated interaction domains-containing protein
AT1G02810.1	AT1G02810	107	63	73	188	223	179	3.51015	0.733766	0.0485268	Plant invertase/pectin methylesterase inhibitor superfamily
AT2G21940.5	AT2G21940	278	238	220	217	226	285	4.41563	-0.565929	0.0485268	shikimate kinase 1
AT1G14440.2	AT1G14440	166	367	159	209	179	186	4.22107	-0.812762	0.0485329	homeobox protein 31
AT2G27470.1	AT2G27470	440	549	307	450	442	419	5.23243	-0.518667	0.0485751	nuclear factor Y, subunit B11
AT3G09560.3	AT3G09560	446	439	376	887	781	869	5.69746	0.454093	0.0486467	Lipin family protein
AT1G18460.1	AT1G18460	493	352	378	378	415	456	5.16593	-0.521446	0.0487257	alpha/beta-Hydrolases superfamily protein
AT3G20865.1	AT3G20865	199	871	101	64	140	288	4.6568	-1.73772	0.0487257	arabinogalactan protein 40
AT4G13210.1	AT4G13210	6	2	6	29	20	15	0.297724	1.61109	0.0488147	Pectin lyase-like superfamily protein
AT2G15042.1	AT2G15042	1	0	0	2	8	7	-1.27041	3.20796	0.0489005	Leucine-rich repeat (LRR) family protein
AT4G21830.1	AT4G21830	1	0	0	2	7	8	-1.27039	3.20808	0.0489068	methionine sulfoxide reductase B7
AT3G61590.2	AT3G61590	211	217	159	192	207	180	4.08438	-0.563958	0.0489937	Galactose oxidase/kelch repeat superfamily protein
AT4G19520.1	AT4G19520	1	1	0	4	5	20	-0.759233	3.15225	0.0490148	disease resistance protein (TIR-NBS-LRR class) family
AT4G28085.1	AT4G28085	1	1	0	2	8	21	-0.694808	3.25176	0.0491687	unknown protein
AT4G28085.2	AT4G28085	1	1	0	2	8	21	-0.694808	3.25175	0.0491687	unknown protein
AT5G01840.1	AT5G01840	91	119	58	162	231	281	3.67691	0.80291	0.049292	ovate family protein 1
AT3G05910.2	AT3G05910	393	266	259	871	625	523	5.31105	0.592166	0.049492	Pectinacetylesterase family protein
AT2G31010.1	AT2G31010	131	95	70	259	251	180	3.74447	0.691634	0.0495717	Protein kinase superfamily protein
AT3G52740.1	AT3G52740	38	59	37	35	29	36	1.83017	-0.971396	0.0496963	unknown protein
AT5G23170.1	AT5G23170	45	42	28	23	32	30	1.60599	-0.966695	0.0496963	Protein kinase superfamily protein
AT1G80160.1	AT1G80160	17	10	5	25	32	74	1.23647	1.52161	0.0497897	Lactoylglutathione lyase / glyoxalase I family protein
AT5G56360.1	AT5G56360	1982	2181	1447	2323	1855	1646	7.36209	-0.488707	0.0497897	calmodulin-binding protein
AT3G09560.1	AT3G09560	449	445	378	894	785	876	5.70846	0.452002	0.050026	Lipin family protein
AT3G21570.1	AT3G21570	56	214	35	7	25	71	2.65513	-2.05787	0.050026	unknown protein
AT4G26590.1	AT4G26590	432	290	300	592	754	840	5.44582	0.553086	0.050026	oligopeptide transporter 5
AT1G78660.2	AT1G78660	415	369	281	676	708	733	5.43891	0.452127	0.0500937	gamma-glutamyl hydrolase 1
AT2G31980.1	AT2G31980	64	106	76	58	25	79	2.63211	-1.16757	0.0500937	PHYTOCYSTATIN 2
AT4G22240.1	AT4G22240	5989	4531	5434	6543	5089	4642	8.87576	-0.542694	0.0503245	Plastid-lipid associated protein PAP / fibrillin family protein
AT3G48690.1	AT3G48690	324	261	229	537	505	624	5.08037	0.489533	0.0503936	alpha/beta-Hydrolases superfamily protein
AT5G60270.1	AT5G60270	0	0	0	6	3	3	-1.58969	4.80438	0.0503936	Concanavalin A-like lectin protein kinase family protein
AT4G09465.1	AT4G09465	46	12	19	49	109	121	2.29318	1.34239	0.0503985	Carbohydrate-binding X8 domain superfamily protein
AT3G62420.1	AT3G62420	582	680	481	932	1361	1426	6.21196	0.547054	0.0504229	basic region/leucine zipper motif 53
AT3G62422.1	AT3G62422	582	680	481	932	1361	1426	6.21196	0.547054	0.0504229	conserved peptide upstream open reading frame 3
AT2G43590.1	AT2G43590	21	12	18	15	7	3	0.336707	-1.57653	0.0504312	Chitinase family protein
AT1G03610.1	AT1G03610	607	557	458	459	592	631	5.57856	-0.492525	0.0504342	Protein of unknown function (DUF789)
AT3G01230.1	AT3G01230	235	940	106	54	147	314	4.76971	-1.79746	0.0504342	unknown protein
AT3G07310.1	AT3G07310	575	413	415	422	508	512	5.36457	-0.506949	0.0505489	Protein of unknown function (DUF760)
AT5G02110.1	AT5G02110	92	377	35	19	41	116	3.3774	-1.9947	0.0505489	CYCLIN D7;1
AT1G02400.1	AT1G02400	30	44	38	15	34	25	1.52664	-1.16145	0.050657	gibberellin 2-oxidase 6
AT4G30810.1	AT4G30810	605	462	472	1298	1095	860	6.02388	0.523906	0.050657	serine carboxypeptidase-like 29
AT4G36700.1	AT4G36700	0	0	0	3	3	6	-1.58912	4.80735	0.0506926	RmlC-like cupins superfamily protein
AT4G20830.2	AT4G20830	304	421	139	501	702	958	5.3309	0.820127	0.050731	FAD-binding Berberine family protein
AT5G20110.1	AT5G20110	47	60	34	25	30	45	1.86994	-1.02883	0.0507462	Dynein light chain type 1 family protein
AT2G22900.1	AT2G22900	372	313	310	749	643	652	5.37562	0.481419	0.0508912	Galactosyl transferase GMA12/MNN10 family protein
AT1G69840.2	AT1G69840	410	804	290	858	1208	1994	6.20422	0.912055	0.0509459	SPFH/Band 7/PHB domain-containing membrane-associated protein family
AT2G19970.1	AT2G19970	52	51	39	78	168	156	2.90123	0.959164	0.0510142	CAP (Cysteine-rich secretory proteins, Antigen 5, and Pathogenesis-related 1 protein) superfamily protein
AT1G66760.1	AT1G66760	44	39	43	108	79	212	2.84742	1.09808	0.0510558	MATE efflux family protein
AT3G03430.1	AT3G03430	17	63	11	5	5	21	0.962622	-2.04421	0.0510558	Calcium-binding EF-hand family protein
AT4G22470.1	AT4G22470	0	0	0	1	1	21	-1.05314	5.7299	0.0513199	protease inhibitor/seed storage/lipid transfer protein (LTP) family protein
AT4G25590.1	AT4G25590	40	137	11	9	18	37	1.95799	-2.02366	0.0513874	actin depolymerizing factor 7
AT4G27435.1	AT4G27435	87	73	84	198	166	238	3.53741	0.737554	0.0514657	Protein of unknown function (DUF1218)
AT2G27710.3	AT2G27710	4029	4305	2064	3834	3170	3241	8.2058	-0.536836	0.0516085	60S acidic ribosomal protein family
AT5G48430.1	AT5G48430	5	3	1	0	0	0	-1.76049	-4.90917	0.0516916	Eukaryotic aspartyl protease family protein
AT1G16610.2	AT1G16610	891	1139	651	953	885	938	6.29503	-0.487375	0.0516953	arginine/serine-rich 45
AT3G47295.1	AT3G47295	80	56	82	161	175	241	3.44649	0.831279	0.0517232	unknown protein
AT5G57800.1	AT5G57800	2466	1362	2136	5090	4369	4188	8.04984	0.621697	0.0517232	Fatty acid hydroxylase superfamily
AT3G62230.1	AT3G62230	598	2311	257	131	269	834	6.06439	-1.84068	0.0517528	F-box family protein
AT2G46100.2	AT2G46100	117	126	100	223	239	337	3.96409	0.669329	0.0518006	Nuclear transport factor 2 (NTF2) family protein
AT5G16780.1	AT5G16780	1339	1639	1008	1278	1363	1509	6.87242	-0.481405	0.0518006	SART-1 family
AT2G07680.1	AT2G07680	91	99	75	66	95	58	2.84756	-0.822767	0.0518024	multidrug resistance-associated protein 11
AT5G13840.2	AT5G13840	706	1116	507	725	787	713	6.04121	-0.596859	0.0518515	FIZZY-related 3
AT5G22630.1	AT5G22630	232	198	245	479	524	492	4.89287	0.572453	0.0518515	arogenate dehydratase 5
AT3G54820.1	AT3G54820	3345	3389	3104	3534	3752	3328	8.20969	-0.453749	0.0518824	plasma membrane intrinsic protein 2;5
AT1G67590.1	AT1G67590	459	558	348	406	487	498	5.31606	-0.512821	0.0519404	Remorin family protein
AT1G68750.1	AT1G68750	8	18	2	1	2	5	-0.554671	-2.24466	0.0520823	phosphoenolpyruvate carboxylase 4
AT1G12180.1	AT1G12180	63	51	38	98	126	181	2.93505	0.881369	0.0521392	unknown protein
AT1G68320.1	AT1G68320	454	562	401	293	462	565	5.32499	-0.651316	0.0521392	myb domain protein 62
AT4G14365.1	AT4G14365	20	11	1	35	30	80	1.33649	1.70966	0.0521392	XB3 ortholog 4 in Arabidopsis thaliana
AT2G36380.1	AT2G36380	129	90	108	263	224	272	3.89422	0.655933	0.0523751	pleiotropic drug resistance 6
AT1G29280.1	AT1G29280	2	8	7	1	2	1	-1.09413	-2.54002	0.0524642	WRKY DNA-binding protein 65
AT5G38640.1	AT5G38640	404	336	314	402	379	310	4.95798	-0.502205	0.0524642	NagB/RpiA/CoA transferase-like superfamily protein
AT5G08640.2	AT5G08640	692	295	539	1947	1223	905	6.22229	0.847234	0.0525277	flavonol synthase 1
ATCG00220.1	ATCG00220	477	592	371	332	414	603	5.34519	-0.633744	0.0525277	photosystem II reaction center protein M
AT4G31610.1	AT4G31610	156	141	116	295	326	267	4.15397	0.558392	0.0526471	Transcriptional factor B3 family protein
AT5G07260.2	AT5G07260	0	0	1	12	2	7	-1.09294	3.4738	0.0527459	START (StAR-related lipid-transfer) lipid-binding domain
AT5G07260.1	AT5G07260	0	0	1	12	2	7	-1.09294	3.4738	0.0527488	START (StAR-related lipid-transfer) lipid-binding domain
AT1G01780.1	AT1G01780	254	473	157	178	238	285	4.53707	-0.85022	0.0528721	GATA type zinc finger transcription factor family protein
AT1G31850.1	AT1G31850	1474	1417	1152	2631	2662	2632	7.34987	0.421903	0.0528721	S-adenosyl-L-methionine-dependent methyltransferases superfamily protein
AT4G24350.1	AT4G24350	115	84	58	168	205	233	3.55588	0.714529	0.0528721	Phosphorylase superfamily protein
AT1G56220.2	AT1G56220	2427	2077	1906	1781	2313	2548	7.56206	-0.49874	0.0529493	Dormancy/auxin associated family protein
AT4G15260.1	AT4G15260	60	45	40	100	132	137	2.82802	0.806778	0.0529524	UDP-Glycosyltransferase superfamily protein
AT4G05020.2	AT4G05020	246	240	179	509	415	440	4.79134	0.492029	0.0529987	NAD(P)H dehydrogenase B2
AT1G13450.2	AT1G13450	287	281	276	264	268	321	4.63271	-0.548079	0.0531712	Homeodomain-like superfamily protein
AT4G16740.1	AT4G16740	0	0	2	3	7	18	-0.789458	3.04437	0.0531712	terpene synthase 03
AT1G63100.1	AT1G63100	447	480	282	447	441	294	5.10902	-0.564647	0.0532876	GRAS family transcription factor
AT5G24655.1	AT5G24655	91	135	58	57	72	88	2.89354	-0.911826	0.0533144	response to low sulfur 4
AT3G61590.1	AT3G61590	220	220	164	203	211	191	4.1344	-0.54164	0.0533233	Galactose oxidase/kelch repeat superfamily protein
AT1G56220.1	AT1G56220	2536	2163	1987	1861	2420	2661	7.62399	-0.4957	0.053401	Dormancy/auxin associated family protein
AT4G17230.1	AT4G17230	325	383	241	504	692	941	5.38298	0.63392	0.0534418	SCARECROW-like 13
AT5G52780.1	AT5G52780	258	143	160	175	165	176	3.9753	-0.659698	0.0534418	Protein of unknown function (DUF3464)
AT1G16700.1	AT1G16700	759	738	555	1613	1423	1123	6.39782	0.473848	0.053465	Alpha-helical ferredoxin
AT5G63790.1	AT5G63790	129	101	81	187	238	301	3.82158	0.688537	0.0535031	NAC domain containing protein 102
AT4G00300.2	AT4G00300	372	340	239	662	627	600	5.27346	0.453992	0.0535048	fringe-related protein
AT4G09770.2	AT4G09770	10	24	3	4	6	3	-0.181391	-1.97613	0.0535757	TRAF-like family protein
AT4G09770.1	AT4G09770	10	24	3	4	6	3	-0.181391	-1.97613	0.0535776	TRAF-like family protein
AT4G19710.1	AT4G19710	548	422	375	886	952	835	5.7749	0.448339	0.0536487	aspartate kinase-homoserine dehydrogenase ii
AT5G61720.1	AT5G61720	362	1504	154	101	195	519	5.42642	-1.79075	0.0536487	Protein of unknown function (DUF1216)
AT1G31850.3	AT1G31850	1466	1412	1146	2612	2649	2620	7.34238	0.420711	0.0536766	S-adenosyl-L-methionine-dependent methyltransferases superfamily protein
AT2G43970.1	AT2G43970	3503	3503	2814	2940	3898	3575	8.19	-0.464465	0.0536766	RNA-binding protein
AT4G27460.1	AT4G27460	10	7	5	16	28	46	0.752776	1.49192	0.0536766	Cystathionine beta-synthase (CBS) family protein
AT5G07280.1	AT5G07280	427	387	319	654	746	948	5.56682	0.506777	0.0536766	Leucine-rich repeat transmembrane protein kinase
AT1G76040.1	AT1G76040	124	142	96	250	245	312	3.99812	0.612707	0.0536976	calcium-dependent protein kinase 29
AT1G56220.4	AT1G56220	2394	2060	1883	1755	2294	2519	7.54571	-0.498364	0.0537006	Dormancy/auxin associated family protein
AT1G28420.1	AT1G28420	816	1133	698	865	976	889	6.28046	-0.502294	0.0537836	homeobox-1
AT3G01540.4	AT3G01540	2492	2404	1991	2362	2506	2628	7.69407	-0.428126	0.0537836	DEAD box RNA helicase 1
AT3G49010.5	AT3G49010	4634	4598	2756	4256	4246	4147	8.45971	-0.448899	0.0537836	breast basic conserved 1
AT1G74450.1	AT1G74450	88	174	75	186	365	366	4.07826	0.909523	0.0539328	Protein of unknown function (DUF793)
AT2G23290.1	AT2G23290	137	190	68	235	462	315	4.23837	0.846888	0.0539328	myb domain protein 70
AT5G38720.1	AT5G38720	521	742	316	464	438	566	5.46054	-0.626577	0.0540139	unknown protein
AT3G56260.2	AT3G56260	15	18	10	38	47	46	1.3371	1.06393	0.0541013	unknown protein
AT1G01800.2	AT1G01800	575	467	440	1081	1018	882	5.92726	0.45675	0.0541295	NAD(P)-binding Rossmann-fold superfamily protein
AT1G13450.3	AT1G13450	324	301	298	289	304	352	4.76791	-0.526994	0.0541295	Homeodomain-like superfamily protein
AT5G13840.1	AT5G13840	711	1120	507	727	793	719	6.04794	-0.592924	0.0541295	FIZZY-related 3
AT5G39220.1	AT5G39220	240	345	135	506	505	613	4.97919	0.655017	0.0541295	alpha/beta-Hydrolases superfamily protein
AT3G63210.1	AT3G63210	678	571	505	408	686	636	5.6622	-0.564447	0.0541326	Protein of unknown function (DUF581)
AT5G62360.1	AT5G62360	594	605	311	462	521	515	5.43157	-0.529069	0.0543469	Plant invertase/pectin methylesterase inhibitor superfamily protein
AT4G32630.2	AT4G32630	15	56	7	3	8	15	0.746835	-2.06185	0.0544636	ArfGap/RecO-like zinc finger domain-containing protein
AT1G52618.1	AT1G52618	47	53	39	28	45	33	1.89188	-0.935402	0.054516	unknown protein
AT1G56220.3	AT1G56220	2469	2115	1945	1820	2356	2606	7.59021	-0.495447	0.0547893	Dormancy/auxin associated family protein
AT2G24693.1	AT2G24693	58	22	24	55	152	143	2.63174	1.23953	0.0548586	Protein of unknown function (PD694200)
AT5G04290.1	AT5G04290	799	679	565	763	693	754	5.93366	-0.430175	0.0548586	kow domain-containing transcription factor 1
AT1G69818.1	AT1G69818	3	1	0	3	11	25	-0.40961	2.69854	0.054952	Defensin-like (DEFL) family protein
AT3G17980.1	AT3G17980	122	473	59	33	58	174	3.8046	-1.78901	0.054952	Calcium-dependent lipid-binding (CaLB domain) family protein
AT3G19830.1	AT3G19830	438	561	403	522	495	441	5.37382	-0.499091	0.0549711	Calcium-dependent lipid-binding (CaLB domain) family protein
AT5G11940.1	AT5G11940	13	5	4	22	34	24	0.633764	1.3299	0.0550327	Subtilase family protein
AT3G05910.1	AT3G05910	689	541	498	1370	1121	1013	6.15248	0.471374	0.055094	Pectinacetylesterase family protein
AT4G25000.1	AT4G25000	5	3	12	35	21	37	0.767633	1.59989	0.0550982	alpha-amylase-like
AT4G00335.3	AT4G00335	165	161	118	139	141	144	3.66339	-0.607698	0.0552328	RING-H2 finger B1A
AT2G16280.1	AT2G16280	618	441	419	1112	920	947	5.92165	0.466921	0.0554308	3-ketoacyl-CoA synthase 9
AT4G17420.2	AT4G17420	122	84	90	260	214	208	3.74229	0.653171	0.0554308	Tryptophan RNA-binding attenuator protein-like
AT4G07526.2	AT4G07526	3	5	3	0	1	0	-1.56288	-3.51489	0.0554333	unknown protein
AT4G07526.3	AT4G07526	3	5	3	0	1	0	-1.56288	-3.51489	0.0554333	unknown protein
AT5G05940.1	AT5G05940	187	220	153	211	181	122	3.9754	-0.67344	0.0554434	ROP guanine nucleotide exchange factor 5
AT5G08640.1	AT5G08640	817	355	630	2197	1421	1072	6.43726	0.811742	0.0554434	flavonol synthase 1
AT4G19710.2	AT4G19710	562	463	400	927	1003	883	5.85317	0.436794	0.0554701	aspartate kinase-homoserine dehydrogenase ii
AT5G17890.1	AT5G17890	510	611	374	453	509	570	5.44911	-0.502675	0.0556926	DA1-related protein 4
AT1G16610.1	AT1G16610	976	1238	710	1036	976	1032	6.42328	-0.479308	0.0557454	arginine/serine-rich 45
AT2G07040.1	AT2G07040	309	1402	168	89	199	488	5.33465	-1.76368	0.0558211	Leucine-rich repeat protein kinase family protein
AT5G07570.1	AT5G07570	9	3	1	1	1	0	-1.39724	-2.94387	0.0558347	glycine/proline-rich protein
AT3G52700.1	AT3G52700	145	337	108	85	125	195	3.88712	-1.06269	0.0558382	unknown protein
AT1G60730.3	AT1G60730	23	9	12	73	49	31	1.4932	1.25454	0.0558572	NAD(P)-linked oxidoreductase superfamily protein
AT2G21180.1	AT2G21180	92	114	76	50	64	104	2.89987	-0.914022	0.0558572	unknown protein
AT5G04047.1	AT5G04047	41	11	19	51	107	86	2.12964	1.25584	0.0558572	Plant self-incompatibility protein S1 family
AT5G52020.1	AT5G52020	0	0	0	2	7	3	-1.58902	4.80812	0.0559596	Integrase-type DNA-binding superfamily protein
AT4G20170.1	AT4G20170	312	377	319	609	782	758	5.4307	0.529193	0.0560187	Domain of unknown function (DUF23)
AT3G44750.1	AT3G44750	1466	1581	690	1337	976	1221	6.70303	-0.59072	0.0560373	histone deacetylase 3
AT2G34080.1	AT2G34080	1	2	3	15	13	8	-0.429276	1.97025	0.056049	Cysteine proteinases superfamily protein
AT1G61720.1	AT1G61720	33	6	17	43	57	147	2.06678	1.60827	0.0561467	NAD(P)-binding Rossmann-fold superfamily protein
AT2G01280.1	AT2G01280	344	393	199	233	262	368	4.70436	-0.638365	0.0563385	Cyclin/Brf1-like TBP-binding protein
AT4G35165.1	AT4G35165	61	22	38	74	166	147	2.79664	1.13576	0.0564038	Protein of unknown function (DUF1278)
AT5G28910.1	AT5G28910	22	14	10	50	50	37	1.40176	1.03992	0.0565144	unknown protein
AT1G18265.1	AT1G18265	8	6	3	20	20	25	0.360161	1.38805	0.0565673	Protein of unknown function, DUF593
AT5G14380.1	AT5G14380	389	1488	220	106	215	600	5.51661	-1.67857	0.0565741	arabinogalactan protein 6
AT3G25890.1	AT3G25890	420	294	247	328	332	320	4.80553	-0.504132	0.0566285	Integrase-type DNA-binding superfamily protein
AT1G01060.5	AT1G01060	818	559	1602	960	787	548	6.35428	-1.02946	0.0566871	Homeodomain-like superfamily protein
AT2G31820.1	AT2G31820	461	385	363	835	837	749	5.63218	0.449374	0.0567688	Ankyrin repeat family protein
AT2G38120.1	AT2G38120	3206	2974	2544	2963	3470	3048	8.03431	-0.430736	0.056914	Transmembrane amino acid transporter family protein
AT2G21940.4	AT2G21940	267	232	211	213	215	279	4.36766	-0.555928	0.0572425	shikimate kinase 1
AT1G60610.1	AT1G60610	282	316	254	306	301	275	4.65527	-0.506115	0.0573463	SBP (S-ribonuclease binding protein) family protein
AT1G12672.2	AT1G12672	6	1	0	9	12	18	-0.331802	1.92905	0.0574355	unknown protein
AT5G13340.1	AT5G13340	147	267	118	107	144	180	3.82825	-0.836567	0.0575324	unknown protein
AT3G02310.1	AT3G02310	1826	1568	1443	3325	3295	2946	7.61674	0.430579	0.057546	K-box region and MADS-box transcription factor family protein
AT4G01450.2	AT4G01450	203	173	142	409	375	308	4.45759	0.531828	0.0576174	nodulin MtN21 /EamA-like transporter family protein
AT5G52360.1	AT5G52360	26	106	17	7	11	35	1.65488	-1.98392	0.0576733	actin depolymerizing factor 10
AT2G28650.1	AT2G28650	34	26	30	80	90	74	2.22994	0.880829	0.0577041	exocyst subunit exo70 family protein H8
AT2G40400.2	AT2G40400	404	245	259	353	262	269	4.70041	-0.58122	0.0577375	Protein of unknown function (DUF399 and DUF3411)
AT3G27220.1	AT3G27220	231	154	127	196	144	113	3.81463	-0.707253	0.0578195	Galactose oxidase/kelch repeat superfamily protein
AT4G24010.1	AT4G24010	228	240	199	197	258	208	4.27884	-0.562215	0.0579221	cellulose synthase like G1
AT2G39855.2	AT2G39855	24	53	66	2	37	13	1.64832	-2.07199	0.058018	unknown protein
AT4G32920.2	AT4G32920	642	685	471	653	531	708	5.73178	-0.468311	0.0581495	glycine-rich protein
AT2G25200.1	AT2G25200	5	5	5	14	21	27	0.285156	1.48014	0.0581803	Plant protein of unknown function (DUF868)
AT2G27710.2	AT2G27710	4100	4353	2099	3914	3253	3322	8.23226	-0.524095	0.0582136	60S acidic ribosomal protein family
AT4G11485.1	AT4G11485	13	42	3	4	3	10	0.320908	-2.22604	0.0583513	low-molecular-weight cysteine-rich 11
AT5G64120.1	AT5G64120	31	12	10	55	42	77	1.68345	1.20155	0.0583513	Peroxidase superfamily protein
AT2G38180.1	AT2G38180	232	226	177	393	515	416	4.74207	0.514565	0.0583967	SGNH hydrolase-type esterase superfamily protein
AT1G01060.3	AT1G01060	835	571	1642	991	804	546	6.38612	-1.0345	0.0584008	Homeodomain-like superfamily protein
AT2G21940.2	AT2G21940	279	242	221	226	227	292	4.43609	-0.544313	0.0586073	shikimate kinase 1
AT4G14690.1	AT4G14690	159	167	175	195	144	119	3.82749	-0.705527	0.0586753	Chlorophyll A-B binding family protein
AT1G69840.6	AT1G69840	408	803	288	847	1185	1964	6.18754	0.894131	0.0587323	SPFH/Band 7/PHB domain-containing membrane-associated protein family
AT1G69840.5	AT1G69840	409	803	290	847	1186	1964	6.18889	0.891266	0.0587897	SPFH/Band 7/PHB domain-containing membrane-associated protein family
AT5G53130.1	AT5G53130	382	391	279	636	671	832	5.44213	0.482664	0.0587897	cyclic nucleotide gated channel 1
AT2G25600.1	AT2G25600	73	314	28	26	40	96	3.13351	-1.83628	0.0588388	Shaker pollen inward K+ channel
AT1G79250.2	AT1G79250	13	29	4	6	3	9	0.115793	-1.82874	0.0590298	AGC kinase 1.7
AT1G79250.1	AT1G79250	13	29	4	6	3	9	0.115793	-1.82874	0.0590318	AGC kinase 1.7
AT3G13080.3	AT3G13080	210	196	137	378	367	369	4.49971	0.499559	0.059216	multidrug resistance-associated protein 3
AT3G30247.1	AT3G30247	27	3	11	26	76	92	1.7194	1.72337	0.059216	Protein of unknown function (DUF784)
AT5G19580.1	AT5G19580	1562	6209	830	544	942	2440	7.56433	-1.621	0.059216	glyoxal oxidase-related protein
AT1G69840.4	AT1G69840	414	815	289	865	1195	1972	6.20193	0.889523	0.0592841	SPFH/Band 7/PHB domain-containing membrane-associated protein family
AT5G12850.1	AT5G12850	355	287	283	616	629	626	5.25744	0.463168	0.0592841	CCCH-type zinc finger protein with ARM repeat domain
AT5G03210.1	AT5G03210	2	5	2	19	9	18	-0.123533	1.77404	0.0593666	unknown protein
AT5G42200.1	AT5G42200	89	99	51	171	176	216	3.4533	0.708882	0.0593666	RING/U-box superfamily protein
AT3G26510.5	AT3G26510	182	198	136	100	146	202	3.826	-0.742579	0.059432	Octicosapeptide/Phox/Bem1p family protein
AT1G01570.1	AT1G01570	94	88	65	71	76	69	2.7744	-0.732776	0.0596654	Protein of unknown function (DUF604)
AT2G37620.1	AT2G37620	532	564	354	1041	1002	842	5.87988	0.456616	0.0596654	actin 1
AT4G24350.2	AT4G24350	109	80	53	154	197	224	3.4774	0.728037	0.0598049	Phosphorylase superfamily protein
AT3G26420.1	AT3G26420	1659	1509	1061	1401	1552	1591	6.97305	-0.42931	0.0599578	RNA-binding (RRM/RBD/RNP motifs) family protein with retrovirus zinc finger-like domain
AT4G29110.1	AT4G29110	6	8	9	19	32	35	0.725542	1.32934	0.0599578	unknown protein
AT5G20130.1	AT5G20130	612	542	389	536	527	582	5.51546	-0.441804	0.0599578	unknown protein
AT1G69840.1	AT1G69840	425	812	302	864	1199	1964	6.20827	0.866073	0.0599914	SPFH/Band 7/PHB domain-containing membrane-associated protein family
AT3G23480.2	AT3G23480	39	38	29	65	100	140	2.51036	0.982172	0.06006	Cyclopropane-fatty-acyl-phospholipid synthase
AT4G15450.1	AT4G15450	520	360	361	826	804	871	5.67242	0.465819	0.0600936	Senescence/dehydration-associated protein-related
AT5G42340.1	AT5G42340	18	46	7	3	5	17	0.638509	-1.98026	0.0601408	Plant U-Box 15
AT1G69840.7	AT1G69840	411	806	293	849	1189	1965	6.19306	0.885387	0.0601822	SPFH/Band 7/PHB domain-containing membrane-associated protein family
AT5G10660.1	AT5G10660	15	74	15	5	12	22	1.17872	-1.92055	0.0601822	calmodulin-binding protein-related
AT3G26430.1	AT3G26430	1687	1535	1080	1433	1590	1604	6.99835	-0.428013	0.0601913	GDSL-like Lipase/Acylhydrolase superfamily protein
AT4G25730.1	AT4G25730	1489	1395	861	1306	1177	1434	6.77621	-0.46063	0.0602893	FtsJ-like methyltransferase family protein
AT5G54910.1	AT5G54910	377	487	238	371	318	386	4.97318	-0.563419	0.0603725	DEA(D/H)-box RNA helicase family protein
AT1G66760.2	AT1G66760	48	47	49	118	90	228	2.99017	1.03225	0.0604348	MATE efflux family protein
[truncated: 30,228 more rows]
