# Supplementary material for: A CRC–MYB-mediated local chromatin loop at the MAB4 locus determines auxin-mediated nectary size in Arabidopsis thaliana
Source: Research Square preprint supplement (doi:10.21203/rs.3.rs-7421252/v1), 2025-09-07
Supplement: Supplementary file 8 [file 997a1bda85705e98f2b93053.xlsx]

## Sheet: Sheet1
Supplementary Data 7. Cis-element identification using MYB57-GFP ChIP-seq data.
Motif Name	Consensus	P-value	Log P-value	q-value (Benjamini)	# of Target Sequences with Motif(of 9809)	% of Target Sequences with Motif	# of Background Sequences with Motif(of 37256)	% of Background Sequences with Motif
PCF/Arabidopsis-Promoters/Homer	NNWWWTGGGCYTDDN	1e-568	-1310	0	2920	0.2977	4038.5	0.1084
VRN1(ABI3VP1)/col-VRN1-DAP-Seq(GSE60143)/Homer	TTTTTTTTTT	1e-443	-1022	0	3929	0.4005	7492.5	0.2011
REM19(REM)/colamp-REM19-DAP-Seq(GSE60143)/Homer	AAAAAAAA	1e-327	-753.9	0	6900	0.7034	19036	0.5111
E-box/Arabidopsis-Promoters/Homer	GCCACGTG	1e-259	-597.2	0	2024	0.2063	3410.7	0.0916
RLR1?/SacCer-Promoters/Homer	WTTTTCYYTTTT	1e-258	-594.2	0	5935	0.605	16098.4	0.4322
ABF1(bZIP)/Arabidopsis-ABF1-ChIP-Seq(GSE80564)/Homer	CACGTGGC	1e-241	-555.2	0	2411	0.2458	4588.7	0.1232
c-Myc(bHLH)/LNCAP-cMyc-ChIP-Seq(Unpublished)/Homer	VCCACGTG	1e-235	-542.3	0	1805	0.184	2993.3	0.0804
CLOCK(bHLH)/Liver-Clock-ChIP-Seq(GSE39860)/Homer	GHCACGTG	1e-220	-507.6	0	2019	0.2058	3659.9	0.0983
ABI5(bZIP)/col-ABI5-DAP-Seq(GSE60143)/Homer	GCCACGTG	1e-220	-507.3	0	1868	0.1904	3256.3	0.0874
bHLH34(bHLH)/colamp-bHLH34-DAP-Seq(GSE60143)/Homer	HGWGRHWGACACGTG	1e-214	-494.4	0	1523	0.1552	2407.6	0.0646
n-Myc(bHLH)/mES-nMyc-ChIP-Seq(GSE11431)/Homer	VRCCACGTGG	1e-213	-490.9	0	1897	0.1934	3382.4	0.0908
At4g36780(BZR)/col-At4g36780-DAP-Seq(GSE60143)/Homer	NNNNNNCACGTGNNN	1e-207	-477.5	0	1502	0.1531	2398.7	0.0644
At1g78700(BZR)/col-At1g78700-DAP-Seq(GSE60143)/Homer	NNNNCACGTGNNNNN	1e-207	-476.9	0	1478	0.1507	2340.2	0.0628
ABF2(bZIP)/col-ABF2-DAP-Seq(GSE60143)/Homer	KGMCACGTGDCMHHH	1e-200	-462.7	0	1489	0.1518	2404.8	0.0646
IBL1(bHLH)/Seedling-IBL1-ChIP-Seq(GSE51120)/Homer	CACGTGCC	1e-194	-448.2	0	3308	0.3372	7730	0.2075
bZIP68(bZIP)/col-bZIP68-DAP-Seq(GSE60143)/Homer	WGCCACGTGK	1e-194	-448.1	0	1870	0.1906	3444.2	0.0925
Max(bHLH)/K562-Max-ChIP-Seq(GSE31477)/Homer	RCCACGTGGYYN	1e-192	-443.6	0	2032	0.2071	3906.1	0.1049
c-Myc(bHLH)/mES-cMyc-ChIP-Seq(GSE11431)/Homer	VVCCACGTGG	1e-183	-421.7	0	1397	0.1424	2282.8	0.0613
bZIP16(bZIP)/colamp-bZIP16-DAP-Seq(GSE60143)/Homer	TGCCACGTGD	1e-183	-421.7	0	1665	0.1697	2976.6	0.0799
bZIP28(bZIP)/col-bZIP28-DAP-Seq(GSE60143)/Homer	TGCCACGTSABH	1e-182	-421.2	0	1638	0.167	2906.3	0.078
AREB3(bZIP)/col-AREB3-DAP-Seq(GSE60143)/Homer	NKGMCACGTGDCMNN	1e-182	-420.1	0	1838	0.1874	3449.1	0.0926
GBF6(bZIP)/colamp-GBF6-DAP-Seq(GSE60143)/Homer	WWTGMCACGTCABCW	1e-180	-416.1	0	1584	0.1615	2779.8	0.0746
GBF5(bZIP)/colamp-GBF5-DAP-Seq(GSE60143)/Homer	WKNWSACGTGGCAWN	1e-179	-412.8	0	1754	0.1788	3244.1	0.0871
bZIP53(bZIP)/colamp-bZIP53-DAP-Seq(GSE60143)/Homer	NDNHSACGTGKMNNN	1e-177	-409.4	0	1896	0.1933	3646.2	0.0979
bZIP48(bZIP)/colamp-bZIP48-DAP-Seq(GSE60143)/Homer	DDWWKVTSACGTGGC	1e-172	-396.3	0	1889	0.1926	3673.4	0.0986
bZIP3(bZIP)/col-bZIP3-DAP-Seq(GSE60143)/Homer	DWKNHSACGTGGCAD	1e-170	-392.1	0	2262	0.2306	4762.9	0.1279
GBF3(bZIP)/Arabidopsis-GBF3-ChIP-Seq(GSE80564)/Homer	TGCCACGTSAYC	1e-169	-389.7	0	1777	0.1811	3385.7	0.0909
PIF4(bHLH)/Seedling-PIF4-ChIP-Seq(GSE35315)/Homer	NNBCACGTGN	1e-166	-383.3	0	3049	0.3108	7222.3	0.1939
NPAS2(bHLH)/Liver-NPAS2-ChIP-Seq(GSE39860)/Homer	KCCACGTGAC	1e-165	-382	0	2646	0.2697	5964.9	0.1601
MNT(bHLH)/HepG2-MNT-ChIP-Seq(Encode)/Homer	DGCACACGTG	1e-164	-377.8	0	2806	0.286	6481.4	0.174
SPCH(bHLH)/Seedling-SPCH-ChIP-Seq(GSE57497)/Homer	WNBCACGTGA	1e-163	-376.9	0	3490	0.3558	8689.2	0.2333
FRS9(ND)/col-FRS9-DAP-Seq(GSE60143)/Homer	RGAGAGAGAAAG	1e-160	-369.9	0	1530	0.156	2780.1	0.0746
MYB57(MYB)/col-MYB57-DAP-Seq(GSE60143)/Homer	TTACCTAACT	1e-159	-368.2	0	2575	0.2625	5810.3	0.156
Pho4(bHLH)/Yeast-Pho4-ChIP-Seq(GSE29506)/Homer	AAGCACGTGBGD	1e-156	-360.3	0	936	0.0954	1322.5	0.0355
BOS1(MYB)/col-BOS1-DAP-Seq(GSE60143)/Homer	NNRCCTAACT	1e-154	-356.7	0	3688	0.3759	9465.6	0.2541
USF1(bHLH)/GM12878-Usf1-ChIP-Seq(GSE32465)/Homer	SGTCACGTGR	1e-152	-350.3	0	1514	0.1543	2801.7	0.0752
MYB116(MYB)/colamp-MYB116-DAP-Seq(GSE60143)/Homer	AGTTAGGCAN	1e-151	-349.9	0	2679	0.2731	6221.9	0.167
bHLHE40(bHLH)/HepG2-BHLHE40-ChIP-Seq(GSE31477)/Homer	KCACGTGMCN	1e-145	-336.1	0	1163	0.1186	1928.8	0.0518
PIF5ox(bHLH)/Arabidopsis-PIF5ox-ChIP-Seq(GSE35062)/Homer	BCACGTGVDN	1e-143	-330.4	0	2599	0.2649	6070	0.163
GAGA-repeat/Arabidopsis-Promoters/Homer	CTCTCTCTCY	1e-137	-317.6	0	2954	0.3011	7267.1	0.1951
BAM8(BES1)/col-BAM8-DAP-Seq(GSE60143)/Homer	NNWSACACGTGTSWN	1e-137	-316.6	0	958	0.0977	1476	0.0396
BIM2(bHLH)/col-BIM2-DAP-Seq(GSE60143)/Homer	NNNNCACGTGNN	1e-134	-309.3	0	2753	0.2806	6667.7	0.179
Pho2(bHLH)/Yeast-Pho2-ChIP-Seq(GSE29506)/Homer	CCCACGTGCT	1e-133	-307.9	0	1095	0.1116	1836.2	0.0493
TCP7(TCP)/col-TCP7-DAP-Seq(GSE60143)/Homer	GTGGGSCCCACHHNN	1e-132	-304	0	851	0.0867	1252.5	0.0336
bHLHE41(bHLH)/proB-Bhlhe41-ChIP-Seq(GSE93764)/Homer	KCACGTGMCN	1e-126	-291.1	0	2652	0.2703	6445	0.173
At4g18890(BZR)/col-At4g18890-DAP-Seq(GSE60143)/Homer	NDBRCACGTGYR	1e-126	-291.1	0	818	0.0834	1205.4	0.0324
BPC6(BBRBPC)/col-BPC6-DAP-Seq(GSE60143)/Homer	YTYTCTCTCTCTCTA	1e-122	-282.3	0	822	0.0838	1235.7	0.0332
MYB62(MYB)/colamp-MYB62-DAP-Seq(GSE60143)/Homer	NTACCTAACT	1e-121	-280.2	0	4377	0.4462	12359.4	0.3318
PIF7(bHLH)/col-PIF7-DAP-Seq(GSE60143)/Homer	CCACGTGGNH	1e-120	-278.5	0	813	0.0829	1223.7	0.0329
AT3G10580(MYBrelated)/colamp-AT3G10580-DAP-Seq(GSE60143)/Homer	TACCTAACWNHW	1e-118	-273.4	0	2142	0.2183	4942.1	0.1327
GT3a(Trihelix)/col-GT3a-DAP-Seq(GSE60143)/Homer	WNACACGTGTYWWAW	1e-111	-257	0	1377	0.1404	2761.9	0.0741
bHLH74(bHLH)/col-bHLH74-DAP-Seq(GSE60143)/Homer	DRATCACGTGAB	1e-108	-249.2	0	782	0.0797	1222.5	0.0328
SEP3(MADS)/Arabidoposis-Flower-Sep3-ChIP-Seq/Homer	CCAAAAAGGG	1e-107	-247.4	0	6026	0.6143	18749.8	0.5034
MYB10(MYB)/col-MYB10-DAP-Seq(GSE60143)/Homer	YCCACCTACCHH	1e-106	-244.5	0	1640	0.1672	3571.3	0.0959
BMAL1(bHLH)/Liver-Bmal1-ChIP-Seq(GSE39860)/Homer	GNCACGTG	1e-104	-239.8	0	3974	0.4051	11238	0.3017
At5g08330(TCP)/col-At5g08330-DAP-Seq(GSE60143)/Homer	GGRCCCAC	1e-103	-238.6	0	847	0.0863	1410.6	0.0379
HY5(bZIP)/colamp-HY5-DAP-Seq(GSE60143)/Homer	RRTSACGTSD	1e-101	-233.6	0	3303	0.3367	8960.7	0.2406
MYB92(MYB)/colamp-MYB92-DAP-Seq(GSE60143)/Homer	GGTAGGTR	1e-100	-231.8	0	2756	0.2809	7141.4	0.1917
Usf2(bHLH)/C2C12-Usf2-ChIP-Seq(GSE36030)/Homer	GTCACGTGGT	1e-100	-230.8	0	1170	0.1193	2287.4	0.0614
MYB27(MYB)/colamp-MYB27-DAP-Seq(GSE60143)/Homer	TACCTAACWT	1e-98	-226.4	0	1313	0.1338	2704.6	0.0726
MYB121(MYB)/col-MYB121-DAP-Seq(GSE60143)/Homer	YNTACCTAACWW	1e-96	-223.2	0	1986	0.2024	4727.5	0.1269
BPC1(BBRBPC)/colamp-BPC1-DAP-Seq(GSE60143)/Homer	GARGAGAGAGAA	1e-94	-216.5	0	2676	0.2728	6980.5	0.1874
FAR1(FAR1)/col-FAR1-DAP-Seq(GSE60143)/Homer	TKNNNYYCACGCGCY	1e-90	-207.4	0	530	0.054	734.9	0.0197
NPAS(bHLH)/Liver-NPAS-ChIP-Seq(GSE39860)/Homer	NVCACGTG	1e-86	-199.4	0	3884	0.3959	11246.9	0.3019
MYB3(MYB)/Arabidopsis-MYB3-ChIP-Seq(GSE80564)/Homer	GKTAGGTRGG	1e-84	-193.7	0	4137	0.4217	12197.7	0.3275
FHY3(FAR1)/Arabidopsis-FHY3-ChIP-Seq(GSE30711)/Homer	HHCACGCGCBTN	1e-80	-185.2	0	860	0.0877	1613.2	0.0433
MYB99(MYB)/colamp-MYB99-DAP-Seq(GSE60143)/Homer	GGTAGGTG	1e-79	-184.1	0	2755	0.2808	7474.4	0.2007
RIN(MADS)/Tomato-RIN-ChIP-Seq(GSE116581)/Homer	CYAAAAWWGG	1e-78	-180.5	0	5838	0.5951	18641.4	0.5005
BIM1(bHLH)/colamp-BIM1-DAP-Seq(GSE60143)/Homer	NNNNNNVTCACGTGM	1e-76	-177	0	563	0.0574	882.8	0.0237
MYB74(MYB)/colamp-MYB74-DAP-Seq(GSE60143)/Homer	YYYACCTACCWH	1e-75	-174.1	0	2797	0.2851	7693.5	0.2065
Cbf1(bHLH)/Yeast-Cbf1-ChIP-Seq(GSE29506)/Homer	TCACGTGAYH	1e-75	-173.1	0	941	0.0959	1879.4	0.0505
BIM3(bHLH)/col-BIM3-DAP-Seq(GSE60143)/Homer	TWVTCACGTGAB	1e-75	-172.7	0	590	0.0601	959.7	0.0258
MYB51(MYB)/col-MYB51-DAP-Seq(GSE60143)/Homer	GGTAGGTG	1e-73	-169.6	0	2418	0.2465	6460.2	0.1734
MYB4(MYB)/col200-MYB4-DAP-Seq(GSE60143)/Homer	WAGKTAGGTARR	1e-73	-168.7	0	2939	0.2996	8219.6	0.2207
At1g72010(TCP)/colamp-At1g72010-DAP-Seq(GSE60143)/Homer	GGDCCCAC	1e-69	-159.8	0	584	0.0595	981.8	0.0264
Unknown1/Arabidopsis-Promoters/Homer	RGGGTAWWWTHGTAA	1e-69	-159.5	0	861	0.0878	1712.1	0.046
At1g14580(C2H2)/colamp-At1g14580-DAP-Seq(GSE60143)/Homer	CASAAAAMGACAAAA	1e-69	-159.4	0	1836	0.1872	4641.8	0.1246
TCP3(TCP)/colamp-TCP3-DAP-Seq(GSE60143)/Homer	WGTGGTCCCAAHWWW	1e-68	-156.9	0	699	0.0713	1285.7	0.0345
MYB63(MYB)/col-MYB63-DAP-Seq(GSE60143)/Homer	BHYACCWACCHH	1e-67	-154.8	0	1696	0.1729	4227	0.1135
MYB67(MYB)/col-MYB67-DAP-Seq(GSE60143)/Homer	YYYACCTAAC	1e-65	-151	0	3538	0.3607	10458.5	0.2808
MYB17(MYB)/colamp-MYB17-DAP-Seq(GSE60143)/Homer	GGTAGGTGRG	1e-65	-150.6	0	1429	0.1457	3421.2	0.0918
HEB(bHLH)/mES-Heb-ChIP-Seq(GSE53233)/Homer	VCAGCTGBNN	1e-62	-143.1	0	1651	0.1683	4161.5	0.1117
TCP16(TCP)/colamp-TCP16-DAP-Seq(GSE60143)/Homer	GTGGDCCYNNNNNNN	1e-61	-142.7	0	673	0.0686	1266.8	0.034
AT4G26030(C2H2)/col-AT4G26030-DAP-Seq(GSE60143)/Homer	BYYACCWACY	1e-59	-137.1	0	3427	0.3493	10203	0.2739
SeqBias: TA-repeat	TATATATATA	1e-58	-134.4	0	9060	0.9235	32504	0.8726
MYB58(MYB)/colamp-MYB58-DAP-Seq(GSE60143)/Homer	YYYACCWACC	1e-56	-129	0	3335	0.34	9959.7	0.2674
ZIM(C2C2gata)/col-ZIM-DAP-Seq(GSE60143)/Homer	ATCSRACGGTYRAGA	1e-55	-127.8	0	449	0.0458	739.6	0.0199
MYB39(MYB)/col-MYB39-DAP-Seq(GSE60143)/Homer	WWAARKTAGGTGRAA	1e-54	-124.8	0	1070	0.1091	2478.7	0.0665
MYB55(MYB)/colamp-MYB55-DAP-Seq(GSE60143)/Homer	YACCWAMC	1e-54	-124.4	0	3715	0.3787	11360.5	0.305
At1g69690(TCP)/colamp-At1g69690-DAP-Seq(GSE60143)/Homer	NHGTGGGGCCCACHW	1e-53	-123.4	0	424	0.0432	690.6	0.0185
BZR1(BZR)/col-BZR1-DAP-Seq(GSE60143)/Homer	NNCRCACGTGCG	1e-53	-123.3	0	333	0.0339	476.2	0.0128
ZNF711(Zf)/SHSY5Y-ZNF711-ChIP-Seq(GSE20673)/Homer	AGGCCTAG	1e-53	-123.2	0	1393	0.142	3480.1	0.0934
ATY19(MYB)/col-ATY19-DAP-Seq(GSE60143)/Homer	YYCACCWACCAT	1e-53	-123.1	0	2477	0.2525	7040.3	0.189
CAMTA1(CAMTA)/col-CAMTA1-DAP-Seq(GSE60143)/Homer	WWAACGCGTT	1e-53	-122.1	0	1630	0.1662	4240.8	0.1139
MYB40(MYB)/col-MYB40-DAP-Seq(GSE60143)/Homer	TGGTAGGTRARA	1e-51	-119.5	0	1318	0.1344	3269.5	0.0878
JKD(C2H2)/col-JKD-DAP-Seq(GSE60143)/Homer	TTTTGTCGTTTT	1e-51	-119.5	0	1661	0.1693	4359.4	0.117
IDD2(C2H2)/colamp-IDD2-DAP-Seq(GSE60143)/Homer	HAVAAAAMGACAAAA	1e-49	-114.8	0	1266	0.1291	3138.6	0.0843
MYB13(MYB)/col-MYB13-DAP-Seq(GSE60143)/Homer	HYCACCWACCHH	1e-48	-112.4	0	2220	0.2263	6267.8	0.1683
Trl(Zf)/S2-GAGAfactor-ChIP-Seq(GSE40646)/Homer	RGAGAGAG	1e-48	-110.6	0	4988	0.5085	16198.4	0.4349
O2(bZIP)/Corn-O2-ChIP-Seq(GSE63991)/Homer	GCTGACGTGGCA	1e-47	-110.1	0	443	0.0452	777.3	0.0209
ZML1(C2C2gata)/colamp-ZML1-DAP-Seq(GSE60143)/Homer	ATCWYRACCGTTSRW	1e-46	-106.4	0	443	0.0452	789.7	0.0212
bZIP44(bZIP)/colamp-bZIP44-DAP-Seq(GSE60143)/Homer	NDTGCCACGTCAGCH	1e-45	-105.5	0	282	0.0287	401.6	0.0108
MYB93(MYB)/colamp-MYB93-DAP-Seq(GSE60143)/Homer	GGTAGGTGRD	1e-43	-99.78	0	3558	0.3627	11078.7	0.2974
NUC(C2H2)/col-NUC-DAP-Seq(GSE60143)/Homer	HAVAAAACGACAAAA	1e-42	-98.79	0	987	0.1006	2378.1	0.0638
MYB61(MYB)/colamp-MYB61-DAP-Seq(GSE60143)/Homer	HCYACCTACC	1e-42	-98.48	0	4334	0.4418	13921.3	0.3737
TCP20(TCP)/col-TCP20-DAP-Seq(GSE60143)/Homer	GGDCCCAC	1e-42	-97.47	0	376	0.0383	647.5	0.0174
MYB41(MYB)/col-MYB41-DAP-Seq(GSE60143)/Homer	BYTYACCTAA	1e-42	-96.73	0	1019	0.1039	2489.2	0.0668
MYB49(MYB)/col-MYB49-DAP-Seq(GSE60143)/Homer	ARKTAGGTRR	1e-39	-90.84	0	4316	0.44	13956.1	0.3747
IDD7(C2H2)/col-IDD7-DAP-Seq(GSE60143)/Homer	TTTGTCKTTTTN	1e-37	-86.64	0	2277	0.2321	6716.3	0.1803
At3g45610(C2C2dof)/col-At3g45610-DAP-Seq(GSE60143)/Homer	TWACTTTTTS	1e-37	-86.19	0	6789	0.692	23472	0.6301
TCP1(TCP)/col-TCP1-DAP-Seq(GSE60143)/Homer	GGGGGCCCMMCN	1e-37	-86.17	0	309	0.0315	514.1	0.0138
DPL-1(E2F)/cElegans-Adult-ChIP-Seq(modEncode)/Homer	TAGCGCGC	1e-37	-85.51	0	871	0.0888	2107	0.0566
MYB107(MYB)/col-MYB107-DAP-Seq(GSE60143)/Homer	RGTWGGTRRR	1e-35	-82.05	0	4492	0.4579	14731.7	0.3955
TAGL1(MADS)/Tomato-TAGL1-ChIP-Seq(GSE116581)/Homer	CCAAAAATRG	1e-35	-82.02	0	4740	0.4832	15656.9	0.4203
IDD5(C2H2)/colamp-IDD5-DAP-Seq(GSE60143)/Homer	TTTTGTCTTTTTBTK	1e-35	-80.97	0	4938	0.5034	16414.5	0.4407
ZFX(Zf)/mES-Zfx-ChIP-Seq(GSE11431)/Homer	AGGCCTRG	1e-34	-79.95	0	850	0.0866	2077.6	0.0558
MS188(MYB)/colamp-MS188-DAP-Seq(GSE60143)/Homer	WARKTAGGTRRA	1e-34	-79.83	0	3835	0.3909	12342	0.3313
LMI1(HB)/colamp-LMI1-DAP-Seq(GSE60143)/Homer	AATTATTG	1e-34	-79.77	0	4532	0.462	14914	0.4004
dof43(C2C2dof)/colamp-dof43-DAP-Seq(GSE60143)/Homer	NAAAAAGTDA	1e-34	-79.05	0	6121	0.624	20960.8	0.5627
HAT5(Homeobox)/colamp-HAT5-DAP-Seq(GSE60143)/Homer	DCAATWATTG	1e-33	-77.84	0	1335	0.1361	3634.2	0.0976
MGP(C2H2)/colamp-MGP-DAP-Seq(GSE60143)/Homer	TTTTGTCGTTTW	1e-33	-77.43	0	1800	0.1835	5185.9	0.1392
At5g66730(C2H2)/colamp-At5g66730-DAP-Seq(GSE60143)/Homer	TTTGTCKTTTTK	1e-33	-77.23	0	1752	0.1786	5025.9	0.1349
HIF-1b(HLH)/T47D-HIF1b-ChIP-Seq(GSE59937)/Homer	RTACGTGC	1e-33	-76.87	0	2937	0.2994	9144.6	0.2455
ATHB21(HB)/colamp-ATHB21-DAP-Seq(GSE60143)/Homer	YCAATWAT	1e-31	-71.56	0	3266	0.3329	10394.1	0.279
AT5G59990(C2C2COlike)/colamp-AT5G59990-DAP-Seq(GSE60143)/Homer	TCTCAACCGTTCATT	1e-30	-70.66	0	401	0.0409	809.9	0.0217
ATHB53(HB)/col-ATHB53-DAP-Seq(GSE60143)/Homer	CAATAATT	1e-30	-70.45	0	3667	0.3738	11864.9	0.3185
CRE(bZIP)/Promoter/Homer	CSGTGACGTCAC	1e-30	-70.37	0	513	0.0523	1126.2	0.0302
AtIDD11(C2H2)/colamp-AtIDD11-DAP-Seq(GSE60143)/Homer	TTTGTCGTTT	1e-30	-69.37	0	2052	0.2092	6134.1	0.1647
MYB96(MYB)/colamp-MYB96-DAP-Seq(GSE60143)/Homer	WGGTRGTTGG	1e-29	-68.59	0	2625	0.2676	8147	0.2187
MITF(bHLH)/MastCells-MITF-ChIP-Seq(GSE48085)/Homer	RTCATGTGAC	1e-29	-68.4	0	1957	0.1995	5818.6	0.1562
Unknown4/Arabidopsis-Promoters/Homer	CKTCKTCTTY	1e-29	-67.68	0	4468	0.4555	14860.2	0.3989
bHLH10(bHLH)/colamp-bHLH10-DAP-Seq(GSE60143)/Homer	YACCGACA	1e-29	-67.18	0	842	0.0858	2139.3	0.0574
TFE3(bHLH)/MEF-TFE3-ChIP-Seq(GSE75757)/Homer	GTCACGTGACYV	1e-28	-66.5	0	300	0.0306	554	0.0149
bHLH18(bHLH)/col-bHLH18-DAP-Seq(GSE60143)/Homer	CACGTGTTYCACGTG	1e-28	-65.52	0	161	0.0164	219.7	0.0059
CAMTA5(CAMTA)/col-CAMTA5-DAP-Seq(GSE60143)/Homer	ACGCGTTTTANACRC	1e-28	-64.66	0	1368	0.1394	3864.2	0.1037
IDD4(C2H2)/col-IDD4-DAP-Seq(GSE60143)/Homer	TTTGTCTTTWTB	1e-27	-64.3	0	5180	0.528	17591	0.4723
BBX31(Orphan)/col-BBX31-DAP-Seq(GSE60143)/Homer	NAAAAAGTDA	1e-27	-64.13	0	6415	0.6539	22341.5	0.5998
ANL2(HB)/col-ANL2-DAP-Seq(GSE60143)/Homer	CATTAATTGC	1e-27	-63.6	0	2933	0.299	9311.1	0.25
Unknown(Homeobox)/Limb-p300-ChIP-Seq/Homer	SSCMATWAAA	1e-27	-62.55	0	2900	0.2956	9208.8	0.2472
AT1G12630(AP2EREBP)/colamp-AT1G12630-DAP-Seq(GSE60143)/Homer	TGTCGGCA	1e-26	-62.15	0	1154	0.1176	3181.4	0.0854
Ptf1a(bHLH)/Panc1-Ptf1a-ChIP-Seq(GSE47459)/Homer	ACAGCTGTTN	1e-26	-60.87	0	2325	0.237	7191.6	0.1931
AT1G77200(AP2EREBP)/colamp-AT1G77200-DAP-Seq(GSE60143)/Homer	ACCGACAHWD	1e-26	-60.73	0	2146	0.2188	6566.5	0.1763
PABPC1(?)/MEL-PABC1-CLIP-Seq(GSE69755)/Homer	HAATAAAGNN	1e-26	-60.47	0	7420	0.7564	26375.5	0.7081
AT5G02460(C2C2dof)/col-AT5G02460-DAP-Seq(GSE60143)/Homer	CHCCTTTT	1e-26	-60.28	0	7529	0.7675	26816	0.7199
At1g64620(C2C2dof)/colamp-At1g64620-DAP-Seq(GSE60143)/Homer	CACTTTTT	1e-26	-60.05	0	6138	0.6257	21334.8	0.5728
GAGA-repeat/SacCer-Promoters/Homer	CTYTCTYTCTCTCTC	1e-25	-59.47	0	8678	0.8846	31566.7	0.8475
At2g44940(AP2EREBP)/colamp-At2g44940-DAP-Seq(GSE60143)/Homer	NYACCGACAHNNNNN	1e-25	-59.38	0	776	0.0791	1989.4	0.0534
E-box(bHLH)/Promoter/Homer	SSGGTCACGTGA	1e-25	-58.84	0	194	0.0198	311.5	0.0084
CBF1(AP2EREBP)/colamp-CBF1-DAP-Seq(GSE60143)/Homer	YRCCGACATN	1e-25	-58.72	0	1611	0.1642	4745.9	0.1274
ZNF692(Zf)/HEK293-ZNF692.GFP-ChIP-Seq(GSE58341)/Homer	GTGGGCCCCA	1e-24	-56.86	0	175	0.0178	271	0.0073
At2g45680(TCP)/colamp-At2g45680-DAP-Seq(GSE60143)/Homer	GTGGGNCCCACNDND	1e-24	-56.02	0	203	0.0207	341.1	0.0092
TINY(AP2EREBP)/col-TINY-DAP-Seq(GSE60143)/Homer	NNCACCGACA	1e-24	-55.91	0	762	0.0777	1971.7	0.0529
At4g16750(AP2EREBP)/col-At4g16750-DAP-Seq(GSE60143)/Homer	HACCGACAHA	1e-23	-54.31	0	2157	0.2199	6690.1	0.1796
CEJ1(AP2EREBP)/col-CEJ1-DAP-Seq(GSE60143)/Homer	WWTGTCGGTG	1e-23	-54.08	0	2409	0.2456	7582.5	0.2036
AT3G60490(AP2EREBP)/colamp-AT3G60490-DAP-Seq(GSE60143)/Homer	NNRCCGACANNNNNN	1e-23	-53.77	0	859	0.0876	2297.2	0.0617
COG1(C2C2dof)/col-COG1-DAP-Seq(GSE60143)/Homer	DAAAAAGTGA	1e-23	-52.97	0	6125	0.6244	21411.9	0.5748
At4g28140(AP2EREBP)/colamp-At4g28140-DAP-Seq(GSE60143)/Homer	DCCACCGACCAW	1e-21	-50.21	0	767	0.0782	2032.3	0.0546
CRF10(AP2EREBP)/col100-CRF10-DAP-Seq(GSE60143)/Homer	DCCGCCGYHA	1e-21	-49.92	0	1863	0.1899	5722.9	0.1536
ERF38(AP2EREBP)/col-ERF38-DAP-Seq(GSE60143)/Homer	CACCGACA	1e-21	-49.53	0	1219	0.1243	3522.1	0.0946
DEAR3(AP2EREBP)/colamp-DEAR3-DAP-Seq(GSE60143)/Homer	BCACCGACAWNNNNN	1e-21	-49.31	0	1178	0.1201	3387.8	0.091
CArG(MADS)/PUER-Srf-ChIP-Seq(Sullivan_et_al.)/Homer	CCATATATGGNM	1e-21	-49.05	0	1041	0.1061	2934.7	0.0788
CBF2(AP2EREBP)/colamp-CBF2-DAP-Seq(GSE60143)/Homer	YBRCCGACATNNNNN	1e-21	-49.01	0	1399	0.1426	4136.3	0.111
At1g19210(AP2EREBP)/colamp-At1g19210-DAP-Seq(GSE60143)/Homer	HCACCGACCAHN	1e-21	-48.93	0	3059	0.3118	9994.4	0.2683
PTF1(TCP)/colamp-PTF1-DAP-Seq(GSE60143)/Homer	RDDGGGACCACA	1e-21	-48.55	0	125	0.0127	176.1	0.0047
EGL-5(Homeobox)/cElegans-L3-EGL5-ChIP-Seq(modEncode)/Homer	ATTTAATGGG	1e-20	-48.1	0	5971	0.6087	20909.6	0.5614
bHLH157(bHLH)/col-bHLH157-DAP-Seq(GSE60143)/Homer	KACACGTCTCTY	1e-20	-46.98	0	1060	0.1081	3018.7	0.081
bZIP42(bZIP)/colamp-bZIP42-DAP-Seq(GSE60143)/Homer	GCCACGTCAGCA	1e-20	-46.83	0	105	0.0107	136.6	0.0037
AT3G16280(AP2EREBP)/colamp-AT3G16280-DAP-Seq(GSE60143)/Homer	HCACCGACAHHDHHN	1e-20	-46.74	0	1314	0.1339	3874.2	0.104
Rap210(AP2EREBP)/col-Rap210-DAP-Seq(GSE60143)/Homer	TGTCGGCA	1e-20	-46.11	0	1438	0.1466	4304.9	0.1156
DEAR2(AP2EREBP)/colamp-DEAR2-DAP-Seq(GSE60143)/Homer	HCACCGACAWHD	1e-19	-45.99	0	2588	0.2638	8345	0.224
AT4G27900(C2C2COlike)/col-AT4G27900-DAP-Seq(GSE60143)/Homer	TCTCVACCGTTSATT	1e-19	-44.79	0	174	0.0177	303.2	0.0081
HDG1(Homeobox)/col100-HDG1-DAP-Seq(GSE60143)/Homer	DDYAATTAATGH	1e-19	-44.15	0	3503	0.3571	11700.3	0.3141
At1g22810(AP2EREBP)/colamp-At1g22810-DAP-Seq(GSE60143)/Homer	BCACCGACANNN	1e-18	-43.29	0	1157	0.1179	3383.5	0.0908
At4g32800(AP2EREBP)/colamp-At4g32800-DAP-Seq(GSE60143)/Homer	DYCACCGACAHWWWH	1e-18	-42.41	0	548	0.0559	1401.1	0.0376
At1g36060(AP2EREBP)/colamp-At1g36060-DAP-Seq(GSE60143)/Homer	NNWWKGTCGGTG	1e-18	-41.46	0	1717	0.175	5331.4	0.1431
SeqBias: CG bias	SSSSSSSSSS	1e-17	-40.65	0	6075	0.6193	21462.9	0.5762
CBF4(AP2EREBP)/colamp-CBF4-DAP-Seq(GSE60143)/Homer	NRCCGACDWNNNNNN	1e-17	-40.47	0	1945	0.1983	6146.3	0.165
SGR5(C2H2)/colamp-SGR5-DAP-Seq(GSE60143)/Homer	TTTGTCTTTTTT	1e-17	-40.11	0	2766	0.282	9088.7	0.244
CBF3(AP2EREBP)/colamp-CBF3-DAP-Seq(GSE60143)/Homer	YNRCCGACATNN	1e-17	-39.66	0	1257	0.1281	3766	0.1011
dof42(C2C2dof)/col-dof42-DAP-Seq(GSE60143)/Homer	AAAAAGGC	1e-17	-39.47	0	2277	0.2321	7341.4	0.1971
At4g31060(AP2EREBP)/colamp-At4g31060-DAP-Seq(GSE60143)/Homer	CACCGACAAW	1e-17	-39.39	0	1292	0.1317	3889.1	0.1044
ATHB40(HB)/col-ATHB40-DAP-Seq(GSE60143)/Homer	HCAATWATTG	1e-16	-38.55	0	4763	0.4855	16505.2	0.4431
PUCHI(AP2EREBP)/colamp-PUCHI-DAP-Seq(GSE60143)/Homer	GCGCCGTY	1e-16	-38.22	0	908	0.0926	2605.9	0.07
ATHB13(Homeobox)/col-ATHB13-DAP-Seq(GSE60143)/Homer	CAATAATT	1e-16	-37.9	0	5828	0.5941	20571.3	0.5523
Mef2b(MADS)/HEK293-Mef2b.V5-ChIP-Seq(GSE67450)/Homer	GCTATTTTTGGM	1e-16	-36.88	0	3524	0.3592	11921.2	0.32
MYB3R5(MYB)/col-MYB3R5-DAP-Seq(GSE60143)/Homer	THYAACGGTHAWAWT	1e-15	-36.24	0	906	0.0924	2620.6	0.0704
AT1G71450(AP2EREBP)/col-AT1G71450-DAP-Seq(GSE60143)/Homer	DHDWTGTCGGTG	1e-15	-35.61	0	3437	0.3504	11628	0.3122
TGA4(bZIP)/colamp-TGA4-DAP-Seq(GSE60143)/Homer	RTGACGTCAKCW	1e-14	-34.5	0	921	0.0939	2690.8	0.0722
RAP21(AP2EREBP)/colamp-RAP21-DAP-Seq(GSE60143)/Homer	BCACCGACAHNN	1e-14	-34.35	0	675	0.0688	1877	0.0504
TGA2(bZIP)/colamp-TGA2-DAP-Seq(GSE60143)/Homer	ACGTCAYCHH	1e-14	-34.28	0	2017	0.2056	6503.9	0.1746
DDF1(AP2EREBP)/col-DDF1-DAP-Seq(GSE60143)/Homer	GCCGACAT	1e-14	-34.09	0	1285	0.131	3936.2	0.1057
ERF105(AP2EREBP)/colamp-ERF105-DAP-Seq(GSE60143)/Homer	TGGCGGCT	1e-14	-33.76	0	1421	0.1449	4412.3	0.1185
HDG7(HB)/col-HDG7-DAP-Seq(GSE60143)/Homer	WGCATTTAATGC	1e-14	-33.6	0	831	0.0847	2399.6	0.0644
ERF104(AP2EREBP)/col-ERF104-DAP-Seq(GSE60143)/Homer	GGCGGCGG	1e-14	-32.79	0	1083	0.1104	3260.4	0.0875
TCP17(TCP)/col-TCP17-DAP-Seq(GSE60143)/Homer	GTGGTCCCCA	1e-14	-32.58	0	65	0.0066	79.6	0.0021
ESE3(AP2EREBP)/col-ESE3-DAP-Seq(GSE60143)/Homer	GACGGTGG	1e-13	-31.92	0	1756	0.179	5617.4	0.1508
MYB94(MYB)/col-MYB94-DAP-Seq(GSE60143)/Homer	WGGTRGTTGGKA	1e-13	-31.22	0	1009	0.1029	3028.5	0.0813
MYB30(MYB)/colamp-MYB30-DAP-Seq(GSE60143)/Homer	AGGTAGTTGG	1e-13	-30.68	0	2734	0.2787	9156.6	0.2458
SOC1(MADS)/Seedling-SOC1-ChIP-Seq(GSE45846)/Homer	TWCCAWWTWTGG	1e-13	-30.6	0	1824	0.1859	5881.1	0.1579
Unknown2/Arabidopsis-Promoters/Homer	AAACGACGTCGTTTT	1e-12	-29.93	0	409	0.0417	1061.3	0.0285
ATHB20(Homeobox)/colamp-ATHB20-DAP-Seq(GSE60143)/Homer	CAATHATT	1e-12	-29.7	0	2959	0.3016	9999	0.2684
AT1G28160(AP2EREBP)/colamp-AT1G28160-DAP-Seq(GSE60143)/Homer	GGCGGCGG	1e-12	-28.71	0	1795	0.183	5812.4	0.156
DREB2(AP2EREBP)/col-DREB2-DAP-Seq(GSE60143)/Homer	TMACCGACATWA	1e-12	-28.56	0	1253	0.1277	3906.6	0.1049
NFY(CCAAT)/Promoter/Homer	RGCCAATSRG	1e-12	-28.41	0	2680	0.2732	9008.1	0.2418
ERF3(AP2EREBP)/colamp-ERF3-DAP-Seq(GSE60143)/Homer	ATGGCGGCGG	1e-12	-28.33	0	1063	0.1084	3252.3	0.0873
DREB19(AP2EREBP)/colamp-DREB19-DAP-Seq(GSE60143)/Homer	AATGTCGGTK	1e-11	-27.18	0	1365	0.1391	4319.9	0.116
KLF5(Zf)/LoVo-KLF5-ChIP-Seq(GSE49402)/Homer	DGGGYGKGGC	1e-11	-27.05	0	526	0.0536	1461.7	0.0392
MYB83(MYB)/colamp-MYB83-DAP-Seq(GSE60143)/Homer	CACCAACCWH	1e-11	-26.83	0	5210	0.5311	18479.7	0.4961
At5g52660(MYBrelated)/colamp-At5g52660-DAP-Seq(GSE60143)/Homer	HAAAAATATCTW	1e-11	-26.77	0	3034	0.3093	10341.5	0.2776
RAP26(AP2EREBP)/colamp-RAP26-DAP-Seq(GSE60143)/Homer	HDATGGCGGCGG	1e-11	-26.3	0	2055	0.2095	6789.8	0.1823
ERF11(AP2EREBP)/col-ERF11-DAP-Seq(GSE60143)/Homer	RTGGCGGCGG	1e-11	-26.06	0	1387	0.1414	4415.5	0.1185
RAP212(AP2EREBP)/col-RAP212-DAP-Seq(GSE60143)/Homer	CGCCGCCATTTT	1e-11	-25.85	0	1347	0.1373	4278.1	0.1149
ERF9(AP2EREBP)/colamp-ERF9-DAP-Seq(GSE60143)/Homer	AWATGGCGGCGG	1e-11	-25.69	0	524	0.0534	1468.7	0.0394
AGL63(MADS)/col-AGL63-DAP-Seq(GSE60143)/Homer	TTCCAAWWWTGG	1e-11	-25.59	0	3676	0.3747	12744.7	0.3422
SPL13(SBP)/col-SPL13-DAP-Seq(GSE60143)/Homer	WAHTGTACGGAH	1e-11	-25.42	0	514	0.0524	1438.2	0.0386
DEAR5(AP2EREBP)/col-DEAR5-DAP-Seq(GSE60143)/Homer	NDWTGTCGGTGRWDN	1e-11	-25.36	0	512	0.0522	1432.7	0.0385
ERF13(AP2EREBP)/colamp-ERF13-DAP-Seq(GSE60143)/Homer	TYAGCCGCCATT	1e-10	-25.06	0	1464	0.1492	4704	0.1263
ESE1(AP2EREBP)/col-ESE1-DAP-Seq(GSE60143)/Homer	GGCGGCGG	1e-10	-24.98	0	713	0.0727	2104	0.0565
Mef2c(MADS)/GM12878-Mef2c-ChIP-Seq(GSE32465)/Homer	DCYAAAAATAGM	1e-10	-24.46	0	2240	0.2283	7496.8	0.2013
ERF4(AP2EREBP)/colamp-ERF4-DAP-Seq(GSE60143)/Homer	WDWTGGCGGCGG	1e-10	-24.27	0	1867	0.1903	6155.8	0.1653
ATHB18(Homeobox)/colamp-ATHB18-DAP-Seq(GSE60143)/Homer	YCAATSATTG	1e-10	-24.26	0	1294	0.1319	4119.9	0.1106
ERF115(AP2EREBP)/colamp-ERF115-DAP-Seq(GSE60143)/Homer	WTKRCGGCGB	1e-10	-24.19	0	2288	0.2332	7676.2	0.2061
TGA6(bZIP)/colamp-TGA6-DAP-Seq(GSE60143)/Homer	TGACGTCABC	1e-10	-23.91	0	1793	0.1828	5897.9	0.1583
SVP(MADS)/col-SVP-DAP-Seq(GSE60143)/Homer	ANTTWCCHAATTTGG	1e-10	-23.85	0	2858	0.2913	9765.8	0.2622
ERF5(AP2EREBP)/colamp-ERF5-DAP-Seq(GSE60143)/Homer	DCMGCCGCCA	1e-10	-23.49	0	603	0.0615	1753.5	0.0471
AT4G18450(AP2EREBP)/col-AT4G18450-DAP-Seq(GSE60143)/Homer	ATGGCGGCKG	1e-10	-23.16	0	583	0.0594	1690	0.0454
bHLH28(bHLH)/col-bHLH28-DAP-Seq(GSE60143)/Homer	NHHTGTACGGAH	1e-10	-23.16	0	1330	0.1356	4265.3	0.1145
Sp5(Zf)/mES-Sp5.Flag-ChIP-Seq(GSE72989)/Homer	RGKGGGCGGAGC	1e-09	-22.84	0	384	0.0391	1041.1	0.028
KLF14(Zf)/HEK293-KLF14.GFP-ChIP-Seq(GSE58341)/Homer	RGKGGGCGKGGC	1e-09	-22.62	0	588	0.0599	1713.7	0.046
SPL14(SBP)/col-SPL14-DAP-Seq(GSE60143)/Homer	NNWHTGTACGGAHNH	1e-09	-22.32	0	711	0.0725	2131.4	0.0572
dof45(C2C2dof)/col-dof45-DAP-Seq(GSE60143)/Homer	NVAWAAAGTN	1e-09	-22.03	0	8244	0.8404	30412.4	0.8165
bZIP50(bZIP)/colamp-bZIP50-DAP-Seq(GSE60143)/Homer	GATGACGTCA	1e-09	-21.72	0	2987	0.3045	10294.5	0.2764
ERF73(AP2EREBP)/col-ERF73-DAP-Seq(GSE60143)/Homer	CCGCCGCC	1e-09	-21.32	0	584	0.0595	1715.5	0.0461
ERF10(AP2EREBP)/col-ERF10-DAP-Seq(GSE60143)/Homer	RTGGCGGCGG	1e-09	-21.24	0	1006	0.1025	3162.7	0.0849
ATHB6(Homeobox)/Arabidopsis-HB6-ChIP-Seq(GSE80564)/Homer	CAATNATTBN	1e-09	-20.74	0	4089	0.4168	14420.3	0.3871
SeqBias: CG-repeat	CGCGCGCGCG	1e-08	-20.55	0	501	0.0511	1447.5	0.0389
AGL25(MADS)/colamp-AGL25-DAP-Seq(GSE60143)/Homer	TTTCCATWTWTGGAA	1e-08	-20.26	0	379	0.0386	1049.1	0.0282
ERF7(AP2EREBP)/col-ERF7-DAP-Seq(GSE60143)/Homer	ATGRCGGCGG	1e-08	-20.05	0	2008	0.2047	6756.5	0.1814
Klf9(Zf)/GBM-Klf9-ChIP-Seq(GSE62211)/Homer	GCCACRCCCACY	1e-08	-20.02	0	113	0.0115	233.9	0.0063
Zac1(Zf)/Neuro2A-Plagl1-ChIP-Seq(GSE75942)/Homer	HAWGRGGCCM	1e-08	-19.86	0	1794	0.1829	5987.8	0.1608
KLF10(Zf)/HEK293-KLF10.GFP-ChIP-Seq(GSE58341)/Homer	GGGGGTGTGTCC	1e-08	-19.84	0	345	0.0352	944	0.0253
ABR1(AP2EREBP)/colamp-ABR1-DAP-Seq(GSE60143)/Homer	AAATGGCGGCGG	1e-08	-19.79	0	1813	0.1848	6057.3	0.1626
PRDM1(Zf)/Hela-PRDM1-ChIP-Seq(GSE31477)/Homer	ACTTTCACTTTC	1e-08	-19.22	0	1826	0.1861	6117.2	0.1642
ERF8(AP2EREBP)/colamp-ERF8-DAP-Seq(GSE60143)/Homer	CGCCGYCATW	1e-08	-19.18	0	1941	0.1979	6534.7	0.1754
LEP(AP2EREBP)/col-LEP-DAP-Seq(GSE60143)/Homer	CDCCGCCGTC	1e-08	-19.16	0	486	0.0495	1413.3	0.0379
Unknown3/Arabidopsis-Promoters/Homer	AYTAAACCGG	1e-08	-19.08	0	1626	0.1657	5400.7	0.145
AT2G28810(C2C2dof)/colamp-AT2G28810-DAP-Seq(GSE60143)/Homer	VAAAAAGTWA	1e-08	-18.91	0	7096	0.7233	25965.6	0.6971
HOXD13(Homeobox)/Chicken-Hoxd13-ChIP-Seq(GSE38910)/Homer	NCYAATAAAA	1e-08	-18.9	0	4978	0.5074	17829.1	0.4787
Ascl2(bHLH)/ESC-Ascl2-ChIP-Seq(GSE97712)/Homer	SSRGCAGCTGCH	1e-08	-18.87	0	582	0.0593	1739.4	0.0467
TF3A(C2H2)/col-TF3A-DAP-Seq(GSE60143)/Homer	NNDDGAGGAGGWNNN	1e-08	-18.58	0	2455	0.2503	8422.4	0.2261
Egr1(Zf)/K562-Egr1-ChIP-Seq(GSE32465)/Homer	TGCGTGGGYG	1e-07	-18.03	0	310	0.0316	847.2	0.0227
SHN3(AP2EREBP)/col-SHN3-DAP-Seq(GSE60143)/Homer	CCGCCGCC	1e-07	-17.76	0	294	0.03	798.1	0.0214
AT1G44830(AP2EREBP)/col-AT1G44830-DAP-Seq(GSE60143)/Homer	NCCACCGACA	1e-07	-17.64	0	649	0.0662	1984.4	0.0533
CRF4(AP2EREBP)/colamp-CRF4-DAP-Seq(GSE60143)/Homer	CGCCGCCA	1e-07	-17.55	0	819	0.0835	2572.6	0.0691
AGL13(MADS)/col-AGL13-DAP-Seq(GSE60143)/Homer	TWCCAWWTWTGGWAA	1e-07	-17.37	0	305	0.0311	837.5	0.0225
RORa(NR)/Liver-Rora-ChIP-Seq(GSE101115)/Homer	AAWCTAGGTCARDNN	1e-07	-17.16	0	352	0.0359	992.7	0.0267
VIP1(bZIP)/col-VIP1-DAP-Seq(GSE60143)/Homer	NTTGACAGCTGTCAN	1e-07	-17.01	0	183	0.0187	455.5	0.0122
RORgt(NR)/EL4-RORgt.Flag-ChIP-Seq(GSE56019)/Homer	AAYTAGGTCA	1e-07	-16.85	0	292	0.0298	800.6	0.0215
RORgt(NR)/EL4-RORgt.Flag-ChIP-Seq(GSE56019)/Homer	AAYTAGGTCA	1e-07	-16.85	0	292	0.0298	800.6	0.0215
bHLH130(bHLH)/col-bHLH130-DAP-Seq(GSE60143)/Homer	GCAACTTG	1e-07	-16.74	0	1429	0.1457	4745.2	0.1274
PU.1-IRF(ETS:IRF)/Bcell-PU.1-ChIP-Seq(GSE21512)/Homer	MGGAAGTGAAAC	1e-07	-16.7	0	3110	0.317	10892.1	0.2924
TGA5(bZIP)/col-TGA5-DAP-Seq(GSE60143)/Homer	NNGATGACGTCATCN	1e-07	-16.6	0	252	0.0257	674.1	0.0181
bZIP69(bZIP)/col-bZIP69-DAP-Seq(GSE60143)/Homer	GACAGCTGKCAW	1e-07	-16.56	0	97	0.0099	204.9	0.0055
AT1G01250(AP2EREBP)/col-AT1G01250-DAP-Seq(GSE60143)/Homer	YCACCGACAHTW	1e-07	-16.12	0	246	0.0251	659.2	0.0177
RORg(NR)/Liver-Rorc-ChIP-Seq(GSE101115)/Homer	WAABTAGGTCAV	1e-06	-16.03	0	276	0.0281	756.5	0.0203
LCL1(MYBrelated)/colamp-LCL1-DAP-Seq(GSE60143)/Homer	NAAAATATCTWHWWN	1e-06	-15.84	0	893	0.091	2860.1	0.0768
DREB26(AP2EREBP)/col-DREB26-DAP-Seq(GSE60143)/Homer	CCACCGACAH	1e-06	-15.74	0	480	0.0489	1435.7	0.0385
dof24(C2C2dof)/col-dof24-DAP-Seq(GSE60143)/Homer	TWMCTTTTTG	1e-06	-15.55	0	6150	0.6269	22415.5	0.6018
SeqBias: CA-repeat	CACACACACA	1e-06	-15.51	0	8972	0.9146	33503	0.8995
KLF6(Zf)/PDAC-KLF6-ChIP-Seq(GSE64557)/Homer	MKGGGYGTGGCC	1e-06	-15.32	0	384	0.0391	1118.2	0.03
Tbox:Smad(T-box,MAD)/ESCd5-Smad2_3-ChIP-Seq(GSE29422)/Homer	AGGTGHCAGACA	1e-06	-14.93	0	198	0.0202	517.9	0.0139
At5g65130(AP2EREBP)/colamp-At5g65130-DAP-Seq(GSE60143)/Homer	CCRCCGACAWTN	1e-06	-14.82	0	413	0.0421	1221.1	0.0328
TGA3(bZIP)/colamp-TGA3-DAP-Seq(GSE60143)/Homer	WTGATGACGTCATCW	1e-06	-14.8	0	127	0.0129	300.5	0.0081
HIF2a(bHLH)/785_O-HIF2a-ChIP-Seq(GSE34871)/Homer	GCACGTACCC	1e-06	-14.63	0	995	0.1014	3243.6	0.0871
HIF-1a(bHLH)/MCF7-HIF1a-ChIP-Seq(GSE28352)/Homer	TACGTGCV	1e-06	-14.47	0	707	0.0721	2234.7	0.06
REF6(Zf)/Arabidopsis-REF6-ChIP-Seq(GSE106942)/Homer	TVCTCTGTTT	1e-06	-14.39	0	1508	0.1537	5085.1	0.1365
FEA4(bZIP)/Corn-FEA4-ChIP-Seq(GSE61954)/Homer	TGACGTCACS	1e-06	-14.06	0	1972	0.201	6780.6	0.182
SPL5(SBP)/colamp-SPL5-DAP-Seq(GSE60143)/Homer	NNHGTACGGHNN	1e-06	-14.02	0	1932	0.1969	6635.4	0.1781
AGL16(MADS)/col-AGL16-DAP-Seq(GSE60143)/Homer	TWCCHWATWDGGAAA	1e-05	-13.77	0	409	0.0417	1221.2	0.0328
Maz(Zf)/HepG2-Maz-ChIP-Seq(GSE31477)/Homer	GGGGGGGG	1e-05	-13.68	0	279	0.0284	789.6	0.0212
ARF2(ARF)/col-ARF2-DAP-Seq(GSE60143)/Homer	TTGTCGGMWN	1e-05	-13.49	0	4259	0.4341	15300.6	0.4108
At4g38000(C2C2dof)/col-At4g38000-DAP-Seq(GSE60143)/Homer	WWWTWACTTTTT	1e-05	-13.29	0	6015	0.6131	21980.4	0.5901
MYB3R4(MYB)/col-MYB3R4-DAP-Seq(GSE60143)/Homer	AWWTAACCGTTR	1e-05	-13.23	0	1386	0.1413	4674.5	0.1255
HuR(?)/HEK293-HuR-CLIP-Seq(GSE87887)/Homer	BTTTGGTTTG	1e-05	-13.06	0	9458	0.9641	35562.1	0.9547
ERF1(AP2EREBP)/colamp-ERF1-DAP-Seq(GSE60143)/Homer	GGCGGCTR	1e-05	-13.02	0	560	0.0571	1748.6	0.0469
RAV1(RAV)/colamp-RAV1-DAP-Seq(GSE60143)/Homer	TWWTTTCTGTTG	1e-05	-12.97	0	3885	0.396	13913.4	0.3735
ATHB7(Homeobox)/col-ATHB7-DAP-Seq(GSE60143)/Homer	AATGATTG	1e-05	-12.94	0	3809	0.3883	13629.3	0.3659
SpiB(ETS)/OCILY3-SPIB-ChIP-Seq(GSE56857)/Homer	AAAGRGGAAGTG	1e-05	-12.88	0	508	0.0518	1571.2	0.0422
ANAC047(NAC)/colamp-ANAC047-DAP-Seq(GSE60143)/Homer	WACACGTAACTT	1e-05	-12.78	0	2692	0.2744	9470.9	0.2543
AT3G12130(C3H)/colamp-AT3G12130-DAP-Seq(GSE60143)/Homer	TMACTTTTTV	1e-05	-12.77	0	7182	0.7321	26500.6	0.7115
Cdx2(Homeobox)/mES-Cdx2-ChIP-Seq(GSE14586)/Homer	GYMATAAAAH	1e-05	-12.55	0	3571	0.364	12752.9	0.3424
WRKY42(WRKY)/colamp-WRKY42-DAP-Seq(GSE60143)/Homer	NAAAGTCAACGN	1e-05	-12.3	0	1034	0.1054	3432.9	0.0922
ANAC094(NAC)/col-ANAC094-DAP-Seq(GSE60143)/Homer	DVCGTRNNNNNYACG	1e-05	-12.16	0	886	0.0903	2908.9	0.0781
ATHB5(HB)/colamp-ATHB5-DAP-Seq(GSE60143)/Homer	AATGATTG	1e-05	-11.96	0	5066	0.5164	18413.5	0.4943
AGL6(MADS)/col-AGL6-DAP-Seq(GSE60143)/Homer	TTWCCWWAWWDGGWA	1e-05	-11.91	0	716	0.073	2312.2	0.0621
AT5G23930(mTERF)/col-AT5G23930-DAP-Seq(GSE60143)/Homer	GGCGGCTG	1e-05	-11.9	0	1223	0.1247	4120.7	0.1106
Mef2a(MADS)/HL1-Mef2a.biotin-ChIP-Seq(GSE21529)/Homer	CYAAAAATAG	1e-05	-11.73	0	1649	0.1681	5669.4	0.1522
NLP7(RWPRK)/col-NLP7-DAP-Seq(GSE60143)/Homer	TGRCCYTTCR	1e-05	-11.7	0	3100	0.316	11025.5	0.296
WRKY65(WRKY)/colamp-WRKY65-DAP-Seq(GSE60143)/Homer	AWWWAGTCAACG	1e-05	-11.65	0	1942	0.198	6743.9	0.1811
ERF2(AP2EREBP)/colamp-ERF2-DAP-Seq(GSE60143)/Homer	GGCGGCTG	1e-05	-11.57	0	572	0.0583	1814.3	0.0487
TATA-Box(TBP)/Promoter/Homer	CCTTTTAWAGSC	0.0001	-11.44	0	3690	0.3761	13241.9	0.3555
TGA1(bZIP)/colamp-TGA1-DAP-Seq(GSE60143)/Homer	TGACGTCAKC	0.0001	-11.32	0	970	0.0989	3226	0.0866
OBP4(C2C2dof)/col-OBP4-DAP-Seq(GSE60143)/Homer	WTTHACTTTTTB	0.0001	-11.31	0	6163	0.6282	22626.4	0.6074
WRKY21(WRKY)/colamp-WRKY21-DAP-Seq(GSE60143)/Homer	DCGTTGACTTTT	0.0001	-11.31	0	579	0.059	1843.9	0.0495
RBPJ:Ebox(?,bHLH)/Panc1-Rbpj1-ChIP-Seq(GSE47459)/Homer	GGGRAARRGRMCAGMTG	0.0001	-11.28	0	252	0.0257	726.2	0.0195
AT1G24250(Orphan)/col-AT1G24250-DAP-Seq(GSE60143)/Homer	KTDGTTGGTDGTTGG	0.0001	-11.28	0	1290	0.1315	4378.7	0.1176
WRKY8(WRKY)/colamp-WRKY8-DAP-Seq(GSE60143)/Homer	CGTTGACTTT	0.0001	-11.28	0	618	0.063	1980.4	0.0532
AtGRF6(GRF)/col-AtGRF6-DAP-Seq(GSE60143)/Homer	NTGTCAGADNNNNNN	0.0001	-11	0.0001	1466	0.1494	5024.9	0.1349
LOB(LOBAS2)/col-LOB-DAP-Seq(GSE60143)/Homer	CGCCGKAWWTTHCGS	0.0001	-10.87	0.0001	534	0.0544	1694.5	0.0455
WRKY47(WRKY)/colamp-WRKY47-DAP-Seq(GSE60143)/Homer	WAAGTCAACGBT	0.0001	-10.84	0.0001	861	0.0878	2848.5	0.0765
At1g77640(AP2EREBP)/col-At1g77640-DAP-Seq(GSE60143)/Homer	TGTCGGTGGA	0.0001	-10.79	0.0001	441	0.045	1373.3	0.0369
ZNF41(Zf)/HEK293-ZNF41.GFP-ChIP-Seq(GSE58341)/Homer	CCTCATGGTGYCYTWYTCCCTTGTG	0.0001	-10.74	0.0001	60	0.0061	127.3	0.0034
AT2G28920(ND)/col-AT2G28920-DAP-Seq(GSE60143)/Homer	WAGATATTTWTW	0.0001	-10.71	0.0001	1651	0.1683	5707.3	0.1532
At1g76110(ARID)/colamp-At1g76110-DAP-Seq(GSE60143)/Homer	ATTTAATG	0.0001	-10.62	0.0001	3576	0.3645	12847.6	0.3449
Atf2(bZIP)/3T3L1-Atf2-ChIP-Seq(GSE56872)/Homer	NRRTGACGTCAT	0.0001	-10.6	0.0001	551	0.0562	1758.1	0.0472
CELF2(RRM)/JSL1-CELF2-CLIP-Seq(GSE71264)/Homer	RGTGTCAG	0.0001	-10.44	0.0001	309	0.0315	927.4	0.0249
bZIP:IRF(bZIP,IRF)/Th17-BatF-ChIP-Seq(GSE39756)/Homer	NAGTTTCABTHTGACTNW	0.0001	-10.44	0.0001	1762	0.1796	6122.6	0.1644
Tbet(T-box)/CD8-Tbet-ChIP-Seq(GSE33802)/Homer	AGGTGTGAAM	0.0001	-10.41	0.0001	2557	0.2607	9055.3	0.2431
SPL3(SBP)/colamp-SPL3-DAP-Seq(GSE60143)/Homer	WDTTGTACGGAH	0.0001	-10.37	0.0001	232	0.0236	670.8	0.018
M1BP(Zf)/S2R+-M1BP-ChIP-Seq(GSE49842)/Homer	CAGTGTGACCGT	0.0001	-10.33	0.0001	240	0.0245	697.3	0.0187
Meis1(Homeobox)/MastCells-Meis1-ChIP-Seq(GSE48085)/Homer	VGCTGWCAVB	0.0001	-10.21	0.0001	1657	0.1689	5745.3	0.1542
AT3G51470(DBP)/col-AT3G51470-DAP-Seq(GSE60143)/Homer	TTWHGGTGCACC	0.0001	-10.17	0.0001	2832	0.2887	10086.8	0.2708
HINFP(Zf)/K562-HINFP.eGFP-ChIP-Seq(Encode)/Homer	TWVGGTCCGC	0.0001	-10.17	0.0001	320	0.0326	968.1	0.026
ATHB24(ZFHD)/colamp-ATHB24-DAP-Seq(GSE60143)/Homer	TAATTAAS	0.0001	-10.16	0.0001	4061	0.414	14689.7	0.3944
At4g01280(MYBrelated)/colamp-At4g01280-DAP-Seq(GSE60143)/Homer	AAATATCT	0.0001	-9.682	0.0002	3022	0.3081	10814.5	0.2903
At2g33710(AP2EREBP)/colamp-At2g33710-DAP-Seq(GSE60143)/Homer	WTKGCGGCKR	0.0001	-9.649	0.0002	2614	0.2665	9296.8	0.2496
WRKY43(WRKY)/colamp-WRKY43-DAP-Seq(GSE60143)/Homer	NCGTTGACTTTT	0.0001	-9.506	0.0002	1481	0.151	5125	0.1376
Egr2(Zf)/Thymocytes-Egr2-ChIP-Seq(GSE34254)/Homer	NGCGTGGGCGGR	0.0001	-9.239	0.0003	63	0.0064	143.8	0.0039
bHLH122(bHLH)/col100-bHLH122-DAP-Seq(GSE60143)/Homer	NDDCAASTTGHHNWW	0.001	-9.078	0.0003	1598	0.1629	5566.3	0.1494
EPR1(MYBrelated)/colamp-EPR1-DAP-Seq(GSE60143)/Homer	AAATATCT	0.001	-8.848	0.0004	2052	0.2092	7245.5	0.1945
LHY1(MYBrelated)/col-LHY1-DAP-Seq(GSE60143)/Homer	AAATATCT	0.001	-8.848	0.0004	2052	0.2092	7245.5	0.1945
Mef2d(MADS)/Retina-Mef2d-ChIP-Seq(GSE61391)/Homer	GCTATTTTTAGC	0.001	-8.775	0.0005	892	0.0909	3009.3	0.0808
Reverb(NR),DR2/RAW-Reverba.biotin-ChIP-Seq(GSE45914)/Homer	GTRGGTCASTGGGTCA	0.001	-8.665	0.0005	67	0.0068	158.4	0.0043
RRTF1(AP2EREBP)/colamp-RRTF1-DAP-Seq(GSE60143)/Homer	CCGCCGCHATTT	0.001	-8.63	0.0005	695	0.0708	2308	0.062
Pitx1:Ebox(Homeobox,bHLH)/Hindlimb-Pitx1-ChIP-Seq(GSE41591)/Homer	YTAATTRAWWCCAGATGT	0.001	-8.591	0.0006	681	0.0694	2258.3	0.0606
AGL15(MADS)/col-AGL15-DAP-Seq(GSE60143)/Homer	TTTCCHWATWDGGAA	0.001	-8.578	0.0006	714	0.0728	2376.9	0.0638
Pbx3(Homeobox)/GM12878-PBX3-ChIP-Seq(GSE32465)/Homer	SCTGTCAMTCAN	0.001	-8.507	0.0006	214	0.0218	632.8	0.017
AT3G57600(AP2EREBP)/col-AT3G57600-DAP-Seq(GSE60143)/Homer	GGCGGTGG	0.001	-8.455	0.0006	761	0.0776	2547.9	0.0684
Sp2(Zf)/HEK293-Sp2.eGFP-ChIP-Seq(Encode)/Homer	YGGCCCCGCCCC	0.001	-8.215	0.0008	570	0.0581	1872.2	0.0503
MYNN(Zf)/HEK293-MYNN.eGFP-ChIP-Seq(Encode)/Homer	TTCAAAWTAAAAGTC	0.001	-8.212	0.0008	1140	0.1162	3922.2	0.1053
Twist(bHLH)/HMLE-TWIST1-ChIP-Seq(Chang_et_al)/Homer	VCAKCTGGNNNCCAGMTGBN	0.001	-8.033	0.0009	73	0.0074	180.8	0.0049
TGA10(bZIP)/colamp-TGA10-DAP-Seq(GSE60143)/Homer	ATGACGTC	0.001	-8.008	0.001	1584	0.1615	5552.5	0.1491
RAP211(AP2EREBP)/colamp-RAP211-DAP-Seq(GSE60143)/Homer	RGCCGGCYWW	0.001	-8.001	0.001	1817	0.1852	6410.1	0.1721
JunD(bZIP)/K562-JunD-ChIP-Seq/Homer	ATGACGTCATCN	0.001	-7.935	0.001	160	0.0163	459.2	0.0123
MYB88(MYB)/col-MYB88-DAP-Seq(GSE60143)/Homer	HNACGCTCCT	0.001	-7.933	0.001	1516	0.1545	5305.3	0.1424
Klf4(Zf)/mES-Klf4-ChIP-Seq(GSE11431)/Homer	GCCACACCCA	0.001	-7.871	0.0011	140	0.0143	394.6	0.0106
caudal(Homeobox)/Drosophila-Embryos-ChIP-Chip(modEncode)/Homer	GGYCATAAAW	0.001	-7.776	0.0012	3708	0.378	13472.8	0.3617
ANAC042(NAC)/col-ANAC042-DAP-Seq(GSE60143)/Homer	CGTNDHNDHNACGKY	0.001	-7.713	0.0013	1164	0.1187	4025.2	0.1081
GRF9(GRF)/colamp-GRF9-DAP-Seq(GSE60143)/Homer	NWCTGACANNNNNNN	0.001	-7.575	0.0015	1016	0.1036	3491.6	0.0937
WRKY22(WRKY)/colamp-WRKY22-DAP-Seq(GSE60143)/Homer	WWAAAGTCAACK	0.001	-7.556	0.0015	2108	0.2149	7504.5	0.2015
Dlx3(Homeobox)/Kerainocytes-Dlx3-ChIP-Seq(GSE89884)/Homer	NDGTAATTAC	0.001	-7.527	0.0015	3842	0.3916	13989.7	0.3756
CDF3(C2C2dof)/colamp-CDF3-DAP-Seq(GSE60143)/Homer	AAAAGTRM	0.001	-7.513	0.0015	5823	0.5936	21503	0.5773
ATHB34(ZFHD)/colamp-ATHB34-DAP-Seq(GSE60143)/Homer	TRATTARS	0.001	-7.459	0.0016	4288	0.4371	15675.2	0.4208
SeqBias: GA-repeat	GAGAGAGAGA	0.001	-7.32	0.0019	9046	0.9221	34010.1	0.9131
FoxD3(forkhead)/ZebrafishEmbryo-Foxd3.biotin-ChIP-seq(GSE106676)/Homer	TGTTTAYTTAGC	0.001	-7.076	0.0024	3590	0.366	13064.3	0.3507
CDM1(C3H)/colamp-CDM1-DAP-Seq(GSE60143)/Homer	CCGAWAWTWTCGGAN	0.001	-7.071	0.0024	600	0.0612	2005.4	0.0538
Knotted(Homeobox)/Corn-KN1-ChIP-Seq(GSE39161)/Homer	GAYGNGACRGGN	0.01	-6.894	0.0028	2615	0.2666	9420.6	0.2529
Unknown1(NR/Ini-like)/Drosophila-Promoters/Homer	MYGGTCACACTG	0.01	-6.808	0.0031	203	0.0207	618	0.0166
ZKSCAN1(Zf)/HepG2-ZKSCAN1-ChIP-Seq(Encode)/Homer	GCACAYAGTAGGKCY	0.01	-6.635	0.0036	16	0.0016	26	0.0007
Hoxb4(Homeobox)/ES-Hoxb4-ChIP-Seq(GSE34014)/Homer	TGATTRATGGCY	0.01	-6.632	0.0036	793	0.0808	2711.6	0.0728
Hand2(bHLH)/Mesoderm-Hand2-ChIP-Seq(GSE61475)/Homer	TGACANARRCCAGRC	0.01	-6.629	0.0036	420	0.0428	1375.7	0.0369
Jun-AP1(bZIP)/K562-cJun-ChIP-Seq(GSE31477)/Homer	GATGASTCATCN	0.01	-6.529	0.004	267	0.0272	841.6	0.0226
IRF3(IRF)/BMDM-Irf3-ChIP-Seq(GSE67343)/Homer	AGTTTCAKTTTC	0.01	-6.512	0.0041	1563	0.1593	5532.1	0.1485
KLF3(Zf)/MEF-Klf3-ChIP-Seq(GSE44748)/Homer	NRGCCCCRCCCHBNN	0.01	-6.475	0.0042	110	0.0112	310.8	0.0083
WT1(Zf)/Kidney-WT1-ChIP-Seq(GSE90016)/Homer	MCTCCCMCRCAB	0.01	-6.447	0.0043	344	0.0351	1111.5	0.0298
AT5G63260(C3H)/col-AT5G63260-DAP-Seq(GSE60143)/Homer	RAAAAAGTRA	0.01	-6.361	0.0047	7310	0.7452	27269	0.7321
HAT1(Homeobox)/col-HAT1-DAP-Seq(GSE60143)/Homer	SCAATCATTGNN	0.01	-6.356	0.0047	1002	0.1021	3479.6	0.0934
AT1G69570(C2C2dof)/col-AT1G69570-DAP-Seq(GSE60143)/Homer	WAAAAGTGHH	0.01	-6.286	0.005	4504	0.4591	16557.1	0.4445
DAG2(C2C2dof)/col-DAG2-DAP-Seq(GSE60143)/Homer	WWTTHACTTTTT	0.01	-6.206	0.0054	6790	0.6922	25276.3	0.6786
WRKY27(WRKY)/colamp-WRKY27-DAP-Seq(GSE60143)/Homer	NHGTTGACYTWD	0.01	-6.157	0.0057	3063	0.3122	11134.8	0.2989
IRF8(IRF)/BMDM-IRF8-ChIP-Seq(GSE77884)/Homer	GRAASTGAAAST	0.01	-6.115	0.0059	1137	0.1159	3981.3	0.1069
AT3G58630(Trihelix)/col-AT3G58630-DAP-Seq(GSE60143)/Homer	TCTCCGGCGA	0.01	-6.106	0.006	734	0.0748	2513.9	0.0675
Atf7(bZIP)/3T3L1-Atf7-ChIP-Seq(GSE56872)/Homer	NGRTGACGTCAY	0.01	-6.074	0.0061	874	0.0891	3022.6	0.0811
MYB56(MYB)/colamp-MYB56-DAP-Seq(GSE60143)/Homer	HTAACGRMHY	0.01	-5.996	0.0066	3352	0.3417	12228.9	0.3283
SUT1?/SacCer-Promoters/Homer	CCCCGCGC	0.01	-5.994	0.0066	3855	0.393	14122.4	0.3791
AT5G66940(C2C2dof)/col-AT5G66940-DAP-Seq(GSE60143)/Homer	NNHACTTTWT	0.01	-5.961	0.0068	6870	0.7003	25597.6	0.6872
WRKY14(WRKY)/colamp-WRKY14-DAP-Seq(GSE60143)/Homer	NCGTTGACTTTN	0.01	-5.888	0.0073	1895	0.1932	6788.5	0.1822
Nur77(NR)/K562-NR4A1-ChIP-Seq(GSE31363)/Homer	TGACCTTTNCNT	0.01	-5.821	0.0078	491	0.0501	1646.2	0.0442
Srebp2(bHLH)/HepG2-Srebp2-ChIP-Seq(GSE31477)/Homer	CGGTCACSCCAC	0.01	-5.795	0.008	113	0.0115	327.2	0.0088
ZNF675(Zf)/HEK293-ZNF675.GFP-ChIP-Seq(GSE58341)/Homer	ARGAGGMCAAAATGW	0.01	-5.759	0.0082	314	0.032	1019.7	0.0274
bHLH80(bHLH)/col-bHLH80-DAP-Seq(GSE60143)/Homer	NNNNDCAASTTGHNN	0.01	-5.74	0.0084	1555	0.1585	5535.4	0.1486
WRKY20(WRKY)/col-WRKY20-DAP-Seq(GSE60143)/Homer	CKTTGACYWD	0.01	-5.719	0.0085	2417	0.2464	8740.3	0.2346
WRKY3(WRKY)/col-WRKY3-DAP-Seq(GSE60143)/Homer	NCKTTGACYDDN	0.01	-5.713	0.0086	2167	0.2209	7808.7	0.2096
RKD2(RWPRK)/colamp-RKD2-DAP-Seq(GSE60143)/Homer	GACKTTTCRDCTTCC	0.01	-5.64	0.0092	2217	0.226	7998.6	0.2147
WRKY46(WRKY)/colamp-WRKY46-DAP-Seq(GSE60143)/Homer	AAAGTCAACGSN	0.01	-5.562	0.0099	289	0.0295	935.5	0.0251
HOXB13(Homeobox)/ProstateTumor-HOXB13-ChIP-Seq(GSE56288)/Homer	TTTTATKRGG	0.01	-5.542	0.0101	4227	0.4309	15554.1	0.4176
TGA9(bZIP)/colamp-TGA9-DAP-Seq(GSE60143)/Homer	VTGACGTC	0.01	-5.337	0.0124	2851	0.2906	10385.1	0.2788
At3g09600(MYBrelated)/colamp-At3g09600-DAP-Seq(GSE60143)/Homer	AAAATATCTT	0.01	-5.309	0.0127	2774	0.2828	10098.9	0.2711
SPL11(SBP)/col100-SPL11-DAP-Seq(GSE60143)/Homer	YTGTACTTBH	0.01	-5.252	0.0134	1609	0.164	5757.8	0.1546
AS2(LOBAS2)/col-AS2-DAP-Seq(GSE60143)/Homer	CCGDAAWWHMCGSCG	0.01	-5.139	0.0149	185	0.0189	580.6	0.0156
WRKY30(WRKY)/colamp-WRKY30-DAP-Seq(GSE60143)/Homer	CGTTGACTTN	0.01	-5.137	0.0149	839	0.0855	2926.1	0.0786
Bach1(bZIP)/K562-Bach1-ChIP-Seq(GSE31477)/Homer	AWWNTGCTGAGTCAT	0.01	-5.074	0.0159	73	0.0074	203.9	0.0055
Adof1(C2C2dof)/col-Adof1-DAP-Seq(GSE60143)/Homer	NRWAAAGYDV	0.01	-5.019	0.0167	7976	0.813	29914.6	0.8031
Srebp1a(bHLH)/HepG2-Srebp1a-ChIP-Seq(GSE31477)/Homer	RTCACSCCAY	0.01	-4.938	0.0181	244	0.0249	789.5	0.0212
WRKY11(WRKY)/col-WRKY11-DAP-Seq(GSE60143)/Homer	SCGTTGACTTTN	0.01	-4.829	0.0201	509	0.0519	1737.4	0.0466
Phox2a(Homeobox)/Neuron-Phox2a-ChIP-Seq(GSE31456)/Homer	YTAATYNRATTA	0.01	-4.696	0.0229	2955	0.3012	10814.7	0.2903
NFAT:AP1(RHD,bZIP)/Jurkat-NFATC1-ChIP-Seq(Jolma_et_al.)/Homer	SARTGGAAAAWRTGAGTCAB	0.01	-4.688	0.023	421	0.0429	1424.9	0.0383
WRKY40(WRKY)/colamp-WRKY40-DAP-Seq(GSE60143)/Homer	AHWAGTCAAC	0.01	-4.632	0.0243	1881	0.1917	6799.9	0.1826
Tcfcp2l1(CP2)/mES-Tcfcp2l1-ChIP-Seq(GSE11431)/Homer	NRAACCRGTTYRAACCRGYT	0.01	-4.629	0.0243	180	0.0183	571.1	0.0153
ATAF1(NAC)/col-ATAF1-DAP-Seq(GSE60143)/Homer	YACGTMAY	0.01	-4.613	0.0247	5545	0.5652	20618	0.5535
EKLF(Zf)/Erythrocyte-Klf1-ChIP-Seq(GSE20478)/Homer	NWGGGTGTGGCY	0.1	-4.566	0.0258	80	0.0082	231.8	0.0062
NF1:FOXA1(CTF,Forkhead)/LNCAP-FOXA1-ChIP-Seq(GSE27824)/Homer	WNTGTTTRYTTTGGCA	0.1	-4.498	0.0275	204	0.0208	657.2	0.0176
IRF:BATF(IRF:bZIP)/pDC-Irf8-ChIP-Seq(GSE66899)/Homer	CTTTCANTATGACTV	0.1	-4.43	0.0294	524	0.0534	1803.5	0.0484
GLI3(Zf)/Limb-GLI3-ChIP-Chip(GSE11077)/Homer	CGTGGGTGGTCC	0.1	-4.303	0.0333	71	0.0072	204.1	0.0055
Myf5(bHLH)/GM-Myf5-ChIP-Seq(GSE24852)/Homer	BAACAGCTGT	0.1	-4.28	0.034	364	0.0371	1230.7	0.033
ZNF264(Zf)/HEK293-ZNF264.GFP-ChIP-Seq(GSE58341)/Homer	RGGGCACTAACY	0.1	-4.275	0.0341	779	0.0794	2738.2	0.0735
ABF1/SacCer-Promoters/Homer	CGTRNAAARTGA	0.1	-4.267	0.0343	886	0.0903	3131.7	0.0841
WRKY31(WRKY)/colamp-WRKY31-DAP-Seq(GSE60143)/Homer	NCGTTGACTWWK	0.1	-4.222	0.0357	2298	0.2343	8380.9	0.225
WRKY26(WRKY)/colamp-WRKY26-DAP-Seq(GSE60143)/Homer	CGTTGACTWDKN	0.1	-4.219	0.0358	1694	0.1727	6125.2	0.1644
Lhx2(Homeobox)/HFSC-Lhx2-ChIP-Seq(GSE48068)/Homer	TAATTAGN	0.1	-4.168	0.0375	4718	0.4809	17507.6	0.47
IRF1(IRF)/PBMC-IRF1-ChIP-Seq(GSE43036)/Homer	GAAAGTGAAAGT	0.1	-4.077	0.041	560	0.0571	1945.5	0.0522
AT3G10113(MYBrelated)/col-AT3G10113-DAP-Seq(GSE60143)/Homer	WNAAATATCWWN	0.1	-4.071	0.0411	2406	0.2453	8794.2	0.2361
AT5G22990(C2H2)/col-AT5G22990-DAP-Seq(GSE60143)/Homer	WCGAHDTCGWHN	0.1	-4.065	0.0413	1232	0.1256	4417.4	0.1186
Gli2(Zf)/GM2-Gli2-ChIP-Chip(GSE112702)/Homer	YSTGGGTGGTCT	0.1	-4.037	0.0424	111	0.0113	342.6	0.0092
AT3G42860(zfGRF)/col-AT3G42860-DAP-Seq(GSE60143)/Homer	CGTTGACTTN	0.1	-3.968	0.0453	791	0.0806	2794.7	0.075
EIL4(EIL)/Tomato-EIL4-ChIP-Seq(GSE116581)/Homer	GATTCAWTGAAT	0.1	-3.824	0.0522	385	0.0392	1318.7	0.0354
ZNF467(Zf)/HEK293-ZNF467.GFP-ChIP-Seq(GSE58341)/Homer	TGGGGAAGGGCM	0.1	-3.822	0.0522	337	0.0344	1145.2	0.0307
LRF(Zf)/Erythroblasts-ZBTB7A-ChIP-Seq(GSE74977)/Homer	AAGACCCYYN	0.1	-3.819	0.0522	565	0.0576	1972.2	0.0529
WRKY6(WRKY)/colamp-WRKY6-DAP-Seq(GSE60143)/Homer	NCGTTGACTWWD	0.1	-3.804	0.0528	2725	0.2778	10009.9	0.2687
MafA(bZIP)/Islet-MafA-ChIP-Seq(GSE30298)/Homer	TGCTGACTCA	0.1	-3.704	0.0583	653	0.0666	2298	0.0617
E-box/Drosophila-Promoters/Homer	AACAGCTGTTHN	0.1	-3.7	0.0584	188	0.0192	616.3	0.0165
ATHB15(HB)/col-ATHB15-DAP-Seq(GSE60143)/Homer	GYAATSATTA	0.1	-3.664	0.0604	1663	0.1695	6041.4	0.1622
WRKY33(WRKY)/col-WRKY33-DAP-Seq(GSE60143)/Homer	CGTTGACYAW	0.1	-3.614	0.0633	2517	0.2566	9241.1	0.2481
NF-E2(bZIP)/K562-NFE2-ChIP-Seq(GSE31477)/Homer	GATGACTCAGCA	0.1	-3.571	0.066	53	0.0054	152.1	0.0041
HAT2(Homeobox)/colamp-HAT2-DAP-Seq(GSE60143)/Homer	CYAATSATTR	0.1	-3.491	0.0712	4030	0.4108	14954.5	0.4015
ZNF768(Zf)/Rajj-ZNF768-ChIP-Seq(GSE111879)/Homer	RHHCAGAGAGGB	0.1	-3.427	0.0758	24	0.0024	60.2	0.0016
E2A(bHLH)/proBcell-E2A-ChIP-Seq(GSE21978)/Homer	DNRCAGCTGY	0.1	-3.419	0.0762	587	0.0598	2067.7	0.0555
GATA19(C2C2gata)/colamp-GATA19-DAP-Seq(GSE60143)/Homer	ATCSGATCVG	0.1	-3.39	0.0783	401	0.0409	1389.1	0.0373
WRKY24(WRKY)/colamp-WRKY24-DAP-Seq(GSE60143)/Homer	CGTTGACTWW	0.1	-3.38	0.0789	2607	0.2657	9596.2	0.2576
NF1(CTF)/LNCAP-NF1-ChIP-Seq(Unpublished)/Homer	CYTGGCABNSTGCCAR	0.1	-3.341	0.0818	152	0.0155	496.9	0.0133
DDF2(AP2EREBP)/col-DDF2-DAP-Seq(GSE60143)/Homer	GATGTCGRCR	0.1	-3.329	0.0827	161	0.0164	528.6	0.0142
ERE(NR),IR3/MCF7-ERa-ChIP-Seq(Unpublished)/Homer	VAGGTCACNSTGACC	0.1	-3.304	0.0845	143	0.0146	465.7	0.0125
Arnt:Ahr(bHLH)/MCF7-Arnt-ChIP-Seq(Lo_et_al.)/Homer	TBGCACGCAA	0.1	-3.283	0.0861	1252	0.1276	4532.6	0.1217
EAR2(NR)/K562-NR2F6-ChIP-Seq(Encode)/Homer	NRBCARRGGTCA	0.1	-3.204	0.093	1200	0.1223	4344	0.1166
REB1/SacCer-Promoters/Homer	KCCGGGTAAYRR	0.1	-3.203	0.093	341	0.0348	1177.8	0.0316
MyoD(bHLH)/Myotube-MyoD-ChIP-Seq(GSE21614)/Homer	RRCAGCTGYTSY	0.1	-3.176	0.0952	354	0.0361	1225.7	0.0329
Atf1(bZIP)/K562-ATF1-ChIP-Seq(GSE31477)/Homer	GATGACGTCA	0.1	-3.169	0.0957	1696	0.1729	6195.7	0.1663
WRKY17(WRKY)/colamp-WRKY17-DAP-Seq(GSE60143)/Homer	GCGTTGACTTTT	0.1	-3.11	0.1012	83	0.0085	259.8	0.007
Hoxd13(Homeobox)/ChickenMSG-Hoxd13.Flag-ChIP-Seq(GSE86088)/Homer	NCYAATAAAA	0.1	-3.08	0.1041	5884	0.5998	22028.2	0.5914
Pknox1(Homeobox)/ES-Prep1-ChIP-Seq(GSE63282)/Homer	SCTGTCAVTCAV	0.1	-3.067	0.1052	220	0.0224	744.7	0.02
bZIP52(bZIP)/colamp-bZIP52-DAP-Seq(GSE60143)/Homer	NDNHCAGCTGTCANN	0.1	-3	0.1122	1693	0.1726	6195.5	0.1663
Tbx21(T-box)/GM12878-TBX21-ChIP-Seq(Encode)/Homer	AGGTGTGAAA	0.1	-2.994	0.1127	2187	0.2229	8047.6	0.2161
ATHB23(ZFHD)/col-ATHB23-DAP-Seq(GSE60143)/Homer	HTAATTARNN	0.1	-2.967	0.1155	4659	0.4749	17382.5	0.4667
WRKY15(WRKY)/col-WRKY15-DAP-Seq(GSE60143)/Homer	VGTTGACTWW	0.1	-2.906	0.1225	3044	0.3103	11279.9	0.3028
LBD2(LOBAS2)/colamp-LBD2-DAP-Seq(GSE60143)/Homer	TCCGAWTTTTTCGGN	0.1	-2.875	0.126	1434	0.1462	5235.2	0.1405
NAM(NAC)/col-NAM-DAP-Seq(GSE60143)/Homer	RGTTRCGTRW	0.1	-2.824	0.1323	3385	0.3451	12573.9	0.3376
Zfp57(Zf)/H1-ZFP57.HA-ChIP-Seq(GSE115387)/Homer	NANTGCSGCA	0.1	-2.808	0.1341	450	0.0459	1588.8	0.0427
MyoG(bHLH)/C2C12-MyoG-ChIP-Seq(GSE36024)/Homer	AACAGCTG	0.1	-2.794	0.1357	522	0.0532	1853.1	0.0498
WRKY45(WRKY)/col-WRKY45-DAP-Seq(GSE60143)/Homer	HNNNKTTGACTWWNH	0.1	-2.707	0.1477	1938	0.1976	7135	0.1916
Pax7(Paired,Homeobox)/Myoblast-Pax7-ChIP-Seq(GSE25064)/Homer	TAATCAATTA	0.1	-2.639	0.1579	993	0.1012	3605.4	0.0968
TOD6?/SacCer-Promoters/Homer	GCGATGAGMT	0.1	-2.616	0.1611	332	0.0338	1163.6	0.0312
PRDM10(Zf)/HEK293-PRDM10.eGFP-ChIP-Seq(Encode)/Homer	TGGTACATTCCA	0.1	-2.545	0.1725	655	0.0668	2355.4	0.0632
FOXA1:AR(Forkhead,NR)/LNCAP-AR-ChIP-Seq(GSE27824)/Homer	AGTAAACAAAAAAGAACAND	0.1	-2.469	0.1857	353	0.036	1245.8	0.0334
Replumless(BLH)/Arabidopsis-RPL.GFP-ChIP-Seq(GSE78727)/Homer	HGTCWHATCA	0.1	-2.466	0.1859	3010	0.3068	11190.1	0.3004
Pax7(Paired,Homeobox),longest/Myoblast-Pax7-ChIP-Seq(GSE25064)/Homer	NTAATTDGCYAATTANNWWD	0.1	-2.434	0.1915	330	0.0336	1162	0.0312
NRF(NRF)/Promoter/Homer	STGCGCATGCGC	0.1	-2.429	0.192	41	0.0042	124.1	0.0033
MYB3R1(MYB)/col-MYB3R1-DAP-Seq(GSE60143)/Homer	WWDTDACCGTTR	0.1	-2.344	0.2087	2218	0.2261	8216	0.2206
E2FA(E2FDP)/colamp-E2FA-DAP-Seq(GSE60143)/Homer	WWTGGCGCCAWWWNN	0.1	-2.343	0.2087	933	0.0951	3399.6	0.0913
Nrf2(bZIP)/Lymphoblast-Nrf2-ChIP-Seq(GSE37589)/Homer	HTGCTGAGTCAT	0.1	-2.33	0.2108	43	0.0044	132.1	0.0035
PRDM14(Zf)/H1-PRDM14-ChIP-Seq(GSE22767)/Homer	RGGTCTCTAACY	1	-2.297	0.2173	465	0.0474	1664.6	0.0447
WRKY71(WRKY)/col-WRKY71-DAP-Seq(GSE60143)/Homer	CKTTGACYWW	1	-2.246	0.2282	2315	0.236	8590.3	0.2306
c-Jun-CRE(bZIP)/K562-cJun-ChIP-Seq(GSE31477)/Homer	ATGACGTCATCY	1	-2.222	0.2332	453	0.0462	1623.6	0.0436
Unknown3/Drosophila-Promoters/Homer	ACVAKCTGGCAGCGC	1	-2.197	0.2385	46	0.0047	144.8	0.0039
LXH9(Homeobox)/Hct116-LXH9.V5-ChIP-Seq(GSE116822)/Homer	NGCTAATTAG	1	-2.148	0.25	5352	0.5456	20096.9	0.5395
DUX(Homeobox)/C2C12-Dux-ChIP-Seq(GSE87279)/Homer	BCWGATTCAATCAAN	1	-2.113	0.2584	21	0.0021	60.2	0.0016
PPARE(NR),DR1/3T3L1-Pparg-ChIP-Seq(GSE13511)/Homer	TGACCTTTGCCCCA	1	-2.081	0.2661	830	0.0846	3031.4	0.0814
WRKY7(WRKY)/colamp-WRKY7-DAP-Seq(GSE60143)/Homer	AAAAGTCAACGSHWD	1	-2.074	0.2674	31	0.0032	94.4	0.0025
Fosl2(bZIP)/3T3L1-Fosl2-ChIP-Seq(GSE56872)/Homer	NATGASTCABNN	1	-2.074	0.2674	432	0.044	1552.7	0.0417
WRKY75(WRKY)/col-WRKY75-DAP-Seq(GSE60143)/Homer	CGTTGACTWW	1	-2.053	0.2721	2889	0.2945	10774.7	0.2893
Hoxc9(Homeobox)/Ainv15-Hoxc9-ChIP-Seq(GSE21812)/Homer	GGCCATAAATCA	1	-2.042	0.2743	2333	0.2378	8677.3	0.233
ZNF7(Zf)/HepG2-ZNF7.Flag-ChIP-Seq(Encode)/Homer	CTGCCWVCTTTTRTA	1	-2.027	0.278	1237	0.1261	4557.6	0.1224
WRKY25(WRKY)/colamp-WRKY25-DAP-Seq(GSE60143)/Homer	NNNNHRGTCAAMNNN	1	-2.016	0.2805	3416	0.3482	12771	0.3429
Duxbl(Homeobox)/NIH3T3-Duxbl.HA-ChIP-Seq(GSE119782)/Homer	TAAYCYAATCAA	1	-1.981	0.29	498	0.0508	1801.5	0.0484
LBD23(LOBAS2)/colamp-LBD23-DAP-Seq(GSE60143)/Homer	GCGNAWWWTNCGCYW	1	-1.964	0.2943	1414	0.1441	5226.4	0.1403
PBX1(Homeobox)/MCF7-PBX1-ChIP-Seq(GSE28007)/Homer	GSCTGTCACTCA	1	-1.963	0.2943	28	0.0029	85.1	0.0023
FOXM1(Forkhead)/MCF7-FOXM1-ChIP-Seq(GSE72977)/Homer	TRTTTACTTW	1	-1.94	0.2999	3585	0.3654	13418.7	0.3603
WRKY29(WRKY)/colamp-WRKY29-DAP-Seq(GSE60143)/Homer	MGTTGACTTT	1	-1.89	0.3149	3132	0.3193	11710.2	0.3144
WRKY28(WRKY)/col-WRKY28-DAP-Seq(GSE60143)/Homer	BGTTGACTWH	1	-1.885	0.3157	3807	0.3881	14265.1	0.383
ZBTB33(Zf)/GM12878-ZBTB33-ChIP-Seq(GSE32465)/Homer	GGVTCTCGCGAGAAC	1	-1.825	0.3345	53	0.0054	174	0.0047
At5g62940(C2C2dof)/col-At5g62940-DAP-Seq(GSE60143)/Homer	WHWHHACTTTTT	1	-1.819	0.3358	8647	0.8814	32709.6	0.8782
Smad4(MAD)/ESC-SMAD4-ChIP-Seq(GSE29422)/Homer	VBSYGTCTGG	1	-1.818	0.3358	1198	0.1221	4427.1	0.1189
Sp1(Zf)/Promoter/Homer	GGCCCCGCCCCC	1	-1.814	0.3363	19	0.0019	56.6	0.0015
T1ISRE(IRF)/ThioMac-Ifnb-Expression/Homer	ACTTTCGTTTCT	1	-1.799	0.3407	70	0.0071	235.6	0.0063
Phox2b(Homeobox)/CLBGA-PHOX2B-ChIP-Seq(GSE90683)/Homer	TTAATTNAATTA	1	-1.797	0.3407	1819	0.1854	6764.1	0.1816
ISRE(IRF)/ThioMac-LPS-Expression(GSE23622)/Homer	AGTTTCASTTTC	1	-1.793	0.3413	246	0.0251	877.5	0.0236
PAX6(Paired,Homeobox)/Forebrain-Pax6-ChIP-Seq(GSE66961)/Homer	NGTGTTCAVTSAAGCGKAAA	1	-1.767	0.3496	143	0.0146	500.3	0.0134
AT2G20400(G2like)/colamp-AT2G20400-DAP-Seq(GSE60143)/Homer	DNVGAATATTCBNHN	1	-1.757	0.3521	522	0.0532	1902.4	0.0511
PRDM15(Zf)/ESC-Prdm15-ChIP-Seq(GSE73694)/Homer	YCCDNTCCAGGTTTT	1	-1.589	0.4159	1649	0.1681	6144.8	0.165
SeqBias: GCW-triplet	GCWGCWGCWGCW	1	-1.58	0.4185	9810	1	37242.2	0.9998
ETS:RUNX(ETS,Runt)/Jurkat-RUNX1-ChIP-Seq(GSE17954)/Homer	RCAGGATGTGGT	1	-1.58	0.4185	61	0.0062	207.9	0.0056
THRa(NR)/C17.2-THRa-ChIP-Seq(GSE38347)/Homer	GGTCANYTGAGGWCA	1	-1.55	0.4296	195	0.0199	698.7	0.0188
Gfi1b(Zf)/HPC7-Gfi1b-ChIP-Seq(GSE22178)/Homer	MAATCACTGC	1	-1.493	0.454	1046	0.1066	3883.6	0.1043
Lhx1(Homeobox)/EmbryoCarcinoma-Lhx1-ChIP-Seq(GSE70957)/Homer	NNYTAATTAR	1	-1.484	0.4573	5133	0.5232	19347	0.5194
ZNF16(Zf)/HEK293-ZNF16.GFP-ChIP-Seq(GSE58341)/Homer	MACCTTCYATGGCTCCCTAKTGCCY	1	-1.463	0.4659	1	0.0001	0.5	0
HOXA9(Homeobox)/HSC-Hoxa9-ChIP-Seq(GSE33509)/Homer	GGCCATAAATCA	1	-1.456	0.4682	2728	0.2781	10234.7	0.2748
AT3G52440(C2C2dof)/colamp-AT3G52440-DAP-Seq(GSE60143)/Homer	DTHACTTTTT	1	-1.439	0.4751	7240	0.738	27369.3	0.7348
Bach2(bZIP)/OCILy7-Bach2-ChIP-Seq(GSE44420)/Homer	TGCTGAGTCA	1	-1.421	0.483	188	0.0192	677.6	0.0182
DUX4(Homeobox)/Myoblasts-DUX4.V5-ChIP-Seq(GSE75791)/Homer	NWTAAYCYAATCAWN	1	-1.412	0.4864	364	0.0371	1332	0.0358
Unknown4/Drosophila-Promoters/Homer	AAAAATACCRMA	1	-1.388	0.4972	662	0.0675	2449.3	0.0658
ZNF416(Zf)/HEK293-ZNF416.GFP-ChIP-Seq(GSE58341)/Homer	WDNCTGGGCA	1	-1.379	0.5006	447	0.0456	1644.4	0.0441
Tcf12(bHLH)/GM12878-Tcf12-ChIP-Seq(GSE32465)/Homer	VCAGCTGYTG	1	-1.378	0.5006	386	0.0393	1416.1	0.038
MafK(bZIP)/C2C12-MafK-ChIP-Seq(GSE36030)/Homer	GCTGASTCAGCA	1	-1.376	0.5006	147	0.015	527.1	0.0142
dHNF4(NR)/Fly-HNF4-ChIP-Seq(GSE73675)/Homer	GGTCCAAAGTCCAMT	1	-1.371	0.5018	82	0.0084	288.9	0.0078
Hoxd10(Homeobox)/ChickenMSG-Hoxd10.Flag-ChIP-Seq(GSE86088)/Homer	GGCMATGAAA	1	-1.366	0.503	3724	0.3796	14018.3	0.3763
NAP(NAC)/col-NAP-DAP-Seq(GSE60143)/Homer	ARGTTACGTRTN	1	-1.347	0.512	3381	0.3446	12721.9	0.3415
CDX4(Homeobox)/ZebrafishEmbryos-Cdx4.Myc-ChIP-Seq(GSE48254)/Homer	NGYCATAAAWCH	1	-1.344	0.5124	3984	0.4061	15007.5	0.4029
GEI-11(Myb?)/cElegans-L4-GEI11-ChIP-Seq(modEncode)/Homer	CCGACAYYTYACGGG	1	-1.331	0.518	48	0.0049	165.4	0.0044
RVE1(MYBrelated)/col-RVE1-DAP-Seq(GSE60143)/Homer	AAATATCT	1	-1.328	0.5188	2816	0.2871	10584.8	0.2842
TATA-box/Drosophila-Promoters/Homer	CTATAAAAGCSV	1	-1.289	0.5381	348	0.0355	1279.8	0.0344
Smad2(MAD)/ES-SMAD2-ChIP-Seq(GSE29422)/Homer	CTGTCTGG	1	-1.273	0.5455	1241	0.1265	4638.8	0.1245
AT1G10720(BSD)/col-AT1G10720-DAP-Seq(GSE60143)/Homer	TTCTAGAAKCTTCTA	1	-1.273	0.5455	43	0.0044	148.9	0.004
Tbx6(T-box)/ESC-Tbx6-ChIP-Seq(GSE93524)/Homer	DAGGTGTBAA	1	-1.245	0.5591	1727	0.176	6476.4	0.1739
THRb(NR)/HepG2-THRb.Flag-ChIP-Seq(Encode)/Homer	GGTCACCTGAGGTCA	1	-1.209	0.5783	205	0.0209	749.2	0.0201
TR4(NR),DR1/Hela-TR4-ChIP-Seq(GSE24685)/Homer	GAGGTCAAAGGTCA	1	-1.203	0.5806	71	0.0072	252.4	0.0068
Zfp281(Zf)/ES-Zfp281-ChIP-Seq(GSE81042)/Homer	CCCCTCCCCCAC	1	-1.176	0.5952	19	0.0019	63.9	0.0017
Prop1(Homeobox)/GHFT1-PROP1.biotin-ChIP-Seq(GSE77302)/Homer	NTAATBNAATTA	1	-1.151	0.6092	4071	0.415	15367.7	0.4126
HNF4a(NR),DR1/HepG2-HNF4a-ChIP-Seq(GSE25021)/Homer	CARRGKBCAAAGTYCA	1	-1.13	0.6211	569	0.058	2119.3	0.0569
PAX5(Paired,Homeobox),condensed/GM12878-PAX5-ChIP-Seq(GSE32465)/Homer	GTCACGCTCSCTGM	1	-1.087	0.6473	75	0.0076	270.2	0.0073
AT3G10030(Trihelix)/colamp-AT3G10030-DAP-Seq(GSE60143)/Homer	GCCGTTAA	1	-1.086	0.6473	2543	0.2592	9585.4	0.2573
RAR:RXR(NR),DR5/ES-RAR-ChIP-Seq(GSE56893)/Homer	RGGTCADNNAGAGGTCAV	1	-1.086	0.6473	10	0.001	32.9	0.0009
GFY(?)/Promoter/Homer	ACTACAATTCCC	1	-1.056	0.6635	61	0.0062	219.7	0.0059
ERF15(AP2EREBP)/colamp-ERF15-DAP-Seq(GSE60143)/Homer	WDHAGCMGCCAT	1	-1.044	0.6703	1711	0.1744	6441.6	0.1729
RXR(NR),DR1/3T3L1-RXR-ChIP-Seq(GSE13511)/Homer	TAGGGCAAAGGTCA	1	-1.008	0.6937	817	0.0833	3065.8	0.0823
ZNF317(Zf)/HEK293-ZNF317.GFP-ChIP-Seq(GSE58341)/Homer	GTCWGCTGTYYCTCT	1	-0.9723	0.7174	88	0.009	323	0.0087
HLH-1(bHLH)/cElegans-Embryo-HLH1-ChIP-Seq(modEncode)/Homer	RACAGCTGTTBH	1	-0.9662	0.7204	1046	0.1066	3935.6	0.1057
ZNF382(Zf)/HEK293-ZNF382.GFP-ChIP-Seq(GSE58341)/Homer	GNCTGTASTRNTGBCTCHTT	1	-0.9377	0.7399	37	0.0038	133.5	0.0036
E2F4(E2F)/K562-E2F4-ChIP-Seq(GSE31477)/Homer	GGCGGGAAAH	1	-0.9361	0.7399	764	0.0779	2872	0.0771
MYB44(MYB)/colamp-MYB44-DAP-Seq(GSE60143)/Homer	CVGTTWWKTCNGTTA	1	-0.8977	0.7671	590	0.0601	2218.8	0.0596
MafF(bZIP)/HepG2-MafF-ChIP-Seq(GSE31477)/Homer	HWWGTCAGCAWWTTT	1	-0.8743	0.7838	794	0.0809	2993	0.0804
LIN-15B(Zf)/cElegans-L3-LIN15B-ChIP-Seq(modEncode)/Homer	CARTGGAGCGCRYTTGCATT	1	-0.8615	0.7924	3	0.0003	9.3	0.0003
OCT:OCT(POU,Homeobox)/NPC-Brn1-ChIP-Seq(GSE35496)/Homer	ATGAATATTCATGAG	1	-0.8241	0.8211	28	0.0029	102.3	0.0027
EIN3(EIL)/col-EIN3-DAP-Seq(GSE60143)/Homer	ARATTCAATGWATYT	1	-0.8072	0.8335	603	0.0615	2276.8	0.0611
SPL15(SBP)/colamp-SPL15-DAP-Seq(GSE60143)/Homer	WDWMMGTACADW	1	-0.803	0.8355	3681	0.3752	13951.3	0.3745
WUS1(Homeobox)/colamp-WUS1-DAP-Seq(GSE60143)/Homer	CAWTCATTCA	1	-0.7772	0.8557	1424	0.1452	5392.4	0.1448
OCT:OCT(POU,Homeobox,IR1)/NPC-Brn2-ChIP-Seq(GSE35496)/Homer	ATGAATWATTCATGA	1	-0.7766	0.8557	76	0.0077	284	0.0076
EFL-1(E2F)/cElegans-L1-EFL1-ChIP-Seq(modEncode)/Homer	TGCAARYGCGCTCYA	1	-0.7458	0.8797	14	0.0014	51.9	0.0014
OBP1(C2C2dof)/col-OBP1-DAP-Seq(GSE60143)/Homer	NHHACTTTWT	1	-0.7433	0.8802	8250	0.841	31314	0.8407
NFE2L2(bZIP)/HepG2-NFE2L2-ChIP-Seq(Encode)/Homer	AWWWTGCTGAGTCAT	1	-0.7017	0.916	66	0.0067	249.7	0.0067
CTCF(Zf)/CD4+-CTCF-ChIP-Seq(Barski_et_al.)/Homer	AYAGTGCCMYCTRGTGGCCA	1	-0.6663	0.9471	16	0.0016	60.3	0.0016
HSFA6A(HSF)/col-HSFA6A-DAP-Seq(GSE60143)/Homer	RGAAGNTTCTAGAAN	1	-0.6652	0.9471	63	0.0064	239.8	0.0064
Tcf21(bHLH)/ArterySmoothMuscle-Tcf21-ChIP-Seq(GSE61369)/Homer	NAACAGCTGG	1	-0.6456	0.9634	501	0.0511	1906	0.0512
Atoh1(bHLH)/Cerebellum-Atoh1-ChIP-Seq(GSE22111)/Homer	VNRVCAGCTGGY	1	-0.6411	0.966	705	0.0719	2682.9	0.072
CES-1(Homeobox)/cElegans-L1-CES1-ChIP-Seq(modEncode)/Homer	AAATTSAATTTN	1	-0.6375	0.9677	3947	0.4023	14998.1	0.4027
AtHB32(ZFHD)/col200-AtHB32-DAP-Seq(GSE60143)/Homer	CGAATTAT	1	-0.6281	0.975	5431	0.5536	20635.5	0.554
SeqBias: A/T bias	WWWWWWWWWW	1	-0.6105	0.9905	9803	0.9993	37220.4	0.9993
GATA6(C2C2gata)/col200-GATA6-DAP-Seq(GSE60143)/Homer	TAGATCTARAHH	1	-0.6051	0.994	364	0.0371	1389.9	0.0373
ZNF669(Zf)/HEK293-ZNF669.GFP-ChIP-Seq(GSE58341)/Homer	GARTGGTCATCGCCC	1	-0.5887	1	81	0.0083	311.9	0.0084
AT2G31460(REMB3)/col-AT2G31460-DAP-Seq(GSE60143)/Homer	WNWARWDGAAATGAT	1	-0.5693	1	1028	0.1048	3921.4	0.1053
HOXA2(Homeobox)/mES-Hoxa2-ChIP-Seq(Donaldson_et_al.)/Homer	GYCATCMATCAT	1	-0.5603	1	484	0.0493	1851.2	0.0497
PLT3(AP2EREBP)/col-PLT3-DAP-Seq(GSE60143)/Homer	GCACGNWTHYCGAGG	1	-0.5601	1	113	0.0115	435	0.0117
Tlx?(NR)/NPC-H3K4me1-ChIP-Seq(GSE16256)/Homer	CTGGCAGSCTGCCA	1	-0.5551	1	97	0.0099	374.4	0.0101
DEL2(E2FDP)/col-DEL2-DAP-Seq(GSE60143)/Homer	WTTTCSCGCC	1	-0.5328	1	662	0.0675	2533.9	0.068
AT1G23810(Orphan)/col-AT1G23810-DAP-Seq(GSE60143)/Homer	TTCTAGAAGSTTCTA	1	-0.5289	1	81	0.0083	314.7	0.0084
ATHB6(Homeobox)/col-ATHB6-DAP-Seq(GSE60143)/Homer	AATGATTG	1	-0.5279	1	5767	0.5879	21937.9	0.589
ZSCAN22(Zf)/HEK293-ZSCAN22.GFP-ChIP-Seq(GSE58341)/Homer	SMCAGTCWGAKGGAGGAGGC	1	-0.5239	1	26	0.0027	102.4	0.0027
Ronin(THAP)/ES-Thap11-ChIP-Seq(GSE51522)/Homer	RACTACAACTCCCAGVAKGC	1	-0.5034	1	6	0.0006	24.9	0.0007
ZNF189(Zf)/HEK293-ZNF189.GFP-ChIP-Seq(GSE58341)/Homer	TGGAACAGMA	1	-0.5019	1	1037	0.1057	3967.9	0.1065
NFkB-p50,p52(RHD)/Monocyte-p50-ChIP-Chip(Schreiber_et_al.)/Homer	GGGGGAATCCCC	1	-0.4947	1	25	0.0025	99.9	0.0027
Zfp809(Zf)/ES-Zfp809-ChIP-Seq(GSE70799)/Homer	GGGGCTYGKCTGGGA	1	-0.493	1	35	0.0036	138.5	0.0037
JunB(bZIP)/DendriticCells-Junb-ChIP-Seq(GSE36099)/Homer	RATGASTCAT	1	-0.4838	1	1007	0.1027	3856.5	0.1035
SF1(NR)/H295R-Nr5a1-ChIP-Seq(GSE44220)/Homer	CAAGGHCANV	1	-0.4634	1	360	0.0367	1389.6	0.0373
Tbx20(T-box)/Heart-Tbx20-ChIP-Seq(GSE29636)/Homer	GGTGYTGACAGS	1	-0.4488	1	213	0.0217	827.7	0.0222
NRF1(NRF)/MCF7-NRF1-ChIP-Seq(Unpublished)/Homer	CTGCGCATGCGC	1	-0.4481	1	8	0.0008	33.5	0.0009
ZNF528(Zf)/HEK293-ZNF528.GFP-ChIP-Seq(GSE58341)/Homer	AGAAATGACTTCCCT	1	-0.4414	1	6	0.0006	25.4	0.0007
NeuroD1(bHLH)/Islet-NeuroD1-ChIP-Seq(GSE30298)/Homer	GCCATCTGTT	1	-0.4324	1	488	0.0497	1883.8	0.0506
Isl1(Homeobox)/Neuron-Isl1-ChIP-Seq(GSE31456)/Homer	CTAATKGV	1	-0.43	1	5277	0.5379	20107.1	0.5398
Etv2(ETS)/ES-ER71-ChIP-Seq(GSE59402)/Homer	NNAYTTCCTGHN	1	-0.4123	1	908	0.0926	3492.8	0.0938
MYB113(MYB)/col-MYB113-DAP-Seq(GSE60143)/Homer	HNDAWTCMGTTAYWN	1	-0.3965	1	3390	0.3456	12950.3	0.3477
HNF1b(Homeobox)/PDAC-HNF1B-ChIP-Seq(GSE64557)/Homer	GTTAATNATTAA	1	-0.3957	1	1021	0.1041	3927.6	0.1054
ZNF519(Zf)/HEK293-ZNF519.GFP-ChIP-Seq(GSE58341)/Homer	GAGSCCGAGC	1	-0.3858	1	54	0.0055	217.9	0.0059
ZBTB18(Zf)/HEK293-ZBTB18.GFP-ChIP-Seq(GSE58341)/Homer	AACATCTGGA	1	-0.382	1	305	0.0311	1188.4	0.0319
REST-NRSF(Zf)/Jurkat-NRSF-ChIP-Seq/Homer	GGMGCTGTCCATGGTGCTGA	1	-0.3782	1	2	0.0002	9.8	0.0003
ANAC079(NAC)/colamp-ANAC079-DAP-Seq(GSE60143)/Homer	TACACGCAACCT	1	-0.3774	1	1433	0.1461	5504.2	0.1478
Slug(Zf)/Mesoderm-Snai2-ChIP-Seq(GSE61475)/Homer	SNGCACCTGCHS	1	-0.3642	1	196	0.02	770.1	0.0207
LBD13(LOBAS2)/colamp-LBD13-DAP-Seq(GSE60143)/Homer	KCCGTNWTTTBCGGC	1	-0.3613	1	1385	0.1412	5325.4	0.143
PAX3:FKHR-fusion(Paired,Homeobox)/Rh4-PAX3:FKHR-ChIP-Seq(GSE19063)/Homer	ACCRTGACTAATTNN	1	-0.359	1	677	0.069	2619.7	0.0703
PPARa(NR),DR1/Liver-Ppara-ChIP-Seq(GSE47954)/Homer	VNAGGKCAAAGGTCA	1	-0.3571	1	1137	0.1159	4379.8	0.1176
AT4G00250(GeBP)/col-AT4G00250-DAP-Seq(GSE60143)/Homer	WDTGGATAAKRT	1	-0.3535	1	2437	0.2484	9338.1	0.2507
IRF2(IRF)/Erythroblas-IRF2-ChIP-Seq(GSE36985)/Homer	GAAASYGAAASY	1	-0.3471	1	395	0.0403	1539.2	0.0413
HSFB4(HSF)/col-HSFB4-DAP-Seq(GSE60143)/Homer	TTCTAGAAGCTTCTA	1	-0.3431	1	74	0.0075	298.9	0.008
GT1(Trihelix)/col-GT1-DAP-Seq(GSE60143)/Homer	TTAACCATGGTTAAD	1	-0.3322	1	71	0.0072	287.7	0.0077
PU.1:IRF8(ETS:IRF)/pDC-Irf8-ChIP-Seq(GSE66899)/Homer	GGAAGTGAAAST	1	-0.3303	1	419	0.0427	1634.7	0.0439
NF1-halfsite(CTF)/LNCaP-NF1-ChIP-Seq(Unpublished)/Homer	YTGCCAAG	1	-0.3249	1	1567	0.1597	6030.7	0.1619
ZNF322(Zf)/HEK293-ZNF322.GFP-ChIP-Seq(GSE58341)/Homer	GAGCCTGGTACTGWGCCTGR	1	-0.3232	1	47	0.0048	193.2	0.0052
YY1(Zf)/Promoter/Homer	CAAGATGGCGGC	1	-0.323	1	66	0.0067	268.2	0.0072
At1g75490(AP2EREBP)/colamp-At1g75490-DAP-Seq(GSE60143)/Homer	CACCGMCT	1	-0.3162	1	3913	0.3989	14968.6	0.4019
WRKY55(WRKY)/col-WRKY55-DAP-Seq(GSE60143)/Homer	NCGTTGACTT	1	-0.3096	1	2987	0.3045	11448.6	0.3074
ZNF143|STAF(Zf)/CUTLL-ZNF143-ChIP-Seq(GSE29600)/Homer	ATTTCCCAGVAKSCY	1	-0.2889	1	127	0.0129	510	0.0137
OBP3(C2C2dof)/col-OBP3-DAP-Seq(GSE60143)/Homer	NYWACTTTTT	1	-0.2679	1	8001	0.8156	30482.4	0.8184
NFAT(RHD)/Jurkat-NFATC1-ChIP-Seq(Jolma_et_al.)/Homer	ATTTTCCATT	1	-0.2663	1	2442	0.2489	9389.4	0.2521
SeqBias: C/A-bias	MMMMMMMMMM	1	-0.2634	1	9810	1	37248.3	1
SeqBias: G/A bias	RRRRRRRRRR	1	-0.2634	1	9810	1	37248.3	1
Ik-1	NHTTGGGAATRCC	1	-0.2634	1	9810	1	37248.3	1
BORIS(Zf)/K562-CTCFL-ChIP-Seq(GSE32465)/Homer	CNNBRGCGCCCCCTGSTGGC	1	-0.2598	1	14	0.0014	64	0.0017
GATA1(C2C2gata)/colamp-GATA1-DAP-Seq(GSE60143)/Homer	DDWWYYAGATCTRRW	1	-0.2534	1	1123	0.1145	4354.4	0.1169
p53(p53)/Saos-p53-ChIP-Seq(GSE15780)/Homer	RRCATGYCYRGRCATGYYYN	1	-0.2511	1	100	0.0102	408.8	0.011
p53(p53)/Saos-p53-ChIP-Seq/Homer	RRCATGYCYRGRCATGYYYN	1	-0.2511	1	100	0.0102	408.8	0.011
Rbpj1(?)/Panc1-Rbpj1-ChIP-Seq(GSE47459)/Homer	HTTTCCCASG	1	-0.2486	1	1849	0.1885	7133.3	0.1915
GATA11(C2C2gata)/col-GATA11-DAP-Seq(GSE60143)/Homer	DDHYYAGATCTR	1	-0.2448	1	1025	0.1045	3981.8	0.1069
GFY-Staf(?,Zf)/Promoter/Homer	RACTACAATTCCCAGAAKGC	1	-0.2438	1	23	0.0023	101.6	0.0027
HIC1(Zf)/Treg-ZBTB29-ChIP-Seq(GSE99889)/Homer	TGCCAGCB	1	-0.2409	1	1177	0.12	4565.7	0.1226
At5g22890(C2H2)/col-At5g22890-DAP-Seq(GSE60143)/Homer	NSAGGTKWTATCTGD	1	-0.2344	1	49	0.005	207.4	0.0056
Brachyury(T-box)/Mesoendoderm-Brachyury-ChIP-exo(GSE54963)/Homer	ANTTMRCASBNNNGTGYKAAN	1	-0.2334	1	405	0.0413	1598.7	0.0429
p73(p53)/Trachea-p73-ChIP-Seq(PRJNA310161)/Homer	NRRRCAWGTCCDGRCATGYY	1	-0.2254	1	33	0.0034	143.7	0.0039
Brn2(POU,Homeobox)/NPC-Brn2-ChIP-Seq(GSE35496)/Homer	ATGAATATTC	1	-0.2243	1	389	0.0397	1538.5	0.0413
OCT4-SOX2-TCF-NANOG(POU,Homeobox,HMG)/mES-Oct4-ChIP-Seq(GSE11431)/Homer	ATTTGCATAACAATG	1	-0.2233	1	893	0.091	3482	0.0935
SPL1(SBP)/colamp-SPL1-DAP-Seq(GSE60143)/Homer	HYGTACDTWH	1	-0.2176	1	4396	0.4481	16850.7	0.4524
Pax7(Paired,Homeobox),long/Myoblast-Pax7-ChIP-Seq(GSE25064)/Homer	TAATCHGATTAC	1	-0.2044	1	219	0.0223	881.2	0.0237
E2F6(E2F)/Hela-E2F6-ChIP-Seq(GSE31477)/Homer	GGCGGGAARN	1	-0.2027	1	412	0.042	1632.1	0.0438
p63(p53)/Keratinocyte-p63-ChIP-Seq(GSE17611)/Homer	NNDRCATGYCYNRRCATGYH	1	-0.2011	1	295	0.0301	1178.9	0.0316
PHV(HB)/col-PHV-DAP-Seq(GSE60143)/Homer	RTAATSATTA	1	-0.1953	1	1967	0.2005	7607.5	0.2042
ATHB25(ZFHD)/colamp-ATHB25-DAP-Seq(GSE60143)/Homer	TAATTAVB	1	-0.1906	1	5295	0.5398	20279.3	0.5444
Ap4(bHLH)/AML-Tfap4-ChIP-Seq(GSE45738)/Homer	NAHCAGCTGD	1	-0.1898	1	677	0.069	2660.1	0.0714
At5g18450(AP2EREBP)/col-At5g18450-DAP-Seq(GSE60143)/Homer	CACCGCTT	1	-0.1796	1	1943	0.1981	7523.3	0.202
HSFB3(HSF)/colamp-HSFB3-DAP-Seq(GSE60143)/Homer	TTCTAGAAGMTTHTW	1	-0.1772	1	147	0.015	603.2	0.0162
Znf263(Zf)/K562-Znf263-ChIP-Seq(GSE31477)/Homer	CVGTSCTCCC	1	-0.1746	1	1208	0.1231	4709.3	0.1264
HSF21(HSF)/col-HSF21-DAP-Seq(GSE60143)/Homer	CTTCTAGAAGMTTYW	1	-0.1612	1	210	0.0214	854.1	0.0229
WRKY50(WRKY)/col-WRKY50-DAP-Seq(GSE60143)/Homer	NNTTGACTWNNGNNN	1	-0.1564	1	2872	0.2928	11085.8	0.2976
GFX(?)/Promoter/Homer	ATTCTCGCGAGA	1	-0.1534	1	13	0.0013	64.9	0.0017
Rfx2(HTH)/LoVo-RFX2-ChIP-Seq(GSE49402)/Homer	GTTGCCATGGCAACM	1	-0.1518	1	53	0.0054	231.1	0.0062
GATA3(Zf),DR4/iTreg-Gata3-ChIP-Seq(GSE20898)/Homer	AGATGKDGAGATAAG	1	-0.1491	1	358	0.0365	1436.7	0.0386
Pit1+1bp(Homeobox)/GCrat-Pit1-ChIP-Seq(GSE58009)/Homer	ATGCATAATTCA	1	-0.1408	1	1812	0.1847	7043.4	0.1891
ATHB33(ZFHD)/col-ATHB33-DAP-Seq(GSE60143)/Homer	NGTRATTAAK	1	-0.1362	1	5378	0.5482	20632	0.5539
HOXA1(Homeobox)/mES-Hoxa1-ChIP-Seq(SRP084292)/Homer	TGATKGATGR	1	-0.1357	1	1205	0.1228	4716.8	0.1266
Ascl1(bHLH)/NeuralTubes-Ascl1-ChIP-Seq(GSE55840)/Homer	NNVVCAGCTGBN	1	-0.1349	1	643	0.0655	2548.3	0.0684
COUP-TFII(NR)/Artia-Nr2f2-ChIP-Seq(GSE46497)/Homer	AGRGGTCA	1	-0.1342	1	1595	0.1626	6215.3	0.1669
Oct4:Sox17(POU,Homeobox,HMG)/F9-Sox17-ChIP-Seq(GSE44553)/Homer	CCATTGTATGCAAAT	1	-0.1257	1	506	0.0516	2020.5	0.0542
Hoxa11(Homeobox)/ChickenMSG-Hoxa11.Flag-ChIP-Seq(GSE86088)/Homer	TTTTATGGCM	1	-0.1257	1	7089	0.7226	27113.1	0.7279
BATF(bZIP)/Th17-BATF-ChIP-Seq(GSE39756)/Homer	DATGASTCAT	1	-0.125	1	1250	0.1274	4895.3	0.1314
RAR:RXR(NR),DR5/ES-RAR-ChIP-Seq(GSE56893)/Homer	AGGTCAAGGTCA	1	-0.1218	1	83	0.0085	357.2	0.0096
GATA12(C2C2gata)/col-GATA12-DAP-Seq(GSE60143)/Homer	YAGATCTRAW	1	-0.1206	1	1460	0.1488	5705.2	0.1532
Fra2(bZIP)/Striatum-Fra2-ChIP-Seq(GSE43429)/Homer	GGATGACTCATC	1	-0.1197	1	833	0.0849	3291	0.0884
VDR(NR),DR3/GM10855-VDR+vitD-ChIP-Seq(GSE22484)/Homer	ARAGGTCANWGAGTTCANNN	1	-0.1195	1	148	0.0151	618.1	0.0166
E2F3(E2F)/MEF-E2F3-ChIP-Seq(GSE71376)/Homer	BTKGGCGGGAAA	1	-0.1166	1	493	0.0503	1973.6	0.053
SPL9(SBP)/colamp-SPL9-DAP-Seq(GSE60143)/Homer	BTGTACTT	1	-0.1153	1	4291	0.4374	16521.4	0.4435
AMYB(HTH)/Testes-AMYB-ChIP-Seq(GSE44588)/Homer	TGGCAGTTGG	1	-0.11	1	2994	0.3052	11585.4	0.311
RARg(NR)/ES-RARg-ChIP-Seq(GSE30538)/Homer	AGGTCAAGGTCA	1	-0.1054	1	12	0.0012	63.7	0.0017
FXR(NR),IR1/Liver-FXR-ChIP-Seq(Chong_et_al.)/Homer	AGGTCANTGACCTB	1	-0.1046	1	251	0.0256	1030.9	0.0277
ETS:E-box(ETS,bHLH)/HPC7-Scl-ChIP-Seq(GSE22178)/Homer	AGGAARCAGCTG	1	-0.1041	1	67	0.0068	295.7	0.0079
EBNA1(EBV-virus)/Raji-EBNA1-ChIP-Seq(GSE30709)/Homer	GGYAGCAYDTGCTDCCCNNN	1	-0.1001	1	2	0.0002	15.7	0.0004
Pax8(Paired,Homeobox)/Thyroid-Pax8-ChIP-Seq(GSE26938)/Homer	GTCATGCHTGRCTGS	1	-0.09656	1	87	0.0089	378.9	0.0102
At5g29000(G2like)/col-At5g29000-DAP-Seq(GSE60143)/Homer	RGAATATTCYHH	1	-0.09601	1	909	0.0927	3597.6	0.0966
Esrrb(NR)/mES-Esrrb-ChIP-Seq(GSE11431)/Homer	KTGACCTTGA	1	-0.09533	1	680	0.0693	2710.5	0.0728
WRKY18(WRKY)/col-WRKY18-DAP-Seq(GSE60143)/Homer	NNNTTGACYWNNNNN	1	-0.08948	1	3955	0.4032	15268.9	0.4099
LXRE(NR),DR4/RAW-LXRb.biotin-ChIP-Seq(GSE21512)/Homer	RGGTTACTANAGGTCA	1	-0.08485	1	34	0.0035	161.2	0.0043
TCF4(bHLH)/SHSY5Y-TCF4-ChIP-Seq(GSE96915)/Homer	SMCATCTGKH	1	-0.08429	1	1285	0.131	5057.7	0.1358
MafB(bZIP)/BMM-Mafb-ChIP-Seq(GSE75722)/Homer	WNTGCTGASTCAGCANWTTY	1	-0.08154	1	414	0.0422	1680.5	0.0451
PU.1(ETS)/ThioMac-PU.1-ChIP-Seq(GSE21512)/Homer	AGAGGAAGTG	1	-0.08078	1	443	0.0452	1794.2	0.0482
AT1G04880(ARID)/colamp-AT1G04880-DAP-Seq(GSE60143)/Homer	AAACTATATADTATA	1	-0.08041	1	1223	0.1247	4821.9	0.1295
Fra1(bZIP)/BT549-Fra1-ChIP-Seq(GSE46166)/Homer	NNATGASTCATH	1	-0.07505	1	1125	0.1147	4447.8	0.1194
p53(p53)/mES-cMyc-ChIP-Seq(GSE11431)/Homer	ACATGCCCGGGCAT	1	-0.07449	1	1	0.0001	10.1	0.0003
Oct6(POU,Homeobox)/NPC-Pou3f1-ChIP-Seq(GSE35496)/Homer	WATGCAAATGAG	1	-0.07213	1	1343	0.1369	5291.3	0.1421
PRDM9(Zf)/Testis-DMC1-ChIP-Seq(GSE35498)/Homer	ADGGYAGYAGCATCT	1	-0.06953	1	391	0.0399	1596.6	0.0429
STAT1(Stat)/HelaS3-STAT1-ChIP-Seq(GSE12782)/Homer	NATTTCCNGGAAAT	1	-0.06786	1	653	0.0666	2622.1	0.0704
Smad3(MAD)/NPC-Smad3-ChIP-Seq(GSE36673)/Homer	TWGTCTGV	1	-0.06317	1	2893	0.2949	11250	0.302
AP-1(bZIP)/ThioMac-PU.1-ChIP-Seq(GSE21512)/Homer	VTGACTCATC	1	-0.06175	1	1337	0.1363	5278.1	0.1417
Elk4(ETS)/Hela-Elk4-ChIP-Seq(GSE31477)/Homer	NRYTTCCGGY	1	-0.05633	1	1379	0.1406	5446.5	0.1462
Atf3(bZIP)/GBM-ATF3-ChIP-Seq(GSE33912)/Homer	DATGASTCATHN	1	-0.0549	1	1223	0.1247	4845.6	0.1301
FOXA1(Forkhead)/MCF7-FOXA1-ChIP-Seq(GSE26831)/Homer	WAAGTAAACA	1	-0.05422	1	3656	0.3727	14175.8	0.3806
Bcl11a(Zf)/HSPC-BCL11A-ChIP-Seq(GSE104676)/Homer	TYTGACCASWRG	1	-0.04949	1	651	0.0664	2629.7	0.0706
GATA3(Zf),DR8/iTreg-Gata3-ChIP-Seq(GSE20898)/Homer	AGATSTNDNNDSAGATAASN	1	-0.04906	1	244	0.0249	1026.7	0.0276
NFkB-p65-Rel(RHD)/ThioMac-LPS-Expression(GSE23622)/Homer	GGAAATTCCC	1	-0.04839	1	47	0.0048	224.1	0.006
AARE(HLH)/mES-cMyc-ChIP-Seq/Homer	GATTGCATCA	1	-0.04767	1	293	0.0299	1222.2	0.0328
ZML2(C2C2gata)/col-ZML2-DAP-Seq(GSE60143)/Homer	CATCATCATC	1	-0.04439	1	795	0.081	3196.7	0.0858
Mouse_Recombination_Hotspot(Zf)/Testis-DMC1-ChIP-Seq(GSE24438)/Homer	ACTYKNATTCGTGNTACTTC	1	-0.04413	1	173	0.0176	744.6	0.02
PAX5(Paired,Homeobox)/GM12878-PAX5-ChIP-Seq(GSE32465)/Homer	GCAGCCAAGCRTGACH	1	-0.04125	1	236	0.0241	999.4	0.0268
CTCF-SatelliteElement(Zf?)/CD4+-CTCF-ChIP-Seq(Barski_et_al.)/Homer	TGCAGTTCCMVNWRTGGCCA	1	-0.04123	1	3	0.0003	25.1	0.0007
Sox2(HMG)/mES-Sox2-ChIP-Seq(GSE11431)/Homer	BCCATTGTTC	1	-0.03727	1	2484	0.2532	9725.1	0.2611
ZEB2(Zf)/SNU398-ZEB2-ChIP-Seq(GSE103048)/Homer	GNMCAGGTGTGC	1	-0.03661	1	442	0.0451	1821.2	0.0489
SeqBias: polyA-repeat	AAAAAAAAAA	1	-0.02959	1	9809	0.9999	37248.3	1
At1g74840(MYBrelated)/col100-At1g74840-DAP-Seq(GSE60143)/Homer	YHTTATCCAWWT	1	-0.02948	1	3302	0.3366	12874.5	0.3456
AT1G76870(Trihelix)/col-AT1G76870-DAP-Seq(GSE60143)/Homer	AAAACCRGWW	1	-0.02806	1	1563	0.1593	6200.9	0.1665
ARE(NR)/LNCAP-AR-ChIP-Seq(GSE27824)/Homer	RGRACASNSTGTYCYB	1	-0.0265	1	127	0.0129	568.5	0.0153
EBF(EBF)/proBcell-EBF-ChIP-Seq(GSE21978)/Homer	DGTCCCYRGGGA	1	-0.02607	1	52	0.0053	254.3	0.0068
Lhx3(Homeobox)/Neuron-Lhx3-ChIP-Seq(GSE31456)/Homer	ADBTAATTAR	1	-0.02548	1	6384	0.6508	24587.2	0.6601
EBF1(EBF)/Near-E2A-ChIP-Seq(GSE21512)/Homer	GTCCCCWGGGGA	1	-0.02536	1	228	0.0232	980.9	0.0263
Hoxa10(Homeobox)/ChickenMSG-Hoxa10.Flag-ChIP-Seq(GSE86088)/Homer	GGYAATGAAA	1	-0.02437	1	1916	0.1953	7571	0.2033
PLT1(AP2EREBP)/colamp-PLT1-DAP-Seq(GSE60143)/Homer	GCACGAWTYCCGAGG	1	-0.02405	1	136	0.0139	607	0.0163
FUS3(ABI3VP1)/col-FUS3-DAP-Seq(GSE60143)/Homer	DNNWTNTGCATGKNN	1	-0.02145	1	1570	0.16	6243.2	0.1676
Gata2(Zf)/K562-GATA2-ChIP-Seq(GSE18829)/Homer	BBCTTATCTS	1	-0.01909	1	2049	0.2089	8099.3	0.2174
DREF/Drosophila-Promoters/Homer	AVYTATCGATAD	1	-0.01733	1	156	0.0159	696.2	0.0187
GATA:SCL(Zf,bHLH)/Ter119-SCL-ChIP-Seq(GSE18720)/Homer	CRGCTGBNGNSNNSAGATAA	1	-0.01691	1	104	0.0106	481.8	0.0129
E2F(E2F)/Hela-CellCycle-Expression/Homer	TTSGCGCGAAAA	1	-0.01628	1	183	0.0187	808.4	0.0217
TRP2(MYBrelated)/colamp-TRP2-DAP-Seq(GSE60143)/Homer	TAAACCCT	1	-0.01463	1	873	0.089	3552.6	0.0954
ZNF136(Zf)/HEK293-ZNF136.GFP-ChIP-Seq(GSE58341)/Homer	YTKGATAHAGTATTCTWGGTNGGCA	1	-0.01418	1	255	0.026	1104.1	0.0296
BHLHA15(bHLH)/NIH3T3-BHLHB8.HA-ChIP-Seq(GSE119782)/Homer	NAMCAGCTGK	1	-0.01353	1	1045	0.1065	4228.8	0.1135
Six1(Homeobox)/Myoblast-Six1-ChIP-Chip(GSE20150)/Homer	GKVTCADRTTWC	1	-0.01344	1	637	0.0649	2628.2	0.0706
EWS:ERG-fusion(ETS)/CADO_ES1-EWS:ERG-ChIP-Seq(SRA014231)/Homer	ATTTCCTGTN	1	-0.01204	1	984	0.1003	3995.2	0.1073
At2g03500(G2like)/col-At2g03500-DAP-Seq(GSE60143)/Homer	WWAGAATATTCT	1	-0.01143	1	815	0.0831	3335.7	0.0896
At1g13300(G2like)/col-At1g13300-DAP-Seq(GSE60143)/Homer	GAATCTWAGATTCYN	1	-0.01132	1	23	0.0023	134.9	0.0036
ETS(ETS)/Promoter/Homer	AACCGGAAGT	1	-0.01063	1	418	0.0426	1767.4	0.0475
Sox4(HMG)/proB-Sox4-ChIP-Seq(GSE50066)/Homer	YCTTTGTTCC	1	-0.01037	1	2210	0.2253	8757.5	0.2351
CEBP:CEBP(bZIP)/MEF-Chop-ChIP-Seq(GSE35681)/Homer	NTNATGCAAYMNNHTGMAAY	1	-0.01028	1	388	0.0396	1648.9	0.0443
Zic3(Zf)/mES-Zic3-ChIP-Seq(GSE37889)/Homer	GGCCYCCTGCTGDGH	1	-0.009949	1	67	0.0068	332.1	0.0089
RUNX2(Runt)/PCa-RUNX2-ChIP-Seq(GSE33889)/Homer	NWAACCACADNN	1	-0.009026	1	1509	0.1538	6054.9	0.1626
SCRT1(Zf)/HEK293-SCRT1.eGFP-ChIP-Seq(Encode)/Homer	GCAACAGGTG	1	-0.008926	1	377	0.0384	1608.4	0.0432
RUNX(Runt)/HPC7-Runx1-ChIP-Seq(GSE22178)/Homer	SAAACCACAG	1	-0.007954	1	1286	0.1311	5193.5	0.1394
Foxa2(Forkhead)/Liver-Foxa2-ChIP-Seq(GSE25694)/Homer	CYTGTTTACWYW	1	-0.007895	1	2341	0.2386	9278.2	0.2491
Sox15(HMG)/CPA-Sox15-ChIP-Seq(GSE62909)/Homer	RAACAATGGN	1	-0.007574	1	3244	0.3307	12748.1	0.3422
NFIL3(bZIP)/HepG2-NFIL3-ChIP-Seq(Encode)/Homer	VTTACGTAAYNNNNN	1	-0.007366	1	2815	0.287	11105.2	0.2981
Elk1(ETS)/Hela-Elk1-ChIP-Seq(GSE31477)/Homer	HACTTCCGGY	1	-0.007295	1	1111	0.1133	4514.4	0.1212
Ets1-distal(ETS)/CD4+-PolII-ChIP-Seq(Barski_et_al.)/Homer	MACAGGAAGT	1	-0.006664	1	169	0.0172	769.1	0.0206
FOXP1(Forkhead)/H9-FOXP1-ChIP-Seq(GSE31006)/Homer	NYYTGTTTACHN	1	-0.006149	1	1556	0.1586	6256.5	0.168
RFX(HTH)/K562-RFX3-ChIP-Seq(SRA012198)/Homer	CGGTTGCCATGGCAAC	1	-0.005781	1	33	0.0034	187.2	0.005
PQM-1(?)/cElegans-L3-ChIP-Seq(modEncode)/Homer	ACTGATAAGA	1	-0.005208	1	1477	0.1506	5958	0.16
NeuroG2(bHLH)/Fibroblast-NeuroG2-ChIP-Seq(GSE75910)/Homer	ACCATCTGTT	1	-0.004865	1	1404	0.1431	5676.9	0.1524
E2A(bHLH),near_PU.1/Bcell-PU.1-ChIP-Seq(GSE21512)/Homer	NVCACCTGBN	1	-0.004508	1	664	0.0677	2774.3	0.0745
GRE(NR),IR3/A549-GR-ChIP-Seq(GSE32465)/Homer	NRGVACABNVTGTYCY	1	-0.004317	1	72	0.0073	365.3	0.0098
Hoxd11(Homeobox)/ChickenMSG-Hoxd11.Flag-ChIP-Seq(GSE86088)/Homer	VGCCATAAAA	1	-0.004071	1	6895	0.7029	26629.7	0.7149
Foxh1(Forkhead)/hESC-FOXH1-ChIP-Seq(GSE29422)/Homer	NNTGTGGATTSS	1	-0.003878	1	1891	0.1928	7579.9	0.2035
HSFA1E(HSF)/col-HSFA1E-DAP-Seq(GSE60143)/Homer	TTCTAGAAGCTTCTA	1	-0.00371	1	152	0.0155	709	0.019
EBF2(EBF)/BrownAdipose-EBF2-ChIP-Seq(GSE97114)/Homer	NABTCCCWDGGGAVH	1	-0.003622	1	458	0.0467	1959.4	0.0526
Zelda(Zf)/Embryo-zld-ChIP-Seq(GSE65441)/Homer	KBCTACCTGW	1	-0.003577	1	403	0.0411	1738.2	0.0467
ZNF165(Zf)/WHIM12-ZNF165-ChIP-Seq(GSE65937)/Homer	AAGGKGRCGCAGGCA	1	-0.003442	1	12	0.0012	89.9	0.0024
MYB105(MYB)/colamp-MYB105-DAP-Seq(GSE60143)/Homer	RATWCCGTTA	1	-0.003375	1	3001	0.3059	11866.9	0.3186
HAP3(CCAATHAP3)/col-HAP3-DAP-Seq(GSE60143)/Homer	TGATGGAW	1	-0.003178	1	775	0.079	3226.7	0.0866
E2F1(E2F)/Hela-E2F1-ChIP-Seq(GSE22478)/Homer	CWGGCGGGAA	1	-0.002957	1	240	0.0245	1079.3	0.029
GATA14(C2C2gata)/col-GATA14-DAP-Seq(GSE60143)/Homer	AYCAGATCTG	1	-0.002946	1	1597	0.1628	6451.9	0.1732
Gata1(Zf)/K562-GATA1-ChIP-Seq(GSE18829)/Homer	SAGATAAGRV	1	-0.002614	1	1746	0.178	7036.7	0.1889
bcd(Homeobox)/Embryo-Bcd-ChIP-Seq(GSE86966)/Homer	VNNGGATTADNN	1	-0.002375	1	3295	0.3359	13014.3	0.3494
COUP-TFII(NR)/K562-NR2F1-ChIP-Seq(Encode)/Homer	GKBCARAGGTCA	1	-0.002347	1	1328	0.1354	5412.5	0.1453
Dorsal(RHD)/Embryo-dl-ChIP-Seq(GSE65441)/Homer	GGGAAAAMCCCG	1	-0.002236	1	285	0.0291	1270.8	0.0341
ETV4(ETS)/HepG2-ETV4-ChIP-Seq(ENCODE)/Homer	ACCGGAAGTG	1	-0.002011	1	1300	0.1325	5309.9	0.1426
ERRg(NR)/Kidney-ESRRG-ChIP-Seq(GSE104905)/Homer	GTGACCTTGRVN	1	-0.001983	1	716	0.073	3008.4	0.0808
HRE(HSF)/Striatum-HSF1-ChIP-Seq(GSE38000)/Homer	TTCTAGAABNTTCTA	1	-0.00189	1	308	0.0314	1368.6	0.0367
ZNF652/HepG2-ZNF652.Flag-ChIP-Seq(Encode)/Homer	TTAACCCTTTVNKKN	1	-0.001689	1	875	0.0892	3644.3	0.0978
Hnf1(Homeobox)/Liver-Foxa2-Chip-Seq(GSE25694)/Homer	GGTTAAWCATTAA	1	-0.001674	1	775	0.079	3248.5	0.0872
GATA(Zf),IR4/iTreg-Gata3-ChIP-Seq(GSE20898)/Homer	NAGATWNBNATCTNN	1	-0.001643	1	287	0.0293	1285.8	0.0345
Brn1(POU,Homeobox)/NPC-Brn1-ChIP-Seq(GSE35496)/Homer	TATGCWAATBAV	1	-0.001532	1	949	0.0967	3940.7	0.1058
AT1G20910(ARID)/col-AT1G20910-DAP-Seq(GSE60143)/Homer	THAATTRAWN	1	-0.00139	1	7077	0.7214	27368.2	0.7348
HSFC1(HSF)/col-HSFC1-DAP-Seq(GSE60143)/Homer	HTTCTAGAADCTTCT	1	-0.001195	1	434	0.0442	1892.3	0.0508
RUNX-AML(Runt)/CD4+-PolII-ChIP-Seq(Barski_et_al.)/Homer	GCTGTGGTTW	1	-0.001092	1	1048	0.1068	4343.2	0.1166
PGR(NR)/EndoStromal-PGR-ChIP-Seq(GSE69539)/Homer	AAGAACATWHTGTTC	1	-0.001029	1	405	0.0413	1778.1	0.0477
LBD19(LOBAS2)/colamp-LBD19-DAP-Seq(GSE60143)/Homer	CCKGAAWTTCMGGAW	1	-0.001007	1	3472	0.3539	13740.5	0.3689
ELF1(ETS)/Jurkat-ELF1-ChIP-Seq(SRA014231)/Homer	AVCCGGAAGT	1	-0.000906	1	698	0.0712	2961.3	0.0795
Foxa3(Forkhead)/Liver-Foxa3-ChIP-Seq(GSE77670)/Homer	BSNTGTTTACWYWGN	1	-0.000895	1	1013	0.1033	4212.3	0.1131
FOXA1(Forkhead)/LNCAP-FOXA1-ChIP-Seq(GSE27824)/Homer	WAAGTAAACA	1	-0.000846	1	4105	0.4185	16169.5	0.4341
GRE(NR),IR3/RAW264.7-GRE-ChIP-Seq(Unpublished)/Homer	VAGRACAKWCTGTYC	1	-0.000815	1	207	0.0211	967.6	0.026
MYB98(MYB)/col-MYB98-DAP-Seq(GSE60143)/Homer	NWDCCGTTAC	1	-0.000801	1	857	0.0874	3598.7	0.0966
Oct11(POU,Homeobox)/NCIH1048-POU2F3-ChIP-seq(GSE115123)/Homer	GATTTGCATA	1	-0.000781	1	1069	0.109	4438.3	0.1192
Tbx5(T-box)/HL1-Tbx5.biotin-ChIP-Seq(GSE21529)/Homer	AGGTGTCA	1	-0.000744	1	3631	0.3701	14365.9	0.3857
MYB77(MYB)/col-MYB77-DAP-Seq(GSE60143)/Homer	NYAACBGYMC	1	-0.000583	1	3083	0.3143	12276.4	0.3296
At3g11280(MYBrelated)/col-At3g11280-DAP-Seq(GSE60143)/Homer	GATAAGRT	1	-0.000583	1	3134	0.3195	12472.8	0.3349
TATA-box/SacCer-Promoters/Homer	BBHWTATATA	1	-0.000565	1	3558	0.3627	14100.4	0.3786
Unknown-ESC-element(?)/mES-Nanog-ChIP-Seq(GSE11724)/Homer	CACAGCAGGGGG	1	-0.000528	1	94	0.0096	489.6	0.0131
Oct2(POU,Homeobox)/Bcell-Oct2-ChIP-Seq(GSE21512)/Homer	ATATGCAAAT	1	-0.00049	1	1098	0.1119	4569.4	0.1227
Twist2(bHLH)/Myoblast-Twist2.Ty1-ChIP-Seq(GSE127998)/Homer	MCAGCTGBYH	1	-0.000463	1	1397	0.1424	5748.2	0.1543
TCFL2(HMG)/K562-TCF7L2-ChIP-Seq(GSE29196)/Homer	ACWTCAAAGG	1	-0.000453	1	168	0.0171	812.1	0.0218
Six4(Homeobox)/MCF7-SIX4-ChIP-Seq(Encode)/Homer	TGWAAYCTGABACCB	1	-0.000424	1	90	0.0092	474.3	0.0127
AIL7(AP2EREBP)/colamp-AIL7-DAP-Seq(GSE60143)/Homer	KCACRAWTYYCGAGG	1	-0.000321	1	1066	0.1087	4457.5	0.1197
ASL18(LOBAS2)/colamp-ASL18-DAP-Seq(GSE60143)/Homer	CCGGAAAWTCMGGAR	1	-0.000299	1	2300	0.2345	9286.2	0.2493
ANAC087(NAC)/col-ANAC087-DAP-Seq(GSE60143)/Homer	WVCKTGHNNNWCAMG	1	-0.000298	1	791	0.0806	3366.4	0.0904
MYB119(MYB)/colamp-MYB119-DAP-Seq(GSE60143)/Homer	YRACCGTTACDD	1	-0.000278	1	1441	0.1469	5941	0.1595
STAT5(Stat)/mCD4+-Stat5-ChIP-Seq(GSE12346)/Homer	RTTTCTNAGAAA	1	-0.000265	1	619	0.0631	2679.6	0.0719
TBP3(MYBrelated)/col-TBP3-DAP-Seq(GSE60143)/Homer	VYTAGGGCAN	1	-0.000244	1	1892	0.1929	7709.3	0.207
HSF6(HSF)/col-HSF6-DAP-Seq(GSE60143)/Homer	TTYTAGAAGCTTCTA	1	-0.000215	1	559	0.057	2443	0.0656
AT5G05550(Trihelix)/col-AT5G05550-DAP-Seq(GSE60143)/Homer	HDNHDTCKCCGGMGA	1	-0.000212	1	3252	0.3315	12975.4	0.3483
Tgif2(Homeobox)/mES-Tgif2-ChIP-Seq(GSE55404)/Homer	TGTCANYT	1	-0.000198	1	5044	0.5142	19815.4	0.532
Barx1(Homeobox)/Stomach-Barx1.3xFlag-ChIP-Seq(GSE69483)/Homer	AAACMATTAN	1	-0.000173	1	2413	0.246	9748.2	0.2617
E2F7(E2F)/Hela-E2F7-ChIP-Seq(GSE32673)/Homer	VDTTTCCCGCCA	1	-0.000169	1	164	0.0167	810.8	0.0218
X-box(HTH)/NPC-H3K4me1-ChIP-Seq(GSE16256)/Homer	GGTTGCCATGGCAA	1	-0.000162	1	85	0.0087	463.4	0.0124
ELT-3(Gata)/cElegans-L1-ELT3-ChIP-Seq(modEncode)/Homer	AWTGATAAGA	1	-0.000144	1	2069	0.2109	8420.5	0.2261
BMYB(HTH)/Hela-BMYB-ChIP-Seq(GSE27030)/Homer	NHAACBGYYV	1	-0.000136	1	3531	0.3599	14067.3	0.3777
AGL95(ND)/col-AGL95-DAP-Seq(GSE60143)/Homer	TTCTAGAAGCTTCTA	1	-0.000127	1	216	0.022	1037.4	0.0279
ARF16(ARF)/col-ARF16-DAP-Seq(GSE60143)/Homer	ATTTTACGAT	1	-0.00011	1	1266	0.1291	5284.7	0.1419
Stat3(Stat)/mES-Stat3-ChIP-Seq(GSE11431)/Homer	CTTCCGGGAA	1	-9.9e-05	1	543	0.0554	2396	0.0643
Fox:Ebox(Forkhead,bHLH)/Panc1-Foxa2-ChIP-Seq(GSE47459)/Homer	NNNVCTGWGYAAACASN	1	-9.2e-05	1	1738	0.1772	7146.8	0.1919
At5g08750(C3H)/col-At5g08750-DAP-Seq(GSE60143)/Homer	NWDTTGCGGCTR	1	-9e-05	1	1720	0.1753	7077	0.19
PBX2(Homeobox)/K562-PBX2-ChIP-Seq(Encode)/Homer	RTGATTKATRGN	1	-7.5e-05	1	3461	0.3528	13826.7	0.3712
AP-2alpha(AP2)/Hela-AP2alpha-ChIP-Seq(GSE31477)/Homer	ATGCCCTGAGGC	1	-6.5e-05	1	123	0.0125	644.8	0.0173
ETS1(ETS)/Jurkat-ETS1-ChIP-Seq(GSE17954)/Homer	ACAGGAAGTG	1	-5.6e-05	1	1099	0.112	4644.8	0.1247
GATA4(C2C2gata)/col-GATA4-DAP-Seq(GSE60143)/Homer	DDWTYAGATCTR	1	-5.3e-05	1	2446	0.2493	9926.2	0.2665
AT2G01818(PLATZ)/col-AT2G01818-DAP-Seq(GSE60143)/Homer	TCTAGAABSTTC	1	-5.1e-05	1	293	0.0299	1378.8	0.037
NFkB-p65(RHD)/GM12787-p65-ChIP-Seq(GSE19485)/Homer	WGGGGATTTCCC	1	-5e-05	1	451	0.046	2035.5	0.0546
At5g05790(MYBrelated)/col-At5g05790-DAP-Seq(GSE60143)/Homer	AYCTTATC	1	-4.6e-05	1	3327	0.3391	13333.8	0.358
Zic(Zf)/Cerebellum-ZIC1.2-ChIP-Seq(GSE60731)/Homer	CCTGCTGAGH	1	-3.2e-05	1	262	0.0267	1256	0.0337
ZNF341(Zf)/EBV-ZNF341-ChIP-Seq(GSE113194)/Homer	GGAACAGCCG	1	-2.8e-05	1	395	0.0403	1815.8	0.0487
HLF(bZIP)/HSC-HLF.Flag-ChIP-Seq(GSE69817)/Homer	RTTATGYAAB	1	-2.5e-05	1	3314	0.3378	13310.5	0.3573
ANAC092(NAC)/colamp-ANAC092-DAP-Seq(GSE60143)/Homer	WRCKTGWNNNWCAMG	1	-2.4e-05	1	1108	0.1129	4705.2	0.1263
OCT:OCT(POU,Homeobox)/NPC-OCT6-ChIP-Seq(GSE43916)/Homer	YATGCATATRCATRT	1	-2.2e-05	1	560	0.0571	2500.1	0.0671
AT1G47655(C2C2dof)/colamp-AT1G47655-DAP-Seq(GSE60143)/Homer	YHACTTTTTS	1	-2.2e-05	1	8597	0.8764	33130.2	0.8894
At1g19000(MYBrelated)/colamp-At1g19000-DAP-Seq(GSE60143)/Homer	WWTGGATAADDT	1	-2.1e-05	1	3566	0.3635	14285.7	0.3835
ERG(ETS)/VCaP-ERG-ChIP-Seq(GSE14097)/Homer	ACAGGAAGTG	1	-1.8e-05	1	1478	0.1507	6182.2	0.166
Tbr1(T-box)/Cortex-Tbr1-ChIP-Seq(GSE71384)/Homer	AAGGTGTKAA	1	-1.6e-05	1	2957	0.3014	11952	0.3209
HSF7(HSF)/colamp-HSF7-DAP-Seq(GSE60143)/Homer	TTCTAGAAGCTTCTA	1	-1.4e-05	1	509	0.0519	2300.5	0.0618
ANAC057(NAC)/colamp-ANAC057-DAP-Seq(GSE60143)/Homer	DVCKTGNNNNNCAMG	1	-1.4e-05	1	1747	0.1781	7248.3	0.1946
Sox9(HMG)/Limb-SOX9-ChIP-Seq(GSE73225)/Homer	AGGVNCCTTTGT	1	-1.2e-05	1	1536	0.1566	6422.7	0.1724
Chop(bZIP)/MEF-Chop-ChIP-Seq(GSE35681)/Homer	ATTGCATCAT	1	-1.2e-05	1	678	0.0691	2995.8	0.0804
At5g47390(MYBrelated)/col-At5g47390-DAP-Seq(GSE60143)/Homer	CTTATCCA	1	-1.1e-05	1	3695	0.3767	14805.6	0.3975
AT1G72740(MYBrelated)/colamp-AT1G72740-DAP-Seq(GSE60143)/Homer	NNWWAMCCTAAHWNN	1	-1.1e-05	1	3081	0.3141	12445.6	0.3341
Erra(NR)/HepG2-Erra-ChIP-Seq(GSE31477)/Homer	CAAAGGTCAG	1	-1.1e-05	1	1646	0.1678	6861.6	0.1842
RUNX1(Runt)/Jurkat-RUNX1-ChIP-Seq(GSE29180)/Homer	AAACCACARM	1	-1e-05	1	1904	0.1941	7875	0.2114
GLIS3(Zf)/Thyroid-Glis3.GFP-ChIP-Seq(GSE103297)/Homer	CTCCCTGGGAGGCCN	1	-1e-05	1	310	0.0316	1478.7	0.0397
OCT:OCT-short(POU,Homeobox)/NPC-OCT6-ChIP-Seq(GSE43916)/Homer	ATGCATWATGCATRW	1	-1e-05	1	2846	0.2901	11543.4	0.3099
Gata4(Zf)/Heart-Gata4-ChIP-Seq(GSE35151)/Homer	NBWGATAAGR	1	-6e-06	1	3269	0.3332	13193.8	0.3542
GRHL2(CP2)/HBE-GRHL2-ChIP-Seq(GSE46194)/Homer	AAACYKGTTWDACMRGTTTB	1	-5e-06	1	632	0.0644	2826.9	0.0759
MYB118(MYB)/colamp-MYB118-DAP-Seq(GSE60143)/Homer	TAWCCGTTAC	1	-5e-06	1	1099	0.112	4713.8	0.1266
GABPA(ETS)/Jurkat-GABPa-ChIP-Seq(GSE17954)/Homer	RACCGGAAGT	1	-5e-06	1	956	0.0975	4140.3	0.1112
Rfx1(HTH)/NPC-H3K4me1-ChIP-Seq(GSE16256)/Homer	KGTTGCCATGGCAA	1	-5e-06	1	135	0.0138	730.6	0.0196
CCA(Myb)/Arabidopsis-CCA.GFP-ChIP-Seq(GSE70533)/Homer	AGATATYTTT	1	-4e-06	1	3118	0.3178	12625.5	0.339
HRE(HSF)/HepG2-HSF1-ChIP-Seq(GSE31477)/Homer	BSTTCTRGAABVTTCYAGAA	1	-4e-06	1	99	0.0101	569.2	0.0153
ETV1(ETS)/GIST48-ETV1-ChIP-Seq(GSE22441)/Homer	AACCGGAAGT	1	-3e-06	1	1513	0.1542	6376.9	0.1712
EHF(ETS)/LoVo-EHF-ChIP-Seq(GSE49402)/Homer	AVCAGGAAGT	1	-3e-06	1	2023	0.2062	8384.3	0.2251
MYB(HTH)/ERMYB-Myb-ChIPSeq(GSE22095)/Homer	GGCVGTTR	1	-3e-06	1	4003	0.4081	16040.1	0.4306
FOXK2(Forkhead)/U2OS-FOXK2-ChIP-Seq(E-MTAB-2204)/Homer	SCHTGTTTACAT	1	-2e-06	1	1703	0.1736	7134.3	0.1915
CUC2(NAC)/colamp-CUC2-DAP-Seq(GSE60143)/Homer	TRCKTGTNNNWCAMG	1	-2e-06	1	926	0.0944	4041.8	0.1085
Fli1(ETS)/CD8-FLI-ChIP-Seq(GSE20898)/Homer	NRYTTCCGGH	1	-2e-06	1	1714	0.1747	7185	0.1929
Unknown5/Drosophila-Promoters/Homer	GCTGATAASV	1	-2e-06	1	1511	0.154	6386.5	0.1715
Pdx1(Homeobox)/Islet-Pdx1-ChIP-Seq(SRA008281)/Homer	YCATYAATCA	1	-1e-06	1	3749	0.3822	15093.1	0.4052
Nkx6.1(Homeobox)/Islet-Nkx6.1-ChIP-Seq(GSE40975)/Homer	GKTAATGR	1	-1e-06	1	7882	0.8035	30609.9	0.8218
Foxo1(Forkhead)/RAW-Foxo1-ChIP-Seq(Fan_et_al.)/Homer	CTGTTTAC	1	-1e-06	1	3769	0.3842	15182	0.4076
CUC3(NAC)/col-CUC3-DAP-Seq(GSE60143)/Homer	TRCKTGWNNNACAMG	1	-1e-06	1	1019	0.1039	4444.3	0.1193
VND6(NAC)/col-VND6-DAP-Seq(GSE60143)/Homer	DCTTNHTTTTYAMGY	1	-1e-06	1	2650	0.2701	10882.4	0.2922
Rfx5(HTH)/GM12878-Rfx5-ChIP-Seq(GSE31477)/Homer	SCCTAGCAACAG	1	-1e-06	1	260	0.0265	1307.2	0.0351
Nr5a2(NR)/mES-Nr5a2-ChIP-Seq(GSE19019)/Homer	BTCAAGGTCA	1	-1e-06	1	345	0.0352	1674.7	0.045
Otx2(Homeobox)/EpiLC-Otx2-ChIP-Seq(GSE56098)/Homer	NYTAATCCYB	1	-1e-06	1	2415	0.2462	9973	0.2677
ZNF415(Zf)/HEK293-ZNF415.GFP-ChIP-Seq(GSE58341)/Homer	GRTGMTRGAGCC	1	-1e-06	1	320	0.0326	1568.4	0.0421
FoxL2(Forkhead)/Ovary-FoxL2-ChIP-Seq(GSE60858)/Homer	WWTRTAAACAVG	1	0	1	3394	0.346	13774.5	0.3698
AP-2gamma(AP2)/MCF7-TFAP2C-ChIP-Seq(GSE21234)/Homer	SCCTSAGGSCAW	1	0	1	188	0.0192	1000.4	0.0269
RBFox2(?)/Heart-RBFox2-CLIP-Seq(GSE57926)/Homer	TGCATGCA	1	0	1	2810	0.2864	11536.4	0.3097
HNF6(Homeobox)/Liver-Hnf6-ChIP-Seq(ERP000394)/Homer	NTATYGATCH	1	0	1	3335	0.34	13575.9	0.3645
THRb(NR)/Liver-NR1A2-ChIP-Seq(GSE52613)/Homer	TRAGGTCA	1	0	1	4203	0.4284	16908.5	0.4539
STOP1(C2H2)/colamp-STOP1-DAP-Seq(GSE60143)/Homer	DTATCTGGKGRAGGT	1	0	1	528	0.0538	2467.9	0.0663
Oct4(POU,Homeobox)/mES-Oct4-ChIP-Seq(GSE11431)/Homer	ATTTGCATAW	1	0	1	1492	0.1521	6378.7	0.1712
EWS:FLI1-fusion(ETS)/SK_N_MC-EWS:FLI1-ChIP-Seq(SRA014231)/Homer	VACAGGAAAT	1	0	1	479	0.0488	2264.1	0.0608
Atf4(bZIP)/MEF-Atf4-ChIP-Seq(GSE35681)/Homer	MTGATGCAAT	1	0	1	876	0.0893	3903.5	0.1048
SRS7(SRS)/colamp-SRS7-DAP-Seq(GSE60143)/Homer	HATAGGTTTH	1	0	1	4789	0.4882	19149	0.5141
GATA(Zf),IR3/iTreg-Gata3-ChIP-Seq(GSE20898)/Homer	NNNNNBAGATAWYATCTVHN	1	0	1	526	0.0536	2464.8	0.0662
Stat3+il21(Stat)/CD4-Stat3-ChIP-Seq(GSE19198)/Homer	SVYTTCCNGGAARB	1	0	1	830	0.0846	3720.7	0.0999
bZIP18(bZIP)/colamp-bZIP18-DAP-Seq(GSE60143)/Homer	KGMCAGCTND	1	0	1	4951	0.5047	19775.6	0.5309
Tcf3(HMG)/mES-Tcf3-ChIP-Seq(GSE11724)/Homer	ASWTCAAAGG	1	0	1	621	0.0633	2864.8	0.0769
ELF3(ETS)/PDAC-ELF3-ChIP-Seq(GSE64557)/Homer	ANCAGGAAGT	1	0	1	923	0.0941	4108.3	0.1103
AT5G61620(MYBrelated)/colamp-AT5G61620-DAP-Seq(GSE60143)/Homer	CTTATCCA	1	0	1	3967	0.4044	16039.2	0.4306
LIN-39(Homeobox)/cElegans.L3-LIN39-ChIP-Seq(modEncode)/Homer	ATGATTRATG	1	0	1	5139	0.5239	20500.4	0.5504
ANAC017(NAC)/colamp-ANAC017-DAP-Seq(GSE60143)/Homer	TMCTTGNNNNNCAAG	1	0	1	185	0.0189	1007.3	0.027
ELF5(ETS)/T47D-ELF5-ChIP-Seq(GSE30407)/Homer	ACVAGGAAGT	1	0	1	1052	0.1072	4639.3	0.1246
Bapx1(Homeobox)/VertebralCol-Bapx1-ChIP-Seq(GSE36672)/Homer	TTRAGTGSYK	1	0	1	3220	0.3282	13184.2	0.354
Hoxa13(Homeobox)/ChickenMSG-Hoxa13.Flag-ChIP-Seq(GSE86088)/Homer	CYHATAAAAN	1	0	1	7309	0.7451	28613.9	0.7682
Foxo3(Forkhead)/U2OS-Foxo3-ChIP-Seq(E-MTAB-2701)/Homer	DGTAAACA	1	0	1	2543	0.2592	10563.9	0.2836
ASHR1(ND)/col-ASHR1-DAP-Seq(GSE60143)/Homer	NTGGTGAN	1	0	1	2272	0.2316	9503.1	0.2551
SeqBias: polyC-repeat	CCCCCCCCCC	1	0	1	9701	0.9889	37011.7	0.9937
ANAC071(NAC)/col-ANAC071-DAP-Seq(GSE60143)/Homer	DNCKTNDNNNHNAAG	1	0	1	2237	0.228	9370.5	0.2516
TSO1(CPP)/col-TSO1-DAP-Seq(GSE60143)/Homer	RAATTTRAAW	1	0	1	958	0.0977	4278.4	0.1149
PSE(SNAPc)/K562-mStart-Seq/Homer	WAVTCACCMTAASYDAAAAG	1	0	1	1829	0.1864	7772.7	0.2087
Cux2(Homeobox)/Liver-Cux2-ChIP-Seq(GSE35985)/Homer	HNRAATCAAT	1	0	1	2938	0.2995	12121.7	0.3254
Hnf6b(Homeobox)/LNCaP-Hnf6b-ChIP-Seq(GSE106305)/Homer	TATTGAYY	1	0	1	4060	0.4139	16444.7	0.4415
Foxf1(Forkhead)/Lung-Foxf1-ChIP-Seq(GSE77951)/Homer	WWATRTAAACAN	1	0	1	3699	0.3771	15061.9	0.4044
CUC1(NAC)/col-CUC1-DAP-Seq(GSE60143)/Homer	TACTTGTNNNACAAG	1	0	1	1042	0.1062	4629	0.1243
Nr5a2(NR)/Pancreas-LRH1-ChIP-Seq(GSE34295)/Homer	BTCAAGGTCA	1	0	1	524	0.0534	2493.8	0.067
KANADI1(Myb)/Seedling-KAN1-ChIP-Seq(GSE48081)/Homer	ARGAATAWWN	1	0	1	4183	0.4264	16921.3	0.4543
Sox17(HMG)/Endoderm-Sox17-ChIP-Seq(GSE61475)/Homer	CCATTGTTYB	1	0	1	1951	0.1989	8266.5	0.2219
At5g08520(MYBrelated)/colamp-At5g08520-DAP-Seq(GSE60143)/Homer	ADBSTTATCY	1	0	1	3109	0.3169	12807.8	0.3439
ANAC020(NAC)/col-ANAC020-DAP-Seq(GSE60143)/Homer	DVCKTGHNNNDCAAG	1	0	1	1500	0.1529	6490.4	0.1742
DMRT6(DM)/Testis-DMRT6-ChIP-Seq(GSE60440)/Homer	YDGHTACAWTGTADC	1	0	1	480	0.0489	2320.3	0.0623
At2g41835(C2H2)/col-At2g41835-DAP-Seq(GSE60143)/Homer	TTTGAAAA	1	0	1	2494	0.2542	10422.2	0.2798
LBD18(LOBAS2)/colamp-LBD18-DAP-Seq(GSE60143)/Homer	CKGAWWTTCHGS	1	0	1	5337	0.544	21331.8	0.5727
AT1G76880(Trihelix)/col-AT1G76880-DAP-Seq(GSE60143)/Homer	ACGGTAAAAW	1	0	1	1579	0.161	6817.7	0.183
Hoxa9(Homeobox)/ChickenMSG-Hoxa9.Flag-ChIP-Seq(GSE86088)/Homer	RGCAATNAAA	1	0	1	7029	0.7165	27649.2	0.7423
Nkx2.2(Homeobox)/NPC-Nkx2.2-ChIP-Seq(GSE61673)/Homer	BTBRAGTGSN	1	0	1	2595	0.2645	10835.9	0.2909
ANAC016(NAC)/col-ANAC016-DAP-Seq(GSE60143)/Homer	WNCTTGNNNNNCAMG	1	0	1	1753	0.1787	7522.3	0.202
Gata6(Zf)/HUG1N-GATA6-ChIP-Seq(GSE51936)/Homer	YCTTATCTBN	1	0	1	2946	0.3003	12207.6	0.3277
Tcf7(HMG)/GM12878-TCF7-ChIP-Seq(Encode)/Homer	CTTTGATGTGSB	1	0	1	812	0.0828	3731	0.1002
AT4G12670(MYBrelated)/col-AT4G12670-DAP-Seq(GSE60143)/Homer	AGGGTTTAGGGTTTA	1	0	1	11	0.0011	163.7	0.0044
IRF4(IRF)/GM12878-IRF4-ChIP-Seq(GSE32465)/Homer	ACTGAAACCA	1	0	1	1206	0.1229	5347.4	0.1436
AT5G56840(MYBrelated)/colamp-AT5G56840-DAP-Seq(GSE60143)/Homer	TGGATAAGGT	1	0	1	4033	0.4111	16425	0.441
ANAC083(NAC)/col-ANAC083-DAP-Seq(GSE60143)/Homer	CKTRWNNNWYAMGTA	1	0	1	2275	0.2319	9611.3	0.258
SFP1/SacCer-Promoters/Homer	DDAAAAATTTTY	1	0	1	407	0.0415	2036.8	0.0547
CEBP(bZIP)/ThioMac-CEBPb-ChIP-Seq(GSE21512)/Homer	ATTGCGCAAC	1	0	1	2646	0.2697	11069.3	0.2972
Unknown2/Drosophila-Promoters/Homer	CATCMCTA	1	0	1	1052	0.1072	4729.9	0.127
Eomes(T-box)/H9-Eomes-ChIP-Seq(GSE26097)/Homer	ATTAACACCT	1	0	1	4360	0.4444	17694.8	0.4751
Unknown6/Drosophila-Promoters/Homer	AATTTTAAAA	1	0	1	4307	0.439	17493.7	0.4697
Olig2(bHLH)/Neuron-Olig2-ChIP-Seq(GSE30882)/Homer	RCCATMTGTT	1	0	1	2314	0.2359	9782.1	0.2626
EMB1789(C3H)/col-EMB1789-DAP-Seq(GSE60143)/Homer	TWTTTACCGYND	1	0	1	1669	0.1701	7236.6	0.1943
ANAC058(NAC)/col-ANAC058-DAP-Seq(GSE60143)/Homer	TWCTTGTDNNACAAG	1	0	1	1435	0.1463	6303	0.1692
Tgif1(Homeobox)/mES-Tgif1-ChIP-Seq(GSE55404)/Homer	YTGWCADY	1	0	1	4863	0.4957	19637.1	0.5272
ANAC050(NAC)/colamp-ANAC050-DAP-Seq(GSE60143)/Homer	WNCTTGNNNNNCAAG	1	0	1	1239	0.1263	5521.7	0.1482
ANAC075(NAC)/col-ANAC075-DAP-Seq(GSE60143)/Homer	CTTSWWNWWSAAGYT	1	0	1	799	0.0814	3722.2	0.0999
CUX1(Homeobox)/K562-CUX1-ChIP-Seq(GSE92882)/Homer	TATCGATNAN	1	0	1	4176	0.4257	17034.9	0.4573
Elf4(ETS)/BMDM-Elf4-ChIP-Seq(GSE88699)/Homer	ACTTCCKGKT	1	0	1	1139	0.1161	5123.3	0.1375
VND2(NAC)/col-VND2-DAP-Seq(GSE60143)/Homer	DNCKTNNNNNNNAAG	1	0	1	2264	0.2308	9625.2	0.2584
FOXK1(Forkhead)/HEK293-FOXK1-ChIP-Seq(GSE51673)/Homer	NVWTGTTTAC	1	0	1	3587	0.3656	14779.1	0.3968
GSC(Homeobox)/FrogEmbryos-GSC-ChIP-Seq(DRA000576)/Homer	RGGATTAR	1	0	1	3798	0.3872	15595.1	0.4187
SND3(NAC)/col-SND3-DAP-Seq(GSE60143)/Homer	CTTNHNNNDNAAGNH	1	0	1	1834	0.187	7930.5	0.2129
AZF1(C2H2)/colamp-AZF1-DAP-Seq(GSE60143)/Homer	DKSWCACT	1	0	1	6823	0.6955	26990.5	0.7246
TEAD(TEA)/Fibroblast-PU.1-ChIP-Seq(Unpublished)/Homer	YCWGGAATGY	1	0	1	978	0.0997	4474.2	0.1201
SMB(NAC)/colamp-SMB-DAP-Seq(GSE60143)/Homer	CTTVNNNNDBAAGHW	1	0	1	2351	0.2397	9993.5	0.2683
AT5G60130(ABI3VP1)/col-AT5G60130-DAP-Seq(GSE60143)/Homer	WTTYTAAGVAAA	1	0	1	6846	0.6979	27090.8	0.7273
VND3(NAC)/colamp-VND3-DAP-Seq(GSE60143)/Homer	TRCTTGWDNHWCAAG	1	0	1	1678	0.171	7327.5	0.1967
STAT6(Stat)/Macrophage-Stat6-ChIP-Seq(GSE38377)/Homer	TTCCKNAGAA	1	0	1	1232	0.1256	5529.5	0.1485
ANAC028(NAC)/col-ANAC028-DAP-Seq(GSE60143)/Homer	WRCTTGNNNNNCAAG	1	0	1	1668	0.17	7290.4	0.1957
Nkx2.5(Homeobox)/HL1-Nkx2.5.biotin-ChIP-Seq(GSE21529)/Homer	RRSCACTYAA	1	0	1	3192	0.3254	13288	0.3567
At1g68670(G2like)/colamp-At1g68670-DAP-Seq(GSE60143)/Homer	WNWWHNRAAGATTCT	1	0	1	2393	0.2439	10192.6	0.2736
NTM1(NAC)/col-NTM1-DAP-Seq(GSE60143)/Homer	ACTTRTARAASAAGT	1	0	1	909	0.0927	4235.8	0.1137
VND1(NAC)/col-VND1-DAP-Seq(GSE60143)/Homer	CTTRWDNHWYAAGYW	1	0	1	2166	0.2208	9310.8	0.25
VND4(NAC)/colamp-VND4-DAP-Seq(GSE60143)/Homer	WRCTTGWANWWCAAG	1	0	1	1824	0.1859	7951.2	0.2135
Tcf4(HMG)/Hct116-Tcf4-ChIP-Seq(SRA012054)/Homer	ASATCAAAGGVA	1	0	1	1192	0.1215	5402.3	0.145
AT3G09735(S1Falike)/col-AT3G09735-DAP-Seq(GSE60143)/Homer	TTCTAGAANMTTCTA	1	0	1	950	0.0968	4411.2	0.1184
Rfx6(HTH)/Min6b1-Rfx6.HA-ChIP-Seq(GSE62844)/Homer	TGTTKCCTAGCAACM	1	0	1	830	0.0846	3919.3	0.1052
ZEB1(Zf)/PDAC-ZEB1-ChIP-Seq(GSE64557)/Homer	VCAGGTRDRY	1	0	1	935	0.0953	4369.1	0.1173
ANAC013(NAC)/col-ANAC013-DAP-Seq(GSE60143)/Homer	CTTGNNNNNCAAGNA	1	0	1	874	0.0891	4116.5	0.1105
CEBP:AP1(bZIP)/ThioMac-CEBPb-ChIP-Seq(GSE21512)/Homer	DRTGTTGCAA	1	0	1	2012	0.2051	8735.6	0.2345
ANAC005(NAC)/col-ANAC005-DAP-Seq(GSE60143)/Homer	WVCTTVTWNHABAAG	1	0	1	1119	0.1141	5131.5	0.1378
SND2(NAC)/colamp-SND2-DAP-Seq(GSE60143)/Homer	CTTVWNNNWBAAGNW	1	0	1	1228	0.1252	5586.9	0.15
AT2G33550(Trihelix)/colamp-AT2G33550-DAP-Seq(GSE60143)/Homer	TTTAAGGGCAYTTTT	1	0	1	5765	0.5877	23182.2	0.6224
ANAC053(NAC)/colamp-ANAC053-DAP-Seq(GSE60143)/Homer	TDCTTGNNNNNCAAG	1	0	1	1181	0.1204	5415.9	0.1454
STAT6(Stat)/CD4-Stat6-ChIP-Seq(GSE22104)/Homer	ABTTCYYRRGAA	1	0	1	1360	0.1386	6149.3	0.1651
ANAC004(NAC)/colamp-ANAC004-DAP-Seq(GSE60143)/Homer	WNCTTVYNNNRBAAG	1	0	1	696	0.0709	3412.5	0.0916
DMRT1(DM)/Testis-DMRT1-ChIP-Seq(GSE64892)/Homer	TWGHWACAWTGTWDC	1	0	1	699	0.0713	3429.4	0.0921
SPDEF(ETS)/VCaP-SPDEF-ChIP-Seq(SRA014231)/Homer	ASWTCCTGBT	1	0	1	927	0.0945	4390.6	0.1179
NAC2(NAC)/colamp-NAC2-DAP-Seq(GSE60143)/Homer	TDCTTGNNNNNCAAG	1	0	1	1589	0.162	7116.5	0.1911
TEAD1(TEAD)/HepG2-TEAD1-ChIP-Seq(Encode)/Homer	CYRCATTCCA	1	0	1	1574	0.1604	7064.6	0.1897
LEF1(HMG)/H1-LEF1-ChIP-Seq(GSE64758)/Homer	CCTTTGATST	1	0	1	1899	0.1936	8379.4	0.225
STAT4(Stat)/CD4-Stat4-ChIP-Seq(GSE22104)/Homer	NYTTCCWGGAAR	1	0	1	1828	0.1863	8098	0.2174
MYB65(MYB)/colamp-MYB65-DAP-Seq(GSE60143)/Homer	RACNGTTA	1	0	1	3216	0.3278	13600.5	0.3651
TEAD2(TEA)/Py2T-Tead2-ChIP-Seq(GSE55709)/Homer	CCWGGAATGY	1	0	1	418	0.0426	2248	0.0604
KAN2(G2like)/colamp-KAN2-DAP-Seq(GSE60143)/Homer	ATATTCTY	1	0	1	3864	0.3939	16114.1	0.4326
NTM2(NAC)/col-NTM2-DAP-Seq(GSE60143)/Homer	CTTRTNNNAYAAGBH	1	0	1	1210	0.1233	5622.5	0.1509
HSFA6B(HSF)/colamp-HSFA6B-DAP-Seq(GSE60143)/Homer	NTTCTAGAANHTTCT	1	0	1	1365	0.1391	6263	0.1681
ANAC096(NAC)/colamp-ANAC096-DAP-Seq(GSE60143)/Homer	TACTTGWNNNWCAAG	1	0	1	1541	0.1571	6990.4	0.1877
ANAC062(NAC)/colamp-ANAC062-DAP-Seq(GSE60143)/Homer	TACTTANTNWNYAAG	1	0	1	755	0.077	3738	0.1004
AT1G19040(NAC)/col-AT1G19040-DAP-Seq(GSE60143)/Homer	CTTGNDNHNCAAGYW	1	0	1	143	0.0146	985.4	0.0265
Sox3(HMG)/NPC-Sox3-ChIP-Seq(GSE33059)/Homer	CCWTTGTY	1	0	1	4377	0.4462	18134.9	0.4869
Sox10(HMG)/SciaticNerve-Sox3-ChIP-Seq(GSE35132)/Homer	CCWTTGTYYB	1	0	1	3654	0.3725	15365.7	0.4125
Tal1	CATCTG	1	0	1	1206	0.1229	5647.6	0.1516
Pit1(Homeobox)/GCrat-Pit1-ChIP-Seq(GSE58009)/Homer	ATGMATATDC	1	0	1	3695	0.3767	15534.9	0.4171
AR-halfsite(NR)/LNCaP-AR-ChIP-Seq(GSE27824)/Homer	CCAGGAACAG	1	0	1	3132	0.3193	13560.7	0.3641
Bcl6(Zf)/Liver-Bcl6-ChIP-Seq(GSE31578)/Homer	NNNCTTTCCAGGAAA	1	0	1	1797	0.1832	8098.2	0.2174
CHR(?)/Hela-CellCycle-Expression/Homer	SRGTTTCAAA	1	0	1	2571	0.2621	11814	0.3172
CRX(Homeobox)/Retina-Crx-ChIP-Seq(GSE20012)/Homer	GCTAATCC	1	0	1	5618	0.5727	23174.2	0.6222
GATA3(Zf)/iTreg-Gata3-ChIP-Seq(GSE20898)/Homer	AGATAASR	1	0	1	4577	0.4666	19234.2	0.5164
Hoxd12(Homeobox)/ChickenMSG-Hoxd12.Flag-ChIP-Seq(GSE86088)/Homer	HDGYAATGAAAN	1	0	1	5701	0.5811	23479	0.6303
Nanog(Homeobox)/mES-Nanog-ChIP-Seq(GSE11724)/Homer	RGCCATTAAC	1	0	1	7678	0.7827	31105.7	0.8351
Nkx2.1(Homeobox)/LungAC-Nkx2.1-ChIP-Seq(GSE43252)/Homer	RSCACTYRAG	1	0	1	3911	0.3987	16974.2	0.4557
Nkx3.1(Homeobox)/LNCaP-Nkx3.1-ChIP-Seq(GSE28264)/Homer	AAGCACTTAA	1	0	1	3263	0.3326	14064.6	0.3776
Pitx1(Homeobox)/Chicken-Pitx1-ChIP-Seq(GSE38910)/Homer	TAATCCCN	1	0	1	7994	0.8149	32425.3	0.8705
PR(NR)/T47D-PR-ChIP-Seq(GSE31130)/Homer	VAGRACAKNCTGTBC	1	0	1	2608	0.2659	11572.7	0.3107
RARa(NR)/K562-RARa-ChIP-Seq(Encode)/Homer	TTGAMCTTTG	1	0	1	4139	0.4219	17293.8	0.4643
SCL(bHLH)/HPC7-Scl-ChIP-Seq(GSE13511)/Homer	AVCAGCTG	1	0	1	3327	0.3391	14602.2	0.392
Six2(Homeobox)/NephronProgenitor-Six2-ChIP-Seq(GSE39837)/Homer	GWAAYHTGAKMC	1	0	1	2722	0.2775	12012	0.3225
Sox6(HMG)/Myotubes-Sox6-ChIP-Seq(GSE32627)/Homer	CCATTGTTNY	1	0	1	4621	0.471	19245.1	0.5167
TEAD3(TEA)/HepG2-TEAD3-ChIP-Seq(Encode)/Homer	TRCATTCCAG	1	0	1	1896	0.1933	8537.7	0.2292
TEAD4(TEA)/Tropoblast-Tead4-ChIP-Seq(GSE37350)/Homer	CCWGGAATGY	1	0	1	819	0.0835	4093.6	0.1099
TRPS1(Zf)/MCF7-TRPS1-ChIP-Seq(GSE107013)/Homer	AGATAAGANN	1	0	1	5568	0.5676	23801.6	0.639
ZBTB12(Zf)/HEK293-ZBTB12.GFP-ChIP-Seq(GSE58341)/Homer	NGNTCTAGAACCNGV	1	0	1	359	0.0366	2149.7	0.0577
ZFP3(Zf)/HEK293-ZFP3.GFP-ChIP-Seq(GSE58341)/Homer	GGGTTTTGAAGGATGARTAGGAGTT	1	0	1	0	0	12.1	0.0003
Initiator/Drosophila-Promoters/Homer	NTCAGTYG	1	0	1	3476	0.3543	15033.2	0.4036
ANAC011(NAC)/col-ANAC011-DAP-Seq(GSE60143)/Homer	TDCTTGYRNNDCAAG	1	0	1	695	0.0708	3550.7	0.0953
ANAC038(NAC)/col-ANAC038-DAP-Seq(GSE60143)/Homer	ACACGTWAYC	1	0	1	5120	0.5219	21633.4	0.5808
ANAC045(NAC)/col-ANAC045-DAP-Seq(GSE60143)/Homer	DNCKTVNNNNNNAMG	1	0	1	3516	0.3584	15107.9	0.4056
ANAC046(NAC)/colamp-ANAC046-DAP-Seq(GSE60143)/Homer	ACACGYWAYC	1	0	1	4868	0.4962	20742.2	0.5569
ANAC070(NAC)/colamp-ANAC070-DAP-Seq(GSE60143)/Homer	CTTRHDNHNBAAGHW	1	0	1	3230	0.3293	14129.7	0.3793
ANAC103(NAC)/col-ANAC103-DAP-Seq(GSE60143)/Homer	AACTTGNWNWNCAAG	1	0	1	857	0.0874	4274.4	0.1148
At1g25550(G2like)/colamp-At1g25550-DAP-Seq(GSE60143)/Homer	NAGATTCY	1	0	1	3071	0.313	13375.5	0.3591
At1g49010(MYBrelated)/col-At1g49010-DAP-Seq(GSE60143)/Homer	RGATAASNTT	1	0	1	4950	0.5046	21106.4	0.5666
AT1G49560(G2like)/colamp-AT1G49560-DAP-Seq(GSE60143)/Homer	GAWTCTNWDA	1	0	1	4131	0.4211	17760.5	0.4768
At2g01060(G2like)/colamp-At2g01060-DAP-Seq(GSE60143)/Homer	AGATKCBNWW	1	0	1	7101	0.7239	30433.5	0.817
AT2G15740(C2H2)/col-AT2G15740-DAP-Seq(GSE60143)/Homer	DHNDWATCGATD	1	0	1	5950	0.6065	24871.7	0.6677
AT2G20110(CPP)/colamp-AT2G20110-DAP-Seq(GSE60143)/Homer	ATTYAAATHY	1	0	1	5392	0.5496	23367.9	0.6274
AT2G38300(G2like)/col-AT2G38300-DAP-Seq(GSE60143)/Homer	ADRGAATGTT	1	0	1	4388	0.4473	18302.8	0.4914
AT2G40260(G2like)/colamp-AT2G40260-DAP-Seq(GSE60143)/Homer	WAAAYATTCTTT	1	0	1	5148	0.5248	21997.7	0.5906
At3g04030(G2like)/col-At3g04030-DAP-Seq(GSE60143)/Homer	DRGAATCT	1	0	1	3046	0.3105	13320.8	0.3576
At3g12730(G2like)/colamp-At3g12730-DAP-Seq(GSE60143)/Homer	AAGATTCT	1	0	1	4635	0.4725	19669	0.5281
At3g24120(G2like)/col-At3g24120-DAP-Seq(GSE60143)/Homer	NWWAGMATMW	1	0	1	6625	0.6753	28338.3	0.7608
AT3G25990(Trihelix)/colamp-AT3G25990-DAP-Seq(GSE60143)/Homer	TTAACCATAG	1	0	1	2331	0.2376	10475.3	0.2812
At3g60580(C2H2)/col-At3g60580-DAP-Seq(GSE60143)/Homer	WTTYTACT	1	0	1	7880	0.8033	32237.4	0.8655
AT4G37180(G2like)/col-AT4G37180-DAP-Seq(GSE60143)/Homer	AGAATCTTNN	1	0	1	3770	0.3843	16493.2	0.4428
At5g04390(C2H2)/col200-At5g04390-DAP-Seq(GSE60143)/Homer	AGTGANDN	1	0	1	7742	0.7892	31233.3	0.8385
AT5G25475(ABI3VP1)/col-AT5G25475-DAP-Seq(GSE60143)/Homer	RNNRNCAAGCADNDB	1	0	1	1425	0.1453	6968.7	0.1871
AT5G45580(G2like)/colamp-AT5G45580-DAP-Seq(GSE60143)/Homer	ADRGAATCTH	1	0	1	4918	0.5013	20837.5	0.5594
AT5G47660(Trihelix)/colamp-AT5G47660-DAP-Seq(GSE60143)/Homer	AWTTTTACCG	1	0	1	4712	0.4803	20258.1	0.5439
At5g58900(MYBrelated)/colamp-At5g58900-DAP-Seq(GSE60143)/Homer	WWWTYTTATCTWWWW	1	0	1	5374	0.5478	22543	0.6052
ATY13(MYB)/col-ATY13-DAP-Seq(GSE60143)/Homer	YYYAACYRHH	1	0	1	6744	0.6875	27049.1	0.7262
CRC(C2C2YABBY)/col-CRC-DAP-Seq(GSE60143)/Homer	TWATSATA	1	0	1	4938	0.5034	21534.8	0.5781
DEL1(E2FDP)/colamp-DEL1-DAP-Seq(GSE60143)/Homer	TTCCCGCCAA	1	0	1	17	0.0017	403.9	0.0108
GATA15(C2C2gata)/col-GATA15-DAP-Seq(GSE60143)/Homer	KATGATCA	1	0	1	3744	0.3817	17386.7	0.4668
GATA20(C2C2gata)/colamp-GATA20-DAP-Seq(GSE60143)/Homer	TNGATCNDNM	1	0	1	5301	0.5404	23544.8	0.6321
GT2(Trihelix)/colamp-GT2-DAP-Seq(GSE60143)/Homer	AMGGTAAAWWWN	1	0	1	4090	0.4169	17643.9	0.4737
GTL1(Trihelix)/colamp-GTL1-DAP-Seq(GSE60143)/Homer	WWTTTACCKY	1	0	1	3775	0.3848	16281.6	0.4371
HSF3(HSF)/colamp-HSF3-DAP-Seq(GSE60143)/Homer	NTTCTAGAAKCTTCT	1	0	1	2289	0.2333	10814.4	0.2903
JGL(C2H2)/col-JGL-DAP-Seq(GSE60143)/Homer	ACYTTCAGTT	1	0	1	3307	0.3371	15477.2	0.4155
LHY(Myb)/Seedling-LHY-ChIP-Seq(GSE52175)/Homer	ADAAATATCT	1	0	1	3580	0.3649	15159.2	0.407
MYB101(MYB)/colamp-MYB101-DAP-Seq(GSE60143)/Homer	TAACNRMY	1	0	1	5201	0.5302	21307.2	0.572
MYB33(MYB)/col-MYB33-DAP-Seq(GSE60143)/Homer	DDTYNGTTAN	1	0	1	6165	0.6284	25036.9	0.6722
MYB70(MYB)/col-MYB70-DAP-Seq(GSE60143)/Homer	WTAACNGTTA	1	0	1	4798	0.4891	20184.9	0.5419
MYB73(MYB)/col-MYB73-DAP-Seq(GSE60143)/Homer	NNNNHAACNGHHDHN	1	0	1	5850	0.5963	24348	0.6537
MYB81(MYB)/col-MYB81-DAP-Seq(GSE60143)/Homer	NWAACSGWTWNN	1	0	1	5151	0.5251	21873.5	0.5872
NGA4(ABI3VP1)/col-NGA4-DAP-Seq(GSE60143)/Homer	TKNTCAGGTG	1	0	1	1797	0.1832	9150.1	0.2457
NST1(NAC)/colamp-NST1-DAP-Seq(GSE60143)/Homer	WRCTTRWWNWWYAAG	1	0	1	2593	0.2643	11357.7	0.3049
REM16(ABI3VP1)/col-REM16-DAP-Seq(GSE60143)/Homer	DTTTTTSCCGSMAAA	1	0	1	22	0.0022	432.7	0.0116
SOL1(CPP)/colamp-SOL1-DAP-Seq(GSE60143)/Homer	ATTTAAATHN	1	0	1	5576	0.5684	23886	0.6413
STZ(C2H2)/colamp-STZ-DAP-Seq(GSE60143)/Homer	HNBTCACT	1	0	1	7543	0.7689	30697.6	0.8241
TCX2(CPP)/colamp-TCX2-DAP-Seq(GSE60143)/Homer	NNWWTTYRAAHN	1	0	1	5626	0.5735	24226.9	0.6504
WIP5(C2H2)/colamp-WIP5-DAP-Seq(GSE60143)/Homer	TDTTCTCMAGGT	1	0	1	1038	0.1058	5575.8	0.1497
PHA-4(Forkhead)/cElegans-Embryos-PHA4-ChIP-Seq(modEncode)/Homer	KTGTTTGC	1	0	1	6923	0.7057	27691.7	0.7434
