# Supplementary material for: A CRC–MYB-mediated local chromatin loop at the MAB4 locus determines auxin-mediated nectary size in Arabidopsis thaliana
Source: Research Square preprint supplement (doi:10.21203/rs.3.rs-7421252/v1), 2025-09-07
Supplement: Supplementary file 9 [file 9e29091bd0b8bb8e5b9981c7.xlsx]

## Sheet: Sheet1
Supplementary Data 5. GO term analysis of CRC-regulated target genes.
CRC ChIP-seq (8825)				CRC targets at St12 (135)				CRC targets at St12 (135)
GO:MF		stats		GO:MF		stats		GO:MF		stats
Term name	Term ID	Padj		Term name	Term ID	Padj		Term name	Term ID	Padj
symporter activity	GO:0015293	1.588×10-5		structural constituent of chromatin	GO: 0030527	1.100x10-4		DNA-binding transcription factor activity	GO:0003700	1.836x10-3
secondary active transmembrane transporter activ...	GO:0015291	6.477×10-5		protein dimerization activity	GO: 0046983	4.910x10-4		carbohydrate transmembrane transporter activity	GO:0015144	4.279×10-3
oxidoreductase activity	GO:0016491	2.566×10-4		protein heterodimerization activity	GO:0046982	2.076x10-3		transcription regulator activity	GO:0140110	5.647×10-3
sucrose transmembrane transporter activity	GO:0008515	2.238×10-3		(+) -alpha-barbatene synthase activity	GO:0102878	8.379x10-3		esculetin 4-O-beta-glucosyltransferase activity	GO:0102361	1.666x10-2
disaccharide transmembrane transporter activity	GO:0015154	2.997×10-3		(+)-thujopsene synthase activity	GO:0102879	8.379×10-3		daphnetin 4-O-beta-glucosyltransferase activity	GO:0102359	1.666x10-2
oligosaccharide transmembrane transporter activity	GO:0015157	2.997×10-3		DNA binding	GO:0003677	1.241x10-2		symporter activity	GO:0015293	2.163×10-2
lyase activity	GO: 0016829	5.327×10-3		ether hydrolase activity	GO:0016803	2.505×10-2		carbohydrate:monoatomic cation symporter activity	GO:0005402	2.425×10-2
carbohydrate transmembrane transporter activity	GO:0015144	6.706×10-3		hydrolase activity, acting on ether bonds	GO:0016801	2.505x10-2		carbohydrate:proton symporter activity	GO:0005351	2.425x10-2
catalytic activity	GO:0003824	7.889×10-3		epoxide hydrolase activity	GO:0004301	2.505x10-2		sequence-specific DNA binding	GO: 0043565	4.112x10-2
transcription regulatory region nucleic acid binding	GO:0001067	2.731×10-2		linoleic acid epoxygenase activity	GO:0071614	2.505x10-2		glucosyltransferase activity	GO:0046527	4.760x10-2
transcription cis-regulatory region binding	GO: 0000976	2.731×10-2						transcription regulatory region nucleic acid binding	GO:0001067	4.954x10-2
sequence-specific double-stranded DNA binding	GO:1990837	3.374×10-2						transcription cis-regulatory region binding	GO:0000976	4 954x10-2
active transmembrane transporter activity	GO:0022804	4.561×10-2						UDP-glucose:sinapaldehyde 4-beta-D-glucosyltra...	GO:0102956	4.975x10-2
DNA-binding transcription factor activity	GO:0003700	4.812×10-2						UDP-glucose:coniferaldehyde 4-beta-D-glucosyltr...	GO:0102952	4.975×10-2
								coniferyl-alcohol glucosyltransferase activity	GO:0047209	4.975x10-2
GO:BP		stats		GO:BP		stats		GO:BP		stats
Term name	Term ID	Padj		Term name	Term ID	Padj		Term name	Term ID	Padj
response to chemical	GO:0042221	1.414x10-21		cutin biosynthetic process	GO:0010143	1.357×10-3		response to chemical	GO:0042221	3.972x10-13
response to stimulus	GO:0050896	7.844×10-18		cutin-based cuticle development	GO:0160062	1.357x10-3		racnanca in ctimilliic	GO:0050896	6.044x10-9
glycosinolate biosynthetic process	GO:0019758	5.777x10-14		anatomical structure development	GO:0048856	1.693×10-2		rechance to hormone	GO:0009725	5.553×10-8
glucosinolate biosynthetic process	GO:0019761	5.777×10-14		carpel development	GO:0048440	2.276x10-2		response to endogenous stimulus	GO:0009719	9.180x10-8
S-glycoside biosynthetic process	GO:0016144	5.777x10-14		developmental process	GO:0032502	2.964x10-2		response to organic substance	GO:0010033	9.541x10-8
glycosyl compound biosynthetic process	GO:1901659	8.652x10-14		plant organ development	GO: 0099402	3.699×10-2		cellular response to chemical stimulus	GO:0070887	1.580x10-7
cellular response to hypoxia	GO:0071456	3.946x10-12		gynoecium development	GO:0048467	4.915x10-2		cellular response to hypoxia	GO:0071456	3.215x10-6
cellular response to oxygen levels	GO:0071453	4.858x10-12						cellular response to decreased oxygen levels	GO:0036294	3.579x10-6
cellular response to decreased oxygen levels	GO:0036294	4.858×10-12						cellular response to oxygen levels	GO:0071453	3.579x10-6
secondary metabolite biosynthetic process	GO:0044550	5.249x10-12						response to lipid	GO:0033993	9.688x10-6
glycosinolate metabolic process	GO:0019757	6.591x10-12						response to hypoxia	GO:0001666	1.259×10-5
glucosinolate metabolic process	GO:0019760	6.591x10-12						response to decreased oxygen levels	GO:0036293	1.520×10-5
S-glycoside metabolic process	GO:0016143	6.591x10-12						response to oxygen levels	GO:0070482	1.592×10-5
glycosyl compound metabolic process	GO:1901657	2.077x10-11						cellular response to stimulus	GO:0051716	1.171×10-4
response to hypoxia	GO:0001666	5.539x10-11						response to oxygen-containing compound	GO:1901700	2.270×10-4
response to decreased oxygen levels	GO:0036293	7.966x10-11						response to abiotic stimulus	GO:0009628	2.622×10-4
response to oxygen levels	GO:0070482	8.714×10-11						response to abscisic acid	GO:0009737	6.305×10-4
response to stress	GO:0006950	1.347×10-10						response to alcohol	GO:0097305	7.792×10-4
sulfur compound biosynthetic process	GO:0044272	2982x10-10						long-chain fatty acid metabolic process	GO:0001676	1.958×10-3
cellular response to chemical stimulus	GO:0070887	3.000×10-10						oxoacid metabolic process	GO:0043436	4.115×10-3
secondary metabolic process	GO:0019748	3.246x10-10						organic acid metabolic process	GO:0006082	4.179×10-3
response to hormone	GO:0009725	4.358x10-9						hormone-mediated signaling pathway	GO:0009755	5.207×10-3
oxoacid metabolic process	GO:0043436	8.494x10-9						response to stress	GO:0006950	5.227×10-3
organic acid metabolic process	GO:0006082	8.791x10-9						cellular response to stress	GO:0033554	5.337×10-3
response to endogenous stimulus	GO:0009719	9.267×10-9						carboxylic acid metabolic process	GO:0019752	8.443x10-3
sulfur compound metabolic process	GO:0006790	9.697x10-9						cellular response to hormone stimulus	GO:0032870	1.333×10-2
response to ordanic substance	GO:0010033	2.400x10-8						regulation of cellular process	GO:0050794	1.660×10-2
response to abiotic stimulus	GO:0009628	9.099x10-8						cellular response to endogenous stimulus	GO:0071495	2.014×10-2
cellular response to stimulus	GO:0051716	7.125x10-7						regulation of biological process	GO:0050789	3.885×10-2
response to lipid	GO:0033993	7.628x10-7						small molecule biosynthetic process	GO:0044283	4.856×10-2
small molecule metabolic process	GO:0044281	2.583×10-6						regulation of RNA metabolic process	GO: 0051252	4.860×10-2
cellular response to stress	GO:0033554	4.291x10-6
response to oxygen-containing compound	GO:1901700	4.873×10-6
response to wounding	GO:0009611	2.251x10-5
carboxylic acid metabolic process	GO:0019752	2.364x10-5
response to jasmonic acid	GO:0009753	2861x10-4
response to fatty acid	GO:0070542	3.644x10-4
response to oxidative stress	GO:0006979	6.386x10-4
response to abscisic acid	GO:0009737	3.035x10-3
small molecule biosynthetic process	GO:0044283	3.214x10-3
resconse to alcohol	GO:0097305	3.978×10-3
carboxylic acid biosynthetic process	GO:0046394	4.910×10-3
organic acid biosynthetic process	GO:0016053	4.910x10-3
response to toxic substance	GO:0009636	5.139×10-3
amino acid metabolic process	GO:0006520	7,250x10-3
developmental process	GO:0032502	8.506x10-3
anatomical structure development	GO:0048856	9.609x10-3
alpha-amino acid metabolic process	GO:1901605	1.275x10-2
detoxification	GO:0098754	1.279x10-2
disaccharide metabolic process	GO:0005984	1,426x10-2
response to inorganic substance	GO:0010035	1.429x10-2
long-chain fatty acid metabolic process	GO:0001676	1.555×10-2
sucrose transport	GO:0015770	1.944×10-2
disaccharide transport	GO:0015766	2.450x10-2
oligosaccharide transport	GO:0015772	2.450x10-2
oligosaccharide metabolic process	GO:0009311	2.906x10-2
multicellular organismal process	GO:0032501	3820x10-2
response to insect	GO:0009625	4,220x10-2
sucrose metabolic process	GO:0005985	4.854×10-2
