# Supplementary material for: A CRC–MYB-mediated local chromatin loop at the MAB4 locus determines auxin-mediated nectary size in Arabidopsis thaliana
Source: Research Square preprint supplement (doi:10.21203/rs.3.rs-7421252/v1), 2025-09-07
Supplement: Supplementary file 10 [file b008b5f1bb83db74c6e9c54f.xlsx]

## Sheet: Sheet1
Supplementary Data 6. Results of MYB57-GFP ChIP experiments.
Region	Gene.symbol	Gene.ID	Gene.chrom	Gene.start	Gene.end	Gene.strand	Gene.distance	Gene.section
1_2387_3182	NAC001	AT1G01010	1	3631	5899	+	449	Promoter
1_8669_8914	ARV1	AT1G01020	1	6788	9130	-	216	Intronexonboundary
1_13589_13888	NGA3	AT1G01030	1	11649	13714	-	125	Promoter
1_14822_15245	NGA3	AT1G01030	1	11649	13714	-	1108	1to5kb
1_20606_21584	DCL1	AT1G01040	1	23121	31227	+	1537	1to5kb
1_33233_33901	PPa1	AT1G01050	1	31170	33171	-	62	Promoter
1_37705_38572	UMAMIT28	AT1G01070	1	38444	41017	-	2445	3UTR
1_46880_47429	AT1G01080	AT1G01080	1	44970	47059	-	179	Promoter
1_48618_49465	PDH-E1 ALPHA	AT1G01090	1	47234	49304	-	161	Promoter
1_51162_51585	AT1G01100	AT1G01100	1	49909	51210	-	48	Promoter
1_54979_55718	IQD18	AT1G01110	1	51953	54737	+	3026	Intergenic
1_56567_57192	KCS1	AT1G01120	1	57164	59215	-	2023	3UTR
1_57432_57661	KCS1	AT1G01120	1	57164	59215	-	1554	Exon
1_58749_59436	KCS1	AT1G01120	1	57164	59215	-	221	Promoter
1_60506_60852	AT1G01130	AT1G01130	1	61905	63811	-	2959	Intergenic
1_61880_62270	AT1G01130	AT1G01130	1	61905	63811	-	1541	Intronexonboundary
1_63812_64124	AT1G01130	AT1G01130	1	61905	63811	-	1	Promoter
1_67543_67876	CIPK9	AT1G01140	1	64166	67774	-	102	Promoter
1_68493_69252	AT1G01150	AT1G01150	1	69911	72138	-	2886	Intergenic
1_72138_72414	AT1G01150	AT1G01150	1	69911	72138	-	0	Promoter
1_76218_76470	AT1G01180	AT1G01180	1	75390	76845	+	828	Intronexonboundary
1_76788_77933	AT1G01180	AT1G01180	1	75390	76845	+	1398	Intron
1_82982_83339	CYP78A8	AT1G01190	1	82984	84946	-	1607	3UTR
1_88260_88961	RABA3	AT1G01200	1	86486	88409	-	149	Promoter
1_91233_91678	FKGP	AT1G01220	1	91342	95681	+	109	Promoter
1_95537_95997	AT1G01225	AT1G01225	1	95935	97407	+	62	Promoter
1_97255_97493	AT1G01230	AT1G01230	1	97412	99240	+	81	Promoter
1_99150_100050	AT1G01230	AT1G01230	1	97412	99240	+	1738	3UTR
1_101804_102173	AT1G01240	AT1G01240	1	99865	101987	+	1939	3UTR
1_102668_102967	AT1G01240	AT1G01240	1	99865	101987	+	2803	Intergenic
1_103647_104126	AT1G01250	AT1G01250	1	104440	105330	-	1204	Intergenic
1_107538_107800	AT1G01260	AT1G01260	1	108946	111699	+	1146	1to5kb
1_108076_109300	AT1G01260	AT1G01260	1	108946	111699	+	354	Promoter
1_112275_113120	CYP703A2	AT1G01280	1	112263	113947	+	12	Intronexonboundary
1_115891_116293	CNX3	AT1G01290	1	114202	116407	+	1689	3UTR
1_117224_119111	AT1G01300	AT1G01300	1	116784	118845	+	440	3UTR
1_120436_121115	AT1G01310	AT1G01310	1	120154	121130	+	282	3UTR
1_128865_129176	AT1G01320	AT1G01320	1	121067	130577	-	1401	Intronexonboundary
1_130695_131257	AT1G01335	AT1G01335	1	130736	130858	+	41	Promoter
1_140187_140415	AT1G01355	AT1G01355	1	138489	139680	+	1698	Intergenic
1_141777_142135	RCAR1	AT1G01360	1	141870	143261	+	93	Promoter
1_146176_146459	HTR12	AT1G01370	1	143489	146479	+	2687	Intronexonboundary
1_155905_157015	UGT72B3	AT1G01420	1	154367	156178	-	273	Promoter
1_158626_159147	TBL25	AT1G01430	1	156477	158823	-	197	Promoter
1_159479_159846	AT1G01440	AT1G01440	1	159628	162953	-	3107	3UTR
1_162568_163461	AT1G01440	AT1G01440	1	159628	162953	-	385	Promoter
1_173249_173665	LEA14	AT1G01470	1	171525	172948	-	301	Promoter
1_176995_177237	ACS2	AT1G01480	1	175706	178406	+	1289	Intronexonboundary
1_179243_179723	AT1G01490	AT1G01490	1	180017	182749	-	3026	Intergenic
1_182292_182741	AT1G01490	AT1G01490	1	180017	182749	-	8	5UTR
1_183087_183843	AT1G01490	AT1G01490	1	180017	182749	-	338	Promoter
1_184356_185285	AT1G01500	AT1G01500	1	185033	187135	+	252	Promoter
1_194566_195140	AT1G01540	AT1G01540	1	195645	198787	+	505	Promoter
1_195469_195946	AT1G01540	AT1G01540	1	195645	198787	+	176	Promoter
1_198485_198718	AT1G01540	AT1G01540	1	195645	198787	+	2840	3UTR
1_199435_199843	BPS1	AT1G01550	1	199527	201775	+	92	Promoter
1_201262_201532	BPS1	AT1G01550	1	199527	201775	+	1735	Exon
1_204238_204670	MPK11	AT1G01560	1	202103	204440	+	2135	3UTR
1_205931_206172	AT1G01570	AT1G01570	1	204935	207642	+	996	Intronexonboundary
1_206624_207239	AT1G01570	AT1G01570	1	204935	207642	+	1689	Intronexonboundary
1_207629_208031	AT1G01570	AT1G01570	1	204935	207642	+	2694	3UTR
1_208810_209093	FRO2	AT1G01580	1	208995	213082	+	98	Promoter
1_210470_210806	FRO2	AT1G01580	1	208995	213082	+	1475	Intronexonboundary
1_216378_216753	FRO1	AT1G01590	1	214150	217734	+	2228	Intronexonboundary
1_218664_219299	CYP86A4	AT1G01600	1	218834	221286	+	170	Promoter
1_219609_220037	CYP86A4	AT1G01600	1	218834	221286	+	775	Intronexonboundary
1_220872_221430	CYP86A4	AT1G01600	1	218834	221286	+	2038	3UTR
1_225396_226643	PIP1C	AT1G01620	1	225665	227543	-	900	Intronexonboundary
1_226963_227247	PIP1C	AT1G01620	1	225665	227543	-	296	5UTR
1_228832_229253	AT1G01630	AT1G01630	1	228799	230979	+	33	Intronexonboundary
1_230150_230700	AT1G01640	AT1G01640	1	230908	232630	-	1930	Intergenic
1_232561_232812	SPPL4	AT1G01650	1	232840	237905	-	5093	Intergenic
1_237508_238075	SPPL4	AT1G01650	1	232840	237905	-	170	Promoter
1_239362_239997	AT1G01660	AT1G01660	1	239841	242703	-	2706	3UTR
1_245844_246216	PUB54	AT1G01680	1	246262	248440	-	2224	Intergenic
1_248694_249120	PRD3	AT1G01690	1	249041	252522	+	79	Promoter
1_254330_254699	TRM33	AT1G01695	1	252626	254530	+	1704	Intronexonboundary
1_262682_262936	AT1G01710	AT1G01710	1	262828	266324	+	108	Promoter
1_266057_266568	AT1G01715	AT1G01715	1	266333	267883	+	235	Promoter
1_269536_269915	ATAF1	AT1G01720	1	267993	269819	+	1543	3UTR
1_274699_275612	BSK4	AT1G01740	1	272111	274930	-	231	Promoter
1_282627_282928	AT1G01770	AT1G01770	1	278600	282891	+	4027	Intronexonboundary
1_291178_291467	KEA1	AT1G01790	1	284350	291203	+	6828	Intronexonboundary
1_295032_295303	AT1G01800	AT1G01800	1	293246	295086	+	1786	3UTR
1_298078_298828	PEX11C	AT1G01820	1	296001	298334	-	256	Promoter
1_300748_301109	AT1G01830	AT1G01830	1	298451	302310	-	1201	Intronexonboundary
1_302658_303751	AT1G01840	AT1G01840	1	303537	304358	+	214	Promoter
1_308697_309992	SBTI1.1	AT1G01900	1	310169	313130	+	177	Promoter
1_324840_325475	AT1G01940	AT1G01940	1	322886	324917	+	1954	3UTR
1_338092_338349	AT1G01970	AT1G01970	1	338241	340088	+	108	Promoter
1_342328_342871	AT1G01990	AT1G01990	1	342918	344400	-	1529	Intergenic
1_356465_357027	AT1G02030	AT1G02030	1	355124	357258	-	231	5UTR
1_362974_364996	AT1G02060	AT1G02060	1	360918	363142	-	168	Promoter
1_366196_366707	AT1G02067	AT1G02067	1	366945	367166	-	459	Intergenic
1_367349_368937	SPL8	AT1G02065	1	365165	367443	+	2184	3UTR
1_369444_370081	AT1G02070	AT1G02070	1	370195	371090	-	1009	Intergenic
1_370692_371278	AT1G02070	AT1G02070	1	370195	371090	-	188	Promoter
1_371772_372400	AT1G02070	AT1G02070	1	370195	371090	-	682	Promoter
1_373272_373542	AT1G02080	AT1G02080	1	373335	386913	+	63	Promoter
1_386768_387088	AT1G02080	AT1G02080	1	373335	386913	+	13433	3UTR
1_389517_389955	SBI1	AT1G02100	1	389812	392816	+	143	Promoter
1_392433_393128	AT1G02110	AT1G02110	1	392831	395528	+	297	Promoter
1_395454_395849	AT1G02110	AT1G02110	1	392831	395528	+	2623	3UTR
1_401855_402824	RA-5	AT1G02130	1	399983	401919	-	64	Promoter
1_403177_403766	MAGO	AT1G02140	1	403100	404456	-	690	Intronexonboundary
1_404350_404757	MAGO	AT1G02140	1	403100	404456	-	106	Promoter
1_410558_410839	AT1G02160	AT1G02160	1	410744	411632	+	95	Promoter
1_411583_412029	AT1G02160	AT1G02160	1	410744	411632	+	839	3UTR
1_413688_414118	MC1	AT1G02170	1	411664	413554	+	2024	Intergenic
1_414514_414976	AT1G02190	AT1G02190	1	415074	418027	+	98	Promoter
1_417775_418834	AT1G02190	AT1G02190	1	415074	418027	+	2701	3UTR
1_430992_431348	NAC003	AT1G02220	1	428650	430720	-	272	Promoter
1_436785_437395	NAC004	AT1G02230	1	434965	436922	-	137	Promoter
1_461440_461949	AT1G02330	AT1G02330	1	461946	463618	-	1669	3UTR
1_467639_468061	HFR1	AT1G02340	1	465616	467880	-	181	Promoter
1_468648_470222	AT1G02350	AT1G02350	1	469818	470693	+	404	Promoter
1_471464_472340	AT1G02360	AT1G02360	1	471883	473336	-	996	3UTR
1_476572_477224	AT1G02370	AT1G02370	1	474373	476612	+	2199	3UTR
1_483798_484196	GPAT2	AT1G02390	1	480650	483373	+	3148	Intergenic
1_485581_485960	GA2OX6	AT1G02400	1	486800	489651	+	840	Promoter
1_487708_488079	GA2OX6	AT1G02400	1	486800	489651	+	908	Intron
1_488581_488952	GA2OX6	AT1G02400	1	486800	489651	+	1781	Intronexonboundary
1_490613_491353	AT1G02405	AT1G02405	1	489874	490627	-	14	Promoter
1_493041_493651	AT1G02420	AT1G02420	1	493639	495158	+	12	Promoter
1_501334_501736	AT1G02460	AT1G02460	1	504463	507268	-	5532	Intergenic
1_512316_512597	AT1G02470	AT1G02470	1	511765	513721	-	1124	Intronexonboundary
1_513562_514608	AT1G02475	AT1G02475	1	513699	515422	-	814	Intronexonboundary
1_515454_515716	AT1G02475	AT1G02475	1	513699	515422	-	32	Promoter
1_521844_522184	TPK4	AT1G02510	1	520498	521668	-	176	Promoter
1_537574_537967	CLPP5	AT1G02560	1	537740	540127	+	166	Promoter
1_552581_552890	AT1G02590	AT1G02590	1	552138	552761	-	129	Promoter
1_553760_554323	AT1G02610	AT1G02610	1	553019	556152	-	1829	Intronexonboundary
1_554983_555444	AT1G02610	AT1G02610	1	553019	556152	-	708	Intronexonboundary
1_555730_556078	AT1G02610	AT1G02610	1	553019	556152	-	74	Intronexonboundary
1_556531_557177	AT1G02620	AT1G02620	1	557092	558774	+	85	Promoter
1_565341_566299	BXL2	AT1G02640	1	564018	567771	+	1323	Intronexonboundary
1_566650_567056	BXL2	AT1G02640	1	564018	567771	+	2632	Exon
1_570870_571615	AT1G02660	AT1G02660	1	571826	575085	-	3470	Intergenic
1_574870_575104	AT1G02660	AT1G02660	1	571826	575085	-	19	Promoter
1_576279_576586	AT1G02670	AT1G02670	1	575922	580532	+	357	Intronexonboundary
1_591619_591956	GATL5	AT1G02720	1	591682	594264	+	63	Promoter
1_602143_602588	AT1G02740	AT1G02740	1	599330	602199	-	56	Promoter
1_607779_608058	emb2386	AT1G02780	1	607799	609534	-	1476	Intronexonboundary
1_610643_611054	PGA4	AT1G02790	1	610363	612324	-	1270	Intronexonboundary
1_616119_617091	CEL2	AT1G02800	1	613197	616231	-	112	Promoter
1_621040_621608	AT1G02816	AT1G02816	1	621453	623054	+	155	Promoter
1_625649_625891	AT1G02830	AT1G02830	1	625084	625608	-	41	Promoter
1_635007_635336	NLA	AT1G02860	1	635144	637262	+	137	Promoter
1_644567_644880	TPK1	AT1G02880	1	642505	644903	-	23	Intronexonboundary
1_652314_652745	AT1G02890	AT1G02890	1	645084	652001	-	313	Promoter
1_653253_653746	RALF1	AT1G02900	1	653604	654457	-	711	3UTR
1_658074_658320	LPA1	AT1G02910	1	655568	658216	-	104	Promoter
1_658633_658885	GSTF7	AT1G02920	1	658578	659980	-	1095	3UTR
1_669671_669981	AT1G02960	AT1G02960	1	666807	669919	-	62	Promoter
1_687082_687702	PEX6	AT1G03000	1	687795	692660	-	4958	Intergenic
1_701281_701524	AT1G03030	AT1G03030	1	701365	703929	+	84	Promoter
1_704523_704876	AT1G03030	AT1G03030	1	701365	703929	+	3158	Intergenic
1_706532_706834	AT1G03040	AT1G03040	1	703847	706689	-	145	Promoter
1_707192_707434	AT1G03050	AT1G03050	1	707485	710041	+	51	Promoter
1_727142_727688	SPI	AT1G03060	1	712440	727553	-	135	Promoter
1_737940_738664	NET1D	AT1G03080	1	731554	738306	-	358	Promoter
1_738954_739645	MCCA	AT1G03090	1	739544	744184	+	101	Promoter
1_749081_749313	AT1G03106	AT1G03106	1	748101	749034	-	47	Promoter
1_751576_752128	RAB28	AT1G03120	1	752191	753140	+	63	Promoter
1_772616_773555	AT1G03180	AT1G03180	1	773358	775362	+	197	Promoter
1_780068_780565	UVH6	AT1G03190	1	775527	780062	+	4541	Intronexonboundary
1_785529_785881	AT1G03220	AT1G03220	1	786832	788722	+	951	Promoter
1_798314_799432	AT1G03260	AT1G03260	1	795449	798491	-	177	Promoter
1_813032_813437	DBE1	AT1G03310	1	813413	816812	+	24	Promoter
1_824280_824641	RRP4	AT1G03360	1	824517	826399	+	124	Promoter
1_830413_830927	AT1G03365	AT1G03365	1	826523	830393	+	3890	Intergenic
1_835471_835871	AT1G03370	AT1G03370	1	830550	835411	+	4921	Intergenic
1_845891_846175	2A6	AT1G03410	1	844436	847683	-	1508	Exon
1_847038_847673	2A6	AT1G03410	1	844436	847683	-	10	5UTR
1_849491_849927	AHP5	AT1G03430	1	847793	849621	+	1698	3UTR
1_850655_850918	AHP5	AT1G03430	1	847793	849621	+	2862	Intergenic
1_851714_851990	AT1G03440	AT1G03440	1	852151	854297	+	161	Promoter
1_853709_854075	AT1G03440	AT1G03440	1	852151	854297	+	1558	3UTR
1_863277_864487	AT1G03457	AT1G03457	1	860761	864372	-	115	Promoter
1_868166_869023	LIN2	AT1G03475	1	868853	871308	-	2285	3UTR
1_877572_878261	AT1G03510	AT1G03510	1	876087	877556	-	16	Promoter
1_879697_880881	NAF1	AT1G03530	1	880384	883599	-	2718	3UTR
1_892444_892864	AT1G03560	AT1G03560	1	890155	892492	-	48	Promoter
1_897352_898684	PSB27	AT1G03600	1	898480	899794	+	204	Promoter
1_898914_899338	PSB27	AT1G03600	1	898480	899794	+	434	5UTR
1_899830_901287	PSB27	AT1G03600	1	898480	899794	+	1350	Intergenic
1_902816_903062	AT1G03610	AT1G03610	1	900732	903070	+	2084	3UTR
1_903380_903974	AT1G03620	AT1G03620	1	904032	907643	-	3669	Intergenic
1_907198_907602	AT1G03620	AT1G03620	1	904032	907643	-	41	Intronexonboundary
1_918020_918323	AT1G03687	AT1G03687	1	918285	920592	+	38	Promoter
1_928852_929411	AT1G03730	AT1G03730	1	930715	931985	-	2574	Intergenic
1_930493_930912	AT1G03730	AT1G03730	1	930715	931985	-	1073	3UTR
1_931191_932296	AT1G03730	AT1G03730	1	930715	931985	-	311	Promoter
1_933927_934186	AT1G03740	AT1G03740	1	933426	937152	+	501	5UTR
1_937511_937896	SWI2	AT1G03750	1	937826	941162	+	70	Promoter
1_981822_982049	PHB2	AT1G03860	1	979307	982002	-	47	Promoter
1_984008_984703	FLA9	AT1G03870	1	982381	983544	-	464	Promoter
1_992862_993634	ABCI19	AT1G03905	1	993400	995989	+	234	Promoter
1_1000577_1000859	AT1G03910	AT1G03910	1	996076	1000629	+	4501	3UTR
1_1004606_1005124	ADK1	AT1G03930	1	1004688	1008370	+	82	Promoter
1_1023695_1024287	AT1G03982	AT1G03982	1	1022251	1023719	-	24	Promoter
1_1028216_1029230	AT1G04000	AT1G04000	1	1027853	1029119	-	111	Promoter
1_1031277_1031539	PSAT1	AT1G04010	1	1030957	1036264	-	4725	Intronexonboundary
1_1036032_1036284	PSAT1	AT1G04010	1	1030957	1036264	-	20	Promoter
1_1049305_1050102	SUVR1	AT1G04050	1	1045598	1049864	-	238	Promoter
1_1050954_1051351	PRP39	AT1G04080	1	1051312	1056827	+	39	Promoter
1_1059359_1059679	AT1G04105	AT1G04105	1	1059730	1060348	-	669	Intergenic
1_1072553_1073296	TPR2	AT1G04130	1	1073274	1075568	+	22	Promoter
1_1075485_1075792	AT1G04140	AT1G04140	1	1075543	1080630	-	4838	3UTR
1_1085640_1086363	XIB	AT1G04160	1	1086170	1096510	+	193	Promoter
1_1096205_1097095	EIF2 GAMMA	AT1G04170	1	1096882	1099901	+	213	Promoter
1_1106139_1106420	TPR3	AT1G04190	1	1106354	1108725	-	2305	3UTR
1_1108731_1109798	TPR3	AT1G04190	1	1106354	1108725	-	6	Promoter
1_1120462_1121058	AT1G04210	AT1G04210	1	1114375	1119739	+	6087	Intergenic
1_1124265_1124745	AT1G04230	AT1G04230	1	1125515	1128788	+	770	Promoter
1_1129400_1129765	SHY2	AT1G04240	1	1128149	1129689	-	76	Promoter
1_1130185_1130446	SHY2	AT1G04240	1	1128149	1129689	-	496	Promoter
1_1131856_1132104	SHY2	AT1G04240	1	1128149	1129689	-	2167	1to5kb
1_1141348_1141586	MPI7	AT1G04260	1	1140278	1141564	-	22	Promoter
1_1143626_1143963	AT1G04280	AT1G04280	1	1143436	1147091	-	3128	Intronexonboundary
1_1145500_1146399	AT1G04280	AT1G04280	1	1143436	1147091	-	692	Intronexonboundary
1_1148338_1148915	AT1G04290	AT1G04290	1	1147297	1148533	-	195	Promoter
1_1154505_1155203	AT1G04300	AT1G04300	1	1148564	1154667	-	162	Promoter
1_1157560_1157941	ERS2	AT1G04310	1	1154740	1157813	-	128	Promoter
1_1166990_1167586	AT1G04350	AT1G04350	1	1164910	1167135	+	2080	3UTR
1_1172691_1172959	ERF14	AT1G04370	1	1175033	1175768	+	2074	1to5kb
1_1174038_1174464	ERF14	AT1G04370	1	1175033	1175768	+	569	Promoter
1_1174921_1175314	ERF14	AT1G04370	1	1175033	1175768	+	112	Promoter
1_1183104_1183339	AT1G04390	AT1G04390	1	1179310	1183704	-	365	Intronexonboundary
1_1215903_1216143	AT1G04480	AT1G04480	1	1215925	1217471	+	22	Promoter
1_1226277_1226621	MAC3A	AT1G04510	1	1226483	1230947	+	138	Promoter
1_1235981_1236717	AT1G04540	AT1G04540	1	1236754	1239199	+	37	Promoter
1_1240020_1240494	IAA12	AT1G04550	1	1240294	1242157	+	200	Promoter
1_1244270_1244523	AT1G04555	AT1G04555	1	1242506	1244244	+	1764	Intergenic
1_1248910_1249318	AT1G04570	AT1G04570	1	1246601	1248876	-	34	Promoter
1_1261426_1261825	AT1G04590	AT1G04590	1	1258556	1261470	-	44	Promoter
1_1280855_1281593	YUC3	AT1G04610	1	1279351	1281618	+	1504	Intronexonboundary
1_1307713_1308450	AT1G04680	AT1G04680	1	1303467	1307973	-	260	Promoter
1_1309278_1309961	AT1G04680	AT1G04680	1	1303467	1307973	-	1305	1to5kb
1_1312875_1313635	KAB1	AT1G04690	1	1313443	1315823	+	192	Promoter
1_1333408_1333882	VAMP721	AT1G04750	1	1331466	1333651	-	231	Promoter
1_1337922_1338822	AT1G04770	AT1G04770	1	1336274	1337849	-	73	Promoter
1_1339538_1339974	AT1G04778	AT1G04778	1	1339588	1340565	+	50	Promoter
1_1340707_1340959	AT1G04778	AT1G04778	1	1339588	1340565	+	1119	Intergenic
1_1343732_1344130	AT1G04780	AT1G04780	1	1340553	1343793	-	61	Promoter
1_1344687_1345101	AT1G04790	AT1G04790	1	1344989	1348868	+	112	Promoter
1_1349879_1350113	AT1G04810	AT1G04810	1	1350080	1355466	+	33	Promoter
1_1355495_1355962	AT1G04810	AT1G04810	1	1350080	1355466	+	5415	Intergenic
1_1391325_1391636	AT1G04910	AT1G04910	1	1387871	1391381	-	56	Promoter
1_1398892_1399469	AT1G04930	AT1G04930	1	1396265	1399122	-	230	Promoter
1_1407458_1407962	TAFII59	AT1G04950	1	1403085	1407531	-	73	Promoter
1_1410823_1411168	AT1G04970	AT1G04970	1	1411088	1413627	+	80	Promoter
1_1418214_1419574	AT1G04990	AT1G04990	1	1418612	1421863	-	2289	Intronexonboundary
1_1421646_1421911	AT1G04990	AT1G04990	1	1418612	1421863	-	48	Promoter
1_1422257_1422905	AT1G04990	AT1G04990	1	1418612	1421863	-	394	Promoter
1_1423891_1424488	PFA-DSP1	AT1G05000	1	1425539	1428869	+	1051	1to5kb
1_1425219_1425502	PFA-DSP1	AT1G05000	1	1425539	1428869	+	37	Promoter
1_1433630_1433916	EFE	AT1G05010	1	1431177	1433010	-	620	Promoter
1_1455155_1455403	CLE20	AT1G05065	1	1454606	1455322	-	81	Promoter
1_1456664_1456908	AT1G05070	AT1G05070	1	1457007	1458802	-	1894	Intergenic
1_1468851_1470632	MAPKKK18	AT1G05100	1	1469541	1470881	+	690	Promoter
1_1470904_1471349	MAPKKK18	AT1G05100	1	1469541	1470881	+	1363	Intergenic
1_1478597_1478871	AT1G05136	AT1G05136	1	1478923	1479063	+	52	Promoter
1_1496203_1497052	AXR1	AT1G05180	1	1498114	1501953	-	4901	Intergenic
1_1497904_1498214	AXR1	AT1G05180	1	1498114	1501953	-	3739	3UTR
1_1519962_1520774	AT1G05240	AT1G05240	1	1520278	1523023	+	316	Promoter
1_1529618_1529863	RCI3	AT1G05260	1	1529767	1531484	+	96	Promoter
1_1545214_1545466	ZIP5	AT1G05300	1	1544927	1547849	-	2383	3UTR
1_1559137_1559543	AT1G05340	AT1G05340	1	1558778	1559917	-	374	Intronexonboundary
1_1563861_1564340	AT1G05350	AT1G05350	1	1560678	1564409	-	69	Intronexonboundary
1_1568815_1569113	AT1G05370	AT1G05370	1	1569147	1572469	-	3356	Intergenic
1_1569542_1569916	AT1G05370	AT1G05370	1	1569147	1572469	-	2553	Exon
1_1570468_1570864	AT1G05370	AT1G05370	1	1569147	1572469	-	1605	Intronexonboundary
1_1576417_1577026	AT1G05380	AT1G05380	1	1576822	1582672	+	204	Promoter
1_1582518_1582948	LPA19	AT1G05385	1	1582671	1583760	-	812	Intronexonboundary
1_1583503_1584145	AT1G05400	AT1G05400	1	1584073	1585421	+	72	Promoter
1_1587716_1587992	AT1G05410	AT1G05410	1	1585371	1587794	-	78	Promoter
1_1592489_1592766	AT1G05430	AT1G05430	1	1594053	1595923	-	3157	Intergenic
1_1599217_1599467	AT1G05450	AT1G05450	1	1599876	1601214	+	409	Promoter
1_1607435_1608001	CVP2	AT1G05470	1	1607202	1611840	-	3839	Intronexonboundary
1_1611586_1613290	CVP2	AT1G05470	1	1607202	1611840	-	254	Promoter
1_1617115_1617388	chr31	AT1G05490	1	1618504	1623489	-	6101	Intergenic
1_1623302_1623644	chr31	AT1G05490	1	1618504	1623489	-	155	Promoter
1_1693695_1694050	AT1G05660	AT1G05660	1	1694070	1696191	-	2141	Intergenic
1_1713311_1713763	AT1G05700	AT1G05700	1	1709673	1713474	+	3638	Intronexonboundary
1_1732405_1732858	AT1G05790	AT1G05790	1	1732802	1737583	+	56	Promoter
1_1744568_1744947	AT1G05805	AT1G05805	1	1744444	1747734	+	124	5UTR
1_1745571_1746114	AT1G05805	AT1G05805	1	1744444	1747734	+	1127	Intronexonboundary
1_1746481_1746710	AT1G05805	AT1G05805	1	1744444	1747734	+	2037	Intronexonboundary
1_1768531_1769007	AT1G05860	AT1G05860	1	1768986	1771286	+	21	Promoter
1_1779771_1780069	ARI5	AT1G05890	1	1779256	1784675	+	515	Intronexonboundary
1_1786567_1787083	NTH2	AT1G05900	1	1786849	1789737	+	234	Promoter
1_1790037_1790487	AT1G05910	AT1G05910	1	1790216	1796715	+	179	Promoter
1_1820168_1820508	AT1G06000	AT1G06000	1	1820308	1821894	-	1386	3UTR
1_1821591_1822478	AT1G06010	AT1G06010	1	1822583	1824236	+	105	Promoter
1_1829665_1830684	AT1G06045	AT1G06045	1	1829522	1829865	+	143	Intronexonboundary
1_1837653_1838302	AT1G06070	AT1G06070	1	1834829	1837758	-	105	Promoter
1_1854978_1855325	SKIP16	AT1G06110	1	1853059	1855378	-	53	5UTR
1_1864442_1864853	MEF3	AT1G06140	1	1864774	1866999	+	79	Promoter
1_1868680_1869049	EMB1444	AT1G06150	1	1868989	1873730	-	4681	3UTR
1_1873773_1874722	EMB1444	AT1G06150	1	1868989	1873730	-	43	Promoter
1_1876858_1878061	AT1G06148	AT1G06148	1	1874885	1877573	-	488	Promoter
1_1884653_1884901	AT1G06170	AT1G06170	1	1884981	1886904	-	2003	Intergenic
1_1887057_1887569	AT1G06170	AT1G06170	1	1884981	1886904	-	153	Promoter
1_1887849_1888546	MYB13	AT1G06180	1	1889362	1891276	+	816	Promoter
1_1896987_1897273	AT1G06200	AT1G06200	1	1894289	1897027	-	40	Promoter
1_1922006_1922278	ACX3	AT1G06290	1	1922208	1926278	+	70	Promoter
1_1932995_1933577	AT1G06340	AT1G06340	1	1933284	1934103	-	526	3UTR
1_1934097_1934602	AT1G06340	AT1G06340	1	1933284	1934103	-	6	Promoter
1_1942453_1942858	AT1G06360	AT1G06360	1	1938862	1940496	-	1957	1to5kb
1_1944774_1945121	AT1G06380	AT1G06380	1	1944993	1946303	+	128	Promoter
1_1946664_1946957	GSK1	AT1G06390	1	1946746	1950860	+	82	Promoter
1_1950528_1950796	GSK1	AT1G06390	1	1946746	1950860	+	3782	3UTR
1_1952635_1952904	ARA-2	AT1G06400	1	1950596	1952880	-	24	Promoter
1_1953537_1954041	TPS7	AT1G06410	1	1954674	1958866	+	633	Promoter
1_1954672_1954978	TPS7	AT1G06410	1	1954674	1958866	+	2	Promoter
1_1958611_1958955	AT1G06420	AT1G06420	1	1958878	1960027	+	77	Promoter
1_1963001_1963231	FTSH8	AT1G06430	1	1960031	1963189	-	42	Promoter
1_1969421_1969805	AT1G06470	AT1G06470	1	1969658	1974526	+	147	Promoter
1_1974287_1974918	AT1G06475	AT1G06475	1	1973834	1974407	-	120	Promoter
1_1977859_1978670	CalS7	AT1G06490	1	1978378	1989409	+	292	Promoter
1_1997315_1997989	GPAT1	AT1G06520	1	1993903	1996355	-	960	Promoter
1_1998390_1998690	GPAT1	AT1G06520	1	1993903	1996355	-	2035	1to5kb
1_2000759_2001043	PMD2	AT1G06530	1	2001382	2002802	+	339	Promoter
1_2006821_2007585	AT1G06560	AT1G06560	1	2007615	2012006	+	30	Promoter
1_2024699_2025591	AT1G06620	AT1G06620	1	2025544	2027413	+	47	Promoter
1_2040203_2040577	JASON	AT1G06660	1	2037311	2040419	-	158	Promoter
1_2051978_2052576	AT1G06690	AT1G06690	1	2049400	2052170	-	192	Promoter
1_2082757_2083377	GAUT6	AT1G06780	1	2083311	2087141	+	66	Promoter
1_2086656_2087201	AT1G06790	AT1G06790	1	2087182	2089786	+	19	Promoter
1_2089519_2090030	PLA-I{gamma}1	AT1G06800	1	2089417	2091686	-	1656	Intronexonboundary
1_2101931_2102249	AT1G06840	AT1G06840	1	2097747	2103507	-	1258	Intronexonboundary
1_2103393_2103677	AT1G06840	AT1G06840	1	2097747	2103507	-	114	Promoter
1_2103948_2104526	AT1G06840	AT1G06840	1	2097747	2103507	-	441	Promoter
1_2106448_2106853	bZIP52	AT1G06850	1	2105048	2106749	+	1400	Intronexonboundary
1_2107292_2107531	bZIP52	AT1G06850	1	2105048	2106749	+	2244	Intronexonboundary
1_2111188_2111762	AT1G06890	AT1G06890	1	2111323	2114686	-	2924	Intronexonboundary
1_2125996_2126522	OFP4	AT1G06920	1	2124676	2125902	-	94	Promoter
1_2128189_2128574	AT1G06925	AT1G06925	1	2127704	2128611	-	37	Intronexonboundary
1_2141881_2142127	AT1G06980	AT1G06980	1	2142939	2143977	-	1850	Intergenic
1_2143064_2143849	AT1G06980	AT1G06980	1	2142939	2143977	-	128	5UTR
1_2148206_2148497	AT1G06990	AT1G06990	1	2148342	2150152	+	136	Promoter
1_2160664_2160962	AT1G07040	AT1G07040	1	2160919	2163387	-	2425	3UTR
1_2164043_2164416	AT1G07050	AT1G07050	1	2163575	2165261	-	845	Intronexonboundary
1_2174694_2175221	LSH6	AT1G07090	1	2173952	2175038	-	183	Promoter
1_2176146_2176459	LSH6	AT1G07090	1	2173952	2175038	-	1108	1to5kb
1_2177481_2178099	F2KP	AT1G07110	1	2178022	2184193	-	6094	3UTR
1_2184073_2184311	F2KP	AT1G07110	1	2178022	2184193	-	118	Promoter
1_2190762_2191152	AT1G07135	AT1G07135	1	2189877	2190784	-	22	Promoter
1_2195743_2195975	MAPKKK13	AT1G07150	1	2193941	2195996	-	21	5UTR
1_2199879_2200233	AT1G07160	AT1G07160	1	2197854	2199773	-	106	Promoter
1_2207643_2207974	AT1G07190	AT1G07190	1	2208013	2208177	+	39	Promoter
1_2212116_2212669	AT1G07200	AT1G07200	1	2208477	2212718	-	49	5UTR
1_2213249_2213686	AT1G07200	AT1G07200	1	2208477	2212718	-	531	Promoter
1_2214066_2214297	AT1G07210	AT1G07210	1	2215216	2216982	+	919	Promoter
1_2214590_2215342	AT1G07210	AT1G07210	1	2215216	2216982	+	126	Promoter
1_2219426_2220033	NPC1	AT1G07230	1	2220181	2223018	-	2985	Intergenic
1_2224465_2225002	UGT71C5	AT1G07240	1	2223625	2225524	+	840	Exon
1_2226894_2227234	UGT71C3	AT1G07260	1	2227594	2229357	-	2123	Intergenic
1_2233057_2233496	AT1G07270	AT1G07270	1	2229444	2233017	-	40	Promoter
1_2235926_2237457	AT1G07280	AT1G07280	1	2238017	2241471	+	560	Promoter
1_2237696_2238220	AT1G07280	AT1G07280	1	2238017	2241471	+	203	Promoter
1_2240271_2241066	AT1G07280	AT1G07280	1	2238017	2241471	+	2254	3UTR
1_2268983_2269213	AT1G07380	AT1G07380	1	2264634	2269121	-	92	Promoter
1_2269492_2270120	RLP1	AT1G07390	1	2269622	2274901	+	130	Promoter
1_2277482_2278026	RABA2b	AT1G07410	1	2276030	2277524	+	1452	3UTR
1_2280233_2281611	SMO2-1	AT1G07420	1	2277555	2280502	+	2678	3UTR
1_2282607_2283414	HAI2	AT1G07430	1	2280746	2282828	-	221	Promoter
1_2284170_2285473	AT1G07440	AT1G07440	1	2286185	2287791	-	2318	Intergenic
1_2291299_2291555	AT1G07470	AT1G07470	1	2291369	2294558	+	70	Promoter
1_2299457_2300199	AT1G07480	AT1G07480	1	2296023	2299544	-	87	Promoter
1_2321574_2322578	AT1G07550	AT1G07550	1	2322543	2326570	-	3992	3UTR
1_2334602_2334830	APK1A	AT1G07570	1	2331136	2333767	-	835	Promoter
1_2335605_2336304	AT1G07590	AT1G07590	1	2336477	2339391	-	3087	Intergenic
1_2340513_2340947	MT1C	AT1G07610	1	2341447	2342148	+	500	Promoter
1_2368437_2368874	DSI-1VOC	AT1G07645	1	2367437	2368436	-	1	Promoter
1_2390039_2390290	KCS3	AT1G07720	1	2390531	2392628	-	2338	Intergenic
1_2395036_2395491	EXO70H6	AT1G07725	1	2394801	2397272	-	1781	3UTR
1_2406650_2407217	RPS15A	AT1G07770	1	2407411	2409791	-	2574	Intergenic
1_2415907_2416238	ECA1	AT1G07810	1	2416178	2420829	+	60	Promoter
1_2431668_2433117	AT1G07870	AT1G07870	1	2428773	2432091	-	423	Promoter
1_2436797_2437593	AT1G07885	AT1G07885	1	2435858	2436861	-	64	Promoter
1_2443673_2444000	AT1G07901	AT1G07901	1	2443971	2444123	-	123	Exon
1_2444540_2445446	RNL	AT1G07910	1	2445437	2454645	+	9	Promoter
1_2457506_2457777	AT1G07920	AT1G07920	1	2454771	2457321	+	2735	Intergenic
1_2458036_2458348	AT1G07930	AT1G07930	1	2458184	2460817	+	148	Promoter
1_2462176_2462519	AT1G07940	AT1G07940	1	2462949	2465545	-	3026	Intergenic
1_2484807_2485329	AT1G08005	AT1G08005	1	2485281	2485724	+	48	Promoter
1_2487516_2488046	GATA11	AT1G08010	1	2485848	2488085	-	39	Intronexonboundary
1_2488622_2489628	TPST	AT1G08030	1	2489409	2493327	-	3699	3UTR
1_2498470_2499379	AT1G08040	AT1G08040	1	2495309	2498764	-	294	Promoter
1_2520625_2521040	ACA7	AT1G08080	1	2516991	2518611	-	2014	1to5kb
1_2521337_2521804	NRT2:1	AT1G08090	1	2524023	2526322	+	2219	1to5kb
1_2530145_2530462	NRT2.2	AT1G08100	1	2527170	2529120	-	1025	1to5kb
1_2535167_2535446	AT1G08110	AT1G08110	1	2535251	2537932	+	84	Promoter
1_2537865_2538468	AT1G08110	AT1G08110	1	2535251	2537932	+	2614	Intronexonboundary
1_2547836_2548395	CHX6B	AT1G08135	1	2548496	2551544	-	3149	Intergenic
1_2561040_2561435	AT1G08165	AT1G08165	1	2561449	2562316	-	881	Intergenic
1_2563782_2564416	AT1G08180	AT1G08180	1	2564361	2565318	-	902	3UTR
1_2565073_2565725	AT1G08180	AT1G08180	1	2564361	2565318	-	245	Promoter
1_2567011_2567494	VPS41	AT1G08190	1	2567420	2573448	+	74	Promoter
1_2573581_2574029	VPS41	AT1G08190	1	2567420	2573448	+	6161	Intergenic
1_2590246_2590865	ADT6	AT1G08250	1	2588776	2590609	-	256	Promoter
1_2607690_2608118	AT1G08270	AT1G08270	1	2606269	2607507	-	183	Promoter
1_2629817_2630734	AT1G08340	AT1G08340	1	2630891	2632871	+	157	Promoter
1_2641679_2642222	AT1G08390	AT1G08390	1	2642072	2643285	+	150	Promoter
1_2649183_2650096	AT1G08410	AT1G08410	1	2646144	2649440	+	3039	3UTR
1_2657073_2657467	BSL2	AT1G08420	1	2649459	2657120	+	7614	3UTR
1_2672143_2672501	HDA08	AT1G08460	1	2672198	2674721	+	55	Promoter
1_2675731_2675959	YAB2	AT1G08465	1	2675813	2679824	+	82	Promoter
1_2688488_2688840	ENODL18	AT1G08500	1	2688880	2690250	+	40	Promoter
1_2690940_2692090	FATB	AT1G08510	1	2691062	2694547	-	2457	Intronexonboundary
1_2694030_2695497	FATB	AT1G08510	1	2691062	2694547	-	517	Promoter
1_2706798_2707193	SIG2	AT1G08540	1	2703295	2706860	+	3503	3UTR
1_2711152_2711396	SYP111	AT1G08560	1	2709525	2711000	-	152	Promoter
1_2712066_2712387	ACHT4	AT1G08570	1	2712694	2714833	+	307	Promoter
1_2712808_2713064	ACHT4	AT1G08570	1	2712694	2714833	+	114	5UTR
1_2721819_2722157	AT1G08590	AT1G08590	1	2718538	2722280	+	3281	3UTR
1_2736684_2737153	PKDM7D	AT1G08620	1	2736656	2743881	+	28	Intronexonboundary
1_2752145_2752553	PPCK1	AT1G08650	1	2752124	2753809	+	21	5UTR
1_2753180_2755910	AT1G08645	AT1G08645	1	2751813	2752595	-	585	Promoter
1_2756582_2756880	MGP2	AT1G08660	1	2756904	2759889	-	3009	Intergenic
1_2768758_2769087	ZIGA4	AT1G08680	1	2762584	2768967	+	6174	3UTR
1_2771404_2771679	AT1G08710	AT1G08710	1	2771620	2773531	+	59	Promoter
1_2808688_2808953	AT1G08760	AT1G08760	1	2805044	2808623	+	3644	Intergenic
1_2811187_2811480	AIP3	AT1G08780	1	2809778	2811313	-	126	Promoter
1_2817862_2818301	AT1G08800	AT1G08800	1	2812818	2818071	-	209	Promoter
1_2821203_2821496	VAP27-2	AT1G08820	1	2821354	2825481	-	3985	3UTR
1_2825201_2825623	VAP27-2	AT1G08820	1	2821354	2825481	-	142	Promoter
1_2838703_2839108	AT1G08845	AT1G08845	1	2838789	2841134	+	86	Promoter
1_2864878_2865121	ESL1	AT1G08920	1	2867203	2870745	+	2082	1to5kb
1_2865542_2865922	ESL1	AT1G08920	1	2867203	2870745	+	1281	1to5kb
1_2866389_2866929	ESL1	AT1G08920	1	2867203	2870745	+	274	Promoter
1_2871099_2872547	ESL1	AT1G08920	1	2867203	2870745	+	3896	Intergenic
1_2888439_2888730	PGSIP5	AT1G08990	1	2888427	2890965	+	12	5UTR
1_2899673_2900202	SNF4	AT1G09020	1	2899776	2904862	-	4660	Intronexonboundary
1_2910499_2910800	AT1G09040	AT1G09040	1	2911250	2915406	+	450	Promoter
1_2927473_2927792	SRC2	AT1G09070	1	2927502	2929107	+	29	Promoter
1_2942240_2942597	SR30	AT1G09140	1	2942538	2945976	-	3379	3UTR
1_2945950_2946267	SR30	AT1G09140	1	2942538	2945976	-	26	Promoter
1_2949072_2950097	AT1G09150	AT1G09150	1	2946030	2949159	+	3042	3UTR
1_2950842_2951288	PP2-B15	AT1G09155	1	2949621	2950989	-	147	Promoter
1_2964197_2964847	AT1G09176	AT1G09176	1	2964015	2964727	+	182	3UTR
1_2972424_2972931	AT1G09200	AT1G09200	1	2971571	2972334	-	90	Promoter
1_2976799_2977474	CRT1b	AT1G09210	1	2972638	2977002	-	203	Promoter
1_2982527_2982896	AT1G09230	AT1G09230	1	2979511	2982713	-	183	Promoter
1_2987852_2988141	AT1G09245	AT1G09245	1	2986874	2987393	-	459	Promoter
1_2989180_2989426	AT1G09250	AT1G09250	1	2989141	2990427	+	39	5UTR
1_2990006_2991023	AT1G09250	AT1G09250	1	2989141	2990427	+	865	3UTR
1_2991317_2991616	AT1G09250	AT1G09250	1	2989141	2990427	+	2176	Intergenic
1_3003558_3003991	AT1G09300	AT1G09300	1	3003495	3008381	+	63	Intronexonboundary
1_3012370_3012734	AT1G09330	AT1G09330	1	3012739	3015255	-	2521	Intergenic
1_3018318_3018698	CRB	AT1G09340	1	3015237	3018542	+	3081	3UTR
1_3072035_3072758	AT1G09520	AT1G09520	1	3070915	3072074	-	39	Promoter
1_3079260_3079697	PIF3	AT1G09530	1	3075768	3079654	+	3492	Intronexonboundary
1_3092988_3093874	GLP5	AT1G09560	1	3093644	3094954	+	230	Promoter
1_3100447_3100904	PHYA	AT1G09570	1	3095160	3100819	-	85	Promoter
1_3101220_3101529	AT1G09575	AT1G09575	1	3101149	3103677	-	2148	3UTR
1_3104180_3104755	AT1G09580	AT1G09580	1	3104492	3106366	+	263	Promoter
1_3116657_3117147	AT1G09625	AT1G09625	1	3117137	3117567	-	420	3UTR
1_3117832_3118073	RAB11c	AT1G09630	1	3118155	3119815	-	1742	Intergenic
1_3130903_3131309	AT1G09660	AT1G09660	1	3127762	3131094	-	191	Promoter
1_3137436_3137903	HYL1	AT1G09700	1	3137649	3140353	-	2450	Intronexonboundary
1_3140606_3141034	AT1G09710	AT1G09710	1	3140862	3144381	+	172	Promoter
1_3167776_3168074	iPGAM1	AT1G09780	1	3165370	3167924	-	148	Promoter
1_3180445_3180797	AT1G09800	AT1G09800	1	3176883	3180734	-	63	Promoter
1_3184105_3184531	ECT11	AT1G09810	1	3180926	3184224	-	119	Promoter
1_3194922_3195712	SK41	AT1G09840	1	3195719	3200403	-	4691	Intergenic
1_3200351_3201412	SK41	AT1G09840	1	3195719	3200403	-	52	Promoter
1_3217644_3217965	AT1G09890	AT1G09890	1	3214049	3217603	-	41	Promoter
1_3227002_3227566	OPT2	AT1G09930	1	3227490	3230257	-	2691	Exon
1_3239414_3239744	HEMA2	AT1G09940	1	3236908	3239554	-	140	Promoter
1_3240458_3240822	RAS1	AT1G09950	1	3240531	3241863	-	1041	3UTR
1_3242041_3243223	RAS1	AT1G09950	1	3240531	3241863	-	178	Promoter
1_3249944_3250399	LRR XI-23	AT1G09970	1	3252098	3255782	+	1699	1to5kb
1_3256016_3256780	AT1G09980	AT1G09980	1	3256189	3261741	-	4961	Intronexonboundary
1_3261239_3261890	AT1G09980	AT1G09980	1	3256189	3261741	-	149	Promoter
1_3269011_3270091	AAP8	AT1G10010	1	3265886	3268823	+	3125	Intergenic
1_3271595_3272818	AT1G10020	AT1G10020	1	3269539	3272110	-	515	Promoter
1_3273600_3273910	ERG28	AT1G10030	1	3273753	3275953	+	153	Promoter
1_3278937_3279353	AT1G10050	AT1G10050	1	3278792	3283631	+	145	Intronexonboundary
1_3283934_3284263	BCAT-1	AT1G10060	1	3284073	3287292	+	139	Promoter
1_3295734_3295998	AT1G10090	AT1G10090	1	3290311	3296198	-	200	Intronexonboundary
1_3296252_3296526	AT1G10095	AT1G10095	1	3296516	3300516	-	3990	3UTR
1_3306179_3307136	AT1G10120	AT1G10120	1	3304039	3306956	-	180	Promoter
1_3323122_3323657	AT1G10140	AT1G10140	1	3322554	3323735	-	78	5UTR
1_3324910_3326071	PP2-A10	AT1G10155	1	3325825	3328448	-	2377	3UTR
1_3327848_3328346	PP2-A10	AT1G10155	1	3325825	3328448	-	102	Intronexonboundary
1_3333206_3333781	NFXL1	AT1G10170	1	3333504	3338188	-	4407	3UTR
1_3341608_3342243	AT1G10180	AT1G10180	1	3338185	3341628	-	20	Promoter
1_3347770_3349333	MPK1	AT1G10210	1	3349082	3351180	+	251	Promoter
1_3351948_3352302	AT1G10220	AT1G10220	1	3351923	3353122	+	25	5UTR
1_3353064_3353456	AT1G10220	AT1G10220	1	3351923	3353122	+	1141	3UTR
1_3354964_3355646	SK18	AT1G10230	1	3355675	3356151	+	29	Promoter
1_3361718_3362122	AT1G10250	AT1G10250	1	3360087	3360508	-	1210	1to5kb
1_3369957_3370486	ADL6	AT1G10290	1	3370402	3377463	+	84	Promoter
1_3396710_3397479	ERD9	AT1G10370	1	3396883	3398358	-	879	3UTR
1_3398155_3399011	ERD9	AT1G10370	1	3396883	3398358	-	203	Promoter
1_3419197_3421676	AT1G10410	AT1G10410	1	3416430	3419691	-	494	Promoter
1_3422715_3423335	AT1G10417	AT1G10417	1	3424186	3427531	-	4196	Intergenic
1_3423803_3424132	AT1G10417	AT1G10417	1	3424186	3427531	-	3399	Intergenic
1_3427453_3427680	AT1G10417	AT1G10417	1	3424186	3427531	-	78	Promoter
1_3428339_3428768	PP2A-2	AT1G10430	1	3428478	3430924	-	2156	3UTR
1_3430469_3431136	PP2A-2	AT1G10430	1	3428478	3430924	-	212	Promoter
1_3443841_3444851	ARR4	AT1G10470	1	3441988	3444360	-	491	Promoter
1_3469503_3469861	PRIN2	AT1G10522	1	3469512	3471488	+	9	Promoter
1_3478714_3479721	XTH33	AT1G10550	1	3479066	3481041	-	1320	Intronexonboundary
1_3523286_3523937	AT1G10650	AT1G10650	1	3523986	3526531	-	2594	Intergenic
1_3526101_3526652	AT1G10650	AT1G10650	1	3523986	3526531	-	121	Promoter
1_3527559_3527851	AT1G10650	AT1G10650	1	3523986	3526531	-	1028	1to5kb
1_3529586_3529873	AT1G10657	AT1G10657	1	3530353	3532017	+	480	Promoter
1_3532107_3532510	AT1G10657	AT1G10657	1	3530353	3532017	+	1754	Intergenic
1_3535570_3536063	ACLA-1	AT1G10670	1	3535288	3538439	+	282	Intronexonboundary
1_3547768_3548387	AT1G10690	AT1G10690	1	3549920	3550848	-	2461	Intergenic
1_3550547_3550891	AT1G10690	AT1G10690	1	3549920	3550848	-	43	Promoter
1_3556318_3556671	PRS3	AT1G10700	1	3554104	3556544	+	2214	3UTR
1_3558020_3558356	PHS1	AT1G10710	1	3558358	3560705	+	2	Promoter
1_3570620_3571107	AT1G10740	AT1G10740	1	3567905	3571053	-	54	Promoter
1_3571663_3572029	AT1G10740	AT1G10740	1	3567905	3571053	-	610	Promoter
1_3590517_3590996	SEX1	AT1G10760	1	3580830	3590928	-	68	Promoter
1_3604945_3605195	AT1G10820	AT1G10820	1	3600910	3605076	-	119	Promoter
1_3610261_3610646	TIF3H1	AT1G10840	1	3607631	3610616	-	30	Promoter
1_3611277_3611839	AT1G10850	AT1G10850	1	3611490	3614613	+	213	Promoter
1_3622022_3622432	AGD4	AT1G10870	1	3616610	3623806	-	1374	Intronexonboundary
1_3639417_3639817	EMB3103	AT1G10910	1	3639835	3644187	+	18	Promoter
1_3658231_3659096	TMN1	AT1G10950	1	3659204	3664264	+	108	Promoter
1_3663980_3664376	TMN1	AT1G10950	1	3659204	3664264	+	4776	3UTR
1_3676118_3676781	MLO4	AT1G11000	1	3671756	3676133	-	15	Promoter
1_3681718_3681998	AT1G11050	AT1G11050	1	3681679	3684169	+	39	5UTR
1_3702227_3702739	AT1G11090	AT1G11090	1	3702608	3703779	+	131	Promoter
1_3709469_3709778	AT1G11100	AT1G11100	1	3703672	3709586	-	117	Promoter
1_3710068_3710414	AT1G11110	AT1G11110	1	3710208	3712503	+	140	Promoter
1_3712284_3712634	AT1G11110	AT1G11110	1	3710208	3712503	+	2076	3UTR
1_3713498_3713807	AT1G11112	AT1G11112	1	3712971	3713735	-	72	Promoter
1_3714098_3715047	AT1G11120	AT1G11120	1	3715084	3717659	+	37	Promoter
1_3715737_3715979	AT1G11120	AT1G11120	1	3715084	3717659	+	653	Intron
1_3721081_3721738	SUB	AT1G11130	1	3722708	3727450	+	970	Promoter
1_3732946_3733224	AT1G11160	AT1G11160	1	3733044	3739844	+	98	Promoter
1_3739499_3739767	AT1G11160	AT1G11160	1	3733044	3739844	+	6455	3UTR
1_3745313_3745820	SCAMP2	AT1G11180	1	3745774	3748557	+	46	Promoter
1_3764516_3764762	AT1G11230	AT1G11230	1	3763268	3764483	-	33	Promoter
1_3768171_3768474	SYP125	AT1G11250	1	3768521	3770102	+	47	Promoter
1_3778209_3778948	STP1	AT1G11260	1	3777236	3780823	+	973	Intronexonboundary
1_3786976_3787417	AT1G11280	AT1G11280	1	3787318	3790935	-	3518	3UTR
1_3808971_3809388	AT1G11320	AT1G11320	1	3806822	3808940	+	2149	Intergenic
1_3809799_3810247	AT1G11330	AT1G11330	1	3809795	3813809	+	4	5UTR
1_3832497_3832761	AT1G11380	AT1G11380	1	3832563	3834462	+	66	Promoter
1_3837470_3838062	AT1G11390	AT1G11390	1	3834432	3837676	-	206	Promoter
1_3846944_3847183	DUF2	AT1G11420	1	3844461	3846956	-	12	Promoter
1_3848986_3849391	MORF9	AT1G11430	1	3847220	3849224	+	1766	3UTR
1_3878745_3879140	XTH8	AT1G11545	1	3878495	3880391	-	1251	Intronexonboundary
1_3879497_3879821	XTH8	AT1G11545	1	3878495	3880391	-	570	Intronexonboundary
1_3880415_3880759	XTH8	AT1G11545	1	3878495	3880391	-	24	Promoter
1_3886123_3886763	AT1G11572	AT1G11572	1	3884342	3884960	+	1781	Intergenic
1_3905388_3905735	AT1G11608	AT1G11608	1	3905579	3906818	+	156	Promoter
1_3909698_3910011	CYP71A18	AT1G11610	1	3906862	3909338	-	360	Promoter
1_3920336_3920566	AT1G11660	AT1G11660	1	3920478	3924566	+	88	Promoter
1_3945946_3946383	AT1G11700	AT1G11700	1	3945584	3946757	+	362	Exon
1_3948501_3948761	AT1G11710	AT1G11710	1	3948714	3951359	+	47	Promoter
1_3950921_3951170	AT1G11710	AT1G11710	1	3948714	3951359	+	2207	3UTR
1_3979108_3979483	AT1G11780	AT1G11780	1	3976839	3979237	-	129	Promoter
1_3993405_3993666	AT1G11820	AT1G11820	1	3991027	3993707	-	41	5UTR
1_3994141_3994416	AT1G11820	AT1G11820	1	3991027	3993707	-	434	Promoter
1_3994858_3995394	GLX1	AT1G11840	1	3995158	3997965	+	236	Promoter
1_4000528_4000760	AT1G11860	AT1G11860	1	4001113	4003748	+	353	Promoter
1_4010612_4010860	SEC22	AT1G11890	1	4010757	4013104	+	103	Promoter
1_4028484_4028782	AT1G11930	AT1G11930	1	4028595	4030656	+	111	Promoter
1_4031135_4031389	AT1G11940	AT1G11940	1	4031534	4034155	-	2766	Intergenic
1_4038840_4039400	AT1G11960	AT1G11960	1	4039566	4044046	-	4646	Intergenic
1_4043827_4044550	AT1G11970	AT1G11970	1	4044370	4044669	+	180	Promoter
1_4053644_4053958	AT1G12000	AT1G12000	1	4049896	4053871	-	87	Promoter
1_4060230_4061444	AT1G12020	AT1G12020	1	4061363	4063549	-	2105	3UTR
1_4062440_4062784	AT1G12020	AT1G12020	1	4061363	4063549	-	765	3UTR
1_4063124_4063836	AT1G12020	AT1G12020	1	4061363	4063549	-	287	Promoter
1_4080065_4080755	AT1G12070	AT1G12070	1	4078547	4080236	-	171	Promoter
1_4081812_4082190	AT1G12070	AT1G12070	1	4078547	4080236	-	1576	1to5kb
1_4082482_4082800	AT1G12080	AT1G12080	1	4084162	4085185	+	1362	1to5kb
1_4107755_4108163	NRT1.1	AT1G12110	1	4105223	4109601	+	2532	Intron
1_4117545_4118048	AT1G12120	AT1G12120	1	4114674	4117614	-	69	Promoter
1_4120907_4121591	AT1G12130	AT1G12130	1	4118594	4120959	+	2313	3UTR
1_4125732_4126112	AT1G12150	AT1G12150	1	4123530	4125651	-	81	Promoter
1_4150974_4151402	AT1G12230	AT1G12230	1	4147962	4151056	+	3012	3UTR
1_4151738_4151982	AT1G12230	AT1G12230	1	4147962	4151056	+	3776	Intergenic
1_4152229_4152653	ATBETAFRUCT4	AT1G12240	1	4153641	4157653	+	988	Promoter
1_4153239_4153746	ATBETAFRUCT4	AT1G12240	1	4153641	4157653	+	105	Promoter
1_4154873_4155278	ATBETAFRUCT4	AT1G12240	1	4153641	4157653	+	1232	Intronexonboundary
1_4155706_4156177	ATBETAFRUCT4	AT1G12240	1	4153641	4157653	+	2065	Intronexonboundary
1_4157406_4157655	AT1G12244	AT1G12244	1	4157654	4159046	+	1	Promoter
1_4166952_4167350	NAC007	AT1G12260	1	4162826	4165928	-	1024	1to5kb
1_4186240_4186534	AT1G12300	AT1G12300	1	4183010	4186247	-	7	Promoter
1_4188190_4188571	AT1G12310	AT1G12310	1	4186653	4188233	-	43	Promoter
1_4189274_4189543	AT1G12320	AT1G12320	1	4186624	4190342	+	2650	Intronexonboundary
1_4191397_4194184	AT1G12330	AT1G12330	1	4194420	4196749	+	236	Promoter
1_4194430_4194883	AT1G12330	AT1G12330	1	4194420	4196749	+	10	Intronexonboundary
1_4196151_4196913	AT1G12330	AT1G12330	1	4194420	4196749	+	1731	Intronexonboundary
1_4200867_4201407	KEU	AT1G12360	1	4200864	4206486	+	3	Intronexonboundary
1_4217092_4217987	AT1G12380	AT1G12380	1	4214258	4217412	-	320	Promoter
1_4219748_4220204	AT1G12390	AT1G12390	1	4220044	4221803	+	160	Promoter
1_4225102_4225471	AT1G12411	AT1G12411	1	4225321	4225482	-	11	Exon
1_4226394_4226659	ACR8	AT1G12420	1	4226239	4229211	-	2552	3UTR
1_4228342_4229208	ACR8	AT1G12420	1	4226239	4229211	-	3	Intronexonboundary
1_4229453_4230355	ACR8	AT1G12420	1	4226239	4229211	-	242	Promoter
1_4231045_4231748	ACR8	AT1G12420	1	4226239	4229211	-	1834	1to5kb
1_4232878_4233449	ARK3	AT1G12430	1	4233717	4238795	-	5346	Intergenic
1_4238424_4238788	ARK3	AT1G12430	1	4233717	4238795	-	7	Intronexonboundary
1_4242693_4243174	AT1G12440	AT1G12440	1	4241421	4243229	-	55	Intronexonboundary
1_4246961_4247438	AT1G12460	AT1G12460	1	4247218	4250758	+	220	Promoter
1_4262901_4263765	AT1G12500	AT1G12500	1	4263150	4265156	-	1391	3UTR
1_4264930_4265527	AT1G12500	AT1G12500	1	4263150	4265156	-	226	Promoter
1_4265982_4266348	CCS	AT1G12520	1	4267074	4268982	-	2634	Intergenic
1_4266829_4267174	CCS	AT1G12520	1	4267074	4268982	-	1808	3UTR
1_4278677_4279197	EXPA7	AT1G12560	1	4276505	4277969	+	2172	Intergenic
1_4281819_4282513	PEPKR1	AT1G12580	1	4282794	4285876	+	281	Promoter
1_4290783_4291144	DDF1	AT1G12610	1	4289883	4291017	-	127	Promoter
1_4292663_4293115	AT1G12615	AT1G12615	1	4294055	4294540	-	1425	Intergenic
1_4297079_4297370	AT1G12620	AT1G12620	1	4294552	4297178	-	99	Promoter
1_4305679_4305914	LPLAT1	AT1G12640	1	4303280	4305907	-	7	Promoter
1_4311431_4311734	AT1G12663	AT1G12663	1	4310969	4311519	+	462	Intronexonboundary
1_4328462_4328744	PP2-A12	AT1G12710	1	4326739	4328616	-	128	Promoter
1_4340446_4340893	CYP87A2	AT1G12740	1	4342209	4344875	+	1316	1to5kb
1_4358107_4358895	AT1G12790	AT1G12790	1	4358895	4361371	-	2476	3UTR
1_4365382_4365690	AT1G12800	AT1G12800	1	4361551	4365414	-	32	Promoter
1_4366989_4367450	AT1G12805	AT1G12805	1	4366577	4367136	+	412	3UTR
1_4371198_4371456	AFB3	AT1G12820	1	4368760	4371298	-	100	Promoter
1_4375156_4375434	AT1G12830	AT1G12830	1	4374249	4375247	-	91	Promoter
1_4398132_4398490	ERF1-2	AT1G12920	1	4396348	4398193	-	61	Promoter
1_4419034_4419396	RSH2	AT1G12950	1	4419714	4422684	+	318	Promoter
1_4447357_4447798	AT1G13030	AT1G13030	1	4444043	4447412	-	55	Promoter
1_4455012_4455378	PBE1	AT1G13060	1	4452190	4454900	+	2822	Intron
1_4461562_4461833	CYP71B28	AT1G13090	1	4461738	4463469	+	95	Promoter
1_4466446_4466861	CYP71B7	AT1G13110	1	4467094	4469033	+	233	Promoter
1_4473346_4473629	GLE1	AT1G13120	1	4469144	4473319	-	27	Promoter
1_4492725_4492979	ORP1D	AT1G13170	1	4488533	4492667	-	58	Promoter
1_4513867_4514115	ACA.l	AT1G13210	1	4508906	4514010	-	105	Promoter
1_4522629_4523183	AT1G13230	AT1G13230	1	4520559	4522644	+	2070	Intronexonboundary
1_4523982_4524301	RTFL17	AT1G13245	1	4525414	4526204	-	1903	Intergenic
1_4524733_4525058	RTFL17	AT1G13245	1	4525414	4526204	-	1146	Intergenic
1_4525984_4526381	RTFL17	AT1G13245	1	4525414	4526204	-	177	Promoter
1_4528277_4528577	GATL3	AT1G13250	1	4528485	4530222	-	1645	3UTR
1_4531783_4532379	GATL3	AT1G13250	1	4528485	4530222	-	1561	1to5kb
1_4535849_4536351	GATL3	AT1G13250	1	4528485	4530222	-	5627	Intergenic
1_4539565_4539865	RAV1	AT1G13260	1	4542168	4543970	+	2303	1to5kb
1_4547279_4547574	MAP1C	AT1G13270	1	4544889	4547373	+	2390	3UTR
1_4548498_4548919	AOC4	AT1G13280	1	4547388	4548894	+	1110	3UTR
1_4554221_4554454	HRS1	AT1G13300	1	4556878	4558793	+	2424	1to5kb
1_4576645_4578238	AT1G13350	AT1G13350	1	4572304	4576711	-	66	Promoter
1_4579293_4579603	AT1G13360	AT1G13360	1	4576873	4578369	-	924	Promoter
1_4579905_4580231	AT1G13360	AT1G13360	1	4576873	4578369	-	1536	1to5kb
1_4583649_4584053	AT1G13370	AT1G13370	1	4587780	4588661	-	4608	Intergenic
1_4585146_4585877	AT1G13370	AT1G13370	1	4587780	4588661	-	2784	Intergenic
1_4586541_4587067	AT1G13370	AT1G13370	1	4587780	4588661	-	1594	Intergenic
1_4590236_4590680	AT1G13380	AT1G13380	1	4588994	4590501	-	179	Promoter
1_4593694_4594478	AT1G13390	AT1G13390	1	4592304	4594468	-	10	Promoter
1_4615114_4616189	GT-1	AT1G13450	1	4612731	4615353	-	239	Promoter
1_4621558_4622256	AT1G13470	AT1G13470	1	4620101	4621585	-	27	Promoter
1_4679889_4680315	AT1G13650	AT1G13650	1	4680290	4682382	-	2067	3UTR
1_4692940_4693419	AT1G13680	AT1G13680	1	4690293	4692841	+	2647	Intergenic
1_4708466_4708834	AT1G13730	AT1G13730	1	4709757	4712672	+	923	Promoter
1_4709218_4709459	AT1G13730	AT1G13730	1	4709757	4712672	+	298	Promoter
1_4713250_4713698	AFP2	AT1G13740	1	4713433	4715407	+	183	Promoter
1_4746318_4746602	QUL1	AT1G13860	1	4743204	4746956	-	354	Intronexonboundary
1_4766374_4767427	AT1G13940	AT1G13940	1	4762479	4766852	-	478	Promoter
1_4767735_4768139	AT1G13940	AT1G13940	1	4762479	4766852	-	883	Promoter
1_4768405_4768920	AT1G13940	AT1G13940	1	4762479	4766852	-	1553	1to5kb
1_4771302_4771541	ELF5A-1	AT1G13950	1	4773434	4774935	+	1893	1to5kb
1_4772833_4773181	ELF5A-1	AT1G13950	1	4773434	4774935	+	253	Promoter
1_4775549_4775845	WRKY4	AT1G13960	1	4776283	4779420	+	438	Promoter
1_4776218_4777157	WRKY4	AT1G13960	1	4776283	4779420	+	65	Promoter
1_4787802_4788636	GN	AT1G13980	1	4788463	4794654	+	173	Promoter
1_4802334_4803221	AT1G14020	AT1G14020	1	4802720	4805375	+	386	Promoter
1_4807401_4807723	LSMT-L	AT1G14030	1	4805306	4807517	-	116	Promoter
1_4810168_4810574	AT1G14040	AT1G14040	1	4810115	4814724	+	53	5UTR
1_4810986_4811337	AT1G14040	AT1G14040	1	4810115	4814724	+	871	Intronexonboundary
1_4827450_4827714	FUT8	AT1G14100	1	4827961	4829587	+	247	Promoter
1_4837439_4838019	UCP3	AT1G14140	1	4837927	4839633	-	1614	3UTR
1_4861041_4861291	AT1G14230	AT1G14230	1	4861168	4864094	+	123	Promoter
1_4875883_4876270	AT1G14260	AT1G14260	1	4872856	4874907	+	3027	Intergenic
1_4877261_4877715	AT1G14270	AT1G14270	1	4874875	4877256	-	5	Promoter
1_4878854_4880115	SBH2	AT1G14290	1	4880030	4882265	-	2150	3UTR
1_4884923_4885154	AT1G14310	AT1G14310	1	4884951	4886793	+	28	Promoter
1_4888021_4888270	AT1G14315	AT1G14315	1	4886768	4887933	-	88	Promoter
1_4889674_4890016	SAC52	AT1G14320	1	4888114	4889704	+	1560	3UTR
1_4894418_4895040	AT1G14330	AT1G14330	1	4890069	4892332	-	2086	1to5kb
1_4896285_4896547	AT1G14340	AT1G14340	1	4897346	4899035	+	799	Promoter
1_4903885_4904246	FLP	AT1G14350	1	4907887	4911168	+	3641	1to5kb
1_4904680_4904984	FLP	AT1G14350	1	4907887	4911168	+	2903	1to5kb
1_4907992_4908402	FLP	AT1G14350	1	4907887	4911168	+	105	Intronexonboundary
1_4921528_4921859	IQD28	AT1G14380	1	4918010	4921682	-	154	Promoter
1_4935843_4936104	AT1G14430	AT1G14430	1	4934120	4936194	+	1723	3UTR
1_4940788_4941119	HB31	AT1G14440	1	4938754	4941332	-	213	5UTR
1_4945978_4946284	AT1G14450	AT1G14450	1	4946192	4947670	-	1386	3UTR
1_4964172_4964593	AL7	AT1G14510	1	4961594	4964515	-	78	Promoter
1_4973463_4973948	PER4	AT1G14540	1	4974021	4975705	-	1757	Intergenic
1_4983182_4983558	AT1G14570	AT1G14570	1	4983489	4987375	+	69	Promoter
1_4997976_4999039	AT1G14590	AT1G14590	1	4998767	5000710	-	1671	Intronexonboundary
1_5016957_5017422	DECOY	AT1G14620	1	5014675	5016708	-	249	Promoter
1_5027372_5027846	AT1G14650	AT1G14650	1	5027316	5031883	+	56	Intronexonboundary
1_5037174_5037710	AT1G14670	AT1G14670	1	5037576	5040597	+	134	Promoter
1_5040514_5040921	AT1G14670	AT1G14670	1	5037576	5040597	+	2938	3UTR
1_5042183_5042629	BPC2	AT1G14685	1	5042240	5045556	+	57	Promoter
1_5055279_5055984	MAP65-7	AT1G14690	1	5051656	5055299	-	20	Promoter
1_5057730_5058175	PAP3	AT1G14700	1	5058583	5061140	+	408	Promoter
1_5068901_5069372	XTH28	AT1G14720	1	5066525	5068677	-	224	Promoter
1_5070461_5071392	AT1G14730	AT1G14730	1	5073031	5074798	+	1639	1to5kb
1_5077734_5078124	TTA1	AT1G14740	1	5075179	5077981	-	143	Promoter
1_5084473_5084908	AT1G14755	AT1G14755	1	5083676	5084342	+	797	Intergenic
1_5088943_5089455	AT1G14770	AT1G14770	1	5086595	5088898	-	45	Promoter
1_5115516_5115912	MAP70-4	AT1G14840	1	5111701	5115514	-	2	Promoter
1_5144156_5144789	AT1G14910	AT1G14910	1	5139712	5143735	-	421	Promoter
1_5146696_5148224	GAI	AT1G14920	1	5148982	5151415	+	758	Promoter
1_5149119_5149488	GAI	AT1G14920	1	5148982	5151415	+	137	5UTR
1_5150829_5151922	AT1G14930	AT1G14930	1	5152263	5153104	-	1182	Intergenic
1_5160986_5161214	AT1G14970	AT1G14970	1	5161645	5165181	-	3967	Intergenic
1_5166668_5166944	CPN10	AT1G14980	1	5165489	5166939	-	5	Promoter
1_5168168_5168461	scpl50	AT1G15000	1	5168464	5170066	+	3	Promoter
1_5170449_5170820	AT1G15010	AT1G15010	1	5171181	5171956	+	361	Promoter
1_5176126_5176437	QSOX1	AT1G15020	1	5172232	5176479	-	42	5UTR
1_5177287_5177519	AT1G15030	AT1G15030	1	5177480	5180049	+	39	Promoter
1_5186923_5187161	AT1G15060	AT1G15060	1	5183258	5187106	-	55	Promoter
1_5193047_5194205	RHA2A	AT1G15100	1	5193284	5194214	-	9	5UTR
1_5194568_5194897	RHA2A	AT1G15100	1	5193284	5194214	-	354	Promoter
1_5195567_5196211	RHA2A	AT1G15100	1	5193284	5194214	-	1353	1to5kb
1_5197587_5198125	PSS1	AT1G15110	1	5198940	5202315	+	815	Promoter
1_5202558_5202835	AT1G15120	AT1G15120	1	5202593	5204494	+	35	Promoter
1_5205415_5206417	AT1G15130	AT1G15130	1	5206002	5209979	-	3562	3UTR
1_5219988_5220454	AT1G15170	AT1G15170	1	5220403	5222973	+	51	Promoter
1_5237777_5238100	SHH1	AT1G15215	1	5238044	5240051	+	56	Promoter
1_5241375_5241674	CCMH	AT1G15220	1	5240029	5241541	-	133	Promoter
1_5249436_5249807	AT1G15260	AT1G15260	1	5249760	5250573	+	47	Promoter
1_5271961_5272240	AT1G15320	AT1G15320	1	5272256	5274074	-	1834	Intergenic
1_5277449_5278255	AT1G15350	AT1G15350	1	5278027	5279988	-	1733	3UTR
1_5281718_5282670	SHN1	AT1G15360	1	5283268	5284736	+	598	Promoter
1_5285467_5285978	SHN1	AT1G15360	1	5283268	5284736	+	2199	Intergenic
1_5293892_5294120	PDF1A	AT1G15390	1	5294629	5295931	+	509	Promoter
1_5296689_5297084	AT1G15400	AT1G15400	1	5295756	5297075	-	9	Promoter
1_5297591_5298981	AT1G15400	AT1G15400	1	5295756	5297075	-	516	Promoter
1_5303353_5303625	AT1G15420	AT1G15420	1	5301516	5303522	-	103	Promoter
1_5323664_5323909	AT1G15490	AT1G15490	1	5320615	5323895	-	14	Promoter
1_5324295_5325409	AT1G15490	AT1G15490	1	5320615	5323895	-	400	Promoter
1_5326115_5326448	ATNTT2	AT1G15500	1	5326290	5328875	+	158	Promoter
1_5339355_5340354	AT1G15530	AT1G15530	1	5339961	5341931	-	1577	Exon
1_5348553_5348895	GA3OX1	AT1G15550	1	5344388	5346342	-	2211	1to5kb
1_5349501_5349770	GA3OX1	AT1G15550	1	5344388	5346342	-	3159	1to5kb
1_5360229_5360892	CYCA2%3B3	AT1G15570	1	5361865	5365559	+	973	Promoter
1_5380798_5381044	CENP-C	AT1G15660	1	5381032	5385380	+	12	Promoter
1_5386463_5387341	CENP-C	AT1G15660	1	5381032	5385380	+	5431	Intergenic
1_5389937_5391142	AT1G15670	AT1G15670	1	5389952	5391672	+	15	Promoter
1_5396060_5396365	AT1G15680	AT1G15680	1	5393407	5394639	+	2653	Intronexonboundary
1_5397518_5398093	AVP1	AT1G15690	1	5398926	5402733	+	833	Promoter
1_5398708_5399012	AVP1	AT1G15690	1	5398926	5402733	+	86	Promoter
1_5402317_5402605	ATPC2	AT1G15700	1	5402569	5403818	-	1213	3UTR
1_5404287_5404800	AT1G15710	AT1G15710	1	5404130	5405910	+	157	5UTR
1_5405517_5406070	TRFL5	AT1G15720	1	5406025	5407486	+	45	Promoter
1_5409812_5410113	AT1G15730	AT1G15730	1	5407401	5410043	-	70	Promoter
1_5423021_5423883	AT1G15757	AT1G15757	1	5424242	5424579	-	696	Intergenic
1_5436436_5436718	NRB4	AT1G15780	1	5430040	5436618	-	100	Promoter
1_5440122_5440359	AT1G15790	AT1G15790	1	5438171	5440131	-	9	Promoter
1_5442442_5442794	AT1G15800	AT1G15800	1	5441072	5443911	-	1117	Intron
1_5443476_5443966	AT1G15800	AT1G15800	1	5441072	5443911	-	55	Promoter
1_5454276_5454645	AT1G15860	AT1G15860	1	5454766	5457022	+	121	Promoter
1_5469221_5469535	AT1G15920	AT1G15920	1	5469255	5471149	+	34	Promoter
1_5470606_5471438	AT1G15930	AT1G15930	1	5471316	5473048	+	122	Promoter
1_5479712_5479941	CCR1	AT1G15950	1	5478603	5482180	+	1109	Intronexonboundary
1_5481097_5481697	NRAMP6	AT1G15960	1	5481665	5486105	-	4408	3UTR
1_5488609_5489292	PnsB1	AT1G15980	1	5489145	5491363	+	147	Promoter
1_5497907_5498205	AT1G16020	AT1G16020	1	5498012	5501358	+	105	Promoter
1_5508015_5508316	ADAP	AT1G16060	1	5508311	5511736	+	5	Promoter
1_5509052_5509331	ADAP	AT1G16060	1	5508311	5511736	+	741	Intronexonboundary
1_5540179_5540468	AT1G16180	AT1G16180	1	5540050	5542902	+	129	Intronexonboundary
1_5542919_5543298	AT1G16180	AT1G16180	1	5540050	5542902	+	2869	Intergenic
1_5562758_5563102	AT1G16270	AT1G16270	1	5562861	5568368	+	103	Promoter
1_5587441_5587698	CYCB3%3B1	AT1G16330	1	5582387	5587461	-	20	Promoter
1_5613110_5613620	MC8	AT1G16420	1	5612150	5614020	-	400	Intronexonboundary
1_5617551_5617791	AT1G16445	AT1G16445	1	5617786	5619456	+	5	Promoter
1_5634185_5634449	MYB58	AT1G16490	1	5629655	5631088	-	3097	1to5kb
1_5638896_5639236	AT1G16500	AT1G16500	1	5638779	5640202	+	117	Intronexonboundary
1_5641180_5641725	AT1G16500	AT1G16500	1	5638779	5640202	+	2401	Intron
1_5642070_5642955	AT1G16510	AT1G16510	1	5644572	5645443	-	2488	Intergenic
1_5646243_5646955	AT1G16515	AT1G16515	1	5647462	5648114	-	1159	Intergenic
1_5647218_5647515	AT1G16515	AT1G16515	1	5647462	5648114	-	599	3UTR
1_5647895_5648911	AT1G16515	AT1G16515	1	5647462	5648114	-	219	Promoter
1_5678548_5679021	SR45	AT1G16610	1	5675495	5678873	-	148	Promoter
1_5685161_5685597	AT1G16630	AT1G16630	1	5681973	5684909	-	252	Promoter
1_5722499_5723102	HAC12	AT1G16710	1	5713794	5722614	+	8705	3UTR
1_5727413_5727708	UP6	AT1G16730	1	5726368	5727406	-	7	Promoter
1_5731794_5732117	AT1G16750	AT1G16750	1	5729057	5731934	-	140	Promoter
1_5732454_5732865	AT1G16750	AT1G16750	1	5729057	5731934	-	520	Promoter
1_5738762_5739050	AT1G16770	AT1G16770	1	5737839	5739377	+	923	Exon
1_5744311_5744584	AT1G16790	AT1G16790	1	5744335	5745259	+	24	Promoter
1_5758243_5758883	AT1G16825	AT1G16825	1	5758855	5760509	+	28	Promoter
1_5765624_5766018	AT1G16850	AT1G16850	1	5764807	5765798	-	174	Promoter
1_5767065_5767500	AT1G16860	AT1G16860	1	5767300	5770602	+	200	Promoter
1_5773215_5773820	AT1G16870	AT1G16870	1	5770732	5773322	-	107	Promoter
1_5776083_5776344	ACR11	AT1G16880	1	5773512	5776308	+	2571	Intronexonboundary
1_5786306_5786599	AT1G16916	AT1G16916	1	5786557	5787329	-	730	3UTR
1_5828800_5829160	SPS2	AT1G17050	1	5828915	5831383	+	115	Promoter
1_5831527_5832060	CYP72C1	AT1G17060	1	5832094	5835488	-	3428	Intergenic
1_5833686_5834027	AT1G17065	AT1G17065	1	5832303	5834030	+	1383	Intronexonboundary
1_5841396_5841792	AT1G17080	AT1G17080	1	5840269	5841745	-	47	Promoter
1_5844103_5844754	HBP1	AT1G17100	1	5844646	5845661	+	108	Promoter
1_5859612_5860080	AT1G17145	AT1G17145	1	5860078	5862890	-	2810	3UTR
1_5864554_5864836	AT1G17147	AT1G17147	1	5863109	5864059	-	495	Promoter
1_5873206_5873733	GSTU25	AT1G17180	1	5872024	5873124	+	1182	Intergenic
1_5875930_5876330	GSTU26	AT1G17190	1	5875295	5876620	+	635	Intronexonboundary
1_5895868_5896219	RTFL11	AT1G17235	1	5895351	5896250	+	517	3UTR
1_5919991_5920549	AT1G17285	AT1G17285	1	5920542	5921483	+	7	Promoter
1_5922591_5922841	AlaAT1	AT1G17290	1	5922332	5926400	+	259	5UTR
1_5931585_5932035	AT1G17330	AT1G17330	1	5929826	5931926	+	1759	Intronexonboundary
1_5944835_5945760	AT1G17350	AT1G17350	1	5941549	5944465	+	3286	Intergenic
1_5946065_5946462	AT1G17360	AT1G17360	1	5946448	5951561	+	14	Promoter
1_5954669_5955285	JAZ5	AT1G17380	1	5955155	5957511	-	2226	3UTR
1_5957659_5958692	JAZ5	AT1G17380	1	5955155	5957511	-	148	Promoter
1_5987646_5987985	EER4	AT1G17440	1	5983984	5987934	-	51	Promoter
1_5998548_5999026	ELF4-L4	AT1G17455	1	5997057	5998599	+	1491	3UTR
1_6017740_6017983	AT1G17500	AT1G17500	1	6017808	6023503	+	68	Promoter
1_6038740_6039054	HLL	AT1G17560	1	6037405	6038698	-	42	Promoter
1_6049297_6049604	MYA1	AT1G17580	1	6039250	6049685	+	10047	3UTR
1_6098276_6098626	ATB BETA	AT1G17720	1	6093185	6098443	-	167	Promoter
1_6103041_6103277	AT1G17744	AT1G17744	1	6100961	6101983	-	1058	1to5kb
1_6135825_6136150	AT1G17830	AT1G17830	1	6135751	6138500	-	2350	3UTR
1_6137900_6138703	AT1G17830	AT1G17830	1	6135751	6138500	-	203	Promoter
1_6141726_6142653	ABCG11	AT1G17840	1	6142402	6146521	+	251	Promoter
1_6153839_6154258	GER2	AT1G17890	1	6154264	6155804	-	1546	Intergenic
1_6155789_6156032	GER2	AT1G17890	1	6154264	6155804	-	15	Promoter
1_6174333_6174797	AT1G17940	AT1G17940	1	6169285	6173273	-	1060	1to5kb
1_6184109_6184449	AT1G17970	AT1G17970	1	6184717	6187499	+	268	Promoter
1_6219315_6219738	AT1G18070	AT1G18070	1	6213651	6218384	-	931	Promoter
1_6221870_6222206	ATARCA	AT1G18080	1	6222201	6224242	+	5	Promoter
1_6224274_6224550	ATARCA	AT1G18080	1	6222201	6224242	+	2073	Intergenic
1_6237538_6238309	AT1G18130	AT1G18130	1	6235895	6238799	+	1643	Intronexonboundary
1_6239796_6240240	LAC1	AT1G18140	1	6238839	6241510	-	1270	Intronexonboundary
1_6247696_6247989	ATMPK8	AT1G18150	1	6244298	6247830	-	134	Promoter
1_6248596_6248853	AT1G18160	AT1G18160	1	6248619	6254080	+	23	Promoter
1_6261458_6261807	GC2	AT1G18190	1	6257851	6261501	-	43	Promoter
1_6265823_6266127	RABA6b	AT1G18200	1	6265416	6267076	-	949	Intronexonboundary
1_6267174_6267880	RABA6b	AT1G18200	1	6265416	6267076	-	98	Promoter
1_6268481_6268861	AT1G18210	AT1G18210	1	6266609	6268939	-	78	5UTR
1_6298929_6300007	NUDT4	AT1G18300	1	6299669	6301139	+	338	Promoter
1_6308051_6308384	EPR1	AT1G18330	1	6305814	6308243	-	141	Promoter
1_6311291_6311608	AT1G18335	AT1G18335	1	6308925	6311373	-	82	Promoter
1_6325713_6326008	AT1G18390	AT1G18390	1	6325536	6330179	+	177	5UTR
1_6330287_6331856	AT1G18390	AT1G18390	1	6325536	6330179	+	4751	Intergenic
1_6333398_6333769	BEE1	AT1G18400	1	6331398	6333856	+	2000	Intronexonboundary
1_6334251_6334521	BEE1	AT1G18400	1	6331398	6333856	+	2853	Intergenic
1_6345759_6346000	AT1G18440	AT1G18440	1	6345974	6347918	+	26	Promoter
1_6356163_6356439	AT1G18460	AT1G18460	1	6352325	6356113	+	3838	Intergenic
1_6360114_6360606	AT1G18470	AT1G18470	1	6355695	6360344	-	230	Promoter
1_6361354_6361647	SLP2	AT1G18480	1	6361586	6363061	+	61	Promoter
1_6372679_6373061	MAML-4	AT1G18500	1	6368966	6373080	+	3713	Intronexonboundary
1_6385151_6385489	AT1G18560	AT1G18560	1	6385186	6388180	+	35	Promoter
1_6405384_6405753	AT1G18610	AT1G18610	1	6405607	6409532	+	146	Promoter
1_6414486_6414869	TRM3	AT1G18620	1	6409655	6414569	+	4831	3UTR
1_6446472_6446712	AT1G18700	AT1G18700	1	6437474	6444076	+	8998	Intron
1_6452610_6453275	MYB47	AT1G18710	1	6450585	6453263	+	2025	3UTR
1_6459632_6460537	AT1G18720	AT1G18720	1	6457775	6460405	-	132	Promoter
1_6462658_6462894	PnsB4	AT1G18730	1	6460403	6462344	+	2255	Intergenic
1_6463523_6464088	AT1G18740	AT1G18740	1	6463849	6465476	+	239	Promoter
1_6466448_6466690	AGL65	AT1G18750	1	6466667	6469984	+	23	Promoter
1_6474416_6474956	AT1G18773	AT1G18773	1	6474802	6475979	+	154	Promoter
1_6484020_6484434	NRP2	AT1G18800	1	6481113	6483646	-	374	Promoter
1_6486500_6486775	AT1G18810	AT1G18810	1	6485515	6487153	-	378	Intronexonboundary
1_6488585_6489075	AT1G18830	AT1G18830	1	6489233	6494634	+	158	Promoter
1_6506306_6506717	AT1G18850	AT1G18850	1	6504677	6506542	-	175	Promoter
1_6507576_6507829	WRKY61	AT1G18860	1	6508797	6511397	+	968	Promoter
1_6511733_6512254	WRKY61	AT1G18860	1	6508797	6511397	+	2936	Intergenic
1_6515463_6516114	ICS2	AT1G18870	1	6515373	6519395	+	90	Intronexonboundary
1_6525856_6526179	CDPK1	AT1G18890	1	6522764	6526075	-	104	Promoter
1_6528242_6529201	AT1G18900	AT1G18900	1	6528984	6532697	+	217	Promoter
1_6543641_6543894	AT1G18940	AT1G18940	1	6543781	6545802	+	113	Promoter
1_6545990_6546666	AT1G18950	AT1G18950	1	6546177	6552108	+	187	Promoter
1_6555746_6556086	GLP4	AT1G18970	1	6554496	6555610	-	136	Promoter
1_6560906_6561152	AT1G18990	AT1G18990	1	6558574	6560561	-	345	Promoter
1_6562684_6563169	AT1G19000	AT1G19000	1	6560491	6562791	-	107	Promoter
1_6565354_6565760	AT1G19010	AT1G19010	1	6565494	6567662	+	140	Promoter
1_6579085_6579531	ARR7	AT1G19050	1	6577833	6579314	-	217	Promoter
1_6594637_6595157	DMS11	AT1G19100	1	6594883	6601355	+	246	Promoter
1_6612512_6612871	AT1G19140	AT1G19140	1	6610652	6612609	-	97	Promoter
1_6620780_6621335	JAZ1	AT1G19180	1	6621777	6623668	+	442	Promoter
1_6621763_6622246	JAZ1	AT1G19180	1	6621777	6623668	+	14	Promoter
1_6626701_6627061	AT1G19210	AT1G19210	1	6626794	6627688	-	627	3UTR
1_6633043_6633701	ARF19	AT1G19220	1	6627683	6633133	-	90	Promoter
1_6638509_6639387	AT1G19230	AT1G19230	1	6643942	6649375	+	4555	1to5kb
1_6661580_6661814	DA1	AT1G19270	1	6662417	6666032	+	603	Promoter
1_6662427_6663124	DA1	AT1G19270	1	6662417	6666032	+	10	Intronexonboundary
1_6670757_6671246	PARVUS	AT1G19300	1	6671095	6672777	-	1531	3UTR
1_6673454_6673877	PARVUS	AT1G19300	1	6671095	6672777	-	677	Promoter
1_6680373_6680599	AT1G19330	AT1G19330	1	6680423	6683559	-	2960	3UTR
1_6683501_6684068	AT1G19330	AT1G19330	1	6680423	6683559	-	58	Promoter
1_6684342_6684646	AT1G19340	AT1G19340	1	6684467	6687116	+	125	Promoter
1_6687109_6687466	AT1G19340	AT1G19340	1	6684467	6687116	+	2642	3UTR
1_6688563_6688895	BES1	AT1G19350	1	6688463	6691216	+	100	5UTR
1_6694757_6695524	AT1G19370	AT1G19370	1	6692724	6695055	-	298	Promoter
1_6696682_6697001	AT1G19380	AT1G19380	1	6697874	6698858	+	873	Promoter
1_6734794_6735299	AT1G19450	AT1G19450	1	6731411	6735024	-	230	Promoter
1_6737724_6738470	AT1G19460	AT1G19460	1	6738484	6739734	+	14	Promoter
1_6746372_6746739	AT1G19485	AT1G19485	1	6746778	6751609	+	39	Promoter
1_6753561_6754650	AT1G19500	AT1G19500	1	6754665	6755684	-	1034	Intergenic
1_6795759_6795998	AT1G19650	AT1G19650	1	6796137	6799764	-	3766	Intergenic
1_6799585_6799999	AT1G19660	AT1G19660	1	6799969	6802906	-	2907	3UTR
1_6802739_6803392	CLH1	AT1G19670	1	6803486	6805092	-	1700	Intergenic
1_6805067_6805646	CLH1	AT1G19670	1	6803486	6805092	-	25	Promoter
1_6812203_6813036	BEL10	AT1G19700	1	6809585	6813063	-	27	Intronexonboundary
1_6814376_6814656	AT1G19710	AT1G19710	1	6814704	6816876	+	48	Promoter
1_6850785_6851052	AT1G19830	AT1G19830	1	6852116	6852945	+	1064	1to5kb
1_6853157_6853839	AT1G19830	AT1G19830	1	6852116	6852945	+	1041	Intergenic
1_6854309_6855183	AT1G19835	AT1G19835	1	6855899	6860563	-	5380	Intergenic
1_6860121_6860776	AT1G19835	AT1G19835	1	6855899	6860563	-	213	Promoter
1_6861446_6861693	AT1G19835	AT1G19835	1	6855899	6860563	-	883	Promoter
1_6865592_6866138	AT1G19835	AT1G19835	1	6855899	6860563	-	5029	Intergenic
1_6867766_6868179	AT1G19840	AT1G19840	1	6872275	6873358	-	5179	Intergenic
1_6873160_6873483	AT1G19840	AT1G19840	1	6872275	6873358	-	125	Promoter
1_6873846_6874151	AT1G19840	AT1G19840	1	6872275	6873358	-	488	Promoter
1_6874548_6875262	AT1G19840	AT1G19840	1	6872275	6873358	-	1190	1to5kb
1_6875601_6876120	AT1G19840	AT1G19840	1	6872275	6873358	-	2243	1to5kb
1_6877163_6877729	AT1G19840	AT1G19840	1	6872275	6873358	-	3805	1to5kb
1_6879784_6880070	AT1G19840	AT1G19840	1	6872275	6873358	-	6426	Intergenic
1_6884477_6884731	MP	AT1G19850	1	6886669	6891404	+	1938	1to5kb
1_6899203_6899761	iqd32	AT1G19870	1	6895009	6898818	-	385	Promoter
1_6912834_6913528	AVA-P2	AT1G19910	1	6913001	6914634	+	167	Promoter
1_6916584_6917051	AT1G19930	AT1G19930	1	6917020	6918138	+	31	Promoter
1_6932840_6933178	AT1G19970	AT1G19970	1	6931012	6932826	-	14	Promoter
1_6937470_6937790	TUB5	AT1G20010	1	6937719	6940832	-	3042	3UTR
1_6939467_6939898	TUB5	AT1G20010	1	6937719	6940832	-	934	Intron
1_6940354_6940894	TUB5	AT1G20010	1	6937719	6940832	-	62	Promoter
1_6946154_6947021	AT1G20030	AT1G20030	1	6945425	6947344	+	729	Intronexonboundary
1_6965014_6965923	SYTB	AT1G20080	1	6962030	6965443	+	2984	Intronexonboundary
1_6970747_6971144	AT1G20100	AT1G20100	1	6969025	6971036	-	108	Promoter
1_6986151_6986459	SK4	AT1G20140	1	6986312	6987863	+	147	Promoter
1_6994743_6996439	AT1G20180	AT1G20180	1	6996176	6997943	+	263	Promoter
1_6998738_6999061	EXPA11	AT1G20190	1	6998335	6999839	-	778	Intronexonboundary
1_6999601_6999954	EXPA11	AT1G20190	1	6998335	6999839	-	115	Promoter
1_7000249_7000483	EXPA11	AT1G20190	1	6998335	6999839	-	410	Promoter
1_7000837_7001100	EMB2719	AT1G20200	1	7001087	7004432	-	3332	3UTR
1_7004325_7004661	EMB2719	AT1G20200	1	7001087	7004432	-	107	Promoter
1_7016350_7016706	VAB3	AT1G20260	1	7016599	7020690	+	107	Promoter
1_7037957_7038627	SMT2	AT1G20330	1	7038527	7040231	-	1604	3UTR
1_7040570_7040936	SMT2	AT1G20330	1	7038527	7040231	-	339	Promoter
1_7041234_7041913	DRT112	AT1G20340	1	7042046	7043392	-	1479	Intergenic
1_7061455_7062191	AT1G20380	AT1G20380	1	7061442	7065242	+	13	Intronexonboundary
1_7082423_7082727	AT1G20410	AT1G20410	1	7078804	7082566	-	143	Promoter
1_7083829_7084435	COR47	AT1G20440	1	7084409	7086873	-	2438	3UTR
1_7086406_7087388	COR47	AT1G20440	1	7084409	7086873	-	467	Promoter
1_7087896_7088315	ERD10	AT1G20450	1	7087903	7089606	-	1291	3UTR
1_7089831_7091331	ERD10	AT1G20450	1	7087903	7089606	-	225	Promoter
1_7121780_7122106	AT1G20570	AT1G20570	1	7121853	7126559	-	4453	Intronexonboundary
1_7137541_7137847	CYCB2%3B3	AT1G20610	1	7134659	7137828	-	19	Promoter
1_7139416_7139662	CYCB2%3B3	AT1G20610	1	7134659	7137828	-	1588	1to5kb
1_7142691_7143167	CAT3	AT1G20620	1	7142972	7146540	+	195	Promoter
1_7146473_7146838	CAT3	AT1G20620	1	7142972	7146540	+	3501	3UTR
1_7160209_7160456	ASG5	AT1G20650	1	7157826	7160590	-	134	5UTR
1_7164194_7164571	AT1G20670	AT1G20670	1	7164082	7168041	-	3470	3UTR
1_7167812_7168302	AT1G20670	AT1G20670	1	7164082	7168041	-	229	Promoter
1_7176486_7176829	HMGB2	AT1G20693	1	7176747	7178895	+	82	Promoter
1_7209154_7209617	AT1G20750	AT1G20750	1	7203302	7209013	-	141	Promoter
1_7216846_7217074	AT1G20770	AT1G20770	1	7215010	7216897	-	51	Promoter
1_7233410_7233757	AT1G20810	AT1G20810	1	7231981	7233657	+	1429	3UTR
1_7242510_7242941	MCD1	AT1G20830	1	7242896	7244978	+	45	Promoter
1_7244817_7245086	MCD1	AT1G20830	1	7242896	7244978	+	1921	3UTR
1_7248140_7248600	TMT1	AT1G20840	1	7244939	7248494	-	106	Promoter
1_7261404_7261791	AT1G20875	AT1G20875	1	7261481	7261681	+	77	Promoter
1_7321196_7321486	AT1G20970	AT1G20970	1	7313901	7319921	+	7295	Intergenic
1_7322609_7323496	SPL14	AT1G20980	1	7324471	7329441	+	975	Promoter
1_7324365_7324721	SPL14	AT1G20980	1	7324471	7329441	+	106	Promoter
1_7334126_7334376	AT1G20990	AT1G20990	1	7330256	7332100	-	2026	1to5kb
1_7335399_7336133	AT1G21000	AT1G21000	1	7337605	7339452	+	1472	1to5kb
1_7341557_7341823	AT1G21000	AT1G21000	1	7337605	7339452	+	3952	Intron
1_7343538_7343793	AT1G21010	AT1G21010	1	7346156	7347283	+	2363	1to5kb
1_7382391_7382663	AT1G21080	AT1G21080	1	7378538	7382661	-	2	Promoter
1_7420876_7421155	AT1G21200	AT1G21200	1	7421148	7423673	+	7	Promoter
1_7442971_7443268	WAK1	AT1G21250	1	7439171	7442113	+	3800	Intergenic
1_7488719_7489155	AT1G21380	AT1G21380	1	7485636	7488780	-	61	Promoter
1_7491287_7491543	AT1G21395	AT1G21395	1	7491965	7492351	+	422	Promoter
1_7496282_7497230	SKP2A	AT1G21410	1	7496998	7499616	+	232	Promoter
1_7503705_7504531	AT1G21440	AT1G21440	1	7502082	7504275	-	256	Promoter
1_7508553_7509182	SCL1	AT1G21450	1	7508701	7511801	+	148	Promoter
1_7513767_7515251	SWEET1	AT1G21460	1	7511750	7513481	-	286	Promoter
1_7515729_7516048	AT1G21470	AT1G21470	1	7516009	7517637	-	1589	3UTR
1_7516883_7519365	AT1G21480	AT1G21480	1	7518946	7521552	-	2187	3UTR
1_7521480_7521994	AT1G21480	AT1G21480	1	7518946	7521552	-	72	Promoter
1_7550737_7550989	AT1G21540	AT1G21540	1	7548450	7550741	-	4	Promoter
1_7565855_7566110	AT1G21580	AT1G21580	1	7557140	7565914	-	59	Promoter
1_7570636_7571030	PTAC6	AT1G21600	1	7570845	7573847	-	2817	3UTR
1_7605522_7605805	AT1G21660	AT1G21660	1	7605620	7609223	+	98	Promoter
1_7609612_7610052	AT1G21670	AT1G21670	1	7610241	7612721	+	189	Promoter
1_7611969_7612244	AT1G21670	AT1G21670	1	7610241	7612721	+	1728	Exon
1_7629820_7630533	AT1G21730	AT1G21730	1	7630107	7636658	+	287	Promoter
1_7640964_7641325	AT1G21738	AT1G21738	1	7640992	7641225	-	100	Promoter
1_7653844_7654158	AT1G21790	AT1G21790	1	7654088	7655981	+	70	Promoter
1_7659748_7660221	AT1G21810	AT1G21810	1	7656319	7659167	-	581	Promoter
1_7660649_7661278	AT1G21830	AT1G21830	1	7660947	7662725	-	1447	3UTR
1_7662506_7662829	AT1G21830	AT1G21830	1	7660947	7662725	-	104	Promoter
1_7663709_7664218	AT1G21830	AT1G21830	1	7660947	7662725	-	984	Promoter
1_7664910_7665246	AT1G21835	AT1G21835	1	7665664	7665936	+	418	Promoter
1_7692241_7692536	p24delta5	AT1G21900	1	7690802	7692459	-	77	Promoter
1_7699280_7699527	DREB26	AT1G21910	1	7696427	7697831	+	2853	Intergenic
1_7703120_7703523	AT1G21920	AT1G21920	1	7704173	7706254	-	2731	Intergenic
1_7706182_7706600	AT1G21920	AT1G21920	1	7704173	7706254	-	72	Promoter
1_7732307_7732662	PIP5K1	AT1G21980	1	7734661	7738772	+	1999	1to5kb
1_7739666_7739930	AT1G21990	AT1G21990	1	7740530	7742106	-	2176	Intergenic
1_7759201_7759747	AT1G22030	AT1G22030	1	7759077	7760929	-	1182	3UTR
1_7767762_7768271	AT1G22040	AT1G22040	1	7767924	7770216	+	162	Promoter
1_7771498_7771960	MUB6	AT1G22050	1	7771659	7773154	+	161	Promoter
1_7781385_7781726	AT1G22060	AT1G22060	1	7773063	7781539	-	154	Promoter
1_7788173_7788784	TGA3	AT1G22070	1	7789133	7792139	+	349	Promoter
1_7789212_7789590	TGA3	AT1G22070	1	7789133	7792139	+	79	Intronexonboundary
1_7800535_7801529	AT1G22110	AT1G22110	1	7800507	7804061	-	2532	3UTR
1_7802438_7802797	AT1G22110	AT1G22110	1	7800507	7804061	-	1264	Intronexonboundary
1_7821856_7822371	SULTR1%3B3	AT1G22150	1	7817609	7821576	+	4247	Intergenic
1_7822881_7823261	AT1G22160	AT1G22160	1	7823066	7823971	+	185	Promoter
1_7824218_7825262	AT1G22160	AT1G22160	1	7823066	7823971	+	1152	Intergenic
1_7830326_7831054	AT1G22180	AT1G22180	1	7828326	7830424	-	98	Promoter
1_7832809_7833136	AT1G22180	AT1G22180	1	7828326	7830424	-	2385	1to5kb
1_7835730_7836058	AT1G22190	AT1G22190	1	7835781	7837411	+	51	Promoter
1_7837308_7837558	AT1G22200	AT1G22200	1	7837563	7840898	-	3340	Intergenic
1_7872635_7873038	ZYP1b	AT1G22275	1	7867067	7872715	+	5568	Intronexonboundary
1_7873452_7873809	PAPP2C	AT1G22280	1	7873867	7876018	+	58	Promoter
1_7883685_7884273	MBD8	AT1G22310	1	7881503	7883824	-	139	Promoter
1_7887614_7889395	AT1G22330	AT1G22330	1	7886323	7889534	+	1291	Intronexonboundary
1_7899817_7900220	UGT85A5	AT1G22370	1	7897915	7900335	-	115	5UTR
1_7901996_7902373	UGT85A3	AT1G22380	1	7900355	7902427	-	54	5UTR
1_7903065_7903380	UGT85A1	AT1G22400	1	7903660	7906969	-	3589	Intergenic
1_7904109_7904372	UGT85A1	AT1G22400	1	7903660	7906969	-	2597	Exon
1_7904937_7905247	UGT85A1	AT1G22400	1	7903660	7906969	-	1722	Intron
1_7907180_7907414	UGT85A1	AT1G22400	1	7903660	7906969	-	211	Promoter
1_7909463_7910061	AT1G22410	AT1G22410	1	7911843	7915004	+	1782	1to5kb
1_7910471_7910824	AT1G22410	AT1G22410	1	7911843	7915004	+	1019	1to5kb
1_7911890_7912231	AT1G22410	AT1G22410	1	7911843	7915004	+	47	5UTR
1_7913034_7914575	AT1G22410	AT1G22410	1	7911843	7915004	+	1191	Intronexonboundary
1_7934017_7934375	AT1G22480	AT1G22480	1	7933973	7935382	-	1007	3UTR
1_7962364_7962651	AT1G22540	AT1G22540	1	7963813	7966436	+	1162	1to5kb
1_7975321_7975714	AT1G22570	AT1G22570	1	7976424	7978810	-	3096	Intergenic
1_7980059_7980347	AT1G22570	AT1G22570	1	7976424	7978810	-	1249	1to5kb
1_7991002_7991710	AT1G22600	AT1G22600	1	7987141	7989217	-	1785	1to5kb
1_7993593_7994115	ATSAC1	AT1G22620	1	7994166	8002989	-	8874	Intergenic
1_7997628_7997864	AT1G22610	AT1G22610	1	7994262	7997588	+	3366	Intergenic
1_8005084_8006399	MYB3	AT1G22640	1	8006064	8007465	+	335	Promoter
1_8007167_8007403	MYB3	AT1G22640	1	8006064	8007465	+	1103	3UTR
1_8007790_8008207	MYB3	AT1G22640	1	8006064	8007465	+	1726	Intergenic
1_8008850_8009168	MYB3	AT1G22640	1	8006064	8007465	+	2786	Intergenic
1_8009430_8009726	MYB3	AT1G22640	1	8006064	8007465	+	3366	Intergenic
1_8010647_8010969	A/N-InvD	AT1G22650	1	8013353	8016150	-	5181	Intergenic
1_8016982_8017284	AT1G22660	AT1G22660	1	8017281	8021930	+	3	Promoter
1_8048944_8049806	AT1G22730	AT1G22730	1	8046073	8049039	+	2871	3UTR
1_8060643_8061372	GI	AT1G22770	1	8061751	8067790	+	379	Promoter
1_8067584_8067978	PFL	AT1G22780	1	8067864	8069356	+	114	Promoter
1_8075729_8075979	AT1G22830	AT1G22830	1	8075996	8079137	+	17	Promoter
1_8076535_8076814	AT1G22830	AT1G22830	1	8075996	8079137	+	539	5UTR
1_8082929_8083169	AT1G22860	AT1G22860	1	8083184	8089273	+	15	Promoter
1_8098179_8098940	AT1G22882	AT1G22882	1	8098392	8101464	+	213	Promoter
1_8104970_8105669	AT1G22910	AT1G22910	1	8104993	8108361	+	23	Promoter
1_8117047_8117656	AT1G22930	AT1G22930	1	8117286	8122151	+	239	Promoter
1_8127149_8127665	AT1G22950	AT1G22950	1	8125023	8127286	-	137	Promoter
1_8134687_8135221	CRF7	AT1G22985	1	8135180	8136034	-	813	3UTR
1_8135841_8136360	CRF7	AT1G22985	1	8135180	8136034	-	193	Promoter
1_8141031_8141288	HIPP22	AT1G22990	1	8139114	8140233	+	1917	Intergenic
1_8141569_8141939	AT1G23000	AT1G23000	1	8143227	8145174	+	1288	1to5kb
1_8142683_8143084	AT1G23000	AT1G23000	1	8143227	8145174	+	143	Promoter
1_8145310_8145590	AT1G23000	AT1G23000	1	8143227	8145174	+	2083	Intergenic
1_8145868_8146170	AT1G23000	AT1G23000	1	8143227	8145174	+	2641	Intergenic
1_8146474_8147897	LPR1	AT1G23010	1	8147118	8149891	+	644	Promoter
1_8149878_8150306	FRO3	AT1G23020	1	8149868	8153796	-	3490	Intronexonboundary
1_8152021_8152325	FRO3	AT1G23020	1	8149868	8153796	-	1471	Intronexonboundary
1_8153338_8153786	FRO3	AT1G23020	1	8149868	8153796	-	10	Intronexonboundary
1_8154786_8155312	FRO3	AT1G23020	1	8149868	8153796	-	990	Promoter
1_8155641_8156824	AT1G23030	AT1G23030	1	8156504	8159185	+	320	Promoter
1_8159280_8159603	AT1G23030	AT1G23030	1	8156504	8159185	+	2776	Intergenic
1_8167030_8167282	AT1G23040	AT1G23040	1	8164782	8166716	+	2248	Intergenic
1_8168112_8169103	AT1G23050	AT1G23050	1	8168443	8169267	+	331	Promoter
1_8175904_8176502	AT1G23070	AT1G23070	1	8173823	8175819	-	85	Promoter
1_8176739_8177181	AT1G23070	AT1G23070	1	8173823	8175819	-	920	Promoter
1_8181433_8181695	PIN7	AT1G23080	1	8180189	8183650	-	1955	Intronexonboundary
1_8183397_8183652	PIN7	AT1G23080	1	8180189	8183650	-	2	Promoter
1_8187968_8188238	AST91	AT1G23090	1	8184925	8189234	-	996	Intronexonboundary
1_8188959_8189312	AST91	AT1G23090	1	8184925	8189234	-	78	Promoter
1_8192562_8192815	AT1G23100	AT1G23100	1	8195776	8196475	+	2961	1to5kb
1_8193316_8194105	AT1G23100	AT1G23100	1	8195776	8196475	+	1671	1to5kb
1_8198216_8198768	AT1G23110	AT1G23110	1	8196447	8198331	-	115	Promoter
1_8211286_8211798	AT1G23160	AT1G23160	1	8209226	8211486	+	2060	3UTR
1_8241961_8242192	GH9B6	AT1G23210	1	8240145	8242261	+	1816	3UTR
1_8244353_8244658	AT1G23220	AT1G23220	1	8242369	8244403	+	1984	3UTR
1_8307142_8307682	AT1G23390	AT1G23390	1	8308965	8310916	-	3234	Intergenic
1_8349769_8350878	SRO2	AT1G23550	1	8350728	8352791	+	150	Promoter
1_8384825_8385321	AT1G23710	AT1G23710	1	8385188	8386522	+	133	Promoter
1_8386716_8387025	AT1G23710	AT1G23710	1	8385188	8386522	+	1528	Intron
1_8416384_8416722	AT1G23810	AT1G23810	1	8417495	8418566	+	773	Promoter
1_8420040_8420430	SPDS1	AT1G23820	1	8420265	8422985	+	165	Promoter
1_8429882_8430111	RSZ21	AT1G23860	1	8427257	8429498	-	384	Promoter
1_8431985_8432411	TPS9	AT1G23870	1	8432179	8435656	+	194	Promoter
1_8484254_8484497	AT1G23980	AT1G23980	1	8484703	8486002	-	1505	Intergenic
1_8485945_8486358	AT1G23980	AT1G23980	1	8484703	8486002	-	57	Promoter
1_8493194_8493428	AT1G24000	AT1G24000	1	8495908	8496566	-	3138	Intergenic
1_8517292_8517592	CSLA10	AT1G24070	1	8516166	8519984	-	2392	Intronexonboundary
1_8519889_8520209	CSLA10	AT1G24070	1	8516166	8519984	-	95	Promoter
1_8523075_8523308	AT1G24095	AT1G24095	1	8523225	8524929	+	83	Promoter
1_8558895_8559222	LGT9	AT1G24170	1	8557215	8559066	-	156	Promoter
1_8560181_8560586	IAR4	AT1G24180	1	8560420	8563502	-	2916	3UTR
1_8595988_8597439	SEP3	AT1G24260	1	8593536	8596123	-	135	Promoter
1_8598458_8599031	AT1G24265	AT1G24265	1	8600391	8603913	+	1360	1to5kb
1_8603695_8603949	AT1G24265	AT1G24265	1	8600391	8603913	+	3304	3UTR
1_8607328_8607644	AT1G24267	AT1G24267	1	8604022	8607484	-	156	Promoter
1_8630738_8631333	AT1G24330	AT1G24330	1	8631206	8635055	+	127	Promoter
1_8661698_8662116	AT1G24440	AT1G24440	1	8661838	8664007	+	140	Promoter
1_8687937_8688343	AT1G24510	AT1G24510	1	8685271	8688247	-	96	Promoter
1_8692406_8693363	None	AT1G24530	1	8692630	8694705	+	224	Promoter
1_8694139_8694652	None	AT1G24530	1	8692630	8694705	+	1509	3UTR
1_8697406_8697700	CYP86C1	AT1G24540	1	8699650	8701458	+	1950	1to5kb
1_8709787_8710045	AT1G24570	AT1G24570	1	8706800	8709782	+	2987	Intergenic
1_8726988_8727418	ZFP7	AT1G24625	1	8725789	8727212	-	206	Promoter
1_8727819_8728672	ZFP7	AT1G24625	1	8725789	8727212	-	607	Promoter
1_8839378_8840774	ASB1	AT1G25220	1	8836835	8839609	-	231	Promoter
1_8842953_8843192	AT1G25230	AT1G25230	1	8840203	8842445	-	508	Promoter
1_8859143_8859517	UMAMIT24	AT1G25270	1	8857726	8859909	+	1417	Intronexonboundary
1_8860288_8860687	AT1G25275	AT1G25275	1	8860527	8861522	+	160	Promoter
1_8863763_8864104	TLP10	AT1G25280	1	8863768	8866894	+	5	Promoter
1_8866227_8866519	TLP10	AT1G25280	1	8863768	8866894	+	2459	Exon
1_8882166_8882419	CES	AT1G25330	1	8880267	8882100	-	66	Promoter
1_8883163_8883476	CES	AT1G25330	1	8880267	8882100	-	1063	1to5kb
1_8898948_8899268	AT1G25370	AT1G25370	1	8897564	8899111	-	157	Promoter
1_8912190_8912484	AT1G25400	AT1G25400	1	8911096	8912822	-	338	Intronexonboundary
1_8918875_8919102	AT1G25422	AT1G25422	1	8918789	8919892	+	86	5UTR
1_8924015_8924436	CLE43	AT1G25425	1	8922416	8923879	+	1599	Intronexonboundary
1_8925112_8925625	CLE43	AT1G25425	1	8922416	8923879	+	2696	Intergenic
1_8935092_8935904	BBX15	AT1G25440	1	8933716	8935544	-	360	Promoter
1_8938056_8938379	KCS5	AT1G25450	1	8938387	8940613	-	2234	Intergenic
1_8940287_8941149	KCS5	AT1G25450	1	8938387	8940613	-	326	Promoter
1_8947758_8948134	AT1G25480	AT1G25480	1	8948232	8951031	+	98	Promoter
1_8958962_8959242	AT1G25510	AT1G25510	1	8959087	8961183	-	1941	3UTR
1_8974643_8975186	PFT1	AT1G25540	1	8969065	8974815	-	172	Promoter
1_8975685_8975972	AT1G25550	AT1G25550	1	8976326	8978305	+	354	Promoter
1_8981801_8982181	TEM1	AT1G25560	1	8981556	8983314	-	1133	3UTR
1_8982896_8983306	TEM1	AT1G25560	1	8981556	8983314	-	8	5UTR
1_8983699_8984165	TEM1	AT1G25560	1	8981556	8983314	-	385	Promoter
1_8985446_8986890	TEM1	AT1G25560	1	8981556	8983314	-	2132	1to5kb
1_8995503_8996695	SOG1	AT1G25580	1	8996714	8999917	-	3222	Intergenic
1_9024273_9024792	DCP5	AT1G26110	1	9024341	9027955	-	3163	Intronexonboundary
1_9068070_9068808	SOFL1	AT1G26210	1	9067039	9068207	+	1031	Intronexonboundary
1_9069129_9069720	SOFL1	AT1G26210	1	9067039	9068207	+	2090	Intronexonboundary
1_9092363_9092796	AT1G26270	AT1G26270	1	9089469	9092560	-	197	Promoter
1_9099626_9099946	CAL	AT1G26310	1	9099994	9103644	-	3698	Intergenic
1_9124831_9125133	AT1G26370	AT1G26370	1	9121443	9125578	-	445	Intronexonboundary
1_9125377_9125809	AT1G26370	AT1G26370	1	9121443	9125578	-	201	Promoter
1_9132544_9132854	AT1G26400	AT1G26400	1	9133291	9134874	-	2020	Intergenic
1_9158074_9158339	GRF12	AT1G26480	1	9156279	9158093	-	19	Promoter
1_9178247_9178548	BGLU40	AT1G26560	1	9178212	9181967	+	35	5UTR
1_9178893_9179392	BGLU40	AT1G26560	1	9178212	9181967	+	681	Intronexonboundary
1_9188748_9189209	AT1G26590	AT1G26590	1	9188945	9190896	+	197	Promoter
1_9205660_9205946	FBR12	AT1G26630	1	9205800	9207417	+	140	Promoter
1_9209752_9210071	AT1G26650	AT1G26650	1	9210051	9211588	+	20	Promoter
1_9237414_9237658	AT1G26720	AT1G26720	1	9234099	9234939	-	2475	1to5kb
1_9253168_9253476	AT1G26762	AT1G26762	1	9253599	9254167	+	123	Promoter
1_9257185_9257879	EXPA10	AT1G26770	1	9259432	9261313	+	1553	1to5kb
1_9258343_9258813	EXPA10	AT1G26770	1	9259432	9261313	+	619	Promoter
1_9259183_9259667	EXPA10	AT1G26770	1	9259432	9261313	+	235	Promoter
1_9260740_9260982	EXPA10	AT1G26770	1	9259432	9261313	+	1308	3UTR
1_9298450_9298820	ORC6	AT1G26840	1	9298670	9300800	+	150	Promoter
1_9321364_9321625	RPL10B	AT1G26910	1	9321650	9323028	+	25	Promoter
1_9324914_9325454	RPL10B	AT1G26910	1	9321650	9323028	+	3264	Intronexonboundary
1_9325956_9326206	RPL10B	AT1G26910	1	9321650	9323028	+	4306	Intergenic
1_9327893_9329328	AT1G26920	AT1G26920	1	9329493	9330612	+	165	Promoter
1_9332147_9332696	AT1G26921	AT1G26921	1	9330944	9331201	-	946	Promoter
1_9339850_9340217	AT1G26930	AT1G26930	1	9336057	9337938	-	1912	1to5kb
1_9342237_9343075	AT1G26940	AT1G26940	1	9343112	9345323	+	37	Promoter
1_9350073_9350393	KDR	AT1G26945	1	9351160	9352833	+	767	Promoter
1_9351080_9351386	KDR	AT1G26945	1	9351160	9352833	+	80	Promoter
1_9353355_9354038	KDR	AT1G26945	1	9351160	9352833	+	2195	Intergenic
1_9354896_9355152	AtHB23	AT1G26960	1	9355827	9357502	+	675	Promoter
1_9373935_9374190	AT1G27000	AT1G27000	1	9373885	9376828	+	50	Intronexonboundary
1_9403806_9404238	AT1G27090	AT1G27090	1	9403753	9406369	-	2131	3UTR
1_9407632_9407998	AT1G27100	AT1G27100	1	9407085	9411368	-	3370	Intronexonboundary
1_9424956_9425431	GSTU13	AT1G27130	1	9425280	9426897	+	151	Promoter
1_9448678_9449668	AT1G27200	AT1G27200	1	9449338	9451768	-	2100	3UTR
1_9451762_9452178	AT1G27200	AT1G27200	1	9449338	9451768	-	6	Promoter
1_9453175_9453650	AT1G27200	AT1G27200	1	9449338	9451768	-	1407	1to5kb
1_9454149_9455255	AT1G27210	AT1G27210	1	9455277	9458176	-	2921	Intergenic
1_9460802_9461178	AT1G27210	AT1G27210	1	9455277	9458176	-	2626	1to5kb
1_9462238_9462873	AT1G27220	AT1G27220	1	9463806	9465444	+	933	Promoter
1_9481131_9481840	AT1G27290	AT1G27290	1	9481405	9482992	+	274	Promoter
1_9483041_9483310	AT1G27290	AT1G27290	1	9481405	9482992	+	1636	Intergenic
1_9486311_9487096	HK3	AT1G27320	1	9486889	9492632	+	207	Promoter
1_9492616_9493130	HK3	AT1G27320	1	9486889	9492632	+	5727	3UTR
1_9495326_9495623	LCR	AT1G27340	1	9495344	9498085	+	18	Promoter
1_9499209_9499712	AT1G27350	AT1G27350	1	9498000	9499639	-	73	Promoter
1_9501341_9501663	SPL11	AT1G27360	1	9500892	9504023	+	449	5UTR
1_9507199_9508342	SPL10	AT1G27370	1	9505112	9508542	-	200	5UTR
1_9510041_9510421	AT1G27385	AT1G27385	1	9510475	9512971	-	2550	Intergenic
1_9514741_9515135	AT1G27400	AT1G27400	1	9515114	9517070	+	21	Promoter
1_9527075_9528032	AT1G27430	AT1G27430	1	9520825	9527280	-	205	Promoter
1_9558366_9558624	AT1G27520	AT1G27520	1	9558562	9562485	+	62	Promoter
1_9567718_9568004	AT1G27540	AT1G27540	1	9565913	9567906	-	98	Promoter
1_9696372_9696829	ATCSA-1	AT1G27840	1	9693008	9696546	-	174	Promoter
1_9708498_9708912	AT1G27880	AT1G27880	1	9708861	9714366	+	51	Promoter
1_9724487_9724879	PUB45	AT1G27910	1	9720733	9724800	-	79	Promoter
1_9725816_9726344	MAP65-8	AT1G27920	1	9726655	9729848	+	311	Promoter
1_9730066_9730381	MAP65-8	AT1G27920	1	9726655	9729848	+	3411	Intergenic
1_9731318_9731587	AT1G27930	AT1G27930	1	9730959	9733000	-	1413	3UTR
1_9732380_9732651	AT1G27930	AT1G27930	1	9730959	9733000	-	349	5UTR
1_9738211_9738445	ABCB13	AT1G27940	1	9733430	9738236	-	25	Promoter
1_9739324_9739667	LTPG1	AT1G27950	1	9740508	9742159	+	841	Promoter
1_9777739_9779316	BBX13	AT1G28050	1	9775522	9778043	-	304	Promoter
1_9799733_9800323	AT1G28090	AT1G28090	1	9795718	9799116	+	4015	Intronexonboundary
1_9801687_9801973	AT1G28100	AT1G28100	1	9801082	9804394	+	605	Intronexonboundary
1_9815461_9815831	AT1G28120	AT1G28120	1	9812930	9815560	-	99	Promoter
1_9832496_9833152	AT1G28140	AT1G28140	1	9831876	9834510	-	1358	Intronexonboundary
1_9867804_9868063	AT1G28240	AT1G28240	1	9868257	9872278	-	4215	Intergenic
1_9872022_9872328	AT1G28240	AT1G28240	1	9868257	9872278	-	50	Promoter
1_9873645_9874126	AT1G28250	AT1G28250	1	9874247	9875579	+	121	Promoter
1_9884681_9886407	RALFL4	AT1G28270	1	9882951	9884189	+	1730	Intergenic
1_9887268_9888051	AT1G28280	AT1G28280	1	9885400	9887478	-	210	Promoter
1_9888663_9889057	AGP31	AT1G28290	1	9889101	9891015	-	1958	Intergenic
1_9891058_9891358	AGP31	AT1G28290	1	9889101	9891015	-	43	Promoter
1_9924317_9924752	DEG15	AT1G28320	1	9920219	9924488	-	171	Promoter
1_9926718_9927063	DEG15	AT1G28320	1	9920219	9924488	-	2230	1to5kb
1_9933992_9934624	DYL1	AT1G28330	1	9933786	9935440	-	816	3UTR
1_9935061_9935680	DYL1	AT1G28330	1	9933786	9935440	-	240	Promoter
1_9979284_9979819	AT1G28410	AT1G28410	1	9976182	9979793	-	26	Promoter
1_9999754_10000186	HSL1	AT1G28440	1	9996713	10000455	+	3041	Intronexonboundary
1_10000433_10001999	HSL1	AT1G28440	1	9996713	10000455	+	3720	3UTR
1_10015012_10015317	SYP61	AT1G28490	1	10015856	10018047	+	539	Promoter
1_10018375_10018603	AT1G28500	AT1G28500	1	10018691	10020479	+	88	Promoter
1_10057243_10057742	AT1G28630	AT1G28630	1	10058456	10063460	-	5718	Intergenic
1_10077945_10078380	AT1G28680	AT1G28680	1	10078189	10079909	+	191	Promoter
1_10111631_10111861	NUDX15	AT1G28960	1	10109500	10111738	-	107	Promoter
1_10143578_10143974	AT1G29060	AT1G29060	1	10147605	10149780	+	3631	1to5kb
1_10147362_10147639	AT1G29060	AT1G29060	1	10147605	10149780	+	34	Promoter
1_10151721_10152391	AT1G29070	AT1G29070	1	10149791	10151407	+	1930	Intronexonboundary
1_10184494_10184877	AT1G29160	AT1G29160	1	10183390	10184512	-	18	Promoter
1_10212650_10212911	AT1G29220	AT1G29220	1	10210520	10212722	-	72	Promoter
1_10214518_10214987	CIPK18	AT1G29230	1	10214681	10216563	+	163	Promoter
1_10242936_10243311	AT1G29290	AT1G29290	1	10244453	10245874	+	1142	1to5kb
1_10249354_10249655	UNE1	AT1G29300	1	10247707	10249704	-	49	5UTR
1_10261039_10261869	ERD2	AT1G29330	1	10258248	10261232	-	193	Promoter
1_10263540_10264291	PUB17	AT1G29340	1	10264043	10266917	+	248	Promoter
1_10275757_10276029	AT1G29355	AT1G29355	1	10274048	10275539	+	1709	Intergenic
1_10289737_10290371	COR413IM1	AT1G29395	1	10288129	10289666	-	71	Promoter
1_10294297_10294835	ML5	AT1G29400	1	10289998	10294630	-	205	Promoter
1_10302014_10302244	AT1G29420	AT1G29420	1	10301377	10302099	-	85	Promoter
1_10303372_10303843	AT1G29430	AT1G29430	1	10302585	10303418	-	46	Promoter
1_10305261_10305686	AT1G29435	AT1G29435	1	10303890	10305584	+	1371	Intronexonboundary
1_10306264_10306692	AT1G29450	AT1G29450	1	10305553	10306595	-	97	Promoter
1_10306951_10307252	AT1G29460	AT1G29460	1	10307352	10308246	-	994	Intergenic
1_10308445_10308672	AT1G29465	AT1G29465	1	10308520	10309896	+	75	Promoter
1_10320486_10321475	AT1G29490	AT1G29490	1	10319732	10320402	+	754	Intergenic
1_10321784_10322423	SAUR68	AT1G29510	1	10322423	10323239	+	0	Promoter
1_10326585_10326837	AT1G29530	AT1G29530	1	10324745	10326848	-	11	Intronexonboundary
1_10353974_10354215	AT1G29630	AT1G29630	1	10349427	10353833	+	4547	Intergenic
1_10356449_10356816	AT1G29640	AT1G29640	1	10355638	10356482	-	33	Promoter
1_10363084_10363541	AT1G29640	AT1G29640	1	10355638	10356482	-	6602	Intergenic
1_10374718_10376577	AT1G29660	AT1G29660	1	10371675	10374005	+	3043	Intergenic
1_10387384_10387627	AT1G29700	AT1G29700	1	10384945	10387441	-	57	Promoter
1_10420379_10420796	RKF1	AT1G29750	1	10413853	10420774	-	22	Promoter
1_10456253_10456517	WRKY71	AT1G29860	1	10454433	10455874	+	1820	Intergenic
1_10462804_10463227	AT1G29880	AT1G29880	1	10459457	10462967	-	163	Promoter
1_10477663_10477933	CAB1	AT1G29930	1	10477885	10479114	+	48	Promoter
1_10489704_10490187	AT1G29950	AT1G29950	1	10491698	10494598	+	1511	1to5kb
1_10504294_10505402	AT1G29980	AT1G29980	1	10503239	10506189	-	787	Intronexonboundary
1_10505938_10506338	AT1G29980	AT1G29980	1	10503239	10506189	-	149	Promoter
1_10512351_10513127	nMAT1	AT1G30010	1	10513151	10516385	+	24	Promoter
1_10529891_10530129	GA2OX2	AT1G30040	1	10537457	10540044	+	7328	Intergenic
1_10535399_10535647	GA2OX2	AT1G30040	1	10537457	10540044	+	1810	1to5kb
1_10537442_10538018	GA2OX2	AT1G30040	1	10537457	10540044	+	15	Promoter
1_10548165_10548544	AT1G30070	AT1G30070	1	10546511	10548236	-	71	Promoter
1_10553414_10553825	AT1G30080	AT1G30080	1	10550855	10553295	-	119	Promoter
1_10562309_10562979	AT1G30090	AT1G30090	1	10559496	10561545	-	764	Promoter
1_10573063_10573377	NCED5	AT1G30100	1	10571310	10573365	+	1753	3UTR
1_10573964_10574871	NCED5	AT1G30100	1	10571310	10573365	+	2654	Intergenic
1_10580255_10580600	NUDX25	AT1G30110	1	10581735	10584152	+	1135	1to5kb
1_10581139_10581567	NUDX25	AT1G30110	1	10581735	10584152	+	168	Promoter
1_10586707_10587026	PDH-E1 BETA	AT1G30120	1	10584105	10586680	-	27	Promoter
1_10590563_10590800	AT1G30130	AT1G30130	1	10587471	10590209	+	3092	Intronexonboundary
1_10638590_10638937	eEF-1Bb1	AT1G30230	1	10638878	10640941	+	59	Promoter
1_10663736_10664268	AT1G30280	AT1G30280	1	10662608	10664668	-	400	Intronexonboundary
1_10664538_10664845	AT1G30280	AT1G30280	1	10662608	10664668	-	130	Promoter
1_10679846_10680192	AT1G30320	AT1G30320	1	10680079	10683137	+	113	Promoter
1_10684940_10685373	ARF6	AT1G30330	1	10685822	10690988	-	5615	Intergenic
1_10690745_10691157	ARF6	AT1G30330	1	10685822	10690988	-	169	Promoter
1_10694757_10694983	ARF6	AT1G30330	1	10685822	10690988	-	3769	1to5kb
1_10709376_10709731	AT1G30350	AT1G30350	1	10709999	10711667	-	1936	Intergenic
1_10712280_10712924	AT1G30350	AT1G30350	1	10709999	10711667	-	613	Promoter
1_10713536_10714563	ERD4	AT1G30360	1	10715482	10718997	+	919	Promoter
1_10715466_10715784	ERD4	AT1G30360	1	10715482	10718997	+	16	Promoter
1_10722124_10722402	PSAK	AT1G30380	1	10722183	10723247	+	59	Promoter
1_10727255_10728248	ABCC1	AT1G30400	1	10727317	10738092	+	62	Promoter
1_10757642_10757884	AT1G30440	AT1G30440	1	10758743	10762429	+	859	Promoter
1_10795036_10795376	PHV	AT1G30490	1	10796124	10801093	-	5717	Intergenic
1_10806402_10806699	NF-YA7	AT1G30500	1	10804450	10806428	-	26	Promoter
1_10809129_10809633	RFNR2	AT1G30510	1	10806930	10809188	-	59	Promoter
1_10827028_10827468	G3Pp3	AT1G30560	1	10824637	10826405	+	2391	Intergenic
1_10828256_10828501	HERK2	AT1G30570	1	10828373	10831656	+	117	Promoter
1_10854524_10854922	MUR4	AT1G30620	1	10854517	10858280	+	7	Intronexonboundary
1_10887289_10887620	AT1G30690	AT1G30690	1	10887607	10890407	+	13	Promoter
1_10925546_10925828	AT1G30780	AT1G30780	1	10923919	10926561	-	733	Intronexonboundary
1_10936534_10936815	JMJ18	AT1G30810	1	10936765	10942292	-	5477	3UTR
1_10942236_10942505	JMJ18	AT1G30810	1	10936765	10942292	-	56	Promoter
1_10956259_10956604	DIS2	AT1G30825	1	10960908	10963231	+	4304	1to5kb
1_11067611_11067929	AT1G31040	AT1G31040	1	11069510	11072564	-	4635	Intergenic
1_11109932_11110227	KUP10	AT1G31120	1	11104237	11108095	-	1837	1to5kb
1_11110727_11111029	KUP10	AT1G31120	1	11104237	11108095	-	2632	1to5kb
1_11112547_11113017	AT1G31130	AT1G31130	1	11114693	11116195	-	3178	Intergenic
1_11115802_11116347	AT1G31130	AT1G31130	1	11114693	11116195	-	152	Promoter
1_11119606_11119858	AT1G31150	AT1G31150	1	11119827	11122675	+	31	Promoter
1_11192638_11193027	AGO3	AT1G31290	1	11188120	11192585	+	4518	Intergenic
1_11193436_11193729	AT1G31300	AT1G31300	1	11193625	11196397	+	104	Promoter
1_11196381_11196692	AT1G31300	AT1G31300	1	11193625	11196397	+	2756	Intronexonboundary
1_11221212_11221867	KUF1	AT1G31350	1	11221267	11222827	-	960	3UTR
1_11222414_11222950	KUF1	AT1G31350	1	11221267	11222827	-	123	Promoter
1_11226273_11226657	KUF1	AT1G31350	1	11221267	11222827	-	3446	1to5kb
1_11231092_11231335	RECQL2	AT1G31360	1	11232318	11237594	+	983	Promoter
1_11426908_11427192	AT1G31840	AT1G31840	1	11423906	11426818	+	3002	Intergenic
1_11445059_11445921	BRX	AT1G31880	1	11445490	11450232	+	431	Promoter
1_11454896_11455174	AT1G31910	AT1G31910	1	11456802	11463896	+	1628	1to5kb
1_11472626_11473164	AT1G31940	AT1G31940	1	11470056	11471481	-	1145	1to5kb
1_11531964_11532695	PRK	AT1G32060	1	11532199	11534639	+	235	Promoter
1_11544620_11544888	AT1G32090	AT1G32090	1	11539993	11544166	-	454	Promoter
1_11573639_11574084	XTH30	AT1G32170	1	11575320	11578030	+	1236	1to5kb
1_11665973_11666240	NHL8	AT1G32340	1	11663008	11666120	-	120	Promoter
1_11671477_11671811	AT1G32360	AT1G32360	1	11672766	11675387	+	955	Promoter
1_11691305_11691565	TOM2A	AT1G32400	1	11689064	11691588	-	23	5UTR
1_11710058_11710383	PKp3	AT1G32440	1	11711944	11715162	+	1561	1to5kb
1_11737999_11738234	AT1G32460	AT1G32460	1	11738118	11739326	+	116	Promoter
1_11751841_11752311	ABCI7	AT1G32500	1	11749798	11752190	-	121	Promoter
1_11770612_11770864	LOL1	AT1G32540	1	11767485	11770049	+	3127	Intergenic
1_11771171_11771671	FdC2	AT1G32550	1	11771621	11774294	-	2623	3UTR
1_11800948_11801201	AT1G32630	AT1G32630	1	11797330	11801359	+	3618	3UTR
1_11820936_11821327	AT1G32690	AT1G32690	1	11820872	11821824	-	497	3UTR
1_11840675_11840945	AT1G32730	AT1G32730	1	11840910	11843308	+	35	Promoter
1_11927617_11928229	AT1G32910	AT1G32910	1	11925320	11927302	+	2297	Intronexonboundary
1_11928537_11928780	AT1G32920	AT1G32920	1	11928757	11929993	+	23	Promoter
1_11929482_11929832	AT1G32920	AT1G32920	1	11928757	11929993	+	725	3UTR
1_11930842_11931651	AT1G32928	AT1G32928	1	11931149	11931801	+	307	Promoter
1_11934548_11934943	AT1G32930	AT1G32930	1	11931842	11934759	-	184	Promoter
1_12046442_12046746	AT1G33230	AT1G33230	1	12046379	12050095	+	63	5UTR
1_12050701_12051822	GTL1	AT1G33240	1	12051361	12054753	-	2931	3UTR
1_12053644_12055439	GTL1	AT1G33240	1	12051361	12054753	-	686	Promoter
1_12055786_12056270	AT1G33250	AT1G33250	1	12057198	12059792	-	3522	Intergenic
1_12059502_12059851	AT1G33250	AT1G33250	1	12057198	12059792	-	59	Promoter
1_12123356_12123873	AT1G33420	AT1G33420	1	12120886	12123576	-	220	Promoter
1_12132223_12132502	AT1G33440	AT1G33440	1	12127389	12130444	-	1779	1to5kb
1_12144322_12144583	AT1G33470	AT1G33470	1	12144440	12147208	+	118	Promoter
1_12150462_12150900	AT1G33480	AT1G33480	1	12148515	12150617	-	155	Promoter
1_12152275_12152657	AT1G33500	AT1G33500	1	12152519	12154921	+	138	Promoter
1_12358868_12359179	OHP2	AT1G34000	1	12357910	12358966	-	98	Promoter
1_12429593_12430030	IP5PI	AT1G34120	1	12426700	12429714	+	2893	3UTR
1_12473536_12473915	EPF2	AT1G34245	1	12472868	12473974	+	668	3UTR
1_12582675_12582971	AT1G34420	AT1G34420	1	12584345	12587778	+	1374	1to5kb
1_12651033_12651298	EMB2756	AT1G34550	1	12646674	12652646	-	1348	Intron
1_12656413_12656750	AT1G34570	AT1G34570	1	12654927	12656605	-	145	Promoter
1_12712357_12712637	MYB93	AT1G34670	1	12709090	12710665	+	3267	Intergenic
1_12745660_12745933	GRF11	AT1G34760	1	12743722	12745748	-	88	Promoter
1_12867015_12867327	GF14 PHI	AT1G35160	1	12867081	12868890	+	66	Promoter
1_12889574_12889826	AT1G35190	AT1G35190	1	12890404	12892955	+	578	Promoter
1_12890354_12890625	AT1G35190	AT1G35190	1	12890404	12892955	+	50	Promoter
1_12935726_12936229	AT1G35255	AT1G35255	1	12935647	12936586	-	357	3UTR
1_13030064_13030362	AT1G35430	AT1G35430	1	13030553	13031375	-	1013	Intergenic
1_13030899_13031186	AT1G35430	AT1G35430	1	13030553	13031375	-	189	5UTR
1_13039544_13039886	FBH1	AT1G35460	1	13039660	13042159	+	116	Promoter
1_13070917_13071267	AT1G35510	AT1G35510	1	13071165	13074984	+	102	Promoter
1_13073718_13074379	AT1G35510	AT1G35510	1	13071165	13074984	+	2553	Intronexonboundary
1_13116832_13118112	AT1G35560	AT1G35560	1	13115824	13117235	-	403	Promoter
1_13125128_13125585	CINV1	AT1G35580	1	13122082	13125328	-	200	Promoter
1_13279066_13279455	AT1G35780	AT1G35780	1	13277259	13280387	-	932	5UTR
1_15607634_15607936	SKS6	AT1G41830	1	15603568	15607966	-	30	Intronexonboundary
1_15899999_15900266	AT1G42440	AT1G42440	1	15895197	15900105	-	106	Promoter
1_15925983_15926380	AT1G42470	AT1G42470	1	15926676	15935529	+	296	Promoter
1_15935728_15936187	AT1G42480	AT1G42480	1	15936156	15938974	+	31	Promoter
1_16137317_16137691	BZIP60	AT1G42990	1	16135723	16137463	-	146	Promoter
1_16478061_16478304	AT1G43690	AT1G43690	1	16478159	16482859	+	98	Promoter
1_16765911_16766180	AAP5	AT1G44100	1	16764392	16767685	-	1505	Intronexonboundary
1_16767243_16767657	AAP5	AT1G44100	1	16764392	16767685	-	28	5UTR
1_16800110_16800340	ALDH3H1	AT1G44170	1	16796400	16800321	-	19	Promoter
1_16800917_16801284	ALDH3H1	AT1G44170	1	16796400	16800321	-	596	Promoter
1_16837078_16837412	ILL6	AT1G44350	1	16834210	16838562	-	1150	Intronexonboundary
1_16866488_16866955	AT1G44542	AT1G44542	1	16864831	16866787	-	168	Promoter
1_16868002_16868431	AT1G44542	AT1G44542	1	16864831	16866787	-	1215	1to5kb
1_16887925_16888310	AT1G44740	AT1G44740	1	16887217	16889155	+	708	Intronexonboundary
1_16896926_16897181	AT1G44760	AT1G44760	1	16896679	16898645	-	1464	Intronexonboundary
1_16923340_16923581	AT1G44810	AT1G44810	1	16923440	16924821	+	100	Promoter
1_16925173_16925441	AT1G44810	AT1G44810	1	16923440	16924821	+	1733	Intergenic
1_16970030_16970282	MCM2	AT1G44900	1	16970214	16974753	+	68	Promoter
1_17031102_17031441	ATUBC2-1	AT1G45050	1	17031211	17033269	+	109	Promoter
1_17062560_17062788	BGAL5	AT1G45130	1	17065111	17069269	+	2323	1to5kb
1_17063603_17063846	BGAL5	AT1G45130	1	17065111	17069269	+	1265	1to5kb
1_17095506_17095778	AT1G45170	AT1G45170	1	17095980	17098041	-	2263	Intergenic
1_17168945_17169353	AT1G45230	AT1G45230	1	17169436	17171472	-	2119	Intergenic
1_17266304_17266577	RAP2.1	AT1G46768	1	17265586	17266824	-	247	5UTR
1_17282791_17283588	RD21A	AT1G47128	1	17282749	17285749	-	2161	Intronexonboundary
1_17285790_17286054	RD21A	AT1G47128	1	17282749	17285749	-	41	Promoter
1_17286311_17286741	RD21A	AT1G47128	1	17282749	17285749	-	562	Promoter
1_17288264_17288707	RD21A	AT1G47128	1	17282749	17285749	-	2515	1to5kb
1_17291000_17291336	AT1G47130	AT1G47130	1	17291755	17292755	+	419	Promoter
1_17296428_17296739	WPP2	AT1G47200	1	17297831	17298829	-	2090	Intergenic
1_17300759_17300987	CYCA3%3B2	AT1G47210	1	17300691	17302914	+	68	5UTR
1_17305784_17306201	CYCA3%3B4	AT1G47230	1	17306574	17308848	+	373	Promoter
1_17323371_17323600	GAMMA CA2	AT1G47260	1	17319551	17323484	-	113	Promoter
1_17350853_17351151	AT1G47330	AT1G47330	1	17351018	17353875	+	133	Promoter
1_17356374_17356671	AT1G47340	AT1G47340	1	17353847	17356564	-	107	Promoter
1_17424537_17424868	RBP47C	AT1G47490	1	17424473	17427475	+	64	5UTR
1_17432365_17432797	AT1G47497	AT1G47497	1	17431009	17432401	-	36	Promoter
1_17451248_17451722	AT1G47530	AT1G47530	1	17451553	17454461	+	169	Promoter
1_17456894_17457154	SEC3A	AT1G47550	1	17456987	17465195	+	93	Promoter
1_17566449_17566719	AT1G47740	AT1G47740	1	17566511	17569297	+	62	Promoter
1_17567134_17567484	AT1G47740	AT1G47740	1	17566511	17569297	+	623	5UTR
1_17634546_17634787	ATE2F2	AT1G47870	1	17634697	17637809	+	90	Promoter
1_17651022_17652032	AT1G47900	AT1G47900	1	17647144	17651791	-	241	Promoter
1_17686806_17687132	AT1G47970	AT1G47970	1	17686990	17688859	+	142	Promoter
1_17688535_17688867	AT1G47970	AT1G47970	1	17686990	17688859	+	1545	3UTR
1_17715305_17715717	PMEI1	AT1G48020	1	17716051	17716808	-	1091	Intergenic
1_17723003_17723374	KU80	AT1G48050	1	17723382	17727243	+	8	Promoter
1_17820226_17820481	CIPK17	AT1G48260	1	17813886	17817441	-	2785	1to5kb
1_17855555_17856074	DHNAT1	AT1G48320	1	17854813	17855715	-	160	Promoter
1_17859217_17859450	AT1G48325	AT1G48325	1	17857258	17857722	+	1959	Intergenic
1_17861730_17862276	AT1G48330	AT1G48330	1	17863660	17864558	+	1384	1to5kb
1_17862685_17863027	AT1G48330	AT1G48330	1	17863660	17864558	+	633	Promoter
1_17863608_17863886	AT1G48330	AT1G48330	1	17863660	17864558	+	52	Promoter
1_17865115_17865551	AT1G48330	AT1G48330	1	17863660	17864558	+	1455	Intergenic
1_17874013_17874533	YSL8	AT1G48370	1	17874436	17877462	+	97	Promoter
1_17892435_17892667	AGO1	AT1G48410	1	17885633	17892632	-	35	Promoter
1_17906698_17907001	AT1G48430	AT1G48430	1	17902632	17906873	-	128	Promoter
1_17910932_17911518	AT1G48460	AT1G48460	1	17910779	17913344	+	153	Intronexonboundary
1_17918195_17918512	RKL1	AT1G48480	1	17918207	17921116	+	12	Promoter
1_17920893_17921868	AT1G48490	AT1G48490	1	17921900	17928954	-	7086	Intergenic
1_17960884_17961955	AT1G48580	AT1G48580	1	17957942	17960916	-	32	Promoter
1_17962476_17962818	AT1G48590	AT1G48590	1	17962520	17964465	+	44	Promoter
1_17976160_17976628	HON5	AT1G48620	1	17973642	17976663	-	35	Intronexonboundary
1_17983286_17983616	PEX3	AT1G48635	1	17983646	17986292	+	30	Promoter
1_18040014_18040445	AT1G48770	AT1G48770	1	18040129	18041447	+	115	Promoter
1_18067949_18068438	EMB1144	AT1G48850	1	18064905	18068154	-	205	Promoter
1_18176034_18176561	BBX17	AT1G49130	1	18174373	18176389	-	172	Promoter
1_18182351_18183216	AT1G49170	AT1G49170	1	18183184	18184583	-	1367	3UTR
1_18197557_18198040	AT1G49200	AT1G49200	1	18198227	18199168	+	187	Promoter
1_18212992_18213380	AT1G49225	AT1G49225	1	18206312	18211390	-	1602	1to5kb
1_18282704_18283000	emb1129	AT1G49400	1	18282968	18284202	+	32	Promoter
1_18287831_18288252	AT1G49420	AT1G49420	1	18287859	18288650	-	398	Intronexonboundary
1_18296608_18296991	LACS2	AT1G49430	1	18290942	18295905	+	5666	Intergenic
1_18305352_18305650	AT1G49450	AT1G49450	1	18305445	18307557	+	93	Promoter
1_18316414_18316837	RTV1	AT1G49480	1	18314117	18316861	-	24	5UTR
1_18318569_18319471	AT1G49490	AT1G49490	1	18317259	18320210	-	739	Exon
1_18328731_18329690	emb1273	AT1G49510	1	18326846	18328714	+	1885	Intergenic
1_18342141_18342409	AT1G49560	AT1G49560	1	18342451	18344452	+	42	Promoter
1_18344234_18344908	AT1G49560	AT1G49560	1	18342451	18344452	+	1783	3UTR
1_18360033_18360581	RBP47A	AT1G49600	1	18356799	18360447	-	134	Promoter
1_18364430_18364928	ICK5	AT1G49620	1	18365336	18366744	-	1816	Intergenic
1_18365168_18365757	ICK5	AT1G49620	1	18365336	18366744	-	987	3UTR
1_18366824_18367337	ICK5	AT1G49620	1	18365336	18366744	-	80	Promoter
1_18379752_18380099	CXE5	AT1G49660	1	18378634	18379901	-	149	Promoter
1_18393637_18394003	FUT12	AT1G49710	1	18391273	18394030	-	27	5UTR
1_18399943_18400273	ABF1	AT1G49720	1	18400003	18402628	+	60	Promoter
1_18406249_18407575	AT1G49740	AT1G49740	1	18407400	18410022	+	175	Promoter
1_18410620_18410857	AT1G49750	AT1G49750	1	18410857	18413016	-	2159	3UTR
1_18414469_18414867	AT1G49750	AT1G49750	1	18410857	18413016	-	1453	1to5kb
1_18416297_18416536	PAB8	AT1G49760	1	18416474	18420111	+	62	Promoter
1_18428120_18428791	PUB26	AT1G49780	1	18428788	18430497	-	1706	3UTR
1_18430067_18430969	PUB26	AT1G49780	1	18428788	18430497	-	430	Promoter
1_18432870_18433116	AT1G49790	AT1G49790	1	18435351	18437131	-	4015	Intergenic
1_18438077_18438362	AT1G49800	AT1G49800	1	18438012	18439115	-	753	3UTR
1_18454599_18455032	AT1G49840	AT1G49840	1	18451746	18454463	+	2853	Intergenic
1_18484380_18484643	AT1G49920	AT1G49920	1	18481584	18484393	-	13	Promoter
1_18521442_18522119	TOR	AT1G50030	1	18522248	18539995	-	17876	Intergenic
1_18541923_18542232	AT1G50040	AT1G50040	1	18542061	18544034	+	138	Promoter
1_18543662_18544256	AT1G50040	AT1G50040	1	18542061	18544034	+	1601	3UTR
1_18581763_18582188	AT1G50160	AT1G50160	1	18581429	18581650	+	334	Intergenic
1_18590650_18591054	ALATS	AT1G50200	1	18591194	18598569	-	7515	Intergenic
1_18626101_18626545	AT1G50280	AT1G50280	1	18623698	18626441	-	104	Promoter
1_18658490_18658781	FYPP1	AT1G50370	1	18658508	18662052	+	18	Promoter
1_18680796_18681120	SCL3	AT1G50420	1	18677694	18680300	-	496	Promoter
1_18690770_18691159	AT1G50450	AT1G50450	1	18687785	18690503	-	267	Promoter
1_18691488_18691799	AT1G50450	AT1G50450	1	18687785	18690503	-	985	Promoter
1_18692325_18692595	HKL1	AT1G50460	1	18693644	18697709	+	1049	1to5kb
1_18693431_18693826	HKL1	AT1G50460	1	18693644	18697709	+	182	Promoter
1_18739315_18739598	SCL5	AT1G50600	1	18737063	18739649	-	51	Intronexonboundary
1_18748000_18748546	AT1G50620	AT1G50620	1	18748241	18751338	+	241	Promoter
1_18756386_18756710	ERF3	AT1G50640	1	18756972	18758708	-	1998	Intergenic
1_18758294_18758726	ERF3	AT1G50640	1	18756972	18758708	-	18	Promoter
1_18837995_18838347	AT1G50830	AT1G50830	1	18835271	18838029	-	34	Promoter
1_18838697_18839017	POLGAMMA2	AT1G50840	1	18839047	18844577	+	30	Promoter
1_18926600_18926843	HTA10	AT1G51060	1	18926811	18927746	+	32	Promoter
1_18942408_18942676	AT1G51130	AT1G51130	1	18939194	18941719	-	689	Promoter
1_18945791_18946074	FBH3	AT1G51140	1	18943447	18945812	-	21	Promoter
1_18951817_18952112	AT1G51160	AT1G51160	1	18949532	18951891	+	2285	3UTR
1_18984300_18984550	AT1G51200	AT1G51200	1	18984281	18986653	+	19	5UTR
1_19031391_19031661	AT1G51340	AT1G51340	1	19030998	19035121	+	393	Intronexonboundary
1_19052510_19052806	AT1G51400	AT1G51400	1	19052023	19052582	-	72	Promoter
1_19070651_19071235	AT1G51440	AT1G51440	1	19070798	19072753	+	147	Promoter
1_19074287_19074636	TRO	AT1G51450	1	19074328	19076545	+	41	Promoter
1_19081319_19082138	ABCG13	AT1G51460	1	19076838	19081451	-	132	Promoter
1_19083607_19083852	ABCG13	AT1G51460	1	19076838	19081451	-	2156	1to5kb
1_19101186_19101420	ABCG12	AT1G51500	1	19097712	19101265	-	79	Promoter
1_19105374_19106213	Y14	AT1G51510	1	19102791	19104933	-	441	Promoter
1_19119318_19119606	AT1G51560	AT1G51560	1	19119606	19122038	-	2432	3UTR
1_19124888_19125310	AT1G51570	AT1G51570	1	19122161	19125375	-	65	5UTR
1_19152364_19152659	ATEXO70G2	AT1G51640	1	19149761	19152288	-	76	Promoter
1_19155975_19156639	AT1G51670	AT1G51670	1	19156135	19158769	+	160	Promoter
1_19162160_19162956	4CL1	AT1G51680	1	19158746	19161737	-	423	Promoter
1_19163629_19164490	B ALPHA	AT1G51690	1	19163843	19170449	+	214	Promoter
1_19174645_19175676	UBP6	AT1G51710	1	19175609	19180195	-	4519	3UTR
1_19180821_19181072	AT1G51720	AT1G51720	1	19180744	19186532	+	77	Intronexonboundary
1_19212013_19212403	AT1G51790	AT1G51790	1	19206615	19211971	-	42	Promoter
1_19299847_19300262	LYK3	AT1G51940	1	19295820	19299169	-	678	Promoter
1_19302610_19303597	IAA18	AT1G51950	1	19305081	19307518	+	1484	1to5kb
1_19314158_19314423	ABO5	AT1G51965	1	19311466	19314195	-	37	Promoter
1_19320440_19320683	AT1G51980	AT1G51980	1	19323055	19326918	-	6235	Intergenic
1_19348878_19349556	MBP2	AT1G52030	1	19345871	19349088	-	210	Promoter
1_19414669_19414985	ATHB-15	AT1G52150	1	19409688	19414764	-	95	Promoter
1_19433028_19433558	AT1G52190	AT1G52190	1	19434480	19439031	+	922	Promoter
1_19469811_19470146	PERK15	AT1G52290	1	19469820	19472582	-	2436	3UTR
1_19473385_19473616	PERK15	AT1G52290	1	19469820	19472582	-	803	Promoter
1_19578503_19578820	AT1G52565	AT1G52565	1	19579839	19580977	-	2157	Intergenic
1_19580622_19580855	AT1G52565	AT1G52565	1	19579839	19580977	-	122	5UTR
1_19581779_19582092	AT1G52565	AT1G52565	1	19579839	19580977	-	802	Promoter
1_19601725_19602239	AT1G52618	AT1G52618	1	19603147	19603743	+	908	Promoter
1_19619464_19619836	LEA7	AT1G52690	1	19619724	19621534	+	112	Promoter
1_19642449_19642695	AT1G52730	AT1G52730	1	19642452	19645211	+	3	Promoter
1_19650397_19650701	LysoPL2	AT1G52760	1	19651172	19652825	+	471	Promoter
1_19681925_19682472	AT1G52857	AT1G52857	1	19681209	19681787	-	138	Promoter
1_19683915_19684235	AT1G52855	AT1G52855	1	19682773	19683565	-	350	Promoter
1_19690814_19691340	NAM	AT1G52880	1	19688708	19690589	-	225	Promoter
1_19694490_19695255	NAC019	AT1G52890	1	19696923	19698482	-	3227	Intergenic
1_19697231_19697472	NAC019	AT1G52890	1	19696923	19698482	-	1010	3UTR
1_19698047_19699827	NAC019	AT1G52890	1	19696923	19698482	-	435	Promoter
1_19764185_19764541	AT1G53040	AT1G53040	1	19764245	19767507	-	2966	3UTR
1_19782597_19783308	SPA4	AT1G53090	1	19783185	19786902	+	123	Promoter
1_19790175_19790435	AT1G53110	AT1G53110	1	19790142	19792589	+	33	5UTR
1_19813573_19813914	ATMAP4K ALPHA1	AT1G53165	1	19813790	19819564	+	124	Promoter
1_19821310_19821694	ERF8	AT1G53170	1	19821337	19822399	-	705	3UTR
1_19836774_19837173	AT1G53190	AT1G53190	1	19837110	19840370	+	63	Promoter
1_19843237_19844050	AT1G53200	AT1G53200	1	19840368	19843499	-	262	Promoter
1_19844480_19844738	AT1G53210	AT1G53210	1	19844450	19847856	+	30	5UTR
1_19849103_19849392	TCP3	AT1G53230	1	19849788	19851725	-	2333	Intergenic
1_19873514_19873800	AT1G53290	AT1G53290	1	19871116	19873727	+	2398	3UTR
1_19878679_19879191	TTL1	AT1G53300	1	19879405	19882895	+	214	Promoter
1_19883468_19884020	PPC1	AT1G53310	1	19883935	19888413	-	4393	3UTR
1_19893425_19893654	TLP7	AT1G53320	1	19890935	19893504	-	79	Promoter
1_19913202_19913459	AT1G53380	AT1G53380	1	19912990	19916686	-	3227	3UTR
1_19915933_19917002	AT1G53380	AT1G53380	1	19912990	19916686	-	316	Promoter
1_19924634_19924999	AT1G53400	AT1G53400	1	19924660	19926631	+	26	Promoter
1_19935559_19936141	AT1G53430	AT1G53430	1	19934987	19941185	+	572	Intronexonboundary
1_19946229_19946815	AT1G53440	AT1G53440	1	19945869	19951562	+	360	Intronexonboundary
1_19956740_19957140	AT1G53460	AT1G53460	1	19954390	19956915	-	175	Promoter
1_19957487_19958496	MSL4	AT1G53470	1	19958380	19961827	+	116	Promoter
1_19993384_19993619	GLY3	AT1G53580	1	19991271	19993458	-	74	Promoter
1_20028711_20028969	AT1G53645	AT1G53645	1	20026016	20028756	-	45	Promoter
1_20044199_20044440	AT1G53690	AT1G53690	1	20042452	20043626	-	573	Promoter
1_20046532_20047010	WAG1	AT1G53700	1	20048434	20050294	+	1424	1to5kb
1_20049718_20050168	WAG1	AT1G53700	1	20048434	20050294	+	1284	3UTR
1_20059873_20060102	CYP59	AT1G53720	1	20056526	20059803	+	3347	Intergenic
1_20061146_20061622	SRF6	AT1G53730	1	20061405	20065713	+	217	Promoter
1_20068791_20069164	AT1G53760	AT1G53760	1	20068965	20071171	-	2007	3UTR
1_20081389_20081654	AT1G53800	AT1G53800	1	20081644	20084551	+	10	Promoter
1_20096615_20097166	PME2	AT1G53830	1	20098522	20100978	+	1356	1to5kb
1_20100474_20101564	PME1	AT1G53840	1	20101299	20103690	+	265	Promoter
1_20169967_20170247	MVP1	AT1G54030	1	20167597	20169684	+	2370	Intergenic
1_20177808_20178138	AT1G54050	AT1G54050	1	20179357	20180566	-	2428	Intergenic
1_20180442_20180710	ASIL1	AT1G54060	1	20180610	20182374	+	100	Promoter
1_20186539_20187309	UBP1A	AT1G54080	1	20183545	20187096	-	213	Promoter
1_20189380_20189684	EXO70D2	AT1G54090	1	20189472	20191900	+	92	Promoter
1_20191933_20192697	EXO70D2	AT1G54090	1	20189472	20191900	+	2461	Intergenic
1_20198930_20199367	AT1G54110	AT1G54110	1	20199310	20201787	+	57	Promoter
1_20207003_20207238	AT1G54120	AT1G54120	1	20206930	20207555	+	73	5UTR
1_20209998_20210573	RSH3	AT1G54130	1	20210772	20213942	+	199	Promoter
1_20237194_20237668	AT1G54200	AT1G54200	1	20235465	20237358	+	1729	3UTR
1_20238932_20239975	ATG12A	AT1G54210	1	20241226	20242641	+	1251	1to5kb
1_20250165_20250456	AT1G54230	AT1G54230	1	20250518	20252365	+	62	Promoter
1_20252521_20252806	AT1G54240	AT1G54240	1	20252718	20254708	+	88	Promoter
1_20259309_20259875	AT1G54260	AT1G54260	1	20256936	20259417	+	2373	3UTR
1_20310536_20310872	AT1G54410	AT1G54410	1	20309473	20310850	-	22	Promoter
1_20385108_20385453	PES1	AT1G54570	1	20380435	20385380	-	73	Promoter
1_20385917_20386296	AT1G54575	AT1G54575	1	20386809	20387710	+	513	Promoter
1_20396968_20397308	AT1G54610	AT1G54610	1	20393664	20397295	-	13	Promoter
1_20400939_20401319	ACP3	AT1G54630	1	20401357	20403166	-	1847	Intergenic
1_20402857_20403302	ACP3	AT1G54630	1	20401357	20403166	-	136	Promoter
1_20415376_20415706	GAMMA-H2AX	AT1G54690	1	20414316	20415287	-	89	Promoter
1_20416688_20416938	ATG18H	AT1G54710	1	20416770	20421156	-	4218	Intronexonboundary
1_20420815_20421618	ATG18H	AT1G54710	1	20416770	20421156	-	341	Promoter
1_20424675_20425115	AT1G54730	AT1G54730	1	20424332	20430194	+	343	Intronexonboundary
1_20445588_20446092	AT1G54820	AT1G54820	1	20447157	20450916	+	1065	1to5kb
1_20448794_20449185	AT1G54820	AT1G54820	1	20447157	20450916	+	1637	Intron
1_20454238_20454531	AT1G54840	AT1G54840	1	20452593	20454266	-	28	Promoter
1_20510832_20511353	AXR4	AT1G54990	1	20511519	20513681	+	166	Promoter
1_20521358_20521872	LOX1	AT1G55020	1	20525654	20530468	+	3782	1to5kb
1_20522295_20522592	LOX1	AT1G55020	1	20525654	20530468	+	3062	1to5kb
1_20524589_20524831	LOX1	AT1G55020	1	20525654	20530468	+	823	Promoter
1_20526278_20526552	LOX1	AT1G55020	1	20525654	20530468	+	624	Intron
1_20554213_20554440	MED9	AT1G55080	1	20552905	20554272	-	59	Promoter
1_20562152_20562699	IDD7	AT1G55110	1	20560258	20563269	-	570	Intronexonboundary
1_20587883_20588554	PRA7	AT1G55190	1	20588397	20589199	+	157	Promoter
1_20597629_20598028	AT1G55210	AT1G55210	1	20597734	20598768	-	740	3UTR
1_20611936_20612828	HUB2	AT1G55250	1	20606953	20612649	+	4983	Intronexonboundary
1_20624563_20624810	AT1G55280	AT1G55280	1	20622930	20624794	-	16	Promoter
1_20637104_20637519	GCT	AT1G55325	1	20637333	20648434	+	186	Promoter
1_20647964_20648326	GCT	AT1G55325	1	20637333	20648434	+	10631	3UTR
1_20648789_20649108	AT1G55335	AT1G55335	1	20648469	20648832	+	320	Exon
1_20649611_20650045	AGP21	AT1G55330	1	20648465	20648891	-	720	Promoter
1_20651154_20652016	AT1G55340	AT1G55340	1	20651814	20653764	+	202	Promoter
1_20664949_20665274	DEK1	AT1G55350	1	20653740	20665110	-	161	Promoter
1_20668701_20669053	AT1G55360	AT1G55360	1	20666180	20668817	-	116	Promoter
1_20671033_20671527	AT1G55365	AT1G55365	1	20673455	20674503	-	2976	Intergenic
1_20674274_20674607	AT1G55365	AT1G55365	1	20673455	20674503	-	104	Promoter
1_20711050_20711635	AT1G55475	AT1G55475	1	20711465	20713560	+	170	Promoter
1_20723162_20723571	BCDH BETA1	AT1G55510	1	20723279	20725747	+	117	Promoter
1_20749021_20749303	AT1G55550	AT1G55550	1	20748639	20753079	+	382	Intronexonboundary
1_20783423_20784276	BRL1	AT1G55610	1	20779493	20784017	-	259	Promoter
1_20786790_20787484	CLC-F	AT1G55620	1	20787074	20791208	-	3724	Intronexonboundary
1_20791109_20791446	CLC-F	AT1G55620	1	20787074	20791208	-	99	Promoter
1_20798463_20798769	AT1G55650	AT1G55650	1	20796340	20798594	+	2123	3UTR
1_20803484_20803746	PSAG	AT1G55670	1	20802670	20803449	-	35	Promoter
1_20845169_20845397	AT1G55750	AT1G55750	1	20840091	20845899	-	502	Intronexonboundary
1_20848915_20849614	AT1G55760	AT1G55760	1	20846872	20849054	-	139	Promoter
1_20851384_20851735	AT1G55770	AT1G55770	1	20850977	20851664	-	71	Promoter
1_20859358_20859695	AT1G55805	AT1G55805	1	20858610	20859483	-	125	Promoter
1_20905809_20906170	TIM50	AT1G55900	1	20903053	20905853	+	2756	3UTR
1_20948050_20948426	NAC1	AT1G56010	1	20946571	20949281	-	855	5UTR
1_20951806_20952255	AT1G56020	AT1G56020	1	20951856	20953595	+	50	Promoter
1_20954111_20954347	AT1G56020	AT1G56020	1	20951856	20953595	+	2255	Intergenic
1_20956671_20957132	AT1G56030	AT1G56030	1	20957098	20958550	-	1418	Exon
1_20986923_20987267	NOP56	AT1G56110	1	20984273	20986952	-	29	Promoter
1_21013478_21014251	AT1G56145	AT1G56145	1	21008057	21014095	-	156	Promoter
1_21030673_21030995	AT1G56190	AT1G56190	1	21028137	21030684	+	2536	3UTR
1_21044603_21044871	AT1G56225	AT1G56225	1	21044756	21045708	-	837	Intronexonboundary
1_21051554_21052182	AT1G56233	AT1G56233	1	21050540	21051017	-	537	Promoter
1_21055924_21056230	PP2-B13	AT1G56240	1	21056099	21057577	-	1347	3UTR
1_21059579_21059849	PP2-B14	AT1G56250	1	21061522	21063047	-	3198	Intergenic
1_21063659_21064280	MDO1	AT1G56260	1	21064223	21065875	-	1595	3UTR
1_21079479_21079880	AT1G56300	AT1G56300	1	21078023	21080423	-	543	Intronexonboundary
1_21159332_21159870	AT1G56500	AT1G56500	1	21159736	21167341	+	134	Promoter
1_21198821_21199688	SVB	AT1G56580	1	21198004	21199126	-	305	Promoter
1_21238029_21238715	AT1G56660	AT1G56660	1	21237839	21241014	+	190	Intronexonboundary
1_21362456_21362723	Cand1	AT1G57680	1	21362359	21364749	-	2026	3UTR
1_21393068_21393324	AT1G57765	AT1G57765	1	21393084	21394982	+	16	Promoter
1_21443430_21443707	PUP18	AT1G57990	1	21441179	21443036	-	394	Promoter
1_21507449_21507720	ATP-PRT1	AT1G58080	1	21504314	21507679	-	41	Promoter
1_21539467_21539843	BCA6	AT1G58180	1	21537577	21540038	-	195	Intronexonboundary
1_21552970_21553602	EMB1674	AT1G58210	1	21553537	21554778	+	65	Promoter
1_21661134_21661453	ZW18	AT1G58350	1	21662891	21667629	-	6176	Intergenic
1_21669665_21669919	ZW18	AT1G58350	1	21662891	21667629	-	2036	1to5kb
1_21677697_21677942	AAP1	AT1G58360	1	21676388	21680519	+	1309	Intron
1_21707297_21707726	AT1G58420	AT1G58420	1	21707175	21708125	+	122	5UTR
1_21713150_21713632	RXF26	AT1G58430	1	21711494	21713103	-	47	Promoter
1_21732350_21732611	AT1G58525	AT1G58525	1	21729913	21731344	+	2437	Intergenic
1_21902125_21902418	CW9	AT1G59620	1	21902264	21905717	+	139	Promoter
1_21909521_21909825	BPEp	AT1G59640	1	21909070	21911289	-	1464	3UTR
1_21911133_21911453	BPEp	AT1G59640	1	21909070	21911289	-	156	Promoter
1_21912921_21913335	BPEp	AT1G59640	1	21909070	21911289	-	1632	1to5kb
1_21917278_21917520	CW14	AT1G59650	1	21919745	21923013	+	2225	1to5kb
1_21919752_21920093	CW14	AT1G59650	1	21919745	21923013	+	7	5UTR
1_21979338_21979622	ARF1	AT1G59750	1	21979289	21984433	+	49	Intronexonboundary
1_22011102_22011444	ALA3	AT1G59820	1	22011305	22020386	+	139	Promoter
1_22057180_22057448	AT1G59910	AT1G59910	1	22053863	22057268	-	88	Promoter
1_22066005_22066452	ARR3	AT1G59940	1	22065617	22067233	-	781	Intronexonboundary
1_22066698_22067083	ARR3	AT1G59940	1	22065617	22067233	-	150	Intronexonboundary
1_22094451_22094891	AT1G60000	AT1G60000	1	22093353	22094802	-	89	Promoter
1_22096260_22096696	AT1G60010	AT1G60010	1	22095285	22096620	-	76	Promoter
1_22097584_22097929	AT1G60010	AT1G60010	1	22095285	22096620	-	964	Promoter
1_22099523_22100097	AT1G60010	AT1G60010	1	22095285	22096620	-	2903	1to5kb
1_22149391_22149832	AT1G60070	AT1G60070	1	22142604	22149527	-	136	Promoter
1_22155209_22155455	BGLU4	AT1G60090	1	22155559	22158272	+	104	Promoter
1_22173076_22173347	AT1G60130	AT1G60130	1	22173937	22176343	+	590	Promoter
1_22184573_22185010	TPS10	AT1G60140	1	22176934	22181740	-	2833	1to5kb
1_22200226_22200458	PUB19	AT1G60190	1	22198266	22200687	+	1960	Exon
1_22214209_22214450	AT1G60230	AT1G60230	1	22212084	22214431	-	19	Promoter
1_22269179_22269407	PANK1	AT1G60440	1	22266416	22269258	-	79	Promoter
1_22297170_22297462	DRP4A	AT1G60530	1	22299797	22301167	+	2335	1to5kb
1_22311551_22311804	AT1G60570	AT1G60570	1	22311836	22312981	+	32	Promoter
1_22318372_22318732	AT1G60590	AT1G60590	1	22314089	22317070	-	1302	1to5kb
1_22330076_22330450	AT1G60610	AT1G60610	1	22327792	22330318	-	132	Promoter
1_22343221_22343620	AT1G60670	AT1G60670	1	22343585	22347624	+	35	Promoter
1_22354240_22354710	ATB2	AT1G60710	1	22354698	22356875	-	2165	3UTR
1_22386591_22386855	NIK3	AT1G60800	1	22383393	22387766	-	911	Intronexonboundary
1_22387312_22388417	ACLA-2	AT1G60810	1	22388527	22391237	-	2820	Intergenic
1_22391137_22391365	ACLA-2	AT1G60810	1	22388527	22391237	-	100	Promoter
1_22397548_22397831	ATRPAC42	AT1G60850	1	22397913	22400413	-	2582	Intergenic
1_22400603_22400882	AGD2	AT1G60860	1	22400857	22407824	-	6942	3UTR
1_22416987_22417383	AT1G60890	AT1G60890	1	22412188	22417312	-	71	Promoter
1_22420890_22421216	AT1G60900	AT1G60900	1	22423894	22428053	+	2678	1to5kb
1_22444472_22444713	FED A	AT1G60950	1	22444307	22445291	+	165	5UTR
1_22512113_22512603	AT1G61100	AT1G61100	1	22508524	22512333	-	220	Promoter
1_22515717_22515997	NAC025	AT1G61110	1	22516602	22518292	+	605	Promoter
1_22540643_22541049	EDA16	AT1G61140	1	22534663	22540933	-	116	Promoter
1_22548769_22549056	AT1G61170	AT1G61170	1	22549523	22550711	+	467	Promoter
1_22564117_22564562	DWA3	AT1G61210	1	22564359	22572029	+	203	Promoter
1_22571878_22572183	DWA3	AT1G61210	1	22564359	22572029	+	7519	3UTR
1_22572587_22573258	BRD4	AT1G61215	1	22572609	22575583	+	22	Promoter
1_22576117_22576402	BRD4	AT1G61215	1	22572609	22575583	+	3508	Intron
1_22577488_22577789	AT1G61230	AT1G61230	1	22578951	22580781	+	1162	1to5kb
1_22588608_22589466	AT1G61255	AT1G61255	1	22589098	22589789	-	323	3UTR
1_22602880_22603208	AT1G61280	AT1G61280	1	22603586	22605008	+	378	Promoter
1_22625055_22625544	AT1G61330	AT1G61330	1	22622975	22624527	+	2080	Intergenic
1_22636445_22637038	AT1G61350	AT1G61350	1	22633774	22636101	+	2671	Intergenic
1_22677641_22677990	AT1G61470	AT1G61470	1	22678092	22679302	+	102	Promoter
1_22702012_22702419	AT1G61540	AT1G61540	1	22702498	22703706	+	79	Promoter
1_22768362_22768996	AT1G61667	AT1G61667	1	22767464	22768645	+	898	3UTR
1_22774856_22775220	TPS14	AT1G61680	1	22772315	22774720	-	136	Promoter
1_22794620_22795347	AT1G61730	AT1G61730	1	22793170	22794714	-	94	Promoter
1_22799081_22800139	AT1G61740	AT1G61740	1	22798035	22801416	-	1277	Intronexonboundary
1_22826950_22827332	GPT2	AT1G61800	1	22824414	22826902	+	2536	Intergenic
1_22863147_22863382	AT1G61860	AT1G61860	1	22862655	22864898	-	1516	Intronexonboundary
1_22867680_22867976	AT1G61890	AT1G61890	1	22867689	22871358	-	3382	3UTR
1_22871269_22871530	AT1G61890	AT1G61890	1	22867689	22871358	-	89	Promoter
1_22875830_22876245	AT1G61890	AT1G61890	1	22867689	22871358	-	4472	1to5kb
1_22884970_22885274	AT1G61900	AT1G61900	1	22882176	22885125	-	149	Promoter
1_22885573_22885853	AT1G61900	AT1G61900	1	22882176	22885125	-	448	Promoter
1_22887075_22887413	AT1G61920	AT1G61920	1	22888452	22889037	+	1039	1to5kb
1_22890059_22890515	AT1G61920	AT1G61920	1	22888452	22889037	+	1607	Intergenic
1_22892884_22893726	AT1G61930	AT1G61930	1	22893101	22894064	+	217	Promoter
1_22895931_22896437	TLP4	AT1G61940	1	22897399	22898725	-	2288	Intergenic
1_22926656_22927601	AT1G62030	AT1G62030	1	22924039	22926625	-	31	Promoter
1_22928376_22928620	AT1G62030	AT1G62030	1	22924039	22926625	-	1751	1to5kb
1_22930404_22930772	ATG8C	AT1G62040	1	22932760	22934549	+	1988	1to5kb
1_22936590_22937070	AT1G62050	AT1G62050	1	22936049	22939024	-	1954	Intronexonboundary
1_22939069_22939423	AT1G62050	AT1G62050	1	22936049	22939024	-	45	Promoter
1_22977506_22977740	APR2	AT1G62180	1	22975530	22977885	-	145	5UTR
1_22980930_22981243	PTR6	AT1G62200	1	22980934	22984422	-	3179	3UTR
1_22984408_22984650	PTR6	AT1G62200	1	22980934	22984422	-	14	Promoter
1_22997456_22997818	MEF9	AT1G62260	1	22997755	22999829	-	2011	3UTR
1_23015840_23016142	WRKY6	AT1G62300	1	23016569	23019494	-	3352	Intergenic
1_23016503_23016911	WRKY6	AT1G62300	1	23016569	23019494	-	2583	3UTR
1_23019240_23019476	WRKY6	AT1G62300	1	23016569	23019494	-	18	Intronexonboundary
1_23020419_23020736	WRKY6	AT1G62300	1	23016569	23019494	-	925	Promoter
1_23026420_23026737	AT1G62305	AT1G62305	1	23026692	23029531	-	2794	3UTR
1_23039695_23039971	AT1G62310	AT1G62310	1	23033403	23039787	-	92	Promoter
1_23057113_23057421	AT1G62350	AT1G62350	1	23056386	23058114	+	727	Intronexonboundary
1_23071817_23072597	AT1G62370	AT1G62370	1	23072222	23073545	+	375	Promoter
1_23075446_23075868	AT1G62370	AT1G62370	1	23072222	23073545	+	3224	Intron
1_23139065_23139301	AT1G62515	AT1G62515	1	23136720	23137413	+	2345	Intergenic
1_23166313_23166594	FMO GS-OX4	AT1G62570	1	23168767	23172175	+	2173	1to5kb
1_23244838_23245114	AT1G62770	AT1G62770	1	23245835	23246949	-	1835	Intergenic
1_23252085_23252506	AT1G62790	AT1G62790	1	23252140	23253743	+	55	Promoter
1_23257402_23257649	CuAO1	AT1G62810	1	23257610	23262002	-	4353	3UTR
1_23286692_23287695	AT1G62870	AT1G62870	1	23283912	23286797	-	105	Promoter
1_23335228_23336108	AT1G62981	AT1G62981	1	23333619	23335395	+	1609	Intronexonboundary
1_23353132_23353429	AT1G63010	AT1G63010	1	23347561	23352831	-	301	Promoter
1_23361758_23362732	NRPD1A	AT1G63020	1	23354685	23362589	-	143	Promoter
1_23392539_23392881	PP2-A11	AT1G63090	1	23390968	23392873	-	8	Promoter
1_23410797_23411276	RBL2	AT1G63120	1	23408804	23411139	-	137	Promoter
1_23412253_23412838	AT1G63130	AT1G63130	1	23412518	23415155	+	265	Promoter
1_23416326_23416720	AT1G63140	AT1G63140	1	23417441	23419045	+	721	Promoter
1_23539047_23539327	AT1G63470	AT1G63470	1	23536466	23539242	-	85	Promoter
1_23555523_23555749	BSK7	AT1G63500	1	23555399	23558917	+	124	5UTR
1_23595654_23596195	AT1G63640	AT1G63640	1	23588936	23595925	-	270	Promoter
1_23599398_23599709	EGL3	AT1G63650	1	23599413	23603164	+	15	Promoter
1_23614457_23614705	MURE	AT1G63680	1	23614340	23617912	+	117	5UTR
1_23617731_23618292	MURE	AT1G63680	1	23614340	23617912	+	3391	3UTR
1_23619784_23620275	SPPL2	AT1G63690	1	23618012	23622396	+	1772	Intronexonboundary
1_23630576_23630999	YDA	AT1G63700	1	23624627	23630073	-	503	Promoter
1_23637761_23638342	AT1G63720	AT1G63720	1	23635745	23637577	-	184	Promoter
1_23684156_23684417	AT1G63820	AT1G63820	1	23682278	23684373	-	44	Promoter
1_23684973_23685264	AT1G63830	AT1G63830	1	23685093	23687374	+	120	Promoter
1_23689389_23690631	AT1G63840	AT1G63840	1	23689603	23690807	-	176	Intronexonboundary
1_23691848_23692082	AT1G63840	AT1G63840	1	23689603	23690807	-	1041	1to5kb
1_23692964_23693358	AT1G63840	AT1G63840	1	23689603	23690807	-	2157	1to5kb
1_23694080_23694363	AT1G63850	AT1G63850	1	23696720	23699030	+	2357	1to5kb
1_23695539_23695884	AT1G63850	AT1G63850	1	23696720	23699030	+	836	Promoter
1_23696552_23697011	AT1G63850	AT1G63850	1	23696720	23699030	+	168	Promoter
1_23700985_23701332	AT1G63855	AT1G63855	1	23699369	23701013	-	28	Promoter
1_23760598_23761108	TOPP3	AT1G64040	1	23758241	23760663	-	65	Promoter
1_23762141_23762506	AT1G64050	AT1G64050	1	23762259	23766168	+	118	Promoter
1_23773233_23773498	RBOH F	AT1G64060	1	23769774	23776984	+	3459	Intronexonboundary
1_23776591_23777360	RBOH F	AT1G64060	1	23769774	23776984	+	6817	3UTR
1_23777891_23778563	AT1G64065	AT1G64065	1	23778255	23779529	+	308	Promoter
1_23783801_23784186	RLM1	AT1G64070	1	23779927	23783449	+	3874	Intergenic
1_23788877_23789199	RTNLB3	AT1G64090	1	23789062	23791229	+	137	Promoter
1_23794776_23795093	NAC027	AT1G64105	1	23795050	23795642	+	43	Promoter
1_23801939_23802369	DAA1	AT1G64110	1	23796698	23801799	-	140	Promoter
1_23807509_23807908	AT1G64140	AT1G64140	1	23803793	23807159	-	350	Promoter
1_23812592_23812877	AT1G64150	AT1G64150	1	23808835	23812725	-	133	Promoter
1_23817818_23818169	CHX16	AT1G64170	1	23814984	23818481	-	312	Intronexonboundary
1_23820735_23821519	AT1G64180	AT1G64180	1	23821453	23824359	+	66	Promoter
1_23826944_23827172	AT1G64190	AT1G64190	1	23825328	23827136	-	36	Promoter
1_23833523_23833790	UBC28	AT1G64230	1	23833485	23835539	+	38	Intronexonboundary
1_23850402_23850639	AT1G64260	AT1G64260	1	23847405	23850142	+	2997	Intergenic
1_23862890_23863250	AT1G64300	AT1G64300	1	23863066	23866045	+	176	Promoter
1_23870833_23871215	AT1G64330	AT1G64330	1	23870885	23874201	+	52	Promoter
1_23890145_23890491	AT1G64370	AT1G64370	1	23888832	23890132	+	1313	Intergenic
1_23890902_23891407	AT1G64380	AT1G64380	1	23890570	23892193	-	786	3UTR
1_23893593_23893855	AT1G64380	AT1G64380	1	23890570	23892193	-	1400	1to5kb
1_23895769_23896279	AT1G64380	AT1G64380	1	23890570	23892193	-	3576	1to5kb
1_23902865_23903142	AT1G64385	AT1G64385	1	23899994	23902281	+	2871	Intergenic
1_23908227_23909177	GH9C2	AT1G64390	1	23911024	23915236	+	1847	1to5kb
1_23909671_23909980	GH9C2	AT1G64390	1	23911024	23915236	+	1044	1to5kb
1_23911127_23911411	GH9C2	AT1G64390	1	23911024	23915236	+	103	5UTR
1_23912319_23913065	GH9C2	AT1G64390	1	23911024	23915236	+	1295	Intronexonboundary
1_23914991_23915241	GH9C2	AT1G64390	1	23911024	23915236	+	3967	3UTR
1_23922417_23923838	AT1G64405	AT1G64405	1	23923517	23924395	+	321	Promoter
1_23945391_23945951	None	AT1G64460	1	23943484	23945810	-	141	Promoter
1_23978296_23978688	DUO3	AT1G64570	1	23978613	23983925	+	75	Promoter
1_23995651_23995921	AT1G64600	AT1G64600	1	23995909	23998832	+	12	Promoter
1_24005408_24006166	AT1G64620	AT1G64620	1	24006913	24009415	+	747	Promoter
1_24023289_24023621	AT1G64650	AT1G64650	1	24023498	24026530	-	2909	3UTR
1_24026432_24027053	AT1G64650	AT1G64650	1	24023498	24026530	-	98	Promoter
1_24028327_24029195	MGL	AT1G64660	1	24028830	24030780	+	365	Promoter
1_24033595_24033829	BDG1	AT1G64670	1	24030743	24033674	-	79	Promoter
1_24048404_24048757	CP5	AT1G64720	1	24046553	24048822	-	65	5UTR
1_24049852_24050085	TUA1	AT1G64740	1	24050006	24052487	+	79	Promoter
1_24056362_24056659	AT1G64760	AT1G64760	1	24054051	24056491	-	129	Promoter
1_24060748_24061081	AMT1%3B2	AT1G64780	1	24060640	24062804	-	1723	3UTR
1_24064116_24064403	ILA	AT1G64790	1	24064822	24083428	-	19025	Intergenic
1_24097440_24098139	AT1G64850	AT1G64850	1	24096290	24097733	-	293	Promoter
1_24113035_24113411	CYP89A2	AT1G64900	1	24113109	24114984	+	74	Promoter
1_24135770_24136671	G-TMT	AT1G64970	1	24134085	24136109	-	339	Promoter
1_24149055_24149500	AT1G65010	AT1G65010	1	24149208	24154412	+	153	Promoter
1_24245009_24245325	AT1G65270	AT1G65270	1	24241706	24245074	+	3303	3UTR
1_24251359_24251681	AT1G65295	AT1G65295	1	24251373	24252940	+	14	Promoter
1_24315095_24315544	GLC	AT1G65450	1	24315722	24319092	+	178	Promoter
1_24323869_24324258	FAS1	AT1G65470	1	24319396	24324091	-	167	Promoter
1_24388201_24388659	HEXO3	AT1G65590	1	24385552	24391208	+	2649	Intronexonboundary
1_24442836_24443110	YSL7	AT1G65730	1	24442388	24446291	+	448	Intronexonboundary
1_24443419_24443648	YSL7	AT1G65730	1	24442388	24446291	+	1031	Intron
1_24487864_24488227	AT1G65820	AT1G65820	1	24485046	24486954	+	2818	Intergenic
1_24489519_24490062	PAO4	AT1G65840	1	24489758	24493077	+	239	Promoter
1_24515187_24515467	AT1G65900	AT1G65900	1	24515758	24518601	-	3134	Intergenic
1_24529280_24529531	AT1G65920	AT1G65920	1	24525102	24529362	-	82	Promoter
1_24536956_24537296	cICDH	AT1G65930	1	24538886	24542712	+	1590	1to5kb
1_24550972_24551250	AT1G65950	AT1G65950	1	24546682	24551144	-	106	Promoter
1_24559064_24559573	TPX1	AT1G65980	1	24559253	24560980	-	1407	3UTR
1_24598582_24598828	AT1G66070	AT1G66070	1	24595774	24598631	-	49	Promoter
1_24612025_24612933	AAE11	AT1G66120	1	24612620	24614805	+	313	Promoter
1_24614479_24615391	AAE11	AT1G66120	1	24612620	24614805	+	1859	3UTR
1_24627201_24627650	CLE18	AT1G66145	1	24628530	24628835	-	1185	Intergenic
1_24627924_24628179	CLE18	AT1G66145	1	24628530	24628835	-	656	Intergenic
1_24629563_24629955	CLE18	AT1G66145	1	24628530	24628835	-	728	Promoter
1_24634612_24634857	TMK1	AT1G66150	1	24631338	24634781	+	3274	3UTR
1_24658216_24658648	GSR2	AT1G66200	1	24655115	24657703	-	513	Promoter
1_24675175_24675521	AT1G66220	AT1G66220	1	24670536	24673661	+	4639	Intronexonboundary
1_24680850_24681299	AT1G66235	AT1G66235	1	24682907	24683996	-	2697	Intergenic
1_24684072_24684634	AT1G66235	AT1G66235	1	24682907	24683996	-	76	Promoter
1_24743882_24744354	RGL1	AT1G66350	1	24748105	24750186	+	3751	1to5kb
1_24770016_24770690	CML23	AT1G66400	1	24770419	24771393	-	703	3UTR
1_24775748_24776009	CAM4	AT1G66410	1	24774113	24775984	-	25	Promoter
1_24793203_24793482	AT1G66460	AT1G66460	1	24789735	24792163	-	1040	1to5kb
1_24801475_24801731	AT1G66480	AT1G66480	1	24805418	24807557	-	5826	Intergenic
1_24807254_24807557	AT1G66480	AT1G66480	1	24805418	24807557	-	0	5UTR
1_24824777_24825250	AT1G66540	AT1G66540	1	24824356	24826683	+	421	5UTR
1_24847706_24848159	ABO3	AT1G66600	1	24848320	24849543	+	161	Promoter
1_24865567_24866058	AR401	AT1G66680	1	24866095	24869087	-	3029	Intergenic
1_24883653_24883886	LIG6	AT1G66730	1	24884681	24892046	+	795	Promoter
1_24884586_24884934	LIG6	AT1G66730	1	24884681	24892046	+	95	Promoter
1_24892322_24892611	SGA2	AT1G66740	1	24892340	24893876	+	18	Promoter
1_24898537_24899028	CAK4	AT1G66750	1	24894523	24897259	+	4014	Intergenic
1_24905393_24905949	SWEET6	AT1G66770	1	24906451	24907236	-	1287	Intergenic
1_24930019_24930310	AT1G66830	AT1G66830	1	24929898	24932937	-	2627	3UTR
1_25022684_25022991	TRM22	AT1G67040	1	25019105	25022704	-	20	Promoter
1_25027651_25027919	AT1G67050	AT1G67050	1	25028538	25029857	-	1938	Intergenic
1_25029659_25030256	AT1G67050	AT1G67050	1	25028538	25029857	-	198	Promoter
1_25030935_25031189	AT1G67050	AT1G67050	1	25028538	25029857	-	1078	1to5kb
1_25031911_25032184	AT1G67050	AT1G67050	1	25028538	25029857	-	2054	1to5kb
1_25040005_25040534	AT1G67060	AT1G67060	1	25036502	25039439	+	3503	Intergenic
1_25047321_25048110	RBCS1A	AT1G67090	1	25048158	25049667	-	1557	Intergenic
1_25049969_25050210	RBCS1A	AT1G67090	1	25048158	25049667	-	302	Promoter
1_25095540_25095844	AT1G67120	AT1G67120	1	25069428	25095638	-	98	Promoter
1_25127132_25127421	AT1G67160	AT1G67160	1	25124819	25127098	-	34	Promoter
1_25156155_25156403	LINC1	AT1G67230	1	25151211	25156389	-	14	Promoter
1_25158461_25158727	LINC1	AT1G67230	1	25151211	25156389	-	2072	1to5kb
1_25165006_25165359	AT1G67250	AT1G67250	1	25163599	25165056	-	50	Promoter
1_25203163_25203550	AT1G67310	AT1G67310	1	25198182	25203126	-	37	Promoter
1_25215455_25215863	AT1G67330	AT1G67330	1	25213852	25215174	+	1603	Intron
1_25234904_25235353	AT1G67350	AT1G67350	1	25235271	25236878	+	82	Promoter
1_25253922_25254879	AT1G67410	AT1G67410	1	25251166	25253682	-	240	Promoter
1_25296744_25297007	REV3	AT1G67500	1	25287356	25296988	-	19	Promoter
1_25312407_25312672	URE	AT1G67550	1	25312660	25317495	+	12	Promoter
1_25319139_25320076	LOX6	AT1G67560	1	25319804	25324581	+	272	Promoter
1_25320396_25320898	LOX6	AT1G67560	1	25319804	25324581	+	592	Intronexonboundary
1_25332743_25333784	AT1G67590	AT1G67590	1	25333058	25335025	-	1241	Intronexonboundary
1_25334517_25335265	AT1G67590	AT1G67590	1	25333058	25335025	-	240	Promoter
1_25344078_25344490	POLA2	AT1G67630	1	25344440	25348406	-	3916	3UTR
1_25391275_25391519	AT1G67720	AT1G67720	1	25386131	25391258	+	5144	Intergenic
1_25393613_25394057	PSBY	AT1G67740	1	25394031	25395249	-	1192	3UTR
1_25395085_25395325	PSBY	AT1G67740	1	25394031	25395249	-	76	Promoter
1_25399109_25399365	AT1G67750	AT1G67750	1	25401514	25403595	+	2149	1to5kb
1_25404290_25404566	AT1G67750	AT1G67750	1	25401514	25403595	+	2776	Intergenic
1_25417261_25417555	AT1G67790	AT1G67790	1	25417542	25420099	-	2544	Exon
1_25437086_25437592	CSK	AT1G67840	1	25434027	25437096	+	3059	3UTR
1_25453564_25453911	AT1G67880	AT1G67880	1	25453823	25455823	-	1912	3UTR
1_25455741_25456396	AT1G67880	AT1G67880	1	25453823	25455823	-	82	Promoter
1_25464220_25464566	AT1G67900	AT1G67900	1	25464376	25470189	+	156	Promoter
1_25465997_25466237	AT1G67900	AT1G67900	1	25464376	25470189	+	1621	Intron
1_25467133_25467679	AT1G67900	AT1G67900	1	25464376	25470189	+	2757	5UTR
1_25477097_25477757	ABCI17	AT1G67940	1	25477670	25478803	+	87	Promoter
1_25480071_25480385	AT1G67950	AT1G67950	1	25478713	25480580	-	195	Intronexonboundary
1_25501602_25501986	AT1G68030	AT1G68030	1	25500378	25501803	-	183	Promoter
1_25502905_25503189	AT1G68040	AT1G68040	1	25502864	25505263	+	41	Intronexonboundary
1_25507817_25508520	FKF1	AT1G68050	1	25508639	25510907	+	119	Promoter
1_25514088_25514902	MAP70-1	AT1G68060	1	25510887	25514601	-	301	Promoter
1_25531467_25532186	IDD14	AT1G68130	1	25532008	25534698	+	178	Promoter
1_25537060_25537381	AT1G68140	AT1G68140	1	25538924	25541823	-	4442	Intergenic
1_25537791_25538048	AT1G68140	AT1G68140	1	25538924	25541823	-	3775	Intergenic
1_25548678_25549494	AT1G68160	AT1G68160	1	25545758	25548894	-	216	Promoter
1_25555987_25556293	AT1G68185	AT1G68185	1	25556383	25558533	+	90	Promoter
1_25595649_25596390	ENDO2	AT1G68290	1	25596671	25598438	+	281	Promoter
1_25611917_25612314	AT1G68330	AT1G68330	1	25610723	25612469	+	1194	Intronexonboundary
1_25615321_25615616	AT1G68340	AT1G68340	1	25613926	25615404	-	83	Promoter
1_25617232_25617566	AT1G68350	AT1G68350	1	25616405	25617265	+	827	Intronexonboundary
1_25646948_25647852	AT1G68400	AT1G68400	1	25646039	25649254	-	1402	Intronexonboundary
1_25649021_25649461	AT1G68410	AT1G68410	1	25649624	25653019	-	3558	Intergenic
1_25652643_25653336	AT1G68410	AT1G68410	1	25649624	25653019	-	317	Promoter
1_25656943_25657247	AT1G68440	AT1G68440	1	25657757	25659484	+	510	Promoter
1_25657584_25659755	AT1G68440	AT1G68440	1	25657757	25659484	+	173	Promoter
1_25660537_25661181	PDE337	AT1G68450	1	25661487	25662276	-	1095	Intergenic
1_25663612_25663963	PDE337	AT1G68450	1	25661487	25662276	-	1336	1to5kb
1_25684338_25684652	JAG	AT1G68480	1	25684314	25686195	-	1543	3UTR
1_25689955_25690354	AT1G68490	AT1G68490	1	25693449	25696250	+	3095	1to5kb
1_25692471_25692850	AT1G68490	AT1G68490	1	25693449	25696250	+	599	Promoter
1_25693257_25693646	AT1G68490	AT1G68490	1	25693449	25696250	+	192	Promoter
1_25695176_25696139	AT1G68490	AT1G68490	1	25693449	25696250	+	1727	3UTR
1_25699626_25700066	AT1G68500	AT1G68500	1	25701770	25702778	+	1704	1to5kb
1_25700347_25700664	AT1G68500	AT1G68500	1	25701770	25702778	+	1106	1to5kb
1_25711054_25711298	BBX14	AT1G68520	1	25708175	25710989	-	65	Promoter
1_25714844_25715295	KCS6	AT1G68530	1	25712414	25715024	-	180	Promoter
1_25717672_25718276	TKPR2	AT1G68540	1	25719958	25721549	+	1682	1to5kb
1_25724561_25725463	CRF10	AT1G68550	1	25725455	25727701	-	2238	3UTR
1_25727324_25728415	CRF10	AT1G68550	1	25725455	25727701	-	377	Promoter
1_25730599_25731345	XYL1	AT1G68560	1	25734060	25738134	-	6789	Intergenic
1_25732218_25733454	XYL1	AT1G68560	1	25734060	25738134	-	4680	Intergenic
1_25740886_25741635	XYL1	AT1G68560	1	25734060	25738134	-	2752	1to5kb
1_25742244_25742956	AT1G68570	AT1G68570	1	25746697	25750291	+	3741	1to5kb
1_25745372_25745609	AT1G68570	AT1G68570	1	25746697	25750291	+	1088	1to5kb
1_25748665_25748941	AT1G68570	AT1G68570	1	25746697	25750291	+	1968	Intron
1_25749624_25750106	AT1G68570	AT1G68570	1	25746697	25750291	+	2927	Intronexonboundary
1_25750444_25750723	AT1G68570	AT1G68570	1	25746697	25750291	+	3747	Intron
1_25752341_25752920	AT1G68580	AT1G68580	1	25752624	25756113	+	283	Promoter
1_25758919_25759202	PSRP3/1	AT1G68590	1	25757404	25758411	-	508	Promoter
1_25775492_25775807	AT1G68650	AT1G68650	1	25775731	25777910	+	76	Promoter
1_25781173_25782196	AT1G68670	AT1G68670	1	25781801	25784118	+	395	Promoter
1_25785159_25785635	AT1G68680	AT1G68680	1	25785506	25787342	+	129	Promoter
1_25797890_25798907	AT1G68710	AT1G68710	1	25793207	25799061	-	154	Intronexonboundary
1_25800524_25801016	AT1G68710	AT1G68710	1	25793207	25799061	-	1463	1to5kb
1_25803431_25803755	TADA	AT1G68720	1	25804392	25809031	+	637	Promoter
1_25809032_25809313	TADA	AT1G68720	1	25804392	25809031	+	4640	Intergenic
1_25839298_25839724	LINC3	AT1G68790	1	25834686	25839541	-	183	Promoter
1_25849549_25849984	TCP12	AT1G68800	1	25845892	25850131	-	147	5UTR
1_25865486_25865740	AT1G68820	AT1G68820	1	25865471	25869029	+	15	5UTR
1_25868955_25869213	AT1G68820	AT1G68820	1	25865471	25869029	+	3484	3UTR
1_25870043_25870682	RTFL15	AT1G68825	1	25869700	25870420	-	262	Promoter
1_25875358_25875692	STN7	AT1G68830	1	25872412	25875662	-	30	Promoter
1_25877484_25878013	STN7	AT1G68830	1	25872412	25875662	-	1822	1to5kb
1_25887176_25887707	AT1G68862	AT1G68862	1	25886673	25889127	-	1420	Intronexonboundary
1_25891471_25891807	AT1G68875	AT1G68875	1	25892086	25892811	+	279	Promoter
1_25914944_25915207	AT1G68920	AT1G68920	1	25914976	25918007	+	32	Promoter
1_25940979_25941805	MGP3	AT1G68990	1	25934997	25940996	-	17	Promoter
1_25949042_25949409	AT1G69030	AT1G69030	1	25947236	25949340	-	69	Promoter
1_25951691_25952099	AT1G69030	AT1G69030	1	25947236	25949340	-	2351	1to5kb
1_25954818_25955387	ACR4	AT1G69040	1	25957567	25960401	+	2180	1to5kb
1_25957530_25957813	ACR4	AT1G69040	1	25957567	25960401	+	37	Promoter
1_25961509_25961782	AT1G69050	AT1G69050	1	25961604	25962435	+	95	Promoter
1_25964245_25964487	AT1G69060	AT1G69060	1	25964319	25967450	+	74	Promoter
1_25971457_25971757	AT1G69070	AT1G69070	1	25967312	25971542	-	85	Promoter
1_25996083_25996406	AT1G69150	AT1G69150	1	25993262	25995435	-	648	Promoter
1_26001260_26002050	AT1G69160	AT1G69160	1	25999837	26001614	+	1423	3UTR
1_26004058_26004362	AT1G69170	AT1G69170	1	26005068	26007368	+	706	Promoter
1_26037474_26037867	AFP1	AT1G69260	1	26038905	26040720	+	1038	1to5kb
1_26038435_26039257	AFP1	AT1G69260	1	26038905	26040720	+	352	Promoter
1_26042595_26043140	RPK1	AT1G69270	1	26040689	26042741	-	146	Promoter
1_26050323_26050849	PDCB4	AT1G69295	1	26050143	26052721	-	1872	Intronexonboundary
1_26053032_26053455	PDCB4	AT1G69295	1	26050143	26052721	-	311	Promoter
1_26057998_26058378	WRKY57	AT1G69310	1	26054275	26058383	-	5	5UTR
1_26062637_26062873	CLE10	AT1G69320	1	26061774	26062536	+	863	Intergenic
1_26076154_26076614	AT1G69360	AT1G69360	1	26072284	26076374	-	220	Promoter
1_26079948_26080192	CM3	AT1G69370	1	26079956	26081727	+	8	Promoter
1_26088977_26089232	ELF5A-3	AT1G69410	1	26089030	26090734	+	53	Promoter
1_26090904_26091278	ELF5A-3	AT1G69410	1	26089030	26090734	+	1874	Intergenic
1_26091645_26092238	AT1G69420	AT1G69420	1	26093026	26097167	+	788	Promoter
1_26092827_26093533	AT1G69420	AT1G69420	1	26093026	26097167	+	199	Promoter
1_26113356_26113617	AT1G69470	AT1G69470	1	26113575	26113997	+	42	Promoter
1_26133532_26134623	AT1G69526	AT1G69526	1	26131294	26133313	+	2238	Intergenic
1_26137289_26137558	AT1G69526	AT1G69526	1	26131294	26133313	+	5995	Intergenic
1_26141417_26142332	EXPA1	AT1G69530	1	26141726	26143538	+	309	Promoter
1_26142600_26143268	EXPA1	AT1G69530	1	26141726	26143538	+	874	Intronexonboundary
1_26144224_26144709	AGL94	AT1G69540	1	26145001	26147751	-	3042	Intergenic
1_26153277_26153913	AT1G69550	AT1G69550	1	26148021	26153600	-	313	Promoter
1_26159796_26160185	MYB105	AT1G69560	1	26157702	26159094	+	2094	Intergenic
1_26163040_26163540	AT1G69570	AT1G69570	1	26161528	26163715	-	175	Intronexonboundary
1_26164385_26164801	AT1G69570	AT1G69570	1	26161528	26163715	-	670	Promoter
1_26171767_26172035	AT1G69580	AT1G69580	1	26171856	26174022	+	89	Promoter
1_26173788_26174189	AT1G69580	AT1G69580	1	26171856	26174022	+	1932	Intron
1_26175136_26175904	AT1G69580	AT1G69580	1	26171856	26174022	+	3280	Intronexonboundary
1_26181187_26181485	ZFHD1	AT1G69600	1	26182156	26183546	+	671	Promoter
1_26186360_26186654	AT1G69610	AT1G69610	1	26186713	26189568	+	59	Promoter
1_26197360_26197718	AT1G69650	AT1G69650	1	26197498	26198821	-	1103	Intronexonboundary
1_26216022_26216398	TCP15	AT1G69690	1	26216009	26218071	+	13	5UTR
1_26240522_26241097	AT1G69760	AT1G69760	1	26239260	26240843	-	254	Promoter
1_26241442_26243291	AT1G69760	AT1G69760	1	26239260	26240843	-	599	Promoter
1_26243557_26243971	AT1G69760	AT1G69760	1	26239260	26240843	-	2714	1to5kb
1_26244214_26244556	AT1G69760	AT1G69760	1	26239260	26240843	-	3371	1to5kb
1_26253381_26253840	CMT3	AT1G69770	1	26248118	26253687	-	153	Promoter
1_26254883_26255660	CMT3	AT1G69770	1	26248118	26253687	-	1196	1to5kb
1_26257748_26258017	ATHB13	AT1G69780	1	26258788	26260781	+	771	Promoter
1_26258875_26259129	ATHB13	AT1G69780	1	26258788	26260781	+	87	5UTR
1_26260004_26260951	ATHB13	AT1G69780	1	26258788	26260781	+	1216	Intronexonboundary
1_26279029_26279353	WRKY36	AT1G69810	1	26276948	26279255	-	98	Promoter
1_26281566_26282056	AT1G69818	AT1G69818	1	26282320	26283481	+	264	Promoter
1_26293099_26293399	AMY3	AT1G69830	1	26288228	26293173	-	74	Promoter
1_26306631_26306899	AT1G69860	AT1G69860	1	26309628	26312174	+	2729	1to5kb
1_26314180_26314620	NRT1.7	AT1G69870	1	26315787	26320233	+	1167	1to5kb
1_26315646_26316427	NRT1.7	AT1G69870	1	26315787	26320233	+	141	Promoter
1_26325045_26325376	AT1G69890	AT1G69890	1	26323086	26324946	-	99	Promoter
1_26326525_26326829	AT1G69900	AT1G69900	1	26326216	26327965	-	1136	Exon
1_26328614_26328944	AT1G69900	AT1G69900	1	26326216	26327965	-	649	Promoter
1_26334463_26334761	GSTU12	AT1G69920	1	26334250	26335630	-	869	Intronexonboundary
1_26338663_26339208	GSTU11	AT1G69930	1	26337481	26338818	-	155	Promoter
1_26352372_26352686	CLE26	AT1G69970	1	26352563	26354613	-	1927	3UTR
1_26357615_26357903	AT1G69980	AT1G69980	1	26355874	26357731	-	116	Promoter
[truncated: 7,812 more rows]
